# Supplementary material for: Identification of climate change induced heat stress sensitive environments and prediction for diverse representative concentration pathways – A novel approach for tracking hotspots
Source: Research Square preprint supplement (doi:10.21203/rs.3.rs-308962/v1), 2021-03-17
Supplement: Supplementary file 1 [file ad4c3357c2bda36effa6445d.xlsx]

## Sheet: Dharwad
Day	Center	Min. Temperature	Max. Temperature	Rainfall
1984-01-01	Dharwad	18.56	29.05	0
1984-01-02	Dharwad	17.94	28.91	0
1984-01-03	Dharwad	17.08	28.52	0
1984-01-04	Dharwad	17.1	29.55	0
1984-01-05	Dharwad	17.56	30.52	0
1984-01-06	Dharwad	17.25	30.54	0
1984-01-07	Dharwad	17.63	30.81	0
1984-01-08	Dharwad	17.66	30.96	0
1984-01-09	Dharwad	17.94	29.65	0
1984-01-10	Dharwad	16.97	30.89	0
1984-01-11	Dharwad	16.64	30.75	0
1984-01-12	Dharwad	15.99	30.5	0
1984-01-13	Dharwad	16.91	30.58	0
1984-01-14	Dharwad	16.8	30.24	0
1984-01-15	Dharwad	17.99	31.98	0
1984-01-16	Dharwad	18.61	31.72	0
1984-01-17	Dharwad	17.82	31.38	0
1984-01-18	Dharwad	18.33	31.79	0
1984-01-19	Dharwad	18.49	31.94	0
1984-01-20	Dharwad	17.62	31.98	0
1984-01-21	Dharwad	15.33	31.56	0
1984-01-22	Dharwad	13.34	31.26	0
1984-01-23	Dharwad	12.95	30.63	0
1984-01-24	Dharwad	13.68	29.73	0
1984-01-25	Dharwad	15.95	30.59	0
1984-01-26	Dharwad	16.84	30.49	0
1984-01-27	Dharwad	16.96	30.96	0
1984-01-28	Dharwad	16.65	31.27	0
1984-01-29	Dharwad	17.22	31.64	0
1984-01-30	Dharwad	18.46	31.89	0
1984-01-31	Dharwad	19.1	31.4	0
1984-02-01	Dharwad	18.39	32.36	0
1984-02-02	Dharwad	18.25	31.8	0
1984-02-03	Dharwad	17.34	31.9	0
1984-02-04	Dharwad	17.55	32.04	0
1984-02-05	Dharwad	18.78	32.04	0
1984-02-06	Dharwad	19.65	33.53	0
1984-02-07	Dharwad	20.03	33.02	0
1984-02-08	Dharwad	19.64	32.77	0
1984-02-09	Dharwad	20.48	32.14	0
1984-02-10	Dharwad	20.1	33.05	0
1984-02-11	Dharwad	19.01	33.03	0
1984-02-12	Dharwad	18.95	32.51	0
1984-02-13	Dharwad	19.44	31.73	2.6
1984-02-14	Dharwad	19.72	32.43	0
1984-02-15	Dharwad	19.41	32.41	0.1
1984-02-16	Dharwad	18.91	31.56	0
1984-02-17	Dharwad	19.57	32.47	0
1984-02-18	Dharwad	19.3	32.64	0
1984-02-19	Dharwad	17.6	32.95	0
1984-02-20	Dharwad	17.69	32.89	0
1984-02-21	Dharwad	18.27	32.42	0
1984-02-22	Dharwad	19.16	32.55	0
1984-02-23	Dharwad	20.85	33.99	0
1984-02-24	Dharwad	21.07	34.32	0
1984-02-25	Dharwad	20.92	33.86	0
1984-02-26	Dharwad	21.22	34.58	0
1984-02-27	Dharwad	18.71	34.16	0
1984-02-28	Dharwad	17.65	35	0
1984-02-29	Dharwad	18.04	34.7	0
1984-03-01	Dharwad	17.6	35.39	0
1984-03-02	Dharwad	18.64	35.54	0
1984-03-03	Dharwad	18.39	35.59	0
1984-03-04	Dharwad	19.61	34.69	0
1984-03-05	Dharwad	20.91	33.24	0
1984-03-06	Dharwad	19.09	32.57	0
1984-03-07	Dharwad	19.97	32.11	0
1984-03-08	Dharwad	21.43	33.79	0.8
1984-03-09	Dharwad	21.6	31.75	0
1984-03-10	Dharwad	22.43	34.07	0
1984-03-11	Dharwad	21.48	34.58	4.5
1984-03-12	Dharwad	20.69	34.28	0
1984-03-13	Dharwad	21.05	34.66	0
1984-03-14	Dharwad	21.18	35.33	0
1984-03-15	Dharwad	20.99	34.74	0
1984-03-16	Dharwad	22.16	35.19	0
1984-03-17	Dharwad	22.64	35.92	0
1984-03-18	Dharwad	21.85	36.36	0
1984-03-19	Dharwad	22.17	36.33	0
1984-03-20	Dharwad	22.55	36.48	0
1984-03-21	Dharwad	22.85	36.52	0
1984-03-22	Dharwad	22.39	36.76	0
1984-03-23	Dharwad	22.48	36.51	0
1984-03-24	Dharwad	21.5	36.19	1.1
1984-03-25	Dharwad	21.96	35.98	0
1984-03-26	Dharwad	22.35	35.2	1.6
1984-03-27	Dharwad	21.81	35.1	0
1984-03-28	Dharwad	22.72	35.76	0
1984-03-29	Dharwad	23.52	36.33	0
1984-03-30	Dharwad	23.57	36.44	0
1984-03-31	Dharwad	23.23	36.58	0
1984-04-01	Dharwad	24.27	36.8	0
1984-04-02	Dharwad	23.79	37.17	0
1984-04-03	Dharwad	23.97	37.5	0
1984-04-04	Dharwad	23.81	37.32	0
1984-04-05	Dharwad	22.39	36.98	4.9
1984-04-06	Dharwad	23.2	35.59	0
1984-04-07	Dharwad	22.67	36.25	0
1984-04-08	Dharwad	22.39	35.81	0
1984-04-09	Dharwad	22.11	35.3	0
1984-04-10	Dharwad	21.86	35.95	0
1984-04-11	Dharwad	22.76	36.46	0
1984-04-12	Dharwad	21.63	36.05	0
1984-04-13	Dharwad	22.88	35.3	0.7
1984-04-14	Dharwad	23.87	36.22	0
1984-04-15	Dharwad	22.55	36.5	0
1984-04-16	Dharwad	23.64	36.7	0
1984-04-17	Dharwad	23.08	36.41	0
1984-04-18	Dharwad	23.93	36.95	0
1984-04-19	Dharwad	24.24	36.81	0
1984-04-20	Dharwad	24.38	36.75	1.8
1984-04-21	Dharwad	23.51	36.01	0
1984-04-22	Dharwad	23.24	37.11	0
1984-04-23	Dharwad	23	37.04	0
1984-04-24	Dharwad	22.45	37.13	0
1984-04-25	Dharwad	22.73	36.94	0
1984-04-26	Dharwad	22.27	35.98	0
1984-04-27	Dharwad	23.23	36.03	0
1984-04-28	Dharwad	24.09	36.51	0
1984-04-29	Dharwad	23.04	36.41	0
1984-04-30	Dharwad	22.3	36.55	0
1984-05-01	Dharwad	22.54	36.93	0
1984-05-02	Dharwad	24.01	37.29	0
1984-05-03	Dharwad	24	37.59	0
1984-05-04	Dharwad	23.84	37.42	0
1984-05-05	Dharwad	24.07	37.48	0
1984-05-06	Dharwad	23.84	37.3	4.3
1984-05-07	Dharwad	23.85	37.5	1.2
1984-05-08	Dharwad	24.04	37.53	0
1984-05-09	Dharwad	23.61	36.95	0
1984-05-10	Dharwad	23.69	37.54	0
1984-05-11	Dharwad	24.3	37.6	0
1984-05-12	Dharwad	24.33	37.97	0
1984-05-13	Dharwad	23.78	37.45	0
1984-05-14	Dharwad	24.09	37.2	0
1984-05-15	Dharwad	23.33	36.57	0
1984-05-16	Dharwad	22.98	37.24	0.2
1984-05-17	Dharwad	24.67	37.62	0
1984-05-18	Dharwad	23.75	38.13	2.3
1984-05-19	Dharwad	24.21	37.35	4.1
1984-05-20	Dharwad	24.43	37.34	0.8
1984-05-21	Dharwad	24.19	35.94	0.9
1984-05-22	Dharwad	24.21	37.36	0
1984-05-23	Dharwad	23.79	36.88	0
1984-05-24	Dharwad	23.89	36.81	0
1984-05-25	Dharwad	24.18	36.63	1.6
1984-05-26	Dharwad	24.13	36.54	0
1984-05-27	Dharwad	24.56	36.89	0
1984-05-28	Dharwad	24.23	35.59	0
1984-05-29	Dharwad	23.85	35.46	0
1984-05-30	Dharwad	24.14	34.88	0
1984-05-31	Dharwad	23.71	35.68	0
1984-06-01	Dharwad	23.5	35.42	0
1984-06-02	Dharwad	23.35	34.78	0
1984-06-03	Dharwad	21.77	34.18	0.7
1984-06-04	Dharwad	21.63	30.5	0
1984-06-05	Dharwad	21.41	31.67	0
1984-06-06	Dharwad	21.87	32.53	0
1984-06-07	Dharwad	22.09	30.5	0
1984-06-08	Dharwad	22.13	29.94	0
1984-06-09	Dharwad	21.25	29.43	1.6
1984-06-10	Dharwad	21.7	29.39	0.2
1984-06-11	Dharwad	22.55	30.66	0
1984-06-12	Dharwad	21.71	31.3	2.1
1984-06-13	Dharwad	22.1	30.46	0.3
1984-06-14	Dharwad	21.36	28.83	14.1
1984-06-15	Dharwad	22.22	29.19	8.7
1984-06-16	Dharwad	22.17	29.56	4.5
1984-06-17	Dharwad	22.07	29.71	5.8
1984-06-18	Dharwad	22.42	29.6	8.1
1984-06-19	Dharwad	22.73	30.09	3.2
1984-06-20	Dharwad	22.49	28.46	0
1984-06-21	Dharwad	22.66	30.15	0.4
1984-06-22	Dharwad	23.21	30.75	0
1984-06-23	Dharwad	23.18	30.89	0
1984-06-24	Dharwad	22.77	31	0
1984-06-25	Dharwad	21.05	31.02	0
1984-06-26	Dharwad	21.16	30.35	0
1984-06-27	Dharwad	21.03	30.03	1.9
1984-06-28	Dharwad	21.99	30.15	0
1984-06-29	Dharwad	21.4	29.25	9.5
1984-06-30	Dharwad	21.41	28.56	8.7
1984-07-01	Dharwad	21.25	27.62	18.7
1984-07-02	Dharwad	21.85	26.92	24.4
1984-07-03	Dharwad	22.11	28.5	1.2
1984-07-04	Dharwad	22.25	28.82	2.4
1984-07-05	Dharwad	21.97	28.82	6.6
1984-07-06	Dharwad	22.41	28.42	4.5
1984-07-07	Dharwad	22.08	29.42	9
1984-07-08	Dharwad	21.62	29.35	0.1
1984-07-09	Dharwad	21.88	30.15	0
1984-07-10	Dharwad	21.5	30.54	0
1984-07-11	Dharwad	21.81	30.62	0
1984-07-12	Dharwad	21.8	29.84	0
1984-07-13	Dharwad	22.06	29.8	7.6
1984-07-14	Dharwad	21.77	28.47	0.4
1984-07-15	Dharwad	20.83	27.88	14.7
1984-07-16	Dharwad	20.5	26.28	12.6
1984-07-17	Dharwad	20.31	26.43	9.4
1984-07-18	Dharwad	20.83	26.31	10.7
1984-07-19	Dharwad	20.9	25.78	11.1
1984-07-20	Dharwad	21.49	27.49	4.3
1984-07-21	Dharwad	21.32	28.63	0.5
1984-07-22	Dharwad	20.89	29.19	0.3
1984-07-23	Dharwad	21.24	28.68	0
1984-07-24	Dharwad	21.18	27.8	0.5
1984-07-25	Dharwad	21.18	28.22	2.3
1984-07-26	Dharwad	20.77	27.39	0
1984-07-27	Dharwad	21.11	26.9	0
1984-07-28	Dharwad	21.21	27.5	0.3
1984-07-29	Dharwad	21.14	27.78	1.8
1984-07-30	Dharwad	21.55	28.98	1.2
1984-07-31	Dharwad	20.85	28.44	0.6
1984-08-01	Dharwad	20.69	25.9	1.7
1984-08-02	Dharwad	20.66	25.23	5.7
1984-08-03	Dharwad	21.41	27.37	0.9
1984-08-04	Dharwad	21.51	27.81	0
1984-08-05	Dharwad	21.05	28.4	0.4
1984-08-06	Dharwad	21.02	28.57	1.3
1984-08-07	Dharwad	20.67	28.07	0.4
1984-08-08	Dharwad	21.22	28.08	0.6
1984-08-09	Dharwad	21.69	28.06	0.8
1984-08-10	Dharwad	21.88	28.03	0.2
1984-08-11	Dharwad	21.41	28.28	1.2
1984-08-12	Dharwad	20.84	28.23	4.1
1984-08-13	Dharwad	21.31	28.24	2
1984-08-14	Dharwad	21.47	28.4	0.8
1984-08-15	Dharwad	21.23	28.46	1.3
1984-08-16	Dharwad	21.52	28.07	1.5
1984-08-17	Dharwad	21.67	28.4	1.3
1984-08-18	Dharwad	21.18	28.33	0.4
1984-08-19	Dharwad	21.15	27.96	4
1984-08-20	Dharwad	21.48	28.28	6
1984-08-21	Dharwad	21.19	28.77	0.6
1984-08-22	Dharwad	21.06	28.36	0
1984-08-23	Dharwad	21.52	29.08	0
1984-08-24	Dharwad	21.44	29.03	0
1984-08-25	Dharwad	21.05	29.24	0
1984-08-26	Dharwad	21.05	28.75	0
1984-08-27	Dharwad	20.86	28.6	0
1984-08-28	Dharwad	21.22	28.24	0.2
1984-08-29	Dharwad	21.13	28.35	0
1984-08-30	Dharwad	20.9	27.79	1.3
1984-08-31	Dharwad	20.75	27.66	8
1984-09-01	Dharwad	20.69	27.78	1.9
1984-09-02	Dharwad	20.89	28.14	0.5
1984-09-03	Dharwad	20.66	28.19	0.3
1984-09-04	Dharwad	20.39	28.63	2.1
1984-09-05	Dharwad	20.43	28.59	0.3
1984-09-06	Dharwad	20.39	29.02	0.2
1984-09-07	Dharwad	20.62	28.94	0
1984-09-08	Dharwad	20.14	29.16	0
1984-09-09	Dharwad	20.59	29.31	0
1984-09-10	Dharwad	20.43	30.6	0
1984-09-11	Dharwad	20.52	29.19	0
1984-09-12	Dharwad	20.41	25.1	9.8
1984-09-13	Dharwad	19.89	27.54	0.5
1984-09-14	Dharwad	19.94	27.22	0.3
1984-09-15	Dharwad	19.99	29.42	0
1984-09-16	Dharwad	20.62	30.28	0
1984-09-17	Dharwad	20.6	30.89	0
1984-09-18	Dharwad	21.1	30.89	0
1984-09-19	Dharwad	20.04	30.57	0
1984-09-20	Dharwad	19.98	30.62	0
1984-09-21	Dharwad	20.4	32.02	50.6
1984-09-22	Dharwad	21.65	30.23	0.4
1984-09-23	Dharwad	21.82	31.56	13.6
1984-09-24	Dharwad	20.8	31.74	13.1
1984-09-25	Dharwad	21.76	30.1	0
1984-09-26	Dharwad	21.64	31.67	0.4
1984-09-27	Dharwad	21.5	30.45	12.7
1984-09-28	Dharwad	20.73	30.61	26.5
1984-09-29	Dharwad	20.61	29.22	14.8
1984-09-30	Dharwad	21.57	29.76	0
1984-10-01	Dharwad	22.18	28.77	0
1984-10-02	Dharwad	21.51	30.97	0
1984-10-03	Dharwad	21.22	31.11	0
1984-10-04	Dharwad	22.44	31.52	0
1984-10-05	Dharwad	22.54	31.19	0
1984-10-06	Dharwad	21.58	31.32	4.7
1984-10-07	Dharwad	21.13	30.46	4.5
1984-10-08	Dharwad	21.22	30.68	34
1984-10-09	Dharwad	20.83	28.91	38.1
1984-10-10	Dharwad	21.2	28.66	6
1984-10-11	Dharwad	20.37	27.82	7.8
1984-10-12	Dharwad	20.42	27.44	20.3
1984-10-13	Dharwad	20.53	29.26	0
1984-10-14	Dharwad	20.29	29.77	0
1984-10-15	Dharwad	19.11	29.35	0
1984-10-16	Dharwad	19.4	29.62	0
1984-10-17	Dharwad	19.88	29.51	0
1984-10-18	Dharwad	19.58	29.42	0
1984-10-19	Dharwad	19.96	29.58	0
1984-10-20	Dharwad	20.57	30.58	0
1984-10-21	Dharwad	21.81	31.15	0
1984-10-22	Dharwad	21.66	30.37	1.7
1984-10-23	Dharwad	20.8	29.93	0
1984-10-24	Dharwad	20.18	29.73	13.2
1984-10-25	Dharwad	20.43	29.56	0
1984-10-26	Dharwad	19.64	30.57	0
1984-10-27	Dharwad	19.39	31.07	0
1984-10-28	Dharwad	19.74	31.53	0
1984-10-29	Dharwad	20.49	31.65	0
1984-10-30	Dharwad	20.43	31.36	0.6
1984-10-31	Dharwad	19.96	31.18	0
1984-11-01	Dharwad	18.49	31.55	0
1984-11-02	Dharwad	18.18	31.31	0
1984-11-03	Dharwad	19.69	31.39	0
1984-11-04	Dharwad	20.03	31.37	0
1984-11-05	Dharwad	20.51	31.57	0
1984-11-06	Dharwad	19.5	31.76	0.3
1984-11-07	Dharwad	20.05	31.91	0
1984-11-08	Dharwad	17.95	32	0
1984-11-09	Dharwad	16.26	32.05	0
1984-11-10	Dharwad	16.75	32.05	0
1984-11-11	Dharwad	17.7	32.25	0
1984-11-12	Dharwad	17.14	30.89	0
1984-11-13	Dharwad	18.53	30.35	0
1984-11-14	Dharwad	18.72	30.41	0
1984-11-15	Dharwad	17.69	31.72	0
1984-11-16	Dharwad	19.25	30.87	0
1984-11-17	Dharwad	19.53	30.41	0
1984-11-18	Dharwad	18.87	31.26	0
1984-11-19	Dharwad	17.6	31.08	0
1984-11-20	Dharwad	17.01	30.91	0
1984-11-21	Dharwad	15.6	30.96	0
1984-11-22	Dharwad	15.41	31.1	0
1984-11-23	Dharwad	15.47	30.41	0
1984-11-24	Dharwad	16.23	30.21	0
1984-11-25	Dharwad	16.46	29.86	0
1984-11-26	Dharwad	15.85	29.67	0
1984-11-27	Dharwad	16	29.4	0
1984-11-28	Dharwad	14.97	29.57	0
1984-11-29	Dharwad	13.88	29.3	0
1984-11-30	Dharwad	13.44	29.69	0
1984-12-01	Dharwad	14.14	29.32	0
1984-12-02	Dharwad	17.26	27.96	0
1984-12-03	Dharwad	19.21	28.87	0
1984-12-04	Dharwad	19.68	30.46	0
1984-12-05	Dharwad	19.75	30.74	0
1984-12-06	Dharwad	18.87	31.04	0
1984-12-07	Dharwad	18.75	31.51	0
1984-12-08	Dharwad	18.32	31	0
1984-12-09	Dharwad	17.44	31.01	0
1984-12-10	Dharwad	17.3	30.75	0
1984-12-11	Dharwad	16.29	30.92	0
1984-12-12	Dharwad	15.39	31.42	0
1984-12-13	Dharwad	14.58	31.53	0
1984-12-14	Dharwad	15.34	31.59	0
1984-12-15	Dharwad	16.21	30.58	0
1984-12-16	Dharwad	16.22	30.89	0
1984-12-17	Dharwad	14.73	31.21	0
1984-12-18	Dharwad	14.84	31.22	0
1984-12-19	Dharwad	13.59	31.4	0
1984-12-20	Dharwad	14.43	30.81	0
1984-12-21	Dharwad	14.48	30.2	0
1984-12-22	Dharwad	14.6	30.23	0
1984-12-23	Dharwad	15.1	29.58	0
1984-12-24	Dharwad	14.81	30.04	0
1984-12-25	Dharwad	14.13	29.69	0
1984-12-26	Dharwad	15.19	30.35	0
1984-12-27	Dharwad	15.94	30.48	0
1984-12-28	Dharwad	17.38	31.04	0
1984-12-29	Dharwad	18.44	31.11	0
1984-12-30	Dharwad	18.46	31.82	0
1984-12-31	Dharwad	19.26	31.6	0
1985-01-01	Dharwad	19.36	31.44	0
1985-01-02	Dharwad	18.4	30.62	0
1985-01-03	Dharwad	18.75	31.03	0
1985-01-04	Dharwad	17.57	31.59	0
1985-01-05	Dharwad	16.95	31.14	0
1985-01-06	Dharwad	17.47	32.07	0
1985-01-07	Dharwad	18.28	31.71	0
1985-01-08	Dharwad	18.03	31.35	0
1985-01-09	Dharwad	18.05	31.59	0
1985-01-10	Dharwad	19.15	31.8	0
1985-01-11	Dharwad	18.34	31.38	0
1985-01-12	Dharwad	18.34	30.35	0
1985-01-13	Dharwad	17.83	30.34	0
1985-01-14	Dharwad	17.86	30.1	0
1985-01-15	Dharwad	17.5	30.17	0
1985-01-16	Dharwad	17.52	31.15	0
1985-01-17	Dharwad	17.22	32.01	0
1985-01-18	Dharwad	17.77	32.57	0
1985-01-19	Dharwad	17.94	31.67	0
1985-01-20	Dharwad	17.1	31.7	0
1985-01-21	Dharwad	16.59	31.69	0
1985-01-22	Dharwad	17	30.95	0
1985-01-23	Dharwad	15.88	31.15	0
1985-01-24	Dharwad	16.14	31.67	0
1985-01-25	Dharwad	16.65	32.54	0
1985-01-26	Dharwad	17.3	31.93	0
1985-01-27	Dharwad	17.23	32.16	0
1985-01-28	Dharwad	17.59	32.26	0
1985-01-29	Dharwad	17.42	32.54	0
1985-01-30	Dharwad	17.67	32.29	0
1985-01-31	Dharwad	16.87	32.77	0
1985-02-01	Dharwad	16.69	32.65	0
1985-02-02	Dharwad	17.43	32.52	0
1985-02-03	Dharwad	17.83	33.28	0
1985-02-04	Dharwad	17.55	33.61	0
1985-02-05	Dharwad	17.77	32.98	0
1985-02-06	Dharwad	17.07	33.82	0
1985-02-07	Dharwad	16.93	32.7	0
1985-02-08	Dharwad	16.03	31.12	0
1985-02-09	Dharwad	16.34	32.26	0
1985-02-10	Dharwad	16.83	31.2	0
1985-02-11	Dharwad	16.14	31.58	0
1985-02-12	Dharwad	16.5	31.71	0
1985-02-13	Dharwad	17.72	31.92	0
1985-02-14	Dharwad	17.98	32.32	0
1985-02-15	Dharwad	17.68	32.47	0
1985-02-16	Dharwad	17.58	32.81	0
1985-02-17	Dharwad	18.06	33.45	0
1985-02-18	Dharwad	19.23	33.53	0
1985-02-19	Dharwad	20.22	33.6	0
1985-02-20	Dharwad	19.12	33.29	0
1985-02-21	Dharwad	19.13	33.43	0
1985-02-22	Dharwad	19.88	33.76	0
1985-02-23	Dharwad	18.78	33.36	0
1985-02-24	Dharwad	17.94	34.11	0
1985-02-25	Dharwad	18.25	34.15	0
1985-02-26	Dharwad	18.56	34.37	0
1985-02-27	Dharwad	18.36	34.63	0
1985-02-28	Dharwad	18.81	34.99	0
1985-03-01	Dharwad	19.55	35.01	0
1985-03-02	Dharwad	19.66	35.45	0
1985-03-03	Dharwad	20.27	35.36	0
1985-03-04	Dharwad	19.56	35.53	0
1985-03-05	Dharwad	20.21	36.15	0
1985-03-06	Dharwad	20.57	35.51	0
1985-03-07	Dharwad	21.1	36.01	0
1985-03-08	Dharwad	22.06	36.46	0
1985-03-09	Dharwad	21.71	36.56	0
1985-03-10	Dharwad	20.57	36.48	0
1985-03-11	Dharwad	21.21	36.64	0
1985-03-12	Dharwad	20.92	37.22	0
1985-03-13	Dharwad	20.75	37.11	0
1985-03-14	Dharwad	21.12	36.24	0
1985-03-15	Dharwad	20.82	35.92	0
1985-03-16	Dharwad	21.56	36.38	0
1985-03-17	Dharwad	21.65	36.63	0
1985-03-18	Dharwad	21.81	36.03	0
1985-03-19	Dharwad	21.88	36.31	0
1985-03-20	Dharwad	21.64	36.43	0
1985-03-21	Dharwad	21.44	37	0
1985-03-22	Dharwad	23.27	37	0
1985-03-23	Dharwad	22.15	37.18	0
1985-03-24	Dharwad	21.98	35.72	0
1985-03-25	Dharwad	21	36.13	0
1985-03-26	Dharwad	21.5	36.68	0
1985-03-27	Dharwad	22.58	36.86	0
1985-03-28	Dharwad	22.24	36.68	4.9
1985-03-29	Dharwad	23.1	36.84	15.5
1985-03-30	Dharwad	23.52	36.24	0.9
1985-03-31	Dharwad	21.99	35	3.3
1985-04-01	Dharwad	21.32	35.06	0
1985-04-02	Dharwad	21.03	34.51	0.9
1985-04-03	Dharwad	22.3	35.53	0
1985-04-04	Dharwad	23.02	36.2	0
1985-04-05	Dharwad	21.97	36.21	0
1985-04-06	Dharwad	21.4	36.05	0
1985-04-07	Dharwad	21.29	34.58	0
1985-04-08	Dharwad	21.66	35.82	0
1985-04-09	Dharwad	22.1	36.13	0
1985-04-10	Dharwad	22.33	36.97	0
1985-04-11	Dharwad	23.05	36.91	0
1985-04-12	Dharwad	23.12	37.48	0
1985-04-13	Dharwad	22.28	37.35	0
1985-04-14	Dharwad	22.5	37.39	0
1985-04-15	Dharwad	22.31	36.84	0
1985-04-16	Dharwad	22.64	36.32	0
1985-04-17	Dharwad	22.23	37.02	0
1985-04-18	Dharwad	22.27	37.76	0
1985-04-19	Dharwad	22.88	37.63	0
1985-04-20	Dharwad	22.9	37.35	1.3
1985-04-21	Dharwad	24.02	37.68	2.6
1985-04-22	Dharwad	24.03	38.08	16.2
1985-04-23	Dharwad	24.05	37.1	2.5
1985-04-24	Dharwad	23.05	36.28	0.6
1985-04-25	Dharwad	22.54	36.91	9.1
1985-04-26	Dharwad	22.86	37.41	0
1985-04-27	Dharwad	22.88	37.21	0
1985-04-28	Dharwad	23.33	37.93	0
1985-04-29	Dharwad	24.04	38.46	0
1985-04-30	Dharwad	23.54	38.29	0
1985-05-01	Dharwad	22.32	37.74	0
1985-05-02	Dharwad	21.7	36.21	0
1985-05-03	Dharwad	21.54	35.93	0
1985-05-04	Dharwad	21.5	35.54	0
1985-05-05	Dharwad	21.88	35.88	0
1985-05-06	Dharwad	21.91	36.56	0
1985-05-07	Dharwad	23.1	36.82	0.2
1985-05-08	Dharwad	24.83	37.42	0
1985-05-09	Dharwad	23.73	37.69	0
1985-05-10	Dharwad	22.07	37.3	3.6
1985-05-11	Dharwad	23.88	36.67	0.2
1985-05-12	Dharwad	23.88	37.47	0
1985-05-13	Dharwad	23.04	37.08	40.4
1985-05-14	Dharwad	23.69	37.27	0
1985-05-15	Dharwad	23.88	37.28	0
1985-05-16	Dharwad	24.19	36.74	0
1985-05-17	Dharwad	24.84	37.04	0.6
1985-05-18	Dharwad	24.95	37.02	0
1985-05-19	Dharwad	23.25	36.97	16.2
1985-05-20	Dharwad	22.36	36.85	23.3
1985-05-21	Dharwad	23.16	35.5	0.4
1985-05-22	Dharwad	23.25	33.72	0
1985-05-23	Dharwad	23.77	34.58	0
1985-05-24	Dharwad	23.22	36.01	0
1985-05-25	Dharwad	23.38	34.76	0
1985-05-26	Dharwad	23.63	34.82	0
1985-05-27	Dharwad	23.48	34.59	0
1985-05-28	Dharwad	23.11	34.52	0
1985-05-29	Dharwad	22.67	33.37	0
1985-05-30	Dharwad	22.68	32.82	0
1985-05-31	Dharwad	22.19	32.9	0
1985-06-01	Dharwad	22.6	33.13	0
1985-06-02	Dharwad	22.1	32.92	0
1985-06-03	Dharwad	22.09	31.44	0.2
1985-06-04	Dharwad	22.15	32.13	0.6
1985-06-05	Dharwad	23.11	32.96	0
1985-06-06	Dharwad	22.89	32.78	0
1985-06-07	Dharwad	21.29	29.73	4.5
1985-06-08	Dharwad	21.66	29.25	5.1
1985-06-09	Dharwad	22.28	31.11	2.3
1985-06-10	Dharwad	21.93	31.89	2.2
1985-06-11	Dharwad	21.67	29.48	5.4
1985-06-12	Dharwad	21.69	30.8	0.2
1985-06-13	Dharwad	21.28	29.09	0
1985-06-14	Dharwad	22.05	31.55	0
1985-06-15	Dharwad	21.63	29.95	0
1985-06-16	Dharwad	21.35	29.66	1.3
1985-06-17	Dharwad	21.44	28.67	13.4
1985-06-18	Dharwad	21.25	28.45	15.4
1985-06-19	Dharwad	21.41	28.24	0.5
1985-06-20	Dharwad	20.73	30.33	0
1985-06-21	Dharwad	20.94	29.48	0
1985-06-22	Dharwad	21.78	30.52	0
1985-06-23	Dharwad	22.16	31.31	0
1985-06-24	Dharwad	21.34	30.94	0
1985-06-25	Dharwad	20.15	28.37	0.6
1985-06-26	Dharwad	20.68	27.66	6.6
1985-06-27	Dharwad	20.71	25.78	21.1
1985-06-28	Dharwad	21.71	27.67	5.3
1985-06-29	Dharwad	22.28	27.99	0
1985-06-30	Dharwad	21.91	28.52	0.6
1985-07-01	Dharwad	22.02	29.37	0.7
1985-07-02	Dharwad	21.89	29.67	7.5
1985-07-03	Dharwad	21.59	28.94	4.6
1985-07-04	Dharwad	22.18	29.09	1.5
1985-07-05	Dharwad	22.47	29.78	0
1985-07-06	Dharwad	21.96	29.71	0.3
1985-07-07	Dharwad	21.79	29.89	0.9
1985-07-08	Dharwad	22.17	29.7	3.5
1985-07-09	Dharwad	22.8	29.26	3.3
1985-07-10	Dharwad	22.71	28.65	6.5
1985-07-11	Dharwad	22.61	29.03	0.4
1985-07-12	Dharwad	22.65	29.88	0
1985-07-13	Dharwad	21.93	29.62	0
1985-07-14	Dharwad	21.48	29.85	0
1985-07-15	Dharwad	21.88	30.31	0
1985-07-16	Dharwad	21.64	29.3	0
1985-07-17	Dharwad	21.54	29.16	0.3
1985-07-18	Dharwad	20.86	28.26	10.3
1985-07-19	Dharwad	20.64	28.06	10.3
1985-07-20	Dharwad	20.86	27.21	0
1985-07-21	Dharwad	21.05	29.01	3.5
1985-07-22	Dharwad	21.27	27.99	2
1985-07-23	Dharwad	21.27	28.1	0.8
1985-07-24	Dharwad	20.77	27.07	26.2
1985-07-25	Dharwad	20.99	26.88	0.1
1985-07-26	Dharwad	20.56	26.59	28.5
1985-07-27	Dharwad	20.87	26.47	9.2
1985-07-28	Dharwad	20.93	26.94	0.8
1985-07-29	Dharwad	21.36	28.13	2.1
1985-07-30	Dharwad	21.32	28.47	0
1985-07-31	Dharwad	20.68	27.33	13
1985-08-01	Dharwad	20.88	26.24	27.1
1985-08-02	Dharwad	20.5	25.59	24.7
1985-08-03	Dharwad	21.26	26.11	18.4
1985-08-04	Dharwad	21.38	28.21	0.9
1985-08-05	Dharwad	21.55	28.71	0.4
1985-08-06	Dharwad	21.63	27.91	0
1985-08-07	Dharwad	21.59	27.92	10.2
1985-08-08	Dharwad	21.47	28.63	2.6
1985-08-09	Dharwad	21	27.41	6
1985-08-10	Dharwad	21.62	28.28	0.7
1985-08-11	Dharwad	21.71	28.6	0.9
1985-08-12	Dharwad	21.85	29.14	0.5
1985-08-13	Dharwad	21.36	29.25	0.4
1985-08-14	Dharwad	21.13	27.8	1.1
1985-08-15	Dharwad	20.63	26.71	1.4
1985-08-16	Dharwad	21.58	27.92	0.3
1985-08-17	Dharwad	21.29	28.53	0
1985-08-18	Dharwad	20.96	28.89	0.1
1985-08-19	Dharwad	21.53	29.57	0
1985-08-20	Dharwad	21.33	27.7	1.7
1985-08-21	Dharwad	20.95	29.04	0
1985-08-22	Dharwad	21.28	29.76	0
1985-08-23	Dharwad	21.51	30.12	0
1985-08-24	Dharwad	21.3	29.78	0
1985-08-25	Dharwad	21.24	29.41	0.2
1985-08-26	Dharwad	21.32	28.69	0.8
1985-08-27	Dharwad	21.09	28.98	0
1985-08-28	Dharwad	20.93	28.65	0
1985-08-29	Dharwad	20.78	28.42	0
1985-08-30	Dharwad	21.16	29.35	0
1985-08-31	Dharwad	20.7	29.29	0
1985-09-01	Dharwad	21.14	29.82	0
1985-09-02	Dharwad	21.55	30.8	0
1985-09-03	Dharwad	20.78	30.73	0
1985-09-04	Dharwad	21.13	30.86	0
1985-09-05	Dharwad	21.08	29.94	0
1985-09-06	Dharwad	21.42	29.66	0.6
1985-09-07	Dharwad	21.35	28.47	1.2
1985-09-08	Dharwad	20.52	28.93	0.3
1985-09-09	Dharwad	20.84	29.38	1
1985-09-10	Dharwad	21.32	29.89	0
1985-09-11	Dharwad	21.15	29.31	0.9
1985-09-12	Dharwad	20.83	29.14	0.1
1985-09-13	Dharwad	20.74	29.66	0
1985-09-14	Dharwad	20.96	29.96	0
1985-09-15	Dharwad	20.13	30.4	0
1985-09-16	Dharwad	20.89	30.43	10.7
1985-09-17	Dharwad	20.62	30.54	0
1985-09-18	Dharwad	20.64	30.98	0
1985-09-19	Dharwad	21.06	31.49	0
1985-09-20	Dharwad	20.68	31.65	0
1985-09-21	Dharwad	20.59	31.76	0
1985-09-22	Dharwad	20.39	31.45	0
1985-09-23	Dharwad	20.47	31.95	0
1985-09-24	Dharwad	21.14	31.95	0
1985-09-25	Dharwad	21.68	32.17	0
1985-09-26	Dharwad	22.03	31.88	4.6
1985-09-27	Dharwad	22.22	32.97	1
1985-09-28	Dharwad	21.92	32.73	8.5
1985-09-29	Dharwad	21.91	31.64	15.2
1985-09-30	Dharwad	20.81	31.96	7.8
1985-10-01	Dharwad	20.81	31.63	11
1985-10-02	Dharwad	21.05	30.64	0
1985-10-03	Dharwad	21.28	28.67	15.7
1985-10-04	Dharwad	21.23	28.12	55.8
1985-10-05	Dharwad	21.67	28.44	20.9
1985-10-06	Dharwad	21.26	28.4	1.7
1985-10-07	Dharwad	20.88	28.26	0
1985-10-08	Dharwad	20.97	28.75	4.3
1985-10-09	Dharwad	20.69	26.38	6.3
1985-10-10	Dharwad	20.67	28.15	18.4
1985-10-11	Dharwad	21.05	29.95	0
1985-10-12	Dharwad	21.08	29.47	0
1985-10-13	Dharwad	19.77	29.79	0
1985-10-14	Dharwad	19.39	30.23	0
1985-10-15	Dharwad	19.8	30.43	0
1985-10-16	Dharwad	19.47	29.93	0
1985-10-17	Dharwad	20.27	29.56	0
1985-10-18	Dharwad	20.42	29.62	0
1985-10-19	Dharwad	20.8	30.37	0.6
1985-10-20	Dharwad	20.44	28.82	0.3
1985-10-21	Dharwad	20.37	30.63	0
1985-10-22	Dharwad	19.14	31.09	0
1985-10-23	Dharwad	17.23	31.58	0
1985-10-24	Dharwad	16.76	31.52	0
1985-10-25	Dharwad	16.85	31.92	0
1985-10-26	Dharwad	18.21	31.81	0
1985-10-27	Dharwad	18.73	32.16	0
1985-10-28	Dharwad	18.46	32.05	0
1985-10-29	Dharwad	17.44	31.93	0
1985-10-30	Dharwad	17.36	31.91	0
1985-10-31	Dharwad	17.7	31.95	0
1985-11-01	Dharwad	17.48	32.18	0
1985-11-02	Dharwad	17.46	31.85	0
1985-11-03	Dharwad	17.74	31.02	0
1985-11-04	Dharwad	19.07	31.14	0
1985-11-05	Dharwad	19.78	31.04	0
1985-11-06	Dharwad	20.28	31.13	0
1985-11-07	Dharwad	21.31	31.57	0
1985-11-08	Dharwad	20.39	31.07	0.7
1985-11-09	Dharwad	19.97	30.52	1.5
1985-11-10	Dharwad	19.45	30.86	0
1985-11-11	Dharwad	18.35	31.2	0
1985-11-12	Dharwad	17.72	31.03	0
1985-11-13	Dharwad	18.38	30.69	0
1985-11-14	Dharwad	17.31	30.95	0
1985-11-15	Dharwad	15.97	30.89	0
1985-11-16	Dharwad	15.1	30.97	0
1985-11-17	Dharwad	15.84	30.92	0
1985-11-18	Dharwad	15.32	30.62	0
1985-11-19	Dharwad	16.41	31.36	0
1985-11-20	Dharwad	16.53	30.88	0
1985-11-21	Dharwad	16.36	31.03	0
1985-11-22	Dharwad	16.48	31.28	0
1985-11-23	Dharwad	16.66	31.31	0
1985-11-24	Dharwad	16.94	31.32	0
1985-11-25	Dharwad	17.56	31.13	0
1985-11-26	Dharwad	16.8	30.94	0
1985-11-27	Dharwad	16.52	30.94	0
1985-11-28	Dharwad	16.12	30.96	0
1985-11-29	Dharwad	15.81	30.88	0
1985-11-30	Dharwad	14.84	30.53	0
1985-12-01	Dharwad	14.5	30.22	0
1985-12-02	Dharwad	17.57	31.17	0
1985-12-03	Dharwad	19.64	31.86	0
1985-12-04	Dharwad	19.24	31.35	0
1985-12-05	Dharwad	18.98	31.99	0
1985-12-06	Dharwad	17.48	31.59	0
1985-12-07	Dharwad	16.6	31.34	0
1985-12-08	Dharwad	17.56	30.14	0
1985-12-09	Dharwad	17.32	30.98	0
1985-12-10	Dharwad	17.85	31.06	0
1985-12-11	Dharwad	18.62	30.85	0
1985-12-12	Dharwad	19.04	29.6	0
1985-12-13	Dharwad	17.04	29.83	0
1985-12-14	Dharwad	18.21	30.51	0
1985-12-15	Dharwad	18.79	29.85	0
1985-12-16	Dharwad	18.44	30	0
1985-12-17	Dharwad	18.22	30.9	0
1985-12-18	Dharwad	18.01	31.99	0
1985-12-19	Dharwad	17.24	31.03	0
1985-12-20	Dharwad	17.08	31.95	0
1985-12-21	Dharwad	18.45	31.64	0
1985-12-22	Dharwad	17.71	31.68	0
1985-12-23	Dharwad	16.64	30.88	0
1985-12-24	Dharwad	16.85	31.17	0
1985-12-25	Dharwad	16.56	31.03	0
1985-12-26	Dharwad	15.98	30.53	0
1985-12-27	Dharwad	16.88	31.3	0
1985-12-28	Dharwad	16.59	32.03	0
1985-12-29	Dharwad	17.09	32.06	0
1985-12-30	Dharwad	17.36	31.73	0
1985-12-31	Dharwad	16.48	31.91	0
1986-01-01	Dharwad	15.5	30.97	0
1986-01-02	Dharwad	15.7	31.13	0
1986-01-03	Dharwad	15.92	30.95	0
1986-01-04	Dharwad	15.4	30.3	0
1986-01-05	Dharwad	15.08	30.07	0
1986-01-06	Dharwad	14.83	30.3	0
1986-01-07	Dharwad	15.18	30.33	0
1986-01-08	Dharwad	15.51	30.35	0
1986-01-09	Dharwad	15.66	30.54	0
1986-01-10	Dharwad	16.63	30.64	0
1986-01-11	Dharwad	16.75	31.13	0
1986-01-12	Dharwad	16.84	30.25	0
1986-01-13	Dharwad	17.62	30.93	0
1986-01-14	Dharwad	19.04	30.5	0
1986-01-15	Dharwad	18.79	27.5	0
1986-01-16	Dharwad	16.53	25.95	0
1986-01-17	Dharwad	15.11	28.19	0
1986-01-18	Dharwad	14.17	29	0
1986-01-19	Dharwad	15.73	29.87	0
1986-01-20	Dharwad	17.32	30.06	0
1986-01-21	Dharwad	17.02	29.71	0
1986-01-22	Dharwad	17.56	30.08	0
1986-01-23	Dharwad	16.95	31.14	0
1986-01-24	Dharwad	17.22	31.47	0
1986-01-25	Dharwad	17.23	31.64	0
1986-01-26	Dharwad	17.18	31.32	0
1986-01-27	Dharwad	16.41	31.46	0
1986-01-28	Dharwad	15.76	30.89	0
1986-01-29	Dharwad	16.57	30.77	0
1986-01-30	Dharwad	16.87	30.54	0
1986-01-31	Dharwad	15.94	29.41	0
1986-02-01	Dharwad	15.49	29.86	0
1986-02-02	Dharwad	15.76	30.45	0
1986-02-03	Dharwad	16.47	30.43	0
1986-02-04	Dharwad	17.58	32	0
1986-02-05	Dharwad	18.19	32.44	0
1986-02-06	Dharwad	18.04	32.1	0
1986-02-07	Dharwad	17.45	32.67	0
1986-02-08	Dharwad	17.35	32.15	0
1986-02-09	Dharwad	17.98	31.11	0
1986-02-10	Dharwad	17.28	31.19	0
1986-02-11	Dharwad	16.91	31.34	0
1986-02-12	Dharwad	17.48	31.01	0
1986-02-13	Dharwad	18.25	30.85	0
1986-02-14	Dharwad	18.22	30.66	0
1986-02-15	Dharwad	16.35	30.59	0
1986-02-16	Dharwad	15.4	31.03	0
1986-02-17	Dharwad	15.19	30.51	0
1986-02-18	Dharwad	15.69	31.39	0
1986-02-19	Dharwad	18.46	32.24	0
1986-02-20	Dharwad	19.33	32.9	0
1986-02-21	Dharwad	19.69	32.64	0.3
1986-02-22	Dharwad	20.06	32.56	0
1986-02-23	Dharwad	19.97	32.54	0
1986-02-24	Dharwad	18.72	33.15	0
1986-02-25	Dharwad	18.67	33.54	0
1986-02-26	Dharwad	19.58	33.37	0
1986-02-27	Dharwad	19.28	33.83	0
1986-02-28	Dharwad	19.35	33.66	0
1986-03-01	Dharwad	19.26	33.94	0
1986-03-02	Dharwad	19.46	34.15	0
1986-03-03	Dharwad	18.23	33.43	0
1986-03-04	Dharwad	19.14	33.47	0
1986-03-05	Dharwad	20.22	33.49	0
1986-03-06	Dharwad	20.88	33.81	0
1986-03-07	Dharwad	20.9	34.77	0
1986-03-08	Dharwad	21.49	34.95	0
1986-03-09	Dharwad	21.83	35.04	0
1986-03-10	Dharwad	21.6	35.07	0
1986-03-11	Dharwad	21.25	35.6	0
1986-03-12	Dharwad	22.27	36.16	0
1986-03-13	Dharwad	22.08	35.21	0
1986-03-14	Dharwad	22.3	35.72	0
1986-03-15	Dharwad	22.38	36.07	0
1986-03-16	Dharwad	22.75	36.46	0
1986-03-17	Dharwad	21.74	36.85	0
1986-03-18	Dharwad	21.87	35.88	0
1986-03-19	Dharwad	21.27	36.16	0
1986-03-20	Dharwad	21.58	35.89	0
1986-03-21	Dharwad	21.38	36.49	0
1986-03-22	Dharwad	21.62	36.34	0
1986-03-23	Dharwad	22.32	37.12	0
1986-03-24	Dharwad	21.38	36.53	0
1986-03-25	Dharwad	21.19	36.21	0
1986-03-26	Dharwad	22.41	36.43	0
1986-03-27	Dharwad	22.54	37.38	0
1986-03-28	Dharwad	22.14	37.31	0
1986-03-29	Dharwad	23.15	37.34	0
1986-03-30	Dharwad	22.25	36.69	0
1986-03-31	Dharwad	21.42	35.86	0
1986-04-01	Dharwad	21.14	36.04	0
1986-04-02	Dharwad	20.61	36.67	0
1986-04-03	Dharwad	21.56	35.98	0
1986-04-04	Dharwad	22.37	36.99	0.3
1986-04-05	Dharwad	22.62	37.01	0
1986-04-06	Dharwad	22.51	37.46	0
1986-04-07	Dharwad	22.63	37.29	0
1986-04-08	Dharwad	23.01	37.28	0
1986-04-09	Dharwad	23.58	37.31	0
1986-04-10	Dharwad	23.01	37.21	0
1986-04-11	Dharwad	24.23	37.47	0.7
1986-04-12	Dharwad	23.91	37.74	1.1
1986-04-13	Dharwad	24.04	37.01	9
1986-04-14	Dharwad	24.57	37.57	0
1986-04-15	Dharwad	24.36	37.52	1.5
1986-04-16	Dharwad	24.61	37.68	8.8
1986-04-17	Dharwad	24.44	38.22	6.3
1986-04-18	Dharwad	22.75	37.56	0
1986-04-19	Dharwad	22.81	37.54	0
1986-04-20	Dharwad	24.09	38.02	0
1986-04-21	Dharwad	22.83	38	0.7
1986-04-22	Dharwad	23.75	37.88	2.7
1986-04-23	Dharwad	22.71	37.24	27.7
1986-04-24	Dharwad	22.79	37.33	2
1986-04-25	Dharwad	22.84	37.24	0
1986-04-26	Dharwad	23.46	37.34	0
1986-04-27	Dharwad	23.98	37.34	16.8
1986-04-28	Dharwad	22.56	37.33	0
1986-04-29	Dharwad	21.85	36.37	0
1986-04-30	Dharwad	23.02	36.34	0
1986-05-01	Dharwad	24.08	36.17	0
1986-05-02	Dharwad	23.41	37.24	2.8
1986-05-03	Dharwad	23.99	35.85	0
1986-05-04	Dharwad	22.32	36.37	1.7
1986-05-05	Dharwad	23.67	36.66	0
1986-05-06	Dharwad	24.06	37.42	0
1986-05-07	Dharwad	22.94	37.27	0
1986-05-08	Dharwad	22.97	36.91	0
1986-05-09	Dharwad	23.34	36.7	0
1986-05-10	Dharwad	23.12	36.06	0
1986-05-11	Dharwad	23.95	36	0
1986-05-12	Dharwad	23.29	36	0
1986-05-13	Dharwad	23.28	36.88	0
1986-05-14	Dharwad	23.54	37.05	13
1986-05-15	Dharwad	23.91	36.45	0
1986-05-16	Dharwad	23.69	36.11	0
1986-05-17	Dharwad	23.7	35.8	0
1986-05-18	Dharwad	23.65	35.51	0
1986-05-19	Dharwad	24.05	36.07	0
1986-05-20	Dharwad	24.17	35.53	0
1986-05-21	Dharwad	23.84	35.51	0
1986-05-22	Dharwad	22.66	35.38	0
1986-05-23	Dharwad	22.36	36.27	0
1986-05-24	Dharwad	23.12	36.25	0
1986-05-25	Dharwad	23.48	35.97	0
1986-05-26	Dharwad	23.8	36.04	0.5
1986-05-27	Dharwad	23.71	35.88	0
1986-05-28	Dharwad	24.12	36.6	2
1986-05-29	Dharwad	23.6	36.1	0
1986-05-30	Dharwad	22.13	35.98	22.4
1986-05-31	Dharwad	22.18	34.93	29.8
1986-06-01	Dharwad	22.64	34.68	0
1986-06-02	Dharwad	22.82	34.32	0
1986-06-03	Dharwad	23.27	34.18	7.9
1986-06-04	Dharwad	22.13	33.59	1.3
1986-06-05	Dharwad	22.08	33.1	9.6
1986-06-06	Dharwad	22.26	32.94	0
1986-06-07	Dharwad	22.16	32.52	0.5
1986-06-08	Dharwad	23.23	33.48	2.4
1986-06-09	Dharwad	23.07	33.18	0
1986-06-10	Dharwad	22.7	31.23	0
1986-06-11	Dharwad	22.97	33.03	0
1986-06-12	Dharwad	23.16	33.73	0
1986-06-13	Dharwad	24.08	34.26	11.3
1986-06-14	Dharwad	22.54	33.54	9.8
1986-06-15	Dharwad	22.96	32.5	0.9
1986-06-16	Dharwad	22.01	31.48	0.3
1986-06-17	Dharwad	21.31	28.97	3.3
1986-06-18	Dharwad	21.54	27.29	8.7
1986-06-19	Dharwad	21.55	27.65	4.4
1986-06-20	Dharwad	21.54	27.66	4.1
1986-06-21	Dharwad	21.74	28.34	0.9
1986-06-22	Dharwad	21.95	28.51	4.7
1986-06-23	Dharwad	22.22	27.94	1.7
1986-06-24	Dharwad	22.3	29.33	2.3
1986-06-25	Dharwad	22.43	28.58	3.5
1986-06-26	Dharwad	23.02	30.01	0.7
1986-06-27	Dharwad	22.78	29.92	1.9
1986-06-28	Dharwad	22.57	29.68	4.4
1986-06-29	Dharwad	21.8	29.21	11.4
1986-06-30	Dharwad	22.01	28.37	9.1
1986-07-01	Dharwad	22.33	28.52	1.3
1986-07-02	Dharwad	22.01	29.74	0.7
1986-07-03	Dharwad	22.3	30.68	0
1986-07-04	Dharwad	22.9	31.46	0
1986-07-05	Dharwad	22.89	31.24	0
1986-07-06	Dharwad	22.76	30.59	2.5
1986-07-07	Dharwad	22.3	30.7	5.7
1986-07-08	Dharwad	22.35	29.35	1.9
1986-07-09	Dharwad	22.43	29.1	3.5
1986-07-10	Dharwad	22.29	29.44	0
1986-07-11	Dharwad	22.39	30.53	0.6
1986-07-12	Dharwad	22.12	30.11	0
1986-07-13	Dharwad	21.98	30.66	0.5
1986-07-14	Dharwad	21.5	28.81	2.9
1986-07-15	Dharwad	20.91	27.78	10.3
1986-07-16	Dharwad	21.42	26.58	2.2
1986-07-17	Dharwad	21.77	27.5	8.2
1986-07-18	Dharwad	21.25	26.24	16.9
1986-07-19	Dharwad	21	25.97	13.9
1986-07-20	Dharwad	21.79	27.14	4.4
1986-07-21	Dharwad	21.82	28.2	2.9
1986-07-22	Dharwad	21.43	27.23	14.2
1986-07-23	Dharwad	21.73	26.87	1
1986-07-24	Dharwad	22.03	27.95	1
1986-07-25	Dharwad	21.43	28.14	5
1986-07-26	Dharwad	21.42	27.81	1
1986-07-27	Dharwad	21.61	28.64	0.8
1986-07-28	Dharwad	21.47	29.43	0.5
1986-07-29	Dharwad	21.03	29.88	0
1986-07-30	Dharwad	21.27	29.29	0
1986-07-31	Dharwad	21.93	30.22	0
1986-08-01	Dharwad	21.54	29.76	20.3
1986-08-02	Dharwad	21.26	28.25	4.8
1986-08-03	Dharwad	21.16	28.34	0
1986-08-04	Dharwad	20.98	26.56	3.3
1986-08-05	Dharwad	20.73	27	5.4
1986-08-06	Dharwad	21.04	26.02	2.4
1986-08-07	Dharwad	20.91	26.33	7.3
1986-08-08	Dharwad	21.56	25.89	10.7
1986-08-09	Dharwad	21.46	26.65	7.8
1986-08-10	Dharwad	21.11	26.54	9.1
1986-08-11	Dharwad	21.02	25.79	10.2
1986-08-12	Dharwad	20.94	26.11	10.4
1986-08-13	Dharwad	20.94	25.35	8.7
1986-08-14	Dharwad	20.65	25.05	1.3
1986-08-15	Dharwad	20.84	26.53	0.4
1986-08-16	Dharwad	20.89	27.3	0.9
1986-08-17	Dharwad	21.22	28.21	0
1986-08-18	Dharwad	21.45	28.7	0
1986-08-19	Dharwad	21.38	28.46	0
1986-08-20	Dharwad	21.31	28.79	1.8
1986-08-21	Dharwad	21.04	28.51	1.3
1986-08-22	Dharwad	21.09	27.69	3.1
1986-08-23	Dharwad	20.74	28.37	0.2
1986-08-24	Dharwad	20.91	29.19	0
1986-08-25	Dharwad	20.9	30.05	0
1986-08-26	Dharwad	21.69	30.49	0
1986-08-27	Dharwad	20.22	30.1	0
1986-08-28	Dharwad	20.08	30.24	0
1986-08-29	Dharwad	20.5	30.38	0
1986-08-30	Dharwad	20.2	30.39	0
1986-08-31	Dharwad	20.11	30.8	0
1986-09-01	Dharwad	20.15	30.94	0
1986-09-02	Dharwad	20.43	30.88	0
1986-09-03	Dharwad	20.68	31.35	0
1986-09-04	Dharwad	20.15	30.79	0
1986-09-05	Dharwad	20.92	30.56	0.3
1986-09-06	Dharwad	21.43	29.21	1.2
1986-09-07	Dharwad	20.72	29.56	0.4
1986-09-08	Dharwad	20.93	30.16	0
1986-09-09	Dharwad	20.64	29.01	0.2
1986-09-10	Dharwad	20.68	27.96	0
1986-09-11	Dharwad	20.98	29.44	0
1986-09-12	Dharwad	20.78	29.97	0
1986-09-13	Dharwad	20.93	30.72	0
1986-09-14	Dharwad	20.98	30.61	0
1986-09-15	Dharwad	20.82	31.2	0
1986-09-16	Dharwad	20.92	31.66	0
1986-09-17	Dharwad	21.41	31.6	34.7
1986-09-18	Dharwad	21.53	30.23	0
1986-09-19	Dharwad	21.43	30.89	5.3
1986-09-20	Dharwad	21.71	31.05	0.6
1986-09-21	Dharwad	21.91	30.88	10.3
1986-09-22	Dharwad	22.25	30.74	0
1986-09-23	Dharwad	21.81	30.46	9.9
1986-09-24	Dharwad	21.78	30.38	0
1986-09-25	Dharwad	22	30.72	2.4
1986-09-26	Dharwad	22.31	30.56	9.9
1986-09-27	Dharwad	22.34	31.45	23.6
1986-09-28	Dharwad	22.44	31.64	4.1
1986-09-29	Dharwad	22.68	31.7	8.3
1986-09-30	Dharwad	21.63	30.97	11.4
1986-10-01	Dharwad	21.58	31.01	3.6
1986-10-02	Dharwad	21.45	30.36	0.5
1986-10-03	Dharwad	21.01	30.4	0.8
1986-10-04	Dharwad	21.55	30.94	5.7
1986-10-05	Dharwad	22.33	30.56	0
1986-10-06	Dharwad	22.41	31.16	1.8
1986-10-07	Dharwad	22.71	30.51	34.9
1986-10-08	Dharwad	22.45	30.96	0
1986-10-09	Dharwad	21.99	31.6	1.5
1986-10-10	Dharwad	21.36	32.11	14.5
1986-10-11	Dharwad	21.39	32.34	0
1986-10-12	Dharwad	22.19	32.51	0
1986-10-13	Dharwad	22.18	33.05	0
1986-10-14	Dharwad	22.47	33.22	0
1986-10-15	Dharwad	22.22	33.24	0.5
1986-10-16	Dharwad	22.58	32.71	0
1986-10-17	Dharwad	20.97	32.25	0
1986-10-18	Dharwad	19.99	31.77	0
1986-10-19	Dharwad	21.1	32.39	0
1986-10-20	Dharwad	20.38	32.35	0
1986-10-21	Dharwad	19.57	33.58	0
1986-10-22	Dharwad	19.97	33.32	0
1986-10-23	Dharwad	21.79	32.44	0
1986-10-24	Dharwad	20.76	31.6	0
1986-10-25	Dharwad	18.96	32.24	0
1986-10-26	Dharwad	19.23	33.21	0
1986-10-27	Dharwad	20.62	33.12	0
1986-10-28	Dharwad	21.24	32.62	3.8
1986-10-29	Dharwad	20.72	32.21	2.3
1986-10-30	Dharwad	21.23	31.41	0.1
1986-10-31	Dharwad	21.03	29.16	7.4
1986-11-01	Dharwad	20.69	29.96	0
1986-11-02	Dharwad	19.95	30.31	31.3
1986-11-03	Dharwad	20.13	28.27	15
1986-11-04	Dharwad	21.05	29.25	0.2
1986-11-05	Dharwad	21.23	30.13	37.8
1986-11-06	Dharwad	21.02	29.05	19.6
1986-11-07	Dharwad	21.03	27.86	0.5
1986-11-08	Dharwad	20.91	29.58	2.3
1986-11-09	Dharwad	20.78	29.54	0
1986-11-10	Dharwad	21.8	30.31	3.9
1986-11-11	Dharwad	21.52	31.2	0
1986-11-12	Dharwad	21.93	31.51	0
1986-11-13	Dharwad	20.04	30.86	0
1986-11-14	Dharwad	19.01	31.28	0
1986-11-15	Dharwad	19.32	30.94	0
1986-11-16	Dharwad	18.53	31.08	0
1986-11-17	Dharwad	18.87	30.97	0
1986-11-18	Dharwad	18.63	30.42	0
1986-11-19	Dharwad	18.79	30.89	0
1986-11-20	Dharwad	17.34	30.41	0
1986-11-21	Dharwad	17.15	30.35	0
1986-11-22	Dharwad	17.49	30.38	0
1986-11-23	Dharwad	17.78	30.12	0
1986-11-24	Dharwad	17.71	30.48	0
1986-11-25	Dharwad	19.07	30.75	0
1986-11-26	Dharwad	18.49	30.78	0
1986-11-27	Dharwad	17.99	30.99	0
1986-11-28	Dharwad	17.07	30.95	0
1986-11-29	Dharwad	18.04	31.13	0
1986-11-30	Dharwad	18.95	31.91	0
1986-12-01	Dharwad	17.62	31.5	0
1986-12-02	Dharwad	18.05	30.78	0
1986-12-03	Dharwad	18.2	30.55	0
1986-12-04	Dharwad	15.76	30.5	0
1986-12-05	Dharwad	15.07	29.92	0
1986-12-06	Dharwad	15.39	30.16	0
1986-12-07	Dharwad	15.79	30.87	0
1986-12-08	Dharwad	15.63	30.36	0
1986-12-09	Dharwad	17.3	30.88	0
1986-12-10	Dharwad	17.6	31.1	0
1986-12-11	Dharwad	18.01	31.05	0
1986-12-12	Dharwad	17.84	30.3	0
1986-12-13	Dharwad	17.5	30.7	0
1986-12-14	Dharwad	17.76	30.45	0
1986-12-15	Dharwad	17.66	30.42	0
1986-12-16	Dharwad	17.1	30.48	0
1986-12-17	Dharwad	16.1	29.68	0
1986-12-18	Dharwad	16.38	29.91	0
1986-12-19	Dharwad	15.52	29.25	0
1986-12-20	Dharwad	16.92	29.53	0
1986-12-21	Dharwad	17.23	31.2	0
1986-12-22	Dharwad	17.71	31.66	0
1986-12-23	Dharwad	17.41	31.57	0
1986-12-24	Dharwad	18.87	31.19	0
1986-12-25	Dharwad	18.17	30.69	0
1986-12-26	Dharwad	18.33	30.01	0
1986-12-27	Dharwad	19.02	29.53	0
1986-12-28	Dharwad	16.7	26.38	0
1986-12-29	Dharwad	16.95	29.55	0
1986-12-30	Dharwad	16.92	29.49	0
1986-12-31	Dharwad	16.97	30.33	0
1987-01-01	Dharwad	16.65	30.22	0
1987-01-02	Dharwad	15.18	31.09	0
1987-01-03	Dharwad	15.23	30.34	0
1987-01-04	Dharwad	14.98	30.5	0
1987-01-05	Dharwad	14.52	29.72	0
1987-01-06	Dharwad	14.8	29.61	0
1987-01-07	Dharwad	16	29.47	0
1987-01-08	Dharwad	15.84	29.6	0
1987-01-09	Dharwad	15.55	29.11	0
1987-01-10	Dharwad	15.28	29.27	0
1987-01-11	Dharwad	15.61	29.48	0
1987-01-12	Dharwad	15.06	29.32	0
1987-01-13	Dharwad	16.7	30.25	0
1987-01-14	Dharwad	17.2	30.28	0
1987-01-15	Dharwad	17.27	30.66	0
1987-01-16	Dharwad	17.5	31.28	0
1987-01-17	Dharwad	17.15	30.67	0
1987-01-18	Dharwad	17.55	31.48	0
1987-01-19	Dharwad	17.33	31.4	0
1987-01-20	Dharwad	16.85	31.62	0
1987-01-21	Dharwad	18.22	31.24	0
1987-01-22	Dharwad	19.07	31.55	0
1987-01-23	Dharwad	19.06	31.25	0
1987-01-24	Dharwad	18.55	32.04	0
1987-01-25	Dharwad	18.54	31.97	0
1987-01-26	Dharwad	17.43	31.8	0
1987-01-27	Dharwad	17.09	32.61	0
1987-01-28	Dharwad	15.85	32.31	0
1987-01-29	Dharwad	15.47	31.81	0
1987-01-30	Dharwad	14.95	32.36	0
1987-01-31	Dharwad	15.54	32.31	0
1987-02-01	Dharwad	15.56	32.33	0
1987-02-02	Dharwad	16.59	31.91	0
1987-02-03	Dharwad	16.39	31.95	0
1987-02-04	Dharwad	16.16	32.16	0
1987-02-05	Dharwad	15.71	31.88	0
1987-02-06	Dharwad	16.29	32.02	0
1987-02-07	Dharwad	16.62	32.42	0
1987-02-08	Dharwad	15.9	31.62	0
1987-02-09	Dharwad	15.69	31.93	0
1987-02-10	Dharwad	16.11	32.29	0
1987-02-11	Dharwad	16.22	31.77	0
1987-02-12	Dharwad	16.77	32.03	0
1987-02-13	Dharwad	16.65	32.74	0
1987-02-14	Dharwad	16.92	32.26	0
1987-02-15	Dharwad	17.53	32	0
1987-02-16	Dharwad	16.99	32.24	0
1987-02-17	Dharwad	17.2	31.9	0
1987-02-18	Dharwad	17.78	31.77	0
1987-02-19	Dharwad	18.75	32.2	0
1987-02-20	Dharwad	19.56	32.68	0
1987-02-21	Dharwad	19.4	33.06	0
1987-02-22	Dharwad	19.27	33.9	0
1987-02-23	Dharwad	18.98	33.8	0
1987-02-24	Dharwad	18.66	33.74	0
1987-02-25	Dharwad	18.61	33.88	0
1987-02-26	Dharwad	18.52	33.64	0
1987-02-27	Dharwad	16.35	32.22	0
1987-02-28	Dharwad	17.11	32.09	0
1987-03-01	Dharwad	17	32.93	0
1987-03-02	Dharwad	17.79	33.88	0
1987-03-03	Dharwad	19.78	34.29	0
1987-03-04	Dharwad	19.14	33.6	0
1987-03-05	Dharwad	19.61	33.91	0
1987-03-06	Dharwad	20	34.14	0
1987-03-07	Dharwad	19.79	34.61	0
1987-03-08	Dharwad	19.42	33.97	0
1987-03-09	Dharwad	19.79	33.62	0
1987-03-10	Dharwad	19.7	33.95	0
1987-03-11	Dharwad	19.42	33.65	0
1987-03-12	Dharwad	17.69	32.48	0
1987-03-13	Dharwad	17.49	32.59	0
1987-03-14	Dharwad	17.26	33.07	0
1987-03-15	Dharwad	18.51	33.34	0
1987-03-16	Dharwad	19.17	34.24	0
1987-03-17	Dharwad	18.75	33.76	0
1987-03-18	Dharwad	19.08	34.09	0
1987-03-19	Dharwad	19.67	34.5	0
1987-03-20	Dharwad	19.47	34.79	0
1987-03-21	Dharwad	20.12	35.17	0
1987-03-22	Dharwad	20.58	35.45	0
1987-03-23	Dharwad	22.08	35.47	0
1987-03-24	Dharwad	22.22	36.33	0
1987-03-25	Dharwad	20.95	36.38	0
1987-03-26	Dharwad	20.35	35.71	0
1987-03-27	Dharwad	20.06	35.65	0
1987-03-28	Dharwad	21.09	35.91	0
1987-03-29	Dharwad	21.96	36.58	0
1987-03-30	Dharwad	21.41	35.79	0
1987-03-31	Dharwad	21.44	36.53	0
1987-04-01	Dharwad	21.81	36.59	0
1987-04-02	Dharwad	22.21	36.48	0
1987-04-03	Dharwad	22.03	36.66	0
1987-04-04	Dharwad	22.46	36.85	0
1987-04-05	Dharwad	23.2	37.1	0
1987-04-06	Dharwad	23.61	37.59	0
1987-04-07	Dharwad	24.27	37.45	0
1987-04-08	Dharwad	22.94	36.71	0
1987-04-09	Dharwad	22.53	37.33	0
1987-04-10	Dharwad	21.08	36.78	0
1987-04-11	Dharwad	20.23	35.9	0
1987-04-12	Dharwad	20.52	35.96	0
1987-04-13	Dharwad	20.3	36.26	0
1987-04-14	Dharwad	20.45	36.78	0
1987-04-15	Dharwad	22.2	37.22	0
1987-04-16	Dharwad	23.59	38.19	0
1987-04-17	Dharwad	23.74	37.53	0
1987-04-18	Dharwad	23.69	37.74	0
1987-04-19	Dharwad	23.23	37.22	0
1987-04-20	Dharwad	22.48	37.31	0
1987-04-21	Dharwad	24.15	37.99	0
1987-04-22	Dharwad	23.22	38.5	0
1987-04-23	Dharwad	24.31	37.99	0
1987-04-24	Dharwad	24.36	37.54	0
1987-04-25	Dharwad	23.31	36.3	0
1987-04-26	Dharwad	21.89	36.26	0
1987-04-27	Dharwad	22.31	36.01	0
1987-04-28	Dharwad	21.64	36.69	0
1987-04-29	Dharwad	23.21	37.62	0
1987-04-30	Dharwad	22.22	36.8	0
1987-05-01	Dharwad	21.88	37.07	0
1987-05-02	Dharwad	21.79	36.02	0
1987-05-03	Dharwad	21.81	35.65	0
1987-05-04	Dharwad	20.69	35.57	0
1987-05-05	Dharwad	20.45	35.61	0
1987-05-06	Dharwad	21.43	36.14	0
1987-05-07	Dharwad	21.83	36	0
1987-05-08	Dharwad	21.99	35.75	0
1987-05-09	Dharwad	22.89	36.37	0
1987-05-10	Dharwad	23.93	36.65	0.4
1987-05-11	Dharwad	24.34	36.92	0.9
1987-05-12	Dharwad	23.51	36.7	2.4
1987-05-13	Dharwad	22.31	34.41	0.3
1987-05-14	Dharwad	21.53	35.1	4.6
1987-05-15	Dharwad	21.91	34.92	1.7
1987-05-16	Dharwad	22.68	35.21	0
1987-05-17	Dharwad	23.1	36.17	3.5
1987-05-18	Dharwad	22.43	35.57	18.7
1987-05-19	Dharwad	23.28	34.88	0
1987-05-20	Dharwad	23.03	35.88	13.1
1987-05-21	Dharwad	24.17	35.28	0
1987-05-22	Dharwad	22.75	36.59	3.1
1987-05-23	Dharwad	23.88	36.91	0.3
1987-05-24	Dharwad	23.99	36.6	0
1987-05-25	Dharwad	24.26	36.81	0
1987-05-26	Dharwad	24.05	36.85	0
1987-05-27	Dharwad	22.63	36.44	8.8
1987-05-28	Dharwad	24	34.1	2.2
1987-05-29	Dharwad	23.18	36.35	0
1987-05-30	Dharwad	24	36.36	0
1987-05-31	Dharwad	24.95	36.28	0
1987-06-01	Dharwad	24.46	36.67	1
1987-06-02	Dharwad	23.77	35.12	9.3
1987-06-03	Dharwad	23.04	34.61	0
1987-06-04	Dharwad	22.08	32.1	0
1987-06-05	Dharwad	21.73	31.75	0.1
1987-06-06	Dharwad	21.46	29.5	0.6
1987-06-07	Dharwad	21.85	30.79	0.2
1987-06-08	Dharwad	20.91	32.79	1.1
1987-06-09	Dharwad	22.36	31.07	2.9
1987-06-10	Dharwad	22.69	31.3	0.2
1987-06-11	Dharwad	21.85	30.79	0.9
1987-06-12	Dharwad	22.02	30.48	2.9
1987-06-13	Dharwad	21.86	29.36	4.2
1987-06-14	Dharwad	21.91	27.97	2.1
1987-06-15	Dharwad	22.86	29.06	3.9
1987-06-16	Dharwad	22.91	30.94	0.2
1987-06-17	Dharwad	22.28	29.85	13.9
1987-06-18	Dharwad	22.7	30.58	1.6
1987-06-19	Dharwad	22.49	32	0
1987-06-20	Dharwad	22.9	30.4	2.9
1987-06-21	Dharwad	22.64	31.38	0
1987-06-22	Dharwad	23.65	32.04	1
1987-06-23	Dharwad	22.78	32.72	6.9
1987-06-24	Dharwad	22.79	32.73	6.2
1987-06-25	Dharwad	21.84	31.51	0.2
1987-06-26	Dharwad	22.5	31.45	13.8
1987-06-27	Dharwad	22.96	32.45	6.4
1987-06-28	Dharwad	22.46	32.08	0.6
1987-06-29	Dharwad	22.34	30.87	0
1987-06-30	Dharwad	22.08	29.71	2
1987-07-01	Dharwad	22.2	29.04	2.3
1987-07-02	Dharwad	21.9	28.89	3.9
1987-07-03	Dharwad	21.89	27.63	3.2
1987-07-04	Dharwad	22.29	27.81	6.6
1987-07-05	Dharwad	22.72	30.12	0
1987-07-06	Dharwad	22.33	28.6	0.5
1987-07-07	Dharwad	21.96	27.84	17.2
1987-07-08	Dharwad	22.21	26.78	6.4
1987-07-09	Dharwad	22.58	28.02	3.1
1987-07-10	Dharwad	22.78	28.58	2.1
1987-07-11	Dharwad	22.35	29.25	0.7
1987-07-12	Dharwad	22.53	29.85	0
1987-07-13	Dharwad	23.02	29.65	0
1987-07-14	Dharwad	23.2	29.76	0.4
1987-07-15	Dharwad	22.6	30.72	0.1
1987-07-16	Dharwad	22.4	30.42	5
1987-07-17	Dharwad	22.44	30.52	0.6
1987-07-18	Dharwad	22.8	30.36	0
1987-07-19	Dharwad	22.84	30.31	0
1987-07-20	Dharwad	22.9	29.7	0
1987-07-21	Dharwad	22.3	31.02	0
1987-07-22	Dharwad	22.47	31.38	0
1987-07-23	Dharwad	22.33	29.96	0
1987-07-24	Dharwad	22.21	30.35	0
1987-07-25	Dharwad	22.01	30.62	0
1987-07-26	Dharwad	22.06	28.93	6.5
1987-07-27	Dharwad	21.88	29.83	0
1987-07-28	Dharwad	22.44	30.64	0
1987-07-29	Dharwad	22.18	30.59	0
1987-07-30	Dharwad	22.49	31.5	0
1987-07-31	Dharwad	22.65	31.85	0
1987-08-01	Dharwad	22.11	31.49	0
1987-08-02	Dharwad	22.41	30.9	0
1987-08-03	Dharwad	22.68	30.77	0
1987-08-04	Dharwad	22.47	31.32	0
1987-08-05	Dharwad	21.66	31.17	18
1987-08-06	Dharwad	21.81	29.18	24.5
1987-08-07	Dharwad	21.49	29.11	6.9
1987-08-08	Dharwad	21.17	28.87	1
1987-08-09	Dharwad	21.5	29.35	0.3
1987-08-10	Dharwad	21.66	29.02	3.1
1987-08-11	Dharwad	21.69	29.75	0.4
1987-08-12	Dharwad	22.26	29.78	1.9
1987-08-13	Dharwad	22.23	30.47	2.3
1987-08-14	Dharwad	21.87	29.54	1.9
1987-08-15	Dharwad	21.56	27.59	29.3
1987-08-16	Dharwad	21.98	28.09	0.8
1987-08-17	Dharwad	22.38	28.53	7.3
1987-08-18	Dharwad	21.91	29.1	3.2
1987-08-19	Dharwad	21.07	29.09	8
1987-08-20	Dharwad	21.62	27.92	0.9
1987-08-21	Dharwad	21.82	27.07	2.1
1987-08-22	Dharwad	22.09	28.53	1
1987-08-23	Dharwad	22.2	29.14	1.9
1987-08-24	Dharwad	22	29.01	2.9
1987-08-25	Dharwad	22.08	28.29	4.5
1987-08-26	Dharwad	22.68	28.63	1.5
1987-08-27	Dharwad	22.74	28.63	0.5
1987-08-28	Dharwad	22.88	28.29	0
1987-08-29	Dharwad	22.3	28.82	1
1987-08-30	Dharwad	22.13	29.06	0
1987-08-31	Dharwad	21.66	30	0
1987-09-01	Dharwad	22.08	30.42	0
1987-09-02	Dharwad	22.15	30.22	0.2
1987-09-03	Dharwad	21.83	29.48	3.8
1987-09-04	Dharwad	21.55	28.7	1.4
1987-09-05	Dharwad	21.28	28.25	0.2
1987-09-06	Dharwad	21.6	30.03	0
1987-09-07	Dharwad	21.31	30.56	0
1987-09-08	Dharwad	21.57	30.91	0
1987-09-09	Dharwad	21.76	31.14	0
1987-09-10	Dharwad	21.67	30.53	0
1987-09-11	Dharwad	22.26	30.84	0
1987-09-12	Dharwad	22.23	30.68	0.7
1987-09-13	Dharwad	22.56	30.89	0
1987-09-14	Dharwad	22.71	31.31	25.1
1987-09-15	Dharwad	21.88	31.81	7.5
1987-09-16	Dharwad	22.26	32.6	0
1987-09-17	Dharwad	22.61	32.42	0
1987-09-18	Dharwad	23.06	32.21	2.3
1987-09-19	Dharwad	21.99	32.98	79.3
1987-09-20	Dharwad	22.18	32.93	5.5
1987-09-21	Dharwad	21.98	31.28	2.8
1987-09-22	Dharwad	22.14	30.91	0
1987-09-23	Dharwad	22.57	31.11	28.7
1987-09-24	Dharwad	21.74	31.29	23.4
1987-09-25	Dharwad	22.06	30.35	5.3
1987-09-26	Dharwad	21.82	29.84	0
1987-09-27	Dharwad	21.57	30.27	0
1987-09-28	Dharwad	22.31	31.13	0
1987-09-29	Dharwad	21.56	31.82	100.9
1987-09-30	Dharwad	22.42	31.9	0.3
1987-10-01	Dharwad	22.64	32.31	0
1987-10-02	Dharwad	21.31	30.79	79.3
1987-10-03	Dharwad	21.66	28.99	8.7
1987-10-04	Dharwad	21.8	28.87	0
1987-10-05	Dharwad	21.88	28.87	6.4
1987-10-06	Dharwad	21.77	28.54	6.5
1987-10-07	Dharwad	21.51	29.97	2.3
1987-10-08	Dharwad	21.89	30.97	0
1987-10-09	Dharwad	22.37	31.14	1.8
1987-10-10	Dharwad	21.38	30.44	3.6
1987-10-11	Dharwad	21.68	31.07	1.7
1987-10-12	Dharwad	21.56	31.56	0
1987-10-13	Dharwad	22.12	31.12	0
1987-10-14	Dharwad	21.04	30.93	35
1987-10-15	Dharwad	21.35	31.32	0
1987-10-16	Dharwad	20.95	31.42	0
1987-10-17	Dharwad	22.12	30.7	1.8
1987-10-18	Dharwad	22.18	29.38	0
1987-10-19	Dharwad	21.92	30.43	0
1987-10-20	Dharwad	22.51	31.5	0
1987-10-21	Dharwad	22.7	31.34	19.8
1987-10-22	Dharwad	22.06	31.67	9.1
1987-10-23	Dharwad	21.19	30.02	27
1987-10-24	Dharwad	21.58	30.65	4.6
1987-10-25	Dharwad	20.04	31.52	9.3
1987-10-26	Dharwad	20.35	31.54	0
1987-10-27	Dharwad	19.7	31.66	0
1987-10-28	Dharwad	18.21	31.63	0
1987-10-29	Dharwad	17.57	31.65	0
1987-10-30	Dharwad	19.29	31.72	0
1987-10-31	Dharwad	19.93	31.83	0
1987-11-01	Dharwad	19.28	31.91	0
1987-11-02	Dharwad	17.64	32.47	0
1987-11-03	Dharwad	18.69	31.24	0
1987-11-04	Dharwad	20.84	30.71	4.3
1987-11-05	Dharwad	21.73	28.56	21.7
1987-11-06	Dharwad	22.12	30.46	0
1987-11-07	Dharwad	21.62	30.74	0
1987-11-08	Dharwad	21.18	31.53	0.7
1987-11-09	Dharwad	17.85	30.74	0
1987-11-10	Dharwad	16.1	31.15	0
1987-11-11	Dharwad	17.04	30.96	0
1987-11-12	Dharwad	19.94	29.4	0.9
1987-11-13	Dharwad	19.24	28.53	0
1987-11-14	Dharwad	20.11	28.48	0
1987-11-15	Dharwad	20.49	26.3	0.2
1987-11-16	Dharwad	21.16	27.86	1.8
1987-11-17	Dharwad	21.03	29.38	0
1987-11-18	Dharwad	21.39	30.24	0
1987-11-19	Dharwad	20.69	30.7	0
1987-11-20	Dharwad	21.09	30.17	0.1
1987-11-21	Dharwad	20.47	30.03	3.8
1987-11-22	Dharwad	20.52	30.02	0
1987-11-23	Dharwad	19.01	30.95	0
1987-11-24	Dharwad	18.2	30.56	0
1987-11-25	Dharwad	18.6	31.05	0
1987-11-26	Dharwad	18.86	30.73	0
1987-11-27	Dharwad	17.2	31.45	0
1987-11-28	Dharwad	16.97	31.08	0
1987-11-29	Dharwad	15.48	30.47	0
1987-11-30	Dharwad	15.83	30.46	0
1987-12-01	Dharwad	15.23	30.52	0
1987-12-02	Dharwad	15.18	30.1	0
1987-12-03	Dharwad	16.61	30.41	0
1987-12-04	Dharwad	17.61	31.2	0
1987-12-05	Dharwad	19.7	30.61	0
1987-12-06	Dharwad	19.64	31.01	0
1987-12-07	Dharwad	19.12	30.94	0
1987-12-08	Dharwad	18.26	31.01	0
1987-12-09	Dharwad	20.47	30.87	0
1987-12-10	Dharwad	20.7	28.16	0
1987-12-11	Dharwad	21.52	28.72	0
1987-12-12	Dharwad	21.07	29.61	13.3
1987-12-13	Dharwad	20.78	29.16	0.8
1987-12-14	Dharwad	21.17	29.03	1.5
1987-12-15	Dharwad	19.64	27.13	0
1987-12-16	Dharwad	17.21	29.72	0
1987-12-17	Dharwad	15.59	29.21	0
1987-12-18	Dharwad	14.51	28.35	0
1987-12-19	Dharwad	13.65	28.51	0
1987-12-20	Dharwad	13.11	28.7	0
1987-12-21	Dharwad	13.1	28.08	0
1987-12-22	Dharwad	15.73	29.15	0
1987-12-23	Dharwad	18.07	29.08	0
1987-12-24	Dharwad	19.32	29.83	0
1987-12-25	Dharwad	19.71	30.75	0
1987-12-26	Dharwad	19.67	30.85	0
1987-12-27	Dharwad	17.28	30.36	0
1987-12-28	Dharwad	15.93	28.99	0
1987-12-29	Dharwad	15.9	28.4	0
1987-12-30	Dharwad	16.78	29.53	0
1987-12-31	Dharwad	16.28	30.06	0
1988-01-01	Dharwad	15.42	29.59	0
1988-01-02	Dharwad	15.6	28.77	0
1988-01-03	Dharwad	15.21	28.87	0
1988-01-04	Dharwad	15	29.36	0
1988-01-05	Dharwad	15.4	29.87	0
1988-01-06	Dharwad	15.06	30.29	0
1988-01-07	Dharwad	15.41	30.43	0
1988-01-08	Dharwad	15.54	30.47	0
1988-01-09	Dharwad	16.11	30.48	0
1988-01-10	Dharwad	15.54	30.13	0
1988-01-11	Dharwad	15.3	30.13	0
1988-01-12	Dharwad	15.32	30.54	0
1988-01-13	Dharwad	16	30.42	0
1988-01-14	Dharwad	15.71	30.76	0
1988-01-15	Dharwad	17.42	30.53	0
1988-01-16	Dharwad	16.91	31.01	0
1988-01-17	Dharwad	17.38	31.42	0
1988-01-18	Dharwad	17.19	31.75	0
1988-01-19	Dharwad	16.64	31.6	0
1988-01-20	Dharwad	16.78	31.39	0
1988-01-21	Dharwad	17.67	31.31	0
1988-01-22	Dharwad	16.71	30.69	0
1988-01-23	Dharwad	17.15	31.47	0
1988-01-24	Dharwad	16.02	31.11	0
1988-01-25	Dharwad	15.16	31.59	0
1988-01-26	Dharwad	15.95	31.81	0
1988-01-27	Dharwad	16.53	32.31	0
1988-01-28	Dharwad	17.8	33.03	0
1988-01-29	Dharwad	18.38	32.64	0
1988-01-30	Dharwad	18.55	33.25	0
1988-01-31	Dharwad	17.39	33.65	0
1988-02-01	Dharwad	17.49	33.59	0
1988-02-02	Dharwad	17.6	33.66	0
1988-02-03	Dharwad	18.21	33.85	0
1988-02-04	Dharwad	18.26	33.29	0
1988-02-05	Dharwad	17.34	32.84	0
1988-02-06	Dharwad	15.82	33.94	0
1988-02-07	Dharwad	16.59	32.91	0
1988-02-08	Dharwad	16.37	32.41	0
1988-02-09	Dharwad	16.61	32.5	0
1988-02-10	Dharwad	17.16	32.45	0
1988-02-11	Dharwad	18.1	32.42	0
1988-02-12	Dharwad	19.1	33.04	0
1988-02-13	Dharwad	18.49	33.51	0
1988-02-14	Dharwad	18.59	32.85	0
1988-02-15	Dharwad	19.12	32.78	0
1988-02-16	Dharwad	19.02	33	0
1988-02-17	Dharwad	18.5	33.15	0
1988-02-18	Dharwad	19.23	34.15	0
1988-02-19	Dharwad	19.66	35.22	0
1988-02-20	Dharwad	20.63	34.79	0
1988-02-21	Dharwad	21.54	34.99	0
1988-02-22	Dharwad	19.99	34.73	0
1988-02-23	Dharwad	18.35	33.88	0
1988-02-24	Dharwad	17.32	33.78	0
1988-02-25	Dharwad	17.71	33.87	0
1988-02-26	Dharwad	19.24	34.72	0
1988-02-27	Dharwad	19.04	34.3	0
1988-02-28	Dharwad	19.07	34.8	0
1988-02-29	Dharwad	19.1	33.87	0
1988-03-01	Dharwad	20.06	33.48	0
1988-03-02	Dharwad	18.33	33.06	0
1988-03-03	Dharwad	18.73	34.09	0
1988-03-04	Dharwad	19.95	34.66	0
1988-03-05	Dharwad	19.6	34.03	0
1988-03-06	Dharwad	19.41	34.25	0
1988-03-07	Dharwad	19.52	34.32	0
1988-03-08	Dharwad	20.49	33.88	0
1988-03-09	Dharwad	19.95	34.4	0
1988-03-10	Dharwad	20.46	34.35	0
1988-03-11	Dharwad	21.59	35.35	0
1988-03-12	Dharwad	20.96	35.47	0
1988-03-13	Dharwad	21.83	35.47	0
1988-03-14	Dharwad	20.67	35.83	0
1988-03-15	Dharwad	20.89	36.02	0
1988-03-16	Dharwad	22.03	36.31	0
1988-03-17	Dharwad	21.4	36.03	0
1988-03-18	Dharwad	21.86	36.03	0
1988-03-19	Dharwad	21.31	36.58	0
1988-03-20	Dharwad	21.7	35.8	0
1988-03-21	Dharwad	21.05	36.48	0
1988-03-22	Dharwad	20.59	36.4	0
1988-03-23	Dharwad	20.06	36.99	0
1988-03-24	Dharwad	19.55	36.35	0
1988-03-25	Dharwad	20	35.92	0
1988-03-26	Dharwad	20.1	35.64	0
1988-03-27	Dharwad	19.82	35.28	0
1988-03-28	Dharwad	18.76	34.28	0
1988-03-29	Dharwad	20.3	35.51	0
1988-03-30	Dharwad	20.82	36.13	0
1988-03-31	Dharwad	21.68	36.55	0
1988-04-01	Dharwad	21.86	36.11	0
1988-04-02	Dharwad	22.02	36.54	0
1988-04-03	Dharwad	23.21	36.63	0
1988-04-04	Dharwad	23.65	36.98	0
1988-04-05	Dharwad	23.5	37.05	0
1988-04-06	Dharwad	22.97	37.2	0
1988-04-07	Dharwad	23.06	37.36	0
1988-04-08	Dharwad	23.47	37.09	0
1988-04-09	Dharwad	23.99	37.22	0
1988-04-10	Dharwad	24.83	37.38	0
1988-04-11	Dharwad	23.64	37.02	0
1988-04-12	Dharwad	24.45	37.39	1.2
1988-04-13	Dharwad	22.32	37.23	5.7
1988-04-14	Dharwad	23.56	37.34	5.9
1988-04-15	Dharwad	22.87	36.64	5.8
1988-04-16	Dharwad	22.79	36.55	0.2
1988-04-17	Dharwad	22.83	36.94	3.2
1988-04-18	Dharwad	21.89	36.23	9.3
1988-04-19	Dharwad	22.16	35.64	2.5
1988-04-20	Dharwad	22.69	35.81	0
1988-04-21	Dharwad	22.61	36.47	0
1988-04-22	Dharwad	22.4	36.25	0
1988-04-23	Dharwad	22.34	35.59	0
1988-04-24	Dharwad	22.26	35.59	0
1988-04-25	Dharwad	20.85	35.07	17.3
1988-04-26	Dharwad	20.82	35.23	2.5
1988-04-27	Dharwad	22.33	35.71	0
1988-04-28	Dharwad	23.09	35.83	1.4
1988-04-29	Dharwad	23.57	35.98	0
1988-04-30	Dharwad	23.87	36.64	0
1988-05-01	Dharwad	23.37	36.14	5.7
1988-05-02	Dharwad	22.74	34.53	0
1988-05-03	Dharwad	23.56	36.3	0
1988-05-04	Dharwad	23.22	36.12	0.5
1988-05-05	Dharwad	23.62	36.24	14.5
1988-05-06	Dharwad	23.11	36.2	0
1988-05-07	Dharwad	23.93	37.33	0
1988-05-08	Dharwad	24.52	37.82	0
1988-05-09	Dharwad	25.53	38.73	0
1988-05-10	Dharwad	25.21	38.15	0
1988-05-11	Dharwad	24.19	36.66	0
1988-05-12	Dharwad	24.32	37.79	0
1988-05-13	Dharwad	24.68	37.69	0
1988-05-14	Dharwad	23.9	36.86	0
1988-05-15	Dharwad	24.43	38.13	0
1988-05-16	Dharwad	24.19	37.46	0
1988-05-17	Dharwad	24.33	36.65	0
1988-05-18	Dharwad	24.15	36.27	0
1988-05-19	Dharwad	24.15	35.79	0
1988-05-20	Dharwad	23.85	35.7	0
1988-05-21	Dharwad	23.98	35.63	0
1988-05-22	Dharwad	23.68	35.42	0
1988-05-23	Dharwad	24	35.19	3.5
1988-05-24	Dharwad	23.59	34.82	20.2
1988-05-25	Dharwad	23.78	34.98	19.1
1988-05-26	Dharwad	23.83	34.63	0
1988-05-27	Dharwad	24.56	36.4	0
1988-05-28	Dharwad	25.05	36.65	13.2
1988-05-29	Dharwad	25.01	35.65	0
1988-05-30	Dharwad	23.99	35.81	0
1988-05-31	Dharwad	24.04	35.38	0
1988-06-01	Dharwad	23.94	33.88	0
1988-06-02	Dharwad	24.41	35.55	0
1988-06-03	Dharwad	23.81	35.36	0
1988-06-04	Dharwad	23.76	34.89	0
1988-06-05	Dharwad	24.13	35.14	0
1988-06-06	Dharwad	22.17	33.78	0.9
1988-06-07	Dharwad	22.55	32.02	18.1
1988-06-08	Dharwad	23.26	33.4	31
1988-06-09	Dharwad	22.49	30.74	1.3
1988-06-10	Dharwad	22.7	29.32	1.3
1988-06-11	Dharwad	22.08	30.13	1.8
1988-06-12	Dharwad	22.58	30.52	0.4
1988-06-13	Dharwad	21.88	29.65	23.8
1988-06-14	Dharwad	21.83	27.97	2.3
1988-06-15	Dharwad	22.19	29.39	2.1
1988-06-16	Dharwad	22.44	30.92	2.2
1988-06-17	Dharwad	22.75	31.1	0
1988-06-18	Dharwad	22.65	31.62	0
1988-06-19	Dharwad	22.98	32.17	0.8
1988-06-20	Dharwad	22.2	32.19	0
1988-06-21	Dharwad	21.95	31.19	1
1988-06-22	Dharwad	22.02	28.78	0.3
1988-06-23	Dharwad	22.63	30.09	0
1988-06-24	Dharwad	22.25	29.69	2.6
1988-06-25	Dharwad	22.69	30.01	8
1988-06-26	Dharwad	22.32	29.64	0.9
1988-06-27	Dharwad	22.28	29.91	0.6
1988-06-28	Dharwad	21.39	28.97	1.4
1988-06-29	Dharwad	21.37	29.09	2.3
1988-06-30	Dharwad	21.56	29.84	0.8
1988-07-01	Dharwad	22.1	30.96	0
1988-07-02	Dharwad	22.06	29.85	1.8
1988-07-03	Dharwad	21.61	29	0.5
1988-07-04	Dharwad	22.33	28.82	0.5
1988-07-05	Dharwad	22.14	30.48	0
1988-07-06	Dharwad	22.14	29.02	0.3
1988-07-07	Dharwad	22.57	30.55	0
1988-07-08	Dharwad	22.88	30.88	0
1988-07-09	Dharwad	21.86	30.19	0
1988-07-10	Dharwad	21.69	28.76	0
1988-07-11	Dharwad	22.68	30.85	2.8
1988-07-12	Dharwad	22.61	30.35	4
1988-07-13	Dharwad	21.56	29.87	2.6
1988-07-14	Dharwad	21.09	27.73	5.1
1988-07-15	Dharwad	22.25	27.25	4.9
1988-07-16	Dharwad	21.99	27.52	7.7
1988-07-17	Dharwad	21.69	26.17	17.1
1988-07-18	Dharwad	21.76	26.14	16.5
1988-07-19	Dharwad	21.7	25.66	8.3
1988-07-20	Dharwad	22.18	27.81	2.8
1988-07-21	Dharwad	22.89	28.35	0.5
1988-07-22	Dharwad	22.39	27.88	2.1
1988-07-23	Dharwad	21.3	27.65	10.4
1988-07-24	Dharwad	21.13	28.75	6.2
1988-07-25	Dharwad	21.63	27.43	4.1
1988-07-26	Dharwad	22.05	27.2	3.2
1988-07-27	Dharwad	22.28	27.57	3.3
1988-07-28	Dharwad	22.29	28.62	4.9
1988-07-29	Dharwad	22.3	27.44	4.5
1988-07-30	Dharwad	21.72	27.1	1.1
1988-07-31	Dharwad	22.11	26.72	0.8
1988-08-01	Dharwad	22.36	28.55	0
1988-08-02	Dharwad	22.43	27.89	2.7
1988-08-03	Dharwad	22.52	27.8	22.9
1988-08-04	Dharwad	22.42	26.89	14.9
1988-08-05	Dharwad	22.27	27.74	6.8
1988-08-06	Dharwad	22.36	27.89	0.2
1988-08-07	Dharwad	22.25	28.26	3.8
1988-08-08	Dharwad	22.32	29.45	0
1988-08-09	Dharwad	21.84	29.88	1.1
1988-08-10	Dharwad	21.74	28.06	3.4
1988-08-11	Dharwad	22.7	28.52	4.9
1988-08-12	Dharwad	21.9	29.34	9.8
1988-08-13	Dharwad	22.02	29.64	0
1988-08-14	Dharwad	22.31	29.9	0
1988-08-15	Dharwad	22.01	29.85	0
1988-08-16	Dharwad	21.9	28.45	0
1988-08-17	Dharwad	21.39	27.88	14.3
1988-08-18	Dharwad	20.86	26.34	14.9
1988-08-19	Dharwad	21.2	26.26	4.8
1988-08-20	Dharwad	21.47	27.55	3.2
1988-08-21	Dharwad	22.28	28.49	0
1988-08-22	Dharwad	22.42	28.64	1.2
1988-08-23	Dharwad	22.07	29	1.2
1988-08-24	Dharwad	22.2	29.05	0.3
1988-08-25	Dharwad	22.05	29.4	0
1988-08-26	Dharwad	22.18	29.8	0
1988-08-27	Dharwad	21.9	29.91	0
1988-08-28	Dharwad	21.73	28.99	11.5
1988-08-29	Dharwad	21.31	28.35	13.2
1988-08-30	Dharwad	20.63	25.59	2.2
1988-08-31	Dharwad	20.28	25.64	5.3
1988-09-01	Dharwad	21.43	27.37	0.2
1988-09-02	Dharwad	21.9	27.72	0.3
1988-09-03	Dharwad	21.94	29.27	0.5
1988-09-04	Dharwad	21.89	27.95	0.2
1988-09-05	Dharwad	21.71	28.73	0.3
1988-09-06	Dharwad	21.59	29.35	1.8
1988-09-07	Dharwad	22.29	30.26	0
1988-09-08	Dharwad	22	29.37	0.2
1988-09-09	Dharwad	21.06	28.99	0
1988-09-10	Dharwad	21.44	29.03	0.3
1988-09-11	Dharwad	21.23	28.58	5.8
1988-09-12	Dharwad	21.57	28.72	0.3
1988-09-13	Dharwad	21.78	29.15	0
1988-09-14	Dharwad	22.01	30.75	6.9
1988-09-15	Dharwad	22.16	31.67	0.6
1988-09-16	Dharwad	21.8	30.04	16.8
1988-09-17	Dharwad	21.44	28.85	2.2
1988-09-18	Dharwad	21.61	29.04	0
1988-09-19	Dharwad	21.66	29.21	5.5
1988-09-20	Dharwad	21.48	27.27	0.7
1988-09-21	Dharwad	21.6	28.35	9.6
1988-09-22	Dharwad	22.12	28.32	5.7
1988-09-23	Dharwad	22.15	28.03	7.2
1988-09-24	Dharwad	21.84	28.42	4.4
1988-09-25	Dharwad	21.72	29.59	10.2
1988-09-26	Dharwad	21.56	29.8	12.7
1988-09-27	Dharwad	21.23	28.75	35.7
1988-09-28	Dharwad	21.06	29.1	0
1988-09-29	Dharwad	20.63	28.02	0
1988-09-30	Dharwad	20.69	28.87	5.5
1988-10-01	Dharwad	21.19	28.47	1.1
1988-10-02	Dharwad	21.92	28.92	2.1
1988-10-03	Dharwad	22.13	29.14	8.7
1988-10-04	Dharwad	21.51	30.1	0
1988-10-05	Dharwad	21.88	30.28	0
1988-10-06	Dharwad	21.81	30.12	3.1
1988-10-07	Dharwad	20.82	30.37	0
1988-10-08	Dharwad	21.18	30.48	0
1988-10-09	Dharwad	20.16	30.54	0
1988-10-10	Dharwad	19.27	30.76	0
1988-10-11	Dharwad	19.84	31.73	0
1988-10-12	Dharwad	21.62	31.28	0
1988-10-13	Dharwad	20.89	31.07	0
1988-10-14	Dharwad	20.06	31.74	0
1988-10-15	Dharwad	20.08	31.96	0
1988-10-16	Dharwad	20.11	32.14	0
1988-10-17	Dharwad	20.04	32.38	0
1988-10-18	Dharwad	19.95	32.24	0
1988-10-19	Dharwad	19.66	32.03	0
1988-10-20	Dharwad	19.71	31.98	0
1988-10-21	Dharwad	19.16	31.64	0
1988-10-22	Dharwad	19.07	31.63	0
1988-10-23	Dharwad	20.75	31.78	0
1988-10-24	Dharwad	21.24	31.74	0
1988-10-25	Dharwad	19.56	32.06	0
1988-10-26	Dharwad	18.71	33.14	0
1988-10-27	Dharwad	18.18	33.11	0
1988-10-28	Dharwad	17.73	32.59	0
1988-10-29	Dharwad	18.66	32.08	0
1988-10-30	Dharwad	18.21	31.86	0
1988-10-31	Dharwad	18.73	31.25	0
1988-11-01	Dharwad	19.57	31.19	0
1988-11-02	Dharwad	19.44	31.97	0
1988-11-03	Dharwad	20	32.04	0
1988-11-04	Dharwad	20.3	32.35	0
1988-11-05	Dharwad	20.2	33.16	0
1988-11-06	Dharwad	20.02	32.64	0
1988-11-07	Dharwad	20.83	32.47	0
1988-11-08	Dharwad	19.56	30.84	0
1988-11-09	Dharwad	17.51	31.85	0
1988-11-10	Dharwad	16.8	31.65	0
1988-11-11	Dharwad	17.05	32.11	0
1988-11-12	Dharwad	16.95	31.63	0
1988-11-13	Dharwad	16.85	31.04	0
1988-11-14	Dharwad	16.8	31.73	0
1988-11-15	Dharwad	16.42	31.24	0
1988-11-16	Dharwad	17.1	31.4	0
1988-11-17	Dharwad	16.13	31.31	0
1988-11-18	Dharwad	15.39	31.65	0
1988-11-19	Dharwad	15.52	31.25	0
1988-11-20	Dharwad	15.6	31.42	0
1988-11-21	Dharwad	16.16	31.83	0
1988-11-22	Dharwad	16.29	31.33	0
1988-11-23	Dharwad	16.4	30.44	0
1988-11-24	Dharwad	14.98	30.3	0
1988-11-25	Dharwad	15.08	30.23	0
1988-11-26	Dharwad	15.95	30.26	0
1988-11-27	Dharwad	15.85	29.94	0
1988-11-28	Dharwad	15.59	30.44	0
1988-11-29	Dharwad	16.31	30.39	0
1988-11-30	Dharwad	14.17	30.33	0
1988-12-01	Dharwad	12.87	29.81	0
1988-12-02	Dharwad	14.73	29.98	0
1988-12-03	Dharwad	16.57	30.45	0
1988-12-04	Dharwad	18.92	30.48	0
1988-12-05	Dharwad	17	31	0
1988-12-06	Dharwad	15.81	31.34	0
1988-12-07	Dharwad	15.73	30.5	0
1988-12-08	Dharwad	14.78	29.49	0
1988-12-09	Dharwad	15.77	30.27	0
1988-12-10	Dharwad	16.25	30.76	0
1988-12-11	Dharwad	16.44	30.89	0
1988-12-12	Dharwad	18.94	31.26	0
1988-12-13	Dharwad	19.87	28.41	10
1988-12-14	Dharwad	17.04	25.46	0
1988-12-15	Dharwad	17.72	27.74	0
1988-12-16	Dharwad	17.47	28.54	0
1988-12-17	Dharwad	16.15	30.04	0
1988-12-18	Dharwad	15.13	29.48	0
1988-12-19	Dharwad	16.15	28.81	0
1988-12-20	Dharwad	17.85	29.58	0
1988-12-21	Dharwad	17.38	29.09	0
1988-12-22	Dharwad	15.93	30.44	0
1988-12-23	Dharwad	16.22	30.57	0
1988-12-24	Dharwad	15.23	31.3	0
1988-12-25	Dharwad	15.39	30.94	0
1988-12-26	Dharwad	14.99	30.97	0
1988-12-27	Dharwad	15.34	29.93	0
1988-12-28	Dharwad	16	30.48	0
1988-12-29	Dharwad	15.75	29.78	0
1988-12-30	Dharwad	16.15	29.84	0
1988-12-31	Dharwad	15.41	30.47	0
1989-01-01	Dharwad	16.66	30.19	0
1989-01-02	Dharwad	16.19	29.39	0
1989-01-03	Dharwad	15.9	29.62	0
1989-01-04	Dharwad	16.21	30.5	0
1989-01-05	Dharwad	15.94	31.03	0
1989-01-06	Dharwad	16.19	31.18	0
1989-01-07	Dharwad	16.73	31.34	0
1989-01-08	Dharwad	15.94	30	0
1989-01-09	Dharwad	15.66	30.07	0
1989-01-10	Dharwad	15.01	30.42	0
1989-01-11	Dharwad	15.28	30.74	0
1989-01-12	Dharwad	15.24	31.63	0
1989-01-13	Dharwad	15.71	31.22	0
1989-01-14	Dharwad	16.82	30.7	0
1989-01-15	Dharwad	16.19	30.57	0
1989-01-16	Dharwad	15.59	30.8	0
1989-01-17	Dharwad	15.14	31.53	0
1989-01-18	Dharwad	14.71	31.15	0
1989-01-19	Dharwad	15.86	31.56	0
1989-01-20	Dharwad	15.77	31.2	0
1989-01-21	Dharwad	15.33	31.19	0
1989-01-22	Dharwad	15.59	31.34	0
1989-01-23	Dharwad	16.44	32.31	0
1989-01-24	Dharwad	17.24	31.62	0
1989-01-25	Dharwad	16.48	31.81	0
1989-01-26	Dharwad	16.52	31.95	0
1989-01-27	Dharwad	17.95	31.93	0
1989-01-28	Dharwad	17.89	31.75	0
1989-01-29	Dharwad	16.02	32.29	0
1989-01-30	Dharwad	16.6	31.89	0
1989-01-31	Dharwad	15.89	32.37	0
1989-02-01	Dharwad	14.95	33.09	0
1989-02-02	Dharwad	14.73	32.85	0
1989-02-03	Dharwad	15.61	33.43	0
1989-02-04	Dharwad	15.24	33.82	0
1989-02-05	Dharwad	14.76	33.17	0
1989-02-06	Dharwad	15.74	33.27	0
1989-02-07	Dharwad	16.18	33.2	0
1989-02-08	Dharwad	15.65	33.11	0
1989-02-09	Dharwad	15.51	33.2	0
1989-02-10	Dharwad	15.78	33.5	0
1989-02-11	Dharwad	16.4	33.59	0
1989-02-12	Dharwad	16.49	33.13	0
1989-02-13	Dharwad	16.02	33.37	0
1989-02-14	Dharwad	17.09	33.69	0
1989-02-15	Dharwad	16.99	33.72	0
1989-02-16	Dharwad	17.15	33.53	0
1989-02-17	Dharwad	16.74	34.24	0
1989-02-18	Dharwad	17.24	33.92	0
1989-02-19	Dharwad	16.81	34.32	0
1989-02-20	Dharwad	16.23	33.34	0
1989-02-21	Dharwad	15.06	33.76	0
1989-02-22	Dharwad	16.58	35.04	0
1989-02-23	Dharwad	17.41	33.89	0
1989-02-24	Dharwad	18.99	33.85	0
1989-02-25	Dharwad	19.2	33.44	0
1989-02-26	Dharwad	19.5	33.93	0
1989-02-27	Dharwad	17.99	33.83	0
1989-02-28	Dharwad	16.64	34.81	0
1989-03-01	Dharwad	17.91	34.43	0
1989-03-02	Dharwad	18.42	35.28	0
1989-03-03	Dharwad	18.92	35.15	0
1989-03-04	Dharwad	18.82	34.69	0
1989-03-05	Dharwad	19.05	34.8	0
1989-03-06	Dharwad	19.28	34.82	0
1989-03-07	Dharwad	18.82	34.73	0
1989-03-08	Dharwad	18.98	34.47	0
1989-03-09	Dharwad	20.55	34.11	0
1989-03-10	Dharwad	20.62	34.8	0
1989-03-11	Dharwad	19.39	34.28	0
1989-03-12	Dharwad	19.09	33.42	0
1989-03-13	Dharwad	19.7	34.14	0
1989-03-14	Dharwad	19.54	34.54	0.3
1989-03-15	Dharwad	19.68	33.86	0
1989-03-16	Dharwad	19.92	34	0
1989-03-17	Dharwad	19.21	33.86	0
1989-03-18	Dharwad	19.81	34.63	0
1989-03-19	Dharwad	21.3	35.01	0
1989-03-20	Dharwad	21.09	35.55	0
1989-03-21	Dharwad	22.19	35.9	0
1989-03-22	Dharwad	22.25	35.39	0.7
1989-03-23	Dharwad	22.79	35.23	0
1989-03-24	Dharwad	23.2	36.22	4.4
1989-03-25	Dharwad	21.18	34.56	0
1989-03-26	Dharwad	21.55	34.48	4.4
1989-03-27	Dharwad	20.78	33.49	0
1989-03-28	Dharwad	20.47	33.23	0.3
1989-03-29	Dharwad	19.31	33.08	9.9
1989-03-30	Dharwad	20.55	33.99	0
1989-03-31	Dharwad	21.95	34.81	0
1989-04-01	Dharwad	22.46	35.02	0
1989-04-02	Dharwad	22.38	36.17	2.4
1989-04-03	Dharwad	22.36	36.12	0
1989-04-04	Dharwad	21.42	36.11	0
1989-04-05	Dharwad	21.4	35.98	0
1989-04-06	Dharwad	22.42	36.46	0
1989-04-07	Dharwad	21.33	37.56	0
1989-04-08	Dharwad	21.67	37.48	0
1989-04-09	Dharwad	22.43	37.49	0
1989-04-10	Dharwad	22.41	37.62	0
1989-04-11	Dharwad	22.06	37.28	0
1989-04-12	Dharwad	21.18	36.84	0
1989-04-13	Dharwad	20.99	36.23	0
1989-04-14	Dharwad	21.89	37.1	0
1989-04-15	Dharwad	22.98	37.71	0
1989-04-16	Dharwad	23.39	38	2.6
1989-04-17	Dharwad	23.42	37.53	0
1989-04-18	Dharwad	23.78	38.04	0.4
1989-04-19	Dharwad	23.89	37.78	0
1989-04-20	Dharwad	24.02	36.79	0
1989-04-21	Dharwad	22.56	36.59	0.2
1989-04-22	Dharwad	23.84	36.71	0
1989-04-23	Dharwad	22.23	36.6	0
1989-04-24	Dharwad	23.22	34.29	0
1989-04-25	Dharwad	23.7	33.79	0
1989-04-26	Dharwad	23.74	36.86	0
1989-04-27	Dharwad	23.6	36.88	0
1989-04-28	Dharwad	23.58	35.84	0
1989-04-29	Dharwad	22.6	35.89	0
1989-04-30	Dharwad	21.78	36.96	0
1989-05-01	Dharwad	22.51	36.84	0
1989-05-02	Dharwad	23.81	37.78	0
1989-05-03	Dharwad	23.14	37.12	6
1989-05-04	Dharwad	22.44	36.8	0.2
1989-05-05	Dharwad	22.92	35.12	0
1989-05-06	Dharwad	23.12	36.16	0.2
1989-05-07	Dharwad	22.26	35.93	0.8
1989-05-08	Dharwad	24.27	36.01	0
1989-05-09	Dharwad	23.83	36.72	0.6
1989-05-10	Dharwad	23.87	37.49	0
1989-05-11	Dharwad	23.67	37.96	0
1989-05-12	Dharwad	23.52	37.7	0
1989-05-13	Dharwad	23.53	36.7	0
1989-05-14	Dharwad	24.02	36.52	0
1989-05-15	Dharwad	24.13	37.06	0
1989-05-16	Dharwad	23.84	36.47	0
1989-05-17	Dharwad	24.08	36.42	1.5
1989-05-18	Dharwad	21.03	36.12	14.1
1989-05-19	Dharwad	22.14	34.89	4.1
1989-05-20	Dharwad	23.62	35.55	0
1989-05-21	Dharwad	24.15	35.7	0
1989-05-22	Dharwad	24.41	35.18	0
1989-05-23	Dharwad	23.85	35.38	0
1989-05-24	Dharwad	23.32	34.85	0
1989-05-25	Dharwad	23.53	34.2	0
1989-05-26	Dharwad	22.6	34.4	0
1989-05-27	Dharwad	23.27	34.24	0
1989-05-28	Dharwad	23.48	34.58	0
1989-05-29	Dharwad	22.62	34.6	0
1989-05-30	Dharwad	22.78	34.64	0
1989-05-31	Dharwad	24.09	34.94	0
1989-06-01	Dharwad	22.91	35.23	1.4
1989-06-02	Dharwad	22.6	35.3	1.2
1989-06-03	Dharwad	22.53	31.99	0
1989-06-04	Dharwad	22.6	34.02	28.5
1989-06-05	Dharwad	22.73	32.42	0
1989-06-06	Dharwad	23.34	32.86	0
1989-06-07	Dharwad	21.77	31.62	4.3
1989-06-08	Dharwad	21.64	29.75	5.6
1989-06-09	Dharwad	21.81	28.66	3
1989-06-10	Dharwad	22.26	27.46	1.5
1989-06-11	Dharwad	22.32	28.07	3.5
1989-06-12	Dharwad	22.61	28.61	0.3
1989-06-13	Dharwad	22.62	29.31	0.2
1989-06-14	Dharwad	22.52	28.78	0.4
1989-06-15	Dharwad	21.75	29.41	0.9
1989-06-16	Dharwad	21.42	28.37	3.3
1989-06-17	Dharwad	21.82	29.13	0.3
1989-06-18	Dharwad	21.44	29.51	4.9
1989-06-19	Dharwad	21.63	28.06	0.7
1989-06-20	Dharwad	22.27	30.66	0
1989-06-21	Dharwad	22.21	31.13	0
[truncated: 8,959 more rows]

## Sheet: Durgapura
Day	Center	Min. Temperature	Max. Temperature	Rainfall
1984-01-01	Durgapura	6.87	22.62	0
1984-01-02	Durgapura	8.01	22.62	0
1984-01-03	Durgapura	4.93	20.64	0
1984-01-04	Durgapura	5.78	21.43	0
1984-01-05	Durgapura	5.48	21.93	0
1984-01-06	Durgapura	5.32	21.83	0
1984-01-07	Durgapura	4.52	20.12	0
1984-01-08	Durgapura	5.4	19.18	0
1984-01-09	Durgapura	6.54	19.86	0
1984-01-10	Durgapura	8.41	20.09	0
1984-01-11	Durgapura	8.42	21.02	0
1984-01-12	Durgapura	9.68	23.29	0
1984-01-13	Durgapura	10.67	25.27	0
1984-01-14	Durgapura	7.91	23.36	0
1984-01-15	Durgapura	8.13	22.01	0
1984-01-16	Durgapura	7.71	22.7	0
1984-01-17	Durgapura	4.65	20.88	0
1984-01-18	Durgapura	5.92	21.44	0
1984-01-19	Durgapura	7.46	24.16	0
1984-01-20	Durgapura	7.2	23.31	0
1984-01-21	Durgapura	5	21.63	0
1984-01-22	Durgapura	7.3	22.29	0
1984-01-23	Durgapura	7.1	22.18	0
1984-01-24	Durgapura	8	22.01	0
1984-01-25	Durgapura	7.51	21.55	0
1984-01-26	Durgapura	6.87	22.85	0
1984-01-27	Durgapura	5.99	21.98	0
1984-01-28	Durgapura	4.58	21.37	0
1984-01-29	Durgapura	4.76	21.61	0
1984-01-30	Durgapura	4.05	22.22	0
1984-01-31	Durgapura	6.48	23.4	0
1984-02-01	Durgapura	9.61	26.13	0
1984-02-02	Durgapura	10.03	27.1	0
1984-02-03	Durgapura	9.44	26.16	0
1984-02-04	Durgapura	7.46	24.12	0
1984-02-05	Durgapura	6.77	23.61	0
1984-02-06	Durgapura	4.93	22.22	0
1984-02-07	Durgapura	6.8	23.9	0
1984-02-08	Durgapura	7.04	24.93	0
1984-02-09	Durgapura	5.86	22.44	0
1984-02-10	Durgapura	7.44	24.15	0
1984-02-11	Durgapura	8.85	25.47	0
1984-02-12	Durgapura	9.49	25.37	0
1984-02-13	Durgapura	7.46	24.51	0
1984-02-14	Durgapura	6.14	23.53	0
1984-02-15	Durgapura	7.64	24.71	0
1984-02-16	Durgapura	8.78	25.14	0
1984-02-17	Durgapura	11.04	27.26	0
1984-02-18	Durgapura	12.22	28.82	0
1984-02-19	Durgapura	13.13	27.91	0
1984-02-20	Durgapura	8.46	24.59	0
1984-02-21	Durgapura	4.7	20.74	0
1984-02-22	Durgapura	3.52	17.86	0
1984-02-23	Durgapura	4.29	18.75	0
1984-02-24	Durgapura	3.57	20.35	0
1984-02-25	Durgapura	4.4	20.72	0
1984-02-26	Durgapura	5.26	21.88	0
1984-02-27	Durgapura	6.53	24.72	0
1984-02-28	Durgapura	8.42	26.78	0
1984-02-29	Durgapura	9.73	27.97	0
1984-03-01	Durgapura	10.73	28.43	0
1984-03-02	Durgapura	11.2	30.54	0
1984-03-03	Durgapura	11.06	29.84	0
1984-03-04	Durgapura	12.52	31.22	0
1984-03-05	Durgapura	11.45	30.9	0
1984-03-06	Durgapura	10.93	30.76	0
1984-03-07	Durgapura	12.05	32.36	0
1984-03-08	Durgapura	12.71	32.61	0
1984-03-09	Durgapura	12.58	33.18	0
1984-03-10	Durgapura	13.69	33.37	0
1984-03-11	Durgapura	16.52	34.75	0
1984-03-12	Durgapura	17.37	34.76	0
1984-03-13	Durgapura	17.73	34.42	0
1984-03-14	Durgapura	16.44	34.97	0
1984-03-15	Durgapura	17.34	34.93	0
1984-03-16	Durgapura	18.03	35.27	0
1984-03-17	Durgapura	17.65	33.89	0
1984-03-18	Durgapura	18.85	33.96	0
1984-03-19	Durgapura	13.92	33.61	0
1984-03-20	Durgapura	13	30.72	0
1984-03-21	Durgapura	14.54	32.27	0
1984-03-22	Durgapura	16.26	35.02	0
1984-03-23	Durgapura	18.62	36.65	0
1984-03-24	Durgapura	20.09	37.67	0
1984-03-25	Durgapura	20.88	37.86	0
1984-03-26	Durgapura	20.17	37.29	0
1984-03-27	Durgapura	18.06	35.13	0
1984-03-28	Durgapura	18.62	35.61	0
1984-03-29	Durgapura	20.11	37.32	0
1984-03-30	Durgapura	21.19	39.7	0
1984-03-31	Durgapura	22.07	40.98	0
1984-04-01	Durgapura	22.57	40.35	0
1984-04-02	Durgapura	23.01	39.57	0
1984-04-03	Durgapura	21.64	38.28	0
1984-04-04	Durgapura	20.17	37.45	0
1984-04-05	Durgapura	18.44	36.06	0
1984-04-06	Durgapura	18.99	36.65	0
1984-04-07	Durgapura	19.63	36.93	0
1984-04-08	Durgapura	19.03	36.6	0
1984-04-09	Durgapura	20.83	36.64	0
1984-04-10	Durgapura	16.37	32.52	0
1984-04-11	Durgapura	16.8	34.41	0
1984-04-12	Durgapura	18.21	35.74	0
1984-04-13	Durgapura	19.73	37.54	0
1984-04-14	Durgapura	21.63	39.29	0
1984-04-15	Durgapura	22.66	40.93	0
1984-04-16	Durgapura	23.79	41.85	0
1984-04-17	Durgapura	22.97	42.07	0
1984-04-18	Durgapura	24.16	40.55	0
1984-04-19	Durgapura	24.44	40.56	0
1984-04-20	Durgapura	25.06	40.03	0
1984-04-21	Durgapura	24.89	39.29	0
1984-04-22	Durgapura	20.68	36.89	0
1984-04-23	Durgapura	19.68	35.45	0
1984-04-24	Durgapura	20.98	34.47	0
1984-04-25	Durgapura	21.65	36.77	0
1984-04-26	Durgapura	23.16	39.01	0
1984-04-27	Durgapura	25.21	41.39	0
1984-04-28	Durgapura	25.99	41.98	0
1984-04-29	Durgapura	24.74	40.15	0
1984-04-30	Durgapura	21.82	39.97	0
1984-05-01	Durgapura	21.51	39.84	0
1984-05-02	Durgapura	21.91	40.95	0
1984-05-03	Durgapura	24.3	40.6	0
1984-05-04	Durgapura	22.85	41.07	0
1984-05-05	Durgapura	23.57	40.88	0
1984-05-06	Durgapura	24.77	42.05	0
1984-05-07	Durgapura	25.3	42.44	0
1984-05-08	Durgapura	25.44	42.43	0
1984-05-09	Durgapura	26.82	42.88	0
1984-05-10	Durgapura	27.11	43.15	0
1984-05-11	Durgapura	27.44	43.37	0
1984-05-12	Durgapura	26.79	42.62	0
1984-05-13	Durgapura	27.29	43.06	0
1984-05-14	Durgapura	27.77	43.17	0
1984-05-15	Durgapura	27.85	42.33	0
1984-05-16	Durgapura	27.11	41.91	0
1984-05-17	Durgapura	26.5	42.19	0
1984-05-18	Durgapura	24.8	42.93	0
1984-05-19	Durgapura	24.37	43.55	0
1984-05-20	Durgapura	25.95	43.61	0
1984-05-21	Durgapura	27.09	42.63	0
1984-05-22	Durgapura	26.61	43.87	0
1984-05-23	Durgapura	27.47	44.11	0
1984-05-24	Durgapura	27.64	44.1	0
1984-05-25	Durgapura	28.35	44.56	0
1984-05-26	Durgapura	29.78	44.8	0
1984-05-27	Durgapura	30.37	44.9	0
1984-05-28	Durgapura	29.88	45.16	0
1984-05-29	Durgapura	28.57	45.27	0
1984-05-30	Durgapura	29.71	45.21	0
1984-05-31	Durgapura	29.43	44.66	0
1984-06-01	Durgapura	28.84	43.91	0
1984-06-02	Durgapura	27.11	41.9	0
1984-06-03	Durgapura	28.8	41.98	0
1984-06-04	Durgapura	28.09	42.65	0
1984-06-05	Durgapura	28.4	43.92	0
1984-06-06	Durgapura	29.68	43.07	0
1984-06-07	Durgapura	30.5	42.73	0
1984-06-08	Durgapura	28.84	42.85	0
1984-06-09	Durgapura	29.28	42.57	0
1984-06-10	Durgapura	27.44	41.49	2.1
1984-06-11	Durgapura	27.87	40.65	0.1
1984-06-12	Durgapura	25.98	38.18	6.4
1984-06-13	Durgapura	25.98	38.78	25.5
1984-06-14	Durgapura	24.85	37.58	0
1984-06-15	Durgapura	26.36	37.71	0
1984-06-16	Durgapura	27.28	39.46	0
1984-06-17	Durgapura	27.41	39.79	0
1984-06-18	Durgapura	27.7	40.32	0
1984-06-19	Durgapura	26.74	38.43	0
1984-06-20	Durgapura	26.59	38.32	0
1984-06-21	Durgapura	26.71	38.22	0
1984-06-22	Durgapura	27.58	38.92	0
1984-06-23	Durgapura	27.38	39.45	0
1984-06-24	Durgapura	27.53	39.17	0
1984-06-25	Durgapura	26.97	38.97	0
1984-06-26	Durgapura	27.3	37.78	0
1984-06-27	Durgapura	27.56	37.88	0
1984-06-28	Durgapura	27.62	37.38	0
1984-06-29	Durgapura	27.69	37.57	0
1984-06-30	Durgapura	28.57	38.23	0
1984-07-01	Durgapura	25.36	38.01	11.8
1984-07-02	Durgapura	24.98	35.1	3.7
1984-07-03	Durgapura	25.17	35.54	0.9
1984-07-04	Durgapura	25.82	35.96	0.2
1984-07-05	Durgapura	25.59	37.52	0
1984-07-06	Durgapura	25.47	35.28	4.8
1984-07-07	Durgapura	25.26	34.19	0
1984-07-08	Durgapura	25.18	33.81	13.5
1984-07-09	Durgapura	23.79	34.34	2
1984-07-10	Durgapura	24.41	32.57	0
1984-07-11	Durgapura	24.81	35.18	0
1984-07-12	Durgapura	24.76	35.24	0
1984-07-13	Durgapura	25.39	36.09	0
1984-07-14	Durgapura	25.1	36.27	0
1984-07-15	Durgapura	25.79	35.76	0
1984-07-16	Durgapura	25.29	35.96	0.7
1984-07-17	Durgapura	24.83	35.86	2.4
1984-07-18	Durgapura	24.84	34.16	0.1
1984-07-19	Durgapura	24.63	33.59	0.9
1984-07-20	Durgapura	24.55	32.65	2.4
1984-07-21	Durgapura	24.75	31.92	0.5
1984-07-22	Durgapura	24.64	33.29	0
1984-07-23	Durgapura	24.9	33.5	0
1984-07-24	Durgapura	25.36	33.23	0
1984-07-25	Durgapura	25.81	33.26	0
1984-07-26	Durgapura	26.19	34.39	0
1984-07-27	Durgapura	26.14	34.91	0
1984-07-28	Durgapura	25.32	34.41	0
1984-07-29	Durgapura	25.61	33.17	0
1984-07-30	Durgapura	25.33	33.62	0
1984-07-31	Durgapura	25.69	35.53	0
1984-08-01	Durgapura	25	35.92	2
1984-08-02	Durgapura	24.52	33.17	36.4
1984-08-03	Durgapura	24.74	33.02	8.3
1984-08-04	Durgapura	24.59	32.94	0.6
1984-08-05	Durgapura	24.02	30.27	0
1984-08-06	Durgapura	23.76	31.15	0
1984-08-07	Durgapura	24.75	32.49	0
1984-08-08	Durgapura	25.01	34.31	0
1984-08-09	Durgapura	23.63	31.27	0.4
1984-08-10	Durgapura	24.93	34.44	5.9
1984-08-11	Durgapura	25.59	34.19	0.6
1984-08-12	Durgapura	24.03	32.76	1
1984-08-13	Durgapura	24.14	30.94	0
1984-08-14	Durgapura	25.41	32.71	2.3
1984-08-15	Durgapura	24.96	34.73	2.6
1984-08-16	Durgapura	23.93	32.66	2.2
1984-08-17	Durgapura	24.76	32.85	3.7
1984-08-18	Durgapura	25.14	32.16	1.9
1984-08-19	Durgapura	24.29	31.72	1.1
1984-08-20	Durgapura	24.56	31.18	0.5
1984-08-21	Durgapura	24.57	30.86	3.8
1984-08-22	Durgapura	24.62	32.39	33.3
1984-08-23	Durgapura	23.32	32.37	6.2
1984-08-24	Durgapura	24.09	30.74	5.3
1984-08-25	Durgapura	24.3	31.52	2
1984-08-26	Durgapura	23.89	30.13	1.7
1984-08-27	Durgapura	23.87	30.56	0.1
1984-08-28	Durgapura	23.88	30.81	0.4
1984-08-29	Durgapura	24.07	31.38	0
1984-08-30	Durgapura	24.06	32.68	0
1984-08-31	Durgapura	23.79	31.48	0
1984-09-01	Durgapura	24.3	31.84	0
1984-09-02	Durgapura	23.64	30.83	19.5
1984-09-03	Durgapura	23.42	29.3	9.5
1984-09-04	Durgapura	23.33	28.21	29
1984-09-05	Durgapura	23.96	28.29	10.6
1984-09-06	Durgapura	23.92	29.81	0.5
1984-09-07	Durgapura	22.76	29.84	0
1984-09-08	Durgapura	22.42	30.26	0
1984-09-09	Durgapura	22.01	31.22	0
1984-09-10	Durgapura	23.08	32.85	0
1984-09-11	Durgapura	23.34	34.11	0
1984-09-12	Durgapura	24.37	32.82	0
1984-09-13	Durgapura	24.24	32.96	0
1984-09-14	Durgapura	23.91	32.96	0.2
1984-09-15	Durgapura	23.31	32.47	0
1984-09-16	Durgapura	23.65	31.68	0
1984-09-17	Durgapura	23.68	31.45	0.2
1984-09-18	Durgapura	22.31	30.05	0
1984-09-19	Durgapura	21.77	30.52	0
1984-09-20	Durgapura	22.06	32.13	0
1984-09-21	Durgapura	23.03	33.1	0
1984-09-22	Durgapura	22.11	33.51	0.7
1984-09-23	Durgapura	21.99	33.37	0
1984-09-24	Durgapura	21.83	34.14	0
1984-09-25	Durgapura	21.53	34.51	0
1984-09-26	Durgapura	21.1	34.91	0
1984-09-27	Durgapura	21.03	34.95	0
1984-09-28	Durgapura	20.8	34.81	0
1984-09-29	Durgapura	20.18	35.67	0
1984-09-30	Durgapura	19.92	35.65	0
1984-10-01	Durgapura	19.99	35.65	0
1984-10-02	Durgapura	20.2	36.31	0
1984-10-03	Durgapura	20.99	36.56	0
1984-10-04	Durgapura	20.7	35.49	0
1984-10-05	Durgapura	18.14	35.38	0
1984-10-06	Durgapura	17.52	35.45	0
1984-10-07	Durgapura	17.38	34.93	0
1984-10-08	Durgapura	17.41	35.9	0
1984-10-09	Durgapura	18.26	35.26	0
1984-10-10	Durgapura	19.09	35.91	0
1984-10-11	Durgapura	18.43	35.48	0
1984-10-12	Durgapura	16.8	34.53	0
1984-10-13	Durgapura	15.72	33.76	0
1984-10-14	Durgapura	16.21	34.01	0
1984-10-15	Durgapura	16.28	33.86	0
1984-10-16	Durgapura	16.24	33.45	0
1984-10-17	Durgapura	16.62	33.34	0
1984-10-18	Durgapura	15.74	32.87	0
1984-10-19	Durgapura	15.29	33.17	0
1984-10-20	Durgapura	15.16	33.95	0
1984-10-21	Durgapura	15.53	34.64	0
1984-10-22	Durgapura	16.26	34.19	0
1984-10-23	Durgapura	17.03	34.69	0
1984-10-24	Durgapura	19.07	34.67	0
1984-10-25	Durgapura	18.41	34.27	0
1984-10-26	Durgapura	18.04	33.77	0
1984-10-27	Durgapura	18.29	33.64	0
1984-10-28	Durgapura	15.56	32.72	0
1984-10-29	Durgapura	15.42	32.05	0
1984-10-30	Durgapura	14.92	32	0
1984-10-31	Durgapura	15.06	32.05	0
1984-11-01	Durgapura	12.86	30.64	0
1984-11-02	Durgapura	12.3	30.27	0
1984-11-03	Durgapura	12.09	30.46	0
1984-11-04	Durgapura	11.89	30.19	0
1984-11-05	Durgapura	12.14	29.95	0
1984-11-06	Durgapura	11.72	30.08	0
1984-11-07	Durgapura	12.14	30.36	0
1984-11-08	Durgapura	13.19	31.06	0
1984-11-09	Durgapura	13.52	31.28	0
1984-11-10	Durgapura	13.48	31.91	0
1984-11-11	Durgapura	11.71	30.08	0
1984-11-12	Durgapura	11.55	29.88	0
1984-11-13	Durgapura	12.23	30.69	0
1984-11-14	Durgapura	12.22	31.99	0
1984-11-15	Durgapura	12.66	32.09	0
1984-11-16	Durgapura	12.72	31.84	0
1984-11-17	Durgapura	12.66	31.46	0
1984-11-18	Durgapura	12.43	31.78	0
1984-11-19	Durgapura	11.96	31.25	0
1984-11-20	Durgapura	12.03	30.37	0
1984-11-21	Durgapura	12.41	30.46	0
1984-11-22	Durgapura	13.51	30.63	0
1984-11-23	Durgapura	13.43	29.94	0
1984-11-24	Durgapura	13.18	29.77	0
1984-11-25	Durgapura	11.45	27.79	0
1984-11-26	Durgapura	9.2	26.96	0
1984-11-27	Durgapura	7.69	26.23	0
1984-11-28	Durgapura	8.01	27.1	0
1984-11-29	Durgapura	8.37	28.27	0
1984-11-30	Durgapura	8.61	27.84	0
1984-12-01	Durgapura	9.57	27.05	0
1984-12-02	Durgapura	10.09	26.42	0
1984-12-03	Durgapura	9.68	26.32	0
1984-12-04	Durgapura	8.81	26.76	0
1984-12-05	Durgapura	8.41	27.54	0
1984-12-06	Durgapura	9.74	28.12	0
1984-12-07	Durgapura	9.03	27.33	0
1984-12-08	Durgapura	8.37	26.62	0
1984-12-09	Durgapura	9.34	27.54	0
1984-12-10	Durgapura	11.7	29.53	0
1984-12-11	Durgapura	12.03	29.21	0
1984-12-12	Durgapura	11.77	29.22	0
1984-12-13	Durgapura	12.76	30.12	0
1984-12-14	Durgapura	7.51	24.9	0
1984-12-15	Durgapura	6.71	24.93	0
1984-12-16	Durgapura	7.32	27.1	0
1984-12-17	Durgapura	7.66	26.72	0
1984-12-18	Durgapura	6.13	26.62	0
1984-12-19	Durgapura	4.83	25.14	0
1984-12-20	Durgapura	4.51	25.19	0
1984-12-21	Durgapura	7.58	24.66	0
1984-12-22	Durgapura	4.81	24.04	0
1984-12-23	Durgapura	6.12	25.27	0
1984-12-24	Durgapura	7.34	24.49	0
1984-12-25	Durgapura	7	24.85	0
1984-12-26	Durgapura	6.61	22.74	0
1984-12-27	Durgapura	6.98	22.57	0
1984-12-28	Durgapura	7.8	22.59	0
1984-12-29	Durgapura	7.57	23.06	0
1984-12-30	Durgapura	9.56	22.8	0
1984-12-31	Durgapura	8.92	23.67	0
1985-01-01	Durgapura	6.92	22.37	0
1985-01-02	Durgapura	5.52	19.79	0
1985-01-03	Durgapura	5.03	20.49	0
1985-01-04	Durgapura	7.46	21.05	0
1985-01-05	Durgapura	9.11	20.86	0
1985-01-06	Durgapura	6.93	21.27	0
1985-01-07	Durgapura	8.17	20.4	0
1985-01-08	Durgapura	7.8	20.77	0
1985-01-09	Durgapura	8.29	21.72	0
1985-01-10	Durgapura	8.71	22.28	0
1985-01-11	Durgapura	8.83	23.12	0
1985-01-12	Durgapura	8.27	22.71	0
1985-01-13	Durgapura	7.18	22.64	0
1985-01-14	Durgapura	5.24	22.43	0
1985-01-15	Durgapura	6.97	23.42	0
1985-01-16	Durgapura	5.77	24.21	0
1985-01-17	Durgapura	6.49	24.36	0
1985-01-18	Durgapura	8.17	23.39	0
1985-01-19	Durgapura	11.13	25.19	0
1985-01-20	Durgapura	8.71	22.66	0
1985-01-21	Durgapura	10.33	22.44	0
1985-01-22	Durgapura	7.56	22.06	0
1985-01-23	Durgapura	7.41	22.81	0
1985-01-24	Durgapura	6.46	23.55	0
1985-01-25	Durgapura	6.52	23.81	0
1985-01-26	Durgapura	8.41	25.54	0
1985-01-27	Durgapura	8.6	26.68	0
1985-01-28	Durgapura	8.75	24.49	0
1985-01-29	Durgapura	7.73	23.69	0
1985-01-30	Durgapura	7.78	24.94	0
1985-01-31	Durgapura	8.46	25.82	0
1985-02-01	Durgapura	7.63	25.56	0
1985-02-02	Durgapura	7	25.49	0
1985-02-03	Durgapura	7.85	26.13	0
1985-02-04	Durgapura	10.03	27.08	0
1985-02-05	Durgapura	10.5	27.9	0
1985-02-06	Durgapura	7.94	26.15	0
1985-02-07	Durgapura	6.22	25.43	0
1985-02-08	Durgapura	8.09	27.75	0
1985-02-09	Durgapura	9.72	28.57	0
1985-02-10	Durgapura	8.12	27.17	0
1985-02-11	Durgapura	6.63	26.01	0
1985-02-12	Durgapura	5.91	25.13	0
1985-02-13	Durgapura	6.12	26.05	0
1985-02-14	Durgapura	7.02	26.36	0
1985-02-15	Durgapura	6.69	26.04	0
1985-02-16	Durgapura	7.03	27.18	0
1985-02-17	Durgapura	7.35	28.48	0
1985-02-18	Durgapura	10.02	29.88	0
1985-02-19	Durgapura	10.68	31.47	0
1985-02-20	Durgapura	11.71	29.76	0
1985-02-21	Durgapura	9.19	27.53	0
1985-02-22	Durgapura	8.23	26.92	0
1985-02-23	Durgapura	8.07	28.57	0
1985-02-24	Durgapura	9.57	30.73	0
1985-02-25	Durgapura	10.81	31.47	0
1985-02-26	Durgapura	10.87	30.76	0
1985-02-27	Durgapura	11.3	32.39	0
1985-02-28	Durgapura	13.38	34.89	0
1985-03-01	Durgapura	13.37	33.57	0
1985-03-02	Durgapura	14.43	34.42	0
1985-03-03	Durgapura	15.49	35.32	0
1985-03-04	Durgapura	14.32	35.26	0
1985-03-05	Durgapura	15.93	36.07	0
1985-03-06	Durgapura	16.95	36.65	0
1985-03-07	Durgapura	16.93	36.74	0
1985-03-08	Durgapura	15.64	35.05	0
1985-03-09	Durgapura	15	35.7	0
1985-03-10	Durgapura	15.71	35.86	0
1985-03-11	Durgapura	15.44	34.49	0
1985-03-12	Durgapura	17.14	35.74	0
1985-03-13	Durgapura	17.06	36.65	0
1985-03-14	Durgapura	15.24	35.24	0
1985-03-15	Durgapura	13.06	33.98	0
1985-03-16	Durgapura	14.97	35.45	0
1985-03-17	Durgapura	16.41	35.94	0
1985-03-18	Durgapura	18.3	35.33	0
1985-03-19	Durgapura	14.72	33.01	0
1985-03-20	Durgapura	14.91	32.64	0
1985-03-21	Durgapura	15.19	34.37	0
1985-03-22	Durgapura	17.31	36.47	0
1985-03-23	Durgapura	20.27	37.67	0
1985-03-24	Durgapura	21.31	37.04	0
1985-03-25	Durgapura	19.71	36.04	0
1985-03-26	Durgapura	20.75	37.18	0
1985-03-27	Durgapura	22.64	38.34	0
1985-03-28	Durgapura	22.88	38.41	0
1985-03-29	Durgapura	21.36	37.71	0
1985-03-30	Durgapura	20.58	36.75	0
1985-03-31	Durgapura	20.64	35.05	0
1985-04-01	Durgapura	21.5	35.63	0
1985-04-02	Durgapura	22.43	36.4	0
1985-04-03	Durgapura	18.45	35.02	4.3
1985-04-04	Durgapura	19.41	32.16	0
1985-04-05	Durgapura	19.69	34.38	0
1985-04-06	Durgapura	20.99	35.39	0
1985-04-07	Durgapura	20.67	35.29	0
1985-04-08	Durgapura	22.23	36.1	0
1985-04-09	Durgapura	23.45	36.21	0
1985-04-10	Durgapura	20.78	36.17	0
1985-04-11	Durgapura	18.79	34.54	0
1985-04-12	Durgapura	20.18	35.49	0
1985-04-13	Durgapura	23.23	38.1	0
1985-04-14	Durgapura	20.19	36.3	0
1985-04-15	Durgapura	19.6	35.36	0
1985-04-16	Durgapura	19.68	36.73	0
1985-04-17	Durgapura	21.47	38.53	0
1985-04-18	Durgapura	21.81	39.55	0
1985-04-19	Durgapura	23.01	39.76	0
1985-04-20	Durgapura	23.56	39.86	0
1985-04-21	Durgapura	25.18	40.11	0
1985-04-22	Durgapura	23.57	40.06	0
1985-04-23	Durgapura	22.71	39.63	0
1985-04-24	Durgapura	24.26	39.89	0
1985-04-25	Durgapura	24.75	39.99	0
1985-04-26	Durgapura	23.78	40.16	0
1985-04-27	Durgapura	23.91	41.43	0
1985-04-28	Durgapura	25.31	41.31	0
1985-04-29	Durgapura	25.22	41.8	0
1985-04-30	Durgapura	25.63	42.36	0
1985-05-01	Durgapura	25.56	41.81	0
1985-05-02	Durgapura	25.88	39.83	0
1985-05-03	Durgapura	24.31	39.21	0
1985-05-04	Durgapura	25.18	38.8	0
1985-05-05	Durgapura	25.03	39.91	0
1985-05-06	Durgapura	25.34	41.16	0
1985-05-07	Durgapura	25.53	42.14	0
1985-05-08	Durgapura	27.59	43.21	0
1985-05-09	Durgapura	26.8	42.47	0
1985-05-10	Durgapura	25.81	42.05	0
1985-05-11	Durgapura	24.83	40.4	0
1985-05-12	Durgapura	24.65	39.78	0
1985-05-13	Durgapura	24.89	41.58	0
1985-05-14	Durgapura	25.22	42.85	0
1985-05-15	Durgapura	24.94	41.63	0
1985-05-16	Durgapura	24.81	42.58	0
1985-05-17	Durgapura	24.86	42.44	0
1985-05-18	Durgapura	25.35	43.28	0
1985-05-19	Durgapura	25.62	44.09	0
1985-05-20	Durgapura	26.73	44.23	0
1985-05-21	Durgapura	28.16	44.29	0
1985-05-22	Durgapura	28.79	43.85	0
1985-05-23	Durgapura	28.04	42.65	0
1985-05-24	Durgapura	29.35	43.97	0
1985-05-25	Durgapura	27.83	44.34	0
1985-05-26	Durgapura	28.99	41.9	0
1985-05-27	Durgapura	28.56	42.79	0
1985-05-28	Durgapura	27.13	43.02	0
1985-05-29	Durgapura	28.34	43.05	0
1985-05-30	Durgapura	28.82	42.66	0
1985-05-31	Durgapura	27.41	40.93	0.5
1985-06-01	Durgapura	27.69	38	0
1985-06-02	Durgapura	26.6	38.26	2.5
1985-06-03	Durgapura	25.97	37.91	0
1985-06-04	Durgapura	27.08	37.8	0
1985-06-05	Durgapura	28.13	39.69	0
1985-06-06	Durgapura	28.7	41.42	0
1985-06-07	Durgapura	27.76	41.22	0
1985-06-08	Durgapura	26.52	39.78	0.4
1985-06-09	Durgapura	25.78	38.9	0.9
1985-06-10	Durgapura	25.1	37.57	0
1985-06-11	Durgapura	26.67	38.12	0
1985-06-12	Durgapura	27.35	37.58	0.6
1985-06-13	Durgapura	27.16	40.34	0
1985-06-14	Durgapura	28.33	41.06	0
1985-06-15	Durgapura	29.29	42.49	0
1985-06-16	Durgapura	28.63	42.13	0
1985-06-17	Durgapura	28.46	41.65	0
1985-06-18	Durgapura	28.83	41.75	0
1985-06-19	Durgapura	28.37	41.9	0
1985-06-20	Durgapura	28.05	40.53	0
1985-06-21	Durgapura	28.43	40.65	0
1985-06-22	Durgapura	28.57	40.67	0
1985-06-23	Durgapura	29.05	41.31	0
1985-06-24	Durgapura	29.15	41.58	0.4
1985-06-25	Durgapura	29.35	42.66	0
1985-06-26	Durgapura	27.92	42.58	0
1985-06-27	Durgapura	27.61	41.76	0
1985-06-28	Durgapura	26.74	41.01	0
1985-06-29	Durgapura	26.97	39.04	0
1985-06-30	Durgapura	26.53	37.94	0
1985-07-01	Durgapura	27.45	38.71	0
1985-07-02	Durgapura	27.13	38.36	0
1985-07-03	Durgapura	26.95	38	0.1
1985-07-04	Durgapura	27.47	39.35	0
1985-07-05	Durgapura	28.59	40.23	1.7
1985-07-06	Durgapura	27.07	39.58	0.3
1985-07-07	Durgapura	26.84	38.33	0.4
1985-07-08	Durgapura	26.93	38.72	0
1985-07-09	Durgapura	26.3	37.75	0
1985-07-10	Durgapura	26.5	37.72	0
1985-07-11	Durgapura	26.96	36.91	0
1985-07-12	Durgapura	26.69	35.09	8.3
1985-07-13	Durgapura	24.57	33.44	1.7
1985-07-14	Durgapura	24.82	31.84	0
1985-07-15	Durgapura	24.46	32.35	8.2
1985-07-16	Durgapura	23.4	30.54	63.6
1985-07-17	Durgapura	24.96	30.39	1
1985-07-18	Durgapura	24.31	31.09	7.7
1985-07-19	Durgapura	24.34	31.76	0.2
1985-07-20	Durgapura	24.46	32.62	0.1
1985-07-21	Durgapura	24.8	32.42	0
1985-07-22	Durgapura	24.72	33.54	0.9
1985-07-23	Durgapura	24.79	32.61	0
1985-07-24	Durgapura	25.18	34.19	13
1985-07-25	Durgapura	24.85	31.05	0
1985-07-26	Durgapura	24.72	32.07	1
1985-07-27	Durgapura	24.35	30.63	0.5
1985-07-28	Durgapura	24.72	31.31	0.4
1985-07-29	Durgapura	24.63	32.93	0.4
1985-07-30	Durgapura	23.86	28.92	0
1985-07-31	Durgapura	24.94	32.94	1.3
1985-08-01	Durgapura	24.55	32.48	0
1985-08-02	Durgapura	25.67	34.17	0
1985-08-03	Durgapura	25.24	33.85	0
1985-08-04	Durgapura	23.98	31.18	75.1
1985-08-05	Durgapura	24.24	29.67	16.4
1985-08-06	Durgapura	24.21	29.59	0.7
1985-08-07	Durgapura	23.9	28.76	0
1985-08-08	Durgapura	24.02	31.71	32.5
1985-08-09	Durgapura	23.95	31.17	0.6
1985-08-10	Durgapura	24.65	31.35	1
1985-08-11	Durgapura	24.54	31.13	6.2
1985-08-12	Durgapura	25.04	32.75	0
1985-08-13	Durgapura	24.97	33.33	0
1985-08-14	Durgapura	25.41	32.94	14.7
1985-08-15	Durgapura	24.26	33.11	18.4
1985-08-16	Durgapura	24.9	32.01	25.7
1985-08-17	Durgapura	24.98	32.23	0
1985-08-18	Durgapura	24.95	31.55	0.8
1985-08-19	Durgapura	24.21	30.9	0
1985-08-20	Durgapura	24.12	29.89	5.9
1985-08-21	Durgapura	24.01	30.62	0
1985-08-22	Durgapura	24.71	31.83	0
1985-08-23	Durgapura	24.13	31.83	0
1985-08-24	Durgapura	23.69	32.23	0
1985-08-25	Durgapura	23.37	31.82	0
1985-08-26	Durgapura	23.56	31.83	0
1985-08-27	Durgapura	23.44	31.92	0
1985-08-28	Durgapura	23.65	32.6	0
1985-08-29	Durgapura	23.73	33.64	0
1985-08-30	Durgapura	24.74	33.65	0
1985-08-31	Durgapura	24.74	32.72	0
1985-09-01	Durgapura	24.44	30.91	0
1985-09-02	Durgapura	24.5	30.92	0
1985-09-03	Durgapura	24.34	33.02	0
1985-09-04	Durgapura	24.03	33.27	0
1985-09-05	Durgapura	23.21	31.62	0
1985-09-06	Durgapura	22.86	31.73	0
1985-09-07	Durgapura	22.65	33.75	0
1985-09-08	Durgapura	23.4	34.41	0
1985-09-09	Durgapura	23	34.55	0
1985-09-10	Durgapura	23.03	35.17	0
1985-09-11	Durgapura	23.74	36.23	0
1985-09-12	Durgapura	23.88	36.05	0
1985-09-13	Durgapura	24.11	34.26	0
1985-09-14	Durgapura	23.37	34.27	0
1985-09-15	Durgapura	23.78	33.66	0
1985-09-16	Durgapura	22.96	34.63	0
1985-09-17	Durgapura	23.15	33.97	0
1985-09-18	Durgapura	23.52	33.79	0
1985-09-19	Durgapura	24.17	34.88	0
1985-09-20	Durgapura	24.22	35.85	0
1985-09-21	Durgapura	23.93	35.7	0
1985-09-22	Durgapura	24.78	34.31	0.7
1985-09-23	Durgapura	23.71	33.77	0.4
1985-09-24	Durgapura	23.34	32.27	9.2
1985-09-25	Durgapura	22.55	31.1	23.8
1985-09-26	Durgapura	22.96	32.78	0
1985-09-27	Durgapura	22.95	34.55	0
1985-09-28	Durgapura	22.97	36.05	0
1985-09-29	Durgapura	22.22	37.08	0
1985-09-30	Durgapura	21.79	37.21	0
1985-10-01	Durgapura	21.47	37.32	0
1985-10-02	Durgapura	21.06	37.64	0
1985-10-03	Durgapura	22.33	36.75	0
1985-10-04	Durgapura	23.22	36.07	0
1985-10-05	Durgapura	22.39	33.96	7.1
1985-10-06	Durgapura	22.06	30.21	15.6
1985-10-07	Durgapura	21.38	27.19	1.6
1985-10-08	Durgapura	20.49	26.87	4.3
1985-10-09	Durgapura	19.08	24.79	2.9
1985-10-10	Durgapura	18.91	26.3	0
1985-10-11	Durgapura	18.61	29.64	0
1985-10-12	Durgapura	18.37	29.91	0
1985-10-13	Durgapura	19.28	29.78	0
1985-10-14	Durgapura	18.77	30.77	0
1985-10-15	Durgapura	18.53	32.45	0
1985-10-16	Durgapura	17.77	33.7	0
1985-10-17	Durgapura	16.51	33.41	0
1985-10-18	Durgapura	15.78	32.28	0
1985-10-19	Durgapura	14.31	32.13	0
1985-10-20	Durgapura	14.67	32.61	0
1985-10-21	Durgapura	14.62	32.98	0
1985-10-22	Durgapura	13.86	32.93	0
1985-10-23	Durgapura	13.98	32.82	0
1985-10-24	Durgapura	14.94	33.05	0
1985-10-25	Durgapura	15.42	33.21	0
1985-10-26	Durgapura	16.04	33.38	0
1985-10-27	Durgapura	14.98	32.87	0
1985-10-28	Durgapura	14.4	32.92	0
1985-10-29	Durgapura	14.6	33.66	0
1985-10-30	Durgapura	14.57	33.56	0
1985-10-31	Durgapura	14.35	33.48	0
1985-11-01	Durgapura	14.26	33.03	0
1985-11-02	Durgapura	14.64	33.03	0
1985-11-03	Durgapura	15.43	33.2	0
1985-11-04	Durgapura	14.14	32.59	0
1985-11-05	Durgapura	13.59	31.49	0
1985-11-06	Durgapura	12.68	31.25	0
1985-11-07	Durgapura	13.66	31.66	0
1985-11-08	Durgapura	13.34	32.48	0
1985-11-09	Durgapura	13.91	32.25	0
1985-11-10	Durgapura	13.88	32.16	0
1985-11-11	Durgapura	14.64	31.31	0
1985-11-12	Durgapura	13.1	30.12	0
1985-11-13	Durgapura	12.72	30.62	0
1985-11-14	Durgapura	12.6	29.96	0
1985-11-15	Durgapura	11.18	29.57	0
1985-11-16	Durgapura	11.41	29.9	0
1985-11-17	Durgapura	10.63	29.33	0
1985-11-18	Durgapura	10.55	29.28	0
1985-11-19	Durgapura	12	29.59	0
1985-11-20	Durgapura	12.22	29.98	0
1985-11-21	Durgapura	11.86	30.17	0
1985-11-22	Durgapura	12	30.44	0
1985-11-23	Durgapura	12.13	29.54	0
1985-11-24	Durgapura	11.28	28.78	0
1985-11-25	Durgapura	11.74	29.1	0
1985-11-26	Durgapura	12.3	29.19	0
1985-11-27	Durgapura	12.42	28.88	0
1985-11-28	Durgapura	10.81	28.64	0
1985-11-29	Durgapura	10.95	28.37	0
1985-11-30	Durgapura	9.71	28.72	0
1985-12-01	Durgapura	10.02	28.52	0
1985-12-02	Durgapura	10.2	28.75	0
1985-12-03	Durgapura	9.34	28.17	0
1985-12-04	Durgapura	8.7	27.4	0
1985-12-05	Durgapura	8.21	28.02	0
1985-12-06	Durgapura	8.65	28.44	0
1985-12-07	Durgapura	10.51	28.76	0
1985-12-08	Durgapura	10.41	28.44	0
1985-12-09	Durgapura	8.23	26.84	0
1985-12-10	Durgapura	6.88	22.6	0
1985-12-11	Durgapura	9.4	23.04	0.1
1985-12-12	Durgapura	11.21	21.1	0
1985-12-13	Durgapura	12.73	23.21	0
1985-12-14	Durgapura	13.71	25.43	0
1985-12-15	Durgapura	14.9	27.08	0
1985-12-16	Durgapura	15.06	26.99	3
1985-12-17	Durgapura	15.26	25.17	0
1985-12-18	Durgapura	12.82	23.7	0
1985-12-19	Durgapura	9.44	24.31	0
1985-12-20	Durgapura	9.04	24.98	0
1985-12-21	Durgapura	8.67	25.84	0
1985-12-22	Durgapura	8.81	26.54	0
1985-12-23	Durgapura	9.5	26.45	0
1985-12-24	Durgapura	10.11	25.5	0
1985-12-25	Durgapura	11.38	24.98	0
1985-12-26	Durgapura	13.18	24.04	0
1985-12-27	Durgapura	13.39	24.66	1.3
1985-12-28	Durgapura	7.87	22.86	0
1985-12-29	Durgapura	7.09	21.7	0
1985-12-30	Durgapura	7.8	22.73	0
1985-12-31	Durgapura	6.28	22.05	0
1986-01-01	Durgapura	5.8	20.68	0
1986-01-02	Durgapura	5.35	21.12	0
1986-01-03	Durgapura	4.77	20.03	0
1986-01-04	Durgapura	3.77	20.43	0
1986-01-05	Durgapura	2.93	21.37	0
1986-01-06	Durgapura	2.82	22.59	0
1986-01-07	Durgapura	4.41	23	0
1986-01-08	Durgapura	4.06	22.32	0
1986-01-09	Durgapura	5.06	23.05	0
1986-01-10	Durgapura	7.06	23.8	0
1986-01-11	Durgapura	7.77	23.72	0
1986-01-12	Durgapura	7.74	22.52	0
1986-01-13	Durgapura	8.15	22.9	0
1986-01-14	Durgapura	7.8	23.67	0
1986-01-15	Durgapura	8.62	23.33	0
1986-01-16	Durgapura	6.88	23.02	0
1986-01-17	Durgapura	7.51	23.91	0
1986-01-18	Durgapura	7.85	23.71	0
1986-01-19	Durgapura	7.54	23.03	0
1986-01-20	Durgapura	9.44	22.21	0
1986-01-21	Durgapura	10.22	22.16	0
1986-01-22	Durgapura	10.6	24.8	0
1986-01-23	Durgapura	10.52	25.6	0
1986-01-24	Durgapura	7.4	24.35	0
1986-01-25	Durgapura	8.03	24.69	0
1986-01-26	Durgapura	8.62	24.82	0
1986-01-27	Durgapura	9.59	24.32	0
1986-01-28	Durgapura	10.38	24.29	0
1986-01-29	Durgapura	11.96	23.76	0
1986-01-30	Durgapura	12.14	21.86	0
1986-01-31	Durgapura	8.94	22.64	0
1986-02-01	Durgapura	6.51	22.68	0
1986-02-02	Durgapura	6.58	23.5	0
1986-02-03	Durgapura	7.73	24.54	0
1986-02-04	Durgapura	9.37	24.16	0.9
1986-02-05	Durgapura	10.42	25.38	0
1986-02-06	Durgapura	8.55	24.03	0
1986-02-07	Durgapura	8.41	24.07	0
1986-02-08	Durgapura	9.24	24.99	0.9
1986-02-09	Durgapura	11.29	23.1	1.2
1986-02-10	Durgapura	11.13	20.38	20
1986-02-11	Durgapura	10.66	20.78	0
1986-02-12	Durgapura	10.99	21.65	0
1986-02-13	Durgapura	11.55	22.09	0
1986-02-14	Durgapura	11.1	22.64	0
1986-02-15	Durgapura	9.86	22.86	17.6
1986-02-16	Durgapura	9.52	23.02	0
1986-02-17	Durgapura	9.1	24.06	0
1986-02-18	Durgapura	10.92	25.96	0
1986-02-19	Durgapura	12.28	27.34	0
1986-02-20	Durgapura	11.65	26.66	0
1986-02-21	Durgapura	12.76	26.23	0
1986-02-22	Durgapura	10.56	24.41	0
1986-02-23	Durgapura	9.59	23.68	0
1986-02-24	Durgapura	9.06	24.48	0
1986-02-25	Durgapura	9.42	25.67	0
1986-02-26	Durgapura	9.58	26.15	0
1986-02-27	Durgapura	10.49	27.1	0
1986-02-28	Durgapura	12.34	27.98	0
1986-03-01	Durgapura	12.55	28.68	0
1986-03-02	Durgapura	12.41	29.27	0
1986-03-03	Durgapura	12.07	29.59	0
1986-03-04	Durgapura	13.12	30.26	0
1986-03-05	Durgapura	14.14	31.68	0
1986-03-06	Durgapura	14.22	32.68	0
1986-03-07	Durgapura	16.33	33.64	0
1986-03-08	Durgapura	16.76	33.59	0
1986-03-09	Durgapura	17.87	33.69	0
1986-03-10	Durgapura	18.04	34.74	0
1986-03-11	Durgapura	19.09	35.84	0
1986-03-12	Durgapura	17.66	34.02	0
1986-03-13	Durgapura	16.88	34.02	0
1986-03-14	Durgapura	19.54	34.8	0
1986-03-15	Durgapura	16.08	31.31	0
1986-03-16	Durgapura	13.37	28.98	0
1986-03-17	Durgapura	14.49	29.68	0
1986-03-18	Durgapura	16.29	30.16	0
1986-03-19	Durgapura	14.02	29.2	0
1986-03-20	Durgapura	12.81	28.3	0
1986-03-21	Durgapura	13.71	28.63	0
1986-03-22	Durgapura	14.45	28.43	0
1986-03-23	Durgapura	14.6	29.45	0
1986-03-24	Durgapura	14.78	29.96	0
1986-03-25	Durgapura	13.19	29.31	0
1986-03-26	Durgapura	14.83	30.43	0
1986-03-27	Durgapura	15.65	33.27	0
1986-03-28	Durgapura	17.83	36.36	0
1986-03-29	Durgapura	18.43	37.08	0
1986-03-30	Durgapura	18.51	35.4	0
1986-03-31	Durgapura	17.09	34.48	0
1986-04-01	Durgapura	16.93	33.45	0
1986-04-02	Durgapura	16.49	34.35	0
1986-04-03	Durgapura	16.13	34.86	0
1986-04-04	Durgapura	16.05	34.1	0
1986-04-05	Durgapura	14.72	32.75	0
1986-04-06	Durgapura	16.53	34.22	0
1986-04-07	Durgapura	18.08	36.97	0
1986-04-08	Durgapura	20.25	38.85	0
1986-04-09	Durgapura	21.74	39.16	0
1986-04-10	Durgapura	21.48	38.83	0
1986-04-11	Durgapura	21.84	38.7	0
1986-04-12	Durgapura	22.95	39.3	0
1986-04-13	Durgapura	22.91	39.6	0
1986-04-14	Durgapura	22.61	39.69	0
1986-04-15	Durgapura	23.28	39.36	0
1986-04-16	Durgapura	23.37	39.35	0
1986-04-17	Durgapura	23.43	39.66	0
1986-04-18	Durgapura	23.45	39.57	0
1986-04-19	Durgapura	22.8	39.83	0
1986-04-20	Durgapura	23.73	40.62	0
1986-04-21	Durgapura	23.84	41.1	0
1986-04-22	Durgapura	24.25	41.99	0
1986-04-23	Durgapura	24.63	42.07	0
1986-04-24	Durgapura	26.18	41.89	0
1986-04-25	Durgapura	25.24	40.13	0
1986-04-26	Durgapura	24.6	38.64	0
1986-04-27	Durgapura	23.49	38.46	0
1986-04-28	Durgapura	23.28	38.13	0
1986-04-29	Durgapura	23.18	37.34	0
1986-04-30	Durgapura	22.63	38.55	0
1986-05-01	Durgapura	24.09	39.9	0
1986-05-02	Durgapura	25.7	41.53	0
1986-05-03	Durgapura	25.14	41.01	0
1986-05-04	Durgapura	23.47	39.73	0
1986-05-05	Durgapura	23.66	39.91	0
1986-05-06	Durgapura	25.11	42.01	0
1986-05-07	Durgapura	25.66	43.61	0
1986-05-08	Durgapura	26.92	42.99	0
1986-05-09	Durgapura	26.62	42.13	0
1986-05-10	Durgapura	24.33	40.25	0
1986-05-11	Durgapura	23.93	39.57	0
1986-05-12	Durgapura	26.04	40.24	0
1986-05-13	Durgapura	27.24	42.17	0
1986-05-14	Durgapura	26.68	42.21	5.4
1986-05-15	Durgapura	26.19	42.03	7
1986-05-16	Durgapura	28	43.22	0
1986-05-17	Durgapura	27.63	42.91	0
1986-05-18	Durgapura	27.74	42.51	0
1986-05-19	Durgapura	28.06	41.4	0
1986-05-20	Durgapura	24.08	38.67	0
1986-05-21	Durgapura	21.82	39.15	0
1986-05-22	Durgapura	21.99	38.08	0.2
1986-05-23	Durgapura	21.44	39.01	0
1986-05-24	Durgapura	23.55	39.93	0
1986-05-25	Durgapura	25.58	41.07	0
1986-05-26	Durgapura	26.05	41.23	0
1986-05-27	Durgapura	21.4	39.39	2.5
1986-05-28	Durgapura	21.44	35.36	0
1986-05-29	Durgapura	21.18	35.68	11.2
1986-05-30	Durgapura	22.95	35.69	0
1986-05-31	Durgapura	24.52	37.11	0
1986-06-01	Durgapura	23.77	37.27	0.9
1986-06-02	Durgapura	25.06	38.52	0
1986-06-03	Durgapura	25.21	40.09	1.7
1986-06-04	Durgapura	25.44	40.35	1.7
1986-06-05	Durgapura	26.14	40.17	0
1986-06-06	Durgapura	25.55	40.64	0
1986-06-07	Durgapura	27	40.66	0
1986-06-08	Durgapura	26.35	41.81	0
1986-06-09	Durgapura	25.76	42.67	0
1986-06-10	Durgapura	26.85	44.16	0
1986-06-11	Durgapura	30.02	43.98	0
1986-06-12	Durgapura	30.6	43.45	0
1986-06-13	Durgapura	30.32	42.84	0
1986-06-14	Durgapura	29.81	43.14	0
1986-06-15	Durgapura	28.49	42.49	0
1986-06-16	Durgapura	29.5	43.87	0
1986-06-17	Durgapura	30.4	44.09	0
1986-06-18	Durgapura	30.58	43.92	0
1986-06-19	Durgapura	30.27	43.09	0
1986-06-20	Durgapura	29.08	41.93	0
1986-06-21	Durgapura	26.47	39.5	9.6
1986-06-22	Durgapura	26.57	38.47	0
1986-06-23	Durgapura	27.07	38.53	0
1986-06-24	Durgapura	25.49	37.81	11.7
1986-06-25	Durgapura	25.31	34.36	0
1986-06-26	Durgapura	26.32	34.23	0
1986-06-27	Durgapura	26.75	34.17	0
1986-06-28	Durgapura	26.11	34.5	0
1986-06-29	Durgapura	25.39	35.39	0
1986-06-30	Durgapura	24.72	35.19	0
1986-07-01	Durgapura	24.56	35.43	0
1986-07-02	Durgapura	25.58	35.95	5.7
1986-07-03	Durgapura	25.3	36.26	0
1986-07-04	Durgapura	26.48	36.76	0
1986-07-05	Durgapura	27.45	36.72	0
1986-07-06	Durgapura	27.34	36.3	0
1986-07-07	Durgapura	27.34	37.56	0
1986-07-08	Durgapura	27.08	37.04	0.9
1986-07-09	Durgapura	24.22	35.19	1
1986-07-10	Durgapura	23.26	33.88	15.7
1986-07-11	Durgapura	25.3	33.83	0
1986-07-12	Durgapura	25.51	35.83	0
1986-07-13	Durgapura	27.42	37.23	0.3
1986-07-14	Durgapura	26.59	38.05	4.1
1986-07-15	Durgapura	26.29	37.27	0
1986-07-16	Durgapura	27.14	37.64	0
1986-07-17	Durgapura	27.35	38.4	0
1986-07-18	Durgapura	26.94	36.74	1.4
1986-07-19	Durgapura	25.32	35.8	1.5
1986-07-20	Durgapura	23.66	34.52	22
1986-07-21	Durgapura	24.67	33.52	2
1986-07-22	Durgapura	24.04	33.52	10.2
1986-07-23	Durgapura	24.48	32.47	20.9
1986-07-24	Durgapura	24.66	32.02	17.9
1986-07-25	Durgapura	24.38	31.13	0
1986-07-26	Durgapura	23.88	30.05	18.8
1986-07-27	Durgapura	23.23	29.93	53.5
1986-07-28	Durgapura	22.55	29.23	32.1
1986-07-29	Durgapura	21.55	29.37	17.1
1986-07-30	Durgapura	22.6	29.5	0.2
1986-07-31	Durgapura	23.48	31.1	0.2
1986-08-01	Durgapura	24.04	31.53	0.1
1986-08-02	Durgapura	23.98	31.38	0
1986-08-03	Durgapura	24.06	32.26	0
1986-08-04	Durgapura	24.31	32.62	0
1986-08-05	Durgapura	24.98	32.95	0
1986-08-06	Durgapura	24.95	34.01	4.7
1986-08-07	Durgapura	24.45	32.94	1.1
1986-08-08	Durgapura	24.93	33.03	3.9
1986-08-09	Durgapura	25.39	33.49	0
1986-08-10	Durgapura	25.41	33.64	0.8
1986-08-11	Durgapura	25.39	34.02	0
1986-08-12	Durgapura	24.59	35.29	0.8
1986-08-13	Durgapura	24.22	32.53	0.3
1986-08-14	Durgapura	24.06	31.33	9.3
1986-08-15	Durgapura	24.42	32.11	0.8
1986-08-16	Durgapura	24.31	32.11	4.1
1986-08-17	Durgapura	23.96	32.1	13.6
1986-08-18	Durgapura	23.62	31.94	0
1986-08-19	Durgapura	23.79	30.89	0
1986-08-20	Durgapura	23.32	31.33	0
1986-08-21	Durgapura	24.02	32.19	0
1986-08-22	Durgapura	23.13	31.99	0
1986-08-23	Durgapura	23.45	32.34	0
1986-08-24	Durgapura	22.93	32.41	0
1986-08-25	Durgapura	22.61	32.78	0
1986-08-26	Durgapura	22.45	32.73	0
1986-08-27	Durgapura	22.3	32.59	0
1986-08-28	Durgapura	22.64	33.45	0
1986-08-29	Durgapura	23.38	34.61	0
1986-08-30	Durgapura	23.62	35.51	0
1986-08-31	Durgapura	23.32	35.03	0
1986-09-01	Durgapura	23.2	35.05	0
1986-09-02	Durgapura	24.08	35.47	0
1986-09-03	Durgapura	23.18	35.6	0
1986-09-04	Durgapura	23.05	35.02	0
1986-09-05	Durgapura	22.96	35.1	0
1986-09-06	Durgapura	23.67	36.27	0
1986-09-07	Durgapura	24.49	37.06	0
1986-09-08	Durgapura	24.84	37.12	0
1986-09-09	Durgapura	24.21	36.91	2.5
1986-09-10	Durgapura	24.09	36.53	0
1986-09-11	Durgapura	24.89	36.84	0
1986-09-12	Durgapura	24.8	36.75	0.2
1986-09-13	Durgapura	24.19	36.46	0
1986-09-14	Durgapura	23.62	35.5	0
1986-09-15	Durgapura	23.03	35.16	0.1
1986-09-16	Durgapura	22.68	35.25	0
1986-09-17	Durgapura	23.34	36.48	0
1986-09-18	Durgapura	23.25	37.25	0
1986-09-19	Durgapura	23.83	37.68	0
1986-09-20	Durgapura	24.24	37.64	0
1986-09-21	Durgapura	23.01	37.41	0
1986-09-22	Durgapura	24.02	37.84	0
1986-09-23	Durgapura	22.8	37.58	0
1986-09-24	Durgapura	23.1	36.92	0
1986-09-25	Durgapura	22.37	35.52	1.7
1986-09-26	Durgapura	20.85	34.31	1.5
1986-09-27	Durgapura	21.32	33	12.2
1986-09-28	Durgapura	20.08	31.64	2.2
1986-09-29	Durgapura	20.38	31.04	0.6
1986-09-30	Durgapura	21.42	32.57	0
1986-10-01	Durgapura	21.23	33.41	3.4
1986-10-02	Durgapura	21.65	33.96	0
1986-10-03	Durgapura	22.05	34.47	0
1986-10-04	Durgapura	22.3	34.83	0
1986-10-05	Durgapura	22.73	35.14	0
1986-10-06	Durgapura	22.31	34.84	0
1986-10-07	Durgapura	21.84	35.16	0
1986-10-08	Durgapura	22.81	36.82	0
1986-10-09	Durgapura	22.33	37.24	0
1986-10-10	Durgapura	23.2	36.96	0
1986-10-11	Durgapura	23.12	37.32	0
1986-10-12	Durgapura	22.84	37.42	0
1986-10-13	Durgapura	21.77	37.01	0
1986-10-14	Durgapura	21.34	37.49	0
1986-10-15	Durgapura	21.55	37.55	0
1986-10-16	Durgapura	21	37.1	0.5
1986-10-17	Durgapura	21.38	34.19	0
1986-10-18	Durgapura	18.1	32.81	0
1986-10-19	Durgapura	19.27	32.11	0
1986-10-20	Durgapura	19.3	32.54	0
1986-10-21	Durgapura	16.66	31.96	0
1986-10-22	Durgapura	15.06	32.14	0
1986-10-23	Durgapura	15.86	32.58	0
1986-10-24	Durgapura	15.58	33.09	0
1986-10-25	Durgapura	15.32	32.59	0
1986-10-26	Durgapura	15	32.5	0
1986-10-27	Durgapura	15.17	32.83	0
1986-10-28	Durgapura	14.85	33.94	0
1986-10-29	Durgapura	15.36	34.8	0
1986-10-30	Durgapura	16.23	34.86	0
1986-10-31	Durgapura	16.46	34.87	0
1986-11-01	Durgapura	16.81	34.39	0
1986-11-02	Durgapura	16.88	34.04	0
1986-11-03	Durgapura	18.16	33.01	0
1986-11-04	Durgapura	18.12	31.9	0
1986-11-05	Durgapura	15.42	31.75	0
1986-11-06	Durgapura	13.81	31.72	0
1986-11-07	Durgapura	13.97	31.71	0
1986-11-08	Durgapura	14.1	31.14	0
1986-11-09	Durgapura	13.18	30.43	0
1986-11-10	Durgapura	13.51	30.9	0
1986-11-11	Durgapura	13.65	32.15	0
1986-11-12	Durgapura	15.7	33.22	0
1986-11-13	Durgapura	16.05	32.84	0
1986-11-14	Durgapura	15.33	32.82	0
1986-11-15	Durgapura	16.12	32.84	0
1986-11-16	Durgapura	16.97	32.1	0
1986-11-17	Durgapura	16	30.99	0
1986-11-18	Durgapura	11.52	28.38	0
1986-11-19	Durgapura	9.79	28.13	0
1986-11-20	Durgapura	9.59	28.23	0
1986-11-21	Durgapura	10.14	28.94	0
1986-11-22	Durgapura	10.77	29.44	0
1986-11-23	Durgapura	11.02	30.54	0
1986-11-24	Durgapura	10.91	30.76	0
1986-11-25	Durgapura	13.11	29.87	0
1986-11-26	Durgapura	14.3	29.46	0
1986-11-27	Durgapura	13.77	29.46	0
1986-11-28	Durgapura	13.18	27.72	0
1986-11-29	Durgapura	10.83	26.06	0
1986-11-30	Durgapura	9.01	25.2	0
1986-12-01	Durgapura	9.35	24.79	0
1986-12-02	Durgapura	8.82	25.04	0
1986-12-03	Durgapura	8.42	26.14	0
1986-12-04	Durgapura	8.47	27.38	0
1986-12-05	Durgapura	8.03	28.05	0
1986-12-06	Durgapura	8.06	28.57	0
1986-12-07	Durgapura	8.93	28.83	0
1986-12-08	Durgapura	9.8	27.6	0
1986-12-09	Durgapura	9.85	26.95	0
1986-12-10	Durgapura	10.76	27.28	0
1986-12-11	Durgapura	11.59	27.18	0
1986-12-12	Durgapura	11.4	26.47	0
1986-12-13	Durgapura	11.48	24.55	0
1986-12-14	Durgapura	6.39	22.63	0
1986-12-15	Durgapura	2.68	19.54	0
1986-12-16	Durgapura	3.74	18.55	0
1986-12-17	Durgapura	3.75	18.92	0
1986-12-18	Durgapura	4.78	19.4	0
1986-12-19	Durgapura	4.11	19.73	0
1986-12-20	Durgapura	3.31	19.77	0
1986-12-21	Durgapura	3.92	20.42	0
1986-12-22	Durgapura	4.65	20.89	0
1986-12-23	Durgapura	4.4	21.7	0
1986-12-24	Durgapura	4.11	20.73	0
1986-12-25	Durgapura	4.04	20.7	0
1986-12-26	Durgapura	4.15	21.39	0
1986-12-27	Durgapura	5.69	23.18	0
1986-12-28	Durgapura	5.85	23.57	0
1986-12-29	Durgapura	4.74	23.36	0
1986-12-30	Durgapura	5.1	23.39	0
1986-12-31	Durgapura	4.05	23.15	0
1987-01-01	Durgapura	4.19	23.14	0
1987-01-02	Durgapura	5.42	24.39	0
1987-01-03	Durgapura	6.89	25.05	0
1987-01-04	Durgapura	9.9	24.45	0
1987-01-05	Durgapura	10.05	25.7	0
1987-01-06	Durgapura	9.53	24.28	0
1987-01-07	Durgapura	8.07	23.69	0
1987-01-08	Durgapura	10.89	24.69	0
1987-01-09	Durgapura	10.79	22.52	0
1987-01-10	Durgapura	11.29	21.22	0
1987-01-11	Durgapura	11.67	21.84	0
1987-01-12	Durgapura	9.6	21.19	0
1987-01-13	Durgapura	9.27	21.87	0
1987-01-14	Durgapura	9.09	22.76	0
1987-01-15	Durgapura	7.83	22.63	0.1
1987-01-16	Durgapura	10.44	21.84	7
1987-01-17	Durgapura	10.87	19.77	11.3
1987-01-18	Durgapura	8.1	19.16	0
1987-01-19	Durgapura	6.28	19.48	0
1987-01-20	Durgapura	6.57	20.62	0
1987-01-21	Durgapura	6.31	21.88	0
1987-01-22	Durgapura	6.22	23.33	0
1987-01-23	Durgapura	7.01	24.3	0
1987-01-24	Durgapura	6.43	23.97	0
1987-01-25	Durgapura	5.71	23.78	0
1987-01-26	Durgapura	5.22	25.01	0
1987-01-27	Durgapura	6.57	25.49	0
1987-01-28	Durgapura	7.04	26.11	0
1987-01-29	Durgapura	7.35	26.88	0
1987-01-30	Durgapura	8.79	26.99	0
1987-01-31	Durgapura	9.89	27.48	0
1987-02-01	Durgapura	10.73	28.03	0
1987-02-02	Durgapura	10.38	27.64	0
1987-02-03	Durgapura	9.91	26.38	0
1987-02-04	Durgapura	9.09	26.71	0
1987-02-05	Durgapura	8.75	26.57	0
1987-02-06	Durgapura	8.38	27.63	0
1987-02-07	Durgapura	9.32	28.63	0
1987-02-08	Durgapura	9.79	28.8	0
1987-02-09	Durgapura	10.03	29.25	0
1987-02-10	Durgapura	9.52	27.11	0
1987-02-11	Durgapura	8.75	27.05	0
1987-02-12	Durgapura	8.86	27.47	0
1987-02-13	Durgapura	9.83	27.9	0
1987-02-14	Durgapura	12.57	28.82	0
1987-02-15	Durgapura	12.97	29.11	0
1987-02-16	Durgapura	12.85	28.87	0
1987-02-17	Durgapura	11.47	27.42	0
1987-02-18	Durgapura	12.56	28.55	0
1987-02-19	Durgapura	13.15	28.92	0
1987-02-20	Durgapura	14.13	28.53	0
1987-02-21	Durgapura	13.55	29.76	0
1987-02-22	Durgapura	14.05	29.86	0
1987-02-23	Durgapura	14	30.38	0.2
1987-02-24	Durgapura	15.03	30.59	10
1987-02-25	Durgapura	12.97	28.67	0
1987-02-26	Durgapura	12.43	26.82	0
1987-02-27	Durgapura	10.85	26.71	0
1987-02-28	Durgapura	10.81	26.24	0
1987-03-01	Durgapura	11.05	27.41	0
1987-03-02	Durgapura	11.63	28.59	0
1987-03-03	Durgapura	13.31	30	0
1987-03-04	Durgapura	13.43	31.59	0
1987-03-05	Durgapura	15.52	32.5	0
1987-03-06	Durgapura	16.3	32.64	0
1987-03-07	Durgapura	15.97	33.73	0
1987-03-08	Durgapura	15.95	32.77	0
1987-03-09	Durgapura	15.42	32.22	0
1987-03-10	Durgapura	14.87	31.66	0
1987-03-11	Durgapura	16.27	30	0
1987-03-12	Durgapura	13.89	29.48	0
1987-03-13	Durgapura	15.15	29.28	0.2
1987-03-14	Durgapura	15.84	31.15	0
1987-03-15	Durgapura	16.76	32.94	0
1987-03-16	Durgapura	19.4	34.31	0
1987-03-17	Durgapura	16.91	33.85	0
1987-03-18	Durgapura	16.57	33.35	0
1987-03-19	Durgapura	18.42	34.12	0
1987-03-20	Durgapura	17.38	33.75	0
1987-03-21	Durgapura	17.6	33.26	0
1987-03-22	Durgapura	20.06	34.4	0
1987-03-23	Durgapura	18.61	34.37	0
1987-03-24	Durgapura	18.54	34.23	0.2
1987-03-25	Durgapura	19.1	35.03	0
1987-03-26	Durgapura	19.33	35.88	0
1987-03-27	Durgapura	18.36	35.19	0
1987-03-28	Durgapura	17.56	33.12	0
1987-03-29	Durgapura	18.49	34.22	0
1987-03-30	Durgapura	17.97	34.98	0
1987-03-31	Durgapura	18.88	35.19	0
1987-04-01	Durgapura	20.2	36.03	0
1987-04-02	Durgapura	20.67	35.54	0
1987-04-03	Durgapura	20.63	35.8	0
1987-04-04	Durgapura	20.13	36.69	0
1987-04-05	Durgapura	20.23	36.54	0
1987-04-06	Durgapura	19.47	36.94	0
1987-04-07	Durgapura	20.94	37.78	0
1987-04-08	Durgapura	22.71	37.07	0
1987-04-09	Durgapura	21.54	36.67	0
1987-04-10	Durgapura	18.89	35.36	0
1987-04-11	Durgapura	17.5	35.49	0
1987-04-12	Durgapura	18.33	35.43	0
1987-04-13	Durgapura	18.33	35.8	0
1987-04-14	Durgapura	18.33	36.28	0
1987-04-15	Durgapura	18.95	37.09	0
1987-04-16	Durgapura	19.89	37.92	0
1987-04-17	Durgapura	19.99	38.44	0
1987-04-18	Durgapura	21.42	40	0
1987-04-19	Durgapura	21.47	41.06	0
1987-04-20	Durgapura	24.34	41.16	0
1987-04-21	Durgapura	23.84	41.24	0
1987-04-22	Durgapura	24.48	41.13	0
1987-04-23	Durgapura	24.2	40.91	0
1987-04-24	Durgapura	23.01	39.99	0
1987-04-25	Durgapura	21.61	38.78	0
1987-04-26	Durgapura	20.76	39.16	0
1987-04-27	Durgapura	21.12	39.69	0
1987-04-28	Durgapura	22.4	39.7	0
1987-04-29	Durgapura	23.71	40.25	0
1987-04-30	Durgapura	25.82	40.88	0
1987-05-01	Durgapura	24.89	39.89	0
1987-05-02	Durgapura	22.87	36.44	0.1
1987-05-03	Durgapura	20.24	34.28	0
1987-05-04	Durgapura	19.93	34.56	0
1987-05-05	Durgapura	21.49	36.37	0
1987-05-06	Durgapura	25	38.8	0
1987-05-07	Durgapura	21.3	37.74	13.6
1987-05-08	Durgapura	20.14	35.38	12.3
1987-05-09	Durgapura	18.21	33.08	15.9
1987-05-10	Durgapura	20.45	32.81	0
1987-05-11	Durgapura	21.52	34.55	0
1987-05-12	Durgapura	22.59	37.57	0
1987-05-13	Durgapura	23.19	37.78	0
1987-05-14	Durgapura	22.8	36.79	0
1987-05-15	Durgapura	23.55	37.36	0
1987-05-16	Durgapura	23.61	37.64	0
1987-05-17	Durgapura	23.66	38.68	0
1987-05-18	Durgapura	23.97	39.55	0
1987-05-19	Durgapura	25.65	40.91	0
1987-05-20	Durgapura	27.07	42.23	0
1987-05-21	Durgapura	27.49	42.32	0
1987-05-22	Durgapura	27.14	42.26	0
1987-05-23	Durgapura	25.49	40.86	0
1987-05-24	Durgapura	24.3	39.11	0
1987-05-25	Durgapura	25.07	40.05	0
1987-05-26	Durgapura	25.9	41.56	0
1987-05-27	Durgapura	26.93	42.71	0
1987-05-28	Durgapura	27.34	41.85	0
1987-05-29	Durgapura	26.37	41.33	0
1987-05-30	Durgapura	25.79	40.51	0
1987-05-31	Durgapura	27.48	41.08	0
1987-06-01	Durgapura	27.12	42.03	0
1987-06-02	Durgapura	28.76	42.84	0
1987-06-03	Durgapura	29.65	43.4	0
1987-06-04	Durgapura	27.75	43.64	0
1987-06-05	Durgapura	27.98	42.72	0
1987-06-06	Durgapura	28.26	43.84	0
1987-06-07	Durgapura	28.86	44.41	0
1987-06-08	Durgapura	30.31	44.59	0
1987-06-09	Durgapura	26.93	42.38	0
1987-06-10	Durgapura	26.97	39.14	0
1987-06-11	Durgapura	25.53	38.35	3
1987-06-12	Durgapura	24.26	37.08	16.4
1987-06-13	Durgapura	24.88	37.08	0
1987-06-14	Durgapura	25.76	38.11	0
1987-06-15	Durgapura	27.39	39.69	0
1987-06-16	Durgapura	26.44	40.18	0
1987-06-17	Durgapura	26.37	38.37	26.6
1987-06-18	Durgapura	26.7	40.16	0
1987-06-19	Durgapura	27.89	41.66	0
1987-06-20	Durgapura	28.32	42.06	0
1987-06-21	Durgapura	27.61	41.6	0
1987-06-22	Durgapura	28.39	40.49	0
1987-06-23	Durgapura	26.65	39.53	32.3
1987-06-24	Durgapura	25.91	39.71	0
1987-06-25	Durgapura	26.67	40.35	0
1987-06-26	Durgapura	27.93	40.78	0
1987-06-27	Durgapura	27.95	42.03	0
1987-06-28	Durgapura	28.06	42.4	0
1987-06-29	Durgapura	28.4	42.94	0
1987-06-30	Durgapura	28.74	41.51	0
1987-07-01	Durgapura	28.29	40.47	1.9
1987-07-02	Durgapura	26.95	40.85	0
1987-07-03	Durgapura	27.84	40.46	4
1987-07-04	Durgapura	28.1	39.54	0
1987-07-05	Durgapura	28.38	40.01	0
1987-07-06	Durgapura	27.63	39.44	0
1987-07-07	Durgapura	26.35	39.47	0
1987-07-08	Durgapura	24.4	38.65	0
1987-07-09	Durgapura	26.03	38.6	0
1987-07-10	Durgapura	25.64	37.65	0
1987-07-11	Durgapura	26.85	36.71	0
1987-07-12	Durgapura	26.32	37.88	15.1
1987-07-13	Durgapura	26.18	37.34	0.2
1987-07-14	Durgapura	24.78	37.83	5.6
1987-07-15	Durgapura	24.77	35.51	8.1
1987-07-16	Durgapura	25.81	36.6	0
1987-07-17	Durgapura	25.59	37.41	1.2
1987-07-18	Durgapura	26.69	37.35	0
1987-07-19	Durgapura	27.48	38.44	0
1987-07-20	Durgapura	28.32	38.53	0
1987-07-21	Durgapura	27.34	38.95	0
1987-07-22	Durgapura	28.34	39.58	0
1987-07-23	Durgapura	28.02	39.18	0
1987-07-24	Durgapura	28.25	38.78	0
1987-07-25	Durgapura	28.07	38.05	0
1987-07-26	Durgapura	27.96	37.35	0
1987-07-27	Durgapura	27.52	36.72	0
1987-07-28	Durgapura	27.74	37.41	0
1987-07-29	Durgapura	28.2	38.69	0
1987-07-30	Durgapura	27.65	39.61	0
1987-07-31	Durgapura	27.73	39.69	0
1987-08-01	Durgapura	27.74	39.79	0
1987-08-02	Durgapura	26.9	39.7	0
1987-08-03	Durgapura	27.57	39.68	0
1987-08-04	Durgapura	28	38.79	0
1987-08-05	Durgapura	27.09	38.87	12.6
1987-08-06	Durgapura	26.19	38.5	3.5
1987-08-07	Durgapura	25.48	34.26	46
1987-08-08	Durgapura	25.52	33.67	1
1987-08-09	Durgapura	27.49	36.83	0
1987-08-10	Durgapura	27.72	38.16	0
1987-08-11	Durgapura	28.39	39.23	0
1987-08-12	Durgapura	27.06	37.48	0
1987-08-13	Durgapura	26.02	36.32	0
1987-08-14	Durgapura	24	35.58	2.2
1987-08-15	Durgapura	23.8	35.8	5.9
1987-08-16	Durgapura	26.07	35.62	0
1987-08-17	Durgapura	26.76	36.49	0
1987-08-18	Durgapura	27.29	37.51	0.6
1987-08-19	Durgapura	24.73	37.3	21.5
1987-08-20	Durgapura	25.84	36.99	0
1987-08-21	Durgapura	24.49	37.34	1.7
1987-08-22	Durgapura	25.12	35.91	0
1987-08-23	Durgapura	25.5	35.42	1.1
1987-08-24	Durgapura	24.17	33.55	4
1987-08-25	Durgapura	25.27	33.28	1.2
1987-08-26	Durgapura	25.66	34.35	0
1987-08-27	Durgapura	25.53	34.72	0
1987-08-28	Durgapura	24.23	35	19.6
1987-08-29	Durgapura	24.26	31.51	12.9
1987-08-30	Durgapura	24.34	32	10.2
1987-08-31	Durgapura	24.55	32.69	6.5
1987-09-01	Durgapura	24.93	34.29	3.3
1987-09-02	Durgapura	25.29	34.46	0
1987-09-03	Durgapura	25.17	34.84	0
1987-09-04	Durgapura	25.3	35.03	0
1987-09-05	Durgapura	24.67	35.33	0
1987-09-06	Durgapura	25.11	34.84	0
1987-09-07	Durgapura	25.43	35.97	0
1987-09-08	Durgapura	25.89	35.19	0
1987-09-09	Durgapura	25.3	35.46	0
1987-09-10	Durgapura	25.18	35.29	0
1987-09-11	Durgapura	25.01	35.39	0
1987-09-12	Durgapura	25.71	36.13	0
1987-09-13	Durgapura	25.29	37.06	0
1987-09-14	Durgapura	24.37	37.61	0
1987-09-15	Durgapura	24.69	37.53	0
1987-09-16	Durgapura	24.26	37.23	0
1987-09-17	Durgapura	24.74	37.01	0
1987-09-18	Durgapura	23.74	35.91	13.2
1987-09-19	Durgapura	24.4	36.75	0.7
1987-09-20	Durgapura	24.37	37.77	0
1987-09-21	Durgapura	24.36	38.46	0
1987-09-22	Durgapura	24.25	37.69	0
1987-09-23	Durgapura	24.37	37.86	0
1987-09-24	Durgapura	24.72	38.19	0
1987-09-25	Durgapura	24.67	39.12	0
1987-09-26	Durgapura	26.2	40.01	0
1987-09-27	Durgapura	24.49	39.41	0
1987-09-28	Durgapura	24.42	38.49	0
1987-09-29	Durgapura	23.97	37.9	0
1987-09-30	Durgapura	23.21	38.09	0
1987-10-01	Durgapura	23.03	38.11	0
1987-10-02	Durgapura	23.35	38.96	0
1987-10-03	Durgapura	24.64	38.83	0
1987-10-04	Durgapura	22.79	38.37	0
1987-10-05	Durgapura	21.52	37.71	0
1987-10-06	Durgapura	22.09	36.78	0
1987-10-07	Durgapura	21.84	37.1	0
1987-10-08	Durgapura	21.88	37.96	0
1987-10-09	Durgapura	22.63	38.11	0
1987-10-10	Durgapura	21.91	38.15	0
1987-10-11	Durgapura	22.75	38.83	0
1987-10-12	Durgapura	23.38	38.27	0
1987-10-13	Durgapura	21.62	37.68	0
1987-10-14	Durgapura	20.89	37.58	0
1987-10-15	Durgapura	21.26	36.76	0
1987-10-16	Durgapura	22.14	36.54	0
1987-10-17	Durgapura	22.3	36.67	0
1987-10-18	Durgapura	21.23	34.36	0
1987-10-19	Durgapura	20.67	32.71	0
1987-10-20	Durgapura	16.78	31.25	0
1987-10-21	Durgapura	16.25	31.35	0
1987-10-22	Durgapura	16.12	32.35	0
1987-10-23	Durgapura	16.75	33.5	0
1987-10-24	Durgapura	17.31	34.09	0
1987-10-25	Durgapura	17.24	34.82	0
1987-10-26	Durgapura	17.73	35.05	0
1987-10-27	Durgapura	17.91	34.87	0
1987-10-28	Durgapura	18.3	35.79	0
1987-10-29	Durgapura	18.99	36.53	0
1987-10-30	Durgapura	19.16	36.49	0
1987-10-31	Durgapura	17.96	35.83	0
1987-11-01	Durgapura	17.57	35.55	0
1987-11-02	Durgapura	14.93	33.24	0
1987-11-03	Durgapura	14.21	32.47	0
1987-11-04	Durgapura	13.23	31.44	0
1987-11-05	Durgapura	13.28	30.94	0
1987-11-06	Durgapura	13.09	30.8	0
1987-11-07	Durgapura	12.96	31.43	0
1987-11-08	Durgapura	13.19	32.58	0
1987-11-09	Durgapura	13.29	32.19	0
1987-11-10	Durgapura	13.56	31.73	0
1987-11-11	Durgapura	12.74	31.85	0
1987-11-12	Durgapura	13.3	32.33	0
1987-11-13	Durgapura	13.15	32.37	0
1987-11-14	Durgapura	13.07	31.19	0
1987-11-15	Durgapura	12.28	31.25	0
1987-11-16	Durgapura	11.99	30.99	0
1987-11-17	Durgapura	11.74	30.83	0
1987-11-18	Durgapura	11.9	30.72	0
1987-11-19	Durgapura	12.41	30.57	0
1987-11-20	Durgapura	11.42	30.23	0
1987-11-21	Durgapura	10.77	30.13	0
1987-11-22	Durgapura	9.74	30.09	0
1987-11-23	Durgapura	9.9	30.35	0
1987-11-24	Durgapura	10.11	30.52	0
1987-11-25	Durgapura	10.45	30.92	0
1987-11-26	Durgapura	10.63	30.8	0
1987-11-27	Durgapura	11.21	30.94	0
1987-11-28	Durgapura	10.4	30.26	0
1987-11-29	Durgapura	10.36	29.58	0
1987-11-30	Durgapura	10.18	29.1	0
1987-12-01	Durgapura	10.21	29.44	0
1987-12-02	Durgapura	12.05	29.72	0
1987-12-03	Durgapura	11.82	29.59	0
1987-12-04	Durgapura	10.7	27.23	0
1987-12-05	Durgapura	7.67	26.26	0
1987-12-06	Durgapura	6.45	26.01	0
1987-12-07	Durgapura	6.19	25.18	0
1987-12-08	Durgapura	6.52	25.22	0
1987-12-09	Durgapura	6.46	25.09	0
1987-12-10	Durgapura	8.04	24.41	0
1987-12-11	Durgapura	12.07	25.41	0
1987-12-12	Durgapura	11.29	23.15	19.9
1987-12-13	Durgapura	9.33	20.91	0
1987-12-14	Durgapura	7.97	23.08	0
1987-12-15	Durgapura	7.83	24.71	0
1987-12-16	Durgapura	7.99	25.31	0
1987-12-17	Durgapura	8.19	25.28	0
1987-12-18	Durgapura	8.32	25.5	0
1987-12-19	Durgapura	7.69	25.78	0
1987-12-20	Durgapura	7.4	25.42	0
1987-12-21	Durgapura	8.2	24.88	0
1987-12-22	Durgapura	8.83	24.37	0
1987-12-23	Durgapura	7.8	24.99	0
1987-12-24	Durgapura	7.57	25.13	0
1987-12-25	Durgapura	7.78	25.35	0
1987-12-26	Durgapura	8.05	25.5	0
1987-12-27	Durgapura	7.89	24.95	0
1987-12-28	Durgapura	7.14	24.59	0
1987-12-29	Durgapura	6.87	24.57	0
1987-12-30	Durgapura	8.11	24.36	0
1987-12-31	Durgapura	8.36	25.01	0
1988-01-01	Durgapura	7.97	25.4	0
1988-01-02	Durgapura	9.24	25.98	0
1988-01-03	Durgapura	9.07	24.24	0
1988-01-04	Durgapura	9.41	24.69	0
1988-01-05	Durgapura	9.29	25.03	0
1988-01-06	Durgapura	9.03	24.82	0
1988-01-07	Durgapura	8.78	25.52	0
1988-01-08	Durgapura	8	24.47	0
1988-01-09	Durgapura	8.91	24.92	0
1988-01-10	Durgapura	9.77	25.37	0
1988-01-11	Durgapura	10.8	25.59	0
1988-01-12	Durgapura	11.07	24.06	3.4
1988-01-13	Durgapura	10.75	23.28	0
1988-01-14	Durgapura	10.2	23.38	0
1988-01-15	Durgapura	9.37	23.45	0
1988-01-16	Durgapura	9.21	23.81	0
1988-01-17	Durgapura	8.23	23.74	0
1988-01-18	Durgapura	6.75	23.86	0
1988-01-19	Durgapura	6.96	24.82	0
1988-01-20	Durgapura	7.39	25.17	0
1988-01-21	Durgapura	8.63	26.21	0
1988-01-22	Durgapura	10.02	26.35	0
1988-01-23	Durgapura	8.45	25.86	0
1988-01-24	Durgapura	7.4	24.7	0
1988-01-25	Durgapura	6.26	23.53	0
1988-01-26	Durgapura	4.8	22.99	0
1988-01-27	Durgapura	5.69	23.86	0
1988-01-28	Durgapura	9.1	25.02	0
1988-01-29	Durgapura	9.1	25.3	0
1988-01-30	Durgapura	8.77	26	0
1988-01-31	Durgapura	9.47	26.3	0
1988-02-01	Durgapura	9.78	26.28	0
1988-02-02	Durgapura	8.5	25.97	0
1988-02-03	Durgapura	7.83	26.05	0
1988-02-04	Durgapura	7.6	27.55	0
1988-02-05	Durgapura	8.06	28.49	0
1988-02-06	Durgapura	9.45	29.55	0
1988-02-07	Durgapura	10.79	30.44	0
1988-02-08	Durgapura	11.63	29.6	0
1988-02-09	Durgapura	11.78	29.64	0
1988-02-10	Durgapura	11.26	28.46	0
1988-02-11	Durgapura	12.21	28.63	0
1988-02-12	Durgapura	13.05	28.99	0
1988-02-13	Durgapura	13.19	27.2	0
1988-02-14	Durgapura	13.37	28.41	0
1988-02-15	Durgapura	10.67	26.27	0
1988-02-16	Durgapura	12.57	25.24	0
1988-02-17	Durgapura	10.55	25.83	0
1988-02-18	Durgapura	11.07	27.02	0
1988-02-19	Durgapura	11.62	27.41	0
1988-02-20	Durgapura	12.92	28.25	0
1988-02-21	Durgapura	14.46	30.47	0
1988-02-22	Durgapura	14.57	30.42	0
1988-02-23	Durgapura	14.19	29.79	0
1988-02-24	Durgapura	10.22	28.31	0
1988-02-25	Durgapura	9.46	27.48	0
1988-02-26	Durgapura	10.83	29.13	0
1988-02-27	Durgapura	12.64	31.16	0
1988-02-28	Durgapura	15.24	30.32	0
1988-02-29	Durgapura	15.05	29.82	0
1988-03-01	Durgapura	13.64	28.32	0
1988-03-02	Durgapura	12.04	27.4	0
1988-03-03	Durgapura	11.52	28.8	0
1988-03-04	Durgapura	12.59	30.4	0
1988-03-05	Durgapura	14.03	31.62	0
1988-03-06	Durgapura	15.07	32.41	0
1988-03-07	Durgapura	15.83	32.77	0
1988-03-08	Durgapura	19.14	33.37	0
1988-03-09	Durgapura	15.48	30.48	0
1988-03-10	Durgapura	16.44	30.15	0
1988-03-11	Durgapura	18.51	32.6	0
1988-03-12	Durgapura	18.63	32.5	0
1988-03-13	Durgapura	17.86	31.52	0
1988-03-14	Durgapura	15.49	31.28	0
1988-03-15	Durgapura	16.15	31.53	0
1988-03-16	Durgapura	18	33.97	0
1988-03-17	Durgapura	18.23	34.65	0
1988-03-18	Durgapura	16.74	32.96	0
1988-03-19	Durgapura	15.66	31.92	0
1988-03-20	Durgapura	13.27	30.36	0
1988-03-21	Durgapura	12.72	30.32	0
1988-03-22	Durgapura	13.58	32.83	0
1988-03-23	Durgapura	15.07	33.72	0
1988-03-24	Durgapura	17.76	35.39	0
1988-03-25	Durgapura	18.23	35.64	0
1988-03-26	Durgapura	19.84	35.45	0
1988-03-27	Durgapura	17.3	33.23	0
1988-03-28	Durgapura	13.93	30.63	0
1988-03-29	Durgapura	15.37	31.99	0
1988-03-30	Durgapura	15.98	35.03	0
1988-03-31	Durgapura	17.81	35.65	0
1988-04-01	Durgapura	17.09	35.65	0
1988-04-02	Durgapura	17.93	36.13	0
1988-04-03	Durgapura	20.15	38.01	0
1988-04-04	Durgapura	20.41	38.52	0
1988-04-05	Durgapura	20.26	37.94	0
1988-04-06	Durgapura	19.15	36.84	0
1988-04-07	Durgapura	18.71	36.22	0
1988-04-08	Durgapura	20.02	37.28	0
1988-04-09	Durgapura	19.49	38.88	0
1988-04-10	Durgapura	19.95	39.8	0
1988-04-11	Durgapura	20.49	40.34	0
1988-04-12	Durgapura	21.92	40.98	0
1988-04-13	Durgapura	22.87	41.61	0
1988-04-14	Durgapura	23.25	41.57	0
1988-04-15	Durgapura	23.52	41.61	0
1988-04-16	Durgapura	24.49	42.39	0
1988-04-17	Durgapura	26.04	42.58	0
1988-04-18	Durgapura	26.31	42.17	0
1988-04-19	Durgapura	25.08	40.82	0
1988-04-20	Durgapura	23.05	38.04	0.1
1988-04-21	Durgapura	23.1	37.6	0
1988-04-22	Durgapura	23.16	38.61	0
1988-04-23	Durgapura	22.88	39.11	0
1988-04-24	Durgapura	24.48	39.48	0
1988-04-25	Durgapura	23	38.61	0
1988-04-26	Durgapura	24.96	39.94	0
1988-04-27	Durgapura	26.06	41.42	0
1988-04-28	Durgapura	26.66	41.24	0
1988-04-29	Durgapura	27.65	41.64	0.2
1988-04-30	Durgapura	27.21	40.71	0
1988-05-01	Durgapura	26.22	39.87	0
1988-05-02	Durgapura	26.39	40.01	0
1988-05-03	Durgapura	25	40.22	0
1988-05-04	Durgapura	24.21	40.59	0
1988-05-05	Durgapura	25.05	41.37	0
1988-05-06	Durgapura	26.75	43.11	0
1988-05-07	Durgapura	27.3	43.31	0
1988-05-08	Durgapura	27.03	44.22	0
1988-05-09	Durgapura	27.8	44.62	0
1988-05-10	Durgapura	26.58	44.26	0
1988-05-11	Durgapura	28.26	44.53	0
1988-05-12	Durgapura	27.84	44.39	0
1988-05-13	Durgapura	27.95	44.74	0
1988-05-14	Durgapura	28.34	44.48	0
1988-05-15	Durgapura	29.19	44.23	0
1988-05-16	Durgapura	28.54	43.23	0
1988-05-17	Durgapura	28.74	43.79	0
1988-05-18	Durgapura	27.82	44.1	0
1988-05-19	Durgapura	27.57	41.9	0
1988-05-20	Durgapura	27.23	41.99	2.5
1988-05-21	Durgapura	28.37	42.84	0
1988-05-22	Durgapura	29.64	43.53	0
1988-05-23	Durgapura	29	43.69	0
1988-05-24	Durgapura	29.1	43.26	0
1988-05-25	Durgapura	29.86	43.73	0
1988-05-26	Durgapura	29.34	44.49	0
1988-05-27	Durgapura	29.5	44.68	0
1988-05-28	Durgapura	30.31	45.41	0
1988-05-29	Durgapura	30.43	45.25	0
1988-05-30	Durgapura	30.32	45.12	0
1988-05-31	Durgapura	30.64	44.73	0
1988-06-01	Durgapura	29.58	44	0
1988-06-02	Durgapura	28.72	43.49	0
1988-06-03	Durgapura	29.5	44.05	0
1988-06-04	Durgapura	29.72	44.23	0
1988-06-05	Durgapura	27.42	43.09	0
1988-06-06	Durgapura	23.14	39.83	9.6
1988-06-07	Durgapura	25.24	37.92	0
1988-06-08	Durgapura	26.08	40.17	0
1988-06-09	Durgapura	28.63	42.99	0
1988-06-10	Durgapura	29.61	43.43	0
1988-06-11	Durgapura	28.2	44.05	0
1988-06-12	Durgapura	28.74	44.54	0
1988-06-13	Durgapura	29	44.93	0
1988-06-14	Durgapura	29.32	43.57	0
1988-06-15	Durgapura	29.92	40.67	0
1988-06-16	Durgapura	26.32	41.19	0
1988-06-17	Durgapura	25.38	40.3	0
1988-06-18	Durgapura	25.47	39.92	0
1988-06-19	Durgapura	26.9	37.75	0
1988-06-20	Durgapura	27.08	37.99	0
1988-06-21	Durgapura	26.75	38.57	0
1988-06-22	Durgapura	27.08	38.09	0
1988-06-23	Durgapura	26.16	38.36	9.4
1988-06-24	Durgapura	26.86	37.23	0
1988-06-25	Durgapura	27.02	36.93	0
1988-06-26	Durgapura	27.59	38.47	0
1988-06-27	Durgapura	26.61	37.6	3.1
1988-06-28	Durgapura	27.86	38.03	5
1988-06-29	Durgapura	24.6	35.94	0.9
1988-06-30	Durgapura	22.94	33.91	25.9
1988-07-01	Durgapura	24.45	31.42	16.3
1988-07-02	Durgapura	25.31	31.89	0
1988-07-03	Durgapura	25.94	34.05	5
1988-07-04	Durgapura	26.01	34.1	0.1
1988-07-05	Durgapura	26.2	35.8	0
1988-07-06	Durgapura	26.48	35.17	0
1988-07-07	Durgapura	25.69	34.55	0
1988-07-08	Durgapura	25.81	34.25	0
1988-07-09	Durgapura	26.36	36.74	0.3
1988-07-10	Durgapura	26.73	36.58	4.2
1988-07-11	Durgapura	25.77	36.17	4.1
1988-07-12	Durgapura	25.47	33.11	2.5
1988-07-13	Durgapura	24.2	33.04	26.6
1988-07-14	Durgapura	24.24	31.08	12.2
1988-07-15	Durgapura	24.62	31.38	1.7
1988-07-16	Durgapura	25.14	32.65	0.2
1988-07-17	Durgapura	25.97	33.16	0
1988-07-18	Durgapura	25.52	34.1	0
1988-07-19	Durgapura	25.54	32.99	11.3
1988-07-20	Durgapura	25.17	32.43	2.2
1988-07-21	Durgapura	26.35	33.35	8.2
1988-07-22	Durgapura	25.17	32.72	6.2
1988-07-23	Durgapura	25.37	32.53	2.8
1988-07-24	Durgapura	25.54	33.56	0.3
1988-07-25	Durgapura	24.63	32.05	0.9
1988-07-26	Durgapura	24.76	32.08	0.3
1988-07-27	Durgapura	23.93	32.45	7.5
1988-07-28	Durgapura	24.41	31.38	40.3
1988-07-29	Durgapura	24.85	31.66	2.9
1988-07-30	Durgapura	25.83	33.09	0.8
1988-07-31	Durgapura	24.94	32.9	2.5
1988-08-01	Durgapura	24.42	30.72	3.3
1988-08-02	Durgapura	24.56	30.69	0.2
1988-08-03	Durgapura	24.13	31.05	0.6
1988-08-04	Durgapura	24.68	32.23	4.1
1988-08-05	Durgapura	24.26	31.75	9.9
1988-08-06	Durgapura	23.89	30.6	2.1
1988-08-07	Durgapura	24.24	31.14	0
1988-08-08	Durgapura	24.43	30.91	0
1988-08-09	Durgapura	23.93	30.95	0
1988-08-10	Durgapura	24.32	31.23	0
1988-08-11	Durgapura	23.98	31.86	0
1988-08-12	Durgapura	23.77	31.05	1
1988-08-13	Durgapura	23.99	30.6	51.3
1988-08-14	Durgapura	24.34	31.02	0.8
1988-08-15	Durgapura	24.3	32.04	0
1988-08-16	Durgapura	24.48	32.26	0
1988-08-17	Durgapura	24.21	33.18	0
1988-08-18	Durgapura	25.47	33.93	0
1988-08-19	Durgapura	25.22	33.87	0
1988-08-20	Durgapura	24.7	31.83	68.4
1988-08-21	Durgapura	25.02	32.54	1.9
1988-08-22	Durgapura	24.9	34.01	0.3
1988-08-23	Durgapura	24.82	33.34	0.7
1988-08-24	Durgapura	24.23	33.07	1.3
1988-08-25	Durgapura	23.86	32.84	2.5
1988-08-26	Durgapura	24.07	33	38.5
1988-08-27	Durgapura	23.88	32.72	10
1988-08-28	Durgapura	24.58	33.65	0
1988-08-29	Durgapura	24.56	34.4	0
1988-08-30	Durgapura	24.44	34.62	0
1988-08-31	Durgapura	24.49	35.36	0
1988-09-01	Durgapura	24.32	35.39	0
1988-09-02	Durgapura	24.61	35.51	5.3
1988-09-03	Durgapura	24.82	36.63	0
1988-09-04	Durgapura	25.93	37.07	0
1988-09-05	Durgapura	26.2	37.28	0
1988-09-06	Durgapura	26.02	37.31	0
1988-09-07	Durgapura	25.89	36.36	0
1988-09-08	Durgapura	25.22	36.09	0
1988-09-09	Durgapura	24.75	35.68	0
1988-09-10	Durgapura	24.31	34.95	0
1988-09-11	Durgapura	23.9	35.77	0
1988-09-12	Durgapura	24.43	36.68	0
1988-09-13	Durgapura	24.92	38	0
1988-09-14	Durgapura	26.15	38.55	0
1988-09-15	Durgapura	25.06	38.49	0
1988-09-16	Durgapura	24.84	38.32	0
1988-09-17	Durgapura	23.48	35.46	0
1988-09-18	Durgapura	23.16	34.06	0
1988-09-19	Durgapura	23.24	32.85	0
1988-09-20	Durgapura	23.66	32.23	0.8
1988-09-21	Durgapura	24.5	32.87	0
1988-09-22	Durgapura	23	31.91	0
1988-09-23	Durgapura	22.7	30.13	66.2
1988-09-24	Durgapura	23.37	30.7	0.4
1988-09-25	Durgapura	24.23	31.79	1.2
1988-09-26	Durgapura	24.43	32.45	0
1988-09-27	Durgapura	23.97	33.45	0
1988-09-28	Durgapura	22.86	33.46	0
1988-09-29	Durgapura	23.16	34.44	0
1988-09-30	Durgapura	23.13	34.91	4
1988-10-01	Durgapura	22.76	34.71	0
1988-10-02	Durgapura	22.46	34.84	0
1988-10-03	Durgapura	22.76	34.27	0
1988-10-04	Durgapura	22.64	32.8	0
1988-10-05	Durgapura	21.98	33.7	0
1988-10-06	Durgapura	18.27	33.63	0
1988-10-07	Durgapura	18.49	33.31	0
1988-10-08	Durgapura	19.12	32.59	0
1988-10-09	Durgapura	19.66	32.75	0
1988-10-10	Durgapura	19.64	33.19	0
1988-10-11	Durgapura	17.84	33.34	0
1988-10-12	Durgapura	17.82	33.34	0
1988-10-13	Durgapura	18.83	34.35	0
1988-10-14	Durgapura	20.24	34.98	0
1988-10-15	Durgapura	18.98	35.16	0
1988-10-16	Durgapura	19.15	35.17	0
1988-10-17	Durgapura	18.61	34.96	0
1988-10-18	Durgapura	19.56	35.3	0
1988-10-19	Durgapura	20.01	35.46	0
1988-10-20	Durgapura	19.36	35.48	0
1988-10-21	Durgapura	19.05	34.53	0
1988-10-22	Durgapura	17.19	33.94	0
1988-10-23	Durgapura	16.76	34.58	0
1988-10-24	Durgapura	17.07	34.96	0
1988-10-25	Durgapura	18.07	35.2	0
1988-10-26	Durgapura	17.35	34.88	0
1988-10-27	Durgapura	17.19	34.41	0
1988-10-28	Durgapura	16.64	33.9	0
1988-10-29	Durgapura	16.79	33.44	0
1988-10-30	Durgapura	16.25	32.93	0
1988-10-31	Durgapura	15.23	32.98	0
1988-11-01	Durgapura	15.65	32.61	0
1988-11-02	Durgapura	15.2	32.48	0
1988-11-03	Durgapura	15.33	32.45	0
1988-11-04	Durgapura	14.63	32.65	0
1988-11-05	Durgapura	14.87	32.4	0
1988-11-06	Durgapura	14.36	32.1	0
1988-11-07	Durgapura	13.29	32.41	0
1988-11-08	Durgapura	13.14	32.8	0
1988-11-09	Durgapura	13.95	32.93	0
1988-11-10	Durgapura	13.41	32.65	0
1988-11-11	Durgapura	12.87	32.74	0
1988-11-12	Durgapura	13.91	32.26	0
1988-11-13	Durgapura	12.97	31.14	0
1988-11-14	Durgapura	12.46	30.83	0
1988-11-15	Durgapura	12.08	31.33	0
1988-11-16	Durgapura	12.62	31.81	0
1988-11-17	Durgapura	12.37	31.31	0
1988-11-18	Durgapura	12.68	31.68	0
1988-11-19	Durgapura	12.01	30.12	0
1988-11-20	Durgapura	12.26	29.54	0
1988-11-21	Durgapura	12.3	28.97	0
1988-11-22	Durgapura	11.99	28.47	0
1988-11-23	Durgapura	13.23	28.25	0
1988-11-24	Durgapura	13.3	27.83	0
1988-11-25	Durgapura	12.67	28.23	0
1988-11-26	Durgapura	10.54	27.3	0
1988-11-27	Durgapura	9.99	26.26	0
1988-11-28	Durgapura	9.15	25.04	0
1988-11-29	Durgapura	8.05	25.14	0
1988-11-30	Durgapura	7.89	25.24	0
1988-12-01	Durgapura	7.93	26.01	0
1988-12-02	Durgapura	8.08	26.57	0
1988-12-03	Durgapura	7.79	26.7	0
1988-12-04	Durgapura	7.68	26.64	0
1988-12-05	Durgapura	6.86	26.52	0
1988-12-06	Durgapura	7.8	26.91	0
1988-12-07	Durgapura	7.1	26.51	0
1988-12-08	Durgapura	7.71	26.88	0
1988-12-09	Durgapura	8.43	27.1	0
1988-12-10	Durgapura	8.38	26.61	0
1988-12-11	Durgapura	8.83	26.36	0
1988-12-12	Durgapura	9.94	25.43	0
1988-12-13	Durgapura	8.85	27.58	0
1988-12-14	Durgapura	8.81	27.84	0
1988-12-15	Durgapura	10.21	29.12	0
1988-12-16	Durgapura	10.44	28.91	0
1988-12-17	Durgapura	11.04	28.59	0
1988-12-18	Durgapura	11.44	27.69	0
1988-12-19	Durgapura	11.81	27.51	0
1988-12-20	Durgapura	12.91	27.15	0
1988-12-21	Durgapura	11.18	26.99	0
1988-12-22	Durgapura	9.96	24.7	0
1988-12-23	Durgapura	11.16	25.13	0
1988-12-24	Durgapura	11.67	25.53	0
1988-12-25	Durgapura	11.88	24.14	0
1988-12-26	Durgapura	7.14	21.11	0
1988-12-27	Durgapura	6.62	21.37	0
1988-12-28	Durgapura	7.21	21.87	0
1988-12-29	Durgapura	6.52	22.69	0
1988-12-30	Durgapura	6.65	24.71	0
1988-12-31	Durgapura	7.12	26.41	0
1989-01-01	Durgapura	9.13	25.11	0
1989-01-02	Durgapura	11.05	24.54	0
1989-01-03	Durgapura	8.81	24.39	0
1989-01-04	Durgapura	6.38	21.53	0
1989-01-05	Durgapura	8.13	22.55	0
1989-01-06	Durgapura	10	24.37	0
1989-01-07	Durgapura	10.89	24.39	8.2
1989-01-08	Durgapura	10.17	19.98	13.4
1989-01-09	Durgapura	4.69	18.23	0
1989-01-10	Durgapura	4.74	18.31	0
1989-01-11	Durgapura	4.23	18.46	0
1989-01-12	Durgapura	3.66	19	0
1989-01-13	Durgapura	4.6	20.61	0
1989-01-14	Durgapura	5.59	20.54	0
1989-01-15	Durgapura	5.09	20.57	0
1989-01-16	Durgapura	5.54	20.89	0
1989-01-17	Durgapura	5.73	22.6	0
1989-01-18	Durgapura	5.2	21.83	0
1989-01-19	Durgapura	6.01	21.98	0
1989-01-20	Durgapura	7.31	22.59	0
1989-01-21	Durgapura	6.55	21.95	0
1989-01-22	Durgapura	4.45	22.21	0
1989-01-23	Durgapura	4.18	22.32	0
1989-01-24	Durgapura	3.98	23.3	0
1989-01-25	Durgapura	5.19	24.41	0
1989-01-26	Durgapura	6.33	25.75	0
1989-01-27	Durgapura	6.45	25.94	0
1989-01-28	Durgapura	7.13	25.66	0
1989-01-29	Durgapura	6.04	25.45	0
1989-01-30	Durgapura	6.47	26.22	0
1989-01-31	Durgapura	8.03	26.8	0
1989-02-01	Durgapura	9.6	28.07	0
1989-02-02	Durgapura	8.79	26.93	0
1989-02-03	Durgapura	8.15	26.17	0
1989-02-04	Durgapura	9.77	28.49	0
1989-02-05	Durgapura	12.32	28.5	0
1989-02-06	Durgapura	10.09	27.21	0
1989-02-07	Durgapura	8.9	25.08	0
1989-02-08	Durgapura	7.58	23.84	0
1989-02-09	Durgapura	6.76	23.33	0
1989-02-10	Durgapura	6.3	22.92	0
1989-02-11	Durgapura	6.25	22.91	0
1989-02-12	Durgapura	5.94	23.34	0
1989-02-13	Durgapura	9.69	24.51	0
1989-02-14	Durgapura	10.98	26.18	0
1989-02-15	Durgapura	10.21	26.47	0
1989-02-16	Durgapura	10.76	26.17	0
1989-02-17	Durgapura	8.72	26.41	0
1989-02-18	Durgapura	8.3	24.85	0
1989-02-19	Durgapura	6.77	23.45	0
1989-02-20	Durgapura	7.07	23.25	0
1989-02-21	Durgapura	8.84	25.61	0
1989-02-22	Durgapura	8.51	26.22	0
1989-02-23	Durgapura	8.79	26.25	0
1989-02-24	Durgapura	10.48	27.42	0
1989-02-25	Durgapura	12.23	30.43	0
1989-02-26	Durgapura	12.61	32.46	0
1989-02-27	Durgapura	13.93	33.04	0
1989-02-28	Durgapura	12.39	31.81	0
1989-03-01	Durgapura	11.92	30.37	0
1989-03-02	Durgapura	10.65	29.47	0
1989-03-03	Durgapura	10.46	28.83	0
1989-03-04	Durgapura	11.24	28.69	0
1989-03-05	Durgapura	11.17	29.75	0
1989-03-06	Durgapura	12.43	31.76	0.7
1989-03-07	Durgapura	13.09	31.95	0
1989-03-08	Durgapura	13.84	31.84	0
1989-03-09	Durgapura	13.66	32.02	0
1989-03-10	Durgapura	15.19	32.4	0
1989-03-11	Durgapura	14.73	32.93	0
1989-03-12	Durgapura	14.81	31.11	0
1989-03-13	Durgapura	14.74	31.91	0
1989-03-14	Durgapura	15.87	33.03	0
1989-03-15	Durgapura	16.08	31.42	0
1989-03-16	Durgapura	14.94	30.82	0
1989-03-17	Durgapura	15.01	31.4	0
1989-03-18	Durgapura	17.11	33.69	0
1989-03-19	Durgapura	17.72	34.22	0
1989-03-20	Durgapura	18.03	34.74	0
1989-03-21	Durgapura	18.2	35.02	0
1989-03-22	Durgapura	19.22	35.11	0
1989-03-23	Durgapura	17.21	33.63	0
1989-03-24	Durgapura	16.43	32.67	0
1989-03-25	Durgapura	17.16	32.16	0
1989-03-26	Durgapura	17.22	31.7	0
1989-03-27	Durgapura	15.89	29.32	0
1989-03-28	Durgapura	14.72	28.81	0
1989-03-29	Durgapura	13.54	29.61	0
1989-03-30	Durgapura	15.71	30.15	0
1989-03-31	Durgapura	18.32	32.18	0
1989-04-01	Durgapura	19.3	34.94	0
1989-04-02	Durgapura	15.71	32.87	0
1989-04-03	Durgapura	13.63	31.59	0
1989-04-04	Durgapura	14.4	32.24	0
1989-04-05	Durgapura	15.46	32.11	0
1989-04-06	Durgapura	14.7	31.83	0
1989-04-07	Durgapura	16.14	33.97	0
1989-04-08	Durgapura	17.52	36.13	0
1989-04-09	Durgapura	19.78	37.64	0
1989-04-10	Durgapura	19.95	37.05	0
1989-04-11	Durgapura	17.26	34.52	0
1989-04-12	Durgapura	17.42	35.51	0
1989-04-13	Durgapura	17.95	36.78	0
1989-04-14	Durgapura	19.42	36.9	0
1989-04-15	Durgapura	20.35	38.37	0
1989-04-16	Durgapura	21.21	39.24	0
1989-04-17	Durgapura	21.3	38.55	0
1989-04-18	Durgapura	21.58	38.97	0
1989-04-19	Durgapura	20.6	39.29	0
1989-04-20	Durgapura	21.6	39.73	0
1989-04-21	Durgapura	20.46	39.62	0
1989-04-22	Durgapura	22.26	40.28	0
1989-04-23	Durgapura	23.37	39.54	0
1989-04-24	Durgapura	23.45	38.61	0
1989-04-25	Durgapura	23.1	37.98	0
1989-04-26	Durgapura	22.99	37.98	0
1989-04-27	Durgapura	23.22	38.42	0
1989-04-28	Durgapura	23.8	38.65	0
1989-04-29	Durgapura	22.79	39.15	0
1989-04-30	Durgapura	23.77	39.82	0
1989-05-01	Durgapura	25.92	40.77	0
1989-05-02	Durgapura	25.42	39.41	0
1989-05-03	Durgapura	24.3	38.49	0
1989-05-04	Durgapura	24	38.45	0
1989-05-05	Durgapura	22.88	38.99	0
1989-05-06	Durgapura	20.82	38.57	0
1989-05-07	Durgapura	20.87	38.89	0
1989-05-08	Durgapura	20.33	38.69	0
1989-05-09	Durgapura	20.76	39.65	0
1989-05-10	Durgapura	25.23	41.14	0
1989-05-11	Durgapura	26.52	42.99	0
1989-05-12	Durgapura	26.68	43.03	0
1989-05-13	Durgapura	25.92	43.16	0
1989-05-14	Durgapura	26.22	43.02	0
1989-05-15	Durgapura	26.19	43.76	0
1989-05-16	Durgapura	27.71	44.81	0
1989-05-17	Durgapura	29.2	44.91	0
1989-05-18	Durgapura	29.08	43.66	0
1989-05-19	Durgapura	29.62	44.59	0
1989-05-20	Durgapura	27.27	44.52	0
1989-05-21	Durgapura	26.94	44.44	0
1989-05-22	Durgapura	27.74	45	0
1989-05-23	Durgapura	27.84	44.56	0
1989-05-24	Durgapura	27.69	43.32	0
1989-05-25	Durgapura	27.08	42.58	0
1989-05-26	Durgapura	26.18	41.62	0
1989-05-27	Durgapura	24.93	42.01	0
1989-05-28	Durgapura	26.93	42.43	0
1989-05-29	Durgapura	27.97	42.45	0
1989-05-30	Durgapura	27.59	41.5	0
1989-05-31	Durgapura	28.54	41.49	0
1989-06-01	Durgapura	26.52	40.5	0
1989-06-02	Durgapura	28	41.55	0
1989-06-03	Durgapura	29.74	42.54	0
1989-06-04	Durgapura	28.86	42.69	0
1989-06-05	Durgapura	27.89	41.9	0
1989-06-06	Durgapura	29.3	40.79	0
1989-06-07	Durgapura	26.29	40.61	0
1989-06-08	Durgapura	27.24	40.79	0.5
1989-06-09	Durgapura	28.33	42.04	0.2
1989-06-10	Durgapura	26.55	40.81	0.8
1989-06-11	Durgapura	26.44	37.46	0
1989-06-12	Durgapura	26.69	38.73	0
1989-06-13	Durgapura	27.4	40.96	0
1989-06-14	Durgapura	28.03	40.95	0
1989-06-15	Durgapura	26.78	38.39	0
1989-06-16	Durgapura	26.64	37.64	0
1989-06-17	Durgapura	23.93	35.54	16.8
1989-06-18	Durgapura	24.88	36.63	0
1989-06-19	Durgapura	24.77	37.19	0
1989-06-20	Durgapura	25.49	37.05	16
1989-06-21	Durgapura	25.47	36.9	0.2
[truncated: 8,959 more rows]

## Sheet: Faizabad
Day	Center	Min. Temperature	Max. Temperature	Rainfall
1984-01-01	Faziabad	6.89	21.79	0
1984-01-02	Faziabad	10.14	21.95	0
1984-01-03	Faziabad	8.58	20.04	0
1984-01-04	Faziabad	7.63	22.06	0
1984-01-05	Faziabad	8.25	22.64	0
1984-01-06	Faziabad	10.52	22.75	0
1984-01-07	Faziabad	9.53	23.69	0
1984-01-08	Faziabad	10.05	23.89	0
1984-01-09	Faziabad	9.37	23.27	0
1984-01-10	Faziabad	9.59	23.75	0
1984-01-11	Faziabad	10.41	24.47	0
1984-01-12	Faziabad	9.64	24.86	0
1984-01-13	Faziabad	10.45	24.61	0
1984-01-14	Faziabad	12.16	24.86	0
1984-01-15	Faziabad	11.47	24.46	0
1984-01-16	Faziabad	12.71	20.48	0.4
1984-01-17	Faziabad	9.7	18.89	22.8
1984-01-18	Faziabad	7.4	19.63	0
1984-01-19	Faziabad	7.03	21.4	0
1984-01-20	Faziabad	7.59	21.76	0
1984-01-21	Faziabad	7.84	22.56	0
1984-01-22	Faziabad	8.45	22.93	0
1984-01-23	Faziabad	8.64	22.63	0
1984-01-24	Faziabad	7.59	22.84	0
1984-01-25	Faziabad	7.11	22.68	0
1984-01-26	Faziabad	9.03	22.85	0
1984-01-27	Faziabad	7.17	23.3	0
1984-01-28	Faziabad	6.19	22.47	0
1984-01-29	Faziabad	5.75	22.44	0
1984-01-30	Faziabad	5.67	22.82	0
1984-01-31	Faziabad	5.21	23.41	0
1984-02-01	Faziabad	8.5	24.51	0
1984-02-02	Faziabad	10.37	25.54	0
1984-02-03	Faziabad	13.67	25.54	0
1984-02-04	Faziabad	13.64	23.85	0.4
1984-02-05	Faziabad	9.3	24.1	0
1984-02-06	Faziabad	7.38	22.46	0
1984-02-07	Faziabad	6.69	22.59	0
1984-02-08	Faziabad	9.41	20.93	0.8
1984-02-09	Faziabad	9.31	23.63	0
1984-02-10	Faziabad	8.3	23.38	0
1984-02-11	Faziabad	11.14	23.58	0.3
1984-02-12	Faziabad	12.1	21.05	3.4
1984-02-13	Faziabad	9.65	23.41	0
1984-02-14	Faziabad	8.01	24.8	0
1984-02-15	Faziabad	7.87	24.42	0
1984-02-16	Faziabad	8.55	25.54	0
1984-02-17	Faziabad	11.06	26.34	0
1984-02-18	Faziabad	13.24	25.07	0.1
1984-02-19	Faziabad	15.25	24.74	1
1984-02-20	Faziabad	15.44	22.62	14.4
1984-02-21	Faziabad	14.74	24.24	0
1984-02-22	Faziabad	9.66	23.62	0
1984-02-23	Faziabad	6.4	21	0
1984-02-24	Faziabad	6.25	20.91	0
1984-02-25	Faziabad	5.65	21.64	0
1984-02-26	Faziabad	6.5	21.93	0
1984-02-27	Faziabad	7.83	24.33	0
1984-02-28	Faziabad	8.72	25.78	0
1984-02-29	Faziabad	10.18	26.19	0
1984-03-01	Faziabad	10.03	27.48	0
1984-03-02	Faziabad	11.67	27.2	0
1984-03-03	Faziabad	10.61	28.22	0
1984-03-04	Faziabad	10.77	28.6	0
1984-03-05	Faziabad	12.02	29.51	0
1984-03-06	Faziabad	12.12	30.03	0
1984-03-07	Faziabad	12.25	31.07	0
1984-03-08	Faziabad	13.37	31.67	0
1984-03-09	Faziabad	14.07	31.91	0
1984-03-10	Faziabad	13.68	31.6	0
1984-03-11	Faziabad	13.49	32.25	0
1984-03-12	Faziabad	14.69	33.34	0
1984-03-13	Faziabad	16.11	34.39	0
1984-03-14	Faziabad	16.24	34.86	0
1984-03-15	Faziabad	16.24	35.1	0
1984-03-16	Faziabad	15.99	35.18	0
1984-03-17	Faziabad	17.28	35.85	0
1984-03-18	Faziabad	18.01	35.69	0
1984-03-19	Faziabad	18.23	35.07	0
1984-03-20	Faziabad	13.77	32.95	0
1984-03-21	Faziabad	14	30.89	0
1984-03-22	Faziabad	14.34	32	0
1984-03-23	Faziabad	15.77	33.63	0
1984-03-24	Faziabad	17.3	35.15	0
1984-03-25	Faziabad	18.79	36.91	0
1984-03-26	Faziabad	20.04	38.3	0
1984-03-27	Faziabad	17.5	37.38	6.6
1984-03-28	Faziabad	17.94	34.99	0
1984-03-29	Faziabad	18.7	35.75	0
1984-03-30	Faziabad	20.61	37.21	0
1984-03-31	Faziabad	20.51	38.97	0
1984-04-01	Faziabad	21.16	40.06	0
1984-04-02	Faziabad	21.67	40.31	0
1984-04-03	Faziabad	22	40.33	0
1984-04-04	Faziabad	21.24	38.99	0
1984-04-05	Faziabad	20.4	38.23	0
1984-04-06	Faziabad	18.7	38.02	0
1984-04-07	Faziabad	19.29	38.29	0
1984-04-08	Faziabad	19.27	38.57	0
1984-04-09	Faziabad	18.36	38.65	0
1984-04-10	Faziabad	21.53	37.38	0
1984-04-11	Faziabad	19.58	34.25	0
1984-04-12	Faziabad	17.8	35.5	0
1984-04-13	Faziabad	18.67	36.62	0
1984-04-14	Faziabad	20.57	37.66	0
1984-04-15	Faziabad	22.17	39.65	0
1984-04-16	Faziabad	22.46	41.72	0
1984-04-17	Faziabad	23.18	41.38	0
1984-04-18	Faziabad	23.29	41.64	0
1984-04-19	Faziabad	24.63	41.29	0
1984-04-20	Faziabad	22.71	41.95	0
1984-04-21	Faziabad	24.25	42.1	0
1984-04-22	Faziabad	23.93	40.53	0.2
1984-04-23	Faziabad	20.35	37.13	1
1984-04-24	Faziabad	20.63	35.26	0.4
1984-04-25	Faziabad	21.62	36.19	0
1984-04-26	Faziabad	23.07	37.86	0
1984-04-27	Faziabad	24.09	40.5	0.8
1984-04-28	Faziabad	24.36	40.67	0
1984-04-29	Faziabad	24.62	39.56	0
1984-04-30	Faziabad	25.28	39.47	0.1
1984-05-01	Faziabad	22.12	40.28	0
1984-05-02	Faziabad	22.81	40.68	0
1984-05-03	Faziabad	23.62	40.26	0
1984-05-04	Faziabad	24.17	41.12	0
1984-05-05	Faziabad	23.76	41.33	0
1984-05-06	Faziabad	24.4	40.67	0
1984-05-07	Faziabad	24.92	41.04	0
1984-05-08	Faziabad	24.72	38.8	0
1984-05-09	Faziabad	25.43	37.42	0
1984-05-10	Faziabad	23.57	36.79	0
1984-05-11	Faziabad	22.66	34.59	0
1984-05-12	Faziabad	24.65	36.15	0
1984-05-13	Faziabad	25.83	38.09	0
1984-05-14	Faziabad	26.18	39.38	0
1984-05-15	Faziabad	26.58	41.47	0
1984-05-16	Faziabad	26.23	42.39	0
1984-05-17	Faziabad	27.1	42.65	0
1984-05-18	Faziabad	25.21	43.9	0
1984-05-19	Faziabad	24.91	44.1	0
1984-05-20	Faziabad	24.55	43.94	0
1984-05-21	Faziabad	25.57	43.93	0
1984-05-22	Faziabad	25.89	43.86	0
1984-05-23	Faziabad	26.49	44.23	0
1984-05-24	Faziabad	26.62	43.21	0
1984-05-25	Faziabad	27.38	41.68	0
1984-05-26	Faziabad	26.99	38.35	0
1984-05-27	Faziabad	28.26	38.01	0
1984-05-28	Faziabad	28.16	38.01	0
1984-05-29	Faziabad	25.09	38.83	21.7
1984-05-30	Faziabad	25	36.86	0
1984-05-31	Faziabad	26.59	37.28	0
1984-06-01	Faziabad	29.22	39.8	0
1984-06-02	Faziabad	28.82	41.1	18.2
1984-06-03	Faziabad	28.43	40.96	8.7
1984-06-04	Faziabad	28.37	40.81	0
1984-06-05	Faziabad	25.99	37.81	33.4
1984-06-06	Faziabad	26.28	34.68	0.6
1984-06-07	Faziabad	25.9	36.64	1.9
1984-06-08	Faziabad	25.24	36.5	0.5
1984-06-09	Faziabad	24.85	34	153.5
1984-06-10	Faziabad	25.56	35.22	74.5
1984-06-11	Faziabad	26.09	34.07	7.2
1984-06-12	Faziabad	25.22	32.26	37.6
1984-06-13	Faziabad	24.69	32.65	49.1
1984-06-14	Faziabad	24.95	34.32	29.4
1984-06-15	Faziabad	26.4	34.88	0.2
1984-06-16	Faziabad	25.91	35.23	1.4
1984-06-17	Faziabad	25.04	34.91	6.1
1984-06-18	Faziabad	23.39	32.21	96.3
1984-06-19	Faziabad	23.78	29.7	84.4
1984-06-20	Faziabad	24.1	30.85	1.6
1984-06-21	Faziabad	26.33	33.44	0.1
1984-06-22	Faziabad	25.65	35.33	21
1984-06-23	Faziabad	27.15	35.62	0
1984-06-24	Faziabad	25.54	36.19	15.8
1984-06-25	Faziabad	26.35	36.6	27.5
1984-06-26	Faziabad	25.32	31.02	5.7
1984-06-27	Faziabad	26.31	33.05	0
1984-06-28	Faziabad	24.94	34.85	19.8
1984-06-29	Faziabad	26.18	33.63	0.3
1984-06-30	Faziabad	25.01	32.96	0
1984-07-01	Faziabad	26.08	34.02	0
1984-07-02	Faziabad	26.44	34.21	0
1984-07-03	Faziabad	26.85	35.1	0.4
1984-07-04	Faziabad	27.24	35.86	0
1984-07-05	Faziabad	26.58	35.25	0
1984-07-06	Faziabad	26.22	35.25	0
1984-07-07	Faziabad	25.89	33.54	4.7
1984-07-08	Faziabad	24.5	32.28	87.9
1984-07-09	Faziabad	23.73	29.23	73.3
1984-07-10	Faziabad	24.14	30.98	46.3
1984-07-11	Faziabad	25.05	33.57	39.4
1984-07-12	Faziabad	25.88	34.3	3.9
1984-07-13	Faziabad	24.61	33.66	7.2
1984-07-14	Faziabad	24.88	33.19	14.9
1984-07-15	Faziabad	25.9	34.5	6
1984-07-16	Faziabad	25.1	33.8	2.6
1984-07-17	Faziabad	25.23	31.74	19.3
1984-07-18	Faziabad	24.75	32.78	6.1
1984-07-19	Faziabad	25.13	32.09	3.2
1984-07-20	Faziabad	25.52	32.93	0
1984-07-21	Faziabad	25.15	33.62	0.5
1984-07-22	Faziabad	24.45	31.5	66.9
1984-07-23	Faziabad	24.16	30.05	3.6
1984-07-24	Faziabad	24.34	30.87	13.6
1984-07-25	Faziabad	24.63	30.48	12.6
1984-07-26	Faziabad	25.13	32.25	0.3
1984-07-27	Faziabad	25.72	31.38	24.6
1984-07-28	Faziabad	26.13	31.77	24.5
1984-07-29	Faziabad	25.87	33.18	14.8
1984-07-30	Faziabad	25.22	34.31	21.9
1984-07-31	Faziabad	25.59	33.34	0
1984-08-01	Faziabad	25.99	33.65	0
1984-08-02	Faziabad	25.63	32.84	0.4
1984-08-03	Faziabad	25.78	32.14	0.5
1984-08-04	Faziabad	25.39	33.61	1.9
1984-08-05	Faziabad	26.18	34.34	0
1984-08-06	Faziabad	26.53	34.8	0
1984-08-07	Faziabad	26.65	35.21	1.6
1984-08-08	Faziabad	23.86	35.19	2.6
1984-08-09	Faziabad	25.79	33.58	0.6
1984-08-10	Faziabad	25.87	33.48	0.6
1984-08-11	Faziabad	25.48	33.04	4.4
1984-08-12	Faziabad	24.62	33.63	0.8
1984-08-13	Faziabad	25.55	33.37	0
1984-08-14	Faziabad	26.07	34.65	0.2
1984-08-15	Faziabad	24.27	35.77	23.6
1984-08-16	Faziabad	26.53	35.06	0.5
1984-08-17	Faziabad	25.57	33.86	0
1984-08-18	Faziabad	25.33	32.47	0.1
1984-08-19	Faziabad	24.47	31.85	0
1984-08-20	Faziabad	24.9	32.28	0
1984-08-21	Faziabad	25.35	32.17	0.4
1984-08-22	Faziabad	25.76	33.23	0
1984-08-23	Faziabad	25.1	34.58	12.2
1984-08-24	Faziabad	25.06	33.07	38.1
1984-08-25	Faziabad	24.55	32.45	6.8
1984-08-26	Faziabad	24.53	30.52	15.2
1984-08-27	Faziabad	24.6	30.95	3.6
1984-08-28	Faziabad	25.03	32.16	4.5
1984-08-29	Faziabad	24.86	31.47	22.1
1984-08-30	Faziabad	24.74	30.43	34
1984-08-31	Faziabad	24.46	30.13	5.7
1984-09-01	Faziabad	24.53	30.88	23.6
1984-09-02	Faziabad	24.6	32.1	24.6
1984-09-03	Faziabad	24.05	32.09	5.2
1984-09-04	Faziabad	24.26	30.92	30.2
1984-09-05	Faziabad	24.06	30.27	8
1984-09-06	Faziabad	23.39	28.79	58.1
1984-09-07	Faziabad	22.81	28.49	28.9
1984-09-08	Faziabad	23.14	28.66	24.8
1984-09-09	Faziabad	23.65	29.55	4.4
1984-09-10	Faziabad	24.28	30.65	0.5
1984-09-11	Faziabad	23.79	30.73	12.3
1984-09-12	Faziabad	24.51	32.13	4.5
1984-09-13	Faziabad	24.06	32.5	0
1984-09-14	Faziabad	24.97	33.21	2
1984-09-15	Faziabad	24.99	33.38	0.2
1984-09-16	Faziabad	24	33.37	7.6
1984-09-17	Faziabad	24.56	32.02	1.7
1984-09-18	Faziabad	23.85	31.9	9
1984-09-19	Faziabad	22.83	30.32	25.5
1984-09-20	Faziabad	22.64	32.92	0
1984-09-21	Faziabad	23.56	33.5	0
1984-09-22	Faziabad	23.13	34.21	0
1984-09-23	Faziabad	23.08	34.3	0
1984-09-24	Faziabad	22.84	34.37	0.1
1984-09-25	Faziabad	22.35	34.21	0
1984-09-26	Faziabad	21.64	34.61	0
1984-09-27	Faziabad	21.21	33.97	0.9
1984-09-28	Faziabad	19.77	33.91	0
1984-09-29	Faziabad	20.21	34.15	0
1984-09-30	Faziabad	19.88	34.16	0.1
1984-10-01	Faziabad	20.28	34.04	0
1984-10-02	Faziabad	19.48	34.33	0
1984-10-03	Faziabad	21.49	34.11	0
1984-10-04	Faziabad	23.12	34.78	0
1984-10-05	Faziabad	23.15	34.7	0.7
1984-10-06	Faziabad	20.56	34.87	0
1984-10-07	Faziabad	19.05	34.51	0
1984-10-08	Faziabad	18.44	34.33	0
1984-10-09	Faziabad	19.86	34.09	0
1984-10-10	Faziabad	21.33	34.11	0
1984-10-11	Faziabad	21.24	32.9	0
1984-10-12	Faziabad	19.72	32.33	0
1984-10-13	Faziabad	19.32	33.98	0
1984-10-14	Faziabad	18.74	33.92	0.2
1984-10-15	Faziabad	20.93	32.7	16.7
1984-10-16	Faziabad	22.87	30.26	0.8
1984-10-17	Faziabad	23.31	31.52	0
1984-10-18	Faziabad	22.48	32.61	0
1984-10-19	Faziabad	20.59	32.8	0
1984-10-20	Faziabad	19.63	34.46	0
1984-10-21	Faziabad	18.75	33.81	0
1984-10-22	Faziabad	17.84	33.62	0
1984-10-23	Faziabad	17.42	34.04	0
1984-10-24	Faziabad	17.79	34.13	0
1984-10-25	Faziabad	18.6	33.96	0
1984-10-26	Faziabad	17.36	33.9	0
1984-10-27	Faziabad	16.71	32.89	0
1984-10-28	Faziabad	16.97	33.16	0
1984-10-29	Faziabad	17.45	33.37	0
1984-10-30	Faziabad	16.87	33.28	0
1984-10-31	Faziabad	13.74	32.38	0
1984-11-01	Faziabad	12.95	31.55	0
1984-11-02	Faziabad	12.49	31.26	0
1984-11-03	Faziabad	12.69	30.9	0
1984-11-04	Faziabad	13.58	30.63	0
1984-11-05	Faziabad	14.39	30.88	0
1984-11-06	Faziabad	13.81	31.03	0
1984-11-07	Faziabad	12.19	30.67	0
1984-11-08	Faziabad	12.64	30.13	0
1984-11-09	Faziabad	13.08	30.61	0
1984-11-10	Faziabad	13.5	30.74	0
1984-11-11	Faziabad	14	30.57	0
1984-11-12	Faziabad	11.31	29.87	0
1984-11-13	Faziabad	11.74	29.27	0
1984-11-14	Faziabad	11.78	29.46	0
1984-11-15	Faziabad	12.21	29.49	0
1984-11-16	Faziabad	12.66	29.77	0
1984-11-17	Faziabad	12.09	29.5	0
1984-11-18	Faziabad	11.99	29.37	0
1984-11-19	Faziabad	12.01	29.81	0
1984-11-20	Faziabad	11.56	29.56	0
1984-11-21	Faziabad	11.61	29.21	0
1984-11-22	Faziabad	12.69	28.85	0
1984-11-23	Faziabad	11.83	28.79	0
1984-11-24	Faziabad	11.83	28.68	0
1984-11-25	Faziabad	11.96	28.4	0
1984-11-26	Faziabad	9.95	27.43	0
1984-11-27	Faziabad	8.86	26.02	0
1984-11-28	Faziabad	9.02	26.27	0
1984-11-29	Faziabad	9.6	26.71	0
1984-11-30	Faziabad	11.2	27.02	0
1984-12-01	Faziabad	11.15	27.8	0
1984-12-02	Faziabad	10.7	28.25	0
1984-12-03	Faziabad	10.91	27.87	0
1984-12-04	Faziabad	10.83	27.13	0
1984-12-05	Faziabad	8.93	26.68	0
1984-12-06	Faziabad	9.36	26.85	0
1984-12-07	Faziabad	8.88	26.6	0
1984-12-08	Faziabad	9.44	26.85	0
1984-12-09	Faziabad	10.31	26.55	0
1984-12-10	Faziabad	11.55	26.99	0
1984-12-11	Faziabad	11.42	27.41	0
1984-12-12	Faziabad	11.28	25.81	0
1984-12-13	Faziabad	12.18	26.74	0
1984-12-14	Faziabad	11.65	26.92	3.7
1984-12-15	Faziabad	9.22	23.46	0
1984-12-16	Faziabad	8.39	24.32	0
1984-12-17	Faziabad	8.08	25	0
1984-12-18	Faziabad	8.17	24.63	0
1984-12-19	Faziabad	6.76	24.21	0
1984-12-20	Faziabad	5.19	23.11	0
1984-12-21	Faziabad	6.1	23.01	0
1984-12-22	Faziabad	6.37	23.01	0
1984-12-23	Faziabad	6.26	24.02	0
1984-12-24	Faziabad	7.23	25.86	0
1984-12-25	Faziabad	7.96	25.76	0
1984-12-26	Faziabad	7.7	25.88	0
1984-12-27	Faziabad	8	26.72	0
1984-12-28	Faziabad	8.71	26.39	0
1984-12-29	Faziabad	8.13	25.62	0
1984-12-30	Faziabad	7.87	24.38	0
1984-12-31	Faziabad	10.98	23.41	0
1985-01-01	Faziabad	13.39	21.14	1.8
1985-01-02	Faziabad	12.99	24.02	16.7
1985-01-03	Faziabad	12.62	22.73	0
1985-01-04	Faziabad	9.86	20.14	0
1985-01-05	Faziabad	12.25	21.07	0
1985-01-06	Faziabad	10.84	18.11	0
1985-01-07	Faziabad	8.61	21.37	0
1985-01-08	Faziabad	7.96	21.34	0
1985-01-09	Faziabad	8.25	21.84	0
1985-01-10	Faziabad	8.74	23.19	0
1985-01-11	Faziabad	9.97	23.45	0
1985-01-12	Faziabad	8.96	24.2	0
1985-01-13	Faziabad	9.16	24.38	0
1985-01-14	Faziabad	7.99	23.72	0
1985-01-15	Faziabad	6.77	23.4	0
1985-01-16	Faziabad	7.11	22.89	0
1985-01-17	Faziabad	7.25	23.1	0
1985-01-18	Faziabad	6.71	21.82	0
1985-01-19	Faziabad	9.45	23.22	0
1985-01-20	Faziabad	9.4	18.26	0
1985-01-21	Faziabad	11.04	23.32	0
1985-01-22	Faziabad	12.72	24.15	15.1
1985-01-23	Faziabad	9.97	23.15	0
1985-01-24	Faziabad	9.47	24.14	0
1985-01-25	Faziabad	8.06	23.37	0
1985-01-26	Faziabad	8.25	23.99	0
1985-01-27	Faziabad	11.02	24.34	0
1985-01-28	Faziabad	10.61	25.29	0
1985-01-29	Faziabad	9.86	25.52	0
1985-01-30	Faziabad	9.11	25.59	0
1985-01-31	Faziabad	8.93	25.9	0
1985-02-01	Faziabad	9.63	25.82	0
1985-02-02	Faziabad	9.18	26.22	0
1985-02-03	Faziabad	8.4	25.01	0
1985-02-04	Faziabad	9.48	24.85	0
1985-02-05	Faziabad	11.55	26.24	0
1985-02-06	Faziabad	11.09	26.84	0
1985-02-07	Faziabad	8.87	24.53	0
1985-02-08	Faziabad	7.13	24.79	0
1985-02-09	Faziabad	8.25	27.06	0
1985-02-10	Faziabad	9.28	28.21	0
1985-02-11	Faziabad	8.87	26.34	0
1985-02-12	Faziabad	8.23	25.44	0
1985-02-13	Faziabad	7.42	24.43	0
1985-02-14	Faziabad	7.85	25.89	0
1985-02-15	Faziabad	8.41	26.32	0
1985-02-16	Faziabad	9.3	26.55	0
1985-02-17	Faziabad	8.82	26.61	0
1985-02-18	Faziabad	8.39	27.6	0
1985-02-19	Faziabad	10.24	28.62	0
1985-02-20	Faziabad	11.26	31.43	0
1985-02-21	Faziabad	12.28	30.76	0
1985-02-22	Faziabad	10.78	26.66	0
1985-02-23	Faziabad	10.41	27.14	0
1985-02-24	Faziabad	10.69	28.14	0
1985-02-25	Faziabad	11.15	29.92	0
1985-02-26	Faziabad	12.21	30.58	0
1985-02-27	Faziabad	11.89	28.85	0
1985-02-28	Faziabad	11.72	29.94	0
1985-03-01	Faziabad	12.63	31.52	0
1985-03-02	Faziabad	13.99	32.13	0
1985-03-03	Faziabad	13.45	32.24	0
1985-03-04	Faziabad	13.72	32.76	0
1985-03-05	Faziabad	14.59	33.02	0
1985-03-06	Faziabad	16.04	33.4	0
1985-03-07	Faziabad	15.64	35.43	0
1985-03-08	Faziabad	15.65	36.09	0
1985-03-09	Faziabad	15.8	34.78	0
1985-03-10	Faziabad	16.14	35.91	0
1985-03-11	Faziabad	14.42	34.82	0
1985-03-12	Faziabad	15.79	34.46	0
1985-03-13	Faziabad	17.27	36.53	0
1985-03-14	Faziabad	14.94	35.57	0
1985-03-15	Faziabad	13.9	33.7	0
1985-03-16	Faziabad	13.79	34.04	0
1985-03-17	Faziabad	14.94	35.71	0
1985-03-18	Faziabad	15.79	37.83	0
1985-03-19	Faziabad	15.03	35.72	0
1985-03-20	Faziabad	16.12	32.3	0
1985-03-21	Faziabad	14.32	33.44	0
1985-03-22	Faziabad	14.45	33.83	0
1985-03-23	Faziabad	15.97	35.51	0
1985-03-24	Faziabad	19	36.53	0
1985-03-25	Faziabad	17.64	34.31	0
1985-03-26	Faziabad	16.97	35.45	0
1985-03-27	Faziabad	19.24	36.3	0
1985-03-28	Faziabad	20.09	38.17	0
1985-03-29	Faziabad	20.78	39.29	0
1985-03-30	Faziabad	23.12	38.27	0
1985-03-31	Faziabad	20.04	38.07	0
1985-04-01	Faziabad	22.21	37.47	0
1985-04-02	Faziabad	18.23	33.95	0
1985-04-03	Faziabad	20.54	35.58	0
1985-04-04	Faziabad	19.69	35.89	0
1985-04-05	Faziabad	19.04	33.95	0
1985-04-06	Faziabad	20.12	37.32	0
1985-04-07	Faziabad	20.51	38.21	0.1
1985-04-08	Faziabad	20.77	37.09	0
1985-04-09	Faziabad	21.64	38.83	0
1985-04-10	Faziabad	23.28	38.99	0
1985-04-11	Faziabad	19.95	35.59	0
1985-04-12	Faziabad	19.4	36.29	0
1985-04-13	Faziabad	21.45	39.46	0
1985-04-14	Faziabad	22.9	41.59	0
1985-04-15	Faziabad	21.22	38.65	0
1985-04-16	Faziabad	20.18	37.79	0
1985-04-17	Faziabad	20.56	38.18	0
1985-04-18	Faziabad	20.79	39.13	0
1985-04-19	Faziabad	21.92	40.32	0
1985-04-20	Faziabad	22.8	40.58	0
1985-04-21	Faziabad	24.21	41.09	0
1985-04-22	Faziabad	24.05	41.43	0
1985-04-23	Faziabad	23.26	41.92	0
1985-04-24	Faziabad	23.08	41.81	0
1985-04-25	Faziabad	23.1	42.36	0
1985-04-26	Faziabad	22.97	41.97	0
1985-04-27	Faziabad	23.35	42.17	0
1985-04-28	Faziabad	23.42	41.58	0
1985-04-29	Faziabad	24.37	39.51	0
1985-04-30	Faziabad	23.69	38.36	0
1985-05-01	Faziabad	25.06	38.84	0
1985-05-02	Faziabad	24.86	39.48	0.7
1985-05-03	Faziabad	20.56	40.1	12.5
1985-05-04	Faziabad	23.26	37.34	0
1985-05-05	Faziabad	22.68	39.93	0
1985-05-06	Faziabad	24.61	40.08	0
1985-05-07	Faziabad	23.79	39.59	0
1985-05-08	Faziabad	24.65	36.54	0
1985-05-09	Faziabad	25.43	37.3	0
1985-05-10	Faziabad	25.89	39.61	0
1985-05-11	Faziabad	22.43	38.58	0
1985-05-12	Faziabad	24.49	36.66	0
1985-05-13	Faziabad	25.46	38.51	0
1985-05-14	Faziabad	26.51	39.59	0
1985-05-15	Faziabad	22.65	40.85	0
1985-05-16	Faziabad	25.6	41.3	0
1985-05-17	Faziabad	26.77	41.25	0
1985-05-18	Faziabad	25.78	41.79	0
1985-05-19	Faziabad	25.92	41.95	0
1985-05-20	Faziabad	26.48	41.27	0
1985-05-21	Faziabad	23.59	40.77	0
1985-05-22	Faziabad	24.9	36.19	0
1985-05-23	Faziabad	25.48	37.7	0
1985-05-24	Faziabad	26.42	38.8	0
1985-05-25	Faziabad	26.34	38.15	0
1985-05-26	Faziabad	27.81	39.28	0
1985-05-27	Faziabad	28.74	41.81	0
1985-05-28	Faziabad	27.26	42.79	0
1985-05-29	Faziabad	26.6	43.17	0
1985-05-30	Faziabad	26.5	44.05	0
1985-05-31	Faziabad	30.78	44.11	0
1985-06-01	Faziabad	28.2	40.52	0
1985-06-02	Faziabad	28.18	41.4	0
1985-06-03	Faziabad	28.14	40.74	0
1985-06-04	Faziabad	27.02	41.19	0
1985-06-05	Faziabad	26.16	40.8	5.3
1985-06-06	Faziabad	25.19	39.21	11.3
1985-06-07	Faziabad	25.44	36.6	0
1985-06-08	Faziabad	26.76	36.69	0
1985-06-09	Faziabad	25.88	38.47	0
1985-06-10	Faziabad	25.44	37.96	1.1
1985-06-11	Faziabad	24.95	37.5	2
1985-06-12	Faziabad	24.52	36.63	1.2
1985-06-13	Faziabad	27.3	38.07	0
1985-06-14	Faziabad	28.28	40.34	0
1985-06-15	Faziabad	27.68	40.46	0
1985-06-16	Faziabad	29.13	41.36	0
1985-06-17	Faziabad	28.35	41.21	2.5
1985-06-18	Faziabad	28.64	42.47	1.2
1985-06-19	Faziabad	28.8	42.85	0
1985-06-20	Faziabad	27.86	41.08	11.3
1985-06-21	Faziabad	26.78	40.74	9.5
1985-06-22	Faziabad	27.41	37.59	1.9
1985-06-23	Faziabad	27.98	39.72	0
1985-06-24	Faziabad	28.61	37.82	0
1985-06-25	Faziabad	27.59	38.64	1.7
1985-06-26	Faziabad	27.53	37.69	0
1985-06-27	Faziabad	26.33	37.62	0
1985-06-28	Faziabad	24.89	32.47	2.8
1985-06-29	Faziabad	24.75	31.91	0
1985-06-30	Faziabad	25.79	34.97	0
1985-07-01	Faziabad	26.55	36.3	0
1985-07-02	Faziabad	25.82	34.25	0.3
1985-07-03	Faziabad	27.84	34.7	0
1985-07-04	Faziabad	27.45	37.16	6.1
1985-07-05	Faziabad	26.96	34.04	0
1985-07-06	Faziabad	25.78	33.43	37.8
1985-07-07	Faziabad	24.78	29.61	7
1985-07-08	Faziabad	24.62	30.55	4.1
1985-07-09	Faziabad	24.43	32.39	20.1
1985-07-10	Faziabad	23.73	31.44	12.4
1985-07-11	Faziabad	25.58	31.78	7.1
1985-07-12	Faziabad	25.48	31.47	0
1985-07-13	Faziabad	25.43	32.72	3
1985-07-14	Faziabad	25.22	33.43	0
1985-07-15	Faziabad	24.09	30	4.3
1985-07-16	Faziabad	24.6	31.12	10.5
1985-07-17	Faziabad	25.67	32.17	3.5
1985-07-18	Faziabad	24.95	32.16	14.6
1985-07-19	Faziabad	24.88	32.07	9.7
1985-07-20	Faziabad	24.53	31.45	31.6
1985-07-21	Faziabad	24.73	31.24	35
1985-07-22	Faziabad	24.35	31.45	6
1985-07-23	Faziabad	25.98	32.34	2.1
1985-07-24	Faziabad	24.57	31.54	59.1
1985-07-25	Faziabad	24.2	29.55	13.5
1985-07-26	Faziabad	23.94	29.23	35.6
1985-07-27	Faziabad	24.43	30.73	2.1
1985-07-28	Faziabad	25.31	30.73	32.3
1985-07-29	Faziabad	24.67	28.95	84.1
1985-07-30	Faziabad	24.91	29.81	16.3
1985-07-31	Faziabad	25.7	31.46	0
1985-08-01	Faziabad	26.34	33.59	0.6
1985-08-02	Faziabad	24.77	34.37	4.3
1985-08-03	Faziabad	25.73	32.27	2.2
1985-08-04	Faziabad	25.08	32.59	1.3
1985-08-05	Faziabad	26.3	32.66	13.4
1985-08-06	Faziabad	23.05	33.21	18.8
1985-08-07	Faziabad	24.73	32.43	8
1985-08-08	Faziabad	25.64	32	0.4
1985-08-09	Faziabad	25.35	31.69	0
1985-08-10	Faziabad	25.36	31.71	0
1985-08-11	Faziabad	25.66	32.59	0
1985-08-12	Faziabad	26.88	33.95	1.2
1985-08-13	Faziabad	27.67	35.29	0
1985-08-14	Faziabad	26.47	35.5	0.2
1985-08-15	Faziabad	26.61	33.68	0
1985-08-16	Faziabad	26.72	33.49	0
1985-08-17	Faziabad	27.07	33.31	5.2
1985-08-18	Faziabad	27.43	34.75	0.7
1985-08-19	Faziabad	25.12	34.1	68.1
1985-08-20	Faziabad	25.25	32.29	13.9
1985-08-21	Faziabad	25	31.64	71.6
1985-08-22	Faziabad	25.09	30.64	10
1985-08-23	Faziabad	25.24	30.09	45.7
1985-08-24	Faziabad	25.38	32.17	6.6
1985-08-25	Faziabad	25.73	32.98	0.2
1985-08-26	Faziabad	25.71	33.41	0.3
1985-08-27	Faziabad	25.73	33.14	0
1985-08-28	Faziabad	26.14	33.04	13.3
1985-08-29	Faziabad	25.99	32.88	0.4
1985-08-30	Faziabad	25.18	33.79	4.2
1985-08-31	Faziabad	26.18	33.41	0.2
1985-09-01	Faziabad	25	33.52	0
1985-09-02	Faziabad	25.52	32.35	13.6
1985-09-03	Faziabad	25.61	32.12	3
1985-09-04	Faziabad	25.58	32.44	5.5
1985-09-05	Faziabad	25.09	32.25	16.3
1985-09-06	Faziabad	24.53	33.06	0.8
1985-09-07	Faziabad	24.94	32.91	0
1985-09-08	Faziabad	25.05	34.1	0
1985-09-09	Faziabad	25.47	34.42	5.8
1985-09-10	Faziabad	26.15	34.27	0
1985-09-11	Faziabad	24.53	33.58	0.7
1985-09-12	Faziabad	24.46	31.56	6.7
1985-09-13	Faziabad	25.13	32.33	3.1
1985-09-14	Faziabad	24.37	31.99	0
1985-09-15	Faziabad	24.28	30.27	2
1985-09-16	Faziabad	23.89	30.4	16.1
1985-09-17	Faziabad	23.22	28.74	68.5
1985-09-18	Faziabad	23.31	28.97	2
1985-09-19	Faziabad	23.23	30.24	4.4
1985-09-20	Faziabad	24.23	31.87	4.3
1985-09-21	Faziabad	23.91	31.97	4.8
1985-09-22	Faziabad	24.62	31.58	0.4
1985-09-23	Faziabad	24.95	31.84	3.9
1985-09-24	Faziabad	24.42	32.36	2.5
1985-09-25	Faziabad	23.27	30.9	72.8
1985-09-26	Faziabad	22.7	28.67	17.6
1985-09-27	Faziabad	23.02	29.26	6.5
1985-09-28	Faziabad	24.02	32.58	0
1985-09-29	Faziabad	23.86	33.59	24.1
1985-09-30	Faziabad	23.39	32.42	0
1985-10-01	Faziabad	23.91	32.56	0
1985-10-02	Faziabad	23.88	32.5	0
1985-10-03	Faziabad	23.87	32.85	0
1985-10-04	Faziabad	24.57	33.27	0
1985-10-05	Faziabad	24.01	32.45	0
1985-10-06	Faziabad	22.37	29.93	1.4
1985-10-07	Faziabad	21.63	29.43	12.9
1985-10-08	Faziabad	22.61	28.21	0
1985-10-09	Faziabad	22.16	26.88	18.3
1985-10-10	Faziabad	21.68	28.25	47.5
1985-10-11	Faziabad	21.74	27.78	18.1
1985-10-12	Faziabad	22.97	29.99	0.3
1985-10-13	Faziabad	23.67	29.39	0
1985-10-14	Faziabad	24.15	32.52	0
1985-10-15	Faziabad	22.93	31.8	10.2
1985-10-16	Faziabad	22.05	30.33	0
1985-10-17	Faziabad	22.26	29.15	0
1985-10-18	Faziabad	17.27	30.01	0
1985-10-19	Faziabad	16.43	29.68	0
1985-10-20	Faziabad	16.77	29.58	0
1985-10-21	Faziabad	17.73	30.47	0
1985-10-22	Faziabad	18.77	30.67	0
1985-10-23	Faziabad	18.12	30.85	0
1985-10-24	Faziabad	17.2	31.11	0
1985-10-25	Faziabad	16.73	31.47	0
1985-10-26	Faziabad	17.14	31.26	0
1985-10-27	Faziabad	17.04	30.88	0
1985-10-28	Faziabad	16.37	30.2	0
1985-10-29	Faziabad	15.65	30.52	0
1985-10-30	Faziabad	15.94	30.11	0
1985-10-31	Faziabad	16.52	30.27	0
1985-11-01	Faziabad	17.12	30.94	0
1985-11-02	Faziabad	17.7	30.16	0
1985-11-03	Faziabad	17.98	30.19	0
1985-11-04	Faziabad	17.56	30.38	0
1985-11-05	Faziabad	16.74	29.59	0
1985-11-06	Faziabad	16.14	29.29	0.2
1985-11-07	Faziabad	15.01	29.33	0
1985-11-08	Faziabad	14.7	28.94	0
1985-11-09	Faziabad	14.73	29.87	0
1985-11-10	Faziabad	14.98	29.21	0
1985-11-11	Faziabad	15.2	30.56	0
1985-11-12	Faziabad	15.23	29.95	0
1985-11-13	Faziabad	14.1	29.75	0
1985-11-14	Faziabad	12.73	29.05	0
1985-11-15	Faziabad	12.94	28.56	0
1985-11-16	Faziabad	13.2	28.55	0
1985-11-17	Faziabad	13.28	29.21	0
1985-11-18	Faziabad	13.49	29.07	0
1985-11-19	Faziabad	13.28	28.13	0
1985-11-20	Faziabad	13.29	27.21	0
1985-11-21	Faziabad	12.69	27.59	0
1985-11-22	Faziabad	12.84	28.04	0
1985-11-23	Faziabad	12.99	28.02	0
1985-11-24	Faziabad	12.45	28.15	0
1985-11-25	Faziabad	11.23	28.07	0
1985-11-26	Faziabad	10.44	27.99	0
1985-11-27	Faziabad	10.47	26.35	0
1985-11-28	Faziabad	9.77	27.34	0
1985-11-29	Faziabad	9.68	26.57	0
1985-11-30	Faziabad	10.26	25.7	0
1985-12-01	Faziabad	10.96	26.16	0
1985-12-02	Faziabad	11.17	26.38	0
1985-12-03	Faziabad	9.6	26.4	0
1985-12-04	Faziabad	8.91	25.61	0
1985-12-05	Faziabad	9.13	25.59	0
1985-12-06	Faziabad	9.64	26.63	0
1985-12-07	Faziabad	9.9	26.3	0
1985-12-08	Faziabad	10.55	26.54	0
1985-12-09	Faziabad	10.18	26.64	0
1985-12-10	Faziabad	8.82	26.15	0
1985-12-11	Faziabad	8.93	24.85	0.2
1985-12-12	Faziabad	11.56	25.72	0.5
1985-12-13	Faziabad	12.43	25.83	0.5
1985-12-14	Faziabad	12.97	26.64	0.7
1985-12-15	Faziabad	13.51	27.94	0
1985-12-16	Faziabad	13.61	29.04	0.4
1985-12-17	Faziabad	14.14	28.78	0
1985-12-18	Faziabad	15	27.98	0
1985-12-19	Faziabad	11.09	26.36	0
1985-12-20	Faziabad	8.83	24.92	0
1985-12-21	Faziabad	8.52	24	0
1985-12-22	Faziabad	9.19	25.02	0
1985-12-23	Faziabad	10.17	24.79	0
1985-12-24	Faziabad	10.99	25.26	0
1985-12-25	Faziabad	12.37	25.31	0
1985-12-26	Faziabad	14.36	25.63	0.5
1985-12-27	Faziabad	13.83	22.52	19.4
1985-12-28	Faziabad	12.76	22.37	0.5
1985-12-29	Faziabad	8.78	20.84	0
1985-12-30	Faziabad	8.58	21.25	0
1985-12-31	Faziabad	7.29	21.84	0
1986-01-01	Faziabad	6.06	19.51	0
1986-01-02	Faziabad	6.54	17.79	0
1986-01-03	Faziabad	6.39	19.52	0
1986-01-04	Faziabad	6.54	20.17	0
1986-01-05	Faziabad	4.92	19.87	0
1986-01-06	Faziabad	3.96	20.23	0
1986-01-07	Faziabad	4.63	21.12	0
1986-01-08	Faziabad	6.55	22.3	0
1986-01-09	Faziabad	7.4	23.54	0
1986-01-10	Faziabad	8.74	24.38	0
1986-01-11	Faziabad	8.33	24.52	0
1986-01-12	Faziabad	10.19	24.6	0
1986-01-13	Faziabad	9.12	24.94	0
1986-01-14	Faziabad	8.62	25.57	0
1986-01-15	Faziabad	8.32	25.34	0
1986-01-16	Faziabad	7.92	24.11	0
1986-01-17	Faziabad	7.39	23.1	0
1986-01-18	Faziabad	7.58	23.49	0
1986-01-19	Faziabad	7.13	24.25	0
1986-01-20	Faziabad	8.2	24.36	0
1986-01-21	Faziabad	11.18	22.55	0
1986-01-22	Faziabad	9.71	25.14	0
1986-01-23	Faziabad	11.15	25.83	0
1986-01-24	Faziabad	11.01	26.27	0
1986-01-25	Faziabad	7.02	24.02	0
1986-01-26	Faziabad	11.64	24.84	0
1986-01-27	Faziabad	9.94	23.01	0
1986-01-28	Faziabad	11.37	25.73	0
1986-01-29	Faziabad	13.43	23.58	0
1986-01-30	Faziabad	12.53	22.17	0
1986-01-31	Faziabad	12.44	24.85	0
1986-02-01	Faziabad	9.58	24	0
1986-02-02	Faziabad	8.22	23.49	0
1986-02-03	Faziabad	8.43	23.64	0
1986-02-04	Faziabad	10.56	24.99	0
1986-02-05	Faziabad	13.13	26.35	0
1986-02-06	Faziabad	12.02	25.22	0
1986-02-07	Faziabad	10.96	26.27	0
1986-02-08	Faziabad	11.04	24.07	0
1986-02-09	Faziabad	13.13	26.16	0
1986-02-10	Faziabad	13.86	25.03	25.1
1986-02-11	Faziabad	12.96	20.26	12.5
1986-02-12	Faziabad	12.23	23.76	0
1986-02-13	Faziabad	13.06	25.05	0
1986-02-14	Faziabad	14.41	26.68	0.7
1986-02-15	Faziabad	12.47	25.28	9.4
1986-02-16	Faziabad	11.51	25.69	0
1986-02-17	Faziabad	9.47	24.34	0
1986-02-18	Faziabad	9.6	24.18	0
1986-02-19	Faziabad	12.22	25.64	0
1986-02-20	Faziabad	9.99	26.81	0
1986-02-21	Faziabad	12.3	26.12	0
1986-02-22	Faziabad	14.86	28.02	0
1986-02-23	Faziabad	13.34	28.44	0
1986-02-24	Faziabad	10.26	26.06	0
1986-02-25	Faziabad	9.96	26.01	0
1986-02-26	Faziabad	9.52	25.65	0
1986-02-27	Faziabad	9.69	26.18	0
1986-02-28	Faziabad	9.71	26.51	0
1986-03-01	Faziabad	11.59	26.77	0
1986-03-02	Faziabad	11.87	28.38	0
1986-03-03	Faziabad	12.21	29.22	0
1986-03-04	Faziabad	11.43	29.02	0
1986-03-05	Faziabad	12.35	29.47	0
1986-03-06	Faziabad	13.09	30.07	0
1986-03-07	Faziabad	13.66	30.68	0
1986-03-08	Faziabad	14.49	31.5	0
1986-03-09	Faziabad	14.6	32.43	0
1986-03-10	Faziabad	16.28	32.92	0
1986-03-11	Faziabad	18.62	33.69	0
1986-03-12	Faziabad	18.6	34.13	0
1986-03-13	Faziabad	18.11	33.96	0
1986-03-14	Faziabad	17.5	34.7	0
1986-03-15	Faziabad	17.47	35.42	0
1986-03-16	Faziabad	14.8	33.36	0
1986-03-17	Faziabad	12.95	29.78	0
1986-03-18	Faziabad	15.66	31.22	0
1986-03-19	Faziabad	16.74	32.12	0
1986-03-20	Faziabad	15.74	32.77	0
1986-03-21	Faziabad	12.98	30.89	0
1986-03-22	Faziabad	14.96	32.04	0
1986-03-23	Faziabad	17.86	34.78	0
1986-03-24	Faziabad	16.71	34.25	0
1986-03-25	Faziabad	16.08	33.99	0
1986-03-26	Faziabad	14.69	33.02	0
1986-03-27	Faziabad	16.76	33.2	0
1986-03-28	Faziabad	17.99	35.48	0
1986-03-29	Faziabad	18.72	37.3	0
1986-03-30	Faziabad	20.17	39.53	0
1986-03-31	Faziabad	19.61	40.01	0
1986-04-01	Faziabad	19.04	38.01	0
1986-04-02	Faziabad	17.81	36.92	0
1986-04-03	Faziabad	19.87	37.36	0
1986-04-04	Faziabad	19.32	34.58	0.5
1986-04-05	Faziabad	14.34	32.94	0
1986-04-06	Faziabad	14.88	31.63	0
1986-04-07	Faziabad	16.04	33.57	0
1986-04-08	Faziabad	19.41	35.95	0
1986-04-09	Faziabad	19.17	37.78	0
1986-04-10	Faziabad	20.45	37.88	0
1986-04-11	Faziabad	21.97	38.01	0
1986-04-12	Faziabad	22.26	38.49	0
1986-04-13	Faziabad	23.27	40.1	0
1986-04-14	Faziabad	22.59	39.38	0
1986-04-15	Faziabad	23.89	40.75	0
1986-04-16	Faziabad	23.23	40.08	0
1986-04-17	Faziabad	22.86	38.55	0
1986-04-18	Faziabad	20.86	39.27	0
1986-04-19	Faziabad	21.02	40.12	0
1986-04-20	Faziabad	21.49	40.83	0
1986-04-21	Faziabad	22.23	40.76	0
1986-04-22	Faziabad	24.48	40.2	0
1986-04-23	Faziabad	24.5	39.4	0
1986-04-24	Faziabad	22.24	40.47	3.3
1986-04-25	Faziabad	23.26	38.05	5.1
1986-04-26	Faziabad	23.37	35.79	0
1986-04-27	Faziabad	22.39	37.35	0
1986-04-28	Faziabad	20.64	36.16	0.7
1986-04-29	Faziabad	21.1	35.98	0
1986-04-30	Faziabad	21.44	37.21	0
1986-05-01	Faziabad	21.39	38.42	0
1986-05-02	Faziabad	23.54	39.22	0
1986-05-03	Faziabad	24.42	39.03	0
1986-05-04	Faziabad	22.88	40.22	0
1986-05-05	Faziabad	22.03	39.26	0
1986-05-06	Faziabad	22.47	38.94	0
1986-05-07	Faziabad	22.65	39.51	0
1986-05-08	Faziabad	23.57	36.28	0
1986-05-09	Faziabad	24.04	36.63	0
1986-05-10	Faziabad	23.86	37.75	0
1986-05-11	Faziabad	23.68	38.69	0
1986-05-12	Faziabad	23.72	39.36	0
1986-05-13	Faziabad	24.49	39.64	0
1986-05-14	Faziabad	22.28	37.41	0
1986-05-15	Faziabad	23.02	36.29	9.8
1986-05-16	Faziabad	22.02	37	10
1986-05-17	Faziabad	22.5	34.43	0
1986-05-18	Faziabad	22.68	34.65	4.8
1986-05-19	Faziabad	22.32	35.42	0.3
1986-05-20	Faziabad	24.33	33.02	0
1986-05-21	Faziabad	23.03	35.96	5
1986-05-22	Faziabad	23.27	36.44	0.3
1986-05-23	Faziabad	20.26	37.78	0
1986-05-24	Faziabad	20.81	38.2	0
1986-05-25	Faziabad	21.23	38.62	0
1986-05-26	Faziabad	23.68	39.63	0
1986-05-27	Faziabad	25.61	40.33	0
1986-05-28	Faziabad	22.56	38.57	2.3
1986-05-29	Faziabad	23.79	36.42	7.5
1986-05-30	Faziabad	24.99	37.8	9.6
1986-05-31	Faziabad	24.39	38.5	0
1986-06-01	Faziabad	25.16	39.36	0
1986-06-02	Faziabad	24.34	37.91	0
1986-06-03	Faziabad	24.25	39.55	0
1986-06-04	Faziabad	24.57	40.22	0
1986-06-05	Faziabad	25.72	40.82	0
1986-06-06	Faziabad	25.37	41.04	0
1986-06-07	Faziabad	24.96	41.22	0
1986-06-08	Faziabad	25.75	41.91	0
1986-06-09	Faziabad	26.77	42.4	0
1986-06-10	Faziabad	25.12	42.96	0
1986-06-11	Faziabad	27.78	43.53	0
1986-06-12	Faziabad	29.06	42.76	0
1986-06-13	Faziabad	27.59	39.96	4.9
1986-06-14	Faziabad	25.08	37.25	0
1986-06-15	Faziabad	26.99	37.5	0
1986-06-16	Faziabad	27.48	37.6	0
1986-06-17	Faziabad	28.03	38.61	0
1986-06-18	Faziabad	28.28	38.67	0
1986-06-19	Faziabad	27.81	38.61	11
1986-06-20	Faziabad	25.8	36.25	21.7
1986-06-21	Faziabad	27.08	34.99	0
1986-06-22	Faziabad	27.3	36.25	0
1986-06-23	Faziabad	27.54	36.37	0
1986-06-24	Faziabad	28.73	38.13	35.2
1986-06-25	Faziabad	26.04	35.66	2.3
1986-06-26	Faziabad	25.34	33.09	7.9
1986-06-27	Faziabad	25.58	33.48	2.3
1986-06-28	Faziabad	24.98	32.27	3.4
1986-06-29	Faziabad	24.41	33.09	22.9
1986-06-30	Faziabad	24.17	33.54	3.9
1986-07-01	Faziabad	24.01	33.98	35.6
1986-07-02	Faziabad	24.55	31.93	30.1
1986-07-03	Faziabad	25.08	31.04	18.4
1986-07-04	Faziabad	26.64	34.43	1.8
1986-07-05	Faziabad	28.8	36.86	0.1
1986-07-06	Faziabad	26.13	36.59	6.6
1986-07-07	Faziabad	25.48	32.4	3
1986-07-08	Faziabad	24.74	33.67	14.8
1986-07-09	Faziabad	24.78	30.36	5.5
1986-07-10	Faziabad	25.39	30.32	16.5
1986-07-11	Faziabad	24.06	31.3	21.9
1986-07-12	Faziabad	26.19	32.98	0.9
1986-07-13	Faziabad	26.27	35.01	0
1986-07-14	Faziabad	26.48	34.88	0.8
1986-07-15	Faziabad	26.59	33.49	0
1986-07-16	Faziabad	26.81	34.31	5.1
1986-07-17	Faziabad	25.92	32.96	2.2
1986-07-18	Faziabad	24.46	31.18	6.6
1986-07-19	Faziabad	25.36	31.7	3.2
1986-07-20	Faziabad	26.06	32.63	1.5
1986-07-21	Faziabad	24.98	33.06	1.9
1986-07-22	Faziabad	25.73	33.34	0
1986-07-23	Faziabad	25.8	33.57	2.2
1986-07-24	Faziabad	25.06	32.01	6.6
1986-07-25	Faziabad	24.73	31.67	43.4
1986-07-26	Faziabad	24.54	30.98	30.7
1986-07-27	Faziabad	23.96	30.37	15.5
1986-07-28	Faziabad	23.67	29.53	20.2
1986-07-29	Faziabad	23.71	29.82	5.1
1986-07-30	Faziabad	24.81	31.32	1.5
1986-07-31	Faziabad	25.64	32.64	4.6
1986-08-01	Faziabad	25.11	31.2	8.9
1986-08-02	Faziabad	25.32	31.97	17.2
1986-08-03	Faziabad	24.5	32.65	14.2
1986-08-04	Faziabad	24.21	29.73	2.4
1986-08-05	Faziabad	25.92	33.08	0
1986-08-06	Faziabad	25.76	33.51	0.9
1986-08-07	Faziabad	25.96	34.02	0
1986-08-08	Faziabad	26.45	33.22	0
1986-08-09	Faziabad	26.1	34.4	0
1986-08-10	Faziabad	26.58	35.08	0
1986-08-11	Faziabad	27.95	35.95	0
1986-08-12	Faziabad	25.17	36.67	21.3
1986-08-13	Faziabad	26.02	33.2	4.8
1986-08-14	Faziabad	26.1	34.33	0
1986-08-15	Faziabad	26.34	32.56	0.8
1986-08-16	Faziabad	25.59	33.07	0.9
1986-08-17	Faziabad	25.52	33.99	3.9
1986-08-18	Faziabad	24.49	32.07	3.7
1986-08-19	Faziabad	24.81	31.64	5.7
1986-08-20	Faziabad	25.31	31.62	26.5
1986-08-21	Faziabad	25	32.45	2.5
1986-08-22	Faziabad	24.49	31.37	37.5
1986-08-23	Faziabad	24.91	30.19	13.5
1986-08-24	Faziabad	24.17	30.7	56.4
1986-08-25	Faziabad	24.09	31.26	19.6
1986-08-26	Faziabad	24.59	32.61	8.6
1986-08-27	Faziabad	24.51	32.97	0
1986-08-28	Faziabad	24.46	33.32	0
1986-08-29	Faziabad	25.3	34.16	0
1986-08-30	Faziabad	25.41	35.19	0
1986-08-31	Faziabad	25.61	35.08	0
1986-09-01	Faziabad	25.37	34.85	0
1986-09-02	Faziabad	25.38	34.86	1.6
1986-09-03	Faziabad	25.57	35.54	3.3
1986-09-04	Faziabad	25.02	34.78	0
1986-09-05	Faziabad	25.12	34.76	0.8
1986-09-06	Faziabad	25.53	35.66	0.3
1986-09-07	Faziabad	24.77	35.78	0.8
1986-09-08	Faziabad	24.86	36.11	0.5
1986-09-09	Faziabad	25.03	36.06	2.8
1986-09-10	Faziabad	25.06	33.9	11.1
1986-09-11	Faziabad	24.03	32.21	31.1
1986-09-12	Faziabad	23.97	30.98	7.9
1986-09-13	Faziabad	23.79	28.22	24.8
1986-09-14	Faziabad	23.39	28.55	65
1986-09-15	Faziabad	23.02	29.67	5
1986-09-16	Faziabad	23.8	30.74	0.1
1986-09-17	Faziabad	24	33.5	4.6
1986-09-18	Faziabad	22.84	34.1	0
1986-09-19	Faziabad	23.45	34.71	0.3
1986-09-20	Faziabad	23.15	34.68	0
1986-09-21	Faziabad	24.47	35.4	0
1986-09-22	Faziabad	24.71	34.07	0.9
1986-09-23	Faziabad	24.91	33.68	3.2
1986-09-24	Faziabad	23.74	32.72	1.6
1986-09-25	Faziabad	23.05	31.79	1.2
1986-09-26	Faziabad	23.24	32.03	0.1
1986-09-27	Faziabad	22.16	30.28	1.6
1986-09-28	Faziabad	20.49	29.71	2.5
1986-09-29	Faziabad	21.78	26.62	0.8
1986-09-30	Faziabad	21.86	28.85	2.6
1986-10-01	Faziabad	21.01	29.82	32.5
1986-10-02	Faziabad	21.96	30.36	0
1986-10-03	Faziabad	22.65	32	0
1986-10-04	Faziabad	22.99	32.25	0
1986-10-05	Faziabad	23.3	32.9	2.1
1986-10-06	Faziabad	23.12	31.56	0
1986-10-07	Faziabad	21.9	30.05	2.2
1986-10-08	Faziabad	20.87	29.15	0
1986-10-09	Faziabad	20.2	29.52	0
1986-10-10	Faziabad	21.89	30.8	0
1986-10-11	Faziabad	22.22	32.13	0
1986-10-12	Faziabad	21.74	32.12	0
1986-10-13	Faziabad	22.21	32.37	3.3
1986-10-14	Faziabad	22.13	32.56	0
1986-10-15	Faziabad	19.57	33.82	16.5
1986-10-16	Faziabad	19.76	32.99	0
1986-10-17	Faziabad	19.93	31.36	0.6
1986-10-18	Faziabad	20.11	31.16	0
1986-10-19	Faziabad	20.05	30.96	0
1986-10-20	Faziabad	19.77	31.94	0
1986-10-21	Faziabad	16.59	31.54	0
1986-10-22	Faziabad	14.94	30.59	0
1986-10-23	Faziabad	15.28	30.8	0
1986-10-24	Faziabad	15.87	31.18	0
1986-10-25	Faziabad	15.35	31.33	0
1986-10-26	Faziabad	15.06	31.53	0
1986-10-27	Faziabad	15.07	31.25	0
1986-10-28	Faziabad	15.22	31.13	0
1986-10-29	Faziabad	15.83	31.07	0
1986-10-30	Faziabad	16.28	31.59	0
1986-10-31	Faziabad	16.49	31.19	0
1986-11-01	Faziabad	16.56	31.18	0
1986-11-02	Faziabad	16.73	30.97	0
1986-11-03	Faziabad	16.28	31.27	0
1986-11-04	Faziabad	18.37	31.69	0
1986-11-05	Faziabad	15.33	30.31	0
1986-11-06	Faziabad	13.99	29.91	0
1986-11-07	Faziabad	14.22	30.58	0
1986-11-08	Faziabad	15.57	30.07	0
1986-11-09	Faziabad	15.92	30.64	0
1986-11-10	Faziabad	15.88	30.18	0
1986-11-11	Faziabad	13.57	29.62	0
1986-11-12	Faziabad	14.43	30.69	0
1986-11-13	Faziabad	15.44	30.46	0
1986-11-14	Faziabad	15.99	29.84	0
1986-11-15	Faziabad	15.82	30.44	0
1986-11-16	Faziabad	15.98	30.87	0
1986-11-17	Faziabad	16.45	31.72	0
1986-11-18	Faziabad	14.63	30.33	0
1986-11-19	Faziabad	11.62	28.76	0
1986-11-20	Faziabad	12.12	28.18	0
1986-11-21	Faziabad	11.82	28.43	0
1986-11-22	Faziabad	12.39	28.4	0
1986-11-23	Faziabad	12.55	28.64	0
1986-11-24	Faziabad	11.9	28.37	0
1986-11-25	Faziabad	12.32	29.33	0
1986-11-26	Faziabad	12.97	28.91	0
1986-11-27	Faziabad	13.56	28.39	0
1986-11-28	Faziabad	13.23	28.64	0
1986-11-29	Faziabad	13.22	28.74	0
1986-11-30	Faziabad	15.24	28.24	0
1986-12-01	Faziabad	12.12	26.11	0
1986-12-02	Faziabad	10.03	25.86	0
1986-12-03	Faziabad	9.46	25.57	0
1986-12-04	Faziabad	9.94	26.17	0
1986-12-05	Faziabad	10.11	26.1	0
1986-12-06	Faziabad	10.28	26.67	0
1986-12-07	Faziabad	10.53	26.57	0
1986-12-08	Faziabad	10.9	26.42	0
1986-12-09	Faziabad	11.25	26.65	0
1986-12-10	Faziabad	12.16	26.08	0
1986-12-11	Faziabad	11.12	26.17	0
1986-12-12	Faziabad	12.16	26.45	0
1986-12-13	Faziabad	14.71	28.03	3.7
1986-12-14	Faziabad	14.45	25.19	22.7
1986-12-15	Faziabad	10.69	24.15	0
1986-12-16	Faziabad	9.57	23.7	0
1986-12-17	Faziabad	8.67	20.46	13.4
1986-12-18	Faziabad	13.41	23.68	35.5
1986-12-19	Faziabad	12.11	18.6	23.2
1986-12-20	Faziabad	11.83	20.14	0
1986-12-21	Faziabad	8.19	22.05	0
1986-12-22	Faziabad	7.15	20.69	0
1986-12-23	Faziabad	6.49	22.3	0
1986-12-24	Faziabad	7.58	21.86	0
1986-12-25	Faziabad	9.87	20.31	0
1986-12-26	Faziabad	9.95	21.23	0.7
1986-12-27	Faziabad	8.85	22.38	0
1986-12-28	Faziabad	10.46	23.88	0
1986-12-29	Faziabad	7.8	24.3	0
1986-12-30	Faziabad	7.03	22.85	0
1986-12-31	Faziabad	7.33	23.34	0
1987-01-01	Faziabad	6.84	21.99	0
1987-01-02	Faziabad	5.5	22.2	0
1987-01-03	Faziabad	6.06	23.11	0
1987-01-04	Faziabad	7.07	22.62	0
1987-01-05	Faziabad	7.04	23.61	0
1987-01-06	Faziabad	7.73	24.3	0
1987-01-07	Faziabad	8.74	24.19	0
1987-01-08	Faziabad	8.19	24.44	0
1987-01-09	Faziabad	9.18	24.68	0
1987-01-10	Faziabad	9.36	24.37	0
1987-01-11	Faziabad	13.18	21.51	0
1987-01-12	Faziabad	11.88	24.11	6.1
1987-01-13	Faziabad	10.86	23.55	0
1987-01-14	Faziabad	12.23	24.39	0
1987-01-15	Faziabad	10.29	23.9	0
1987-01-16	Faziabad	7.85	23.22	0
1987-01-17	Faziabad	11.74	22.04	0.1
1987-01-18	Faziabad	11.29	20.81	0.2
1987-01-19	Faziabad	9.7	20.47	0
1987-01-20	Faziabad	8.58	20.28	0
1987-01-21	Faziabad	7.53	18.64	0
1987-01-22	Faziabad	6.69	18.36	0
1987-01-23	Faziabad	6.86	19.11	0
1987-01-24	Faziabad	6.86	22.16	0
1987-01-25	Faziabad	6.52	22.51	0
1987-01-26	Faziabad	5.78	23.4	0
1987-01-27	Faziabad	7.27	24.46	0
1987-01-28	Faziabad	8.18	25.05	0
1987-01-29	Faziabad	9.23	26.15	0
1987-01-30	Faziabad	9.48	25.83	0
1987-01-31	Faziabad	9.55	26.59	0
1987-02-01	Faziabad	10.18	26.86	0
1987-02-02	Faziabad	10.61	26.86	0
1987-02-03	Faziabad	11.34	26.7	0
1987-02-04	Faziabad	10.28	25.22	3.7
1987-02-05	Faziabad	9.6	24.78	0
1987-02-06	Faziabad	8.64	25.34	0
1987-02-07	Faziabad	9.25	25.97	0
1987-02-08	Faziabad	9.53	26.21	0
1987-02-09	Faziabad	9.53	26.62	0
1987-02-10	Faziabad	9.84	27.14	0
1987-02-11	Faziabad	9.81	27.64	0
1987-02-12	Faziabad	10.11	27.72	2.4
1987-02-13	Faziabad	9.84	28	0
1987-02-14	Faziabad	10.92	28.11	0
1987-02-15	Faziabad	12.93	26.69	0
1987-02-16	Faziabad	14.65	26.43	0
1987-02-17	Faziabad	13.15	27.7	1.4
1987-02-18	Faziabad	13.44	28.39	0
1987-02-19	Faziabad	12.34	29.08	0
1987-02-20	Faziabad	13.4	29.76	0
1987-02-21	Faziabad	14.06	30.21	0
1987-02-22	Faziabad	15.03	30.66	0
1987-02-23	Faziabad	14.29	31	0
1987-02-24	Faziabad	14.56	31.44	0
1987-02-25	Faziabad	15.7	31.76	0
1987-02-26	Faziabad	16.19	31.2	0
1987-02-27	Faziabad	14.4	28.26	0
1987-02-28	Faziabad	11.15	28.01	0
1987-03-01	Faziabad	11.79	28.09	0
1987-03-02	Faziabad	12.04	28.4	0
1987-03-03	Faziabad	12.32	28.74	0
1987-03-04	Faziabad	12.64	29.48	0
1987-03-05	Faziabad	13.35	30.1	0
1987-03-06	Faziabad	14.68	31.46	0
1987-03-07	Faziabad	14.01	32.41	0
1987-03-08	Faziabad	15.4	33.48	0
1987-03-09	Faziabad	16.13	33.43	0
1987-03-10	Faziabad	15.9	33.02	0
1987-03-11	Faziabad	14.69	32.59	0
1987-03-12	Faziabad	16.11	28.44	1.2
1987-03-13	Faziabad	14.11	28.54	0.6
1987-03-14	Faziabad	15.03	30.8	0
1987-03-15	Faziabad	15.13	32.51	0
1987-03-16	Faziabad	17.38	33.8	0
1987-03-17	Faziabad	17.6	34.82	0
1987-03-18	Faziabad	15.69	34.19	0
1987-03-19	Faziabad	15	34.42	0
1987-03-20	Faziabad	16.33	34.09	0
1987-03-21	Faziabad	16.46	34.4	0
1987-03-22	Faziabad	17.13	34.94	0
1987-03-23	Faziabad	17.46	35.56	0
1987-03-24	Faziabad	17.92	36.1	0
1987-03-25	Faziabad	17.3	37.35	0
1987-03-26	Faziabad	19.23	35.71	0
1987-03-27	Faziabad	17.62	37.18	0
1987-03-28	Faziabad	17.66	36.32	0
1987-03-29	Faziabad	17.99	37.01	0
1987-03-30	Faziabad	17.41	37.38	0
1987-03-31	Faziabad	18.51	38.09	0
1987-04-01	Faziabad	19.07	38.63	0
1987-04-02	Faziabad	20.67	39.49	0
1987-04-03	Faziabad	21.23	39.74	0
1987-04-04	Faziabad	21.08	39.27	0
1987-04-05	Faziabad	21.33	39.35	0
1987-04-06	Faziabad	20.76	38.4	0
1987-04-07	Faziabad	20.13	38.68	0
1987-04-08	Faziabad	20.2	39.03	0
1987-04-09	Faziabad	21.81	38.87	0
1987-04-10	Faziabad	20.76	37.83	1.7
1987-04-11	Faziabad	19.84	36.78	0
1987-04-12	Faziabad	19.04	37.36	0
1987-04-13	Faziabad	20.07	38.24	0
1987-04-14	Faziabad	18.94	37.95	0
1987-04-15	Faziabad	18.62	38.55	0
1987-04-16	Faziabad	18.67	39.47	0
1987-04-17	Faziabad	19.3	39.75	0
1987-04-18	Faziabad	20.28	39.9	0
1987-04-19	Faziabad	21.63	38.92	0
1987-04-20	Faziabad	21.68	38.65	0
1987-04-21	Faziabad	23.52	39.33	0
1987-04-22	Faziabad	24.49	40.66	0
1987-04-23	Faziabad	24.85	40.09	0
1987-04-24	Faziabad	24.96	39.53	0
1987-04-25	Faziabad	22.87	38.49	0
1987-04-26	Faziabad	22.5	36.71	0
1987-04-27	Faziabad	20.19	35.19	5.2
1987-04-28	Faziabad	21.22	35.24	0
1987-04-29	Faziabad	22.01	35.95	0
1987-04-30	Faziabad	21.92	35.16	6.3
1987-05-01	Faziabad	21.42	33.69	0
1987-05-02	Faziabad	20.7	33.28	2.3
1987-05-03	Faziabad	18.12	31.59	18.6
1987-05-04	Faziabad	18.15	31.2	16.3
1987-05-05	Faziabad	19.44	32.61	0
1987-05-06	Faziabad	21.45	34.51	0
1987-05-07	Faziabad	22.81	35.05	0
1987-05-08	Faziabad	22.62	34.27	3.6
1987-05-09	Faziabad	21.39	35.44	0
1987-05-10	Faziabad	22.59	36.88	0
1987-05-11	Faziabad	20.56	37.25	0
1987-05-12	Faziabad	21.47	39.02	0
1987-05-13	Faziabad	24.8	40.14	0
1987-05-14	Faziabad	23.28	39.39	0
1987-05-15	Faziabad	24.17	39.03	0
1987-05-16	Faziabad	24.61	40.31	0
1987-05-17	Faziabad	25.09	40.71	0
1987-05-18	Faziabad	25.07	40.81	0
1987-05-19	Faziabad	24.2	41.75	0
1987-05-20	Faziabad	26.17	42.69	0
1987-05-21	Faziabad	27.04	43.38	0
1987-05-22	Faziabad	26.22	43.6	0
1987-05-23	Faziabad	26.56	42.99	0
1987-05-24	Faziabad	25.41	42.15	0
1987-05-25	Faziabad	24.78	41.28	0
1987-05-26	Faziabad	23.89	42.31	0
1987-05-27	Faziabad	25.95	42.72	0
1987-05-28	Faziabad	25.59	43.45	0
1987-05-29	Faziabad	26.99	42.44	0
1987-05-30	Faziabad	28.07	42.78	0
1987-05-31	Faziabad	28.35	43.72	0
1987-06-01	Faziabad	29.26	43.75	0
1987-06-02	Faziabad	27.2	42.62	0.2
1987-06-03	Faziabad	28.11	41	2
1987-06-04	Faziabad	28.55	41.15	0.3
1987-06-05	Faziabad	28.34	42.23	0
1987-06-06	Faziabad	27.91	42.35	0
1987-06-07	Faziabad	29.78	41.1	0
1987-06-08	Faziabad	27.53	39.31	4.8
1987-06-09	Faziabad	27.35	37.66	0
1987-06-10	Faziabad	24.69	37.13	6.2
1987-06-11	Faziabad	26	38.13	0
1987-06-12	Faziabad	27.75	40	0
1987-06-13	Faziabad	28.17	40.56	0
1987-06-14	Faziabad	28.02	41.46	0
1987-06-15	Faziabad	28.99	42.39	0
1987-06-16	Faziabad	29.22	41.01	0
1987-06-17	Faziabad	30.05	40.77	0
1987-06-18	Faziabad	28.2	41.99	5.3
1987-06-19	Faziabad	26.7	42.66	0
1987-06-20	Faziabad	26.95	43.35	0
1987-06-21	Faziabad	27.98	42.52	0
1987-06-22	Faziabad	27.93	39.25	0.3
1987-06-23	Faziabad	27.55	39.06	3.4
1987-06-24	Faziabad	27.65	41.67	1.8
1987-06-25	Faziabad	28.94	43.05	0
1987-06-26	Faziabad	28.68	43.85	0
1987-06-27	Faziabad	28.49	43.89	0
1987-06-28	Faziabad	29.15	43.88	0
1987-06-29	Faziabad	29.09	43.17	0
1987-06-30	Faziabad	28.36	43.21	0
1987-07-01	Faziabad	30.7	42.02	0
1987-07-02	Faziabad	28.08	41.46	0
1987-07-03	Faziabad	27.35	39.36	3.1
1987-07-04	Faziabad	26.69	35.86	64.2
1987-07-05	Faziabad	25.97	36.57	0.4
1987-07-06	Faziabad	26.41	34.33	2.3
1987-07-07	Faziabad	25.52	32.7	39.1
1987-07-08	Faziabad	25.63	33.11	113.1
1987-07-09	Faziabad	26.05	34.66	37
1987-07-10	Faziabad	25.52	32.52	6.5
1987-07-11	Faziabad	25.32	32.31	24.1
1987-07-12	Faziabad	25.14	31.6	29.9
1987-07-13	Faziabad	25.32	32.87	4.1
1987-07-14	Faziabad	25.66	32.92	0
1987-07-15	Faziabad	25.37	32.85	1.2
1987-07-16	Faziabad	26.25	35.17	0.6
1987-07-17	Faziabad	27	35.86	1
1987-07-18	Faziabad	27.61	35.71	0
1987-07-19	Faziabad	26.02	34.39	0.4
1987-07-20	Faziabad	26.34	34.85	5.2
1987-07-21	Faziabad	26.82	33.34	0
1987-07-22	Faziabad	26.73	34.53	0
1987-07-23	Faziabad	26.07	32.5	2.5
1987-07-24	Faziabad	26.35	34.64	15.1
1987-07-25	Faziabad	24.59	31.74	45.7
1987-07-26	Faziabad	24.45	31.78	0.4
1987-07-27	Faziabad	24.63	33.22	0.9
1987-07-28	Faziabad	25.12	33.03	1.4
1987-07-29	Faziabad	25.69	32.69	5.1
1987-07-30	Faziabad	25.63	32.91	43.7
1987-07-31	Faziabad	26.13	34.91	0.9
1987-08-01	Faziabad	27.67	34.67	0.4
1987-08-02	Faziabad	26.59	33.62	0
1987-08-03	Faziabad	24.74	33.37	1
1987-08-04	Faziabad	24.95	32.54	0
1987-08-05	Faziabad	25.92	32.81	2.6
1987-08-06	Faziabad	25.81	33.36	2.5
1987-08-07	Faziabad	25.94	34.75	0
1987-08-08	Faziabad	26.8	35.95	0
1987-08-09	Faziabad	27.38	36.24	0
1987-08-10	Faziabad	26.94	36.2	2.1
1987-08-11	Faziabad	25.21	31.99	60.3
1987-08-12	Faziabad	22.67	28.88	144.3
1987-08-13	Faziabad	23.38	29.37	7.7
1987-08-14	Faziabad	23.43	30.92	0
1987-08-15	Faziabad	25.49	33.22	0
1987-08-16	Faziabad	26.16	34.26	0
1987-08-17	Faziabad	26.21	35.31	0
1987-08-18	Faziabad	26.53	34.51	0
1987-08-19	Faziabad	25.76	35.12	3.7
1987-08-20	Faziabad	25.2	34.73	0.6
1987-08-21	Faziabad	25.43	33.22	0
1987-08-22	Faziabad	25.49	32.31	0
1987-08-23	Faziabad	26.04	32.54	0
1987-08-24	Faziabad	26.25	33.97	0
1987-08-25	Faziabad	26.58	35.32	0
1987-08-26	Faziabad	25.32	33.46	35.4
1987-08-27	Faziabad	26.07	34.09	21.8
1987-08-28	Faziabad	25.33	32.78	0.1
1987-08-29	Faziabad	25.54	32.27	0
1987-08-30	Faziabad	25.15	33.01	0.9
1987-08-31	Faziabad	25.29	33.71	10.1
1987-09-01	Faziabad	25.73	34.3	0
1987-09-02	Faziabad	25.69	34.4	0
1987-09-03	Faziabad	25.13	32.44	18.3
1987-09-04	Faziabad	24.68	32.34	0.6
1987-09-05	Faziabad	25.11	30.88	6.2
1987-09-06	Faziabad	25.14	30.6	55.4
1987-09-07	Faziabad	25.51	32.16	6.8
1987-09-08	Faziabad	23.86	29.59	49
1987-09-09	Faziabad	23.76	29.84	68.5
1987-09-10	Faziabad	23.91	29.84	76.5
1987-09-11	Faziabad	23.62	29.98	10.5
1987-09-12	Faziabad	23.58	29.35	6.4
1987-09-13	Faziabad	23.64	29.74	5
1987-09-14	Faziabad	24.76	31.52	0.7
1987-09-15	Faziabad	25.56	32.57	0.9
1987-09-16	Faziabad	25.58	33.21	0.1
1987-09-17	Faziabad	25.73	34.55	0
1987-09-18	Faziabad	26.23	35.5	0.8
1987-09-19	Faziabad	26.16	35.72	0
1987-09-20	Faziabad	25.53	33.06	0.8
1987-09-21	Faziabad	25.01	33.06	31.4
1987-09-22	Faziabad	24.03	32.15	54.5
1987-09-23	Faziabad	24.3	32.64	2.5
1987-09-24	Faziabad	24.45	33.16	0
1987-09-25	Faziabad	24.91	34.63	0
1987-09-26	Faziabad	25.09	35.37	0
1987-09-27	Faziabad	24.28	35.07	0
1987-09-28	Faziabad	24.52	35.54	0
1987-09-29	Faziabad	24.94	35.54	0
1987-09-30	Faziabad	24.41	36.22	0
1987-10-01	Faziabad	24.08	36.13	0
1987-10-02	Faziabad	23.13	35.44	0
1987-10-03	Faziabad	23.04	35.39	0
1987-10-04	Faziabad	24.61	33.08	0
1987-10-05	Faziabad	22.45	32.89	0
1987-10-06	Faziabad	22.43	32.93	0
1987-10-07	Faziabad	21.76	32.86	0
1987-10-08	Faziabad	21.61	33.4	0
1987-10-09	Faziabad	21.81	33.61	0
1987-10-10	Faziabad	21.69	33.97	4.2
1987-10-11	Faziabad	22.11	34.97	0
1987-10-12	Faziabad	22.28	36.01	0
1987-10-13	Faziabad	22.56	35.62	0
1987-10-14	Faziabad	22.32	35.75	0
1987-10-15	Faziabad	22.37	35.59	0
1987-10-16	Faziabad	22.2	34.36	0
1987-10-17	Faziabad	21.94	30.6	0
1987-10-18	Faziabad	21.08	28.22	1.3
1987-10-19	Faziabad	20.59	26.51	49.8
1987-10-20	Faziabad	19.38	29.41	96.1
1987-10-21	Faziabad	16.39	29.32	0
1987-10-22	Faziabad	15.17	30.14	0
1987-10-23	Faziabad	16.47	30.72	0
1987-10-24	Faziabad	17.19	30.96	0
1987-10-25	Faziabad	17.59	31.31	0
1987-10-26	Faziabad	17.9	31.24	0
1987-10-27	Faziabad	18.15	30.91	0
1987-10-28	Faziabad	18.06	31.09	0
1987-10-29	Faziabad	18.56	31.28	0
1987-10-30	Faziabad	18.95	31.63	0
1987-10-31	Faziabad	19.83	32.76	0
1987-11-01	Faziabad	19.03	32.59	0
1987-11-02	Faziabad	16.67	32.59	0
1987-11-03	Faziabad	16.57	31.55	0
1987-11-04	Faziabad	17.2	30.73	0
1987-11-05	Faziabad	15.56	30.28	0
1987-11-06	Faziabad	14.92	30.46	0
1987-11-07	Faziabad	14.25	30.27	0
1987-11-08	Faziabad	14.04	30.39	0
1987-11-09	Faziabad	14.49	30.4	0
1987-11-10	Faziabad	14.53	30.12	0
1987-11-11	Faziabad	14.77	30.08	0
1987-11-12	Faziabad	14.93	30.34	0
1987-11-13	Faziabad	16.32	29.72	0
1987-11-14	Faziabad	16.85	30.43	0
1987-11-15	Faziabad	16.92	29.61	0
1987-11-16	Faziabad	15.4	30.2	0
1987-11-17	Faziabad	14.49	30.71	0
1987-11-18	Faziabad	13.82	29.56	0
1987-11-19	Faziabad	14.95	28.83	0
1987-11-20	Faziabad	13.14	29.17	0
1987-11-21	Faziabad	11.53	28.59	0
1987-11-22	Faziabad	11.82	28.71	0
1987-11-23	Faziabad	12.04	28.9	0
1987-11-24	Faziabad	11.72	28.61	0
1987-11-25	Faziabad	11.7	28.53	0
1987-11-26	Faziabad	10.83	28.25	0
1987-11-27	Faziabad	11.06	28.23	0
1987-11-28	Faziabad	10.89	27.8	0
1987-11-29	Faziabad	10.06	27.61	0
1987-11-30	Faziabad	10.14	27.58	0
1987-12-01	Faziabad	9.82	28.36	0
1987-12-02	Faziabad	10.17	28.45	0
1987-12-03	Faziabad	10.51	28.21	0
1987-12-04	Faziabad	11.61	28.07	0
1987-12-05	Faziabad	9.99	26.15	0
1987-12-06	Faziabad	7.44	25.4	0
1987-12-07	Faziabad	6.96	25.1	0
1987-12-08	Faziabad	7.75	25.3	0
1987-12-09	Faziabad	8.23	26.07	0
1987-12-10	Faziabad	9.09	26.69	0
1987-12-11	Faziabad	9.86	26.35	0
1987-12-12	Faziabad	13.24	22.84	0
1987-12-13	Faziabad	12.72	21.45	2
1987-12-14	Faziabad	10.04	22.08	0
1987-12-15	Faziabad	8.4	22.64	0
1987-12-16	Faziabad	7.96	23.47	0
1987-12-17	Faziabad	8.49	24.23	0
1987-12-18	Faziabad	9.19	24.61	0
1987-12-19	Faziabad	8.85	24.73	0
1987-12-20	Faziabad	9.33	25.58	0
1987-12-21	Faziabad	9.61	25.86	0
1987-12-22	Faziabad	9.76	25.99	0
1987-12-23	Faziabad	9.98	25.81	0
1987-12-24	Faziabad	9.31	24.48	0
1987-12-25	Faziabad	8.62	24.5	0
1987-12-26	Faziabad	7.85	24.79	0
1987-12-27	Faziabad	7.94	24.54	0
1987-12-28	Faziabad	7.78	24.25	0
1987-12-29	Faziabad	8.16	23.38	0
1987-12-30	Faziabad	7.93	23.66	0
1987-12-31	Faziabad	7.47	23.54	0
1988-01-01	Faziabad	7.8	23.78	0
1988-01-02	Faziabad	8.47	23.03	0
1988-01-03	Faziabad	8.62	23.77	0
1988-01-04	Faziabad	9.05	23.29	0
1988-01-05	Faziabad	9.79	23.79	0
1988-01-06	Faziabad	10.45	23.79	0
1988-01-07	Faziabad	10.14	24.1	0
1988-01-08	Faziabad	9.87	24.44	0
1988-01-09	Faziabad	9.08	23.7	0
1988-01-10	Faziabad	8.91	24.07	0
1988-01-11	Faziabad	8.79	24.44	0
1988-01-12	Faziabad	10.16	23.45	0
1988-01-13	Faziabad	11.18	23.2	0
1988-01-14	Faziabad	11.75	24.51	0
1988-01-15	Faziabad	10.72	25.18	0
1988-01-16	Faziabad	10.73	24.55	0
1988-01-17	Faziabad	8.71	23.38	0
1988-01-18	Faziabad	8.12	23.97	0
1988-01-19	Faziabad	8.05	23.97	0
1988-01-20	Faziabad	7.58	24.82	0
1988-01-21	Faziabad	7.68	25.55	0
1988-01-22	Faziabad	9.18	25.9	0
1988-01-23	Faziabad	9.92	26.07	0
1988-01-24	Faziabad	9.12	24.39	0
1988-01-25	Faziabad	8.38	23.14	0
1988-01-26	Faziabad	5.98	22.38	0
1988-01-27	Faziabad	5.73	22.79	0
1988-01-28	Faziabad	5.64	23.32	0
1988-01-29	Faziabad	8.49	25.46	0
1988-01-30	Faziabad	7.26	24.87	0
1988-01-31	Faziabad	8.43	25.72	0
1988-02-01	Faziabad	8.87	25.54	0
1988-02-02	Faziabad	7.83	25.17	0
1988-02-03	Faziabad	8.45	24.76	0
1988-02-04	Faziabad	7.96	25.26	0
1988-02-05	Faziabad	9.88	26.61	0
1988-02-06	Faziabad	9.54	27.6	0
1988-02-07	Faziabad	10.24	27.89	0
1988-02-08	Faziabad	10.55	28.87	0
1988-02-09	Faziabad	11.01	30	0
1988-02-10	Faziabad	11.43	29.73	0
1988-02-11	Faziabad	11.28	30.31	0
1988-02-12	Faziabad	12.57	28.3	0
1988-02-13	Faziabad	13.7	29.37	0.3
1988-02-14	Faziabad	14.69	26.64	0
1988-02-15	Faziabad	13.22	26.22	1.1
1988-02-16	Faziabad	13.14	25.63	0
1988-02-17	Faziabad	10.41	26.7	0
1988-02-18	Faziabad	10.75	27.21	0
1988-02-19	Faziabad	9.68	27.42	0
1988-02-20	Faziabad	10.24	27.82	0
1988-02-21	Faziabad	11.6	29.16	0
1988-02-22	Faziabad	14.74	29.51	0.4
1988-02-23	Faziabad	15.35	27.23	1.8
1988-02-24	Faziabad	14.08	27.14	0.8
1988-02-25	Faziabad	10.06	27.01	0
1988-02-26	Faziabad	9.81	28.6	0
1988-02-27	Faziabad	11.21	30.16	0
1988-02-28	Faziabad	14.2	30.11	0
1988-02-29	Faziabad	16.19	29.09	0.4
1988-03-01	Faziabad	15.92	29.35	0.2
1988-03-02	Faziabad	13.2	28.94	0.6
1988-03-03	Faziabad	11.9	29.41	0
1988-03-04	Faziabad	11.63	30.25	0
1988-03-05	Faziabad	12.72	31.7	0
1988-03-06	Faziabad	13.79	33.07	0
1988-03-07	Faziabad	13.85	34.44	0
1988-03-08	Faziabad	16.57	33.66	0
1988-03-09	Faziabad	17.73	31.86	1.4
1988-03-10	Faziabad	16.67	32.91	0
1988-03-11	Faziabad	18.26	31.96	0
1988-03-12	Faziabad	17.19	30.27	12.3
1988-03-13	Faziabad	17.12	30.26	0
1988-03-14	Faziabad	16.18	29.93	1.1
1988-03-15	Faziabad	13.59	31.26	0.5
1988-03-16	Faziabad	13.97	34.46	0
1988-03-17	Faziabad	16.93	35.91	0
1988-03-18	Faziabad	18.95	33.31	0.3
1988-03-19	Faziabad	18.09	31.98	0.2
1988-03-20	Faziabad	13.37	30.37	11
1988-03-21	Faziabad	13.55	31.23	0
1988-03-22	Faziabad	13.03	32.92	0
1988-03-23	Faziabad	13.72	33.83	0
1988-03-24	Faziabad	16.12	35.53	0
1988-03-25	Faziabad	16.92	37.32	0
1988-03-26	Faziabad	17.86	37.33	0
1988-03-27	Faziabad	20.41	34.87	0
1988-03-28	Faziabad	15.66	33.07	0
1988-03-29	Faziabad	16	35.04	0
1988-03-30	Faziabad	16.76	35.63	0
1988-03-31	Faziabad	16.34	36.85	0
1988-04-01	Faziabad	16.59	37.19	0
1988-04-02	Faziabad	16.56	38.11	0
1988-04-03	Faziabad	17.62	39.75	0
1988-04-04	Faziabad	18.63	41.19	0
1988-04-05	Faziabad	19.63	41.67	0
1988-04-06	Faziabad	20.4	41.14	0
1988-04-07	Faziabad	20.59	39.69	0
1988-04-08	Faziabad	19.43	38.88	0
1988-04-09	Faziabad	21.87	39.62	0
1988-04-10	Faziabad	21.16	40.56	0
1988-04-11	Faziabad	21.7	41.92	0
1988-04-12	Faziabad	22.38	42.22	0
1988-04-13	Faziabad	22.98	41.98	0
1988-04-14	Faziabad	22.5	41.46	0
1988-04-15	Faziabad	22.71	40.05	0
1988-04-16	Faziabad	24.19	37.3	0
1988-04-17	Faziabad	23.69	36.82	0
1988-04-18	Faziabad	21.71	35.3	5.4
1988-04-19	Faziabad	22.06	37.05	1.7
1988-04-20	Faziabad	20.63	35.49	24.3
1988-04-21	Faziabad	20.93	35.11	0
1988-04-22	Faziabad	22.16	38.36	0
1988-04-23	Faziabad	24.72	38.35	0
1988-04-24	Faziabad	21.6	35.95	7.2
1988-04-25	Faziabad	23.31	36.98	0
1988-04-26	Faziabad	20.77	36.85	0.7
1988-04-27	Faziabad	23.6	39.01	0
1988-04-28	Faziabad	25.75	37.97	0
1988-04-29	Faziabad	24.1	37.18	0.1
1988-04-30	Faziabad	23.87	38.53	0
1988-05-01	Faziabad	24.96	38.61	0
1988-05-02	Faziabad	23.45	35.86	16.8
1988-05-03	Faziabad	22.76	36.1	0
1988-05-04	Faziabad	22.33	36.37	0
1988-05-05	Faziabad	23.09	38.15	0
1988-05-06	Faziabad	22.88	38.39	0
1988-05-07	Faziabad	24.7	38.57	0
1988-05-08	Faziabad	25.62	39.23	2.5
1988-05-09	Faziabad	24.2	41.58	0.2
1988-05-10	Faziabad	24.92	42.73	0
1988-05-11	Faziabad	25.1	43.57	0
1988-05-12	Faziabad	24.84	42.32	0
1988-05-13	Faziabad	25.82	43.04	0
1988-05-14	Faziabad	25.08	37.55	0
1988-05-15	Faziabad	24.49	36.72	0
1988-05-16	Faziabad	25.49	36.93	0
1988-05-17	Faziabad	26.17	37.67	3.3
1988-05-18	Faziabad	22.57	36.64	11.3
1988-05-19	Faziabad	25.41	37.65	0
1988-05-20	Faziabad	26.55	38.83	11.3
1988-05-21	Faziabad	25.5	39.57	0
1988-05-22	Faziabad	27.4	41.16	0
1988-05-23	Faziabad	27.51	42.12	0
1988-05-24	Faziabad	26.85	41.82	3
1988-05-25	Faziabad	28.5	43.22	0
1988-05-26	Faziabad	28.43	44.05	0
1988-05-27	Faziabad	29.09	43.44	0
1988-05-28	Faziabad	29.36	42.79	0
1988-05-29	Faziabad	28.04	41.79	0
1988-05-30	Faziabad	27.51	40	0
1988-05-31	Faziabad	28.13	38.59	0
1988-06-01	Faziabad	24.48	37.47	5.6
1988-06-02	Faziabad	25.19	38.05	1.1
1988-06-03	Faziabad	26.57	39.54	0
1988-06-04	Faziabad	27.15	41.32	0
1988-06-05	Faziabad	24.83	40.46	0
1988-06-06	Faziabad	26.56	40.6	0
1988-06-07	Faziabad	27.2	41.28	0
1988-06-08	Faziabad	25.7	40.46	0
1988-06-09	Faziabad	28.15	39.89	0
1988-06-10	Faziabad	27.24	37.86	0
1988-06-11	Faziabad	27.63	37.81	0
1988-06-12	Faziabad	27.34	36.58	4.8
1988-06-13	Faziabad	26.48	35.8	1.8
1988-06-14	Faziabad	24.34	35.25	9
1988-06-15	Faziabad	24.89	36.25	2.6
1988-06-16	Faziabad	23.25	36.01	21.5
1988-06-17	Faziabad	25.44	36.16	0
1988-06-18	Faziabad	25	36.41	5.8
1988-06-19	Faziabad	26.08	36.92	0.4
1988-06-20	Faziabad	26.71	37.2	0
1988-06-21	Faziabad	26.63	35.89	5.9
1988-06-22	Faziabad	25.47	33.75	3.9
1988-06-23	Faziabad	26.1	34.37	4.5
1988-06-24	Faziabad	25.72	33.39	112.6
1988-06-25	Faziabad	26.46	36.1	19
1988-06-26	Faziabad	26.13	33.85	8.1
1988-06-27	Faziabad	27.05	35.14	11.7
1988-06-28	Faziabad	26.6	33.06	0.2
1988-06-29	Faziabad	25.78	33.41	0
1988-06-30	Faziabad	26.57	34.77	0
1988-07-01	Faziabad	27.83	36.15	3.7
1988-07-02	Faziabad	25.49	33.62	32.2
1988-07-03	Faziabad	25.66	33.28	0
1988-07-04	Faziabad	25.2	32.08	35.5
1988-07-05	Faziabad	24.88	28.8	89.5
1988-07-06	Faziabad	22.9	29.47	19.2
1988-07-07	Faziabad	24.44	32.45	27.2
1988-07-08	Faziabad	24.48	32.89	0.6
1988-07-09	Faziabad	25.31	33.26	9.8
1988-07-10	Faziabad	26.43	33	2.4
1988-07-11	Faziabad	26.26	33.1	0
1988-07-12	Faziabad	25.69	30.54	8.2
1988-07-13	Faziabad	24.84	30.53	10.1
1988-07-14	Faziabad	25.75	32.91	16
1988-07-15	Faziabad	24.99	32.49	3
1988-07-16	Faziabad	25.62	33.05	21.3
1988-07-17	Faziabad	26.48	34.43	0
1988-07-18	Faziabad	26.58	33.46	3
1988-07-19	Faziabad	26.64	33.37	0.8
1988-07-20	Faziabad	26.42	33.15	0
1988-07-21	Faziabad	26.3	33.24	27.2
1988-07-22	Faziabad	26.71	33.91	22
1988-07-23	Faziabad	26.88	34.37	1.3
1988-07-24	Faziabad	26.44	33.57	3.3
1988-07-25	Faziabad	25.78	31.36	18.5
1988-07-26	Faziabad	24.66	31.74	3.9
1988-07-27	Faziabad	25.79	32.16	14.8
1988-07-28	Faziabad	26.03	32.86	7
1988-07-29	Faziabad	26.3	34.03	2.5
1988-07-30	Faziabad	27.45	33.98	0
1988-07-31	Faziabad	26.17	31.88	20.7
1988-08-01	Faziabad	25.15	29.15	8.8
1988-08-02	Faziabad	24.46	32.19	52.6
1988-08-03	Faziabad	24.96	33.92	2.7
1988-08-04	Faziabad	25.83	32.94	6
1988-08-05	Faziabad	27.04	33.99	8.8
1988-08-06	Faziabad	26.95	34.09	0.8
1988-08-07	Faziabad	26.93	32.18	1.4
1988-08-08	Faziabad	26	32.85	14.1
1988-08-09	Faziabad	25.55	31.49	0
1988-08-10	Faziabad	25.11	30.42	18.3
1988-08-11	Faziabad	24.94	30.94	49.3
1988-08-12	Faziabad	24.85	30.45	11
1988-08-13	Faziabad	24.51	30.44	68
1988-08-14	Faziabad	24.95	30.69	26.7
1988-08-15	Faziabad	25.54	30.87	24.1
1988-08-16	Faziabad	25.48	31.43	38.6
1988-08-17	Faziabad	25.16	31.55	10.9
1988-08-18	Faziabad	25.47	33.08	13.2
1988-08-19	Faziabad	26.43	33.55	0
1988-08-20	Faziabad	26.39	34.07	0
1988-08-21	Faziabad	27.17	34.79	3.6
1988-08-22	Faziabad	26.34	33.81	2.2
1988-08-23	Faziabad	26.03	32.32	2.5
1988-08-24	Faziabad	25.95	31.56	4
1988-08-25	Faziabad	24.2	30.65	48.4
1988-08-26	Faziabad	24.99	31.32	85.2
1988-08-27	Faziabad	24.86	32.36	7.6
1988-08-28	Faziabad	25.89	33.83	16.2
1988-08-29	Faziabad	26.48	34.21	4.4
1988-08-30	Faziabad	25.83	33.16	0.2
1988-08-31	Faziabad	25.91	34.51	5.9
1988-09-01	Faziabad	26.02	34.8	0
1988-09-02	Faziabad	25.74	34.83	2.8
1988-09-03	Faziabad	26.39	34.89	0
1988-09-04	Faziabad	26.39	35.17	0
1988-09-05	Faziabad	25.87	35.35	0.4
1988-09-06	Faziabad	26.45	35.6	2.1
1988-09-07	Faziabad	23.88	32.11	93.9
1988-09-08	Faziabad	24.87	32.33	4.6
1988-09-09	Faziabad	23.91	34.05	19.9
1988-09-10	Faziabad	25.3	33.02	0.5
1988-09-11	Faziabad	25.42	34.54	0
1988-09-12	Faziabad	25.22	34.77	0
1988-09-13	Faziabad	25.68	35.11	0
1988-09-14	Faziabad	26.01	36.55	0
1988-09-15	Faziabad	26.93	36.01	0
1988-09-16	Faziabad	22.12	33.64	5.7
1988-09-17	Faziabad	23.17	30.73	6.8
1988-09-18	Faziabad	23.65	31.23	0.4
1988-09-19	Faziabad	24.45	32.38	0.2
1988-09-20	Faziabad	24.13	32.76	0
1988-09-21	Faziabad	24.81	33.46	0.3
1988-09-22	Faziabad	24.92	32.48	0
1988-09-23	Faziabad	24.87	32.11	1.6
1988-09-24	Faziabad	25.63	33.17	0
1988-09-25	Faziabad	25.63	35.17	0
1988-09-26	Faziabad	26.24	35.71	0
1988-09-27	Faziabad	26.25	35.91	0
1988-09-28	Faziabad	26.14	34.44	0
1988-09-29	Faziabad	23.75	34.34	0
1988-09-30	Faziabad	23.54	34.64	0
1988-10-01	Faziabad	24.36	33.94	0
1988-10-02	Faziabad	24.92	32.68	0
1988-10-03	Faziabad	25.01	33.92	0.2
1988-10-04	Faziabad	25.1	33.08	2.1
1988-10-05	Faziabad	23.51	32.02	3.8
1988-10-06	Faziabad	21.96	31.34	18.1
1988-10-07	Faziabad	18.93	31.86	0
1988-10-08	Faziabad	17.98	32.55	0
1988-10-09	Faziabad	19.04	32.55	0
1988-10-10	Faziabad	19.62	32.01	0
1988-10-11	Faziabad	18.71	32.14	0
1988-10-12	Faziabad	18.27	32.56	0
1988-10-13	Faziabad	18.48	33.16	0
1988-10-14	Faziabad	18.85	33.73	0
1988-10-15	Faziabad	18.63	32.87	0
1988-10-16	Faziabad	17.33	32.65	0
1988-10-17	Faziabad	16.93	32.71	0
1988-10-18	Faziabad	17.89	32.5	0
1988-10-19	Faziabad	17.77	32.68	0
1988-10-20	Faziabad	18.88	33.24	0
1988-10-21	Faziabad	19	33.46	0
1988-10-22	Faziabad	18.96	33.32	0
1988-10-23	Faziabad	18.05	32.93	0
1988-10-24	Faziabad	17.87	32.84	0
1988-10-25	Faziabad	17.73	32.84	0
1988-10-26	Faziabad	17.91	33.27	0
1988-10-27	Faziabad	18.22	32.51	0
1988-10-28	Faziabad	17.86	32.33	0
1988-10-29	Faziabad	17.67	32.56	0
1988-10-30	Faziabad	17.51	32.42	0
1988-10-31	Faziabad	17.66	32.12	0
1988-11-01	Faziabad	17.4	31.78	0
1988-11-02	Faziabad	16.44	31.91	0
1988-11-03	Faziabad	15.64	31.39	0
1988-11-04	Faziabad	15.41	30.89	0
1988-11-05	Faziabad	15	30.47	0
1988-11-06	Faziabad	15.05	30.14	0
1988-11-07	Faziabad	14.75	29.88	0
1988-11-08	Faziabad	14.58	29.89	0
1988-11-09	Faziabad	14.13	30.03	0
1988-11-10	Faziabad	13.96	30.6	0
1988-11-11	Faziabad	14.09	30.75	0
1988-11-12	Faziabad	14.27	31.29	0
1988-11-13	Faziabad	13.77	30.78	0
1988-11-14	Faziabad	13.64	30.19	0
1988-11-15	Faziabad	13.49	30.06	0
1988-11-16	Faziabad	13.48	29.82	0
1988-11-17	Faziabad	13.71	29.46	0
1988-11-18	Faziabad	14.51	29.39	0
1988-11-19	Faziabad	13.49	29.25	0
1988-11-20	Faziabad	13.35	28.78	0
1988-11-21	Faziabad	12.76	28.34	0
1988-11-22	Faziabad	12.24	28.98	0
1988-11-23	Faziabad	12.86	29.1	0
1988-11-24	Faziabad	12.43	28.43	0
1988-11-25	Faziabad	12.34	28.62	0
1988-11-26	Faziabad	12.32	28.05	0
1988-11-27	Faziabad	10.7	26.97	0
1988-11-28	Faziabad	10.51	26.38	0
1988-11-29	Faziabad	9.53	25.83	0
1988-11-30	Faziabad	10.7	27.2	0
1988-12-01	Faziabad	11.4	27.43	0
1988-12-02	Faziabad	10.64	27.05	0
1988-12-03	Faziabad	10.55	26.78	0
1988-12-04	Faziabad	10.78	26.89	0
1988-12-05	Faziabad	10.41	26.58	0
1988-12-06	Faziabad	10.86	25.94	0
1988-12-07	Faziabad	10.85	25.84	0
1988-12-08	Faziabad	9.29	25.82	0
1988-12-09	Faziabad	9.34	26.27	0
1988-12-10	Faziabad	9.23	26.24	0
1988-12-11	Faziabad	8.91	26.06	0
1988-12-12	Faziabad	10.11	25.55	0
1988-12-13	Faziabad	11.07	24.25	0
1988-12-14	Faziabad	10.62	25.87	0
1988-12-15	Faziabad	9.28	25.86	0
1988-12-16	Faziabad	9.66	26.4	0
1988-12-17	Faziabad	9.7	25.75	0
1988-12-18	Faziabad	10.62	25.41	0
1988-12-19	Faziabad	9.91	25.88	0
1988-12-20	Faziabad	10.81	25.84	0
1988-12-21	Faziabad	10.69	26.32	0
1988-12-22	Faziabad	11.2	26.43	0
1988-12-23	Faziabad	13.09	27.47	0
1988-12-24	Faziabad	13.06	26.9	0
1988-12-25	Faziabad	14.62	24.87	1.3
1988-12-26	Faziabad	14.11	21.93	21.3
1988-12-27	Faziabad	11.6	21.56	1.5
1988-12-28	Faziabad	8.86	21.93	0
1988-12-29	Faziabad	7.76	22.46	0
1988-12-30	Faziabad	8.07	23.09	0
1988-12-31	Faziabad	7.97	23.4	0
1989-01-01	Faziabad	8.13	23.78	0
1989-01-02	Faziabad	10.05	24.16	0
1989-01-03	Faziabad	12.54	23.96	0.7
1989-01-04	Faziabad	9.69	23.32	0
1989-01-05	Faziabad	10.28	23.87	0
1989-01-06	Faziabad	10.54	24.6	0
1989-01-07	Faziabad	12.65	22.61	0.1
1989-01-08	Faziabad	12.87	21.29	4.9
1989-01-09	Faziabad	9.97	20.6	3.8
1989-01-10	Faziabad	7.61	19.76	0
1989-01-11	Faziabad	5.45	18.9	0
1989-01-12	Faziabad	5.1	19.17	0
1989-01-13	Faziabad	4.61	19.93	0
1989-01-14	Faziabad	4.38	20.76	0
1989-01-15	Faziabad	5.99	20.89	0
1989-01-16	Faziabad	5.58	21.39	0
1989-01-17	Faziabad	6.77	21.72	0
1989-01-18	Faziabad	5.44	21.34	0
1989-01-19	Faziabad	5.41	21.89	0
1989-01-20	Faziabad	6.56	22.31	0
1989-01-21	Faziabad	7.54	21.85	0
1989-01-22	Faziabad	5.97	21.66	0
1989-01-23	Faziabad	6.91	21.64	0
1989-01-24	Faziabad	6.03	21.99	0
1989-01-25	Faziabad	5.82	22.66	0
1989-01-26	Faziabad	5.73	23.72	0
1989-01-27	Faziabad	7.07	24.48	0
1989-01-28	Faziabad	8.26	24.5	0
1989-01-29	Faziabad	7.19	24.18	0
1989-01-30	Faziabad	6.76	24.07	0
1989-01-31	Faziabad	7.59	25.6	0
1989-02-01	Faziabad	8.04	26.94	0
1989-02-02	Faziabad	10.63	26.97	0
1989-02-03	Faziabad	9.65	26.25	0
1989-02-04	Faziabad	9.94	26.28	0
1989-02-05	Faziabad	12.36	27.64	0
1989-02-06	Faziabad	14.11	27.93	0.2
1989-02-07	Faziabad	11.54	26.69	0
1989-02-08	Faziabad	9.61	25.4	0
1989-02-09	Faziabad	8.72	24.68	0
1989-02-10	Faziabad	7.86	24.07	0
1989-02-11	Faziabad	8.26	23.51	0
1989-02-12	Faziabad	6.61	23.38	0
1989-02-13	Faziabad	9.31	24.19	0
1989-02-14	Faziabad	11.69	26.44	0
1989-02-15	Faziabad	11.47	26.53	0
1989-02-16	Faziabad	11.46	26.31	0
1989-02-17	Faziabad	10.47	27.7	0
1989-02-18	Faziabad	12.52	25.84	0
1989-02-19	Faziabad	10.15	22.53	15
1989-02-20	Faziabad	7.19	22.49	0
1989-02-21	Faziabad	7.47	24.5	0
1989-02-22	Faziabad	9.2	25.47	0
1989-02-23	Faziabad	7.95	25.42	0
1989-02-24	Faziabad	8.36	25.94	0
1989-02-25	Faziabad	9.94	28.1	0
1989-02-26	Faziabad	11.59	30.57	0
1989-02-27	Faziabad	12.48	32.49	0
1989-02-28	Faziabad	13.67	33.03	0
1989-03-01	Faziabad	13.45	32.33	0
1989-03-02	Faziabad	13.28	31.3	0
1989-03-03	Faziabad	10.85	29.39	0
1989-03-04	Faziabad	10.35	29.1	0
1989-03-05	Faziabad	10.98	30	0
1989-03-06	Faziabad	11.47	31.54	0
1989-03-07	Faziabad	12.7	31.74	0
1989-03-08	Faziabad	14.48	31.93	0
1989-03-09	Faziabad	16.06	31.31	0
1989-03-10	Faziabad	15.72	31.23	0
1989-03-11	Faziabad	15.74	30.53	0
1989-03-12	Faziabad	12.77	29.13	5.8
1989-03-13	Faziabad	13.78	30.3	0
1989-03-14	Faziabad	14.8	29.74	0
1989-03-15	Faziabad	13.92	29.68	0
1989-03-16	Faziabad	14.92	30.89	0
1989-03-17	Faziabad	13.81	31.39	0
1989-03-18	Faziabad	15.41	32.69	0
1989-03-19	Faziabad	15.86	33.8	0
1989-03-20	Faziabad	16.34	34.4	0
1989-03-21	Faziabad	16.81	34.96	0
1989-03-22	Faziabad	17.6	36.07	0
1989-03-23	Faziabad	18.52	35.38	0
1989-03-24	Faziabad	16.51	34.38	0
1989-03-25	Faziabad	16.92	34.98	0
1989-03-26	Faziabad	18.95	34.96	0
1989-03-27	Faziabad	19.63	32.03	0
1989-03-28	Faziabad	16.78	28.72	0
1989-03-29	Faziabad	15.15	29.76	0
1989-03-30	Faziabad	14.96	30.99	0
1989-03-31	Faziabad	15.85	33.02	0
1989-04-01	Faziabad	18.4	35.5	0
1989-04-02	Faziabad	20.4	35.59	0
1989-04-03	Faziabad	14.98	34.23	0
1989-04-04	Faziabad	14.69	34.12	0
1989-04-05	Faziabad	16.12	34.82	0
1989-04-06	Faziabad	16.81	34.24	0
1989-04-07	Faziabad	16.5	35.22	0
1989-04-08	Faziabad	18.44	36.72	0
1989-04-09	Faziabad	18.17	38.91	0
1989-04-10	Faziabad	20.6	38.6	0
1989-04-11	Faziabad	19.96	37.09	0
1989-04-12	Faziabad	17.87	36.64	0
1989-04-13	Faziabad	17.3	37.73	0
1989-04-14	Faziabad	17.8	38.11	0
1989-04-15	Faziabad	18.85	39.02	0
1989-04-16	Faziabad	20.68	40.37	0
1989-04-17	Faziabad	20.86	40.78	0
1989-04-18	Faziabad	20.77	40.92	0
1989-04-19	Faziabad	21.23	41.24	0
1989-04-20	Faziabad	21.92	40.95	0
1989-04-21	Faziabad	19.8	40.36	0
1989-04-22	Faziabad	21.54	41.29	0
1989-04-23	Faziabad	23.14	41.24	0
1989-04-24	Faziabad	23.02	41.44	0
1989-04-25	Faziabad	25.42	41.1	0
1989-04-26	Faziabad	23.32	40.01	0
1989-04-27	Faziabad	22.97	37.98	0
1989-04-28	Faziabad	21.63	37.86	0
1989-04-29	Faziabad	21.95	38.59	0
1989-04-30	Faziabad	19.84	39.9	0
1989-05-01	Faziabad	23.69	39.34	0
1989-05-02	Faziabad	24.45	40.42	0
1989-05-03	Faziabad	25.74	40.69	0
1989-05-04	Faziabad	27.3	41.07	0
1989-05-05	Faziabad	25.33	40.79	0
1989-05-06	Faziabad	24.27	41.13	0
1989-05-07	Faziabad	23.36	40.73	0
1989-05-08	Faziabad	21.32	40.16	0
1989-05-09	Faziabad	21.24	39.57	0
1989-05-10	Faziabad	23.04	41.21	0
1989-05-11	Faziabad	23.99	41.61	0
1989-05-12	Faziabad	25.51	41.56	0
1989-05-13	Faziabad	26.03	41.33	0
1989-05-14	Faziabad	23.56	39.72	0
1989-05-15	Faziabad	23.53	39.68	0
1989-05-16	Faziabad	26.05	39.65	0
1989-05-17	Faziabad	26.7	39.74	0
1989-05-18	Faziabad	26.78	38.79	0
1989-05-19	Faziabad	27.21	40.05	0
1989-05-20	Faziabad	25.77	41.41	0
1989-05-21	Faziabad	23.79	41.39	0
1989-05-22	Faziabad	25.82	41.17	0
1989-05-23	Faziabad	27.28	41.31	0
1989-05-24	Faziabad	27.87	40.7	0
1989-05-25	Faziabad	26.15	40.37	19.8
1989-05-26	Faziabad	25.23	37.73	0
1989-05-27	Faziabad	24.3	36.35	0
1989-05-28	Faziabad	24.6	39.09	0
1989-05-29	Faziabad	26.14	38.24	0
1989-05-30	Faziabad	25.84	37.91	0
1989-05-31	Faziabad	25.33	38.78	0
1989-06-01	Faziabad	24.22	38.47	22.6
1989-06-02	Faziabad	27.04	39.35	0
1989-06-03	Faziabad	28.31	40.83	3.1
1989-06-04	Faziabad	26.4	38.16	0
1989-06-05	Faziabad	24.71	36.1	10.6
1989-06-06	Faziabad	25.08	36.38	1.2
1989-06-07	Faziabad	23.89	37.63	0
1989-06-08	Faziabad	25.66	39.91	0
1989-06-09	Faziabad	28.43	41.51	0
1989-06-10	Faziabad	28.97	41.36	0
1989-06-11	Faziabad	28.88	39.96	0
1989-06-12	Faziabad	27.19	39.58	1.1
1989-06-13	Faziabad	26.77	38.72	35.6
1989-06-14	Faziabad	25.23	35.85	2.5
1989-06-15	Faziabad	27.01	36.98	0
1989-06-16	Faziabad	26.13	36.89	0
1989-06-17	Faziabad	24.97	35.07	0.4
1989-06-18	Faziabad	25.02	34.41	103.1
1989-06-19	Faziabad	25.46	34.75	46.8
1989-06-20	Faziabad	25.99	35.35	0
1989-06-21	Faziabad	25.31	35.44	21.1
[truncated: 8,959 more rows]

## Sheet: Hisar
Day	Center	Min. Temperature	Max. Temperature	Rainfall
1984-01-01	Hisar	3.47	20.97	0
1984-01-02	Hisar	3.03	21.05	0
1984-01-03	Hisar	2.53	20.47	0
1984-01-04	Hisar	3.15	21.76	0
1984-01-05	Hisar	3.06	21.54	0
1984-01-06	Hisar	4.73	19.98	0
1984-01-07	Hisar	2.45	18.33	0
1984-01-08	Hisar	2.31	18.45	0
1984-01-09	Hisar	2.17	19.3	0
1984-01-10	Hisar	3.31	17.99	0
1984-01-11	Hisar	2.77	18.78	0
1984-01-12	Hisar	4.06	20.95	0
1984-01-13	Hisar	5.94	22.78	0
1984-01-14	Hisar	4.18	21.9	0
1984-01-15	Hisar	3.09	20.43	0
1984-01-16	Hisar	4.64	20.87	0
1984-01-17	Hisar	3.07	19.08	0
1984-01-18	Hisar	5.05	19.96	0
1984-01-19	Hisar	6.23	21.39	0
1984-01-20	Hisar	4.54	21.27	0
1984-01-21	Hisar	2.06	20.59	0
1984-01-22	Hisar	4.22	20.19	0
1984-01-23	Hisar	3.41	19.32	0
1984-01-24	Hisar	3.15	19.71	0
1984-01-25	Hisar	2.89	18.85	0
1984-01-26	Hisar	2.37	19.63	0
1984-01-27	Hisar	2.49	19.65	0
1984-01-28	Hisar	2.4	20.32	0
1984-01-29	Hisar	1.96	20.62	0
1984-01-30	Hisar	1.98	21.03	0
1984-01-31	Hisar	2.19	22.19	0
1984-02-01	Hisar	6.84	22.98	0
1984-02-02	Hisar	6.48	24.52	0
1984-02-03	Hisar	8.28	25.48	0
1984-02-04	Hisar	5.94	22.66	0
1984-02-05	Hisar	3.63	21.53	0
1984-02-06	Hisar	2.24	19.38	0
1984-02-07	Hisar	4.54	21.32	0
1984-02-08	Hisar	4.62	22.3	0
1984-02-09	Hisar	4.49	21.28	0
1984-02-10	Hisar	5.84	21.74	0
1984-02-11	Hisar	6.03	23.19	0
1984-02-12	Hisar	6.75	23.49	0
1984-02-13	Hisar	5.74	23.28	0
1984-02-14	Hisar	4.44	23.65	0
1984-02-15	Hisar	7.41	23.82	0
1984-02-16	Hisar	9.1	23.5	0
1984-02-17	Hisar	10.04	24.37	0
1984-02-18	Hisar	11.51	24.56	0
1984-02-19	Hisar	11.56	22.39	0
1984-02-20	Hisar	8.05	20.05	10.2
1984-02-21	Hisar	3.79	17.58	0
1984-02-22	Hisar	3.32	16.52	0
1984-02-23	Hisar	3.05	17.03	0
1984-02-24	Hisar	2.31	17.51	0
1984-02-25	Hisar	3.07	18.04	0
1984-02-26	Hisar	4.5	20.24	0
1984-02-27	Hisar	5.91	22.11	0
1984-02-28	Hisar	7.36	23.79	0
1984-02-29	Hisar	8.35	24.92	0
1984-03-01	Hisar	9.49	25.21	0
1984-03-02	Hisar	9.41	26.95	0
1984-03-03	Hisar	9.01	26.29	0
1984-03-04	Hisar	9.92	27.75	0
1984-03-05	Hisar	9.74	27.58	0
1984-03-06	Hisar	10.36	27.94	0
1984-03-07	Hisar	11.1	28.75	0
1984-03-08	Hisar	11.77	29.68	0
1984-03-09	Hisar	11.39	29.97	0
1984-03-10	Hisar	11.86	28.59	0
1984-03-11	Hisar	15.21	30.83	0
1984-03-12	Hisar	13.92	30.44	0
1984-03-13	Hisar	14.75	31.6	0
1984-03-14	Hisar	13.26	31.87	0
1984-03-15	Hisar	15	32.46	0
1984-03-16	Hisar	17.64	33.06	0
1984-03-17	Hisar	17.11	31.4	0
1984-03-18	Hisar	16.08	31.24	0
1984-03-19	Hisar	12.45	30.39	0
1984-03-20	Hisar	11.79	27.18	0
1984-03-21	Hisar	12.71	28.8	0
1984-03-22	Hisar	13.8	31.03	0
1984-03-23	Hisar	15.8	33.05	0
1984-03-24	Hisar	17.47	33.92	0
1984-03-25	Hisar	18.99	35.06	0
1984-03-26	Hisar	17.89	33.84	0
1984-03-27	Hisar	16.11	31.87	0
1984-03-28	Hisar	17.4	32.39	0
1984-03-29	Hisar	19.4	34.4	0
1984-03-30	Hisar	19.63	35.98	0
1984-03-31	Hisar	20.47	36.08	0
1984-04-01	Hisar	19.66	34.73	0
1984-04-02	Hisar	18.41	35.47	0
1984-04-03	Hisar	16.87	34.03	0
1984-04-04	Hisar	16.31	34.27	0
1984-04-05	Hisar	14.97	33.96	0
1984-04-06	Hisar	16.84	33.45	0
1984-04-07	Hisar	15.99	34.56	0
1984-04-08	Hisar	16.63	34.8	0
1984-04-09	Hisar	17.26	32.49	0
1984-04-10	Hisar	14.08	31.49	0
1984-04-11	Hisar	14.69	32.42	0
1984-04-12	Hisar	17.16	34.09	0
1984-04-13	Hisar	19.46	36.09	0
1984-04-14	Hisar	21.03	38.03	0
1984-04-15	Hisar	20.77	39.82	0
1984-04-16	Hisar	22.07	40.94	0
1984-04-17	Hisar	20.97	40.07	0.3
1984-04-18	Hisar	20.3	35.77	0
1984-04-19	Hisar	20.98	38.01	0
1984-04-20	Hisar	21.68	39.06	0
1984-04-21	Hisar	19.15	35.81	0
1984-04-22	Hisar	17.54	34.06	0
1984-04-23	Hisar	17.44	33.51	0
1984-04-24	Hisar	19.08	34.34	0
1984-04-25	Hisar	20.15	37.03	0
1984-04-26	Hisar	21.85	38.84	0
1984-04-27	Hisar	23.73	40.42	1
1984-04-28	Hisar	23.54	41.37	0.9
1984-04-29	Hisar	20.42	39.17	0
1984-04-30	Hisar	20.72	39.07	0
1984-05-01	Hisar	19.16	39.04	0
1984-05-02	Hisar	20.52	39.69	0
1984-05-03	Hisar	22.34	40.39	0
1984-05-04	Hisar	22.13	40.89	0
1984-05-05	Hisar	22.59	40.84	0
1984-05-06	Hisar	23.21	42.34	0
1984-05-07	Hisar	24.73	43.09	0
1984-05-08	Hisar	25.64	43.51	0
1984-05-09	Hisar	26.38	42.17	0
1984-05-10	Hisar	25.42	42.07	0
1984-05-11	Hisar	25.39	42.79	0
1984-05-12	Hisar	25.55	41.2	0
1984-05-13	Hisar	24.08	41.65	0
1984-05-14	Hisar	25.04	42.31	1.2
1984-05-15	Hisar	25.75	42.17	0
1984-05-16	Hisar	24.76	42.72	0
1984-05-17	Hisar	22.09	42.26	0
1984-05-18	Hisar	22.63	42.39	0
1984-05-19	Hisar	23.03	42.87	0
1984-05-20	Hisar	25.47	43.7	0
1984-05-21	Hisar	25.32	43.28	0
1984-05-22	Hisar	24.11	43.53	0
1984-05-23	Hisar	24.2	43.95	0
1984-05-24	Hisar	25.88	44.81	0
1984-05-25	Hisar	27	45.62	0
1984-05-26	Hisar	27.57	46.26	0
1984-05-27	Hisar	29.38	45.21	0
1984-05-28	Hisar	29.74	44.55	0
1984-05-29	Hisar	27.76	44.55	0
1984-05-30	Hisar	26.49	44.69	0
1984-05-31	Hisar	29.09	43.92	0
1984-06-01	Hisar	29.83	43.83	0
1984-06-02	Hisar	28.74	43.8	0
1984-06-03	Hisar	28.96	43.72	0
1984-06-04	Hisar	29.21	44.06	0
1984-06-05	Hisar	28.28	44.16	0
1984-06-06	Hisar	29.11	42.52	0
1984-06-07	Hisar	30.19	42.42	0
1984-06-08	Hisar	29.54	43.17	0
1984-06-09	Hisar	29.82	42.27	0
1984-06-10	Hisar	29.29	40.98	0
1984-06-11	Hisar	28.08	41.24	9.9
1984-06-12	Hisar	23.07	36.51	0.8
1984-06-13	Hisar	23.64	35.66	2.1
1984-06-14	Hisar	26.48	37.3	0
1984-06-15	Hisar	27.57	38.28	0
1984-06-16	Hisar	28.75	39.14	0.3
1984-06-17	Hisar	30.13	40.95	0
1984-06-18	Hisar	28.56	41.59	0.2
1984-06-19	Hisar	26.33	37.34	0
1984-06-20	Hisar	25.22	34.37	0
1984-06-21	Hisar	27.09	35.16	0
1984-06-22	Hisar	27.84	38.51	0
1984-06-23	Hisar	28.17	39.99	0
1984-06-24	Hisar	29.46	39.64	0
1984-06-25	Hisar	29.4	39.44	0
1984-06-26	Hisar	29.63	37.42	0
1984-06-27	Hisar	29.46	37.64	0
1984-06-28	Hisar	28.51	38.18	0
1984-06-29	Hisar	28.66	38.42	0
1984-06-30	Hisar	26.91	38.44	0
1984-07-01	Hisar	25.63	34.31	2.4
1984-07-02	Hisar	25.61	34.14	0.8
1984-07-03	Hisar	25.04	33.71	0
1984-07-04	Hisar	26.05	35.33	0
1984-07-05	Hisar	26.86	37.75	0
1984-07-06	Hisar	26.05	37.44	0
1984-07-07	Hisar	25.79	35.42	0.3
1984-07-08	Hisar	25.44	35.55	0.4
1984-07-09	Hisar	23.07	34.58	29.1
1984-07-10	Hisar	24.73	33.01	0
1984-07-11	Hisar	24.09	35.97	18.2
1984-07-12	Hisar	24.33	34.62	0.6
1984-07-13	Hisar	24.35	33.85	4
1984-07-14	Hisar	25.01	34.39	3.9
1984-07-15	Hisar	25.62	35.22	9
1984-07-16	Hisar	25.56	35.85	2.8
1984-07-17	Hisar	25.15	36.25	1.7
1984-07-18	Hisar	25.69	34.64	0.5
1984-07-19	Hisar	25.04	35.73	0
1984-07-20	Hisar	25.22	33.41	0
1984-07-21	Hisar	25.73	35.16	0
1984-07-22	Hisar	25.29	34.47	3.3
1984-07-23	Hisar	25.32	34.55	0.5
1984-07-24	Hisar	26.34	34.61	0.7
1984-07-25	Hisar	27.03	35.8	0
1984-07-26	Hisar	27.4	36.56	0
1984-07-27	Hisar	27.32	36.92	0
1984-07-28	Hisar	26.74	36.82	0
1984-07-29	Hisar	26.67	33.14	0
1984-07-30	Hisar	26.63	34.22	0
1984-07-31	Hisar	25.96	35.91	0
1984-08-01	Hisar	25.03	34.48	37.8
1984-08-02	Hisar	25.1	34.5	0
1984-08-03	Hisar	26.41	35.23	0
1984-08-04	Hisar	27	36.12	0
1984-08-05	Hisar	25.9	34.05	0
1984-08-06	Hisar	25.81	34.89	0
1984-08-07	Hisar	26.95	35.48	0
1984-08-08	Hisar	27.33	36.08	0
1984-08-09	Hisar	25.66	34.19	0
1984-08-10	Hisar	26.95	37.1	0
1984-08-11	Hisar	26.62	36.68	0
1984-08-12	Hisar	26.05	34.77	0
1984-08-13	Hisar	26.53	35.53	0
1984-08-14	Hisar	27.2	35.1	0
1984-08-15	Hisar	26.64	36.95	0.2
1984-08-16	Hisar	24.39	33.1	3.1
1984-08-17	Hisar	26.39	35	3.5
1984-08-18	Hisar	25.85	34.73	0.2
1984-08-19	Hisar	25.18	32.75	6.3
1984-08-20	Hisar	25.72	33.78	0.6
1984-08-21	Hisar	26.21	34.85	1.6
1984-08-22	Hisar	24.77	34.27	9.9
1984-08-23	Hisar	24.89	34.48	0
1984-08-24	Hisar	24.69	33.51	0.3
1984-08-25	Hisar	24.61	33.48	44.7
1984-08-26	Hisar	24.42	30.85	46.3
1984-08-27	Hisar	24.78	32.2	3.2
1984-08-28	Hisar	24.33	31.57	1
1984-08-29	Hisar	24.19	32.63	46.8
1984-08-30	Hisar	25.01	33.36	10.4
1984-08-31	Hisar	25.6	34.05	0
1984-09-01	Hisar	24.22	33.53	3.1
1984-09-02	Hisar	24.18	30.8	0.5
1984-09-03	Hisar	23.99	30.69	18.6
1984-09-04	Hisar	23.99	30.97	0.8
1984-09-05	Hisar	24.72	32.74	0
1984-09-06	Hisar	24.58	32.72	0
1984-09-07	Hisar	23.32	33.1	7.8
1984-09-08	Hisar	23.34	32.1	0
1984-09-09	Hisar	22.77	33.03	0
1984-09-10	Hisar	22.59	32.91	0
1984-09-11	Hisar	23.09	34.18	0
1984-09-12	Hisar	24.62	33.08	0
1984-09-13	Hisar	23.47	33.41	12.7
1984-09-14	Hisar	23.46	33.04	0.6
1984-09-15	Hisar	24.03	33.8	0.2
1984-09-16	Hisar	23.76	34.43	0
1984-09-17	Hisar	23.54	34.2	19.4
1984-09-18	Hisar	22.28	33.21	0
1984-09-19	Hisar	21.75	31.5	0
1984-09-20	Hisar	20.6	33.23	0
1984-09-21	Hisar	22.13	32.87	0
1984-09-22	Hisar	20.84	33.12	0
1984-09-23	Hisar	20.24	33.29	0
1984-09-24	Hisar	19.59	33.91	0
1984-09-25	Hisar	19.1	33.57	0
1984-09-26	Hisar	19.16	34.31	0
1984-09-27	Hisar	19.12	33.48	0
1984-09-28	Hisar	19.04	33.96	0
1984-09-29	Hisar	18.4	34.09	0
1984-09-30	Hisar	18.15	33.88	0
1984-10-01	Hisar	17.56	34.01	0
1984-10-02	Hisar	17.56	35.08	0
1984-10-03	Hisar	17.71	33.52	6
1984-10-04	Hisar	16.76	33.6	0
1984-10-05	Hisar	16.65	33.45	0
1984-10-06	Hisar	16.01	33.6	0
1984-10-07	Hisar	15.73	34.07	0
1984-10-08	Hisar	15.59	33.91	0
1984-10-09	Hisar	14.81	34.01	0
1984-10-10	Hisar	14.48	34.89	0
1984-10-11	Hisar	15.7	34.54	0
1984-10-12	Hisar	13.98	33.2	0
1984-10-13	Hisar	14.13	33.2	0
1984-10-14	Hisar	13.5	33.07	0
1984-10-15	Hisar	14.15	33.4	0
1984-10-16	Hisar	14.26	33.07	0
1984-10-17	Hisar	15.5	33.12	0
1984-10-18	Hisar	14.5	32.96	0
1984-10-19	Hisar	14.42	33.06	0
1984-10-20	Hisar	15.16	34.2	0
1984-10-21	Hisar	14.67	34.43	0
1984-10-22	Hisar	13.92	34.19	0
1984-10-23	Hisar	15.15	34.08	0
1984-10-24	Hisar	17.24	33.73	0
1984-10-25	Hisar	15.34	33.21	0
1984-10-26	Hisar	15.21	32.1	0
1984-10-27	Hisar	14.51	31.83	0
1984-10-28	Hisar	13.79	31.7	0
1984-10-29	Hisar	13.13	31.24	0
1984-10-30	Hisar	11.4	30.94	0
1984-10-31	Hisar	11.49	30.55	0
1984-11-01	Hisar	10.37	29.63	0
1984-11-02	Hisar	9.57	29.43	0
1984-11-03	Hisar	9.59	29.86	0
1984-11-04	Hisar	9.7	29.59	0
1984-11-05	Hisar	9.76	29.06	0
1984-11-06	Hisar	10.13	29.24	0
1984-11-07	Hisar	11.43	29.02	0
1984-11-08	Hisar	11.3	29.88	0
1984-11-09	Hisar	12.28	30	0
1984-11-10	Hisar	10.81	29.15	0
1984-11-11	Hisar	10.07	28.11	0
1984-11-12	Hisar	9.59	27.95	0
1984-11-13	Hisar	9.08	27.85	0
1984-11-14	Hisar	9.72	29.19	0
1984-11-15	Hisar	10.14	28.95	0
1984-11-16	Hisar	9.27	28.69	0
1984-11-17	Hisar	10.22	29.53	0
1984-11-18	Hisar	10.43	30.03	0
1984-11-19	Hisar	9.63	29.39	0
1984-11-20	Hisar	9.6	28.31	0
1984-11-21	Hisar	10.14	28.47	0
1984-11-22	Hisar	12.18	28.96	0
1984-11-23	Hisar	11.96	26.71	0
1984-11-24	Hisar	9	27.33	0
1984-11-25	Hisar	6.65	25.9	0
1984-11-26	Hisar	6.24	24.87	0
1984-11-27	Hisar	5.94	25.18	0
1984-11-28	Hisar	6.01	25.99	0
1984-11-29	Hisar	6.4	26.59	0
1984-11-30	Hisar	6.93	26.83	0
1984-12-01	Hisar	7	26.79	0
1984-12-02	Hisar	6.6	26.33	0
1984-12-03	Hisar	7.02	25.91	0
1984-12-04	Hisar	7.01	25.33	0
1984-12-05	Hisar	7.56	26.02	0
1984-12-06	Hisar	6.43	25.9	0
1984-12-07	Hisar	6.52	25.59	0
1984-12-08	Hisar	6.51	25.48	0
1984-12-09	Hisar	8.56	26.32	0
1984-12-10	Hisar	10	26.64	0
1984-12-11	Hisar	9.93	26.11	0
1984-12-12	Hisar	9.7	24.67	0
1984-12-13	Hisar	10.77	26.32	0
1984-12-14	Hisar	6.02	21.71	0
1984-12-15	Hisar	5.17	23.28	0
1984-12-16	Hisar	5.44	24.38	0
1984-12-17	Hisar	5.78	24.22	0
1984-12-18	Hisar	3.49	23.93	0
1984-12-19	Hisar	3.23	22.32	0
1984-12-20	Hisar	1.41	22.91	0
1984-12-21	Hisar	3.75	21.88	0
1984-12-22	Hisar	2.09	22.41	0
1984-12-23	Hisar	2.11	22.41	0
1984-12-24	Hisar	3.55	21.91	0
1984-12-25	Hisar	3.09	21.53	0
1984-12-26	Hisar	3.11	20.13	0
1984-12-27	Hisar	2.65	20.38	0
1984-12-28	Hisar	3.44	20.15	0
1984-12-29	Hisar	1.94	21.01	0
1984-12-30	Hisar	5.52	17.34	0
1984-12-31	Hisar	7.07	16.2	0
1985-01-01	Hisar	7.09	18.1	0
1985-01-02	Hisar	3.32	16.08	0
1985-01-03	Hisar	5.35	17.08	0
1985-01-04	Hisar	6.48	18.51	0
1985-01-05	Hisar	7.69	15.26	0.2
1985-01-06	Hisar	6.11	18.5	0
1985-01-07	Hisar	6.55	18.26	1.5
1985-01-08	Hisar	6.24	16.24	1.7
1985-01-09	Hisar	5.41	18.64	0
1985-01-10	Hisar	3.98	19.36	0
1985-01-11	Hisar	4.64	20.28	0
1985-01-12	Hisar	4.4	20.1	0
1985-01-13	Hisar	3.14	20.76	0
1985-01-14	Hisar	3.55	21.34	0
1985-01-15	Hisar	5.34	21.68	0
1985-01-16	Hisar	3.87	20.36	0
1985-01-17	Hisar	3.99	21.27	0
1985-01-18	Hisar	6.62	22.33	0
1985-01-19	Hisar	10.42	21.76	0
1985-01-20	Hisar	6.2	22.12	0.4
1985-01-21	Hisar	9.62	21.59	0
1985-01-22	Hisar	6.13	19.65	0
1985-01-23	Hisar	5.78	21.51	0
1985-01-24	Hisar	4.88	21.67	0
1985-01-25	Hisar	4.58	22.23	0
1985-01-26	Hisar	7.42	23.32	0
1985-01-27	Hisar	6.82	22.21	0
1985-01-28	Hisar	5.65	21.74	0
1985-01-29	Hisar	5.22	21.99	0
1985-01-30	Hisar	5.18	23.3	0
1985-01-31	Hisar	5.53	23.23	0
1985-02-01	Hisar	4.75	23.43	0
1985-02-02	Hisar	5.38	23.04	0
1985-02-03	Hisar	7.59	23.68	0
1985-02-04	Hisar	10.36	25.35	0
1985-02-05	Hisar	9.37	23.89	0
1985-02-06	Hisar	5.76	22.59	0
1985-02-07	Hisar	5.37	23.1	0
1985-02-08	Hisar	6.06	25.19	0
1985-02-09	Hisar	6.75	25.79	0
1985-02-10	Hisar	5.09	24.81	0
1985-02-11	Hisar	4.47	24.12	0
1985-02-12	Hisar	4.92	23.78	0
1985-02-13	Hisar	4.26	24.85	0
1985-02-14	Hisar	5.75	25.59	0
1985-02-15	Hisar	5.95	25.39	0
1985-02-16	Hisar	6.6	25.7	0
1985-02-17	Hisar	6.78	26.13	0
1985-02-18	Hisar	6.85	28.02	0
1985-02-19	Hisar	8.37	29.06	0
1985-02-20	Hisar	10.15	28.46	0
1985-02-21	Hisar	7.61	24.47	0
1985-02-22	Hisar	8.25	25.13	0
1985-02-23	Hisar	7.21	25.99	0
1985-02-24	Hisar	8.28	28.43	0
1985-02-25	Hisar	9.19	29.34	0
1985-02-26	Hisar	9.43	27.91	0
1985-02-27	Hisar	10.15	28.98	0
1985-02-28	Hisar	12.3	32.03	0
1985-03-01	Hisar	11.51	31.18	0
1985-03-02	Hisar	13.32	31.78	0
1985-03-03	Hisar	13.31	31.86	0
1985-03-04	Hisar	13.14	32.16	0
1985-03-05	Hisar	14.14	33.6	0
1985-03-06	Hisar	14.66	33.39	0
1985-03-07	Hisar	13.89	33.69	0
1985-03-08	Hisar	12.34	32.37	0
1985-03-09	Hisar	13.44	30.92	0
1985-03-10	Hisar	13.64	31.97	0
1985-03-11	Hisar	12.96	30.71	0
1985-03-12	Hisar	15.19	32.85	0
1985-03-13	Hisar	12.46	32.75	0
1985-03-14	Hisar	11.66	31.11	0
1985-03-15	Hisar	10.37	30.32	0
1985-03-16	Hisar	14	31.5	0
1985-03-17	Hisar	13.86	33.37	0
1985-03-18	Hisar	16.35	33.35	0
1985-03-19	Hisar	14	28.68	0
1985-03-20	Hisar	13.39	30.09	0
1985-03-21	Hisar	13.22	31.34	0
1985-03-22	Hisar	15.15	33.83	0
1985-03-23	Hisar	19.84	35.24	0
1985-03-24	Hisar	18.74	32.15	0
1985-03-25	Hisar	16.95	33.77	0
1985-03-26	Hisar	18.29	34.65	0
1985-03-27	Hisar	20.95	36.27	0
1985-03-28	Hisar	20.24	37.41	0
1985-03-29	Hisar	19.5	35.84	5.6
1985-03-30	Hisar	18.01	33.07	0
1985-03-31	Hisar	16.06	32.59	0
1985-04-01	Hisar	18.23	33.63	0
1985-04-02	Hisar	19.32	35.36	0
1985-04-03	Hisar	17.94	32.23	0
1985-04-04	Hisar	15.82	29.66	0
1985-04-05	Hisar	16.67	31.56	0
1985-04-06	Hisar	18.39	33.57	0
1985-04-07	Hisar	17.37	31.81	0.1
1985-04-08	Hisar	19.33	34.29	0
1985-04-09	Hisar	19.29	33.63	1.4
1985-04-10	Hisar	15.44	30.77	4
1985-04-11	Hisar	15.79	31.01	0
1985-04-12	Hisar	17.54	33.19	0
1985-04-13	Hisar	22.75	36.51	0
1985-04-14	Hisar	17.32	33.23	0
1985-04-15	Hisar	18.22	33.54	0
1985-04-16	Hisar	17.36	34.93	0
1985-04-17	Hisar	18.4	37.1	0
1985-04-18	Hisar	19.85	38.56	0
1985-04-19	Hisar	20.5	39.65	0
1985-04-20	Hisar	20.81	40.69	0
1985-04-21	Hisar	23.73	41.31	0
1985-04-22	Hisar	21.98	40.77	0
1985-04-23	Hisar	21.29	39.22	0
1985-04-24	Hisar	21.26	39.59	0
1985-04-25	Hisar	21.38	38.15	0
1985-04-26	Hisar	20.32	38.45	0
1985-04-27	Hisar	20.71	39.44	0
1985-04-28	Hisar	23.15	40.78	0
1985-04-29	Hisar	24.07	41.72	0
1985-04-30	Hisar	23.52	42.14	0
1985-05-01	Hisar	25.32	41.63	0
1985-05-02	Hisar	21.61	40.43	0
1985-05-03	Hisar	20.34	38.13	0
1985-05-04	Hisar	21.66	38.87	0
1985-05-05	Hisar	21.25	39.07	0
1985-05-06	Hisar	21.54	39.91	0
1985-05-07	Hisar	24.02	41.5	0
1985-05-08	Hisar	26.49	42.59	0
1985-05-09	Hisar	25.02	41.36	0
1985-05-10	Hisar	24.82	40.46	0
1985-05-11	Hisar	22.92	38.36	0
1985-05-12	Hisar	22.05	39.25	0
1985-05-13	Hisar	23.35	40.68	0
1985-05-14	Hisar	20.8	41.23	0
1985-05-15	Hisar	20.33	39.62	0
1985-05-16	Hisar	20.13	39.95	0
1985-05-17	Hisar	21.15	41.25	0
1985-05-18	Hisar	22.1	42.53	0
1985-05-19	Hisar	22.98	43.58	0
1985-05-20	Hisar	24.23	44.21	0
1985-05-21	Hisar	24.93	44.32	0
1985-05-22	Hisar	27.29	43	0
1985-05-23	Hisar	25.84	41.4	0
1985-05-24	Hisar	27.9	42.17	0
1985-05-25	Hisar	23.81	43.28	0
1985-05-26	Hisar	26.06	42.06	0
1985-05-27	Hisar	25.4	43.35	0
1985-05-28	Hisar	24.12	43.64	0
1985-05-29	Hisar	25.74	43.77	0
1985-05-30	Hisar	26.77	43.84	0
1985-05-31	Hisar	27.39	43.5	0
1985-06-01	Hisar	25.72	41.13	5.9
1985-06-02	Hisar	26.33	40.42	0
1985-06-03	Hisar	22.42	37.98	18.7
1985-06-04	Hisar	25.32	38.25	0.2
1985-06-05	Hisar	25.79	41.31	4.7
1985-06-06	Hisar	27.49	43.14	0
1985-06-07	Hisar	27.84	41.5	0
1985-06-08	Hisar	23.15	39.15	0.3
1985-06-09	Hisar	22.75	34.78	4.3
1985-06-10	Hisar	25.38	36.99	0.5
1985-06-11	Hisar	21.99	38.78	1.3
1985-06-12	Hisar	22.83	33.43	2.8
1985-06-13	Hisar	25.37	37.8	0.3
1985-06-14	Hisar	26.43	39.28	0
1985-06-15	Hisar	28.27	42.08	0
1985-06-16	Hisar	28.16	42.95	0
1985-06-17	Hisar	28.65	41.82	0
1985-06-18	Hisar	28.77	42.09	0
1985-06-19	Hisar	28.85	42.91	0
1985-06-20	Hisar	29.64	41.81	0
1985-06-21	Hisar	28.83	40.45	0
1985-06-22	Hisar	28.72	41.24	0
1985-06-23	Hisar	28.7	41.32	0
1985-06-24	Hisar	27.79	42.65	0
1985-06-25	Hisar	29.32	42.81	0
1985-06-26	Hisar	28.77	41.11	0
1985-06-27	Hisar	28.57	41.84	0
1985-06-28	Hisar	25.15	40.5	0
1985-06-29	Hisar	27.41	38.3	0
1985-06-30	Hisar	23.9	39.08	0.4
1985-07-01	Hisar	25.67	35.79	0
1985-07-02	Hisar	26.07	37.76	0
1985-07-03	Hisar	26.78	38.3	0
1985-07-04	Hisar	26.94	40.03	0
1985-07-05	Hisar	28.39	41.23	0
1985-07-06	Hisar	27.83	40.86	0
1985-07-07	Hisar	26.47	40.32	0
1985-07-08	Hisar	26.54	37.3	1.9
1985-07-09	Hisar	25.59	37.86	1.8
1985-07-10	Hisar	24.55	34.51	18
1985-07-11	Hisar	25.38	32.52	19.3
1985-07-12	Hisar	25.34	32.18	2.4
1985-07-13	Hisar	25.85	33.7	2.2
1985-07-14	Hisar	25.44	34.07	0
1985-07-15	Hisar	24.57	34.45	7.9
1985-07-16	Hisar	25.03	32.27	0.2
1985-07-17	Hisar	24.69	31.65	0.9
1985-07-18	Hisar	25.09	33.02	6
1985-07-19	Hisar	25.12	33.12	7.9
1985-07-20	Hisar	24.2	31.77	44.8
1985-07-21	Hisar	23.93	30.45	5.6
1985-07-22	Hisar	25.07	33.05	0
1985-07-23	Hisar	25.58	33.48	2.4
1985-07-24	Hisar	26.65	35.31	0
1985-07-25	Hisar	24.82	32.22	0
1985-07-26	Hisar	24.65	32.48	30.6
1985-07-27	Hisar	24.83	31.57	0
1985-07-28	Hisar	26.06	33.8	0
1985-07-29	Hisar	25.71	34.68	2.5
1985-07-30	Hisar	25.13	32.46	0
1985-07-31	Hisar	26.01	32.99	0.2
1985-08-01	Hisar	26.07	33.41	0
1985-08-02	Hisar	25.42	35.75	0
1985-08-03	Hisar	24.42	34.04	9
1985-08-04	Hisar	24.62	33.9	7.7
1985-08-05	Hisar	24.28	29.2	136.4
1985-08-06	Hisar	23.91	28.19	6.1
1985-08-07	Hisar	23.16	28.6	0.8
1985-08-08	Hisar	25.03	33.24	0
1985-08-09	Hisar	25.75	34.58	0
1985-08-10	Hisar	26.59	35.34	0
1985-08-11	Hisar	25.43	33.44	0
1985-08-12	Hisar	24.98	33.62	0
1985-08-13	Hisar	26.34	34.9	0
1985-08-14	Hisar	25.28	36.03	0
1985-08-15	Hisar	25.94	34.52	0
1985-08-16	Hisar	26.1	35.1	0
1985-08-17	Hisar	26.03	35.96	0
1985-08-18	Hisar	25.88	34.83	0
1985-08-19	Hisar	26.04	34.46	2.7
1985-08-20	Hisar	25.78	34.18	0
1985-08-21	Hisar	26.21	34.73	0
1985-08-22	Hisar	26.3	35.17	0
1985-08-23	Hisar	25.74	34.64	0
1985-08-24	Hisar	25.27	34.79	0
1985-08-25	Hisar	24.62	35.28	0
1985-08-26	Hisar	25.35	35.21	0
1985-08-27	Hisar	25.2	35.55	0
1985-08-28	Hisar	25.36	35.55	0
1985-08-29	Hisar	26.09	36.18	0
1985-08-30	Hisar	26.05	36.77	0
1985-08-31	Hisar	26.21	36.47	0
1985-09-01	Hisar	24.74	34.74	3.6
1985-09-02	Hisar	25.41	35.29	0
1985-09-03	Hisar	25.65	35.89	0
1985-09-04	Hisar	25.49	35.59	0
1985-09-05	Hisar	24.65	35.48	0
1985-09-06	Hisar	23.83	35.14	0
1985-09-07	Hisar	24.27	35.38	0
1985-09-08	Hisar	23.89	35.35	0
1985-09-09	Hisar	24.05	35.94	0
1985-09-10	Hisar	23.72	36.2	0
1985-09-11	Hisar	22.46	36.36	0
1985-09-12	Hisar	23.22	36.38	0
1985-09-13	Hisar	23.11	34.45	0
1985-09-14	Hisar	22.63	33.14	0
1985-09-15	Hisar	21.97	33.76	0
1985-09-16	Hisar	22.28	34.19	0
1985-09-17	Hisar	22.34	32.56	0
1985-09-18	Hisar	22.74	32.12	0
1985-09-19	Hisar	22.99	34.19	0
1985-09-20	Hisar	23.19	35.38	0
1985-09-21	Hisar	23.38	35.12	0
1985-09-22	Hisar	23.4	34.31	0
1985-09-23	Hisar	24.25	34.77	0
1985-09-24	Hisar	21.87	33.05	17.9
1985-09-25	Hisar	20.94	28.86	0.1
1985-09-26	Hisar	22.22	32.77	0
1985-09-27	Hisar	22.62	34.1	0
1985-09-28	Hisar	22.16	35.29	0
1985-09-29	Hisar	22	36.16	0
1985-09-30	Hisar	21.21	36.33	0
1985-10-01	Hisar	21.59	35.91	0
1985-10-02	Hisar	21.63	36.14	0
1985-10-03	Hisar	22.23	35.47	0
1985-10-04	Hisar	22.31	34.6	0
1985-10-05	Hisar	21.77	34.09	0
1985-10-06	Hisar	20.81	33.07	0
1985-10-07	Hisar	20.06	28.68	0.4
1985-10-08	Hisar	19.67	26.62	0
1985-10-09	Hisar	18.69	26.53	0.4
1985-10-10	Hisar	17.72	25.28	0
1985-10-11	Hisar	17.25	28.04	0
1985-10-12	Hisar	17.05	29.63	0
1985-10-13	Hisar	18.37	31.8	0
1985-10-14	Hisar	17.75	32.04	0
1985-10-15	Hisar	17.68	32.29	0
1985-10-16	Hisar	16.63	32.28	0
1985-10-17	Hisar	14.39	32.12	0
1985-10-18	Hisar	13.27	31.12	0
1985-10-19	Hisar	12.47	31.24	0
1985-10-20	Hisar	12.5	31.92	0
1985-10-21	Hisar	12.31	32.63	0
1985-10-22	Hisar	12.52	32.97	0
1985-10-23	Hisar	13.03	32.07	0
1985-10-24	Hisar	13.63	32.2	0
1985-10-25	Hisar	13.69	32.22	0
1985-10-26	Hisar	14.59	32.04	0
1985-10-27	Hisar	13.44	31.18	0
1985-10-28	Hisar	13.24	31.32	0
1985-10-29	Hisar	12.42	31.56	0
1985-10-30	Hisar	12.36	32.1	0
1985-10-31	Hisar	13.38	31.91	0
1985-11-01	Hisar	13.6	31.45	0
1985-11-02	Hisar	14.8	32.24	0
1985-11-03	Hisar	14.02	32.01	0
1985-11-04	Hisar	11.98	30.92	0
1985-11-05	Hisar	11.56	29.72	0
1985-11-06	Hisar	12.14	29.9	0
1985-11-07	Hisar	12.98	30.35	0
1985-11-08	Hisar	11.6	30.57	0
1985-11-09	Hisar	11.6	29.8	0
1985-11-10	Hisar	13.62	29.99	0
1985-11-11	Hisar	11.01	26.72	0
1985-11-12	Hisar	10.4	27.51	0
1985-11-13	Hisar	9.67	27.76	0
1985-11-14	Hisar	9.5	27.77	0
1985-11-15	Hisar	9.76	27.84	0
1985-11-16	Hisar	10.46	28.72	0
1985-11-17	Hisar	9.88	28.72	0
1985-11-18	Hisar	10.11	28.11	0
1985-11-19	Hisar	10.47	27.8	0
1985-11-20	Hisar	10.34	28.01	0
1985-11-21	Hisar	10.33	28.46	0
1985-11-22	Hisar	10.68	28.33	0
1985-11-23	Hisar	9.79	28.62	0
1985-11-24	Hisar	7.72	27.22	0
1985-11-25	Hisar	8.22	27.09	0
1985-11-26	Hisar	8.54	26.49	0
1985-11-27	Hisar	8.55	26.06	0
1985-11-28	Hisar	7.37	25.94	0
1985-11-29	Hisar	8.22	26.06	0
1985-11-30	Hisar	8.47	26.25	0
1985-12-01	Hisar	8.74	27.23	0
1985-12-02	Hisar	7.39	27.16	0
1985-12-03	Hisar	6.83	26.89	0
1985-12-04	Hisar	6.37	26.55	0
1985-12-05	Hisar	6.25	26.32	0
1985-12-06	Hisar	6.62	26.83	0
1985-12-07	Hisar	8.02	27.2	0
1985-12-08	Hisar	9.45	26.84	0
1985-12-09	Hisar	4.74	23.93	0
1985-12-10	Hisar	2.96	21.14	0
1985-12-11	Hisar	5.62	21.1	0
1985-12-12	Hisar	8.91	19.49	0
1985-12-13	Hisar	10.93	23.61	0
1985-12-14	Hisar	12.64	25.15	3.5
1985-12-15	Hisar	13.36	25.27	0.2
1985-12-16	Hisar	12.77	25.11	0.2
1985-12-17	Hisar	12.7	23.69	0
1985-12-18	Hisar	10.36	20.75	0
1985-12-19	Hisar	7.24	22.66	0
1985-12-20	Hisar	7.8	22.12	0
1985-12-21	Hisar	6.92	22.86	0
1985-12-22	Hisar	7.65	24.02	0
1985-12-23	Hisar	8.22	23.99	0
1985-12-24	Hisar	10.02	23.02	0
1985-12-25	Hisar	12.34	23.3	0
1985-12-26	Hisar	12.6	20.24	2.3
1985-12-27	Hisar	9.75	20.53	1.1
1985-12-28	Hisar	6.6	17.12	0
1985-12-29	Hisar	6.41	18.62	0
1985-12-30	Hisar	6.48	19.34	0
1985-12-31	Hisar	5	19.71	0
1986-01-01	Hisar	4.71	18.88	0
1986-01-02	Hisar	4.48	19.16	0
1986-01-03	Hisar	2.66	18.93	0
1986-01-04	Hisar	2.19	19.2	0
1986-01-05	Hisar	1.72	19.05	0
1986-01-06	Hisar	1.58	19.76	0
1986-01-07	Hisar	2.45	20.7	0
1986-01-08	Hisar	2.78	20.56	0
1986-01-09	Hisar	3.03	21	0
1986-01-10	Hisar	4.11	21.17	0
1986-01-11	Hisar	5.07	21.47	0
1986-01-12	Hisar	6.73	20.73	0
1986-01-13	Hisar	5.68	21.31	0
1986-01-14	Hisar	5.87	22.15	0
1986-01-15	Hisar	4.21	20.95	0
1986-01-16	Hisar	3.76	20.3	0
1986-01-17	Hisar	4.45	20.69	0
1986-01-18	Hisar	5.04	21.73	0
1986-01-19	Hisar	4.18	21.22	0
1986-01-20	Hisar	5.84	20.9	0
1986-01-21	Hisar	7.17	19.19	0.4
1986-01-22	Hisar	7.95	21.74	0
1986-01-23	Hisar	8.03	23.33	0
1986-01-24	Hisar	4.7	20.7	0
1986-01-25	Hisar	4.51	20.62	0
1986-01-26	Hisar	5.52	21.33	0
1986-01-27	Hisar	6	20.99	0
1986-01-28	Hisar	5.74	21.45	0
1986-01-29	Hisar	7.34	21.42	0
1986-01-30	Hisar	8.21	19.49	0
1986-01-31	Hisar	5.81	21.21	0
1986-02-01	Hisar	4.95	20.82	0
1986-02-02	Hisar	5.25	21.2	0
1986-02-03	Hisar	5.73	22.49	0
1986-02-04	Hisar	6.81	22.2	0
1986-02-05	Hisar	7.14	24.37	0
1986-02-06	Hisar	5.91	22.3	0
1986-02-07	Hisar	5.08	22.58	0
1986-02-08	Hisar	5.55	23.69	0
1986-02-09	Hisar	9.45	23.63	0
1986-02-10	Hisar	11.2	18.85	3.7
1986-02-11	Hisar	10.52	16.76	0
1986-02-12	Hisar	8.6	19.35	0
1986-02-13	Hisar	9.65	18.67	1.3
1986-02-14	Hisar	9.29	18.64	1.4
1986-02-15	Hisar	8.37	21.56	0
1986-02-16	Hisar	7.23	21.7	0
1986-02-17	Hisar	7.63	21.48	0
1986-02-18	Hisar	10.36	23.9	0
1986-02-19	Hisar	8.6	24.1	0
1986-02-20	Hisar	9.47	22.81	0
1986-02-21	Hisar	10.95	20.76	0
1986-02-22	Hisar	9.08	20.97	0
1986-02-23	Hisar	7.5	21.63	0
1986-02-24	Hisar	7.21	22.75	0
1986-02-25	Hisar	8.04	23.49	0
1986-02-26	Hisar	8.24	24.03	0
1986-02-27	Hisar	8.11	24.58	0
1986-02-28	Hisar	8.68	25.12	0
1986-03-01	Hisar	9.12	26.37	0
1986-03-02	Hisar	10.63	26.5	0
1986-03-03	Hisar	10.17	26.92	0
1986-03-04	Hisar	11.77	27.93	0
1986-03-05	Hisar	11.34	27.95	0
1986-03-06	Hisar	12.42	29.2	0
1986-03-07	Hisar	13.9	29.57	0
1986-03-08	Hisar	12.9	30.25	0
1986-03-09	Hisar	14.4	28.77	0
1986-03-10	Hisar	15.36	30.49	0
1986-03-11	Hisar	17.03	31.65	0
1986-03-12	Hisar	15.3	30.91	0
1986-03-13	Hisar	15.74	31.25	0
1986-03-14	Hisar	17.17	31.29	0
1986-03-15	Hisar	13.1	28.37	0
1986-03-16	Hisar	11.11	25.22	0
1986-03-17	Hisar	12.49	25.7	0
1986-03-18	Hisar	14.37	25.66	0
1986-03-19	Hisar	12.32	25.26	1
1986-03-20	Hisar	9.63	24.89	0
1986-03-21	Hisar	12.66	25.53	0
1986-03-22	Hisar	13.82	23.43	0
1986-03-23	Hisar	12.75	26.87	1.3
1986-03-24	Hisar	11.97	27.05	0
1986-03-25	Hisar	11.06	27.17	0
1986-03-26	Hisar	12.43	27.12	0
1986-03-27	Hisar	15.13	30.32	0
1986-03-28	Hisar	15.99	33.44	0
1986-03-29	Hisar	16.61	34.34	0
1986-03-30	Hisar	16.07	32.19	0
1986-03-31	Hisar	14.69	32.42	0
1986-04-01	Hisar	13.66	30.77	0
1986-04-02	Hisar	15.17	32.72	0
1986-04-03	Hisar	12.64	32.07	0
1986-04-04	Hisar	12.46	31.18	0
1986-04-05	Hisar	11.99	29.45	0
1986-04-06	Hisar	13.75	31.21	0
1986-04-07	Hisar	14.76	33.49	0
1986-04-08	Hisar	15.94	34.52	0
1986-04-09	Hisar	17.69	35.48	0
1986-04-10	Hisar	18.79	36.24	0
1986-04-11	Hisar	21.26	36.4	0
1986-04-12	Hisar	21.12	37.43	0
1986-04-13	Hisar	22.02	36.92	0.2
1986-04-14	Hisar	20.23	36.57	0
1986-04-15	Hisar	19.54	37.05	0
1986-04-16	Hisar	20.4	36.78	0
1986-04-17	Hisar	18.64	37.2	0
1986-04-18	Hisar	18.13	36.58	0
1986-04-19	Hisar	18.05	37.11	0
1986-04-20	Hisar	19.79	38.95	0
1986-04-21	Hisar	19.91	39.75	0
1986-04-22	Hisar	21.39	40.64	0
1986-04-23	Hisar	21.85	40.86	0
1986-04-24	Hisar	23.5	41.08	0
1986-04-25	Hisar	24.35	39.04	0
1986-04-26	Hisar	19.58	36.92	0
1986-04-27	Hisar	19.77	35.99	0
1986-04-28	Hisar	19.2	35.19	0
1986-04-29	Hisar	18.95	34.11	0
1986-04-30	Hisar	18.67	35.76	0
1986-05-01	Hisar	20.51	38.49	0
1986-05-02	Hisar	21.27	39.24	0
1986-05-03	Hisar	21.25	38.94	0
1986-05-04	Hisar	19.71	36.9	0
1986-05-05	Hisar	20.07	37.42	0
1986-05-06	Hisar	20.62	40.26	0
1986-05-07	Hisar	22.03	42.07	0
1986-05-08	Hisar	25.7	41.29	0
1986-05-09	Hisar	25.03	39.93	1.4
1986-05-10	Hisar	21.7	37.81	0
1986-05-11	Hisar	22.19	38.61	0
1986-05-12	Hisar	24.28	37.59	0
1986-05-13	Hisar	25.93	40.99	0
1986-05-14	Hisar	23.79	40.79	0
1986-05-15	Hisar	23.89	41.18	0
1986-05-16	Hisar	25.49	42.15	0
1986-05-17	Hisar	22.99	38.91	0.5
1986-05-18	Hisar	24.43	38.83	0
1986-05-19	Hisar	21.98	39.7	0
1986-05-20	Hisar	19.71	34.29	4.2
1986-05-21	Hisar	16.42	33.72	0
1986-05-22	Hisar	17.31	34.27	0
1986-05-23	Hisar	18.37	35.44	0
1986-05-24	Hisar	19.24	36.7	0
1986-05-25	Hisar	21.17	38.82	0
1986-05-26	Hisar	23.51	40.5	0
1986-05-27	Hisar	20.18	39.31	25.9
1986-05-28	Hisar	20.31	32.43	0
1986-05-29	Hisar	21.29	33.69	0
1986-05-30	Hisar	21.4	36.04	0
1986-05-31	Hisar	20.2	35.28	4.5
1986-06-01	Hisar	20.09	31.42	1
1986-06-02	Hisar	22.13	35.76	0
1986-06-03	Hisar	23.77	38.03	1.9
1986-06-04	Hisar	23.75	39.03	0
1986-06-05	Hisar	20.85	38.79	1.5
1986-06-06	Hisar	23.21	38.65	0
1986-06-07	Hisar	24.7	39.42	0
1986-06-08	Hisar	24.24	40.92	0
1986-06-09	Hisar	23.02	41.34	0
1986-06-10	Hisar	25.01	42.94	0
1986-06-11	Hisar	29.08	44.7	0
1986-06-12	Hisar	30.79	43.47	0
1986-06-13	Hisar	30.39	42.6	0
1986-06-14	Hisar	27.97	42.95	0
1986-06-15	Hisar	27.26	41.71	0
1986-06-16	Hisar	28.15	43.04	0
1986-06-17	Hisar	29.47	43.13	0
1986-06-18	Hisar	30.07	42.61	0
1986-06-19	Hisar	30.26	43.21	0
1986-06-20	Hisar	29.91	43.16	0
1986-06-21	Hisar	29.03	41.48	0
1986-06-22	Hisar	29.16	41.16	0
1986-06-23	Hisar	28.52	39.93	0
1986-06-24	Hisar	26.86	39.24	0.2
1986-06-25	Hisar	24.32	35.51	9.6
1986-06-26	Hisar	25.34	33.13	2.9
1986-06-27	Hisar	26.45	32.65	1.7
1986-06-28	Hisar	24.56	32.49	1
1986-06-29	Hisar	25.32	34.84	46.7
1986-06-30	Hisar	22.48	31.38	20.5
1986-07-01	Hisar	21.66	31.91	6
1986-07-02	Hisar	24.34	32.54	1.5
1986-07-03	Hisar	25.31	34.55	0
1986-07-04	Hisar	26.2	36.11	0
1986-07-05	Hisar	28.2	37.24	0
1986-07-06	Hisar	28.63	37.42	0
1986-07-07	Hisar	26.63	38	0
1986-07-08	Hisar	25.19	34.53	15
1986-07-09	Hisar	24.51	32.72	2.1
1986-07-10	Hisar	24.22	33.94	0
1986-07-11	Hisar	24.54	34.14	0
1986-07-12	Hisar	22.86	35.82	23.4
1986-07-13	Hisar	25.34	35.94	0
1986-07-14	Hisar	27.34	37.18	0
1986-07-15	Hisar	27.29	36.76	0
1986-07-16	Hisar	28.04	37.41	0
1986-07-17	Hisar	27.33	37.5	0
1986-07-18	Hisar	26.92	35.94	0
1986-07-19	Hisar	25.8	34.21	0
1986-07-20	Hisar	25.22	34.68	0
1986-07-21	Hisar	26.6	35.85	0
1986-07-22	Hisar	25.62	36.1	0.7
1986-07-23	Hisar	26	35.75	0
1986-07-24	Hisar	25.84	33.23	2.3
1986-07-25	Hisar	25.45	33.03	1.2
1986-07-26	Hisar	25.05	33.58	0
1986-07-27	Hisar	24.83	32.94	0
1986-07-28	Hisar	24.6	31.62	3.2
1986-07-29	Hisar	24.37	32.83	0.9
1986-07-30	Hisar	24.16	31.34	0.1
1986-07-31	Hisar	25.67	32.98	0
1986-08-01	Hisar	23.87	32.54	40.9
1986-08-02	Hisar	24.39	29.82	2.3
1986-08-03	Hisar	25.75	34.12	0.4
1986-08-04	Hisar	25.08	34.77	0
1986-08-05	Hisar	25.44	32.12	0
1986-08-06	Hisar	26.73	34.5	0
1986-08-07	Hisar	26.38	35.2	0.6
1986-08-08	Hisar	26.25	34.72	0
1986-08-09	Hisar	26.35	35.46	0
1986-08-10	Hisar	27.03	35.71	0
1986-08-11	Hisar	26.71	36.77	0
1986-08-12	Hisar	26.53	37.71	1.5
1986-08-13	Hisar	24.97	34.89	29.3
1986-08-14	Hisar	24.59	32.03	0.7
1986-08-15	Hisar	26.03	33.58	0
1986-08-16	Hisar	26.45	34.87	0
1986-08-17	Hisar	25.45	34.51	0
1986-08-18	Hisar	24.64	34.76	2.2
1986-08-19	Hisar	24.13	32.9	0
1986-08-20	Hisar	24.56	34.73	0
1986-08-21	Hisar	24.52	34.05	5.5
1986-08-22	Hisar	24.16	33.98	0
1986-08-23	Hisar	25.3	34.91	0
1986-08-24	Hisar	25.02	35.05	0
1986-08-25	Hisar	24.69	35.83	0
1986-08-26	Hisar	24.49	35.44	0
1986-08-27	Hisar	24.21	35.04	0
1986-08-28	Hisar	24.36	35.32	0
1986-08-29	Hisar	25.19	36.07	0
1986-08-30	Hisar	24.87	36.74	0
1986-08-31	Hisar	24	36.38	0
1986-09-01	Hisar	24.15	36.11	0
1986-09-02	Hisar	24.6	36.55	0
1986-09-03	Hisar	24.66	36.37	0
1986-09-04	Hisar	24.55	36.32	0
1986-09-05	Hisar	23.66	36.87	0
1986-09-06	Hisar	22.93	36.77	0
1986-09-07	Hisar	23.75	37.88	0
1986-09-08	Hisar	23.94	37.56	0
1986-09-09	Hisar	23.68	38.26	0
1986-09-10	Hisar	24.3	38.1	0
1986-09-11	Hisar	25.28	37.9	0
1986-09-12	Hisar	24.48	37.33	0
1986-09-13	Hisar	23.1	35.29	0
1986-09-14	Hisar	22.31	34.33	0
1986-09-15	Hisar	23.18	33.25	0
1986-09-16	Hisar	22.05	34.51	0
1986-09-17	Hisar	21.23	35.25	0
1986-09-18	Hisar	21.45	36.2	0
1986-09-19	Hisar	21.38	37.24	0
1986-09-20	Hisar	21.93	37.43	0
1986-09-21	Hisar	22.02	37.24	0
1986-09-22	Hisar	23.56	37.09	0
1986-09-23	Hisar	20.53	34.97	26.8
1986-09-24	Hisar	21.53	34.86	0
1986-09-25	Hisar	20.47	33.75	0
1986-09-26	Hisar	20.45	31.24	0
1986-09-27	Hisar	20.27	31.61	1
1986-09-28	Hisar	19.74	28.48	2.4
1986-09-29	Hisar	19.58	27.71	0
1986-09-30	Hisar	19.14	30.26	5.4
1986-10-01	Hisar	19.86	30.34	0
1986-10-02	Hisar	20.06	31.6	0
1986-10-03	Hisar	20.65	32.65	0
1986-10-04	Hisar	21.09	33.63	0
1986-10-05	Hisar	20.2	34.18	25.6
1986-10-06	Hisar	20.29	33.51	5.3
1986-10-07	Hisar	20.71	33.8	0
1986-10-08	Hisar	21.32	34.46	0
1986-10-09	Hisar	21.04	34	0
1986-10-10	Hisar	21.89	33.98	0
1986-10-11	Hisar	22.03	34.47	0
1986-10-12	Hisar	21.53	34.61	0
1986-10-13	Hisar	20.73	34.32	0
1986-10-14	Hisar	20.07	34.34	0
1986-10-15	Hisar	20.89	34.87	0
1986-10-16	Hisar	16.65	33.85	0.3
1986-10-17	Hisar	17.87	29.55	5.5
1986-10-18	Hisar	15.22	28.91	0.4
1986-10-19	Hisar	16.5	30.34	0
1986-10-20	Hisar	14.65	30.65	0
1986-10-21	Hisar	13.11	30.4	0
1986-10-22	Hisar	12.61	30.79	0
1986-10-23	Hisar	12.5	31.33	0
1986-10-24	Hisar	12.93	31.42	0
1986-10-25	Hisar	12.57	31.19	0
1986-10-26	Hisar	12.75	31.26	0
1986-10-27	Hisar	12.93	31.51	0
1986-10-28	Hisar	13.32	32.29	0
1986-10-29	Hisar	14.05	32.94	0
1986-10-30	Hisar	15.12	32.67	0
1986-10-31	Hisar	14.93	32.81	0
1986-11-01	Hisar	14.21	32.2	0
1986-11-02	Hisar	14.27	31.97	0
1986-11-03	Hisar	13.64	30.76	0
1986-11-04	Hisar	13.13	30.74	0
1986-11-05	Hisar	12.19	30.85	0
1986-11-06	Hisar	11.59	30.25	0
1986-11-07	Hisar	11.82	30.45	0
1986-11-08	Hisar	11.43	30.18	0
1986-11-09	Hisar	11.41	29.31	0
1986-11-10	Hisar	11.66	28.9	0
1986-11-11	Hisar	11.94	30.51	0
1986-11-12	Hisar	12.41	31.84	0
1986-11-13	Hisar	13.42	30.61	0
1986-11-14	Hisar	14.21	30.45	0
1986-11-15	Hisar	15.34	31.57	0
1986-11-16	Hisar	15.32	30.87	0.3
1986-11-17	Hisar	12.86	29.16	0
1986-11-18	Hisar	9.25	27.01	0
1986-11-19	Hisar	7.34	26.7	0
1986-11-20	Hisar	7.62	27.4	0
1986-11-21	Hisar	8.16	27.31	0
1986-11-22	Hisar	8.67	27.98	0
1986-11-23	Hisar	9.37	29.35	0
1986-11-24	Hisar	8.67	27.96	0
1986-11-25	Hisar	11.08	27.05	0
1986-11-26	Hisar	13.2	26.08	0
1986-11-27	Hisar	14.59	24.68	0
1986-11-28	Hisar	11.68	24.35	0
1986-11-29	Hisar	9.98	23.75	0
1986-11-30	Hisar	8.39	25.05	0
1986-12-01	Hisar	7.95	23.23	0
1986-12-02	Hisar	6.33	23.39	0
1986-12-03	Hisar	6.44	23.78	0
1986-12-04	Hisar	6.8	24.9	0
1986-12-05	Hisar	6.37	25.09	0
1986-12-06	Hisar	6.72	26.04	0
1986-12-07	Hisar	8.75	25.39	0
1986-12-08	Hisar	9.03	22.6	0
1986-12-09	Hisar	9.23	22.65	0
1986-12-10	Hisar	9.3	24.37	0
1986-12-11	Hisar	10.74	24.39	0
1986-12-12	Hisar	11.67	24.46	0
1986-12-13	Hisar	11.47	23.17	0
1986-12-14	Hisar	5.04	21.16	0
1986-12-15	Hisar	1.93	18.48	0
1986-12-16	Hisar	2.34	17.07	0
1986-12-17	Hisar	2.34	17.4	0
1986-12-18	Hisar	3.18	17.93	0
1986-12-19	Hisar	1.56	17.9	0
1986-12-20	Hisar	1.53	18.46	0
1986-12-21	Hisar	3.53	17.85	0
1986-12-22	Hisar	3.07	19.42	0
1986-12-23	Hisar	2.26	19.68	0
1986-12-24	Hisar	2.07	19.81	0
1986-12-25	Hisar	3.17	20.19	0
1986-12-26	Hisar	2.78	21.13	0
1986-12-27	Hisar	2.03	21.55	0
1986-12-28	Hisar	2.27	21.79	0
1986-12-29	Hisar	3.27	20.86	0
1986-12-30	Hisar	2.6	21.15	0
1986-12-31	Hisar	2.43	20.38	0
1987-01-01	Hisar	4.53	21.11	0
1987-01-02	Hisar	4.29	21.59	0
1987-01-03	Hisar	4.19	21.74	0
1987-01-04	Hisar	5.46	22.4	0
1987-01-05	Hisar	7.11	22.75	0
1987-01-06	Hisar	6.75	21.59	0
1987-01-07	Hisar	6.62	21.86	0
1987-01-08	Hisar	8.21	23.23	0
1987-01-09	Hisar	8.64	22.9	0
1987-01-10	Hisar	9.17	21.5	0
1987-01-11	Hisar	9.36	21.42	0.6
1987-01-12	Hisar	8.87	22.41	0
1987-01-13	Hisar	9.47	20.91	0
1987-01-14	Hisar	7.27	18.47	0.9
1987-01-15	Hisar	5.78	18.33	0
1987-01-16	Hisar	7	19.83	0
1987-01-17	Hisar	9.2	14.26	28.3
1987-01-18	Hisar	6.35	15.09	0
1987-01-19	Hisar	6.28	18.22	0
1987-01-20	Hisar	5.58	19.07	0
1987-01-21	Hisar	4.77	20.57	0
1987-01-22	Hisar	5.13	20.78	0
1987-01-23	Hisar	4.39	21.55	0
1987-01-24	Hisar	5.55	21.6	0
1987-01-25	Hisar	4.96	21.14	0
1987-01-26	Hisar	4.93	22.02	0
1987-01-27	Hisar	5.16	23.01	0
1987-01-28	Hisar	5.5	24.2	0
1987-01-29	Hisar	6.14	24.15	0
1987-01-30	Hisar	7.09	23.45	0
1987-01-31	Hisar	8.79	23.94	0
1987-02-01	Hisar	10.56	25.38	0
1987-02-02	Hisar	8.2	24.61	0
1987-02-03	Hisar	8.1	24.26	0
1987-02-04	Hisar	7.03	24.51	0
1987-02-05	Hisar	7.34	24.12	0
1987-02-06	Hisar	6.9	24.87	0
1987-02-07	Hisar	7.74	26.12	0
1987-02-08	Hisar	9.52	26.84	0
1987-02-09	Hisar	9.26	26.74	0
1987-02-10	Hisar	8.64	25.38	0
1987-02-11	Hisar	8.16	24.84	0
1987-02-12	Hisar	8.28	24.47	0
1987-02-13	Hisar	9	25.25	0
1987-02-14	Hisar	10.84	25.16	0
1987-02-15	Hisar	11.99	26.04	0
1987-02-16	Hisar	10.94	25	1.2
1987-02-17	Hisar	9.82	22.4	0
1987-02-18	Hisar	12.24	24.77	0
1987-02-19	Hisar	10.47	24.66	0
1987-02-20	Hisar	11.71	24.77	0
1987-02-21	Hisar	10.89	25.9	0
1987-02-22	Hisar	11.89	26.2	0
1987-02-23	Hisar	12.74	27.36	0
1987-02-24	Hisar	14.23	28.25	12.5
1987-02-25	Hisar	12.33	26.38	0
1987-02-26	Hisar	10.31	23.77	0
1987-02-27	Hisar	9.27	22.91	0
1987-02-28	Hisar	9.75	23.45	0
1987-03-01	Hisar	9.92	24.4	0
1987-03-02	Hisar	10.25	25.7	0
1987-03-03	Hisar	10.65	26.69	0
1987-03-04	Hisar	11.29	27.92	0
1987-03-05	Hisar	14.08	28.6	0
1987-03-06	Hisar	14.58	26.87	0
1987-03-07	Hisar	14.58	29.8	0
1987-03-08	Hisar	13.81	29.26	0
1987-03-09	Hisar	13	28.68	0
1987-03-10	Hisar	12.82	28.87	0
1987-03-11	Hisar	13.74	27.71	0
1987-03-12	Hisar	10.72	25.7	1.4
1987-03-13	Hisar	13.94	27.43	1.6
1987-03-14	Hisar	12.59	24.59	0.4
1987-03-15	Hisar	14.13	28.18	0
1987-03-16	Hisar	15.57	30.17	0
1987-03-17	Hisar	14.89	30.08	0
1987-03-18	Hisar	14.14	29.69	0
1987-03-19	Hisar	16.02	30.51	0
1987-03-20	Hisar	14.24	29.47	0
1987-03-21	Hisar	15.86	29.96	0
1987-03-22	Hisar	16.55	30.82	8.5
1987-03-23	Hisar	16.78	29.24	3.3
1987-03-24	Hisar	15.91	29.81	0
1987-03-25	Hisar	16.07	31.07	0
1987-03-26	Hisar	17.18	32.92	0.7
1987-03-27	Hisar	16.26	32.32	0
1987-03-28	Hisar	15.62	29.47	0
1987-03-29	Hisar	17.04	31.51	0
1987-03-30	Hisar	16.53	32.3	0
1987-03-31	Hisar	16.73	32.5	0
1987-04-01	Hisar	18.11	33.37	0
1987-04-02	Hisar	18.81	35.03	0
1987-04-03	Hisar	18.18	33.71	0
1987-04-04	Hisar	18.29	32.46	3
1987-04-05	Hisar	16.6	33.88	0
1987-04-06	Hisar	16.61	34.25	0
1987-04-07	Hisar	18.31	35.45	0
1987-04-08	Hisar	21.41	36.34	0
1987-04-09	Hisar	18.26	35.6	1.2
1987-04-10	Hisar	16.01	32.7	0
1987-04-11	Hisar	14.49	32.42	0
1987-04-12	Hisar	16.17	34.09	0
1987-04-13	Hisar	16.11	34.85	0
1987-04-14	Hisar	16.69	34.87	0
1987-04-15	Hisar	16.6	35.27	0
1987-04-16	Hisar	18	35.85	0
1987-04-17	Hisar	19.16	36.98	0
1987-04-18	Hisar	20.49	39.29	0
1987-04-19	Hisar	20.05	39.51	0
1987-04-20	Hisar	21.15	39.49	0
1987-04-21	Hisar	23.39	40.54	0
1987-04-22	Hisar	23.14	41.46	0
1987-04-23	Hisar	24.17	40.78	0
1987-04-24	Hisar	22.61	39.1	0
1987-04-25	Hisar	18.72	37.62	0
1987-04-26	Hisar	18.78	37.1	0
1987-04-27	Hisar	19.29	38.56	0
1987-04-28	Hisar	21.28	39.26	0
1987-04-29	Hisar	23.21	39.11	0
1987-04-30	Hisar	24.58	39.49	0
1987-05-01	Hisar	21.66	38.14	0
1987-05-02	Hisar	18.35	33.07	9.1
1987-05-03	Hisar	15.43	29.5	7.9
1987-05-04	Hisar	17.14	30.74	0
1987-05-05	Hisar	19.09	32.72	0
1987-05-06	Hisar	23.07	35.38	0
1987-05-07	Hisar	20.09	34.12	7.6
1987-05-08	Hisar	18.1	32.1	8.5
1987-05-09	Hisar	18.26	31.08	9.9
1987-05-10	Hisar	17.05	27.68	0
1987-05-11	Hisar	19.27	32.36	0
1987-05-12	Hisar	20.15	33.34	0
1987-05-13	Hisar	18.69	30.28	0.4
1987-05-14	Hisar	18.73	29.95	3.2
1987-05-15	Hisar	20.85	33.27	0
1987-05-16	Hisar	21.48	35.3	0
1987-05-17	Hisar	21.58	36.01	0
1987-05-18	Hisar	20.62	36.82	0
1987-05-19	Hisar	23.48	38.85	0
1987-05-20	Hisar	26.37	40.85	0
1987-05-21	Hisar	26.44	41.53	0
1987-05-22	Hisar	25.27	41.05	0.1
1987-05-23	Hisar	21.99	38.65	0.3
1987-05-24	Hisar	21.16	34.82	0
1987-05-25	Hisar	21.2	35.81	0
1987-05-26	Hisar	23.07	38.84	0
1987-05-27	Hisar	24.52	40.87	0
1987-05-28	Hisar	25.41	41.51	0
1987-05-29	Hisar	25.81	41.54	0
1987-05-30	Hisar	25.15	41.74	0
1987-05-31	Hisar	27.15	41.38	0
1987-06-01	Hisar	25.72	41.8	0
1987-06-02	Hisar	26.63	41.24	0
1987-06-03	Hisar	27.37	42.38	0
1987-06-04	Hisar	25.6	41.25	0
1987-06-05	Hisar	25.35	40.55	0
1987-06-06	Hisar	25.22	42.47	0
1987-06-07	Hisar	26.93	43.87	0
1987-06-08	Hisar	28.23	45.16	0
1987-06-09	Hisar	25.38	43.11	0
1987-06-10	Hisar	24	36.86	5.6
1987-06-11	Hisar	22.79	34.23	0.2
1987-06-12	Hisar	24.07	35.76	0
1987-06-13	Hisar	25.45	37.09	0
1987-06-14	Hisar	26.4	38.36	0
1987-06-15	Hisar	27.58	39.17	0
1987-06-16	Hisar	27.32	40.13	0
1987-06-17	Hisar	25	39.46	3.8
1987-06-18	Hisar	25.98	40.86	0
1987-06-19	Hisar	26.04	41.92	0
1987-06-20	Hisar	26.71	42.4	0.9
1987-06-21	Hisar	25.72	42.12	0
1987-06-22	Hisar	27.97	39.82	0
1987-06-23	Hisar	25.62	39.73	6.4
1987-06-24	Hisar	25.41	40.35	0
1987-06-25	Hisar	26.53	41.33	0
1987-06-26	Hisar	27.41	42.11	0
1987-06-27	Hisar	27.25	42.71	0
1987-06-28	Hisar	27.44	43.67	0
1987-06-29	Hisar	28.71	44.38	0
1987-06-30	Hisar	30.35	44.14	0
1987-07-01	Hisar	30.07	42.51	0
1987-07-02	Hisar	28.36	42.78	0
1987-07-03	Hisar	29.21	42.51	0
1987-07-04	Hisar	29.1	42.45	0
1987-07-05	Hisar	29.8	42.47	0
1987-07-06	Hisar	28.6	41.21	0
1987-07-07	Hisar	25.45	39.77	0
1987-07-08	Hisar	24.69	37.79	0
1987-07-09	Hisar	27.44	38.4	0
1987-07-10	Hisar	25.8	37.54	0
1987-07-11	Hisar	26.91	36.03	0.8
1987-07-12	Hisar	26.2	38.69	0
1987-07-13	Hisar	26.68	36.81	2
1987-07-14	Hisar	26.53	38.21	0
1987-07-15	Hisar	26.55	37.76	14.4
1987-07-16	Hisar	27.69	38.23	0
1987-07-17	Hisar	26.79	38.83	0
1987-07-18	Hisar	27.9	39.48	0
1987-07-19	Hisar	28.58	40.19	0
1987-07-20	Hisar	28.92	41.04	2.3
1987-07-21	Hisar	28.36	40.56	0
1987-07-22	Hisar	29.47	40.74	0
1987-07-23	Hisar	29.49	40.03	0
1987-07-24	Hisar	30.31	39.7	0
1987-07-25	Hisar	30.37	39.15	0
1987-07-26	Hisar	27.21	38.13	0
1987-07-27	Hisar	26.59	35.11	0
1987-07-28	Hisar	27.51	37.07	0.3
1987-07-29	Hisar	28.48	37.97	0
1987-07-30	Hisar	28.59	39.67	0
1987-07-31	Hisar	29.78	40.53	0
1987-08-01	Hisar	28.8	40.06	0
1987-08-02	Hisar	29.65	40.7	0
1987-08-03	Hisar	29.45	39.51	0
1987-08-04	Hisar	28.53	38.96	0
1987-08-05	Hisar	25.12	39.3	1
1987-08-06	Hisar	26.76	37.45	0
1987-08-07	Hisar	26.86	36.13	0
1987-08-08	Hisar	26.28	35.76	0.6
1987-08-09	Hisar	27.67	37.12	0
1987-08-10	Hisar	28.81	38.88	0
1987-08-11	Hisar	29.51	40.71	0
1987-08-12	Hisar	29.2	40.15	0
1987-08-13	Hisar	26.19	37.72	0
1987-08-14	Hisar	22.8	34.26	1.6
1987-08-15	Hisar	23.91	34.31	0
1987-08-16	Hisar	26.09	35.7	0
1987-08-17	Hisar	26.19	36.52	0.3
1987-08-18	Hisar	27.17	37.1	0
1987-08-19	Hisar	25.49	37.54	0
1987-08-20	Hisar	27.38	38.29	0
1987-08-21	Hisar	25.67	37.49	0
1987-08-22	Hisar	25.79	35.92	0
1987-08-23	Hisar	27.07	37.07	0
1987-08-24	Hisar	25.8	36.03	4.6
1987-08-25	Hisar	27.27	35.95	0
1987-08-26	Hisar	27.9	37.59	0
1987-08-27	Hisar	27.09	37.31	0
1987-08-28	Hisar	25.94	34.17	0
1987-08-29	Hisar	24.58	30.98	11.1
1987-08-30	Hisar	25.73	34.13	0
1987-08-31	Hisar	26	34.56	0
1987-09-01	Hisar	25.55	36.18	24.4
1987-09-02	Hisar	26.71	36.38	0
1987-09-03	Hisar	27.46	36.61	0
1987-09-04	Hisar	27.02	37.37	0
1987-09-05	Hisar	25.93	37.57	0
1987-09-06	Hisar	25.67	35.76	0
1987-09-07	Hisar	26.5	36.41	0
1987-09-08	Hisar	26.67	37.15	0
1987-09-09	Hisar	25.9	36.07	0
1987-09-10	Hisar	26.15	35.63	0
1987-09-11	Hisar	25.35	35.72	0
1987-09-12	Hisar	24.88	36.58	0
1987-09-13	Hisar	25.23	37.31	0
1987-09-14	Hisar	24.08	37.51	0
1987-09-15	Hisar	23.47	37.58	0
1987-09-16	Hisar	22.55	37.24	0
1987-09-17	Hisar	23.7	37.34	0
1987-09-18	Hisar	23.77	37.62	0
1987-09-19	Hisar	23.44	37.42	0
1987-09-20	Hisar	23.73	38.17	0
1987-09-21	Hisar	23.4	38.75	0
1987-09-22	Hisar	23.56	38.19	0
1987-09-23	Hisar	24.36	37.56	0
1987-09-24	Hisar	23.42	37.66	0
1987-09-25	Hisar	22.8	38.22	0
1987-09-26	Hisar	24.33	38.91	0
1987-09-27	Hisar	22.57	38.56	0
1987-09-28	Hisar	23.23	38.07	0
1987-09-29	Hisar	22.89	36.93	0
1987-09-30	Hisar	21.78	37.02	0
1987-10-01	Hisar	20.91	37.4	0
1987-10-02	Hisar	21.8	38.21	0
1987-10-03	Hisar	22.03	37.94	0
1987-10-04	Hisar	19.39	37.01	0
1987-10-05	Hisar	19.26	36.53	0
1987-10-06	Hisar	19.7	36.41	0
1987-10-07	Hisar	19.24	36.51	0
1987-10-08	Hisar	20.67	36.52	0
1987-10-09	Hisar	21.12	36.48	0
1987-10-10	Hisar	21.45	36.05	0
1987-10-11	Hisar	22.28	36.61	0
1987-10-12	Hisar	22.82	36.45	0
1987-10-13	Hisar	21	36.36	0
1987-10-14	Hisar	19.03	36.66	0
1987-10-15	Hisar	18.68	36.25	0
1987-10-16	Hisar	19.64	36.04	0
1987-10-17	Hisar	21.14	36.05	0
1987-10-18	Hisar	20.78	35.37	0
1987-10-19	Hisar	19.05	33.92	3.1
1987-10-20	Hisar	13.4	29.91	0
1987-10-21	Hisar	14.12	28.94	0
1987-10-22	Hisar	13.63	30.37	0
1987-10-23	Hisar	14.17	31.02	0
1987-10-24	Hisar	14.85	31.76	0
1987-10-25	Hisar	14.97	32.54	0
1987-10-26	Hisar	15.28	33.34	0
1987-10-27	Hisar	16.02	33.43	0
1987-10-28	Hisar	16.37	33.52	0
1987-10-29	Hisar	17.08	34.22	0
1987-10-30	Hisar	18.21	34.49	0
1987-10-31	Hisar	15.77	33.37	0
1987-11-01	Hisar	14.36	33.02	0
1987-11-02	Hisar	11.52	31.17	0
1987-11-03	Hisar	11.16	30.65	0
1987-11-04	Hisar	10.7	30.9	0
1987-11-05	Hisar	11.11	30.46	0
1987-11-06	Hisar	12.03	30.36	0
1987-11-07	Hisar	11.51	30.47	0
1987-11-08	Hisar	12.26	31.17	0
1987-11-09	Hisar	11.84	31.62	0
1987-11-10	Hisar	11.44	31.58	0
1987-11-11	Hisar	11.07	31.31	0
1987-11-12	Hisar	12.54	31.19	0
1987-11-13	Hisar	11.43	31.09	0
1987-11-14	Hisar	10.87	30.27	0
1987-11-15	Hisar	9.82	30.5	0
1987-11-16	Hisar	9.32	30.15	0
1987-11-17	Hisar	10.21	30.36	0
1987-11-18	Hisar	9.9	30.02	0
1987-11-19	Hisar	9.6	29.45	0
1987-11-20	Hisar	8.67	28.58	0
1987-11-21	Hisar	8.07	28.36	0
1987-11-22	Hisar	7.4	28.65	0
1987-11-23	Hisar	7.63	28.92	0
1987-11-24	Hisar	7.52	28.92	0
1987-11-25	Hisar	7.28	28.27	0
1987-11-26	Hisar	8.07	28.82	0
1987-11-27	Hisar	7.41	28.58	0
1987-11-28	Hisar	7.29	27.3	0
1987-11-29	Hisar	7.51	26.8	0
1987-11-30	Hisar	6.51	27.88	0
1987-12-01	Hisar	7.02	27.84	0
1987-12-02	Hisar	9.96	27.81	0
1987-12-03	Hisar	8.56	27.23	0
1987-12-04	Hisar	6.29	24.14	0
1987-12-05	Hisar	4.32	22.76	0
1987-12-06	Hisar	3.45	23.3	0
1987-12-07	Hisar	4.69	23.57	0
1987-12-08	Hisar	4.68	23.78	0
1987-12-09	Hisar	5.24	24.22	0
1987-12-10	Hisar	6.36	23.88	0
1987-12-11	Hisar	9.16	23.93	0
1987-12-12	Hisar	10.64	20.85	4.6
1987-12-13	Hisar	7.37	20.61	0
1987-12-14	Hisar	5.93	22.03	0
1987-12-15	Hisar	5.62	23.81	0
1987-12-16	Hisar	5.35	24.31	0
1987-12-17	Hisar	5.23	24.08	0
1987-12-18	Hisar	5.78	23.64	0
1987-12-19	Hisar	4.96	23.76	0
1987-12-20	Hisar	4.94	23.94	0
1987-12-21	Hisar	5.56	23.74	0
1987-12-22	Hisar	5.74	24.05	0
1987-12-23	Hisar	5.01	23.41	0
1987-12-24	Hisar	4.82	22.93	0
1987-12-25	Hisar	5	22.57	0
1987-12-26	Hisar	5.56	23.14	0
1987-12-27	Hisar	4.7	23.27	0
1987-12-28	Hisar	4.69	22.57	0
1987-12-29	Hisar	4.84	22.62	0
1987-12-30	Hisar	6.84	21.43	0
1987-12-31	Hisar	7.03	21.33	0
1988-01-01	Hisar	6.76	21.16	0
1988-01-02	Hisar	9.12	22.8	0
1988-01-03	Hisar	8.59	21.47	0
1988-01-04	Hisar	7.84	22.88	0
1988-01-05	Hisar	9.25	22.81	0
1988-01-06	Hisar	9.29	21.54	0
1988-01-07	Hisar	7.1	22.65	0
1988-01-08	Hisar	6.59	22.07	0
1988-01-09	Hisar	7.28	22.3	0
1988-01-10	Hisar	6.6	23.14	0
1988-01-11	Hisar	8.17	22.09	0
1988-01-12	Hisar	10.79	21.11	0.1
1988-01-13	Hisar	8.29	21.84	0
1988-01-14	Hisar	6.31	21.66	0.1
1988-01-15	Hisar	6.37	21.16	0
1988-01-16	Hisar	5.96	21.25	0
1988-01-17	Hisar	5.68	21.74	0
1988-01-18	Hisar	5.02	22.61	0
1988-01-19	Hisar	5.32	23.07	0
1988-01-20	Hisar	4.82	24.21	0
1988-01-21	Hisar	6.63	24.61	0
1988-01-22	Hisar	8.59	22.01	1.8
1988-01-23	Hisar	5.44	22.34	0
1988-01-24	Hisar	3.52	20.01	0
1988-01-25	Hisar	3.55	19.77	0
1988-01-26	Hisar	3.27	20.03	0
1988-01-27	Hisar	3.45	21.18	0
1988-01-28	Hisar	6.83	22.79	0.2
1988-01-29	Hisar	6.46	22.95	0.3
1988-01-30	Hisar	5.1	21.63	0
1988-01-31	Hisar	6.74	22.61	0
1988-02-01	Hisar	7.28	23.2	0
1988-02-02	Hisar	5.31	22.26	0
1988-02-03	Hisar	5.8	23.93	0
1988-02-04	Hisar	5.76	25.1	0
1988-02-05	Hisar	5.84	26.3	0
1988-02-06	Hisar	7.39	27.18	0
1988-02-07	Hisar	8.59	28.44	0
1988-02-08	Hisar	10.43	28.48	0
1988-02-09	Hisar	9.08	26.96	0
1988-02-10	Hisar	5.96	23.42	0
1988-02-11	Hisar	7.95	24.13	0
1988-02-12	Hisar	10.36	25.81	14
1988-02-13	Hisar	9.51	22.84	1.3
1988-02-14	Hisar	11.87	25.76	2.2
1988-02-15	Hisar	7.84	20.19	0
1988-02-16	Hisar	9.37	21.97	0
1988-02-17	Hisar	8.84	23.11	0
1988-02-18	Hisar	9.62	24.64	0
1988-02-19	Hisar	11.35	24.34	0
1988-02-20	Hisar	11.47	25.06	0
1988-02-21	Hisar	12.69	26.27	0
1988-02-22	Hisar	11.88	26.48	0
1988-02-23	Hisar	8.64	25.34	0
1988-02-24	Hisar	7.49	24.56	0
1988-02-25	Hisar	7.52	24.68	0
1988-02-26	Hisar	8.49	25.55	0
1988-02-27	Hisar	11.53	26.31	0
1988-02-28	Hisar	13.58	24.51	0.3
1988-02-29	Hisar	10.52	25.08	0
1988-03-01	Hisar	10.63	25.42	0
1988-03-02	Hisar	9.32	24.72	0
1988-03-03	Hisar	9.88	25.84	0
1988-03-04	Hisar	11.11	27.66	0
1988-03-05	Hisar	11.56	29.56	0
1988-03-06	Hisar	12.21	30.12	0
1988-03-07	Hisar	14.64	29.82	0
1988-03-08	Hisar	16.73	29	0
1988-03-09	Hisar	12.72	24.12	1.6
1988-03-10	Hisar	14.86	25.97	1.5
1988-03-11	Hisar	16.64	27.64	5.8
1988-03-12	Hisar	15.39	23.84	7.3
1988-03-13	Hisar	13.5	25.32	0
1988-03-14	Hisar	10.47	26.54	0
1988-03-15	Hisar	12.72	26.06	0
1988-03-16	Hisar	15.84	28.81	0
1988-03-17	Hisar	15.69	29.34	0
1988-03-18	Hisar	11.75	27.47	0
1988-03-19	Hisar	12.37	28.64	0.3
1988-03-20	Hisar	11.89	26.53	0
1988-03-21	Hisar	11.08	27.36	0
1988-03-22	Hisar	11.52	29.06	0
1988-03-23	Hisar	13.5	30.5	0
1988-03-24	Hisar	15.82	33.38	0
1988-03-25	Hisar	18.42	34.33	0
1988-03-26	Hisar	20.01	32.63	0
1988-03-27	Hisar	15.1	30.75	0
1988-03-28	Hisar	12.29	27.67	0
1988-03-29	Hisar	13.68	28.64	0
1988-03-30	Hisar	13.75	31.73	0
1988-03-31	Hisar	12.96	32.44	0
1988-04-01	Hisar	13.52	32.78	0
1988-04-02	Hisar	14.34	33.46	0
1988-04-03	Hisar	16.93	35.03	0
1988-04-04	Hisar	18.59	36.95	0
1988-04-05	Hisar	17.91	36.1	0
1988-04-06	Hisar	15.61	34.15	0
1988-04-07	Hisar	16	34.32	0
1988-04-08	Hisar	17.74	36.04	0
1988-04-09	Hisar	18.89	37.87	0
1988-04-10	Hisar	18.6	37.91	0
1988-04-11	Hisar	19.57	39.45	0
1988-04-12	Hisar	19.97	39.88	0
1988-04-13	Hisar	21.06	40.36	0
1988-04-14	Hisar	20.37	40.06	0
1988-04-15	Hisar	19.23	39.39	0
1988-04-16	Hisar	19.48	41.03	0
1988-04-17	Hisar	22.64	41.69	0
1988-04-18	Hisar	25.89	39.83	0
1988-04-19	Hisar	22.01	36.55	0.2
1988-04-20	Hisar	18.97	33.67	0
1988-04-21	Hisar	20.56	35.62	0
1988-04-22	Hisar	21.45	37.65	2.1
1988-04-23	Hisar	21.48	38.09	0
1988-04-24	Hisar	22.55	38.98	0
1988-04-25	Hisar	20.85	36.05	0
1988-04-26	Hisar	23.02	38.8	0
1988-04-27	Hisar	24.35	39.67	0
1988-04-28	Hisar	23.74	40.92	0.2
1988-04-29	Hisar	25.71	41.86	0
1988-04-30	Hisar	27.3	41.04	0
1988-05-01	Hisar	25.86	39.99	0
1988-05-02	Hisar	23.97	38.93	0
1988-05-03	Hisar	22.91	39.76	0
1988-05-04	Hisar	23.39	39.39	0
1988-05-05	Hisar	23.12	38.53	0
1988-05-06	Hisar	23.99	41.42	0
1988-05-07	Hisar	26.36	41.14	0
1988-05-08	Hisar	25.82	42.07	0
1988-05-09	Hisar	22.84	42.68	0
1988-05-10	Hisar	21.43	42.16	0
1988-05-11	Hisar	23.16	43.02	0
1988-05-12	Hisar	23.02	44.03	0
1988-05-13	Hisar	24.48	44.52	0
1988-05-14	Hisar	25.87	45.29	0
1988-05-15	Hisar	28.04	43.73	0
1988-05-16	Hisar	26.43	40.72	0
1988-05-17	Hisar	28.03	42.75	0
1988-05-18	Hisar	23.11	42.39	0.2
1988-05-19	Hisar	26.15	39.26	0
1988-05-20	Hisar	22.81	39.52	0
1988-05-21	Hisar	23.56	40.41	0
1988-05-22	Hisar	26.62	41.73	0
1988-05-23	Hisar	25.45	41.74	0
1988-05-24	Hisar	27.66	43.04	0.2
1988-05-25	Hisar	27.35	43.68	0
1988-05-26	Hisar	27.07	44.71	0
1988-05-27	Hisar	28.09	45.32	0
1988-05-28	Hisar	29.88	45.88	0
1988-05-29	Hisar	27.85	45.26	0
1988-05-30	Hisar	28.92	45.55	0
1988-05-31	Hisar	30.58	45.97	0
1988-06-01	Hisar	30.01	44.25	0
1988-06-02	Hisar	27.98	43.52	0
1988-06-03	Hisar	27.82	42.26	0
1988-06-04	Hisar	27.48	43.46	0
1988-06-05	Hisar	24.15	43.93	2.6
1988-06-06	Hisar	24.79	37.96	0.5
1988-06-07	Hisar	24.94	38.79	0
1988-06-08	Hisar	25.25	40.26	0
1988-06-09	Hisar	26.69	42.21	0
1988-06-10	Hisar	25.4	42.47	0
1988-06-11	Hisar	26.56	42.7	0
1988-06-12	Hisar	27.12	43.57	0
1988-06-13	Hisar	28.58	45.01	0
1988-06-14	Hisar	29.38	44.84	0
1988-06-15	Hisar	29.19	39.51	0
1988-06-16	Hisar	24.67	41.29	8.4
1988-06-17	Hisar	27.29	40.8	0
1988-06-18	Hisar	23.85	40.52	0
1988-06-19	Hisar	26.2	36.37	0
1988-06-20	Hisar	26.54	35.54	1.3
1988-06-21	Hisar	27.21	36.85	3.3
1988-06-22	Hisar	27.42	36.57	0.1
1988-06-23	Hisar	24.78	35.62	27.3
1988-06-24	Hisar	27.09	35.98	1.3
1988-06-25	Hisar	27.59	36.49	9
1988-06-26	Hisar	28.26	38.12	0
1988-06-27	Hisar	29.01	39.26	0
1988-06-28	Hisar	30.38	40.87	0
1988-06-29	Hisar	27.13	40.02	0
1988-06-30	Hisar	24.64	36.44	0
1988-07-01	Hisar	26.98	34.66	12.9
1988-07-02	Hisar	26.74	35.95	0
1988-07-03	Hisar	25.54	35.03	3.7
1988-07-04	Hisar	25.63	32.57	2.6
1988-07-05	Hisar	27.68	35.21	0
1988-07-06	Hisar	26.26	36.06	0
1988-07-07	Hisar	24.77	32.5	0
1988-07-08	Hisar	24.15	31.55	0.6
1988-07-09	Hisar	27.01	36.19	7.1
1988-07-10	Hisar	28.07	37.01	0
1988-07-11	Hisar	27.43	36.54	0.1
1988-07-12	Hisar	27.59	36.05	0
1988-07-13	Hisar	24.4	36.25	15.9
1988-07-14	Hisar	25.05	29.67	35.6
1988-07-15	Hisar	25.32	30.79	5.8
1988-07-16	Hisar	25.26	31.3	6.8
1988-07-17	Hisar	25.78	32.49	0.5
1988-07-18	Hisar	26.45	34.16	0
1988-07-19	Hisar	26.58	34.14	0
1988-07-20	Hisar	27.27	35.11	0
1988-07-21	Hisar	27.16	35.89	0
1988-07-22	Hisar	26.27	33.16	0
1988-07-23	Hisar	26.62	33.4	3.7
1988-07-24	Hisar	25.09	32.08	71.4
1988-07-25	Hisar	25.22	31.72	10
1988-07-26	Hisar	27.22	34.42	0
1988-07-27	Hisar	26.15	35.87	0
1988-07-28	Hisar	26.21	32.56	3.2
1988-07-29	Hisar	26.97	33.01	0
1988-07-30	Hisar	27.92	35.53	0
1988-07-31	Hisar	26.93	35.25	26
1988-08-01	Hisar	24.88	29.17	9.6
1988-08-02	Hisar	24.76	30.06	21.8
1988-08-03	Hisar	24.33	29.16	41.8
1988-08-04	Hisar	26.09	32.68	0
1988-08-05	Hisar	25.67	34.12	0.2
1988-08-06	Hisar	25.96	33.78	0
1988-08-07	Hisar	26.5	33.29	0
1988-08-08	Hisar	25.86	33.65	0
1988-08-09	Hisar	25.03	29.7	0
1988-08-10	Hisar	26.03	32.01	1.6
1988-08-11	Hisar	25.52	34.84	0.6
1988-08-12	Hisar	24.87	34.31	9.9
1988-08-13	Hisar	25.53	32.73	0
1988-08-14	Hisar	26.49	34.36	0
1988-08-15	Hisar	25.65	34.04	0
1988-08-16	Hisar	26.53	33.05	0
1988-08-17	Hisar	26.38	34.51	0
1988-08-18	Hisar	26.41	35.97	0
1988-08-19	Hisar	25.94	34.15	0.3
1988-08-20	Hisar	25.32	31.62	20.1
1988-08-21	Hisar	25.47	31.23	0
1988-08-22	Hisar	25.5	33.56	0
1988-08-23	Hisar	25.22	35.23	4.9
1988-08-24	Hisar	24.75	33.15	0
1988-08-25	Hisar	25.37	34.02	0
1988-08-26	Hisar	25.05	33.7	9.2
1988-08-27	Hisar	24.28	34.03	2.3
1988-08-28	Hisar	25.32	34.28	0
1988-08-29	Hisar	24.59	34.96	0
1988-08-30	Hisar	23.14	35.55	0.1
1988-08-31	Hisar	23.91	35.15	0
1988-09-01	Hisar	24.26	35.24	0
1988-09-02	Hisar	25.09	36.1	0
1988-09-03	Hisar	25.87	36.79	0
1988-09-04	Hisar	25.88	37.3	0
1988-09-05	Hisar	26.28	37.83	0
1988-09-06	Hisar	26.6	37.55	0
1988-09-07	Hisar	25.96	36.88	0
1988-09-08	Hisar	25.75	37.16	0
1988-09-09	Hisar	25.15	36.29	0
1988-09-10	Hisar	21.7	34.01	30.9
1988-09-11	Hisar	22.58	32.06	11
1988-09-12	Hisar	23.44	34.23	0
1988-09-13	Hisar	24.94	35.46	0
1988-09-14	Hisar	25.87	36.7	0
1988-09-15	Hisar	25.16	37.26	0
1988-09-16	Hisar	23.98	37.29	0
1988-09-17	Hisar	22.34	33.65	0
1988-09-18	Hisar	22.36	31.23	0
1988-09-19	Hisar	22.79	32.9	0
1988-09-20	Hisar	24.3	34.07	0
1988-09-21	Hisar	24.39	33.96	0.4
1988-09-22	Hisar	22.63	32.88	0
1988-09-23	Hisar	21.87	31.45	41
1988-09-24	Hisar	21.52	28.22	103.1
1988-09-25	Hisar	23.67	28.64	67.2
1988-09-26	Hisar	24.33	31.34	4.7
1988-09-27	Hisar	22.58	31.72	0.2
1988-09-28	Hisar	22.54	31.29	0
1988-09-29	Hisar	22.08	32.75	0
1988-09-30	Hisar	21.89	34.13	0
1988-10-01	Hisar	21.58	33.74	0
1988-10-02	Hisar	21.29	33.62	0
1988-10-03	Hisar	20.4	33.48	0
1988-10-04	Hisar	20.75	33.48	0
1988-10-05	Hisar	19.94	33	0
1988-10-06	Hisar	16.51	31.99	0
1988-10-07	Hisar	15.52	32.78	0
1988-10-08	Hisar	17.48	33.03	0
1988-10-09	Hisar	17.81	32.95	0
1988-10-10	Hisar	17.43	31.8	0
1988-10-11	Hisar	15.86	31.76	0
1988-10-12	Hisar	16.27	32.32	0
1988-10-13	Hisar	17.18	33.74	0
1988-10-14	Hisar	17.19	33.94	0
1988-10-15	Hisar	16.14	33.39	0
1988-10-16	Hisar	15.66	33.19	0
1988-10-17	Hisar	15.24	33.31	0
1988-10-18	Hisar	17.58	33.93	0
1988-10-19	Hisar	18.02	34.24	0
1988-10-20	Hisar	17.24	34.55	0
1988-10-21	Hisar	16.15	33.71	0
1988-10-22	Hisar	15.88	33.05	0
1988-10-23	Hisar	15.48	33.13	0
1988-10-24	Hisar	15.54	34.2	0
1988-10-25	Hisar	16.12	33.99	0
1988-10-26	Hisar	15.94	33.89	0
1988-10-27	Hisar	16.57	33.24	0
1988-10-28	Hisar	15.2	32.65	0
1988-10-29	Hisar	15.03	32.48	0
1988-10-30	Hisar	14.54	31.89	0
1988-10-31	Hisar	13.9	31.55	0
1988-11-01	Hisar	13.89	31.21	0
1988-11-02	Hisar	13.67	30.89	0
1988-11-03	Hisar	13.82	30.96	0
1988-11-04	Hisar	13.32	30.97	0
1988-11-05	Hisar	13	29.97	0
1988-11-06	Hisar	12.78	30.16	0
1988-11-07	Hisar	12.74	30.73	0
1988-11-08	Hisar	12.84	30.94	0
1988-11-09	Hisar	12.64	31.05	0
1988-11-10	Hisar	12.91	30.87	0
1988-11-11	Hisar	12.65	30.3	0
1988-11-12	Hisar	12.19	29.94	0
1988-11-13	Hisar	11.68	28.68	0
1988-11-14	Hisar	11.51	29.03	0
1988-11-15	Hisar	10.75	29.36	0
1988-11-16	Hisar	11.7	29.64	0
1988-11-17	Hisar	10.85	28.57	0
1988-11-18	Hisar	10.85	28.07	0
1988-11-19	Hisar	10.7	27.86	0
1988-11-20	Hisar	9.37	27.73	0
1988-11-21	Hisar	9.5	28.4	0
1988-11-22	Hisar	10.39	28.05	0
1988-11-23	Hisar	11.6	27.42	0
1988-11-24	Hisar	11.53	26.47	0.8
1988-11-25	Hisar	11.24	26.84	0
1988-11-26	Hisar	7.79	24.83	0
1988-11-27	Hisar	6.65	23.75	0
1988-11-28	Hisar	6.07	23.73	0
1988-11-29	Hisar	6.78	24.01	0
1988-11-30	Hisar	6.53	25.33	0
1988-12-01	Hisar	5.28	25.43	0
1988-12-02	Hisar	5.69	25.48	0
1988-12-03	Hisar	5.17	25.46	0
1988-12-04	Hisar	5.55	24.8	0
1988-12-05	Hisar	5.06	23.99	0
1988-12-06	Hisar	5.97	25.27	0
1988-12-07	Hisar	5.07	24.6	0
1988-12-08	Hisar	4.7	24.23	0
1988-12-09	Hisar	5.56	25.34	0
1988-12-10	Hisar	5.4	25.32	0
1988-12-11	Hisar	6.11	25.33	0
1988-12-12	Hisar	6.67	24.03	0
1988-12-13	Hisar	6.31	25.49	0
1988-12-14	Hisar	6.59	25.67	0
1988-12-15	Hisar	8.58	25.48	0
1988-12-16	Hisar	6.59	25.16	0
1988-12-17	Hisar	8.47	24.21	0
1988-12-18	Hisar	9.57	23.85	0
1988-12-19	Hisar	11.21	24.07	0
1988-12-20	Hisar	12.82	20.45	0.6
1988-12-21	Hisar	9.9	22.73	0
1988-12-22	Hisar	10.06	22.51	0
1988-12-23	Hisar	10.37	19.13	0
1988-12-24	Hisar	9.42	21.76	0
1988-12-25	Hisar	9.03	21.33	0.4
1988-12-26	Hisar	5.21	18.67	0
1988-12-27	Hisar	5.74	18.72	0
1988-12-28	Hisar	5.36	19.3	0
1988-12-29	Hisar	5.48	20.35	0
1988-12-30	Hisar	6.01	21.69	0
1988-12-31	Hisar	6.07	22.79	0
1989-01-01	Hisar	8.04	22.55	0
1989-01-02	Hisar	10.37	22.36	0
1989-01-03	Hisar	7.97	18.29	0
1989-01-04	Hisar	8.22	19.82	0
1989-01-05	Hisar	9.66	18.87	0
1989-01-06	Hisar	10.81	18.02	14.4
1989-01-07	Hisar	9.96	17.94	0.1
1989-01-08	Hisar	8.08	15.42	0.2
1989-01-09	Hisar	4.82	16.53	0
1989-01-10	Hisar	3.52	16.11	0
1989-01-11	Hisar	2.86	17.12	0
1989-01-12	Hisar	1.95	17.58	0
1989-01-13	Hisar	1.59	18.54	0
1989-01-14	Hisar	2.98	19.31	0
1989-01-15	Hisar	3.03	18.14	0
1989-01-16	Hisar	3.85	18.44	0
1989-01-17	Hisar	3.96	19.38	0
1989-01-18	Hisar	2.43	19.36	0
1989-01-19	Hisar	2.87	19.5	0
1989-01-20	Hisar	3.98	19.26	0
1989-01-21	Hisar	3.87	18.44	0
1989-01-22	Hisar	2.43	19.49	0
1989-01-23	Hisar	3.11	20.01	0
1989-01-24	Hisar	2.46	20.96	0
1989-01-25	Hisar	2.87	22.07	0
1989-01-26	Hisar	4.01	22.34	0
1989-01-27	Hisar	4.85	22.61	0
1989-01-28	Hisar	4.8	22.56	0
1989-01-29	Hisar	4.97	21.76	0
1989-01-30	Hisar	5.98	21.77	0
1989-01-31	Hisar	8.14	22.65	0
1989-02-01	Hisar	8.38	22.01	0
1989-02-02	Hisar	7.6	23.33	0
1989-02-03	Hisar	7.21	21.86	0
1989-02-04	Hisar	9	22.55	0
1989-02-05	Hisar	10.35	24.2	0.1
1989-02-06	Hisar	6.29	23.18	0
1989-02-07	Hisar	5.49	21.35	0
1989-02-08	Hisar	4.26	20.92	0
1989-02-09	Hisar	2.89	20.44	0
1989-02-10	Hisar	3.6	20.46	0
1989-02-11	Hisar	3.63	20.34	0
1989-02-12	Hisar	4.48	21.12	0
1989-02-13	Hisar	8.04	22.15	0
1989-02-14	Hisar	8.32	21.07	0
1989-02-15	Hisar	7.82	23.03	0
1989-02-16	Hisar	7.78	22.28	0
1989-02-17	Hisar	7.15	22.66	0
1989-02-18	Hisar	6.03	21.35	0
1989-02-19	Hisar	4.8	20.28	0
1989-02-20	Hisar	6.56	20.18	0
1989-02-21	Hisar	6.61	22.97	0
1989-02-22	Hisar	5.66	22.72	0
1989-02-23	Hisar	5.46	22.73	0
1989-02-24	Hisar	8.91	24.46	0
1989-02-25	Hisar	10.72	26.65	0
1989-02-26	Hisar	13.01	29.32	0
1989-02-27	Hisar	14.07	30.12	0
1989-02-28	Hisar	9.4	28.9	0
1989-03-01	Hisar	6.84	25.65	0
1989-03-02	Hisar	7.34	24.84	0
1989-03-03	Hisar	7.54	24.9	0
1989-03-04	Hisar	7.8	25.39	0
1989-03-05	Hisar	9.23	26.38	0
1989-03-06	Hisar	10.09	27.8	0
1989-03-07	Hisar	9.86	28.29	0
1989-03-08	Hisar	11.84	29.03	0
1989-03-09	Hisar	12.12	29.67	0
1989-03-10	Hisar	15.31	28.48	0
1989-03-11	Hisar	11.88	27.8	0
1989-03-12	Hisar	11.06	29.1	0
1989-03-13	Hisar	11.81	28.96	0
1989-03-14	Hisar	15.06	29.45	1
1989-03-15	Hisar	12.41	26.1	0
1989-03-16	Hisar	12.9	27.06	0
1989-03-17	Hisar	13.39	27.95	0
1989-03-18	Hisar	16.01	28.6	0
1989-03-19	Hisar	15.21	30.41	0
1989-03-20	Hisar	15.7	29.54	0
1989-03-21	Hisar	16.81	30.32	0
1989-03-22	Hisar	16.19	31.05	0
1989-03-23	Hisar	15.18	30.36	0
1989-03-24	Hisar	14.32	29.41	0
1989-03-25	Hisar	13.78	29.01	0
1989-03-26	Hisar	16.25	31.5	0
1989-03-27	Hisar	17.01	30.47	0
1989-03-28	Hisar	13.25	26.48	0.8
1989-03-29	Hisar	12.77	26.47	0
1989-03-30	Hisar	15.93	27.58	0
1989-03-31	Hisar	17.16	29.17	0
1989-04-01	Hisar	19.03	32.99	0
1989-04-02	Hisar	12.12	30.39	0
1989-04-03	Hisar	12.19	29.03	0
1989-04-04	Hisar	11.97	29.8	0
1989-04-05	Hisar	12.42	29.85	0
1989-04-06	Hisar	11.89	28.55	0
1989-04-07	Hisar	13.88	30.8	0
1989-04-08	Hisar	15.99	33.09	0
1989-04-09	Hisar	18.93	36.43	0
1989-04-10	Hisar	15.2	33.47	2.8
1989-04-11	Hisar	13.82	31.64	0
1989-04-12	Hisar	13.98	32.5	0
1989-04-13	Hisar	15.06	33.9	0
1989-04-14	Hisar	15.24	34.25	0
1989-04-15	Hisar	17.53	35.17	0
1989-04-16	Hisar	18.11	37.49	0
1989-04-17	Hisar	18.23	36.99	0
1989-04-18	Hisar	18.46	36.81	0
1989-04-19	Hisar	18.41	37.48	0
1989-04-20	Hisar	16.6	37.96	0
1989-04-21	Hisar	16.95	37.06	0
1989-04-22	Hisar	19.34	37.68	0
1989-04-23	Hisar	21.64	38.95	0
1989-04-24	Hisar	22.81	38.45	0
1989-04-25	Hisar	19.93	35.91	0.2
1989-04-26	Hisar	18.99	35.52	0
1989-04-27	Hisar	19.69	35.83	0
1989-04-28	Hisar	20.28	37.01	0
1989-04-29	Hisar	18.89	36.29	0
1989-04-30	Hisar	18.36	37.73	0
1989-05-01	Hisar	23.02	38.69	0.4
1989-05-02	Hisar	24.91	37.14	0
1989-05-03	Hisar	22.93	37.83	0
1989-05-04	Hisar	21.97	37.41	0
1989-05-05	Hisar	19.15	37.74	0
1989-05-06	Hisar	17.58	38.06	0
1989-05-07	Hisar	17.27	37.88	0
1989-05-08	Hisar	17.78	37.4	0
1989-05-09	Hisar	18.92	37.21	0
1989-05-10	Hisar	21.65	38.48	0
1989-05-11	Hisar	25.57	41.99	0
1989-05-12	Hisar	23.37	39.7	0
1989-05-13	Hisar	22.39	41.27	0
1989-05-14	Hisar	21.9	41.11	0
1989-05-15	Hisar	21.42	41.8	0
1989-05-16	Hisar	22.77	42.47	0
1989-05-17	Hisar	27.4	43.61	0
1989-05-18	Hisar	27.56	42.77	0
1989-05-19	Hisar	25.92	43	0
1989-05-20	Hisar	23.53	42.64	0
1989-05-21	Hisar	22.33	42.71	0
1989-05-22	Hisar	23.99	43.48	0
1989-05-23	Hisar	24.63	43.22	0
1989-05-24	Hisar	27.67	42.35	0
1989-05-25	Hisar	22.96	39.69	0
1989-05-26	Hisar	21.78	39.52	0
1989-05-27	Hisar	21.57	39.95	0
1989-05-28	Hisar	22.83	41.43	0
1989-05-29	Hisar	26.43	41.74	0
1989-05-30	Hisar	29.56	41.55	0
1989-05-31	Hisar	25.03	40.22	0
1989-06-01	Hisar	25.17	36.73	0.2
1989-06-02	Hisar	27.21	38.74	0
1989-06-03	Hisar	28.46	41.11	0
1989-06-04	Hisar	28.37	42.18	0
1989-06-05	Hisar	23.45	41.37	0
1989-06-06	Hisar	26.46	37.88	0
1989-06-07	Hisar	22.29	34.85	7.1
1989-06-08	Hisar	23.96	36.98	0.7
1989-06-09	Hisar	25.95	40.24	0
1989-06-10	Hisar	28.97	40	0
1989-06-11	Hisar	25.92	37.82	0
1989-06-12	Hisar	25.12	38.06	0
1989-06-13	Hisar	26.14	41.52	0
1989-06-14	Hisar	25.76	41.61	0
1989-06-15	Hisar	22	36.45	0
1989-06-16	Hisar	23.51	31.97	5.2
1989-06-17	Hisar	23.46	31.16	4.7
1989-06-18	Hisar	23.53	35.75	0
1989-06-19	Hisar	23.87	34.44	0
1989-06-20	Hisar	24.41	37.23	0
1989-06-21	Hisar	25.34	37.11	0
[truncated: 8,959 more rows]

## Sheet: Indore
Day	Center	Min. Temperature	Max. Temperature	Rainfall
1984-01-01	Indore	11.61	26.77	0
1984-01-02	Indore	11.92	25.22	0.5
1984-01-03	Indore	9.26	21.94	0
1984-01-04	Indore	9.31	23.24	0
1984-01-05	Indore	11.66	25.32	0
1984-01-06	Indore	9.29	25.9	0
1984-01-07	Indore	6.59	23.7	0
1984-01-08	Indore	10.87	23.92	0
1984-01-09	Indore	12.38	21.67	0
1984-01-10	Indore	14.2	22.36	0
1984-01-11	Indore	14.5	25.65	0
1984-01-12	Indore	15.14	28.88	0
1984-01-13	Indore	14.95	30	0
1984-01-14	Indore	13	28.1	0
1984-01-15	Indore	13.7	28	0
1984-01-16	Indore	9.67	27.74	0
1984-01-17	Indore	6.8	24.04	0
1984-01-18	Indore	6.69	23.73	0
1984-01-19	Indore	7.64	27.15	0
1984-01-20	Indore	8.94	26.54	0
1984-01-21	Indore	8.75	25.57	0
1984-01-22	Indore	8.76	26.28	0
1984-01-23	Indore	10.08	25.52	0
1984-01-24	Indore	10.02	25.09	0
1984-01-25	Indore	9.76	26.79	0
1984-01-26	Indore	9.13	27.4	0
1984-01-27	Indore	10.76	26.5	0
1984-01-28	Indore	10.47	25.84	0
1984-01-29	Indore	9.92	24.96	0
1984-01-30	Indore	10.3	25.6	0
1984-01-31	Indore	13.06	27.93	0
1984-02-01	Indore	15.1	30.64	0
1984-02-02	Indore	16.44	28.96	0.2
1984-02-03	Indore	12.69	26.9	0
1984-02-04	Indore	9.64	26.54	0
1984-02-05	Indore	9.59	26.56	0
1984-02-06	Indore	9.94	25.8	0
1984-02-07	Indore	12.22	27.86	0
1984-02-08	Indore	9.3	28.36	0
1984-02-09	Indore	9.22	26.14	0
1984-02-10	Indore	10.63	29.25	0
1984-02-11	Indore	10.49	29.67	0
1984-02-12	Indore	11.45	27.99	0
1984-02-13	Indore	9.76	26.93	0
1984-02-14	Indore	9.4	25.13	0
1984-02-15	Indore	10.36	26.5	0
1984-02-16	Indore	13.47	28.68	0
1984-02-17	Indore	15.38	30.7	0
1984-02-18	Indore	12.88	29.68	0
1984-02-19	Indore	11.8	28.96	0
1984-02-20	Indore	12.23	27.81	0
1984-02-21	Indore	6.73	24.52	0
1984-02-22	Indore	5.24	23.16	0
1984-02-23	Indore	5.69	23.52	0
1984-02-24	Indore	6.81	24.87	0
1984-02-25	Indore	7.6	25.2	0
1984-02-26	Indore	8.08	26.24	0
1984-02-27	Indore	9.45	28.57	0
1984-02-28	Indore	10.61	29.24	0
1984-02-29	Indore	11.25	30.61	0
1984-03-01	Indore	12.31	31	0
1984-03-02	Indore	12.73	31.98	0
1984-03-03	Indore	13.82	33.15	0
1984-03-04	Indore	14.37	33.74	0
1984-03-05	Indore	13.76	33.86	0
1984-03-06	Indore	14.39	33.38	0
1984-03-07	Indore	15.56	34.21	0
1984-03-08	Indore	16.36	35	0
1984-03-09	Indore	15.64	35.02	0
1984-03-10	Indore	14.85	35.44	0
1984-03-11	Indore	16.8	35.08	0
1984-03-12	Indore	15.33	34.65	0
1984-03-13	Indore	15.56	34.68	0
1984-03-14	Indore	15.54	34.6	0
1984-03-15	Indore	16.9	35.34	0
1984-03-16	Indore	17.3	36.32	0
1984-03-17	Indore	18.57	36.6	0
1984-03-18	Indore	19.67	36.87	0
1984-03-19	Indore	17.43	35.24	0
1984-03-20	Indore	14.54	34.09	0
1984-03-21	Indore	16.52	34.93	0
1984-03-22	Indore	17.09	36.49	0
1984-03-23	Indore	18.21	37.73	0
1984-03-24	Indore	18.9	38.49	0
1984-03-25	Indore	20.65	38.89	0
1984-03-26	Indore	20.5	37.13	0
1984-03-27	Indore	19.65	37.55	0
1984-03-28	Indore	19.23	38.09	0
1984-03-29	Indore	19.77	39.05	0
1984-03-30	Indore	20.71	39.89	0
1984-03-31	Indore	22.52	40.37	0
1984-04-01	Indore	22.18	41.26	0
1984-04-02	Indore	23.35	40.78	0
1984-04-03	Indore	23.97	40.21	0
1984-04-04	Indore	24.05	39.81	0
1984-04-05	Indore	21.94	39.71	0
1984-04-06	Indore	21.65	39.29	0
1984-04-07	Indore	21.45	38.72	0
1984-04-08	Indore	20.4	37.71	0
1984-04-09	Indore	22.74	37.78	0
1984-04-10	Indore	19.93	36.4	0
1984-04-11	Indore	17.79	35.57	0
1984-04-12	Indore	18.04	36.69	0
1984-04-13	Indore	18.65	38.06	0
1984-04-14	Indore	20.59	39.28	0
1984-04-15	Indore	22.91	40.79	0
1984-04-16	Indore	23.32	41.72	0
1984-04-17	Indore	24.97	41.93	0
1984-04-18	Indore	26.21	41.72	0
1984-04-19	Indore	25.98	41.75	0
1984-04-20	Indore	25.18	40.5	0
1984-04-21	Indore	24.33	39.72	0
1984-04-22	Indore	21.56	37.96	0
1984-04-23	Indore	21.92	37.93	0
1984-04-24	Indore	23.09	37.83	0
1984-04-25	Indore	22.54	38.71	0
1984-04-26	Indore	24.68	40.23	0
1984-04-27	Indore	24.94	40.86	0
1984-04-28	Indore	23.86	40.2	0
1984-04-29	Indore	25.58	39.47	0
1984-04-30	Indore	24.41	38.46	0
1984-05-01	Indore	24.04	38.82	0
1984-05-02	Indore	24.17	40.17	0
1984-05-03	Indore	24.95	41.08	0
1984-05-04	Indore	24.9	40.99	0
1984-05-05	Indore	25.05	41.28	0
1984-05-06	Indore	24.58	42.07	0
1984-05-07	Indore	23.84	41.5	0
1984-05-08	Indore	25.12	40.95	0
1984-05-09	Indore	26.91	41.36	0
1984-05-10	Indore	26.65	42.01	0
1984-05-11	Indore	26.66	42.05	0
1984-05-12	Indore	26.23	41.93	0
1984-05-13	Indore	26.13	40.98	0
1984-05-14	Indore	25.86	41.55	0
1984-05-15	Indore	25.18	40.87	0
1984-05-16	Indore	24.65	39.77	0
1984-05-17	Indore	24.92	40.62	0
1984-05-18	Indore	26.29	42.09	0
1984-05-19	Indore	26.21	43.2	0
1984-05-20	Indore	26.68	42.81	0
1984-05-21	Indore	26.74	41.87	0
1984-05-22	Indore	26.57	42.07	0
1984-05-23	Indore	26.44	42.21	0
1984-05-24	Indore	26.67	41.55	0
1984-05-25	Indore	26.53	41.18	0
1984-05-26	Indore	27.02	41.22	0
1984-05-27	Indore	27.22	41.63	0
1984-05-28	Indore	27.19	41.94	0
1984-05-29	Indore	26.81	41.56	0
1984-05-30	Indore	26.42	40.11	0
1984-05-31	Indore	25.98	39.98	0
1984-06-01	Indore	25.5	39.36	0
1984-06-02	Indore	25.2	38.86	0
1984-06-03	Indore	25.39	39.4	0
1984-06-04	Indore	28.35	41.08	0
1984-06-05	Indore	26.67	41.04	0
1984-06-06	Indore	26.72	39.65	0
1984-06-07	Indore	23.98	39.91	0
1984-06-08	Indore	23.76	37.77	0.3
1984-06-09	Indore	25.05	37.47	15.9
1984-06-10	Indore	23.67	36.6	0.7
1984-06-11	Indore	25.23	35.15	0
1984-06-12	Indore	25.02	34.96	0
1984-06-13	Indore	23.53	36.15	0.4
1984-06-14	Indore	24.1	34.46	12.6
1984-06-15	Indore	22.87	33.74	6.9
1984-06-16	Indore	23.38	33.81	0
1984-06-17	Indore	24.59	34.88	2.2
1984-06-18	Indore	23.63	32.67	0.3
1984-06-19	Indore	24.33	32.85	0.1
1984-06-20	Indore	23.96	34.17	0
1984-06-21	Indore	23.71	34.5	0
1984-06-22	Indore	24.19	35.05	0
1984-06-23	Indore	23.94	35.47	0
1984-06-24	Indore	23.95	35.37	0
1984-06-25	Indore	23.48	35.27	0
1984-06-26	Indore	23.68	35.35	0
1984-06-27	Indore	24.01	35.49	0
1984-06-28	Indore	23.8	34.81	0
1984-06-29	Indore	24.08	34.95	0
1984-06-30	Indore	24.29	36.26	31.7
1984-07-01	Indore	22.68	35.17	6.2
1984-07-02	Indore	23.14	32.5	7.4
1984-07-03	Indore	23.16	30.87	0
1984-07-04	Indore	23.9	33.49	3.3
1984-07-05	Indore	22.75	33.17	10.2
1984-07-06	Indore	22.15	30.32	5.1
1984-07-07	Indore	22.59	29.59	1.7
1984-07-08	Indore	22.01	29.81	2.8
1984-07-09	Indore	22.14	29.14	1.2
1984-07-10	Indore	23.06	29.61	0.5
1984-07-11	Indore	23	29.66	0.5
1984-07-12	Indore	22.98	31.96	0.9
1984-07-13	Indore	23.21	32.71	0
1984-07-14	Indore	22.9	33.7	0
1984-07-15	Indore	22.99	33.06	0
1984-07-16	Indore	22.95	32.75	0.9
1984-07-17	Indore	23.73	32.01	13.1
1984-07-18	Indore	22.66	32.01	28.7
1984-07-19	Indore	23.09	30.11	14.1
1984-07-20	Indore	22.77	29.99	1.8
1984-07-21	Indore	22.14	31.01	0
1984-07-22	Indore	22.67	30.86	1
1984-07-23	Indore	22.68	30.9	0.2
1984-07-24	Indore	22.57	31.23	0.1
1984-07-25	Indore	22.87	30.83	7.2
1984-07-26	Indore	23.35	30.46	0
1984-07-27	Indore	23.08	31.5	0
1984-07-28	Indore	22.99	30.79	0
1984-07-29	Indore	22.55	30.84	0
1984-07-30	Indore	22	31.27	0
1984-07-31	Indore	23.43	32.76	0
1984-08-01	Indore	23.79	33.4	0
1984-08-02	Indore	22.89	31.78	18.5
1984-08-03	Indore	22.57	28.61	45
1984-08-04	Indore	21.8	25	81.9
1984-08-05	Indore	22.16	25.98	6
1984-08-06	Indore	22.07	28.53	2.3
1984-08-07	Indore	22.33	28.81	2
1984-08-08	Indore	22.4	29.09	3.9
1984-08-09	Indore	22.56	27.53	6.1
1984-08-10	Indore	22.31	27.76	49.9
1984-08-11	Indore	21.25	26.59	114.4
1984-08-12	Indore	21.11	25.36	2
1984-08-13	Indore	22.37	27.48	0.2
1984-08-14	Indore	22.87	28.71	5
1984-08-15	Indore	22.6	29.41	4.2
1984-08-16	Indore	22.59	27.45	0.2
1984-08-17	Indore	22.11	26.54	9.6
1984-08-18	Indore	22.15	26.27	20.8
1984-08-19	Indore	21.57	25.55	91.7
1984-08-20	Indore	21.74	25.37	2
1984-08-21	Indore	22.04	27.36	1.2
1984-08-22	Indore	22.27	28.5	0.2
1984-08-23	Indore	21.95	27.76	0
1984-08-24	Indore	21.91	27.53	0.3
1984-08-25	Indore	21.94	27.46	1.4
1984-08-26	Indore	21.5	27.94	2.4
1984-08-27	Indore	22.06	27.15	11.7
1984-08-28	Indore	22.14	27.72	9
1984-08-29	Indore	22.23	27.94	10.8
1984-08-30	Indore	22.23	27.9	4.3
1984-08-31	Indore	21.8	27.97	0
1984-09-01	Indore	21.86	28.01	0
1984-09-02	Indore	22.25	28.22	0
1984-09-03	Indore	22.35	27.26	0
1984-09-04	Indore	21.14	27.9	0.1
1984-09-05	Indore	21.22	25.63	7
1984-09-06	Indore	20.88	25.2	3.5
1984-09-07	Indore	20.56	26.38	1.6
1984-09-08	Indore	20.78	28.32	0
1984-09-09	Indore	20.14	29.15	0
1984-09-10	Indore	20.5	30.12	0
1984-09-11	Indore	22.21	31.4	0
1984-09-12	Indore	22.67	31.96	0
1984-09-13	Indore	21.85	31.42	3.9
1984-09-14	Indore	21.38	29.8	2
1984-09-15	Indore	19.49	28.97	1.7
1984-09-16	Indore	20.7	29.6	0.4
1984-09-17	Indore	20.28	28.86	0
1984-09-18	Indore	19.51	29.06	0
1984-09-19	Indore	19.94	29.45	0
1984-09-20	Indore	19.42	30.53	0
1984-09-21	Indore	19.72	30.33	0
1984-09-22	Indore	20.39	32.25	0
1984-09-23	Indore	20.3	33.19	0
1984-09-24	Indore	20.51	33.65	0
1984-09-25	Indore	22.2	33	1.2
1984-09-26	Indore	21.41	31.87	0.2
1984-09-27	Indore	21.12	32.98	0
1984-09-28	Indore	21.1	34.44	0
1984-09-29	Indore	21.63	34.57	0.2
1984-09-30	Indore	21.91	35.04	13.3
1984-10-01	Indore	20.98	34.51	0
1984-10-02	Indore	20.99	34.64	0.7
1984-10-03	Indore	19.19	34.4	0
1984-10-04	Indore	18.94	34.54	0
1984-10-05	Indore	19.09	34.39	0
1984-10-06	Indore	20.44	34.44	0
1984-10-07	Indore	20.77	34.29	0
1984-10-08	Indore	21.74	33.91	1.1
1984-10-09	Indore	21.52	31.38	0
1984-10-10	Indore	19.45	32.03	0
1984-10-11	Indore	17.14	27.68	0
1984-10-12	Indore	16.68	31.67	0.6
1984-10-13	Indore	15.77	32.38	0
1984-10-14	Indore	16.63	32.68	0
1984-10-15	Indore	16.63	32.37	0
1984-10-16	Indore	16.03	32.27	0
1984-10-17	Indore	16.37	32.47	0
1984-10-18	Indore	16.66	32.41	0
1984-10-19	Indore	16.09	32.91	0
1984-10-20	Indore	15.91	33.71	0
1984-10-21	Indore	16.2	34.14	0
1984-10-22	Indore	15.38	34.55	0
1984-10-23	Indore	17.27	34.88	0
1984-10-24	Indore	19.04	34.74	1.1
1984-10-25	Indore	18.78	34.3	0
1984-10-26	Indore	19.17	34.3	0
1984-10-27	Indore	19.71	34.07	0
1984-10-28	Indore	17.93	33.17	0
1984-10-29	Indore	14.29	32.86	0
1984-10-30	Indore	13.96	32.72	0
1984-10-31	Indore	13.8	32.68	0
1984-11-01	Indore	13.82	32.22	0
1984-11-02	Indore	12.58	31.75	0
1984-11-03	Indore	13.37	31.37	0
1984-11-04	Indore	14.24	31.36	0
1984-11-05	Indore	14.6	31.68	0
1984-11-06	Indore	14.86	32.2	0
1984-11-07	Indore	14.24	32.14	0
1984-11-08	Indore	14.52	32	0
1984-11-09	Indore	14.89	32.59	0
1984-11-10	Indore	14.59	32.61	0
1984-11-11	Indore	14.09	32.94	0
1984-11-12	Indore	12.04	30.88	0
1984-11-13	Indore	11.46	30.88	0
1984-11-14	Indore	11.88	31.93	0
1984-11-15	Indore	11.79	32.17	0
1984-11-16	Indore	12.22	32.21	0
1984-11-17	Indore	12.3	32.46	0
1984-11-18	Indore	11.96	31.53	0
1984-11-19	Indore	11.25	31.44	0
1984-11-20	Indore	11.86	30.87	0
1984-11-21	Indore	11.64	30.74	0
1984-11-22	Indore	12.2	30.37	0
1984-11-23	Indore	12.6	30.3	0
1984-11-24	Indore	12.4	30.39	0
1984-11-25	Indore	11.8	30.11	0
1984-11-26	Indore	10.72	28.59	0
1984-11-27	Indore	8.97	27.95	0
1984-11-28	Indore	8.37	27.15	0
1984-11-29	Indore	8.82	27.67	0
1984-11-30	Indore	9.8	27.69	0
1984-12-01	Indore	10.39	26.56	0
1984-12-02	Indore	11.91	26.32	0
1984-12-03	Indore	12.47	27.89	0
1984-12-04	Indore	12.56	28.77	0
1984-12-05	Indore	12.91	29.92	0
1984-12-06	Indore	13.26	31.69	0
1984-12-07	Indore	10.78	31.02	0
1984-12-08	Indore	10.27	30.11	0
1984-12-09	Indore	9.57	28.98	0
1984-12-10	Indore	9.88	30.45	0
1984-12-11	Indore	11.26	31.33	0
1984-12-12	Indore	12.42	31.32	0
1984-12-13	Indore	12.58	31.26	0
1984-12-14	Indore	7.52	29.67	0
1984-12-15	Indore	6.92	26.9	0
1984-12-16	Indore	8.25	29.07	0
1984-12-17	Indore	8.94	30.21	0
1984-12-18	Indore	8.36	30.22	0
1984-12-19	Indore	8.15	29.47	0
1984-12-20	Indore	7.9	28.81	0
1984-12-21	Indore	8.52	28.28	0
1984-12-22	Indore	7.78	28.06	0
1984-12-23	Indore	7.9	28.24	0
1984-12-24	Indore	7.57	28.3	0
1984-12-25	Indore	7.6	28.59	0
1984-12-26	Indore	7.62	28.19	0
1984-12-27	Indore	7.98	28.24	0
1984-12-28	Indore	9.81	28.7	0
1984-12-29	Indore	10.58	27.51	0
1984-12-30	Indore	11.2	28.71	0
1984-12-31	Indore	13.62	29.35	0
1985-01-01	Indore	10.4	27.63	0
1985-01-02	Indore	9.69	24.62	0
1985-01-03	Indore	9.54	23.2	0
1985-01-04	Indore	10.62	24.75	0
1985-01-05	Indore	11.51	27.77	0
1985-01-06	Indore	10.11	26.19	0
1985-01-07	Indore	10.43	24.48	0
1985-01-08	Indore	10.05	26.25	0
1985-01-09	Indore	10.21	26.1	0
1985-01-10	Indore	10.62	26.93	0
1985-01-11	Indore	11.3	27.78	0
1985-01-12	Indore	11.62	27.81	0
1985-01-13	Indore	11.27	28.35	0
1985-01-14	Indore	11.49	27.3	0
1985-01-15	Indore	12.86	26.88	0
1985-01-16	Indore	11.33	27.86	0
1985-01-17	Indore	10.64	26.35	0
1985-01-18	Indore	11.51	27.57	0
1985-01-19	Indore	13.37	29.98	0
1985-01-20	Indore	10.15	28.14	0
1985-01-21	Indore	10.58	26	0
1985-01-22	Indore	12	27.14	0
1985-01-23	Indore	11.95	26.09	0
1985-01-24	Indore	11.33	27.46	0
1985-01-25	Indore	10.22	28.63	0
1985-01-26	Indore	10.97	29.11	0
1985-01-27	Indore	10.29	29.89	0
1985-01-28	Indore	9.63	27.41	0
1985-01-29	Indore	10.51	26.88	0
1985-01-30	Indore	11.46	28.84	0
1985-01-31	Indore	13.53	30.14	0
1985-02-01	Indore	12.04	29.39	0
1985-02-02	Indore	10.93	29.06	0
1985-02-03	Indore	10.94	29.8	0
1985-02-04	Indore	11.48	31.22	0
1985-02-05	Indore	13.32	31.96	0
1985-02-06	Indore	11.62	30.01	0
1985-02-07	Indore	9.15	28	0
1985-02-08	Indore	10.41	29.41	0
1985-02-09	Indore	11.11	29.63	0
1985-02-10	Indore	10.44	29.66	0
1985-02-11	Indore	10.88	29.8	0
1985-02-12	Indore	9.88	28.21	0
1985-02-13	Indore	9.34	28.3	0
1985-02-14	Indore	9.44	29.29	0
1985-02-15	Indore	8.29	28.7	0
1985-02-16	Indore	7.64	28.56	0
1985-02-17	Indore	9.39	29.55	0
1985-02-18	Indore	9.83	31.25	0
1985-02-19	Indore	13.02	32.54	0
1985-02-20	Indore	13.08	31.99	0
1985-02-21	Indore	10.45	30.7	0
1985-02-22	Indore	8.29	29.11	0
1985-02-23	Indore	9.96	31.45	0
1985-02-24	Indore	11.24	32.71	0
1985-02-25	Indore	11.75	33.32	0
1985-02-26	Indore	11.27	33.51	0
1985-02-27	Indore	12.15	34.56	0
1985-02-28	Indore	14.12	36.46	0
1985-03-01	Indore	16.03	35.69	0
1985-03-02	Indore	16.46	35.09	0
1985-03-03	Indore	16.81	35.77	0
1985-03-04	Indore	15.83	36.32	0
1985-03-05	Indore	16.64	36.93	0
1985-03-06	Indore	17.04	37.49	0
1985-03-07	Indore	17.4	37.42	0
1985-03-08	Indore	16.24	37.51	0
1985-03-09	Indore	16.14	37.95	0
1985-03-10	Indore	16.63	38.14	0
1985-03-11	Indore	16.81	38.05	0
1985-03-12	Indore	16.8	37.65	0
1985-03-13	Indore	17.01	38.09	0
1985-03-14	Indore	17.27	37.46	0
1985-03-15	Indore	16.29	37.38	0
1985-03-16	Indore	17.8	38.3	0
1985-03-17	Indore	18.7	38.11	0
1985-03-18	Indore	18.44	37.11	0
1985-03-19	Indore	17.16	36.02	0
1985-03-20	Indore	14.63	34.83	0
1985-03-21	Indore	16.57	35.16	0
1985-03-22	Indore	17.96	36.74	0
1985-03-23	Indore	19.43	38.16	0
1985-03-24	Indore	20.98	37.62	0
1985-03-25	Indore	20.71	36.99	0
1985-03-26	Indore	21.14	37.45	0
1985-03-27	Indore	21.43	38.18	0
1985-03-28	Indore	23.27	38.1	0
1985-03-29	Indore	24.21	38.84	0
1985-03-30	Indore	23.03	38.15	0
1985-03-31	Indore	22.59	37.53	0
1985-04-01	Indore	20.62	36.38	7
1985-04-02	Indore	19.54	34.79	0
1985-04-03	Indore	19.4	35.92	0
1985-04-04	Indore	19.66	35.4	0
1985-04-05	Indore	19.87	36	0
1985-04-06	Indore	21.33	36.88	0
1985-04-07	Indore	22.15	37.13	0
1985-04-08	Indore	23.23	37.6	0
1985-04-09	Indore	23.2	37.33	0
1985-04-10	Indore	24.15	37.81	0
1985-04-11	Indore	20.48	36.85	0
1985-04-12	Indore	21.72	37.95	0
1985-04-13	Indore	22.88	38.94	0
1985-04-14	Indore	21.12	38.48	0
1985-04-15	Indore	20.88	36.23	0
1985-04-16	Indore	20.75	37.03	0
1985-04-17	Indore	21.54	38.64	0
1985-04-18	Indore	22.51	38.97	0
1985-04-19	Indore	23.12	39.91	0
1985-04-20	Indore	23.72	40.17	0
1985-04-21	Indore	24.08	40.56	0
1985-04-22	Indore	24.53	40.5	0
1985-04-23	Indore	25.53	40.92	0
1985-04-24	Indore	24.9	40.32	0
1985-04-25	Indore	23.2	39.24	0
1985-04-26	Indore	23.88	40.26	0
1985-04-27	Indore	24.4	40.8	0
1985-04-28	Indore	24.43	40.93	0
1985-04-29	Indore	24.16	40.95	0
1985-04-30	Indore	23.45	40.78	0
1985-05-01	Indore	22.73	40	0
1985-05-02	Indore	23.95	38.29	0
1985-05-03	Indore	23.84	37.4	0
1985-05-04	Indore	23.26	36.53	0
1985-05-05	Indore	24.67	37.35	0
1985-05-06	Indore	25.04	39.18	0
1985-05-07	Indore	25.1	40.51	0
1985-05-08	Indore	26.86	41.84	0
1985-05-09	Indore	27.33	42.93	0
1985-05-10	Indore	26.45	42.63	0
1985-05-11	Indore	26.27	42.51	0
1985-05-12	Indore	26.58	41.68	0
1985-05-13	Indore	27.23	41.39	0
1985-05-14	Indore	28.18	43.45	0
1985-05-15	Indore	27.12	42.48	0
1985-05-16	Indore	26.1	42.15	0
1985-05-17	Indore	24.86	42.52	0
1985-05-18	Indore	26.31	43.13	0
1985-05-19	Indore	27.58	43.77	0
1985-05-20	Indore	27.76	43.46	0
1985-05-21	Indore	26.75	42.64	0
1985-05-22	Indore	26.62	40.97	0.3
1985-05-23	Indore	26.74	41.53	0.2
1985-05-24	Indore	26.13	40.57	0
1985-05-25	Indore	26.08	40.8	0
1985-05-26	Indore	25.96	39.55	0
1985-05-27	Indore	26.24	39.44	0
1985-05-28	Indore	25.58	39.28	0
1985-05-29	Indore	26.13	39.68	0
1985-05-30	Indore	26.67	39.55	0
1985-05-31	Indore	24.99	37.95	0
1985-06-01	Indore	25.7	37.57	0
1985-06-02	Indore	26.17	37.87	0
1985-06-03	Indore	26	36.65	0
1985-06-04	Indore	25.92	37.14	0
1985-06-05	Indore	25.96	37.7	0
1985-06-06	Indore	26.11	38.36	0
1985-06-07	Indore	23.74	37.36	14.6
1985-06-08	Indore	23.98	36.15	0
1985-06-09	Indore	24.52	34.18	0
1985-06-10	Indore	24.58	36.48	0
1985-06-11	Indore	24.52	36.7	0
1985-06-12	Indore	25.19	37.55	0
1985-06-13	Indore	26.65	38.23	0
1985-06-14	Indore	26.27	39.29	15.3
1985-06-15	Indore	23.66	38.17	8.5
1985-06-16	Indore	25.27	37.04	0
1985-06-17	Indore	25.84	38.26	0
1985-06-18	Indore	26	37.49	0
1985-06-19	Indore	25.49	37.5	0
1985-06-20	Indore	25.63	37.23	0
1985-06-21	Indore	25.55	36.7	0
1985-06-22	Indore	25.03	37.4	0
1985-06-23	Indore	25.17	37.54	0
1985-06-24	Indore	26.69	38.2	0.2
1985-06-25	Indore	25.77	38.56	1.4
1985-06-26	Indore	24.23	35.89	1.7
1985-06-27	Indore	23.1	32.31	8
1985-06-28	Indore	23.97	31.81	0
1985-06-29	Indore	23.93	34.35	0
1985-06-30	Indore	24.41	35.02	0
1985-07-01	Indore	24.28	35.46	0
1985-07-02	Indore	24.07	35.25	0
1985-07-03	Indore	24.65	35.53	0
1985-07-04	Indore	24.72	35.7	0
1985-07-05	Indore	24.52	35.96	0
1985-07-06	Indore	24.19	33.97	0
1985-07-07	Indore	23.81	32.23	0
1985-07-08	Indore	23.7	32.68	0
1985-07-09	Indore	24.23	33.29	0.2
1985-07-10	Indore	24.85	34.75	0
1985-07-11	Indore	24.52	34.8	0
1985-07-12	Indore	24.9	33.85	0
1985-07-13	Indore	23.89	33.08	0
1985-07-14	Indore	23.04	31.47	0
1985-07-15	Indore	23.31	31.44	0
1985-07-16	Indore	22.59	29.47	3.7
1985-07-17	Indore	21.94	28.57	1
1985-07-18	Indore	21.72	26.8	27.8
1985-07-19	Indore	21.69	29.33	0.6
1985-07-20	Indore	22.52	30.86	0.3
1985-07-21	Indore	23.51	32.18	0
1985-07-22	Indore	23.23	31.74	0.2
1985-07-23	Indore	23.07	31.58	32.5
1985-07-24	Indore	23.63	31.66	0
1985-07-25	Indore	23.3	30.99	4.6
1985-07-26	Indore	22.34	30.12	4.4
1985-07-27	Indore	22.17	30.4	17.7
1985-07-28	Indore	22.47	30.38	1.9
1985-07-29	Indore	22.7	29.76	8.6
1985-07-30	Indore	22.22	28.49	10.2
1985-07-31	Indore	22.05	26.86	24.2
1985-08-01	Indore	22.04	26.2	6.1
1985-08-02	Indore	22.84	30.15	2.3
1985-08-03	Indore	22.61	30.37	2.6
1985-08-04	Indore	22.31	28.03	4
1985-08-05	Indore	22.35	28.82	3.6
1985-08-06	Indore	22.31	28.29	6.3
1985-08-07	Indore	22.39	27.84	4.8
1985-08-08	Indore	22.38	27.37	2.7
1985-08-09	Indore	21.23	25.14	27.3
1985-08-10	Indore	20.82	24.91	8.3
1985-08-11	Indore	22.21	27.1	2.4
1985-08-12	Indore	23.01	29.4	3.2
1985-08-13	Indore	22.99	29.35	0.7
1985-08-14	Indore	21.99	29.44	9.1
1985-08-15	Indore	22.9	29.4	24.1
1985-08-16	Indore	22.68	28.52	2.1
1985-08-17	Indore	22.89	28.71	1.4
1985-08-18	Indore	22.45	28.77	1.2
1985-08-19	Indore	22.24	28.22	0
1985-08-20	Indore	22.15	29.31	0
1985-08-21	Indore	22.2	29.2	0
1985-08-22	Indore	22.57	28.98	0
1985-08-23	Indore	22.21	29.22	0
1985-08-24	Indore	22.29	28.94	0
1985-08-25	Indore	21.88	30.06	0
1985-08-26	Indore	21.4	29.6	0
1985-08-27	Indore	21.6	30.11	0
1985-08-28	Indore	21.68	30.57	0
1985-08-29	Indore	21.43	31.38	0
1985-08-30	Indore	22.34	31.51	0.2
1985-08-31	Indore	21.9	28.21	0
1985-09-01	Indore	22.09	28.35	0.5
1985-09-02	Indore	21.73	29.18	0
1985-09-03	Indore	22.3	29.64	9.4
1985-09-04	Indore	22.33	30.67	0
1985-09-05	Indore	21.87	29.56	0
1985-09-06	Indore	21.58	29.74	0
1985-09-07	Indore	21.14	31.18	0
1985-09-08	Indore	21.19	32.23	0
1985-09-09	Indore	21.69	32.74	0
1985-09-10	Indore	22.12	33.02	0
1985-09-11	Indore	22.71	33.45	0
1985-09-12	Indore	22.41	33.57	0
1985-09-13	Indore	22.19	32.46	5.8
1985-09-14	Indore	21.94	31.06	4.4
1985-09-15	Indore	21.69	32.25	0.9
1985-09-16	Indore	21.85	33.47	0.9
1985-09-17	Indore	22.38	33.75	0
1985-09-18	Indore	22.41	33.08	0
1985-09-19	Indore	22.38	33.63	23.5
1985-09-20	Indore	22.37	33.19	39.4
1985-09-21	Indore	21.88	33.69	0
1985-09-22	Indore	22.44	33.26	40.8
1985-09-23	Indore	21.89	30.09	62.6
1985-09-24	Indore	21.5	28.97	22.8
1985-09-25	Indore	21.44	30.21	0
1985-09-26	Indore	21.52	32.33	0
1985-09-27	Indore	21.6	33.74	0
1985-09-28	Indore	21.97	34.58	0
1985-09-29	Indore	21.9	35.25	0
1985-09-30	Indore	21.79	35.25	0
1985-10-01	Indore	20.84	35.09	0
1985-10-02	Indore	21.02	36.05	0
1985-10-03	Indore	22.4	35.49	0
1985-10-04	Indore	22.47	33.91	1.3
1985-10-05	Indore	22.01	31.35	25.1
1985-10-06	Indore	22.09	30.21	0.7
1985-10-07	Indore	22.2	30.38	10.6
1985-10-08	Indore	21.13	28.51	9.2
1985-10-09	Indore	20.71	27.32	97
1985-10-10	Indore	19.71	26.18	0.7
1985-10-11	Indore	18.68	29.35	0
1985-10-12	Indore	19.63	28.77	0
1985-10-13	Indore	19.96	26.19	3.7
1985-10-14	Indore	20.18	28.04	0.2
1985-10-15	Indore	18.58	29.87	0
1985-10-16	Indore	18.65	31.5	0
1985-10-17	Indore	17.64	31.86	0
1985-10-18	Indore	17.69	31.82	0
1985-10-19	Indore	16.37	31.84	0
1985-10-20	Indore	15.52	31.89	0
1985-10-21	Indore	15.3	31.86	0
1985-10-22	Indore	14.24	31.79	0
1985-10-23	Indore	13.56	31.24	0
1985-10-24	Indore	13.33	30.93	0
1985-10-25	Indore	13.72	30.68	0
1985-10-26	Indore	14.58	31.36	0
1985-10-27	Indore	15.07	31.56	0
1985-10-28	Indore	15.08	32.46	0
1985-10-29	Indore	14.88	32.34	0
1985-10-30	Indore	14.65	32.76	0
1985-10-31	Indore	14.68	32.52	0
1985-11-01	Indore	14.08	32.33	0
1985-11-02	Indore	13.95	32.11	0
1985-11-03	Indore	14.36	31.65	0
1985-11-04	Indore	13.6	31.4	0
1985-11-05	Indore	13.02	31.09	0
1985-11-06	Indore	13.11	31.09	0
1985-11-07	Indore	13.12	31.2	0
1985-11-08	Indore	13.94	31.75	0
1985-11-09	Indore	14.56	32.43	0
1985-11-10	Indore	15.71	32.24	0
1985-11-11	Indore	15.78	32.24	0
1985-11-12	Indore	14.44	32.39	0
1985-11-13	Indore	13.59	31.7	0
1985-11-14	Indore	13.54	30.79	0
1985-11-15	Indore	12.53	30.22	0
1985-11-16	Indore	12.86	29.84	0
1985-11-17	Indore	11.56	29.4	0
1985-11-18	Indore	11.39	29.09	0
1985-11-19	Indore	11.37	29.59	0
1985-11-20	Indore	12.82	30.26	0
1985-11-21	Indore	12.49	30.68	0
1985-11-22	Indore	12.59	30.86	0
1985-11-23	Indore	12.66	29.99	0
1985-11-24	Indore	13.79	29.51	0
1985-11-25	Indore	13.79	29.87	0
1985-11-26	Indore	15.66	30.6	0
1985-11-27	Indore	15.68	30.5	0
1985-11-28	Indore	14.2	30.53	0
1985-11-29	Indore	13.78	30.09	0
1985-11-30	Indore	12.27	29.69	0
1985-12-01	Indore	11	28.86	0
1985-12-02	Indore	10.84	28.79	0
1985-12-03	Indore	10.65	28.65	0
1985-12-04	Indore	10.37	28.58	0
1985-12-05	Indore	9.9	28.43	0
1985-12-06	Indore	10.67	29.34	0
1985-12-07	Indore	11.48	30.01	0
1985-12-08	Indore	12.33	29.91	0
1985-12-09	Indore	11.59	29.14	0
1985-12-10	Indore	12.26	28.06	0
1985-12-11	Indore	14.02	29.23	0
1985-12-12	Indore	15.79	27.53	0
1985-12-13	Indore	15.74	26.67	0
1985-12-14	Indore	14.03	29.41	0
1985-12-15	Indore	15.58	30.97	0
1985-12-16	Indore	15.69	30.92	0
1985-12-17	Indore	15.01	29.37	0
1985-12-18	Indore	14.99	30.01	0
1985-12-19	Indore	14.04	29.81	0
1985-12-20	Indore	11.4	28.58	0
1985-12-21	Indore	10.58	28.55	0
1985-12-22	Indore	9.86	28.5	0
1985-12-23	Indore	10.2	29.35	0
1985-12-24	Indore	10.26	29.07	0
1985-12-25	Indore	11.6	29.2	0
1985-12-26	Indore	13.02	29.97	0
1985-12-27	Indore	13.92	28.33	0
1985-12-28	Indore	10.32	28.37	0
1985-12-29	Indore	8.59	26.28	0
1985-12-30	Indore	8.7	27.89	0
1985-12-31	Indore	9.18	26.69	0
1986-01-01	Indore	9.02	25.4	0
1986-01-02	Indore	8.32	25.54	0
1986-01-03	Indore	8.02	23.98	0
1986-01-04	Indore	8.74	24.12	0
1986-01-05	Indore	6.6	25.01	0
1986-01-06	Indore	5.59	25.52	0
1986-01-07	Indore	7.26	27.68	0
1986-01-08	Indore	8.18	27.14	0
1986-01-09	Indore	9.19	27.02	0
1986-01-10	Indore	9.76	27.2	0
1986-01-11	Indore	10.82	28.26	0
1986-01-12	Indore	9.73	28.18	0
1986-01-13	Indore	9.87	27.45	0
1986-01-14	Indore	10.18	28.45	0
1986-01-15	Indore	10.76	28.12	0
1986-01-16	Indore	10.77	27.2	0
1986-01-17	Indore	10.11	27.36	0
1986-01-18	Indore	10.95	27.91	0
1986-01-19	Indore	11.87	27.64	0
1986-01-20	Indore	12.83	27.49	0
1986-01-21	Indore	9.97	26.28	0
1986-01-22	Indore	11.35	27.9	0
1986-01-23	Indore	11.68	29.09	0
1986-01-24	Indore	12.02	29.13	0
1986-01-25	Indore	13.63	29.58	0
1986-01-26	Indore	12.17	30.23	0
1986-01-27	Indore	11.54	28.89	0
1986-01-28	Indore	13.95	29.76	0
1986-01-29	Indore	12.39	29.8	0
1986-01-30	Indore	12.12	29.67	0
1986-01-31	Indore	11.94	28.37	0
1986-02-01	Indore	10.54	26.02	0
1986-02-02	Indore	10.62	26.81	0
1986-02-03	Indore	11.67	28.83	0
1986-02-04	Indore	12.32	30.45	0
1986-02-05	Indore	13.61	29.25	0
1986-02-06	Indore	11.71	27.53	0
1986-02-07	Indore	12.69	28.3	0
1986-02-08	Indore	13.18	27.58	0.2
1986-02-09	Indore	13.55	28.32	5.6
1986-02-10	Indore	11.78	27.13	0.2
1986-02-11	Indore	11.31	27.07	0
1986-02-12	Indore	12.5	28.48	0
1986-02-13	Indore	12.9	29.74	0
1986-02-14	Indore	11.87	29.02	0
1986-02-15	Indore	10.7	28.32	0
1986-02-16	Indore	11.17	27.79	0
1986-02-17	Indore	11.94	27.83	0
1986-02-18	Indore	12.77	28.44	0
1986-02-19	Indore	13.7	29.77	0
1986-02-20	Indore	15.07	31.3	0
1986-02-21	Indore	14.72	31.72	0
1986-02-22	Indore	14.18	31.19	0
1986-02-23	Indore	12.39	29.45	0
1986-02-24	Indore	12.94	28.08	0
1986-02-25	Indore	13.76	29.13	0
1986-02-26	Indore	14.39	29.09	0
1986-02-27	Indore	15.26	31.07	0
1986-02-28	Indore	14.83	30.9	0.2
1986-03-01	Indore	13.46	31.39	0
1986-03-02	Indore	14.4	31.62	0
1986-03-03	Indore	14.76	31.31	0
1986-03-04	Indore	16.11	32.03	0
1986-03-05	Indore	16.32	32.6	0
1986-03-06	Indore	16.67	33.7	0
1986-03-07	Indore	16.27	33.89	0
1986-03-08	Indore	17.4	34.23	0
1986-03-09	Indore	18.9	35.75	0
1986-03-10	Indore	18.97	36.24	0
1986-03-11	Indore	18.74	36.98	0
1986-03-12	Indore	16.18	35.41	0
1986-03-13	Indore	15.45	34.7	0
1986-03-14	Indore	18.1	36.18	0
1986-03-15	Indore	17.49	35.74	0
1986-03-16	Indore	13.17	33.23	0
1986-03-17	Indore	13.97	33.05	0
1986-03-18	Indore	15.78	35.96	0
1986-03-19	Indore	17.25	35.8	0
1986-03-20	Indore	14.45	33.96	0
1986-03-21	Indore	14.39	33.03	0
1986-03-22	Indore	18.37	35.27	0
1986-03-23	Indore	17.18	35.26	0
1986-03-24	Indore	15.63	34.18	0
1986-03-25	Indore	16.23	33.91	0
1986-03-26	Indore	17.4	34.51	0
1986-03-27	Indore	18.91	35.29	0
1986-03-28	Indore	18.35	38.44	0
1986-03-29	Indore	19.97	40.14	0
1986-03-30	Indore	19.91	38.45	0
1986-03-31	Indore	16.36	36.22	0
1986-04-01	Indore	17.1	34.73	0
1986-04-02	Indore	18.22	35.38	0
1986-04-03	Indore	18.5	36.42	0
1986-04-04	Indore	19.65	37.4	0
1986-04-05	Indore	17.73	37.72	0
1986-04-06	Indore	18.81	37.96	0
1986-04-07	Indore	19.51	39.21	0
1986-04-08	Indore	22.73	40.24	0
1986-04-09	Indore	23.03	40.86	0
1986-04-10	Indore	22.91	40.37	0
1986-04-11	Indore	23.78	39.47	0
1986-04-12	Indore	23.68	40.32	0
1986-04-13	Indore	24.59	41.13	0
1986-04-14	Indore	25.13	41.22	0
1986-04-15	Indore	24.42	40.93	0
1986-04-16	Indore	23.45	41.04	0
1986-04-17	Indore	23.28	40.93	0
1986-04-18	Indore	24.18	40.5	0
1986-04-19	Indore	23.01	40.17	0
1986-04-20	Indore	23.8	40.19	0
1986-04-21	Indore	23.72	41.16	0
1986-04-22	Indore	24.97	41.73	0
1986-04-23	Indore	25.32	41.65	0
1986-04-24	Indore	25.36	40.93	0
1986-04-25	Indore	25.29	39.87	0
1986-04-26	Indore	22.95	40.07	0
1986-04-27	Indore	22.35	39.21	0
1986-04-28	Indore	22.66	38.97	0
1986-04-29	Indore	22.88	38.35	0
1986-04-30	Indore	25.29	39.24	0
1986-05-01	Indore	24.5	40.39	0
1986-05-02	Indore	25.1	41.74	0
1986-05-03	Indore	25.51	41.81	0
1986-05-04	Indore	24.54	40.92	0
1986-05-05	Indore	23.2	40.54	0
1986-05-06	Indore	25.78	41.13	0
1986-05-07	Indore	24.9	41.63	0
1986-05-08	Indore	25.02	41.77	0
1986-05-09	Indore	25.07	41.51	0.9
1986-05-10	Indore	24.78	39.95	4.2
1986-05-11	Indore	24.75	39.65	0
1986-05-12	Indore	25.3	39.59	0
1986-05-13	Indore	25.72	40.64	0
1986-05-14	Indore	25.55	41.93	0
1986-05-15	Indore	25.05	42.13	0
1986-05-16	Indore	24.29	41.32	0
1986-05-17	Indore	24.88	40.97	0
1986-05-18	Indore	25.79	40.49	0
1986-05-19	Indore	25.55	40.42	0
1986-05-20	Indore	25.91	39.39	0
1986-05-21	Indore	24.28	39.56	0
1986-05-22	Indore	23.93	39.86	0
1986-05-23	Indore	23.11	40.62	0
1986-05-24	Indore	23.98	41.03	0
1986-05-25	Indore	24.7	40.51	0
1986-05-26	Indore	23.49	39.64	0
1986-05-27	Indore	22.85	39.41	0
1986-05-28	Indore	24.03	38.15	0
1986-05-29	Indore	23.1	39.01	0
1986-05-30	Indore	23.9	37.63	0
1986-05-31	Indore	24.64	38.22	0
1986-06-01	Indore	25.13	38.73	0
1986-06-02	Indore	26.52	39.78	0.1
1986-06-03	Indore	26.76	40.87	0
1986-06-04	Indore	26.46	40.66	0.4
1986-06-05	Indore	27.41	39.46	0
1986-06-06	Indore	27.91	40.25	0
1986-06-07	Indore	27.91	41.43	0
1986-06-08	Indore	27.61	41.44	0
1986-06-09	Indore	28.31	42.04	0
1986-06-10	Indore	27.77	43.17	0
1986-06-11	Indore	26.88	41.43	0
1986-06-12	Indore	26.34	40.54	0
1986-06-13	Indore	26.63	40.34	0
1986-06-14	Indore	26.01	39.3	0.3
1986-06-15	Indore	24.66	39.84	1.7
1986-06-16	Indore	25.38	39.17	0
1986-06-17	Indore	25.1	40.05	0
1986-06-18	Indore	23.87	37.88	2.9
1986-06-19	Indore	24.14	36.45	0.2
1986-06-20	Indore	24.35	31.22	0
1986-06-21	Indore	23.66	32.28	1.2
1986-06-22	Indore	22.84	29.6	3
1986-06-23	Indore	23.21	29.01	1.5
1986-06-24	Indore	23.74	28.8	1.7
1986-06-25	Indore	22.74	30.36	0
1986-06-26	Indore	22.96	28.82	0
1986-06-27	Indore	23.12	29.26	0
1986-06-28	Indore	23.66	29.86	0
1986-06-29	Indore	23.4	31.59	0
1986-06-30	Indore	23.06	32.26	0
1986-07-01	Indore	23.33	32.22	3.2
1986-07-02	Indore	23.62	33.1	0
1986-07-03	Indore	24.21	32.83	0.6
1986-07-04	Indore	24.64	33.76	0
1986-07-05	Indore	24.41	34.18	0
1986-07-06	Indore	25.03	34.11	0
1986-07-07	Indore	24.59	32.26	0.8
1986-07-08	Indore	24.2	31.22	7.1
1986-07-09	Indore	24.22	30.6	0
1986-07-10	Indore	23.35	29.4	0
1986-07-11	Indore	23.73	31.34	0
1986-07-12	Indore	23.64	32.39	0
1986-07-13	Indore	25.02	34.13	0
1986-07-14	Indore	22.76	32.84	40.9
1986-07-15	Indore	23.32	28.23	24.9
1986-07-16	Indore	22.97	27.92	3.3
1986-07-17	Indore	23.17	28.73	9.7
1986-07-18	Indore	22.92	29.29	12.8
1986-07-19	Indore	23.48	27.86	2
1986-07-20	Indore	22.79	27.97	9.8
1986-07-21	Indore	22.9	28.66	11.1
1986-07-22	Indore	22.57	26.47	12.5
1986-07-23	Indore	22.58	25.92	40.1
1986-07-24	Indore	22.41	24.54	78.2
1986-07-25	Indore	22.11	25.58	17.9
1986-07-26	Indore	22.26	27.67	7.3
1986-07-27	Indore	21.5	26.45	5.7
1986-07-28	Indore	21.51	25.29	2.4
1986-07-29	Indore	21.06	26.89	3.8
1986-07-30	Indore	21.54	29.3	1.6
1986-07-31	Indore	22.04	28.66	3.3
1986-08-01	Indore	22.56	28.87	0.7
1986-08-02	Indore	22.52	30.07	2.8
1986-08-03	Indore	22.31	30.51	0
1986-08-04	Indore	22.85	30.43	1.6
1986-08-05	Indore	23.06	29.93	9.5
1986-08-06	Indore	22.65	29.53	26.1
1986-08-07	Indore	22.67	27.09	32.9
1986-08-08	Indore	23.32	29.42	5.4
1986-08-09	Indore	23.23	29.71	3.8
1986-08-10	Indore	22.87	29.47	5.2
1986-08-11	Indore	22.65	27.82	3.1
1986-08-12	Indore	23.36	30.46	6.6
1986-08-13	Indore	22.92	29.12	9.1
1986-08-14	Indore	22.49	26.82	32.6
1986-08-15	Indore	21.57	26.12	92.9
1986-08-16	Indore	21.78	24.53	77.2
1986-08-17	Indore	21.99	25.93	6.7
1986-08-18	Indore	22.05	26.89	4
1986-08-19	Indore	21.9	27.64	2.3
1986-08-20	Indore	22.14	27.3	3.5
1986-08-21	Indore	22.06	28.56	0
1986-08-22	Indore	21.61	28.14	0
1986-08-23	Indore	22.1	28.34	0
1986-08-24	Indore	21.6	29.68	0
1986-08-25	Indore	20.88	29.21	0
1986-08-26	Indore	21.01	29.45	0
1986-08-27	Indore	20.39	30.08	0
1986-08-28	Indore	20.63	29.61	0
1986-08-29	Indore	20.97	30.23	0
1986-08-30	Indore	21.7	30.34	0
1986-08-31	Indore	21.37	30.71	0.3
1986-09-01	Indore	21.25	30.13	0
1986-09-02	Indore	21.42	31.53	1.7
1986-09-03	Indore	21.05	32.28	0
1986-09-04	Indore	20.97	31.29	0
1986-09-05	Indore	21.07	30.52	0
1986-09-06	Indore	21.09	31.12	0
1986-09-07	Indore	22.12	31.85	0
1986-09-08	Indore	21.88	32.2	0
1986-09-09	Indore	21.24	32.25	0
1986-09-10	Indore	20.85	31.7	0
1986-09-11	Indore	21.72	31.77	0
1986-09-12	Indore	21.29	32.09	0
1986-09-13	Indore	21.29	31.81	0
1986-09-14	Indore	20.5	31.73	0
1986-09-15	Indore	20.15	32.17	0
1986-09-16	Indore	21.19	33.21	0
1986-09-17	Indore	22.72	34.46	0
1986-09-18	Indore	23.57	35.27	0
1986-09-19	Indore	22.35	34.6	0.7
1986-09-20	Indore	22.13	34.14	7.4
1986-09-21	Indore	22.4	33.72	3.2
1986-09-22	Indore	22.26	34.51	0.6
1986-09-23	Indore	22.75	34.8	0
1986-09-24	Indore	21.84	35.23	0
1986-09-25	Indore	22.35	34.87	0
1986-09-26	Indore	21.74	34.83	5.6
1986-09-27	Indore	21.31	33.88	0
1986-09-28	Indore	20.89	34.13	1.2
1986-09-29	Indore	20.58	34.39	23.1
1986-09-30	Indore	21.76	33.97	2.1
1986-10-01	Indore	21.44	34.6	0.1
1986-10-02	Indore	21.1	34.26	0.5
1986-10-03	Indore	20.72	34.57	0
1986-10-04	Indore	20.39	34.61	0
1986-10-05	Indore	20.61	34.3	0
1986-10-06	Indore	20.67	34.79	0
1986-10-07	Indore	20.87	34.48	0
1986-10-08	Indore	21.4	35.39	0
1986-10-09	Indore	20.8	36.09	0
1986-10-10	Indore	20.3	36.25	0
1986-10-11	Indore	20.28	35.72	0
1986-10-12	Indore	20.56	36.22	0
1986-10-13	Indore	20.36	36.71	0
1986-10-14	Indore	18.62	37.22	0
1986-10-15	Indore	19.52	36.71	0
1986-10-16	Indore	19.08	36.73	0
1986-10-17	Indore	19.09	35.67	0
1986-10-18	Indore	18.22	34.3	0
1986-10-19	Indore	18.79	34.3	0
1986-10-20	Indore	19.2	35.31	0
1986-10-21	Indore	18.74	35.3	0
1986-10-22	Indore	17.36	34.78	0
1986-10-23	Indore	16.13	34.38	0
1986-10-24	Indore	15.78	33.88	0
1986-10-25	Indore	15.15	33.45	0
1986-10-26	Indore	14.5	33.16	0
1986-10-27	Indore	14.58	32.5	0
1986-10-28	Indore	14.7	33.08	0
1986-10-29	Indore	15.46	33.94	0
1986-10-30	Indore	15.35	34.57	0
1986-10-31	Indore	15.97	34.58	0
1986-11-01	Indore	17.89	34.02	0
1986-11-02	Indore	17.69	33.67	0
1986-11-03	Indore	19.21	32.92	0
1986-11-04	Indore	19.41	32.79	0
1986-11-05	Indore	18.39	32.66	0
1986-11-06	Indore	17.49	32.23	0
1986-11-07	Indore	17.11	31.59	0
1986-11-08	Indore	16.43	32.39	0
1986-11-09	Indore	15.54	31.7	0
1986-11-10	Indore	13.95	31.42	0
1986-11-11	Indore	14.09	33.41	0
1986-11-12	Indore	14.37	34.04	0
1986-11-13	Indore	13.59	32.98	0
1986-11-14	Indore	14.43	32.73	0
1986-11-15	Indore	14.33	33.26	0
1986-11-16	Indore	14.93	32.94	0
1986-11-17	Indore	14.88	32.56	0
1986-11-18	Indore	13.74	31.36	0
1986-11-19	Indore	13.3	30.97	0
1986-11-20	Indore	12.11	31.33	0
1986-11-21	Indore	11.22	30.2	0
1986-11-22	Indore	11.46	31.18	0
1986-11-23	Indore	12.47	31.72	0
1986-11-24	Indore	12.12	31.93	0
1986-11-25	Indore	12.34	31.71	0
1986-11-26	Indore	13.06	31.28	0
1986-11-27	Indore	13.57	31.67	0
1986-11-28	Indore	13.69	31.41	0
1986-11-29	Indore	13.93	30.53	0
1986-11-30	Indore	14.12	30.11	0
1986-12-01	Indore	13.44	29.62	0
1986-12-02	Indore	13.48	29.78	0
1986-12-03	Indore	12.34	29.22	0
1986-12-04	Indore	11.1	29.68	0
1986-12-05	Indore	10.26	30.34	0
1986-12-06	Indore	9.63	29.98	0
1986-12-07	Indore	9.84	30.24	0
1986-12-08	Indore	10.18	29.65	0
1986-12-09	Indore	11.03	30.28	0
1986-12-10	Indore	12.31	30.59	0
1986-12-11	Indore	13.87	30.67	0
1986-12-12	Indore	12.02	30.46	0
1986-12-13	Indore	13.62	29.2	0
1986-12-14	Indore	9.53	26.22	0
1986-12-15	Indore	8.55	24.79	0
1986-12-16	Indore	9.74	25.38	0
1986-12-17	Indore	9.72	24.52	0
1986-12-18	Indore	11.19	25.15	0
1986-12-19	Indore	10.52	25.01	0
1986-12-20	Indore	10.04	24.52	0
1986-12-21	Indore	10.9	24.36	0
1986-12-22	Indore	11.66	28.22	0
1986-12-23	Indore	11.41	28.95	0
1986-12-24	Indore	11.89	26.96	0
1986-12-25	Indore	10.24	25.74	0
1986-12-26	Indore	10.45	24.24	0
1986-12-27	Indore	11.2	24.47	0
1986-12-28	Indore	10.43	23.05	0
1986-12-29	Indore	8.04	24.3	0
1986-12-30	Indore	7.78	25.81	0
1986-12-31	Indore	7.56	25.99	0
1987-01-01	Indore	6.59	25.7	0
1987-01-02	Indore	7.91	26.49	0
1987-01-03	Indore	9.72	27.66	0
1987-01-04	Indore	11.04	28.91	0
1987-01-05	Indore	11.82	29.22	0
1987-01-06	Indore	13.06	29.35	0
1987-01-07	Indore	13.3	28.89	0.2
1987-01-08	Indore	14.44	28.02	0.3
1987-01-09	Indore	12.57	24.55	0.4
1987-01-10	Indore	11.92	24.66	0
1987-01-11	Indore	13.14	24.2	1.4
1987-01-12	Indore	11.75	24.19	0
1987-01-13	Indore	11.74	22.68	0
1987-01-14	Indore	14.03	24.69	0
1987-01-15	Indore	14.3	24.63	0
1987-01-16	Indore	15.77	25.44	0.2
1987-01-17	Indore	15.8	28.04	0
1987-01-18	Indore	11.71	25.42	0
1987-01-19	Indore	13.13	24.42	0
1987-01-20	Indore	12.27	26.26	0
1987-01-21	Indore	10.93	24.88	0
1987-01-22	Indore	12.4	25.87	0
1987-01-23	Indore	13.5	28.2	0
1987-01-24	Indore	12.07	28.39	0
1987-01-25	Indore	9.39	27.63	0
1987-01-26	Indore	9.62	28.3	0
1987-01-27	Indore	8.65	29.02	0
1987-01-28	Indore	9.04	29.34	0
1987-01-29	Indore	9.5	30.15	0
1987-01-30	Indore	10.83	30.79	0
1987-01-31	Indore	11.67	31.14	0
1987-02-01	Indore	11.78	31.06	0
1987-02-02	Indore	11.75	30.24	0
1987-02-03	Indore	11.97	29.47	0
1987-02-04	Indore	11.19	28.2	0
1987-02-05	Indore	10.75	27.88	0
1987-02-06	Indore	9.17	28.17	0
1987-02-07	Indore	10.21	29.39	0
1987-02-08	Indore	11.05	29.99	0
1987-02-09	Indore	11.87	30.89	0
1987-02-10	Indore	11.13	30.99	0
1987-02-11	Indore	11.27	30.44	0
1987-02-12	Indore	11.74	31.28	0
1987-02-13	Indore	13	32.75	0
1987-02-14	Indore	15.61	32.72	0
1987-02-15	Indore	16.44	32.65	0
1987-02-16	Indore	14.31	31.57	0
1987-02-17	Indore	13.24	30.61	0
1987-02-18	Indore	15.06	30.83	0
1987-02-19	Indore	16.08	31.61	0
1987-02-20	Indore	17.22	31.99	0.2
1987-02-21	Indore	15.58	31.85	0.8
1987-02-22	Indore	15.58	31.69	1.5
1987-02-23	Indore	16.78	32.7	0
1987-02-24	Indore	16.86	33.19	0.4
1987-02-25	Indore	14.12	31.29	0
1987-02-26	Indore	15.31	30.77	0
1987-02-27	Indore	13.22	30.14	0
1987-02-28	Indore	12.72	29.28	0
1987-03-01	Indore	12.44	30.1	0
1987-03-02	Indore	13.25	30.81	0
1987-03-03	Indore	15.58	31.53	0
1987-03-04	Indore	13.83	32.36	0
1987-03-05	Indore	15.28	33.48	0
1987-03-06	Indore	17.08	34.43	0
1987-03-07	Indore	18.93	35.44	0
1987-03-08	Indore	17.28	34.45	0
1987-03-09	Indore	16.07	34.12	0
1987-03-10	Indore	16.9	33.55	0
1987-03-11	Indore	18.13	33.73	0
1987-03-12	Indore	15.53	31.88	1.9
1987-03-13	Indore	17.25	30.82	0
1987-03-14	Indore	17.09	32.81	0
1987-03-15	Indore	17.91	34.35	0
1987-03-16	Indore	20.6	36.12	0
1987-03-17	Indore	20.09	35.12	0
1987-03-18	Indore	17.25	34.82	0
1987-03-19	Indore	18.41	35.24	0
1987-03-20	Indore	19.35	35.39	0
1987-03-21	Indore	18.91	34.66	0
1987-03-22	Indore	20.24	35.47	0
1987-03-23	Indore	19.35	37.02	0
1987-03-24	Indore	20.08	37.49	0
1987-03-25	Indore	21.63	38.28	0
1987-03-26	Indore	24.32	38.45	0
1987-03-27	Indore	19.21	36.66	0
1987-03-28	Indore	17.76	36.61	0
1987-03-29	Indore	19.85	37.67	0
1987-03-30	Indore	20.7	38.08	0
1987-03-31	Indore	22.45	37.99	0
1987-04-01	Indore	23.31	38.67	0
1987-04-02	Indore	21.22	37.76	0
1987-04-03	Indore	22.19	37.62	0
1987-04-04	Indore	21.91	37.74	0
1987-04-05	Indore	22.26	37.66	0
1987-04-06	Indore	21.74	38.64	0
1987-04-07	Indore	21.59	39.07	0
1987-04-08	Indore	22.16	39.03	0
1987-04-09	Indore	23.52	37.67	0
1987-04-10	Indore	21.66	35.32	0
1987-04-11	Indore	21.55	35.8	0
1987-04-12	Indore	20.85	35.37	0
1987-04-13	Indore	21.98	36.03	0
1987-04-14	Indore	20.27	37.7	0
1987-04-15	Indore	19.91	38.29	0
1987-04-16	Indore	21.15	39.89	0
1987-04-17	Indore	21.95	41.16	0
1987-04-18	Indore	22.05	40.83	0
1987-04-19	Indore	22.03	41.68	0
1987-04-20	Indore	23.27	42.6	0
1987-04-21	Indore	24.74	42.55	0
1987-04-22	Indore	25.11	42.56	0
1987-04-23	Indore	25.62	42.86	0
1987-04-24	Indore	24.5	41.49	0
1987-04-25	Indore	23.67	39.3	0
1987-04-26	Indore	22.69	38.01	0
1987-04-27	Indore	23.04	39.09	0
1987-04-28	Indore	23.04	40.44	0
1987-04-29	Indore	23.51	41.05	0
1987-04-30	Indore	26.1	41.91	0
1987-05-01	Indore	24.13	40.48	0
1987-05-02	Indore	23.74	38.17	0
1987-05-03	Indore	23.67	37.12	0
1987-05-04	Indore	23.46	36.51	0
1987-05-05	Indore	23.84	38.01	0
1987-05-06	Indore	25.07	39.14	0
1987-05-07	Indore	24.8	39.35	0
1987-05-08	Indore	25.04	38.49	0
1987-05-09	Indore	24.47	38.93	0.3
1987-05-10	Indore	24.47	38.35	0
1987-05-11	Indore	24.69	38.89	0
1987-05-12	Indore	25.75	39.59	0
1987-05-13	Indore	23.99	39.69	0
1987-05-14	Indore	25.42	40.07	0
1987-05-15	Indore	22.7	38.96	0.4
1987-05-16	Indore	23.87	38.32	0.1
1987-05-17	Indore	24.75	39.02	0
1987-05-18	Indore	26.78	40.59	0
1987-05-19	Indore	26.44	41.08	0
1987-05-20	Indore	26.98	41.71	0
1987-05-21	Indore	27.42	41.69	0
1987-05-22	Indore	27.42	41.81	0
1987-05-23	Indore	28.53	41.09	0
1987-05-24	Indore	26.37	39.54	0
1987-05-25	Indore	27.13	41.42	0
1987-05-26	Indore	26.09	40.95	0
1987-05-27	Indore	24.63	41.48	0
1987-05-28	Indore	23.63	39.26	2.7
1987-05-29	Indore	24.18	38.17	0
1987-05-30	Indore	23.42	39.06	0.2
1987-05-31	Indore	25.89	39.86	0
1987-06-01	Indore	27.88	41.66	0
1987-06-02	Indore	28.55	42.36	0
1987-06-03	Indore	29.13	41.88	0
1987-06-04	Indore	27	41.95	0
1987-06-05	Indore	27.88	40.4	0
1987-06-06	Indore	28.43	42.12	7.5
1987-06-07	Indore	25.83	41.44	2.8
1987-06-08	Indore	26.46	40.01	0
1987-06-09	Indore	23.16	38.48	0
1987-06-10	Indore	25.16	37.09	0
1987-06-11	Indore	25.81	37.84	1.8
1987-06-12	Indore	25.88	37.6	0
1987-06-13	Indore	23.39	36.2	0.2
1987-06-14	Indore	24.69	35.53	28.1
1987-06-15	Indore	25.28	37.57	0
1987-06-16	Indore	23	37.13	1.5
1987-06-17	Indore	23.22	34.11	55.2
1987-06-18	Indore	23.51	32.89	0.4
1987-06-19	Indore	24.07	35.26	0
1987-06-20	Indore	25.17	38.08	0
1987-06-21	Indore	24.83	37.65	0
1987-06-22	Indore	25.34	37.54	0
1987-06-23	Indore	25.23	37.92	0
1987-06-24	Indore	25.25	37.75	0
1987-06-25	Indore	26.27	37.75	0
1987-06-26	Indore	25.83	38.73	4.2
1987-06-27	Indore	24.94	38.41	0
1987-06-28	Indore	25.23	38.35	1.8
1987-06-29	Indore	24.73	38.14	0
1987-06-30	Indore	25.13	35.76	0
1987-07-01	Indore	26.21	36.45	0
1987-07-02	Indore	24.98	35.78	28.3
1987-07-03	Indore	24.71	33.78	17.4
1987-07-04	Indore	23.19	32.82	0.6
1987-07-05	Indore	23.38	30.91	2.7
1987-07-06	Indore	24.11	33	0
1987-07-07	Indore	24.24	32.8	6.3
1987-07-08	Indore	22.56	31.76	96.3
1987-07-09	Indore	22.32	32.67	0.3
1987-07-10	Indore	24.32	33.45	0
1987-07-11	Indore	24.56	33.95	0
1987-07-12	Indore	23.88	34.04	0
1987-07-13	Indore	24.5	33.58	3.6
1987-07-14	Indore	23.77	30.06	0.2
1987-07-15	Indore	23.37	30.94	0
1987-07-16	Indore	22.94	32.23	0
1987-07-17	Indore	23.3	32.55	3.9
1987-07-18	Indore	23.65	31.62	0
1987-07-19	Indore	24.57	33.48	0
1987-07-20	Indore	25.11	34.28	0
1987-07-21	Indore	24.57	34.43	0
1987-07-22	Indore	24.42	35	0
1987-07-23	Indore	25.04	35.07	0
1987-07-24	Indore	25.08	34.82	1
1987-07-25	Indore	24.68	34.89	0
1987-07-26	Indore	24.92	34.31	0.9
1987-07-27	Indore	24.76	33.37	0.1
1987-07-28	Indore	25.14	34.52	0
1987-07-29	Indore	25.2	34.84	0
1987-07-30	Indore	25.31	34.83	0
1987-07-31	Indore	25.14	34.29	0
1987-08-01	Indore	25.06	34.58	0
1987-08-02	Indore	24.86	34.45	0
1987-08-03	Indore	25.29	35.04	0
1987-08-04	Indore	25.06	34.73	0
1987-08-05	Indore	24.24	35.82	0
1987-08-06	Indore	22.57	33.89	12.4
1987-08-07	Indore	22.49	29.04	15
1987-08-08	Indore	23	28.73	18.5
1987-08-09	Indore	23.21	29.47	7.5
1987-08-10	Indore	23.9	32.76	2.2
1987-08-11	Indore	24.43	33.85	0
1987-08-12	Indore	24.41	32.35	0
1987-08-13	Indore	23.19	31.41	0.4
1987-08-14	Indore	23.82	32.94	0.2
1987-08-15	Indore	23.45	34.12	4.5
1987-08-16	Indore	24.09	33.78	0.5
1987-08-17	Indore	24.44	34.58	0
1987-08-18	Indore	24.4	35.15	0.5
1987-08-19	Indore	23.23	35.89	0.5
1987-08-20	Indore	22.96	32.76	0
1987-08-21	Indore	21.94	30.98	32.6
1987-08-22	Indore	23.16	31.28	6.9
1987-08-23	Indore	23.36	31.95	1
1987-08-24	Indore	22.5	30.53	70.2
1987-08-25	Indore	22.75	27.99	46
1987-08-26	Indore	22.59	25.81	30.8
1987-08-27	Indore	22.81	25.4	21.2
1987-08-28	Indore	22.61	28.28	0.6
1987-08-29	Indore	22.55	26.51	3
1987-08-30	Indore	21.91	25.25	24.8
1987-08-31	Indore	21.56	25.21	21.8
1987-09-01	Indore	22.19	25.6	0.6
1987-09-02	Indore	22.29	28.41	0.1
1987-09-03	Indore	22.28	29.66	0
1987-09-04	Indore	22.27	29.89	0
1987-09-05	Indore	22.59	30.92	0
1987-09-06	Indore	22.61	30.67	0
1987-09-07	Indore	22.62	30.1	0.5
1987-09-08	Indore	22.93	30.14	0
1987-09-09	Indore	22.6	29.7	0
1987-09-10	Indore	23.14	31.15	0
1987-09-11	Indore	22.62	31.13	0
1987-09-12	Indore	22.08	32.2	0
1987-09-13	Indore	22.77	33.26	0.5
1987-09-14	Indore	23.37	33.19	0.3
1987-09-15	Indore	22.98	33.54	7.1
1987-09-16	Indore	22.97	33.05	0
1987-09-17	Indore	22.72	32.67	0
1987-09-18	Indore	22.63	30.41	0
1987-09-19	Indore	23.08	33.76	0
1987-09-20	Indore	22.91	35.28	0
1987-09-21	Indore	23.23	35.45	0
1987-09-22	Indore	22.47	34.88	0
1987-09-23	Indore	22.63	34.59	0
1987-09-24	Indore	22.49	34.92	1.5
1987-09-25	Indore	22.97	36.06	0
1987-09-26	Indore	23.32	36.85	0
1987-09-27	Indore	23.85	37.44	0
1987-09-28	Indore	22.86	35.52	0
1987-09-29	Indore	22.98	35.41	0
1987-09-30	Indore	22.27	36.37	0
1987-10-01	Indore	21.86	36.68	0
1987-10-02	Indore	21.62	37.03	0
1987-10-03	Indore	21.87	36.7	0
1987-10-04	Indore	21.54	32.1	0
1987-10-05	Indore	19.27	32.07	0
1987-10-06	Indore	21.08	32.45	0
1987-10-07	Indore	20.57	33.77	0
1987-10-08	Indore	19.88	34.32	0
1987-10-09	Indore	20.38	35.09	0
1987-10-10	Indore	20.36	36.7	0
1987-10-11	Indore	20.26	37.24	0
1987-10-12	Indore	20.15	37.1	0
1987-10-13	Indore	21.17	37.74	0
1987-10-14	Indore	21.39	37.56	0
1987-10-15	Indore	21.18	37.24	0
1987-10-16	Indore	20.8	37.35	0
1987-10-17	Indore	22.97	35.45	0
1987-10-18	Indore	22.54	32.01	18.3
1987-10-19	Indore	20.72	28.59	31.3
1987-10-20	Indore	19.82	31.53	0
1987-10-21	Indore	17.78	32.34	0
1987-10-22	Indore	16.62	32.5	0
1987-10-23	Indore	15.91	33.1	0
1987-10-24	Indore	15.95	33.47	0
1987-10-25	Indore	16.32	33.81	0
1987-10-26	Indore	16.51	34.03	0
1987-10-27	Indore	16.6	33.96	0
1987-10-28	Indore	16.87	34.2	0
1987-10-29	Indore	16.82	34.13	0
1987-10-30	Indore	17.64	35.43	0
1987-10-31	Indore	17.91	35.59	0
1987-11-01	Indore	16.66	35.38	0
1987-11-02	Indore	15.82	34.6	0
1987-11-03	Indore	16.29	33.43	0
1987-11-04	Indore	15.53	31.28	0
1987-11-05	Indore	16.66	31.21	0
1987-11-06	Indore	17.73	32.23	0
1987-11-07	Indore	14.4	31.92	0
1987-11-08	Indore	14.09	32.87	0
1987-11-09	Indore	13.5	32.17	0
1987-11-10	Indore	13.54	30.5	0
1987-11-11	Indore	13.27	30.9	0
1987-11-12	Indore	13.7	31.14	0
1987-11-13	Indore	15.22	30.95	0
1987-11-14	Indore	15.31	28.93	0
1987-11-15	Indore	15.11	30.64	0
1987-11-16	Indore	13.84	30.7	0
1987-11-17	Indore	15.24	31.63	0
1987-11-18	Indore	18.34	32.44	0
1987-11-19	Indore	18.46	30.1	25.3
1987-11-20	Indore	14.67	28.45	0
1987-11-21	Indore	13.89	30.03	0
1987-11-22	Indore	13.09	30.49	0
1987-11-23	Indore	12.52	31.19	0
1987-11-24	Indore	12.74	31.47	0
1987-11-25	Indore	14.3	32.22	0
1987-11-26	Indore	14.55	32.34	0
1987-11-27	Indore	14.5	32.4	0
1987-11-28	Indore	13.8	32.2	0
1987-11-29	Indore	14.38	31.1	0
1987-11-30	Indore	14.74	31.71	0
1987-12-01	Indore	14.72	31.96	0
1987-12-02	Indore	13.92	32.18	0
1987-12-03	Indore	13.5	31.95	0
1987-12-04	Indore	13.62	30.65	0
1987-12-05	Indore	13.27	29.77	0
1987-12-06	Indore	12.76	29.17	0
1987-12-07	Indore	11.37	29.07	0
1987-12-08	Indore	10.08	28.39	0
1987-12-09	Indore	10.94	28.24	0
1987-12-10	Indore	12.73	28.65	0
1987-12-11	Indore	16.9	28.5	0
1987-12-12	Indore	15.24	29.2	16.5
1987-12-13	Indore	11.81	22.95	0
1987-12-14	Indore	9.24	22.83	0
1987-12-15	Indore	9.3	25.12	0
1987-12-16	Indore	9.03	26.38	0
1987-12-17	Indore	9.32	26.17	0
1987-12-18	Indore	8.96	25.99	0
1987-12-19	Indore	8.86	26.85	0
1987-12-20	Indore	8.97	27.13	0
1987-12-21	Indore	8.67	24.89	0
1987-12-22	Indore	10.31	25.39	0
1987-12-23	Indore	9.51	26.96	0
1987-12-24	Indore	9.91	27.45	0
1987-12-25	Indore	10.48	27.88	0
1987-12-26	Indore	11.24	28.55	0
1987-12-27	Indore	10.92	28.02	0
1987-12-28	Indore	10.74	27.85	0
1987-12-29	Indore	9.86	27.51	0
1987-12-30	Indore	10.1	27.77	0
1987-12-31	Indore	10.96	28.81	0
1988-01-01	Indore	10.76	28.2	0
1988-01-02	Indore	11.26	28.2	0
1988-01-03	Indore	11.27	28.24	0
1988-01-04	Indore	10.39	25.89	0
1988-01-05	Indore	10.51	25.88	0
1988-01-06	Indore	10.94	28.67	0
1988-01-07	Indore	10.42	28.25	0
1988-01-08	Indore	10.56	27.92	0
1988-01-09	Indore	11.61	28.3	0
1988-01-10	Indore	11.69	28.76	0
1988-01-11	Indore	12.79	29.09	0
1988-01-12	Indore	14.05	29.71	0
1988-01-13	Indore	13.95	29.08	0
1988-01-14	Indore	12.92	28.54	0
1988-01-15	Indore	12.45	27.96	0
1988-01-16	Indore	13.2	28.99	0
1988-01-17	Indore	12.98	28.19	0
1988-01-18	Indore	12.25	28.72	0
1988-01-19	Indore	11.68	29.94	0
1988-01-20	Indore	11.51	29.84	0
1988-01-21	Indore	11.47	30.71	0
1988-01-22	Indore	11.96	29.95	0
1988-01-23	Indore	13.01	28.38	0
1988-01-24	Indore	13.23	30.61	0
1988-01-25	Indore	11.36	30.43	0
1988-01-26	Indore	9.78	27.72	0
1988-01-27	Indore	9.92	26.38	0
1988-01-28	Indore	11.24	27.76	0
1988-01-29	Indore	11.68	30.56	0
1988-01-30	Indore	11.17	31.39	0
1988-01-31	Indore	11.38	31.38	0
1988-02-01	Indore	11.79	30.89	0
1988-02-02	Indore	12.38	31.31	0
1988-02-03	Indore	10.88	30.13	0
1988-02-04	Indore	10.28	30.91	0
1988-02-05	Indore	11.58	32.3	0
1988-02-06	Indore	11.76	32.1	0
1988-02-07	Indore	12.76	32.28	0
1988-02-08	Indore	12.89	32.26	0
1988-02-09	Indore	11.97	31.01	0
1988-02-10	Indore	12.24	31.81	0
1988-02-11	Indore	14.25	33.1	0
1988-02-12	Indore	15.53	32.25	0
1988-02-13	Indore	14.69	30.72	0
1988-02-14	Indore	15.58	31.3	0
1988-02-15	Indore	14.04	31.46	0
1988-02-16	Indore	14.84	30.41	0
1988-02-17	Indore	15.04	30.35	0
1988-02-18	Indore	14.71	29.75	0
1988-02-19	Indore	15.51	31.9	0
1988-02-20	Indore	15.05	32.52	0
1988-02-21	Indore	16.39	33.9	0
1988-02-22	Indore	16.74	34.38	0
1988-02-23	Indore	15.61	33.14	0
1988-02-24	Indore	14.34	31.5	0
1988-02-25	Indore	12.64	30.25	0
1988-02-26	Indore	13.39	31.62	0
1988-02-27	Indore	15.3	33.65	0
1988-02-28	Indore	17.17	33.85	0
1988-02-29	Indore	14.95	32.43	0
1988-03-01	Indore	15.15	31.24	0
1988-03-02	Indore	15.74	30.98	0
1988-03-03	Indore	14.99	31.52	0
1988-03-04	Indore	15.04	32.73	0
1988-03-05	Indore	16.48	34.66	0
1988-03-06	Indore	17.05	34.93	0
1988-03-07	Indore	18.68	34.86	0
1988-03-08	Indore	19.8	35.68	0
1988-03-09	Indore	18.21	35.98	0
1988-03-10	Indore	19.3	35.04	0
1988-03-11	Indore	19.72	36.11	0
1988-03-12	Indore	20.88	37.28	0
1988-03-13	Indore	19.6	36.76	0
1988-03-14	Indore	17.73	34.67	0
1988-03-15	Indore	18.22	34.95	0
1988-03-16	Indore	19.58	37.43	0
1988-03-17	Indore	20.84	38.03	0
1988-03-18	Indore	19.87	36.78	0
1988-03-19	Indore	17.58	35.53	0
1988-03-20	Indore	14.93	32.86	0
1988-03-21	Indore	14.17	32.71	0
1988-03-22	Indore	15.26	34.38	0
1988-03-23	Indore	16.38	35.1	0
1988-03-24	Indore	16.93	36.22	0
1988-03-25	Indore	18.63	37.31	0
1988-03-26	Indore	19.77	35.53	0
1988-03-27	Indore	17.26	33.56	0
1988-03-28	Indore	15.29	33.54	0
1988-03-29	Indore	15.11	34.56	0
1988-03-30	Indore	17.4	36.69	0
1988-03-31	Indore	18.44	37.29	0
1988-04-01	Indore	20.19	37.13	0
1988-04-02	Indore	20.35	38.33	0
1988-04-03	Indore	21.3	39.97	0
1988-04-04	Indore	22.19	40.67	0
1988-04-05	Indore	21.93	39.87	0
1988-04-06	Indore	22.47	39.94	0
1988-04-07	Indore	23.15	40.65	0
1988-04-08	Indore	23.92	40.55	0
1988-04-09	Indore	23.11	38.69	0
1988-04-10	Indore	24.48	41.06	0
1988-04-11	Indore	24.65	41.76	0
1988-04-12	Indore	26.22	41.48	0
1988-04-13	Indore	25.99	42.59	0
1988-04-14	Indore	24.77	41.81	0
1988-04-15	Indore	25.33	41.86	0
1988-04-16	Indore	24.46	41.02	0
1988-04-17	Indore	25.07	41.2	0
1988-04-18	Indore	24.52	41.2	0
1988-04-19	Indore	24.2	40.58	0
1988-04-20	Indore	22.86	39.21	0
1988-04-21	Indore	23.44	37.36	0
1988-04-22	Indore	24.01	39.46	0
1988-04-23	Indore	24.52	38.79	0
1988-04-24	Indore	23.06	39.62	0
1988-04-25	Indore	22.82	38.55	0
1988-04-26	Indore	25.04	38.99	0
1988-04-27	Indore	24.45	39.77	0
1988-04-28	Indore	24.79	40.54	0
1988-04-29	Indore	24.08	40.32	0
1988-04-30	Indore	23.9	39.16	0
1988-05-01	Indore	24.63	39.08	0
1988-05-02	Indore	24.97	39.31	0
1988-05-03	Indore	23.66	39.73	0
1988-05-04	Indore	24.51	39.46	0
1988-05-05	Indore	25.56	41.01	0
1988-05-06	Indore	26.24	42.25	0
1988-05-07	Indore	26.5	42.65	0
1988-05-08	Indore	28.36	43.52	0
1988-05-09	Indore	28.8	44.51	0
1988-05-10	Indore	27.93	44.65	0
1988-05-11	Indore	27.99	43.79	0
1988-05-12	Indore	27.51	42.53	0
1988-05-13	Indore	27.19	42.09	0
1988-05-14	Indore	27.94	42.15	0
1988-05-15	Indore	28.38	42.43	0
1988-05-16	Indore	27.57	43.34	0
1988-05-17	Indore	27.23	43.03	0
1988-05-18	Indore	26.64	42.19	0
1988-05-19	Indore	27.32	40.79	0
1988-05-20	Indore	27.34	40.36	0
1988-05-21	Indore	25.33	40.21	0
1988-05-22	Indore	27.37	40.65	0
1988-05-23	Indore	27.07	41.04	0
1988-05-24	Indore	27.08	41.23	0
1988-05-25	Indore	27.1	41.39	0
1988-05-26	Indore	27.41	42.44	0
1988-05-27	Indore	27.82	42.65	0
1988-05-28	Indore	29.02	42.79	0
1988-05-29	Indore	28.43	42.82	0
1988-05-30	Indore	27.89	41.58	0
1988-05-31	Indore	27.63	40.82	0
1988-06-01	Indore	27.38	40.29	0
1988-06-02	Indore	27.7	39.46	0
1988-06-03	Indore	27.74	40.16	0
1988-06-04	Indore	26.96	41.15	0
1988-06-05	Indore	27.05	40.89	0
1988-06-06	Indore	24.42	39.95	0
1988-06-07	Indore	25.74	39.38	0
1988-06-08	Indore	27	40.14	0
1988-06-09	Indore	27.63	42.14	0
1988-06-10	Indore	28.41	42.57	0
1988-06-11	Indore	29.27	42.15	3.2
1988-06-12	Indore	27.59	42.11	0
1988-06-13	Indore	25.74	41.24	0
1988-06-14	Indore	22.64	38.25	6.3
1988-06-15	Indore	25.25	35.52	0
1988-06-16	Indore	22.99	36.32	23.5
1988-06-17	Indore	23.74	31.64	0.5
1988-06-18	Indore	23.06	34.99	14.2
1988-06-19	Indore	24.83	33.19	0.5
1988-06-20	Indore	23.61	36.31	6
1988-06-21	Indore	24.74	36.18	6.4
1988-06-22	Indore	23.74	36.32	2
1988-06-23	Indore	23.79	34.1	6.5
1988-06-24	Indore	25.09	35.32	2.7
1988-06-25	Indore	24.81	35.21	0
1988-06-26	Indore	25.52	36.29	0
1988-06-27	Indore	25.2	35.65	0
1988-06-28	Indore	24.23	33.62	2.3
1988-06-29	Indore	22.63	28.93	5.1
1988-06-30	Indore	23.21	29.99	2.6
1988-07-01	Indore	23.31	30.1	4.4
1988-07-02	Indore	24.76	33.26	0
1988-07-03	Indore	24.52	34.14	3.7
1988-07-04	Indore	23.69	33.63	6.3
1988-07-05	Indore	24.07	31.39	7.2
1988-07-06	Indore	22.63	30.91	44.5
1988-07-07	Indore	22.91	30.58	1.1
1988-07-08	Indore	23.73	29.99	0.6
1988-07-09	Indore	24.51	32.48	0
1988-07-10	Indore	23.71	32.74	18.8
1988-07-11	Indore	23.7	30.8	22.6
1988-07-12	Indore	23.8	30.83	1.4
1988-07-13	Indore	23.68	31.31	5.8
1988-07-14	Indore	22.29	28.98	12.6
1988-07-15	Indore	22.82	27.51	5.5
1988-07-16	Indore	23.34	28.77	0.4
1988-07-17	Indore	23.75	30.54	0.2
1988-07-18	Indore	24.08	32.13	0
1988-07-19	Indore	23.33	31.86	54.7
1988-07-20	Indore	23.21	28.24	27.4
1988-07-21	Indore	24.14	30.5	0.1
1988-07-22	Indore	22.76	28.51	11.7
1988-07-23	Indore	22.71	26.75	6
1988-07-24	Indore	23.43	29.68	5.6
1988-07-25	Indore	23.4	30.43	5.4
1988-07-26	Indore	23.22	29.86	1.6
1988-07-27	Indore	21.01	28.07	13.1
1988-07-28	Indore	22.38	28.54	167
1988-07-29	Indore	23.3	28.87	55.9
1988-07-30	Indore	23.51	29.72	4.8
1988-07-31	Indore	23.25	29.2	2.3
1988-08-01	Indore	22.89	29.34	1.6
1988-08-02	Indore	23.4	28.82	7.2
1988-08-03	Indore	23.71	29.03	0.4
1988-08-04	Indore	23.64	28.32	14.3
1988-08-05	Indore	22.17	26.54	63.3
1988-08-06	Indore	22.28	27.25	0.5
1988-08-07	Indore	22.78	29.52	1.8
1988-08-08	Indore	22.72	29.62	0
1988-08-09	Indore	23.05	29.94	0.1
1988-08-10	Indore	23.06	29.84	3.3
1988-08-11	Indore	23.3	29.84	8.1
1988-08-12	Indore	23.26	29.83	1
1988-08-13	Indore	23.45	30.36	0
1988-08-14	Indore	23.37	30.96	0
1988-08-15	Indore	22.81	31.04	0
1988-08-16	Indore	22.72	31.17	0
1988-08-17	Indore	23.07	31.35	0
1988-08-18	Indore	23.79	32.13	8.1
1988-08-19	Indore	22.82	29.4	11.1
1988-08-20	Indore	23.15	29.49	14.7
1988-08-21	Indore	23.43	29.52	4
1988-08-22	Indore	23.44	28.81	11.4
1988-08-23	Indore	23.95	28.35	1.1
1988-08-24	Indore	23.15	28.37	6.5
1988-08-25	Indore	22.9	28.85	5.3
1988-08-26	Indore	23.4	29.6	0.4
1988-08-27	Indore	23.45	30.42	3.3
1988-08-28	Indore	23.27	31.17	0.4
1988-08-29	Indore	23.35	30.77	0
1988-08-30	Indore	23.68	31.77	0.4
1988-08-31	Indore	23.46	31.92	4
1988-09-01	Indore	23.54	31.96	13.1
1988-09-02	Indore	22.97	32.59	0.6
1988-09-03	Indore	23.78	33.1	0
1988-09-04	Indore	23.96	33.07	0
1988-09-05	Indore	24.23	33.55	0
1988-09-06	Indore	23.79	32.34	0
1988-09-07	Indore	23.8	32.18	0
1988-09-08	Indore	23.8	32.12	0
1988-09-09	Indore	23.02	32.28	0
1988-09-10	Indore	23.09	32.86	0
1988-09-11	Indore	22.18	31.7	4.8
1988-09-12	Indore	23.1	32.64	0
1988-09-13	Indore	24.18	34.04	0
1988-09-14	Indore	24.45	34.44	4.7
1988-09-15	Indore	23.57	33.87	0
1988-09-16	Indore	22.11	32.9	8.5
1988-09-17	Indore	22.19	31.91	0.6
1988-09-18	Indore	23.15	31.93	0
1988-09-19	Indore	23.48	31.83	0
1988-09-20	Indore	22.86	31.8	29.9
1988-09-21	Indore	23.4	30.51	18.5
1988-09-22	Indore	23.6	29.96	8.4
1988-09-23	Indore	24.06	30.32	3.7
1988-09-24	Indore	23.81	31.05	18.5
1988-09-25	Indore	23.43	29.13	15.8
1988-09-26	Indore	23.6	31.72	0
1988-09-27	Indore	23.31	32.77	0
1988-09-28	Indore	23.57	32.61	0
1988-09-29	Indore	22.71	31.96	19.2
1988-09-30	Indore	22.75	30.67	3.2
1988-10-01	Indore	22.86	32.01	9.6
1988-10-02	Indore	22.65	32.41	11.7
1988-10-03	Indore	22.56	30.83	24.1
1988-10-04	Indore	22.02	27.05	27.7
1988-10-05	Indore	22.56	28.75	0.2
1988-10-06	Indore	19.81	31.5	0
1988-10-07	Indore	18.85	30.67	0
1988-10-08	Indore	19.16	29.75	0
1988-10-09	Indore	19.52	29.85	0
1988-10-10	Indore	19	30.43	0
1988-10-11	Indore	19.55	31.86	0
1988-10-12	Indore	16.46	32.3	0
1988-10-13	Indore	17.45	33.12	0
1988-10-14	Indore	19.24	33.66	0
1988-10-15	Indore	19.56	34.28	0
1988-10-16	Indore	19.14	34.21	0
1988-10-17	Indore	19.45	34.19	0
1988-10-18	Indore	18.4	33.95	0
1988-10-19	Indore	19.3	33.8	0
1988-10-20	Indore	19.88	33.48	0
1988-10-21	Indore	19.24	33.75	0
1988-10-22	Indore	16.95	34.05	0
1988-10-23	Indore	15.9	33.61	0
1988-10-24	Indore	15.91	34.3	0
1988-10-25	Indore	15.86	34.6	0
1988-10-26	Indore	15.84	34.36	0
1988-10-27	Indore	16.23	34.51	0
1988-10-28	Indore	16.06	34.33	0
1988-10-29	Indore	15.67	33.95	0
1988-10-30	Indore	15	33.03	0
1988-10-31	Indore	16.13	32.52	0
1988-11-01	Indore	15.13	32.59	0
1988-11-02	Indore	16.31	32.85	0
1988-11-03	Indore	17.16	32.36	0
1988-11-04	Indore	16.76	31.93	0
1988-11-05	Indore	15.09	30.73	0
1988-11-06	Indore	13.97	31.92	0
1988-11-07	Indore	13.63	31.62	0
1988-11-08	Indore	12.73	31.81	0
1988-11-09	Indore	12.98	31.86	0
1988-11-10	Indore	13.29	32.57	0
1988-11-11	Indore	13.04	32.92	0
1988-11-12	Indore	12.8	31.64	0
1988-11-13	Indore	12.81	31.33	0
1988-11-14	Indore	12.73	31.04	0
1988-11-15	Indore	12.34	30.61	0
1988-11-16	Indore	12.77	31.12	0
1988-11-17	Indore	12.1	30.82	0
1988-11-18	Indore	12.59	31.22	0
1988-11-19	Indore	12.12	31.2	0
1988-11-20	Indore	12.47	31.01	0
1988-11-21	Indore	11.9	30.75	0
1988-11-22	Indore	12.23	30.23	0
1988-11-23	Indore	13.94	29.87	0
1988-11-24	Indore	15.03	30.21	0
1988-11-25	Indore	15.28	30.2	0
1988-11-26	Indore	15.49	30.56	0
1988-11-27	Indore	14.4	28.82	0
1988-11-28	Indore	12.75	28.41	0
1988-11-29	Indore	11.35	27.57	0
1988-11-30	Indore	9.87	26.09	0
1988-12-01	Indore	8.3	26.48	0
1988-12-02	Indore	9.92	27.41	0
1988-12-03	Indore	10.98	28.45	0
1988-12-04	Indore	10.91	29.4	0
1988-12-05	Indore	9.99	29.21	0
1988-12-06	Indore	9.74	28.38	0
1988-12-07	Indore	9.85	28.18	0
1988-12-08	Indore	11.79	28.97	0
1988-12-09	Indore	11.2	29.53	0
1988-12-10	Indore	10.43	29.67	0
1988-12-11	Indore	10.61	29.57	0
1988-12-12	Indore	11.15	28.66	0
1988-12-13	Indore	13.68	28.07	0
1988-12-14	Indore	9.73	27.09	0
1988-12-15	Indore	10.34	29.15	0
1988-12-16	Indore	10.34	30.33	0
1988-12-17	Indore	11.2	30.24	0
1988-12-18	Indore	11.99	30.31	0
1988-12-19	Indore	12.42	29.67	0
1988-12-20	Indore	12.43	29.65	0
1988-12-21	Indore	11.79	29.72	0
1988-12-22	Indore	11.4	29.57	0
1988-12-23	Indore	11.36	29.54	0
1988-12-24	Indore	11.69	29.22	0
1988-12-25	Indore	12.92	29.15	0
1988-12-26	Indore	11.24	26.8	0
1988-12-27	Indore	9.82	24.74	0
1988-12-28	Indore	8.1	24.01	0
1988-12-29	Indore	8.72	24.94	0
1988-12-30	Indore	8.38	26.32	0
1988-12-31	Indore	8.97	28.62	0
1989-01-01	Indore	9.74	28.91	0
1989-01-02	Indore	11.57	29.61	0
1989-01-03	Indore	9.96	29	0
1989-01-04	Indore	7.72	24.57	0
1989-01-05	Indore	8.92	26.48	0
1989-01-06	Indore	11.27	29.36	0
1989-01-07	Indore	13.35	29.31	0
1989-01-08	Indore	12.95	27.68	0
1989-01-09	Indore	6.57	23.49	0
1989-01-10	Indore	5.9	21.98	0
1989-01-11	Indore	5.76	24.31	0
1989-01-12	Indore	5.81	23.39	0
1989-01-13	Indore	7.2	24.17	0
1989-01-14	Indore	9.22	28.12	0
1989-01-15	Indore	9.31	27.98	0
1989-01-16	Indore	8.5	27.79	0
1989-01-17	Indore	8.62	26.22	0
1989-01-18	Indore	8.98	26.5	0
1989-01-19	Indore	8.96	27.85	0
1989-01-20	Indore	8.99	26.3	0
1989-01-21	Indore	9.02	25.73	0
1989-01-22	Indore	8.97	25.12	0
1989-01-23	Indore	7.15	25.99	0
1989-01-24	Indore	6.99	26.37	0
1989-01-25	Indore	7.08	27.71	0
1989-01-26	Indore	9.01	28.92	0
1989-01-27	Indore	9.62	29.68	0
1989-01-28	Indore	9.25	29.02	0
1989-01-29	Indore	9.31	28.82	0
1989-01-30	Indore	9.91	30.51	0
1989-01-31	Indore	10.9	31.78	0
1989-02-01	Indore	12.27	32.68	0
1989-02-02	Indore	11.2	31.63	0
1989-02-03	Indore	10.87	32.05	0
1989-02-04	Indore	11.04	33.46	0
1989-02-05	Indore	12.08	32.34	0
1989-02-06	Indore	13.28	31.07	0
1989-02-07	Indore	12.69	29.6	0
1989-02-08	Indore	10.42	29.09	0
1989-02-09	Indore	10.46	28.45	0
1989-02-10	Indore	10.24	28.19	0
1989-02-11	Indore	10.88	28.52	0
1989-02-12	Indore	9.55	26.94	0
1989-02-13	Indore	11.32	29.1	0
1989-02-14	Indore	13.68	30.56	0
1989-02-15	Indore	14.14	30.38	0
1989-02-16	Indore	14.94	30.29	0
1989-02-17	Indore	13.21	29.47	0
1989-02-18	Indore	13.3	29.09	0
1989-02-19	Indore	7.43	27.26	0
1989-02-20	Indore	7.68	24.62	0
1989-02-21	Indore	9.65	29.29	0
1989-02-22	Indore	11.19	30.23	0
1989-02-23	Indore	11.16	29.15	0
1989-02-24	Indore	11.86	30.31	0
1989-02-25	Indore	13.41	32.53	0
1989-02-26	Indore	14.14	34.51	0
1989-02-27	Indore	15.51	35.82	0
1989-02-28	Indore	15.04	34.76	0
1989-03-01	Indore	14.85	34.22	0
1989-03-02	Indore	11.77	32.98	0
1989-03-03	Indore	12.8	32.88	0
1989-03-04	Indore	14.04	32.96	0
1989-03-05	Indore	14.89	32.81	0
1989-03-06	Indore	16.41	33.51	0
1989-03-07	Indore	18.05	34.12	0
1989-03-08	Indore	17.88	34.19	0
1989-03-09	Indore	17.63	33.66	0
1989-03-10	Indore	17.37	33.63	0
1989-03-11	Indore	15.09	32.85	0
1989-03-12	Indore	15.02	33.37	0
1989-03-13	Indore	15.44	32.92	0
1989-03-14	Indore	16.56	34	0
1989-03-15	Indore	17.37	33.6	0
1989-03-16	Indore	17.92	34.32	0
1989-03-17	Indore	16.95	34.05	0
1989-03-18	Indore	18.92	35.31	0
1989-03-19	Indore	18.84	36.6	0
1989-03-20	Indore	20.58	37.87	0
1989-03-21	Indore	22.07	38.45	0
1989-03-22	Indore	22.48	37.38	0
1989-03-23	Indore	19.8	35.59	0
1989-03-24	Indore	18.16	35.01	0
1989-03-25	Indore	20.13	33.74	0
1989-03-26	Indore	17.16	31.35	0
1989-03-27	Indore	15.89	28.06	0
1989-03-28	Indore	14.76	28.87	0
1989-03-29	Indore	14.94	30.8	0
1989-03-30	Indore	16.46	32.71	0
1989-03-31	Indore	18.55	34.71	0
1989-04-01	Indore	20.69	37.19	0
1989-04-02	Indore	18.81	36.71	0
1989-04-03	Indore	16.76	36.15	0
1989-04-04	Indore	16.98	34.87	0
1989-04-05	Indore	15.12	34.9	0
1989-04-06	Indore	16.21	34.73	0
1989-04-07	Indore	17.36	36.81	0
1989-04-08	Indore	18.05	38.77	0
1989-04-09	Indore	20.6	40.23	0
1989-04-10	Indore	22.44	39.86	0
1989-04-11	Indore	19.2	37.85	0
1989-04-12	Indore	18.93	36.97	0
1989-04-13	Indore	20.56	38.44	0
1989-04-14	Indore	21.03	39.54	0
1989-04-15	Indore	22.62	40.57	0
1989-04-16	Indore	22.4	40.83	0
1989-04-17	Indore	22.13	39	0
1989-04-18	Indore	22.54	40.11	0
1989-04-19	Indore	24.46	41.23	0
1989-04-20	Indore	23	40.97	0
1989-04-21	Indore	23.09	41.96	0
1989-04-22	Indore	24.12	41.58	0
1989-04-23	Indore	24.34	41.43	0
1989-04-24	Indore	25.13	39.59	0
1989-04-25	Indore	24.58	39.38	0
1989-04-26	Indore	23.94	39.56	0
1989-04-27	Indore	24.23	40.11	0
1989-04-28	Indore	25.31	40.08	0
1989-04-29	Indore	25.09	39.26	0
1989-04-30	Indore	25.11	39.64	0
1989-05-01	Indore	26.48	39.62	0
1989-05-02	Indore	25.1	39.79	0
1989-05-03	Indore	24.43	39.73	0
1989-05-04	Indore	22.35	38.79	0
1989-05-05	Indore	24.21	38.08	0
1989-05-06	Indore	23.94	39.04	0
1989-05-07	Indore	21.82	39.76	0
1989-05-08	Indore	20.73	40.82	0
1989-05-09	Indore	21.14	40.93	0
1989-05-10	Indore	24.48	42.11	0
1989-05-11	Indore	25.74	43.4	0
1989-05-12	Indore	25.98	43.76	0
1989-05-13	Indore	26.93	44.04	0
1989-05-14	Indore	27.8	43.75	0
1989-05-15	Indore	27.36	43.14	0
1989-05-16	Indore	27.8	44.02	0
1989-05-17	Indore	27.55	44.04	0
1989-05-18	Indore	27.36	43.89	0
1989-05-19	Indore	26.94	44.12	0
1989-05-20	Indore	27.17	44.13	0
1989-05-21	Indore	26.85	44.25	0
1989-05-22	Indore	27.71	44.54	0
1989-05-23	Indore	26.72	42.87	0
1989-05-24	Indore	26.47	40.91	0
1989-05-25	Indore	25.29	40.04	0
1989-05-26	Indore	25.38	40.23	0
1989-05-27	Indore	25.46	39.95	0
1989-05-28	Indore	26.35	40.87	0
1989-05-29	Indore	26.17	39.59	0
1989-05-30	Indore	25.29	38.98	0
1989-05-31	Indore	25.12	38.17	1.5
1989-06-01	Indore	24.69	37.72	2.1
1989-06-02	Indore	26.24	39.16	0
1989-06-03	Indore	25.98	39.76	1.1
1989-06-04	Indore	26.04	39.24	0
1989-06-05	Indore	24.93	38.88	3.1
1989-06-06	Indore	26.24	38.47	4.8
1989-06-07	Indore	23.11	39.43	0
1989-06-08	Indore	25.37	36.94	0
1989-06-09	Indore	24.82	38.32	0
1989-06-10	Indore	24.09	36.71	0
1989-06-11	Indore	25.41	36.05	29.7
1989-06-12	Indore	25.21	36.58	0
1989-06-13	Indore	23.41	36.27	10.2
1989-06-14	Indore	23.96	32.75	0
1989-06-15	Indore	23.78	35.14	0
1989-06-16	Indore	23.17	34.8	0
1989-06-17	Indore	23.41	31.73	2.5
1989-06-18	Indore	24.29	33.37	25.2
1989-06-19	Indore	24.25	34.54	3.6
1989-06-20	Indore	23.88	34.47	6.4
1989-06-21	Indore	23.85	34.2	0
[truncated: 8,959 more rows]

## Sheet: Jabalpur
Day	Center	Min. Temperature	Max. Temperature	Rainfall
1984-01-01	Jabalpur	9.11	24.4	3.1
1984-01-02	Jabalpur	10.77	20.26	9.7
1984-01-03	Jabalpur	9.21	17.27	8.5
1984-01-04	Jabalpur	7.59	19.59	0
1984-01-05	Jabalpur	10.46	22.38	0
1984-01-06	Jabalpur	11.72	22.64	7.2
1984-01-07	Jabalpur	10	23.61	0
1984-01-08	Jabalpur	10.95	22.54	0
1984-01-09	Jabalpur	11.72	19.39	2.3
1984-01-10	Jabalpur	13.37	21.6	2.2
1984-01-11	Jabalpur	12.8	23	0
1984-01-12	Jabalpur	13.59	25.56	0
1984-01-13	Jabalpur	14.31	27.85	0
1984-01-14	Jabalpur	14.66	26.74	0
1984-01-15	Jabalpur	14.92	25.96	0
1984-01-16	Jabalpur	14.7	25.63	20.3
1984-01-17	Jabalpur	9	23.29	0
1984-01-18	Jabalpur	7.04	20.89	0
1984-01-19	Jabalpur	9.07	24.13	0
1984-01-20	Jabalpur	9.72	25.5	0
1984-01-21	Jabalpur	9.14	24.7	0
1984-01-22	Jabalpur	10.7	24.19	0
1984-01-23	Jabalpur	9.87	24.78	0
1984-01-24	Jabalpur	8.42	23.3	0
1984-01-25	Jabalpur	9.74	23.5	0
1984-01-26	Jabalpur	10.77	24.09	0
1984-01-27	Jabalpur	10.43	24.17	0
1984-01-28	Jabalpur	9.96	22.15	0
1984-01-29	Jabalpur	8.59	22.26	0
1984-01-30	Jabalpur	8.14	22.17	0
1984-01-31	Jabalpur	9.51	23.69	0
1984-02-01	Jabalpur	12.98	27.24	0
1984-02-02	Jabalpur	16.04	28.44	0
1984-02-03	Jabalpur	17.18	27.5	0.2
1984-02-04	Jabalpur	13.26	26.78	0
1984-02-05	Jabalpur	10.1	25.65	0
1984-02-06	Jabalpur	8.18	22.53	0
1984-02-07	Jabalpur	10.02	23.77	0
1984-02-08	Jabalpur	11.93	20.23	11.1
1984-02-09	Jabalpur	9.39	21.82	0
1984-02-10	Jabalpur	10.33	25.08	0
1984-02-11	Jabalpur	12.23	27.56	0
1984-02-12	Jabalpur	12.03	25.73	0
1984-02-13	Jabalpur	9.68	22.55	0
1984-02-14	Jabalpur	9.53	22.21	0
1984-02-15	Jabalpur	8.94	23.47	0
1984-02-16	Jabalpur	10.96	25.63	8.8
1984-02-17	Jabalpur	15.25	27.95	3.3
1984-02-18	Jabalpur	15.07	23.35	0
1984-02-19	Jabalpur	16.42	26.73	0
1984-02-20	Jabalpur	14.28	27.89	0
1984-02-21	Jabalpur	11.65	27.04	0
1984-02-22	Jabalpur	8.11	24.03	0
1984-02-23	Jabalpur	5.95	20.33	0
1984-02-24	Jabalpur	6.21	21.65	0
1984-02-25	Jabalpur	5.87	22.07	0
1984-02-26	Jabalpur	6.33	22.39	0
1984-02-27	Jabalpur	7.79	24.84	0
1984-02-28	Jabalpur	8.42	25.72	0
1984-02-29	Jabalpur	10.29	26.75	0
1984-03-01	Jabalpur	10.23	27.44	0
1984-03-02	Jabalpur	11.58	28.25	0
1984-03-03	Jabalpur	11.86	29.64	0
1984-03-04	Jabalpur	11.97	29.38	0
1984-03-05	Jabalpur	13	30.88	0
1984-03-06	Jabalpur	12.07	29.9	0
1984-03-07	Jabalpur	12.58	32.07	0
1984-03-08	Jabalpur	13.23	32.48	0
1984-03-09	Jabalpur	13.9	31.89	0
1984-03-10	Jabalpur	13.28	32.69	0
1984-03-11	Jabalpur	14.89	33.96	0
1984-03-12	Jabalpur	15.49	34.26	0
1984-03-13	Jabalpur	16.07	34.13	0
1984-03-14	Jabalpur	15.73	34.27	0
1984-03-15	Jabalpur	15.93	33.97	0
1984-03-16	Jabalpur	16.22	34.46	0
1984-03-17	Jabalpur	17.49	35.76	0
1984-03-18	Jabalpur	18.65	36.56	0
1984-03-19	Jabalpur	18.59	35.62	0
1984-03-20	Jabalpur	13.66	32.14	0
1984-03-21	Jabalpur	13.98	31.57	0
1984-03-22	Jabalpur	15.27	33.61	0
1984-03-23	Jabalpur	16.66	34.15	0
1984-03-24	Jabalpur	18.25	35.96	0
1984-03-25	Jabalpur	19.46	37.47	0
1984-03-26	Jabalpur	20.43	38.45	0
1984-03-27	Jabalpur	18.87	37.45	0
1984-03-28	Jabalpur	18.67	36	0
1984-03-29	Jabalpur	19.56	37.27	0
1984-03-30	Jabalpur	21.32	38.32	0
1984-03-31	Jabalpur	22.27	39.33	0
1984-04-01	Jabalpur	22.85	39.52	0
1984-04-02	Jabalpur	21.66	40.17	0
1984-04-03	Jabalpur	22.37	39.71	0
1984-04-04	Jabalpur	23.24	38.65	0
1984-04-05	Jabalpur	21.59	38.73	0.3
1984-04-06	Jabalpur	20.53	37.61	0
1984-04-07	Jabalpur	21.93	37.32	0
1984-04-08	Jabalpur	19.44	37.21	0
1984-04-09	Jabalpur	21.21	37.46	1.2
1984-04-10	Jabalpur	18.2	36.47	0.2
1984-04-11	Jabalpur	17.25	33.61	0
1984-04-12	Jabalpur	17.07	34.59	0
1984-04-13	Jabalpur	18.92	35.95	0
1984-04-14	Jabalpur	20.9	37.93	0.5
1984-04-15	Jabalpur	21.88	38.95	0
1984-04-16	Jabalpur	21.54	40.03	0
1984-04-17	Jabalpur	23.6	41.37	0
1984-04-18	Jabalpur	23.45	41.31	0
1984-04-19	Jabalpur	23.41	40.52	0
1984-04-20	Jabalpur	23.92	40	0
1984-04-21	Jabalpur	24.3	39.79	0
1984-04-22	Jabalpur	22.67	38.36	0
1984-04-23	Jabalpur	21.04	36.51	0
1984-04-24	Jabalpur	19.94	35.25	0
1984-04-25	Jabalpur	21.79	34.97	0
1984-04-26	Jabalpur	23.03	37.11	0
1984-04-27	Jabalpur	25	39.17	0
1984-04-28	Jabalpur	24.93	40.07	0
1984-04-29	Jabalpur	24.76	39.96	0
1984-04-30	Jabalpur	24.53	39.75	0
1984-05-01	Jabalpur	20.81	38.95	0
1984-05-02	Jabalpur	21.39	39.9	0
1984-05-03	Jabalpur	21.63	40.26	0
1984-05-04	Jabalpur	22.92	40.78	0
1984-05-05	Jabalpur	24.07	41.38	0
1984-05-06	Jabalpur	24.33	41.09	0
1984-05-07	Jabalpur	24.84	41.66	0
1984-05-08	Jabalpur	24.03	41.8	0
1984-05-09	Jabalpur	25.11	41.97	0
1984-05-10	Jabalpur	28.46	42.18	0
1984-05-11	Jabalpur	27.76	42.38	0
1984-05-12	Jabalpur	27.48	42.16	0
1984-05-13	Jabalpur	26.6	42.08	0
1984-05-14	Jabalpur	27.91	42.65	0
1984-05-15	Jabalpur	28.18	42.83	0
1984-05-16	Jabalpur	26.82	42.19	0
1984-05-17	Jabalpur	26.16	41.99	0
1984-05-18	Jabalpur	26.12	42.89	0
1984-05-19	Jabalpur	24.42	43.18	0
1984-05-20	Jabalpur	27.3	43.08	0
1984-05-21	Jabalpur	26.22	43.16	0
1984-05-22	Jabalpur	27.39	42.65	0
1984-05-23	Jabalpur	26.52	43.67	0
1984-05-24	Jabalpur	28.06	43.81	0
1984-05-25	Jabalpur	28.6	43.93	0
1984-05-26	Jabalpur	29.04	44.02	0
1984-05-27	Jabalpur	29.67	43.88	0
1984-05-28	Jabalpur	29.71	42.72	0
1984-05-29	Jabalpur	28.43	42.03	0.1
1984-05-30	Jabalpur	28.63	42.86	0
1984-05-31	Jabalpur	29.53	42.93	0
1984-06-01	Jabalpur	30.41	42.14	0
1984-06-02	Jabalpur	29.14	41.53	0
1984-06-03	Jabalpur	29.47	41.88	0
1984-06-04	Jabalpur	28.78	42.51	0
1984-06-05	Jabalpur	23.72	40.12	8.3
1984-06-06	Jabalpur	26.83	39.7	0
1984-06-07	Jabalpur	26.63	40.41	0
1984-06-08	Jabalpur	25.04	38.86	0.5
1984-06-09	Jabalpur	25.89	37.12	0
1984-06-10	Jabalpur	23.99	37.57	4.4
1984-06-11	Jabalpur	23.45	35.74	5.1
1984-06-12	Jabalpur	23.13	32.19	1.3
1984-06-13	Jabalpur	23.82	34.54	0
1984-06-14	Jabalpur	25.4	34.86	0
1984-06-15	Jabalpur	24.61	35.37	11.5
1984-06-16	Jabalpur	24.93	34.12	11.7
1984-06-17	Jabalpur	25.95	35.1	0
1984-06-18	Jabalpur	24.99	34.76	0
1984-06-19	Jabalpur	23.95	32.84	0
1984-06-20	Jabalpur	24.74	32.56	0
1984-06-21	Jabalpur	25.69	34.62	0.4
1984-06-22	Jabalpur	25.37	35.09	0
1984-06-23	Jabalpur	25.82	35.89	0
1984-06-24	Jabalpur	26.45	35.74	0
1984-06-25	Jabalpur	26.41	35.46	0
1984-06-26	Jabalpur	26.09	35.81	0
1984-06-27	Jabalpur	25.61	33.72	9.6
1984-06-28	Jabalpur	25.86	34.01	0
1984-06-29	Jabalpur	25.27	34.63	1.3
1984-06-30	Jabalpur	24.31	35.91	3.6
1984-07-01	Jabalpur	23.78	35.45	4.5
1984-07-02	Jabalpur	24.8	32.93	11.2
1984-07-03	Jabalpur	24.17	33.55	12.3
1984-07-04	Jabalpur	24.65	31.14	1.8
1984-07-05	Jabalpur	23.69	31.97	0
1984-07-06	Jabalpur	23.8	30.61	21.3
1984-07-07	Jabalpur	24.53	30.73	0.9
1984-07-08	Jabalpur	24.14	29.83	0
1984-07-09	Jabalpur	22.56	28.58	3.4
1984-07-10	Jabalpur	22.98	28.87	8.1
1984-07-11	Jabalpur	24.16	31.21	1.1
1984-07-12	Jabalpur	23.74	31.66	2.2
1984-07-13	Jabalpur	23.86	32.6	9.6
1984-07-14	Jabalpur	23.19	32.26	26.7
1984-07-15	Jabalpur	23.14	32.93	46.3
1984-07-16	Jabalpur	23.88	33.04	1
1984-07-17	Jabalpur	23.4	32.22	1.1
1984-07-18	Jabalpur	22.96	30.4	16.1
1984-07-19	Jabalpur	22.94	29.21	22
1984-07-20	Jabalpur	22.56	30.11	4.2
1984-07-21	Jabalpur	23.51	29.48	0.3
1984-07-22	Jabalpur	24.15	31.14	0
1984-07-23	Jabalpur	23.54	30.77	0
1984-07-24	Jabalpur	23.92	31.49	0.4
1984-07-25	Jabalpur	24.1	30.58	0
1984-07-26	Jabalpur	24.1	31.41	0
1984-07-27	Jabalpur	24.51	31.64	0
1984-07-28	Jabalpur	24.27	30.63	0.5
1984-07-29	Jabalpur	23.55	29.95	0.8
1984-07-30	Jabalpur	24.17	31.6	0
1984-07-31	Jabalpur	24.56	32.54	0
1984-08-01	Jabalpur	23.52	33	18.7
1984-08-02	Jabalpur	23.57	31.17	8
1984-08-03	Jabalpur	22.1	27.89	18.2
1984-08-04	Jabalpur	21.94	25.94	7
1984-08-05	Jabalpur	22.97	28.93	0
1984-08-06	Jabalpur	23.5	30.66	0
1984-08-07	Jabalpur	23.53	30.16	19.3
1984-08-08	Jabalpur	22.22	27.98	25.5
1984-08-09	Jabalpur	22.15	25.66	59.8
1984-08-10	Jabalpur	22.46	25.4	70.1
1984-08-11	Jabalpur	21.38	27.39	0
1984-08-12	Jabalpur	21.59	26.67	0
1984-08-13	Jabalpur	22.87	28.53	0
1984-08-14	Jabalpur	23.87	30.36	0
1984-08-15	Jabalpur	23.45	30.05	28.3
1984-08-16	Jabalpur	22.51	28.98	17.7
1984-08-17	Jabalpur	23.12	28.9	71.9
1984-08-18	Jabalpur	23.01	27.32	24.7
1984-08-19	Jabalpur	21.58	25.67	148.4
1984-08-20	Jabalpur	21.73	25.97	2.6
1984-08-21	Jabalpur	22.55	27.04	15.4
1984-08-22	Jabalpur	22.68	27.13	2.6
1984-08-23	Jabalpur	22.36	26.8	3.3
1984-08-24	Jabalpur	21.39	26.27	157.2
1984-08-25	Jabalpur	22.42	25.27	0
1984-08-26	Jabalpur	22.52	27.03	0
1984-08-27	Jabalpur	22.52	27.34	0.6
1984-08-28	Jabalpur	22.58	27.07	12.8
1984-08-29	Jabalpur	22.86	27.25	10.7
1984-08-30	Jabalpur	22.22	26.74	35.9
1984-08-31	Jabalpur	22.09	26.11	30.2
1984-09-01	Jabalpur	21.65	25.8	36.4
1984-09-02	Jabalpur	21.63	25.33	13.2
1984-09-03	Jabalpur	22.12	27	0
1984-09-04	Jabalpur	22.01	26.82	53.8
1984-09-05	Jabalpur	21.53	25.91	2.9
1984-09-06	Jabalpur	21.3	25.48	5.8
1984-09-07	Jabalpur	20.86	24.84	21
1984-09-08	Jabalpur	20.85	25.8	0.7
1984-09-09	Jabalpur	21.54	28.05	0.4
1984-09-10	Jabalpur	22.09	29.71	7.7
1984-09-11	Jabalpur	22.12	29.43	0
1984-09-12	Jabalpur	22.5	30.06	0.2
1984-09-13	Jabalpur	22.07	29.48	0
1984-09-14	Jabalpur	22.6	29.04	0
1984-09-15	Jabalpur	22.81	30.43	0.5
1984-09-16	Jabalpur	21.72	30.24	0
1984-09-17	Jabalpur	21.69	29.45	0
1984-09-18	Jabalpur	20.88	28.35	0
1984-09-19	Jabalpur	19.93	29.33	0
1984-09-20	Jabalpur	20.47	30.22	0
1984-09-21	Jabalpur	21.3	31.35	0
1984-09-22	Jabalpur	22.34	32.16	0
1984-09-23	Jabalpur	21.64	32.45	0
1984-09-24	Jabalpur	21.43	32.61	0
1984-09-25	Jabalpur	22.94	32.87	0
1984-09-26	Jabalpur	20.93	31.85	0
1984-09-27	Jabalpur	21.16	32.67	0
1984-09-28	Jabalpur	21.48	33.11	0
1984-09-29	Jabalpur	20.56	33.18	0
1984-09-30	Jabalpur	18.66	33.08	0
1984-10-01	Jabalpur	18.4	33.31	0
1984-10-02	Jabalpur	18.25	32.67	0
1984-10-03	Jabalpur	17.39	32.76	0
1984-10-04	Jabalpur	19.32	32.09	0
1984-10-05	Jabalpur	20.93	32.7	0.4
1984-10-06	Jabalpur	20.99	33.01	0
1984-10-07	Jabalpur	18.92	32.07	0
1984-10-08	Jabalpur	19.46	32.39	0
1984-10-09	Jabalpur	19.44	32.86	0
1984-10-10	Jabalpur	20.87	32.51	0
1984-10-11	Jabalpur	20.84	31.15	0
1984-10-12	Jabalpur	17.22	28.66	0
1984-10-13	Jabalpur	17.17	31.65	0
1984-10-14	Jabalpur	16.28	31.89	0
1984-10-15	Jabalpur	15.38	31.19	0
1984-10-16	Jabalpur	16.99	30.65	0
1984-10-17	Jabalpur	19.33	28.63	0
1984-10-18	Jabalpur	18.3	29.67	0
1984-10-19	Jabalpur	18.48	31.09	0
1984-10-20	Jabalpur	19.05	31.45	0
1984-10-21	Jabalpur	18.4	32.06	0
1984-10-22	Jabalpur	16.51	32.38	0
1984-10-23	Jabalpur	15.66	33.08	0
1984-10-24	Jabalpur	16.23	32.96	0
1984-10-25	Jabalpur	17.86	33.45	0
1984-10-26	Jabalpur	18.43	33.18	0
1984-10-27	Jabalpur	18.04	32.63	0
1984-10-28	Jabalpur	18.66	32.36	0
1984-10-29	Jabalpur	16.31	32.19	0
1984-10-30	Jabalpur	14.72	31.39	0
1984-10-31	Jabalpur	13.6	30.2	0
1984-11-01	Jabalpur	12.21	29.45	0
1984-11-02	Jabalpur	11.06	28.78	0
1984-11-03	Jabalpur	11.6	29.21	0
1984-11-04	Jabalpur	13.52	28.84	0
1984-11-05	Jabalpur	12.66	29.02	0
1984-11-06	Jabalpur	11.97	29.1	0
1984-11-07	Jabalpur	11.16	28.57	0
1984-11-08	Jabalpur	11.87	29.3	0
1984-11-09	Jabalpur	12.27	29.37	0
1984-11-10	Jabalpur	13.81	30.48	0
1984-11-11	Jabalpur	14.55	31.77	0
1984-11-12	Jabalpur	11.57	29.49	0
1984-11-13	Jabalpur	10.79	28.7	0
1984-11-14	Jabalpur	11.47	29.4	0
1984-11-15	Jabalpur	11.55	29.75	0
1984-11-16	Jabalpur	11.62	30.16	0
1984-11-17	Jabalpur	11.77	30.45	0
1984-11-18	Jabalpur	11.09	29.78	0
1984-11-19	Jabalpur	11.07	28.91	0
1984-11-20	Jabalpur	10.67	28.94	0
1984-11-21	Jabalpur	10.63	28.4	0
1984-11-22	Jabalpur	11.4	28.75	0
1984-11-23	Jabalpur	10.96	28.76	0
1984-11-24	Jabalpur	10.76	28.29	0
1984-11-25	Jabalpur	10.29	26.85	0
1984-11-26	Jabalpur	9.09	25.91	0
1984-11-27	Jabalpur	8.42	26.05	0
1984-11-28	Jabalpur	8.09	25.6	0
1984-11-29	Jabalpur	7.7	25.27	0
1984-11-30	Jabalpur	8.32	25.32	0
1984-12-01	Jabalpur	10.03	24.8	0
1984-12-02	Jabalpur	10.83	25.68	0
1984-12-03	Jabalpur	11.21	26.31	0
1984-12-04	Jabalpur	10.29	26.73	0
1984-12-05	Jabalpur	8.73	26.92	0
1984-12-06	Jabalpur	9.14	27.52	0
1984-12-07	Jabalpur	9.53	27.24	0
1984-12-08	Jabalpur	9.97	27.29	0
1984-12-09	Jabalpur	8.62	26.26	0
1984-12-10	Jabalpur	9.44	27.78	0
1984-12-11	Jabalpur	11.35	28.73	0
1984-12-12	Jabalpur	12.41	27.83	0
1984-12-13	Jabalpur	13.65	28.74	0
1984-12-14	Jabalpur	10.63	29.4	0
1984-12-15	Jabalpur	7	25.22	0
1984-12-16	Jabalpur	7.82	26.41	0
1984-12-17	Jabalpur	8.1	27.25	0
1984-12-18	Jabalpur	7.78	27.24	0
1984-12-19	Jabalpur	6.32	27.06	0
1984-12-20	Jabalpur	5.84	25.74	0
1984-12-21	Jabalpur	5.38	25.09	0
1984-12-22	Jabalpur	5.47	25.01	0
1984-12-23	Jabalpur	5.79	25.86	0
1984-12-24	Jabalpur	6.57	26.69	0
1984-12-25	Jabalpur	8.04	27.22	0
1984-12-26	Jabalpur	7.76	27.52	0
1984-12-27	Jabalpur	8.39	27.7	0
1984-12-28	Jabalpur	8.6	26.85	0
1984-12-29	Jabalpur	8.51	26.25	0
1984-12-30	Jabalpur	9.62	25.81	0
1984-12-31	Jabalpur	11.05	28.28	0
1985-01-01	Jabalpur	13.02	24.76	28.5
1985-01-02	Jabalpur	12.44	23.28	0.1
1985-01-03	Jabalpur	12.21	21.18	0
1985-01-04	Jabalpur	8.62	20.3	0
1985-01-05	Jabalpur	10.13	24.4	0
1985-01-06	Jabalpur	12.66	24.27	0
1985-01-07	Jabalpur	9.17	21.73	0
1985-01-08	Jabalpur	10.04	22.35	0
1985-01-09	Jabalpur	9.77	23.4	0
1985-01-10	Jabalpur	9.92	24.19	0
1985-01-11	Jabalpur	11.85	23.25	25.1
1985-01-12	Jabalpur	11.11	24.15	0
1985-01-13	Jabalpur	11.06	25.41	21.9
1985-01-14	Jabalpur	10.73	25.15	0
1985-01-15	Jabalpur	10.06	24.49	0
1985-01-16	Jabalpur	8.64	22.86	3.8
1985-01-17	Jabalpur	7.54	23.31	0
1985-01-18	Jabalpur	8.86	23.56	0
1985-01-19	Jabalpur	11.69	27.44	0
1985-01-20	Jabalpur	10.42	23.67	2.8
1985-01-21	Jabalpur	11.55	23.56	0.1
1985-01-22	Jabalpur	13.71	24	2.5
1985-01-23	Jabalpur	9.01	22.12	0
1985-01-24	Jabalpur	8.08	23.21	0
1985-01-25	Jabalpur	8.34	24.3	0
1985-01-26	Jabalpur	9.65	25.28	0
1985-01-27	Jabalpur	10.62	28.11	0
1985-01-28	Jabalpur	10.21	27.75	0
1985-01-29	Jabalpur	10.44	25.48	0
1985-01-30	Jabalpur	10.51	26.06	0
1985-01-31	Jabalpur	11.9	26.13	0.5
1985-02-01	Jabalpur	11.78	24.87	1.5
1985-02-02	Jabalpur	10.62	25.5	0
1985-02-03	Jabalpur	10.05	26.31	0
1985-02-04	Jabalpur	11.66	26.68	0
1985-02-05	Jabalpur	12.83	29.85	0
1985-02-06	Jabalpur	10.32	28.44	0
1985-02-07	Jabalpur	7.14	26.32	0
1985-02-08	Jabalpur	8.2	25.97	0
1985-02-09	Jabalpur	9.52	28.65	0
1985-02-10	Jabalpur	9.54	28.66	0
1985-02-11	Jabalpur	9.17	28.51	0
1985-02-12	Jabalpur	7.04	26.65	0
1985-02-13	Jabalpur	7.61	25.09	0
1985-02-14	Jabalpur	9.16	26.6	0
1985-02-15	Jabalpur	7.68	26.33	0
1985-02-16	Jabalpur	7.53	26.23	0
1985-02-17	Jabalpur	8.18	27.02	0
1985-02-18	Jabalpur	8.24	28.85	0
1985-02-19	Jabalpur	11.28	30.33	0
1985-02-20	Jabalpur	13.26	31.95	0
1985-02-21	Jabalpur	11.56	30.46	0
1985-02-22	Jabalpur	8.96	27.46	0
1985-02-23	Jabalpur	9.08	28.96	0
1985-02-24	Jabalpur	8.99	30.32	0
1985-02-25	Jabalpur	11.29	31.64	0
1985-02-26	Jabalpur	11.21	32.01	0
1985-02-27	Jabalpur	11.09	32.2	0
1985-02-28	Jabalpur	12.49	33.82	0
1985-03-01	Jabalpur	14.16	35.39	0
1985-03-02	Jabalpur	14.42	34.06	0
1985-03-03	Jabalpur	14.45	33.43	0
1985-03-04	Jabalpur	14.17	34.3	0
1985-03-05	Jabalpur	14.47	34.87	0
1985-03-06	Jabalpur	15.26	35.69	0
1985-03-07	Jabalpur	17.26	36.72	0
1985-03-08	Jabalpur	16.91	36.77	0
1985-03-09	Jabalpur	15.83	36.18	0
1985-03-10	Jabalpur	15.27	36.27	0
1985-03-11	Jabalpur	15.36	35.74	0
1985-03-12	Jabalpur	16.18	35.19	0
1985-03-13	Jabalpur	17.14	37.17	0
1985-03-14	Jabalpur	15.8	35.91	0
1985-03-15	Jabalpur	15.1	34.82	0
1985-03-16	Jabalpur	15.81	35.01	0
1985-03-17	Jabalpur	16.54	36.56	0
1985-03-18	Jabalpur	16.2	37.1	0
1985-03-19	Jabalpur	15.73	35.82	0
1985-03-20	Jabalpur	14.63	33.86	0
1985-03-21	Jabalpur	15.52	33.2	0
1985-03-22	Jabalpur	16.18	34.03	0
1985-03-23	Jabalpur	17.83	36.35	0
1985-03-24	Jabalpur	19.67	38.36	0
1985-03-25	Jabalpur	19.61	36.99	0
1985-03-26	Jabalpur	19.19	36.57	0
1985-03-27	Jabalpur	20.73	37.79	0
1985-03-28	Jabalpur	22.13	39.09	0
1985-03-29	Jabalpur	21.74	38.5	0
1985-03-30	Jabalpur	22.33	37.96	0
1985-03-31	Jabalpur	21.2	35.87	0
1985-04-01	Jabalpur	20.29	35.67	0
1985-04-02	Jabalpur	18.24	31.51	0
1985-04-03	Jabalpur	19.17	34.55	0
1985-04-04	Jabalpur	20.52	34.63	0
1985-04-05	Jabalpur	20.37	35.16	0
1985-04-06	Jabalpur	20.05	35.52	0
1985-04-07	Jabalpur	20.86	35.71	0
1985-04-08	Jabalpur	20.92	36.9	0
1985-04-09	Jabalpur	23	38.06	0
1985-04-10	Jabalpur	24.99	39.12	0
1985-04-11	Jabalpur	20.63	37.6	0
1985-04-12	Jabalpur	20.4	36.16	0
1985-04-13	Jabalpur	21.02	38.59	0
1985-04-14	Jabalpur	23	40.45	0
1985-04-15	Jabalpur	20.19	37.18	0
1985-04-16	Jabalpur	18.91	36.76	0
1985-04-17	Jabalpur	19.37	37.82	0
1985-04-18	Jabalpur	19.87	39.08	0
1985-04-19	Jabalpur	21.02	39.88	0
1985-04-20	Jabalpur	22.64	40.82	0
1985-04-21	Jabalpur	23.24	40.93	0
1985-04-22	Jabalpur	24.25	40.86	0
1985-04-23	Jabalpur	24.23	41.31	0
1985-04-24	Jabalpur	24.78	40.57	0
1985-04-25	Jabalpur	23.15	39.93	0
1985-04-26	Jabalpur	23.63	40.35	0
1985-04-27	Jabalpur	23.2	40.74	0
1985-04-28	Jabalpur	24.27	41.23	0
1985-04-29	Jabalpur	25.15	41.38	0
1985-04-30	Jabalpur	25.07	41.92	0
1985-05-01	Jabalpur	24.35	41.36	0
1985-05-02	Jabalpur	24.75	40.89	0
1985-05-03	Jabalpur	24.58	39.18	0
1985-05-04	Jabalpur	25.52	39.12	0
1985-05-05	Jabalpur	24.14	39.3	0
1985-05-06	Jabalpur	24.89	40.17	0
1985-05-07	Jabalpur	25.66	41.31	0
1985-05-08	Jabalpur	25.22	41.92	0
1985-05-09	Jabalpur	26.81	42.72	0
1985-05-10	Jabalpur	26.87	42.3	0
1985-05-11	Jabalpur	26.33	42.22	0
1985-05-12	Jabalpur	26.21	40.93	0
1985-05-13	Jabalpur	26.18	40.82	0
1985-05-14	Jabalpur	26.09	42.52	0
1985-05-15	Jabalpur	26.19	43.2	0
1985-05-16	Jabalpur	25.9	41.97	0
1985-05-17	Jabalpur	26.24	42.58	0
1985-05-18	Jabalpur	27.26	43.45	0
1985-05-19	Jabalpur	26.61	43	0
1985-05-20	Jabalpur	25.9	43.6	0
1985-05-21	Jabalpur	27.99	43.94	0
1985-05-22	Jabalpur	28.01	44	0
1985-05-23	Jabalpur	26.74	42.17	0
1985-05-24	Jabalpur	27.98	42.09	0
1985-05-25	Jabalpur	27.25	41.2	0
1985-05-26	Jabalpur	27.98	40.93	0
1985-05-27	Jabalpur	28.24	41.28	0.5
1985-05-28	Jabalpur	26.81	41.78	0
1985-05-29	Jabalpur	26.58	42.33	0
1985-05-30	Jabalpur	28	41.99	0
1985-05-31	Jabalpur	26.34	41.53	0
1985-06-01	Jabalpur	24.96	37.57	0
1985-06-02	Jabalpur	27.27	38.74	0
1985-06-03	Jabalpur	25.89	37.72	0
1985-06-04	Jabalpur	25.26	36.65	5.5
1985-06-05	Jabalpur	26.09	38.12	0
1985-06-06	Jabalpur	26.42	37.87	0.1
1985-06-07	Jabalpur	25.3	37.52	1.1
1985-06-08	Jabalpur	23	36.37	6.3
1985-06-09	Jabalpur	22.21	35.7	15.5
1985-06-10	Jabalpur	22.77	35.05	4.7
1985-06-11	Jabalpur	25.26	35.56	2.7
1985-06-12	Jabalpur	25.91	37.61	0
1985-06-13	Jabalpur	27.4	38.21	0
1985-06-14	Jabalpur	26.75	38.87	0
1985-06-15	Jabalpur	27.04	39.87	0
1985-06-16	Jabalpur	27.05	39.2	0
1985-06-17	Jabalpur	27.01	40.11	0
1985-06-18	Jabalpur	27.9	40.23	0
1985-06-19	Jabalpur	27.55	39.11	0
1985-06-20	Jabalpur	28.09	38.61	0
1985-06-21	Jabalpur	26.07	38.02	0
1985-06-22	Jabalpur	25.95	38.32	0
1985-06-23	Jabalpur	26.97	39.03	0
1985-06-24	Jabalpur	27.64	40.46	0
1985-06-25	Jabalpur	25.12	39.64	0
1985-06-26	Jabalpur	25.3	36.82	0
1985-06-27	Jabalpur	23.49	34.22	0
1985-06-28	Jabalpur	21.62	30.85	6
1985-06-29	Jabalpur	23.73	31.87	6.5
1985-06-30	Jabalpur	24.85	34.59	0
1985-07-01	Jabalpur	25.02	35.57	0.5
1985-07-02	Jabalpur	23.69	35.49	6.1
1985-07-03	Jabalpur	24.89	35.03	3.3
1985-07-04	Jabalpur	26.16	34.48	0
1985-07-05	Jabalpur	25.12	34.88	2.1
1985-07-06	Jabalpur	22.98	34.82	47.9
1985-07-07	Jabalpur	23.62	29.27	0.5
1985-07-08	Jabalpur	23.92	30.77	1.3
1985-07-09	Jabalpur	23.55	31.67	18.5
1985-07-10	Jabalpur	24.76	32.27	0.2
1985-07-11	Jabalpur	24.08	32.66	5
1985-07-12	Jabalpur	22.1	31.02	21.3
1985-07-13	Jabalpur	22.94	29.59	29
1985-07-14	Jabalpur	23.16	28.96	4.9
1985-07-15	Jabalpur	23.14	29.67	54.3
1985-07-16	Jabalpur	22.61	27.4	25.4
1985-07-17	Jabalpur	23.05	27.79	30.3
1985-07-18	Jabalpur	22.55	27.73	10.7
1985-07-19	Jabalpur	23.09	29.44	11.4
1985-07-20	Jabalpur	23.14	29.72	0.3
1985-07-21	Jabalpur	23.17	30.3	51
1985-07-22	Jabalpur	22.71	28.4	11.1
1985-07-23	Jabalpur	23.41	30.05	12
1985-07-24	Jabalpur	23.62	29.9	1.6
1985-07-25	Jabalpur	22.28	28.92	53.5
1985-07-26	Jabalpur	22.09	27.43	10.1
1985-07-27	Jabalpur	22.72	27.96	2.5
1985-07-28	Jabalpur	23.67	28.84	1
1985-07-29	Jabalpur	23.05	29.27	6.6
1985-07-30	Jabalpur	22.39	26.09	63.1
1985-07-31	Jabalpur	22.38	25.63	30.1
1985-08-01	Jabalpur	23.58	29.47	5.6
1985-08-02	Jabalpur	23.26	31.12	10.6
1985-08-03	Jabalpur	22.64	28.87	24.5
1985-08-04	Jabalpur	22.64	27.92	21.1
1985-08-05	Jabalpur	22.92	29.07	0
1985-08-06	Jabalpur	22.79	27.42	12.5
1985-08-07	Jabalpur	22.29	26.41	9.5
1985-08-08	Jabalpur	22.15	27.1	72.4
1985-08-09	Jabalpur	21.19	25.68	17.8
1985-08-10	Jabalpur	21.36	25.35	0.6
1985-08-11	Jabalpur	22.7	25.73	7
1985-08-12	Jabalpur	23.51	28.52	23.5
1985-08-13	Jabalpur	24.01	29.82	17.5
1985-08-14	Jabalpur	23.54	31.35	8.9
1985-08-15	Jabalpur	23.56	29.87	4.4
1985-08-16	Jabalpur	23.96	29.7	12.5
1985-08-17	Jabalpur	23.4	29.72	25.7
1985-08-18	Jabalpur	22.91	28.32	8.4
1985-08-19	Jabalpur	23.35	27.84	1.5
1985-08-20	Jabalpur	22.68	26.21	4.2
1985-08-21	Jabalpur	22.54	25.21	2.8
1985-08-22	Jabalpur	22.99	26.29	1.2
1985-08-23	Jabalpur	22.94	27.11	0.4
1985-08-24	Jabalpur	22.34	28.8	0.4
1985-08-25	Jabalpur	22.7	29.88	0
1985-08-26	Jabalpur	22.22	29.81	0
1985-08-27	Jabalpur	21.83	30.17	0
1985-08-28	Jabalpur	22.53	30.37	0
1985-08-29	Jabalpur	22.89	29.61	6.6
1985-08-30	Jabalpur	21.96	27.26	1.9
1985-08-31	Jabalpur	21.94	26.28	0
1985-09-01	Jabalpur	22.57	26.9	0
1985-09-02	Jabalpur	22.67	27.7	0.8
1985-09-03	Jabalpur	22.28	27.58	1.4
1985-09-04	Jabalpur	22.99	29.25	0.8
1985-09-05	Jabalpur	22.09	29.71	0
1985-09-06	Jabalpur	21.71	29.57	0
1985-09-07	Jabalpur	21.51	30.32	0
1985-09-08	Jabalpur	22.01	31.73	0
1985-09-09	Jabalpur	22.3	32.49	0
1985-09-10	Jabalpur	23.27	32.73	0
1985-09-11	Jabalpur	23.82	32.94	0
1985-09-12	Jabalpur	21.7	29.77	3.9
1985-09-13	Jabalpur	22.23	27.9	0
1985-09-14	Jabalpur	22.25	27.33	0.6
1985-09-15	Jabalpur	22.68	28.44	0.3
1985-09-16	Jabalpur	21.85	29.57	0
1985-09-17	Jabalpur	22.21	30.38	0
1985-09-18	Jabalpur	21.97	30.36	0.3
1985-09-19	Jabalpur	22.04	30.46	0.5
1985-09-20	Jabalpur	21.96	31.61	0
1985-09-21	Jabalpur	22.5	31.39	0.2
1985-09-22	Jabalpur	22.76	29.18	2
1985-09-23	Jabalpur	22.38	27.74	0.1
1985-09-24	Jabalpur	22.26	27.87	1
1985-09-25	Jabalpur	22.29	26.56	0.3
1985-09-26	Jabalpur	22.07	30.2	0
1985-09-27	Jabalpur	22.06	30.49	0
1985-09-28	Jabalpur	21.99	31.97	0.1
1985-09-29	Jabalpur	21.98	32.55	0
1985-09-30	Jabalpur	21.17	32.51	0
1985-10-01	Jabalpur	21.03	33.05	0
1985-10-02	Jabalpur	22.06	33.28	0
1985-10-03	Jabalpur	22.35	32.34	0
1985-10-04	Jabalpur	22.49	31.07	1.1
1985-10-05	Jabalpur	21.69	28.87	0.5
1985-10-06	Jabalpur	21.79	28.21	0.4
1985-10-07	Jabalpur	20.64	28.34	0
1985-10-08	Jabalpur	21.48	28.9	0
1985-10-09	Jabalpur	21.72	28.76	2.1
1985-10-10	Jabalpur	21.44	27.5	1.5
1985-10-11	Jabalpur	21.45	26.68	0.3
1985-10-12	Jabalpur	21.76	26.77	1.4
1985-10-13	Jabalpur	21.34	25.36	20
1985-10-14	Jabalpur	21.08	26.64	0
1985-10-15	Jabalpur	20.45	27.76	0
1985-10-16	Jabalpur	18.96	28.28	0
1985-10-17	Jabalpur	18.64	29.29	0
1985-10-18	Jabalpur	16.12	29.41	0
1985-10-19	Jabalpur	15.34	29.37	0
1985-10-20	Jabalpur	14.54	29.75	0
1985-10-21	Jabalpur	14.27	29.65	0
1985-10-22	Jabalpur	14.97	28.86	0
1985-10-23	Jabalpur	14.99	28.77	0
1985-10-24	Jabalpur	14.21	28.96	0
1985-10-25	Jabalpur	14.58	29.58	0
1985-10-26	Jabalpur	14.07	29.51	0
1985-10-27	Jabalpur	14.77	30	0
1985-10-28	Jabalpur	13.91	30.35	0
1985-10-29	Jabalpur	14.38	30.15	0
1985-10-30	Jabalpur	14.09	30.72	0
1985-10-31	Jabalpur	14.01	30.89	0
1985-11-01	Jabalpur	14.25	30.71	0
1985-11-02	Jabalpur	14.04	29.77	0
1985-11-03	Jabalpur	14.18	29.08	0
1985-11-04	Jabalpur	13.68	28.73	0
1985-11-05	Jabalpur	13.18	28.71	0
1985-11-06	Jabalpur	12.96	28.77	0
1985-11-07	Jabalpur	12.05	29.36	0
1985-11-08	Jabalpur	12.58	29.69	0
1985-11-09	Jabalpur	13.41	30.84	0
1985-11-10	Jabalpur	13.68	31.03	0
1985-11-11	Jabalpur	13.61	30.68	0
1985-11-12	Jabalpur	13.12	30.66	0
1985-11-13	Jabalpur	13.01	29.5	0
1985-11-14	Jabalpur	11.32	28.52	0
1985-11-15	Jabalpur	10.74	26.45	0
1985-11-16	Jabalpur	11.21	27.05	0
1985-11-17	Jabalpur	11.37	26.82	0
1985-11-18	Jabalpur	11.03	26.68	0
1985-11-19	Jabalpur	10.76	26.81	0
1985-11-20	Jabalpur	11.21	26.69	0
1985-11-21	Jabalpur	11.76	28.19	0
1985-11-22	Jabalpur	11.92	29.25	0
1985-11-23	Jabalpur	12.19	29.12	0
1985-11-24	Jabalpur	12.36	28.56	0
1985-11-25	Jabalpur	12.88	28.59	0
1985-11-26	Jabalpur	12.26	28.62	0
1985-11-27	Jabalpur	12.21	28.2	0
1985-11-28	Jabalpur	11.45	27.55	0
1985-11-29	Jabalpur	9.93	26.85	0
1985-11-30	Jabalpur	9.35	26.45	0
1985-12-01	Jabalpur	9.45	26.34	0
1985-12-02	Jabalpur	9.63	27.03	0
1985-12-03	Jabalpur	9.08	26.91	0
1985-12-04	Jabalpur	8.24	26.57	0
1985-12-05	Jabalpur	8.16	26.29	0
1985-12-06	Jabalpur	8.64	26.95	0
1985-12-07	Jabalpur	8.66	26.65	0
1985-12-08	Jabalpur	9.86	26.31	0
1985-12-09	Jabalpur	10.13	27.46	0
1985-12-10	Jabalpur	9.94	26.49	0
1985-12-11	Jabalpur	10.96	26.19	0
1985-12-12	Jabalpur	13.04	27.6	0
1985-12-13	Jabalpur	13.06	26.77	0
1985-12-14	Jabalpur	13.17	27.42	0
1985-12-15	Jabalpur	12.14	27.81	0
1985-12-16	Jabalpur	13.02	30.06	0
1985-12-17	Jabalpur	13.47	28.3	0
1985-12-18	Jabalpur	13.45	27.85	0
1985-12-19	Jabalpur	12.06	27.01	0
1985-12-20	Jabalpur	8.76	25.27	0
1985-12-21	Jabalpur	8.04	25.81	0
1985-12-22	Jabalpur	9.14	25.7	0
1985-12-23	Jabalpur	8.25	25.27	0
1985-12-24	Jabalpur	8.73	25.42	0
1985-12-25	Jabalpur	10.12	25.82	0
1985-12-26	Jabalpur	12.57	27.72	0
1985-12-27	Jabalpur	15.02	27.75	0
1985-12-28	Jabalpur	11.59	27.81	0
1985-12-29	Jabalpur	7.75	24.02	0
1985-12-30	Jabalpur	8.04	23.9	0
1985-12-31	Jabalpur	7.13	24.1	0
1986-01-01	Jabalpur	6	23.23	0
1986-01-02	Jabalpur	5.44	22.07	0
1986-01-03	Jabalpur	4.95	20.91	0
1986-01-04	Jabalpur	5.03	21.31	0
1986-01-05	Jabalpur	2.9	21.31	0
1986-01-06	Jabalpur	3.53	22.5	0
1986-01-07	Jabalpur	4.11	23.81	0
1986-01-08	Jabalpur	4.6	24.02	0
1986-01-09	Jabalpur	6.19	25.22	0
1986-01-10	Jabalpur	6.8	25.67	0
1986-01-11	Jabalpur	7.62	24.84	0
1986-01-12	Jabalpur	9.4	25.65	0
1986-01-13	Jabalpur	8.71	27.51	0
1986-01-14	Jabalpur	8.87	27.15	0
1986-01-15	Jabalpur	10.07	26.5	0
1986-01-16	Jabalpur	9.93	24.89	0
1986-01-17	Jabalpur	9.83	24.44	0
1986-01-18	Jabalpur	10.84	26.58	0
1986-01-19	Jabalpur	10.87	25.84	0
1986-01-20	Jabalpur	12.88	25.42	0.3
1986-01-21	Jabalpur	12.77	24.13	0
1986-01-22	Jabalpur	12.4	26.07	0
1986-01-23	Jabalpur	13.73	28.23	0
1986-01-24	Jabalpur	11.39	28.46	0
1986-01-25	Jabalpur	11.15	26.83	0
1986-01-26	Jabalpur	13.19	28.08	1.9
1986-01-27	Jabalpur	11.59	24.84	0
1986-01-28	Jabalpur	14.66	27.43	0
1986-01-29	Jabalpur	13.21	25.93	2.3
1986-01-30	Jabalpur	13.84	27.23	0
1986-01-31	Jabalpur	14.04	27.48	0
1986-02-01	Jabalpur	11.25	23.75	0
1986-02-02	Jabalpur	11.23	24.29	0
1986-02-03	Jabalpur	10.39	25.5	0
1986-02-04	Jabalpur	12.82	27.21	0
1986-02-05	Jabalpur	14.77	27.41	5
1986-02-06	Jabalpur	12.93	25.61	0
1986-02-07	Jabalpur	12.75	26.48	0.2
1986-02-08	Jabalpur	12.71	22.53	9.4
1986-02-09	Jabalpur	14.7	26.57	0
1986-02-10	Jabalpur	14.11	25.97	18
1986-02-11	Jabalpur	13.35	23.85	0
1986-02-12	Jabalpur	13.5	22.6	1
1986-02-13	Jabalpur	13.6	24.18	4.4
1986-02-14	Jabalpur	12.56	25.55	9.7
1986-02-15	Jabalpur	12.01	25.37	1.1
1986-02-16	Jabalpur	11.64	24.91	0
1986-02-17	Jabalpur	10.85	24.82	0
1986-02-18	Jabalpur	10.81	24.76	0
1986-02-19	Jabalpur	11.43	26.56	0
1986-02-20	Jabalpur	12.6	27.66	0
1986-02-21	Jabalpur	15.5	28.9	0
1986-02-22	Jabalpur	16.82	31.39	0.9
1986-02-23	Jabalpur	13.34	28.06	0.4
1986-02-24	Jabalpur	10.74	25.32	0
1986-02-25	Jabalpur	11.76	25.26	0
1986-02-26	Jabalpur	11.69	25.89	0
1986-02-27	Jabalpur	13.78	27.59	1.9
1986-02-28	Jabalpur	14.15	26.53	5.9
1986-03-01	Jabalpur	13.44	23.94	1.7
1986-03-02	Jabalpur	12.95	26.52	12.4
1986-03-03	Jabalpur	12.39	27.71	4.4
1986-03-04	Jabalpur	12.07	28.43	0
1986-03-05	Jabalpur	13.51	29.21	0
1986-03-06	Jabalpur	15.2	30.28	0
1986-03-07	Jabalpur	16.36	31.46	0
1986-03-08	Jabalpur	17.69	32.42	2.2
1986-03-09	Jabalpur	17.3	31.96	0
1986-03-10	Jabalpur	17.97	33.26	0.6
1986-03-11	Jabalpur	19.45	35.09	0.6
1986-03-12	Jabalpur	19.23	34.38	0.7
1986-03-13	Jabalpur	16.79	33.04	0
1986-03-14	Jabalpur	17.19	33.31	0
1986-03-15	Jabalpur	20	33.85	0
1986-03-16	Jabalpur	14.72	32.28	0
1986-03-17	Jabalpur	13.59	30.16	0
1986-03-18	Jabalpur	16.74	31.89	0
1986-03-19	Jabalpur	17.64	33.9	0
1986-03-20	Jabalpur	15.23	33.24	0
1986-03-21	Jabalpur	13.11	30.74	0
1986-03-22	Jabalpur	16.05	31.27	0
1986-03-23	Jabalpur	17.42	34.3	0
1986-03-24	Jabalpur	16.61	33.43	0
1986-03-25	Jabalpur	16.6	33.04	0
1986-03-26	Jabalpur	15.11	31.35	0
1986-03-27	Jabalpur	14.88	31.9	0
1986-03-28	Jabalpur	17.75	33.47	0
1986-03-29	Jabalpur	20.14	36.68	0
1986-03-30	Jabalpur	20.75	38.52	0
1986-03-31	Jabalpur	19.05	37.18	0
1986-04-01	Jabalpur	16.93	34.8	0
1986-04-02	Jabalpur	17.8	34.96	0
1986-04-03	Jabalpur	18.41	35.95	0
1986-04-04	Jabalpur	19.58	34.75	0
1986-04-05	Jabalpur	16.37	34.64	0
1986-04-06	Jabalpur	16.47	32.54	0
1986-04-07	Jabalpur	18.57	34.08	0
1986-04-08	Jabalpur	20.97	38.17	0
1986-04-09	Jabalpur	21.56	38.81	0
1986-04-10	Jabalpur	21.9	39.49	0
1986-04-11	Jabalpur	23.41	39.86	0
1986-04-12	Jabalpur	22.34	39.34	0
1986-04-13	Jabalpur	22.87	40.29	0
1986-04-14	Jabalpur	23.42	40.19	0
1986-04-15	Jabalpur	23.19	40.46	0
1986-04-16	Jabalpur	22.94	39.68	0
1986-04-17	Jabalpur	22.77	39.81	0
1986-04-18	Jabalpur	21.83	39.47	0
1986-04-19	Jabalpur	22.45	39.73	0
1986-04-20	Jabalpur	22.85	40.14	0
1986-04-21	Jabalpur	23.19	40.7	0
1986-04-22	Jabalpur	24.05	40.6	0
1986-04-23	Jabalpur	24.58	41.06	0
1986-04-24	Jabalpur	24.54	40.85	0
1986-04-25	Jabalpur	24.09	40.88	0
1986-04-26	Jabalpur	24.64	39.96	0
1986-04-27	Jabalpur	24.17	38.92	0
1986-04-28	Jabalpur	23.24	38.74	0
1986-04-29	Jabalpur	22.26	38.15	0
1986-04-30	Jabalpur	23.66	38.03	0
1986-05-01	Jabalpur	21.86	38.57	0
1986-05-02	Jabalpur	23.79	39.92	0
1986-05-03	Jabalpur	25.49	41.19	0
1986-05-04	Jabalpur	23.11	41.33	0
1986-05-05	Jabalpur	21.92	39.67	0
1986-05-06	Jabalpur	23.12	39.67	0
1986-05-07	Jabalpur	24.19	41.3	0
1986-05-08	Jabalpur	24.99	41.11	0
1986-05-09	Jabalpur	25.16	40.03	0
1986-05-10	Jabalpur	24.7	40.36	0.6
1986-05-11	Jabalpur	24.53	38.92	0
1986-05-12	Jabalpur	23.99	39.57	0
1986-05-13	Jabalpur	25.78	40.84	0.4
1986-05-14	Jabalpur	25.63	41.54	2.9
1986-05-15	Jabalpur	25.02	41.62	0.5
1986-05-16	Jabalpur	25.4	41.27	2.8
1986-05-17	Jabalpur	23.7	40.73	1.2
1986-05-18	Jabalpur	25.62	39.6	6.6
1986-05-19	Jabalpur	25.73	40.62	0
1986-05-20	Jabalpur	27.07	40.55	0
1986-05-21	Jabalpur	25.51	38.9	0
1986-05-22	Jabalpur	22.53	38.78	0
1986-05-23	Jabalpur	21.68	39.25	0
1986-05-24	Jabalpur	21.92	40.06	0
1986-05-25	Jabalpur	23.85	40.64	0
1986-05-26	Jabalpur	25.78	41.1	0
1986-05-27	Jabalpur	24.61	40.65	0
1986-05-28	Jabalpur	24.99	38.53	0
1986-05-29	Jabalpur	22.92	38.65	0
1986-05-30	Jabalpur	24.19	36.21	2.3
1986-05-31	Jabalpur	24.71	38.33	7.1
1986-06-01	Jabalpur	23.71	37.37	0
1986-06-02	Jabalpur	24.49	36.65	0
1986-06-03	Jabalpur	24.14	38.3	0
1986-06-04	Jabalpur	25.91	38.88	0
1986-06-05	Jabalpur	25.5	40.43	0
1986-06-06	Jabalpur	27.14	40.56	0
1986-06-07	Jabalpur	25.29	40.57	0
1986-06-08	Jabalpur	25.76	41.01	0
1986-06-09	Jabalpur	26.45	41.92	0
1986-06-10	Jabalpur	24.77	42.28	0
1986-06-11	Jabalpur	27.89	43.01	0
1986-06-12	Jabalpur	29.73	42.88	0
1986-06-13	Jabalpur	28.82	42.16	0
1986-06-14	Jabalpur	28.03	41.92	0
1986-06-15	Jabalpur	25.99	40.1	3.4
1986-06-16	Jabalpur	26.73	39.41	0.4
1986-06-17	Jabalpur	27.42	39.65	0
1986-06-18	Jabalpur	26.85	38.91	0.9
1986-06-19	Jabalpur	26.5	36.92	7.8
1986-06-20	Jabalpur	22.36	37.26	18.4
1986-06-21	Jabalpur	23.16	33.19	56.8
1986-06-22	Jabalpur	23.81	30.16	16.2
1986-06-23	Jabalpur	24.03	30.9	18
1986-06-24	Jabalpur	23.5	30.37	4.3
1986-06-25	Jabalpur	22.21	29.26	7
1986-06-26	Jabalpur	21.99	27.32	6
1986-06-27	Jabalpur	22.53	26.26	24.1
1986-06-28	Jabalpur	22.04	26.92	11.2
1986-06-29	Jabalpur	23.18	29.92	0
1986-06-30	Jabalpur	23.27	31.44	21.3
1986-07-01	Jabalpur	23.88	31.92	0
1986-07-02	Jabalpur	23.95	33.11	21.3
1986-07-03	Jabalpur	25.19	33.5	0
1986-07-04	Jabalpur	25.25	33.78	5
1986-07-05	Jabalpur	25.6	33.87	0
1986-07-06	Jabalpur	25.6	33.83	20.9
1986-07-07	Jabalpur	23.91	32.96	20
1986-07-08	Jabalpur	22.44	28.83	15.4
1986-07-09	Jabalpur	21.72	26.58	15.4
1986-07-10	Jabalpur	22.52	26.79	2.1
1986-07-11	Jabalpur	23.44	28.61	28.9
1986-07-12	Jabalpur	23.64	30.5	31.8
1986-07-13	Jabalpur	23.47	33.08	0
1986-07-14	Jabalpur	23.23	31.57	21.4
1986-07-15	Jabalpur	23.78	30.15	2.3
1986-07-16	Jabalpur	24.26	30.16	6.2
1986-07-17	Jabalpur	24.25	31.26	1.4
1986-07-18	Jabalpur	23.29	30.21	37.4
1986-07-19	Jabalpur	22.74	29.85	15.8
1986-07-20	Jabalpur	22.94	28.59	7.6
1986-07-21	Jabalpur	23.04	27.75	3.4
1986-07-22	Jabalpur	23.13	29.27	4.6
1986-07-23	Jabalpur	22.5	29.89	6.4
1986-07-24	Jabalpur	22.3	27.45	3
1986-07-25	Jabalpur	22.15	27.72	0.5
1986-07-26	Jabalpur	21.78	26.32	0.9
1986-07-27	Jabalpur	20.85	24.49	1.6
1986-07-28	Jabalpur	20.87	25.87	0.3
1986-07-29	Jabalpur	20.89	25.39	4.5
1986-07-30	Jabalpur	21.93	28.54	0
1986-07-31	Jabalpur	22.54	28.95	0
1986-08-01	Jabalpur	23.13	29.92	11.2
1986-08-02	Jabalpur	23.12	30.06	5.2
1986-08-03	Jabalpur	22.76	29.09	17.2
1986-08-04	Jabalpur	22.25	28.73	49.3
1986-08-05	Jabalpur	22.15	29.33	22.1
1986-08-06	Jabalpur	22.12	28.53	9.6
1986-08-07	Jabalpur	23	29.42	2.6
1986-08-08	Jabalpur	22.85	29.18	10.5
1986-08-09	Jabalpur	23.76	30.58	5.1
1986-08-10	Jabalpur	23.68	31.56	13.8
1986-08-11	Jabalpur	23.78	31.73	3.5
1986-08-12	Jabalpur	24.1	32.33	1.6
1986-08-13	Jabalpur	23.06	29.86	2.8
1986-08-14	Jabalpur	23.4	30.38	36.5
1986-08-15	Jabalpur	23.03	29.24	3
1986-08-16	Jabalpur	22.43	29.24	6
1986-08-17	Jabalpur	22.84	28.48	2.7
1986-08-18	Jabalpur	22.4	26.52	5.3
1986-08-19	Jabalpur	22.16	25.06	1.2
1986-08-20	Jabalpur	22.65	27.85	0
1986-08-21	Jabalpur	22.63	28.29	10.4
1986-08-22	Jabalpur	21.97	26.28	25.2
1986-08-23	Jabalpur	21.66	28.83	0
1986-08-24	Jabalpur	22.06	29.08	0
1986-08-25	Jabalpur	21.32	29.61	0.4
1986-08-26	Jabalpur	20.9	29.78	0
1986-08-27	Jabalpur	20.53	30.23	0
1986-08-28	Jabalpur	20.76	30.54	0
1986-08-29	Jabalpur	21.7	31.17	0
1986-08-30	Jabalpur	22.48	31.71	1.7
1986-08-31	Jabalpur	22.73	32.17	0
1986-09-01	Jabalpur	23.13	32.25	0.4
1986-09-02	Jabalpur	22.82	32.48	0
1986-09-03	Jabalpur	22.43	32.65	0
1986-09-04	Jabalpur	21.8	32.67	0
1986-09-05	Jabalpur	21.94	32.19	0
1986-09-06	Jabalpur	22.84	32.78	0
1986-09-07	Jabalpur	23.16	33.32	0
1986-09-08	Jabalpur	23.26	34.34	0
1986-09-09	Jabalpur	23.16	34.5	0
1986-09-10	Jabalpur	23.37	34.39	0
1986-09-11	Jabalpur	23.23	31.9	2.8
1986-09-12	Jabalpur	22.01	29.55	12.5
1986-09-13	Jabalpur	22.34	28.31	9.3
1986-09-14	Jabalpur	22.22	28.72	17.9
1986-09-15	Jabalpur	21.89	29.07	3.6
1986-09-16	Jabalpur	21.79	30.83	0
1986-09-17	Jabalpur	22.25	32.44	0
1986-09-18	Jabalpur	22.57	33.49	0
1986-09-19	Jabalpur	22.5	34.65	0
1986-09-20	Jabalpur	22.53	34.86	0
1986-09-21	Jabalpur	22.11	34.31	0
1986-09-22	Jabalpur	22.32	34.65	0
1986-09-23	Jabalpur	22.26	33.6	0
1986-09-24	Jabalpur	21.56	32.57	0
1986-09-25	Jabalpur	21.88	31.56	0
1986-09-26	Jabalpur	21.16	30.98	0
1986-09-27	Jabalpur	20.64	29.51	0
1986-09-28	Jabalpur	20.22	29.93	0
1986-09-29	Jabalpur	19.44	29.7	0
1986-09-30	Jabalpur	19.24	29.79	7.8
1986-10-01	Jabalpur	19.87	31.32	0.8
1986-10-02	Jabalpur	20	31.96	0.8
1986-10-03	Jabalpur	20.49	32.38	0.8
1986-10-04	Jabalpur	20.98	32.2	0
1986-10-05	Jabalpur	21.33	31.94	2.1
1986-10-06	Jabalpur	20.78	30.91	0
1986-10-07	Jabalpur	20.24	30.49	0
1986-10-08	Jabalpur	20.1	30.72	0
1986-10-09	Jabalpur	19.84	32.68	0
1986-10-10	Jabalpur	20.53	33.75	0
1986-10-11	Jabalpur	20.89	34.19	0
1986-10-12	Jabalpur	21.45	35.06	0
1986-10-13	Jabalpur	20.9	34.48	0
1986-10-14	Jabalpur	19.44	34.75	0
1986-10-15	Jabalpur	18.32	35.25	0
1986-10-16	Jabalpur	21.05	34.96	0
1986-10-17	Jabalpur	19.57	34.56	0
1986-10-18	Jabalpur	19.34	34.18	0
1986-10-19	Jabalpur	20.51	33.66	4.8
1986-10-20	Jabalpur	19.42	33.5	0
1986-10-21	Jabalpur	17.22	32.75	0
1986-10-22	Jabalpur	13.7	31.39	0
1986-10-23	Jabalpur	12.77	30.36	0
1986-10-24	Jabalpur	13.4	30.05	0
1986-10-25	Jabalpur	13.03	30.01	0
1986-10-26	Jabalpur	13.24	29.92	0
1986-10-27	Jabalpur	13.02	29.96	0
1986-10-28	Jabalpur	13.32	30.7	0
1986-10-29	Jabalpur	13.31	31.35	0
1986-10-30	Jabalpur	14.52	31.9	0
1986-10-31	Jabalpur	13.91	31.36	0
1986-11-01	Jabalpur	15.32	30.53	0
1986-11-02	Jabalpur	16.16	30.6	0
1986-11-03	Jabalpur	15.73	30.85	0
1986-11-04	Jabalpur	17.14	30.39	0
1986-11-05	Jabalpur	16.05	29.53	0
1986-11-06	Jabalpur	13.79	30.14	0
1986-11-07	Jabalpur	13.29	30.2	0
1986-11-08	Jabalpur	15.31	29.8	0
1986-11-09	Jabalpur	16.07	29.62	0
1986-11-10	Jabalpur	13.98	29.92	0
1986-11-11	Jabalpur	12.88	30.41	0
1986-11-12	Jabalpur	13.09	31.99	0
1986-11-13	Jabalpur	13.79	31.84	0
1986-11-14	Jabalpur	14.51	32.66	0
1986-11-15	Jabalpur	14.8	33	0
1986-11-16	Jabalpur	15.3	32.99	0
1986-11-17	Jabalpur	15.83	32.08	0
1986-11-18	Jabalpur	13.99	31.01	0
1986-11-19	Jabalpur	10.56	28.78	0
1986-11-20	Jabalpur	9.15	28.11	0
1986-11-21	Jabalpur	9.11	27.92	0
1986-11-22	Jabalpur	9.49	28.42	0
1986-11-23	Jabalpur	9.94	29.05	0
1986-11-24	Jabalpur	10.92	29.52	0
1986-11-25	Jabalpur	10.38	29.9	0
1986-11-26	Jabalpur	10.95	29.6	0
1986-11-27	Jabalpur	12.36	30.55	0
1986-11-28	Jabalpur	12.86	29.98	0
1986-11-29	Jabalpur	13.38	30.6	0
1986-11-30	Jabalpur	13.09	30.55	0
1986-12-01	Jabalpur	12.01	28.82	0
1986-12-02	Jabalpur	10.13	27.05	0
1986-12-03	Jabalpur	9.55	26.16	0
1986-12-04	Jabalpur	8.51	26.02	0
1986-12-05	Jabalpur	8.5	27.07	0
1986-12-06	Jabalpur	8.78	26.69	0
1986-12-07	Jabalpur	8.61	26.9	0
1986-12-08	Jabalpur	8.93	27.22	0
1986-12-09	Jabalpur	9.47	27.48	0
1986-12-10	Jabalpur	10.73	27.82	0
1986-12-11	Jabalpur	12.39	27.89	0
1986-12-12	Jabalpur	14.21	25.72	0
1986-12-13	Jabalpur	14.23	26.83	6.7
1986-12-14	Jabalpur	11.71	27.43	0
1986-12-15	Jabalpur	8.48	25.03	0
1986-12-16	Jabalpur	10.58	24.15	0.1
1986-12-17	Jabalpur	11.04	20.31	3.8
1986-12-18	Jabalpur	14.17	21.01	0
1986-12-19	Jabalpur	13.07	22.12	2.2
1986-12-20	Jabalpur	11.25	18.8	0
1986-12-21	Jabalpur	7.67	19.7	0
1986-12-22	Jabalpur	8.16	22.62	0
1986-12-23	Jabalpur	8.85	24.59	0
1986-12-24	Jabalpur	10.57	23.57	3.6
1986-12-25	Jabalpur	9.32	19.09	11.1
1986-12-26	Jabalpur	8.09	20.84	5.6
1986-12-27	Jabalpur	8.91	20.98	0
1986-12-28	Jabalpur	9.46	20.85	0
1986-12-29	Jabalpur	6.83	22.9	0
1986-12-30	Jabalpur	7.97	23.4	0
1986-12-31	Jabalpur	6.6	24.15	0
1987-01-01	Jabalpur	4.83	22.3	0
1987-01-02	Jabalpur	5.07	23.21	0
1987-01-03	Jabalpur	6.31	24.43	0
1987-01-04	Jabalpur	7.29	25.17	0
1987-01-05	Jabalpur	7.47	26.43	0
1987-01-06	Jabalpur	9.46	27.38	0
1987-01-07	Jabalpur	9.23	27.28	0
1987-01-08	Jabalpur	9.31	26.26	0
1987-01-09	Jabalpur	11.89	25.21	6.6
1987-01-10	Jabalpur	10.82	22.51	0.4
1987-01-11	Jabalpur	11.98	22.38	23.9
1987-01-12	Jabalpur	12.64	21.12	4.8
1987-01-13	Jabalpur	10.46	20.87	0
1987-01-14	Jabalpur	12.14	22.4	0.1
1987-01-15	Jabalpur	11.29	21.01	0
1987-01-16	Jabalpur	13.12	23.37	0
1987-01-17	Jabalpur	14.16	23.65	0
1987-01-18	Jabalpur	12.86	24.98	0.1
1987-01-19	Jabalpur	12.06	21.49	0
1987-01-20	Jabalpur	8.86	21.1	0
1987-01-21	Jabalpur	6.7	21.35	0
1987-01-22	Jabalpur	6.86	22.42	0
1987-01-23	Jabalpur	9.95	23.63	0
1987-01-24	Jabalpur	9.92	24.55	0
1987-01-25	Jabalpur	7.7	24.02	0
1987-01-26	Jabalpur	6.81	24.54	0
1987-01-27	Jabalpur	6.69	24.78	0
1987-01-28	Jabalpur	7.03	25.21	0
1987-01-29	Jabalpur	7.21	25.16	0
1987-01-30	Jabalpur	8.41	25.89	0
1987-01-31	Jabalpur	10	27.54	0
1987-02-01	Jabalpur	10.61	27.73	0
1987-02-02	Jabalpur	10.57	28.04	0
1987-02-03	Jabalpur	11.05	27.47	0
1987-02-04	Jabalpur	10.72	26.61	0
1987-02-05	Jabalpur	8.79	25.71	0
1987-02-06	Jabalpur	7.7	25.4	0
1987-02-07	Jabalpur	8.23	25.86	0
1987-02-08	Jabalpur	8.62	26.85	0
1987-02-09	Jabalpur	9.36	27.48	0
1987-02-10	Jabalpur	10.08	28.79	0
1987-02-11	Jabalpur	9.79	29.26	0
1987-02-12	Jabalpur	9.95	29	0
1987-02-13	Jabalpur	10.73	29.9	0
1987-02-14	Jabalpur	11.88	30.55	0
1987-02-15	Jabalpur	12.99	31.56	0
1987-02-16	Jabalpur	14.7	30.32	12.1
1987-02-17	Jabalpur	13.61	28.94	1.5
1987-02-18	Jabalpur	13.96	27.1	8.2
1987-02-19	Jabalpur	12.9	26.97	0.1
1987-02-20	Jabalpur	15.02	29.03	0
1987-02-21	Jabalpur	15.63	29.17	4.3
1987-02-22	Jabalpur	15.57	29.24	0
1987-02-23	Jabalpur	15.24	30.13	6
1987-02-24	Jabalpur	16.11	30.38	0
1987-02-25	Jabalpur	16	29.57	0
1987-02-26	Jabalpur	16.26	29.92	1.5
1987-02-27	Jabalpur	12.74	26.44	18
1987-02-28	Jabalpur	14.28	26.17	10
1987-03-01	Jabalpur	12.33	27	0
1987-03-02	Jabalpur	11.77	27.52	0
1987-03-03	Jabalpur	12.71	27.13	0
1987-03-04	Jabalpur	12.46	27.95	0
1987-03-05	Jabalpur	13.55	29.11	0
1987-03-06	Jabalpur	14.71	30.37	0
1987-03-07	Jabalpur	15.4	31.68	0
1987-03-08	Jabalpur	15.75	32.81	0
1987-03-09	Jabalpur	16.26	33.32	0
1987-03-10	Jabalpur	15.96	32.72	0
1987-03-11	Jabalpur	17.62	32.25	0
1987-03-12	Jabalpur	14.38	29.41	0.3
1987-03-13	Jabalpur	14.19	28.4	0
1987-03-14	Jabalpur	15.21	30.58	0
1987-03-15	Jabalpur	16	32.17	0
1987-03-16	Jabalpur	17.8	33.51	0
1987-03-17	Jabalpur	17.96	33.62	0
1987-03-18	Jabalpur	17.11	33.52	0
1987-03-19	Jabalpur	15.94	32.89	0
1987-03-20	Jabalpur	19	34.76	0
1987-03-21	Jabalpur	16.37	33.13	0
1987-03-22	Jabalpur	17.39	33.44	0
1987-03-23	Jabalpur	18.17	34.47	0
1987-03-24	Jabalpur	18.48	35.69	0
1987-03-25	Jabalpur	18.23	35.51	0
1987-03-26	Jabalpur	21.56	36.72	0
1987-03-27	Jabalpur	19.64	33.54	0
1987-03-28	Jabalpur	17.61	35.41	0
1987-03-29	Jabalpur	18.19	35.72	0
1987-03-30	Jabalpur	18.91	36.32	0
1987-03-31	Jabalpur	19.77	36.18	0
1987-04-01	Jabalpur	20.81	37.35	0
1987-04-02	Jabalpur	21.31	37.6	0
1987-04-03	Jabalpur	22.58	37.57	0
1987-04-04	Jabalpur	21.15	37.64	0
1987-04-05	Jabalpur	21.36	37.52	0
1987-04-06	Jabalpur	20.35	37.37	0
1987-04-07	Jabalpur	19.83	37.65	0
1987-04-08	Jabalpur	21.36	38.65	0
1987-04-09	Jabalpur	24	38.25	0
1987-04-10	Jabalpur	22.07	36.76	0
1987-04-11	Jabalpur	20.45	36.05	0
1987-04-12	Jabalpur	20.49	36.02	0
1987-04-13	Jabalpur	18.63	36.3	0
1987-04-14	Jabalpur	19.39	37.61	0
1987-04-15	Jabalpur	19.17	36.79	0
1987-04-16	Jabalpur	20.8	37.77	0
1987-04-17	Jabalpur	21.12	39.26	0
1987-04-18	Jabalpur	20.31	39.59	0
1987-04-19	Jabalpur	21.85	39.81	0
1987-04-20	Jabalpur	21.77	40.22	0
1987-04-21	Jabalpur	22.95	40.52	0
1987-04-22	Jabalpur	25.35	41.21	0
1987-04-23	Jabalpur	25.64	41.7	0
1987-04-24	Jabalpur	26.53	41.39	0
1987-04-25	Jabalpur	24.55	39.98	0
1987-04-26	Jabalpur	23.05	39.12	0
1987-04-27	Jabalpur	21.89	38.87	0
1987-04-28	Jabalpur	21.87	39.16	0
1987-04-29	Jabalpur	22.38	38.5	0
1987-04-30	Jabalpur	23.55	39.48	0
1987-05-01	Jabalpur	24.74	40.64	0
1987-05-02	Jabalpur	25.59	40.03	0
1987-05-03	Jabalpur	20.31	37.3	2.5
1987-05-04	Jabalpur	20.13	33.96	1
1987-05-05	Jabalpur	20.05	35.54	0
1987-05-06	Jabalpur	21.97	37.75	0
1987-05-07	Jabalpur	24.61	39.59	0
1987-05-08	Jabalpur	24.11	38.87	0
1987-05-09	Jabalpur	23.98	38.37	1.2
1987-05-10	Jabalpur	22.14	37.53	0.6
1987-05-11	Jabalpur	21.08	37.08	0
1987-05-12	Jabalpur	22.68	38.03	0
1987-05-13	Jabalpur	22.94	38.98	0.1
1987-05-14	Jabalpur	23.44	38.42	0
1987-05-15	Jabalpur	22.81	35.65	0
1987-05-16	Jabalpur	23.14	37.7	0
1987-05-17	Jabalpur	23.73	38.49	0
1987-05-18	Jabalpur	24.15	40.21	0
1987-05-19	Jabalpur	24.65	40.84	0
1987-05-20	Jabalpur	26.24	41.8	0
1987-05-21	Jabalpur	26.78	41.8	0
1987-05-22	Jabalpur	27.42	42.08	0
1987-05-23	Jabalpur	27.86	42.05	0
1987-05-24	Jabalpur	26.07	41.09	0
1987-05-25	Jabalpur	25.94	41	0
1987-05-26	Jabalpur	26.81	41.87	0
1987-05-27	Jabalpur	25.56	42.19	6.7
1987-05-28	Jabalpur	27.41	39.57	0
1987-05-29	Jabalpur	26.74	40.19	0.3
1987-05-30	Jabalpur	27.22	40.88	0
1987-05-31	Jabalpur	28.05	40.89	0
1987-06-01	Jabalpur	28.27	41.63	0
1987-06-02	Jabalpur	29.03	42.09	0.4
1987-06-03	Jabalpur	29.26	42.74	0
1987-06-04	Jabalpur	27.96	42.82	0
1987-06-05	Jabalpur	27.77	42.13	1.8
1987-06-06	Jabalpur	27.62	42.44	0
1987-06-07	Jabalpur	29.23	42.66	7.4
1987-06-08	Jabalpur	28.47	42.41	0.6
1987-06-09	Jabalpur	25.16	42.12	3.8
1987-06-10	Jabalpur	25.33	37.66	2.8
1987-06-11	Jabalpur	24.37	38.59	18.4
1987-06-12	Jabalpur	24.96	37.44	4.5
1987-06-13	Jabalpur	25.24	36.84	4
1987-06-14	Jabalpur	26	36.91	0.2
1987-06-15	Jabalpur	27.48	38.39	0
1987-06-16	Jabalpur	25.55	39.37	2.1
1987-06-17	Jabalpur	26.01	36.24	0
1987-06-18	Jabalpur	25.61	37.18	9
1987-06-19	Jabalpur	25.47	35.84	3.4
1987-06-20	Jabalpur	25.77	38.63	0
1987-06-21	Jabalpur	27.03	39.58	0
1987-06-22	Jabalpur	27.14	39.87	0.1
1987-06-23	Jabalpur	25.37	39.39	2.8
1987-06-24	Jabalpur	25.91	39.39	0
1987-06-25	Jabalpur	26.48	39.45	0
1987-06-26	Jabalpur	25.57	39.48	1.6
1987-06-27	Jabalpur	26.65	40.42	4.4
1987-06-28	Jabalpur	26.46	39.59	0.1
1987-06-29	Jabalpur	26.93	39.78	0
1987-06-30	Jabalpur	26.93	36.68	0
1987-07-01	Jabalpur	25.12	38.77	8.6
1987-07-02	Jabalpur	23.38	37.46	12.4
1987-07-03	Jabalpur	24.08	36.17	0.4
1987-07-04	Jabalpur	23.45	35.79	38.8
1987-07-05	Jabalpur	23.79	33.9	2.2
1987-07-06	Jabalpur	24.52	33.43	0
1987-07-07	Jabalpur	22.56	33.57	54.8
1987-07-08	Jabalpur	22.82	32.68	0
1987-07-09	Jabalpur	22.1	33.57	0
1987-07-10	Jabalpur	21.58	33.27	4.5
1987-07-11	Jabalpur	22.48	33.28	8.2
1987-07-12	Jabalpur	22.89	33.09	16.6
1987-07-13	Jabalpur	22.81	32.58	11.1
1987-07-14	Jabalpur	21.48	28.28	2.5
1987-07-15	Jabalpur	21.96	29.4	0
1987-07-16	Jabalpur	22.68	31.76	0
1987-07-17	Jabalpur	23.3	32.97	0
1987-07-18	Jabalpur	24.73	32.1	0
1987-07-19	Jabalpur	22.46	33.34	0.5
1987-07-20	Jabalpur	23.57	32.6	2.7
1987-07-21	Jabalpur	22.84	31.9	2.5
1987-07-22	Jabalpur	23.06	32.54	8.5
1987-07-23	Jabalpur	24.45	33.13	0
1987-07-24	Jabalpur	24.37	34.32	0
1987-07-25	Jabalpur	24.15	35.6	8.9
1987-07-26	Jabalpur	23.24	34.07	0.6
1987-07-27	Jabalpur	23.24	32.95	21.9
1987-07-28	Jabalpur	22.08	33.75	14.9
1987-07-29	Jabalpur	21.55	30.51	9.7
1987-07-30	Jabalpur	23.11	32.05	0.2
1987-07-31	Jabalpur	24.7	32.22	0
1987-08-01	Jabalpur	25.44	33.34	0
1987-08-02	Jabalpur	25.24	33.3	0
1987-08-03	Jabalpur	25.53	33.86	0
1987-08-04	Jabalpur	23.45	34.84	0.3
1987-08-05	Jabalpur	23.24	33.03	2.3
1987-08-06	Jabalpur	22.12	29.57	19.4
1987-08-07	Jabalpur	22.9	30.48	15.4
1987-08-08	Jabalpur	23.2	31.46	2.7
1987-08-09	Jabalpur	24.17	32.14	0
1987-08-10	Jabalpur	24.84	33.32	11
1987-08-11	Jabalpur	25.28	33.56	0
1987-08-12	Jabalpur	24.81	33.15	0.2
1987-08-13	Jabalpur	23.85	33.22	11
1987-08-14	Jabalpur	23.18	33.63	2.6
1987-08-15	Jabalpur	22.96	33.55	1.3
1987-08-16	Jabalpur	23.36	32.39	0
1987-08-17	Jabalpur	24.42	33.56	0
1987-08-18	Jabalpur	24.98	34.26	1.1
1987-08-19	Jabalpur	23.82	34.52	0
1987-08-20	Jabalpur	22.55	33.71	1.9
1987-08-21	Jabalpur	23.37	32.89	7.5
1987-08-22	Jabalpur	23.69	33.19	0
1987-08-23	Jabalpur	23.28	32.98	26
1987-08-24	Jabalpur	22.9	30.76	43.6
1987-08-25	Jabalpur	22.45	28.69	57.5
1987-08-26	Jabalpur	22.82	29.61	20.2
1987-08-27	Jabalpur	22.64	29.41	25.9
1987-08-28	Jabalpur	22.93	29.79	19.3
1987-08-29	Jabalpur	21.31	27.41	61.6
1987-08-30	Jabalpur	21.12	24.81	3.7
1987-08-31	Jabalpur	21.32	25.5	2.2
1987-09-01	Jabalpur	22.25	26.98	3
1987-09-02	Jabalpur	22.57	28.03	9.5
1987-09-03	Jabalpur	22.65	30.15	1.9
1987-09-04	Jabalpur	22.71	30.77	0
1987-09-05	Jabalpur	22.41	29.99	0.9
1987-09-06	Jabalpur	21.71	28.41	9.2
1987-09-07	Jabalpur	22.53	28.6	10.3
1987-09-08	Jabalpur	22.27	27.52	10.2
1987-09-09	Jabalpur	20.23	26.61	42.9
1987-09-10	Jabalpur	21.97	27.64	12.2
1987-09-11	Jabalpur	21.45	29.36	13.9
1987-09-12	Jabalpur	21.83	30.98	1.2
1987-09-13	Jabalpur	21.6	31.15	0.2
1987-09-14	Jabalpur	21.8	31.92	3.7
1987-09-15	Jabalpur	22	30.7	43
1987-09-16	Jabalpur	20.39	28.47	105.9
1987-09-17	Jabalpur	20.78	27.38	1.7
1987-09-18	Jabalpur	21.59	29.05	0.4
1987-09-19	Jabalpur	21.85	30.09	0
1987-09-20	Jabalpur	22.29	30.81	3.3
1987-09-21	Jabalpur	22.12	30.18	0.5
1987-09-22	Jabalpur	21.36	31.29	0
1987-09-23	Jabalpur	21.73	32.13	0
1987-09-24	Jabalpur	21.78	32.42	0
1987-09-25	Jabalpur	22.2	33.1	0
1987-09-26	Jabalpur	21.57	34.28	0
1987-09-27	Jabalpur	21.99	35.12	0
1987-09-28	Jabalpur	22.14	35.21	0
1987-09-29	Jabalpur	22.04	34.67	0
1987-09-30	Jabalpur	20.95	34.66	0
1987-10-01	Jabalpur	21.5	35.46	0
1987-10-02	Jabalpur	20.55	34.6	0
1987-10-03	Jabalpur	21.18	34.46	0
1987-10-04	Jabalpur	21.05	34.11	0
1987-10-05	Jabalpur	19.16	30.59	4.2
1987-10-06	Jabalpur	19.36	28.62	0.4
1987-10-07	Jabalpur	19.41	30.61	0
1987-10-08	Jabalpur	18.74	31.4	0
1987-10-09	Jabalpur	18.74	32.02	0
1987-10-10	Jabalpur	18.91	33.19	0
1987-10-11	Jabalpur	19.03	34.12	0
1987-10-12	Jabalpur	19.52	34.49	0
1987-10-13	Jabalpur	19.06	34.65	0
1987-10-14	Jabalpur	18.63	34.99	0.4
1987-10-15	Jabalpur	17.83	34.69	0
1987-10-16	Jabalpur	18.34	33.51	0
1987-10-17	Jabalpur	19.78	32.56	17.2
1987-10-18	Jabalpur	20	30.16	11.7
1987-10-19	Jabalpur	20.14	30.36	17.6
1987-10-20	Jabalpur	18.32	28.05	9.6
1987-10-21	Jabalpur	17.14	29.68	0
1987-10-22	Jabalpur	14.51	29.84	0
1987-10-23	Jabalpur	13.71	29.61	0
1987-10-24	Jabalpur	13.88	29.93	0
1987-10-25	Jabalpur	14.05	30.33	0
1987-10-26	Jabalpur	13.98	29.93	0
1987-10-27	Jabalpur	13.86	29.49	0
1987-10-28	Jabalpur	13.73	29.82	0
1987-10-29	Jabalpur	15.15	30.46	0
1987-10-30	Jabalpur	16.33	32.01	0
1987-10-31	Jabalpur	16.31	33.08	0
1987-11-01	Jabalpur	15.65	33.12	0
1987-11-02	Jabalpur	14.64	32.38	0
1987-11-03	Jabalpur	15	31.03	0
1987-11-04	Jabalpur	14.71	29.61	0
1987-11-05	Jabalpur	15.63	27.68	0
1987-11-06	Jabalpur	14.8	29.6	0
1987-11-07	Jabalpur	12.03	28.85	0
1987-11-08	Jabalpur	11.69	28.83	0
1987-11-09	Jabalpur	11.17	28.14	0
1987-11-10	Jabalpur	11.72	28.23	0
1987-11-11	Jabalpur	12.08	29.19	0
1987-11-12	Jabalpur	11.94	28.85	0
1987-11-13	Jabalpur	14.28	28.22	0
1987-11-14	Jabalpur	16.43	27.39	0
1987-11-15	Jabalpur	16.62	26.98	0.1
1987-11-16	Jabalpur	13.62	27.67	0
1987-11-17	Jabalpur	13.85	28.94	0
1987-11-18	Jabalpur	16.03	29.19	2.5
1987-11-19	Jabalpur	14.27	27.55	10.5
1987-11-20	Jabalpur	12.47	26.59	0
1987-11-21	Jabalpur	11.61	28	0
1987-11-22	Jabalpur	10.34	27.22	0
1987-11-23	Jabalpur	9.26	27.92	0
1987-11-24	Jabalpur	9.27	27.69	0
1987-11-25	Jabalpur	9.6	28.09	0
1987-11-26	Jabalpur	10.67	28.86	0
1987-11-27	Jabalpur	10.6	29.72	0
1987-11-28	Jabalpur	11.26	29.61	0
1987-11-29	Jabalpur	9.55	28.6	0
1987-11-30	Jabalpur	9.54	27.81	0
1987-12-01	Jabalpur	9.53	27.82	0
1987-12-02	Jabalpur	9.47	28.13	0
1987-12-03	Jabalpur	9.75	28.63	0
1987-12-04	Jabalpur	9.94	28.35	0
1987-12-05	Jabalpur	9.57	27.65	0
1987-12-06	Jabalpur	8.73	27.13	0
1987-12-07	Jabalpur	7.51	25.97	0
1987-12-08	Jabalpur	6.77	25.8	0
1987-12-09	Jabalpur	7.17	25.47	0
1987-12-10	Jabalpur	8.57	25.89	0
1987-12-11	Jabalpur	10.48	28.24	0
1987-12-12	Jabalpur	12.5	29.02	0.3
1987-12-13	Jabalpur	10.32	24.45	4.3
1987-12-14	Jabalpur	6.72	21.18	0
1987-12-15	Jabalpur	6.5	22.55	0
1987-12-16	Jabalpur	6.54	23.43	0
1987-12-17	Jabalpur	6.75	23.34	0
1987-12-18	Jabalpur	6.39	23.57	0
1987-12-19	Jabalpur	6.45	24.07	0
1987-12-20	Jabalpur	6	24.22	0
1987-12-21	Jabalpur	6.81	23.37	0
1987-12-22	Jabalpur	7.8	24.2	0
1987-12-23	Jabalpur	7.45	24.61	0
1987-12-24	Jabalpur	7.46	25.52	0
1987-12-25	Jabalpur	7.43	25.01	0
1987-12-26	Jabalpur	7.19	25.54	0
1987-12-27	Jabalpur	6.86	25.97	0
1987-12-28	Jabalpur	7.41	25.58	0
1987-12-29	Jabalpur	6.71	25.1	0
1987-12-30	Jabalpur	8.25	24.97	0
1987-12-31	Jabalpur	8.26	26.21	0
1988-01-01	Jabalpur	7.39	25.65	0
1988-01-02	Jabalpur	7.69	25.06	0
1988-01-03	Jabalpur	6.75	25.05	0
1988-01-04	Jabalpur	6.61	24.82	0
1988-01-05	Jabalpur	7.88	25.01	0
1988-01-06	Jabalpur	9.41	27.08	0
1988-01-07	Jabalpur	9.24	26.08	0
1988-01-08	Jabalpur	8.61	25.71	0
1988-01-09	Jabalpur	8.38	25.77	0
1988-01-10	Jabalpur	8.64	26.04	0
1988-01-11	Jabalpur	8.74	25.48	0
1988-01-12	Jabalpur	10.25	27.48	0
1988-01-13	Jabalpur	11.89	25.51	2.3
1988-01-14	Jabalpur	11.5	23.52	4.7
1988-01-15	Jabalpur	11.03	24.11	0
1988-01-16	Jabalpur	11.73	25.75	0
1988-01-17	Jabalpur	9.57	25.26	0
1988-01-18	Jabalpur	8.64	25.37	0
1988-01-19	Jabalpur	9.12	25.78	0
1988-01-20	Jabalpur	8.4	25.76	0
1988-01-21	Jabalpur	9.5	27.5	0
1988-01-22	Jabalpur	11.07	28.55	0
1988-01-23	Jabalpur	12.66	28.55	0
1988-01-24	Jabalpur	11.97	27.53	0
1988-01-25	Jabalpur	10.87	28.21	0
1988-01-26	Jabalpur	7.19	24.84	0
1988-01-27	Jabalpur	7.71	24.01	0
1988-01-28	Jabalpur	7.78	24.61	0
1988-01-29	Jabalpur	8.52	27.81	0
1988-01-30	Jabalpur	8.54	27.27	0
1988-01-31	Jabalpur	9.06	27.98	0
1988-02-01	Jabalpur	9.26	27.35	0
1988-02-02	Jabalpur	9.71	26.94	0
1988-02-03	Jabalpur	8.12	26.13	0
1988-02-04	Jabalpur	6.93	26.77	0
1988-02-05	Jabalpur	7.47	28.17	0
1988-02-06	Jabalpur	8.96	28.52	0
1988-02-07	Jabalpur	10.44	29.59	0
1988-02-08	Jabalpur	11.68	31.06	0
1988-02-09	Jabalpur	11.83	30.69	0
1988-02-10	Jabalpur	12.04	31.22	0
1988-02-11	Jabalpur	12.69	31.36	0
1988-02-12	Jabalpur	16.78	32.44	0
1988-02-13	Jabalpur	13.74	28.63	1.5
1988-02-14	Jabalpur	14.92	30.38	4
1988-02-15	Jabalpur	14.47	28.2	1.4
1988-02-16	Jabalpur	14.07	27.39	0
1988-02-17	Jabalpur	13.26	27.51	0
1988-02-18	Jabalpur	11.57	27.24	0
1988-02-19	Jabalpur	11.94	28.02	0
1988-02-20	Jabalpur	12.42	28.95	0
1988-02-21	Jabalpur	13.76	29.95	0
1988-02-22	Jabalpur	15.75	32.16	0
1988-02-23	Jabalpur	15.49	32.4	0
1988-02-24	Jabalpur	13.81	30.58	0
1988-02-25	Jabalpur	11.38	27.64	0
1988-02-26	Jabalpur	10.79	28.97	0
1988-02-27	Jabalpur	13.03	30.31	0
1988-02-28	Jabalpur	15.65	32.07	0
1988-02-29	Jabalpur	15.77	31.76	0
1988-03-01	Jabalpur	15.14	31	0
1988-03-02	Jabalpur	14.96	29.92	0
1988-03-03	Jabalpur	13.57	29.9	0
1988-03-04	Jabalpur	13.59	29.94	0
1988-03-05	Jabalpur	15.1	31.94	0
1988-03-06	Jabalpur	15.21	33.27	0
1988-03-07	Jabalpur	15.53	33.6	0
1988-03-08	Jabalpur	17.3	34.63	0
1988-03-09	Jabalpur	17.93	35.26	0
1988-03-10	Jabalpur	17.71	33.72	1
1988-03-11	Jabalpur	18.75	34.02	0.8
1988-03-12	Jabalpur	18.11	35.75	6.2
1988-03-13	Jabalpur	18.59	34.33	0
1988-03-14	Jabalpur	17.51	34.61	0
1988-03-15	Jabalpur	15.31	32.72	0
1988-03-16	Jabalpur	17.46	34.5	0
1988-03-17	Jabalpur	19.24	36.04	0
1988-03-18	Jabalpur	19.88	36.57	0
1988-03-19	Jabalpur	19.18	34.66	0
1988-03-20	Jabalpur	15.53	34.33	0
1988-03-21	Jabalpur	13.47	31.69	0
1988-03-22	Jabalpur	13.24	32.19	0
1988-03-23	Jabalpur	14.16	33.71	0
1988-03-24	Jabalpur	15.99	34.93	0
1988-03-25	Jabalpur	17.3	36.75	0
1988-03-26	Jabalpur	18.91	37.16	0
1988-03-27	Jabalpur	19.26	36.2	0
1988-03-28	Jabalpur	16.58	34.38	0
1988-03-29	Jabalpur	15.95	33.41	0
1988-03-30	Jabalpur	16.46	35.33	0
1988-03-31	Jabalpur	17.36	36.43	0
1988-04-01	Jabalpur	17.46	37.14	0
1988-04-02	Jabalpur	17.19	37.48	0
1988-04-03	Jabalpur	18.19	38.02	0
1988-04-04	Jabalpur	20.68	40.11	0
1988-04-05	Jabalpur	21.08	40.03	0
1988-04-06	Jabalpur	21.5	39.49	0
1988-04-07	Jabalpur	21.92	40.23	0
1988-04-08	Jabalpur	22.26	39.14	0
1988-04-09	Jabalpur	23.11	36.85	0
1988-04-10	Jabalpur	21.31	38.41	0
1988-04-11	Jabalpur	21.68	40.55	0
1988-04-12	Jabalpur	22.52	40.53	0
1988-04-13	Jabalpur	23.06	41.31	0
1988-04-14	Jabalpur	22.03	41.32	0
1988-04-15	Jabalpur	22.97	41.24	0
1988-04-16	Jabalpur	23.75	41.6	0
1988-04-17	Jabalpur	24.98	41.26	0
1988-04-18	Jabalpur	24.7	40.97	0
1988-04-19	Jabalpur	22.89	40.22	2.4
1988-04-20	Jabalpur	22.64	39.5	0
1988-04-21	Jabalpur	21.22	38.09	0
1988-04-22	Jabalpur	22.18	37.95	0
1988-04-23	Jabalpur	22.67	38.43	0
1988-04-24	Jabalpur	22.88	38.8	0
1988-04-25	Jabalpur	24.01	39.12	0
1988-04-26	Jabalpur	23.96	38.74	0
1988-04-27	Jabalpur	24.87	40.32	0
1988-04-28	Jabalpur	25	40.54	0
1988-04-29	Jabalpur	25.64	40.25	0
1988-04-30	Jabalpur	24.64	40.1	0
1988-05-01	Jabalpur	26.14	40.13	0
1988-05-02	Jabalpur	24.78	39.98	0.2
1988-05-03	Jabalpur	22.75	36.81	74.1
1988-05-04	Jabalpur	23.26	39.14	2.2
1988-05-05	Jabalpur	23.87	39.14	2.9
1988-05-06	Jabalpur	24.28	41.23	0
1988-05-07	Jabalpur	26.03	42.64	0
1988-05-08	Jabalpur	25.4	43.18	0
1988-05-09	Jabalpur	25.56	43.75	0
1988-05-10	Jabalpur	25.74	43.84	0
1988-05-11	Jabalpur	27.3	43.67	0
1988-05-12	Jabalpur	28.01	44.08	0
1988-05-13	Jabalpur	27.25	43.55	0
1988-05-14	Jabalpur	26.28	43.09	0
1988-05-15	Jabalpur	27.33	43.8	0
1988-05-16	Jabalpur	26.74	43.17	0
1988-05-17	Jabalpur	26.9	42.43	0
1988-05-18	Jabalpur	26.69	43.27	0
1988-05-19	Jabalpur	25.84	42.67	0
1988-05-20	Jabalpur	25.92	41.19	0
1988-05-21	Jabalpur	26.38	41.55	0
1988-05-22	Jabalpur	26.38	41.56	0
1988-05-23	Jabalpur	28.04	42.22	0
1988-05-24	Jabalpur	26.56	42.66	0
1988-05-25	Jabalpur	27.94	42.98	0
1988-05-26	Jabalpur	27.58	43.73	0
1988-05-27	Jabalpur	28.47	44.26	0
1988-05-28	Jabalpur	28.87	44.5	0
1988-05-29	Jabalpur	29.26	45.2	0
1988-05-30	Jabalpur	28.99	44.87	0
1988-05-31	Jabalpur	30	45	0
1988-06-01	Jabalpur	28.75	43.67	2.6
1988-06-02	Jabalpur	28.01	42.96	0
1988-06-03	Jabalpur	26.74	41.89	0.6
1988-06-04	Jabalpur	26.23	41.71	0.5
1988-06-05	Jabalpur	25.92	41.41	0
1988-06-06	Jabalpur	26.1	41.02	0
1988-06-07	Jabalpur	24.19	40.12	0
1988-06-08	Jabalpur	24.7	40.83	0
1988-06-09	Jabalpur	24.68	41.46	0
1988-06-10	Jabalpur	26.21	41.78	0
1988-06-11	Jabalpur	26.45	41.88	0
1988-06-12	Jabalpur	26.1	41.52	0
1988-06-13	Jabalpur	26.52	41.31	0
1988-06-14	Jabalpur	25.91	41.62	0
1988-06-15	Jabalpur	26.4	39.71	0
1988-06-16	Jabalpur	24.15	39.16	6
1988-06-17	Jabalpur	24.34	36.43	0
1988-06-18	Jabalpur	25.16	37.59	0
1988-06-19	Jabalpur	24.37	37.93	2
1988-06-20	Jabalpur	22.92	36.69	3.7
1988-06-21	Jabalpur	25.11	36.42	0.3
1988-06-22	Jabalpur	23.68	36.5	5.9
1988-06-23	Jabalpur	22.52	34.65	39.2
1988-06-24	Jabalpur	21.88	34.24	5.5
1988-06-25	Jabalpur	21.83	31.3	10.6
1988-06-26	Jabalpur	22.04	33.46	18.7
1988-06-27	Jabalpur	22.98	29.05	14.8
1988-06-28	Jabalpur	20.3	31.23	116.1
1988-06-29	Jabalpur	21.32	26.91	11.6
1988-06-30	Jabalpur	22.21	29.18	4.7
1988-07-01	Jabalpur	22.88	31.7	0
1988-07-02	Jabalpur	23.84	32.28	4.4
1988-07-03	Jabalpur	22.9	32.3	24.7
1988-07-04	Jabalpur	22.27	30.52	22.5
1988-07-05	Jabalpur	22.68	28.71	5.1
1988-07-06	Jabalpur	22.67	30.17	9.7
1988-07-07	Jabalpur	22.39	30.72	14.6
1988-07-08	Jabalpur	21.75	29.96	6.7
1988-07-09	Jabalpur	21.6	29.15	11.1
1988-07-10	Jabalpur	22.19	30.46	3.4
1988-07-11	Jabalpur	23.14	31.15	0.5
1988-07-12	Jabalpur	22.43	31.74	11.4
1988-07-13	Jabalpur	22.5	28.36	60.3
1988-07-14	Jabalpur	21.66	28.26	2.9
1988-07-15	Jabalpur	22.33	28.95	0.7
1988-07-16	Jabalpur	23.43	30.41	0.5
1988-07-17	Jabalpur	23.77	32.15	0
1988-07-18	Jabalpur	23.36	32.99	0.3
1988-07-19	Jabalpur	23.35	32.36	5.4
1988-07-20	Jabalpur	23.06	30.48	7
1988-07-21	Jabalpur	23.29	30.67	8.5
1988-07-22	Jabalpur	22.97	30.52	23.4
1988-07-23	Jabalpur	22.77	31.77	3
1988-07-24	Jabalpur	22.67	29.97	3.5
1988-07-25	Jabalpur	22.97	30.96	3.4
1988-07-26	Jabalpur	22.39	28.27	38.4
1988-07-27	Jabalpur	22.03	28.29	28.2
1988-07-28	Jabalpur	22.21	28.77	1.5
1988-07-29	Jabalpur	22.71	29.62	0
1988-07-30	Jabalpur	22.99	31.27	1.7
1988-07-31	Jabalpur	23.17	30.99	0.9
1988-08-01	Jabalpur	22.4	28.85	76.1
1988-08-02	Jabalpur	22.52	27.63	75.7
1988-08-03	Jabalpur	23.17	27.59	22.6
1988-08-04	Jabalpur	22.98	28.44	114.1
1988-08-05	Jabalpur	22.68	26.86	18.5
1988-08-06	Jabalpur	23.36	30.36	0
1988-08-07	Jabalpur	23.62	30.69	0
1988-08-08	Jabalpur	23.47	29.93	0
1988-08-09	Jabalpur	22.51	30.18	7.7
1988-08-10	Jabalpur	23.19	28.6	5
1988-08-11	Jabalpur	22.55	27.09	28
1988-08-12	Jabalpur	22.98	27.42	12.2
1988-08-13	Jabalpur	23.5	30.21	7.2
1988-08-14	Jabalpur	23.5	29.64	0.8
1988-08-15	Jabalpur	22.74	30.12	0
1988-08-16	Jabalpur	22.95	30.8	4.2
1988-08-17	Jabalpur	23.57	30.87	4.9
1988-08-18	Jabalpur	23.48	31	11.7
1988-08-19	Jabalpur	22.95	31.18	17.3
1988-08-20	Jabalpur	23.65	31	8
1988-08-21	Jabalpur	24.34	31.95	3.8
1988-08-22	Jabalpur	23.91	32.47	31
1988-08-23	Jabalpur	23.29	31.18	24.2
1988-08-24	Jabalpur	23.18	30.09	14.3
1988-08-25	Jabalpur	22.6	28.27	15.7
1988-08-26	Jabalpur	23.43	29.52	2.8
1988-08-27	Jabalpur	23.43	30.54	7
1988-08-28	Jabalpur	23.1	31.19	9.4
1988-08-29	Jabalpur	23.23	31.36	10
1988-08-30	Jabalpur	23.17	31.77	0.4
1988-08-31	Jabalpur	23.89	32.37	0
1988-09-01	Jabalpur	23.67	33.41	0
1988-09-02	Jabalpur	23.71	33.23	0
1988-09-03	Jabalpur	23.61	33.15	2.3
1988-09-04	Jabalpur	23.44	33.15	0
1988-09-05	Jabalpur	24.01	33.47	0.9
1988-09-06	Jabalpur	23.03	33.32	1.8
1988-09-07	Jabalpur	22.86	32.49	4.9
1988-09-08	Jabalpur	23.75	32	0
1988-09-09	Jabalpur	23.14	32.69	0
1988-09-10	Jabalpur	23.25	32.37	5.3
1988-09-11	Jabalpur	23.64	31.7	2
1988-09-12	Jabalpur	23.55	32.96	2.5
1988-09-13	Jabalpur	23.81	33.45	0
1988-09-14	Jabalpur	23.72	34.18	2.4
1988-09-15	Jabalpur	22.8	34.66	13.1
1988-09-16	Jabalpur	21.39	33.85	2.2
1988-09-17	Jabalpur	21.9	31.07	0
1988-09-18	Jabalpur	22.44	30.7	3
1988-09-19	Jabalpur	22.05	30.73	7.9
1988-09-20	Jabalpur	22.42	30.75	0.4
1988-09-21	Jabalpur	22.57	30.65	4
1988-09-22	Jabalpur	22.44	30.44	1.2
1988-09-23	Jabalpur	23.04	31.53	0.8
1988-09-24	Jabalpur	23.59	30.46	5.6
1988-09-25	Jabalpur	23.48	31.02	6.7
1988-09-26	Jabalpur	23.28	32.38	1.3
1988-09-27	Jabalpur	23.71	33.38	0
1988-09-28	Jabalpur	23.43	33.28	0
1988-09-29	Jabalpur	21.84	32.49	0.1
1988-09-30	Jabalpur	22.26	31.94	0
1988-10-01	Jabalpur	21.5	32.02	0
1988-10-02	Jabalpur	22.84	31.95	4.1
1988-10-03	Jabalpur	23.1	29.68	0.8
1988-10-04	Jabalpur	23.17	30.13	0
1988-10-05	Jabalpur	22.83	31.38	14.1
1988-10-06	Jabalpur	20.39	29.91	7.8
1988-10-07	Jabalpur	18.85	30.59	0
1988-10-08	Jabalpur	18.29	30.56	0
1988-10-09	Jabalpur	19.11	30.55	0
1988-10-10	Jabalpur	18.13	30.75	0
1988-10-11	Jabalpur	17.38	31.08	0
1988-10-12	Jabalpur	15.51	30.95	0
1988-10-13	Jabalpur	16.05	31.17	0
1988-10-14	Jabalpur	17.09	31.53	0
1988-10-15	Jabalpur	17.82	33.3	0
1988-10-16	Jabalpur	17.45	33.45	0
1988-10-17	Jabalpur	17.5	33.26	0
1988-10-18	Jabalpur	16.52	33.3	0
1988-10-19	Jabalpur	15.88	32.94	0
1988-10-20	Jabalpur	16.14	32.4	0
1988-10-21	Jabalpur	17.15	32.8	0
1988-10-22	Jabalpur	16.28	33.36	0
1988-10-23	Jabalpur	16	32.67	0
1988-10-24	Jabalpur	14.98	32.5	0
1988-10-25	Jabalpur	15.42	32.91	0
1988-10-26	Jabalpur	15.68	32.9	0
1988-10-27	Jabalpur	15.05	32.51	0
1988-10-28	Jabalpur	14.76	32.01	0
1988-10-29	Jabalpur	14.41	31.81	0
1988-10-30	Jabalpur	15.54	31.65	0
1988-10-31	Jabalpur	17.26	31.21	0
1988-11-01	Jabalpur	16.73	31.51	0
1988-11-02	Jabalpur	15.45	31.93	0
1988-11-03	Jabalpur	16.12	31.86	0
1988-11-04	Jabalpur	16	29.94	0
1988-11-05	Jabalpur	14.59	30.09	0
1988-11-06	Jabalpur	13.3	30.91	0
1988-11-07	Jabalpur	12.91	30.71	0
1988-11-08	Jabalpur	12.16	29.9	0
1988-11-09	Jabalpur	12.53	30.24	0
1988-11-10	Jabalpur	12.44	30.82	0
1988-11-11	Jabalpur	11.93	30.17	0
1988-11-12	Jabalpur	12.19	29.77	0
1988-11-13	Jabalpur	12.08	28.81	0
1988-11-14	Jabalpur	11.91	28.76	0
1988-11-15	Jabalpur	11.78	28.6	0
1988-11-16	Jabalpur	11.63	29.11	0
1988-11-17	Jabalpur	11.88	29.17	0
1988-11-18	Jabalpur	11.74	29	0
1988-11-19	Jabalpur	12.81	28.96	0
1988-11-20	Jabalpur	11.79	28.17	0
1988-11-21	Jabalpur	10.06	27.85	0
1988-11-22	Jabalpur	10.86	27.87	0
1988-11-23	Jabalpur	12.47	28.77	0
1988-11-24	Jabalpur	12.83	28.79	0
1988-11-25	Jabalpur	12.45	29.6	0
1988-11-26	Jabalpur	12.85	29.26	0
1988-11-27	Jabalpur	11.87	27.06	0
1988-11-28	Jabalpur	11.13	24.88	0
1988-11-29	Jabalpur	8.1	25.57	0
1988-11-30	Jabalpur	6.71	23.37	0
1988-12-01	Jabalpur	8.32	24.71	0
1988-12-02	Jabalpur	9.68	26.5	0
1988-12-03	Jabalpur	9.55	27.28	0
1988-12-04	Jabalpur	7.98	26.24	0
1988-12-05	Jabalpur	7.12	25.92	0
1988-12-06	Jabalpur	6.84	25.84	0
1988-12-07	Jabalpur	8.02	25.54	0
1988-12-08	Jabalpur	8.03	25.56	0
1988-12-09	Jabalpur	8.2	26.16	0
1988-12-10	Jabalpur	8.34	26.85	0
1988-12-11	Jabalpur	8.48	27.07	0
1988-12-12	Jabalpur	8.5	26.69	0
1988-12-13	Jabalpur	10.13	26.78	0
1988-12-14	Jabalpur	8.94	23.13	0
1988-12-15	Jabalpur	8.79	27.43	0
1988-12-16	Jabalpur	9.62	28.11	0
1988-12-17	Jabalpur	9.72	28.53	0
1988-12-18	Jabalpur	9.47	28.67	0
1988-12-19	Jabalpur	9.92	28.45	0
1988-12-20	Jabalpur	9.59	28.2	0
1988-12-21	Jabalpur	10.04	28.47	0
1988-12-22	Jabalpur	10.34	28.59	0
1988-12-23	Jabalpur	11.1	29.01	0
1988-12-24	Jabalpur	11.42	28.73	0
1988-12-25	Jabalpur	13.79	28.75	0
1988-12-26	Jabalpur	13.21	27.08	0.6
1988-12-27	Jabalpur	9.15	22.24	0
1988-12-28	Jabalpur	7.06	21.55	0
1988-12-29	Jabalpur	6.59	22.93	0
1988-12-30	Jabalpur	6.87	23.37	0
1988-12-31	Jabalpur	7.35	24.76	0
1989-01-01	Jabalpur	7.32	26.11	0
1989-01-02	Jabalpur	9.11	26.99	0
1989-01-03	Jabalpur	10.65	27.92	0
1989-01-04	Jabalpur	7.55	25.35	0
1989-01-05	Jabalpur	6.99	24.05	0
1989-01-06	Jabalpur	9.43	26.18	0
1989-01-07	Jabalpur	13.09	28.78	0
1989-01-08	Jabalpur	13.29	28.04	0
1989-01-09	Jabalpur	7.58	23.81	0
1989-01-10	Jabalpur	4.22	21.55	0
1989-01-11	Jabalpur	3.51	20.83	0
1989-01-12	Jabalpur	3.27	21.3	0
1989-01-13	Jabalpur	4.07	21.46	0
1989-01-14	Jabalpur	5.95	24.45	0
1989-01-15	Jabalpur	7.16	25.5	0
1989-01-16	Jabalpur	7.37	25.03	0
1989-01-17	Jabalpur	6.17	24.38	0
1989-01-18	Jabalpur	6.05	23.59	0
1989-01-19	Jabalpur	7.42	24.28	0
1989-01-20	Jabalpur	7.07	24.53	0
1989-01-21	Jabalpur	5.83	23.48	0
1989-01-22	Jabalpur	5.28	22.62	0
1989-01-23	Jabalpur	3.9	23.3	0
1989-01-24	Jabalpur	3.86	23.03	0
1989-01-25	Jabalpur	4.95	24.44	0
1989-01-26	Jabalpur	6.49	25.89	0
1989-01-27	Jabalpur	8.35	27.53	0
1989-01-28	Jabalpur	7.75	27.05	0
1989-01-29	Jabalpur	7.54	26.28	0
1989-01-30	Jabalpur	6.09	26.58	0
1989-01-31	Jabalpur	6.67	27.41	0
1989-02-01	Jabalpur	9.27	30.53	0
1989-02-02	Jabalpur	10.18	31.5	0
1989-02-03	Jabalpur	9.03	28.66	0
1989-02-04	Jabalpur	9.71	30.29	0
1989-02-05	Jabalpur	11.1	30.61	0
1989-02-06	Jabalpur	13.53	31.26	0
1989-02-07	Jabalpur	11.89	29.57	0
1989-02-08	Jabalpur	10.24	28.57	0
1989-02-09	Jabalpur	9.79	27.97	0
1989-02-10	Jabalpur	9.27	27.38	0
1989-02-11	Jabalpur	8.36	25.75	0
1989-02-12	Jabalpur	8.35	25.41	0
1989-02-13	Jabalpur	8.48	25.98	0
1989-02-14	Jabalpur	11.62	29.07	0
1989-02-15	Jabalpur	12.02	29.18	0
1989-02-16	Jabalpur	13.67	28.33	0
1989-02-17	Jabalpur	13.16	29.08	0
1989-02-18	Jabalpur	12.19	27.66	0
1989-02-19	Jabalpur	8.1	26.93	0
1989-02-20	Jabalpur	6.61	23.29	0
1989-02-21	Jabalpur	8.22	25.78	0
1989-02-22	Jabalpur	9.72	28.85	0
1989-02-23	Jabalpur	8.7	25.92	0
1989-02-24	Jabalpur	9.28	26.95	0
1989-02-25	Jabalpur	11.24	29.55	0
1989-02-26	Jabalpur	13.73	32.48	0
1989-02-27	Jabalpur	14.8	35.06	0
1989-02-28	Jabalpur	15.74	35.39	0
1989-03-01	Jabalpur	15.32	34.64	0
1989-03-02	Jabalpur	12.88	32.88	0
1989-03-03	Jabalpur	12.43	31.59	0
1989-03-04	Jabalpur	11.34	30.31	0
1989-03-05	Jabalpur	12.12	29.87	0
1989-03-06	Jabalpur	13.42	30.96	0
1989-03-07	Jabalpur	15.62	32.09	0
1989-03-08	Jabalpur	16.14	29.93	2.8
1989-03-09	Jabalpur	15.13	29.65	7.4
1989-03-10	Jabalpur	16.63	31.78	3
1989-03-11	Jabalpur	14.32	28.02	1.8
1989-03-12	Jabalpur	14.01	30.41	0
1989-03-13	Jabalpur	14.23	30.94	0
1989-03-14	Jabalpur	16.8	31.95	0
1989-03-15	Jabalpur	15.06	32.3	0
1989-03-16	Jabalpur	15.5	32.39	0
1989-03-17	Jabalpur	15.46	32.12	0
1989-03-18	Jabalpur	17.13	32.74	0
1989-03-19	Jabalpur	17.72	34.75	0
1989-03-20	Jabalpur	18.02	36.11	0
1989-03-21	Jabalpur	19.44	36.4	0
1989-03-22	Jabalpur	20.2	37.42	0
1989-03-23	Jabalpur	20.21	36.55	0
[truncated: 9,049 more rows]

## Sheet: Junagadh
Day	Center	Min. Temperature	Max. Temperature	Rainfall
[truncated: 10,958 more rows]

[truncated: 10 more sheets: Kanpur, Karnal, Ludhiana, Malda, Niphad, Parbhani, Pune, Ranchi, Kalyani, Patna]
