# Supplementary material for: Identification of climate change induced heat stress sensitive environments and prediction for diverse representative concentration pathways – A novel approach for tracking hotspots
Source: Research Square preprint supplement (doi:10.21203/rs.3.rs-308962/v1), 2021-03-17
Supplement: Supplementary file 2 [file afbb5a40b61ca98bcbff9e2b.xlsx]

## Sheet: Historical
Dharwad	Durgapura	Faizabad	Hisar	Indore	Jabalpur	Junagarh	Kalyani	Kanpur	Karnal	Ludhiana	Malda	Niphad	Parbhani	Patna	Pune	Ranchi
0.1	0.1	0.1	6.8	0.1	0.4	0	0	0.1	0.8	0.6	0	0	0.2	0	0.1	0
0.1	0.1	22.68	0.7	0.1	1.4	0	0	4.7	0.1	0.1	0.1	0	0.1	4.1	0	0.1
0.1	0	1.2	0	0	0.1	0	1.3	0.1	0	0	1.4	0	0	6.3	0	2.2
0	0	0	0	0	0	0	3.4	0	0	0	0	0	0	0	0	0
0	0	0	0	0	0	0	0	0	0.1	0.1	0	0	0	0	0	0
0	0	0	0.5	0	0	0	0	0	2.6	2.09	0	0	0	0	0	0
0	0	0	0	0	0	0	0	0	0	0	0	0	0	0	0	0
0.1	0.1	0	0.1	0	0	0	0	0	0	0	0	0	0	0	0	0
0.1	0.5	0	21.1	2.6	0	0	0	0.1	4.85	4.43	0	0.1	0.1	0	0.1	0
0.1	0	0.1	0	0.1	0.1	0	0	1.6	0.1	0.1	0	0	0.1	0	0.1	0
0.1	0	0	0	0	0	0	0	0	0	0	0	0.1	0.1	0	0.1	0
0.1	0	0	0	0.1	0	0	0	0	0	0	0	0.3	0.1	0	0.1	0
0	0	0	0	0.1	0	0	0	0	0	0	0	0.1	0	0	0.1	0
0	0	0	0	0.1	0.1	0	0	0	0	0	0	0.3	0	0	0.1	0
0	0	0	0	0.1	0	0	0	0	0	0	0	0.1	0	0	0	0
0	0	0	0	0	0	0	0	0	0	0	0	0	0	0	0	0
0	0	0	0	0	0	0	0	0	0	0	0	0	0	0	0	0
0	0	0	0	0	0	0	0	0	0	0	0	0	0	0	0	0
0	0	0	0	0	0	0	0	0	0	0	0	0	0	0	0	0
0	0	0	0	0	0	0	0	0	0	0	0	0	0	0	0	0
0	0	0	0	0	0	0	0.1	0	0	0	0	0	0	0	0	0
0	0	0	0	0	0	0	0.4	0	0	0	0	0	0	0	0	0
0	0	0	0	0	0	0	0	0	0	0	0	0	0	0	0	0
0	0	0	0	0	0	0	0	0	0	0	0	0	0	0	0	0
0	0	0	0	0	0	0	0	0	0.1	0.1	0	0	0	0	0	0
0	0	0	0.1	0	0	0	0	0	0.2	0.1	0	0	0	0	0	0
0	0	0.1	0.1	0	0.1	0	0	0.1	1.8	1.4	0	0	0	0	0	0
0	0	3	0	0	0.1	0	0	0.1	0	0	0	0	0	0.1	0	0
0	0	0	0	0	0	0	0.3	0	0	0	0.1	0	0	0.1	0	0.1
0	0	0	0	0	0	0	0.2	0	0	0	0	0	0	0	0	0
0	0	0	0	0	0	0	0	0	0	0	0	0	0	0	0	0
0	0	0	0	0	0	0	0	0	0	0	0	0	0	0	0	0
0	0	0	0	0	0	0	0	0	0	0	0	0	0	0	0	0
0	0	0	0	0	0	0	0	0	0	0	0	0	0	0	0	0
0	0	0	0	0	0	0	0	0	0	0	0	0	0	0	0	0
0	0	0	0	0	0	0	0	0	0	0	0	0	0	0	0	0
0	0	0	0	0	0	0	0	0	0	0	0	0	0	0	0	0
0	0.1	0	8.4	0.1	0	0	0	0.1	4.5	4.1	0	0	0	0	0	0
0	0	16.5	0	0	0.1	0	0	4.7	0.1	0.1	0	0	0	0.1	0	0
0	0	0	0	0	0.1	0	0	0	0.1	0.1	0	0.1	0	0	0.1	0
0	0.1	8.66	0	0.1	0.4	0	0	1.85	0.1	0.1	0	0.1	0.1	5.2	0.1	0.9
0.1	0	0.1	0	0	0.1	0	2.41	0.1	0	0	7.8	0	0.1	6.9	0.1	2
0	0	0	0	0	0	0	0	0	0	0	0	0	0.1	0	0	0
0	0	0	0	0	0.1	0	0	0	0	0	0	0	0.1	0	0	0.1
0	0.1	0	0.1	0.1	0.1	0	0	0.1	0.1	0.1	0	0	0.1	0	0	0.1
0	0.1	0	0.1	0.1	0.1	0	0	0.3	0.1	0.1	0	0	0.1	0	0	1.6
0.1	0.1	3.9	0.3	0	4.57	0	0	2.6	0.1	0.1	0	0	2.1	0.1	0	0.1
0	0	37.72	4.69	0	0.2	0	0	6.6	32.36	37.7	2.23	0	0.1	37.23	0	0.1
0	0	12.5	0.1	0	0	0	20.2	0.1	0.1	0.1	12.4	0	0	12.72	0	5.3
0	0	2.22	0	0	0.1	0	51.73	0	0	0	0.25	0	0	1.95	0	1.5
0	0	0	0	0	0	0	0.1	0	0	0	0	0	0	0	0	0
0	0	0	0	0	0	0	0	0	0.1	0.1	0	0	0	0	0	0
0.1	0	0	0	0	0.1	0	0	0.1	0	0	0	0	0.1	0	0	0
0.1	0.1	9.43	0.1	0.1	4.2	0	0	0.4	0.1	0.1	0	0.1	11.74	0.1	0.1	0.3
0	0.1	30.63	50.5	0	7.1	0	0.1	18.35	23.9	25.14	0.1	0	0.3	10.67	0	0.3
0	0.1	18.78	15.15	0	0	0	0.1	0.1	8.4	8.2	1.1	0	0	6.7	0	2.2
0	0	0.1	0.1	0	0	0	0.62	0.1	0	0	0	0	0	0.1	0	0.3
0	0	0.1	0	0	0	0	5.8	0.1	0.1	0.1	0	0	0.1	0.1	0	6.75
0.1	0.1	0	0.4	0	0	0	3.33	0	2.1	1.6	0.1	0	0.1	0	0	2.2
0.1	0.1	3.1	2.27	0	0.1	0	0	1.7	1.1	0.9	0.1	0	0.1	0.1	0.1	0.1
0.1	0	0	0	0	0	0	0	0	0	0	0	0	0.1	0	0.1	0.1
0.1	0	0	0	0	0	0	0	0	0.1	0.1	0	0.1	0.1	0	0.1	0
0	0	0	0	0	0	0	0	0	0	0	0	0	0	0	0.1	0
0	0	0	0	0	0	0	0	0	0	0	0	0	0	0	0.1	0
0	0	0	0	0	0	0.1	0	0	0	0	0	0	0	0	0	0
0	0	0	0	0	0	0	0	0	0	0	0	0	0	0	0	0
0	0.1	0	0.1	0	0	0	0	0.1	0.1	0.1	0	0	0	0	0	0
0	0	0.4	0	0	0.1	0	0	0.1	0	0	0	0	0	0.1	0	0.1
0	0	0	0	0	0	0	0.1	0	0	0	0	0	0	0	0	0.1
0	0	0	0	0	0	0	0	0	0	0	0	0	0	0	0.1	0
0.1	0	0	0	0	0	0	0	0	0	0	0	0.1	0	0	0.1	0
0.1	0	0	0	0	0	0	0	0	0	0	0	0.1	0	0	0.1	0
0.1	0.1	0	0.1	0.1	0.1	0	0	0	0.1	0.1	0	0	0	0	0.1	0
0	0.1	0.1	0.1	0.1	0.1	0	0	0.6	0.1	0.1	0	0.1	0.1	0	0.1	0
0.1	0.1	7.96	0	1.37	1.2	0	0	2.4	0	0	0.1	0.1	0.1	3.6	0.1	1.7
0.1	0	3.1	0	0	0	0	0.7	0.2	0	0	1	0	0.1	0	0	0.1
0	0	0	0.1	0	0	0.1	0.1	0	0.1	0.1	0	0	0.1	0	0.1	0
0	0.1	0	3.9	0.1	0	0	0	0.1	0.6	0.5	0	0	0.1	0	0	0
0.1	0	0.1	0.1	0	0	0	0	0.4	0.1	0.1	0	0	0	0	0.1	0.1
0	0	0	0	0	0	0	0.1	0	0	0	0.1	0	0	0	0.1	0
0.1	0	0	0	0	0	0	0	0	0	0	0	0	0	0	0	0
0.1	0	0	0	0	0	0	0	0	0.1	0.1	0	0	0	0	0	0
0.1	0	0	0	0	0	0	0	0	0	0	0	0	0	0	0	0
0	0	0	0	0	0	0	0	0	0	0	0	0	0	0	0	0
0.1	0	0	0	0	0.1	0	0	0	0	0	0	0	0	0	0	0
0.1	0	0	0	0	0	0	0	0	0	0	0.1	0	0	0	0	0
0.1	0.1	0	0.1	0	0	0	0	0	0.1	0.1	0.1	0	0	0	0.1	0
0.1	0.1	0.1	0	0.1	0.1	0	0	0.4	0	0	0	0	0.1	0	0	0
0	0	0.1	0	0	0.1	0	1.3	0	0	0	1.3	0	0	0.1	0	0.1
0	0.1	0.1	0	0	0.1	0	0.62	0.1	0	0	0.1	0	0	0.1	0	0.3
0.1	0	0	0.1	0	0	0	6.6	0	0.1	0.1	0.1	0	0	0	0	1.1
0.6	0	0	0.1	0	0	0	0	0	0.1	0.1	0	0	0	0	0.1	0
0.1	0.1	0	0.1	0.1	0	0	0.1	0	0.4	0.35	0	0.1	0.1	0	0.1	0
0.1	0.1	0.1	0.1	0.1	0.1	0	0	2.3	0.1	0.1	0.1	0	0.1	0	0.3	0
0.1	0.1	1.5	0	0.1	0.5	0	0.2	0.5	0.1	0.1	0.2	0	0.1	0.1	0.1	0.1
0.1	0	0.3	0	0	0.1	0	7	0.4	0	0	0	0	0.1	0.1	0.1	0.1
0.1	0	0.1	0	0	0.1	0	5	0	0	0	0	0	0	0.1	0	2.9
0.1	0	0	0	0	0	0	11.5	0	0	0	0.9	0	0	0.1	0	1.5
0	0	0.1	0	0	0	0	10.3	0	0	0	4.2	0	0	2.3	0	3.2
0	0	0	0	0	0	0	22.58	0	0	0	19.1	0	0	5.8	0	0.1
0	0	0	0	0	0	0	10.9	0	0	0	2.1	0	0	0	0	0
0	0	0	0	0	0	0	2.21	0	0	0	0	0	0	0	0	0
0.1	0	0	0	0	0	0	0.1	0	0	0	0.1	0	0	0	0	0
0.1	0.1	0	0.1	0	0	0	0	0.1	0.1	0.1	0.1	0	0.1	0.1	0	0
0.1	0.1	0.1	0	0	0.1	0	0	0.1	0.1	0.1	1.1	0	0.1	0.1	0.1	0.1
0.1	0.1	0.1	1.5	0.1	0	0	0	0.1	2.6	2.1	0.3	0.1	0	0.1	0.1	0.1
0.1	0.5	0.1	9.3	0.1	0.1	0.1	2.1	0.1	0.5	0.4	0.1	0.1	0.1	0	0.1	2.3
0	0.1	2.3	14.27	0	0.1	0	0.3	0.5	18.43	20.75	0.1	0	0.1	1.5	0	0.1
0.1	0.1	0	0	0	0	0	9.7	0	0.5	0.4	0.1	0	0	0.1	0	0
0.1	0.1	0	0	0	0	0	0.1	0	0	0	0	0	0	0	0	0
0.1	0	0	0	0	0	0	0.1	0	0	0	0	0	0	0	0.1	0
0.1	0	0	0	0	0	0	0	0	0	0	0	0	0	0	0.1	0
0.1	0	0	0	0	0	0	0	0	0.1	0.1	0	0	0	0	0.1	0
0.1	0.1	0	0.1	0	0	0	0	0	0.1	0.1	0.1	0.1	0	0	0.1	0
0.1	0.1	0.5	0.1	0.1	0.1	0	0	1.4	0.1	0.1	0.1	0	0.1	0	0	0
0.1	0.1	1.62	0	0.1	0.3	0	12.6	2.1	0	0	1.4	0	0.1	0.1	0	0.1
0.1	0	0.1	0	0	0.1	0	16.4	0	0	0	5.2	0	0.1	0.1	0	0.1
0.6	0	0	0	0	0	0	1	0	0	0	3.78	0	0.1	0.1	0.1	0.3
0.1	0	0	0	0	0	0	0	0	0	0	0.6	0	0	0	0.1	0
0.1	0	0	0	0	0	0	0	0	0	0	0	0	0	0	0.1	0
0.1	0	0	0	0	0	0	0	0	0	0	0.1	0	0.1	0	0.1	0
0	0	0	0	0	0	0	0	0	0	0	0.1	0	0	0	0	0
0.1	0.1	0	0	0.1	0	0	0.1	0	0	0	2.1	0	0.1	0	0	0.1
0.1	0.1	0.8	0	0.2	0	0	0.1	0.1	0	0	22.82	0	1.3	17.47	0.1	0.5
0.1	0.1	0.7	0	0.1	0.5	0	14	0.2	0	0	2.4	0.1	7.79	8.9	0.1	1.2
0.6	0	0.1	0	0	0.2	0	16.96	0	0	0	12.9	1.3	7.4	2.5	7.2	6.2
1.1	0	0	0	0	0.1	0	8.3	0	0	0	25.34	0	0.1	2.8	0.1	0.1
0.1	0	0	0	0	0	0	9.4	0	0	0	10.34	0	0.1	0.3	0.1	0.7
0.1	0.1	0	0.1	0.1	0	0	3.9	0	0	0	0.1	0.1	0.1	0	0.1	0.1
0.3	0.1	0	0.1	0.1	0	0	0	0.1	0.1	0.1	0.1	0	0.1	0	0.1	0.1
0.8	0.1	0	0	0	0	0	0	0.1	0.1	0.1	10.2	0	0.1	0.1	0	0.1
1.3	0.1	0.1	0	0.1	0	0	0	0	0	0	5.2	0.1	0.1	0	0.1	0.5
2.3	0.1	0	0	0.1	0	0	0	0	0	0	0.1	0	0.1	0	0.1	0.1
0.4	0.1	0	0	0.1	0.1	0	0.1	0	0.1	0.1	0.5	0	0.1	0	0.1	0
0.2	0.1	0.1	0.1	0	0.1	0.1	0	0.1	0.1	0.1	23	0	0.1	0.1	0	0.1
0.1	0.1	0	0	0	0.1	0.1	6.2	0	0	0	28.46	0	0.1	0	0	0.1
0.1	0	0	0.1	0	0.1	0.1	1.9	0	0.1	0.1	12.8	0	0	0	0	0.2
0.1	0	0	0.1	0	0.1	0.1	0.1	0.1	0.2	0.1	26.23	0	0.1	0.1	0.1	0.1
1.1	0	0	0.1	0	0.1	0.1	0.1	0	0.1	0.1	79.19	0	0.1	0.1	0.1	1.4
0.5	0	0	0	0	0	0.9	0	0	0	0	0.3	0	0.4	0	0.1	0.1
0.4	0.1	0	0.1	0.1	0.1	15.85	0.1	0	0.1	0.1	6	0.1	0.8	0	0.1	0
1.4	0.8	0	0.1	8.3	0.1	16.7	5.7	0	0.1	0.1	32.73	0.1	4.21	0.75	0.1	0.1
2.2	3.78	1.6	0.1	6.1	1.93	0.7	28.32	0.1	0.1	0.1	24.92	0.1	4.7	0.2	0.1	21.12
4.3	0.1	0.1	0	3.3	3.8	0.1	5.6	0	0.3	0.2	0.1	4.8	54.25	0.6	0.1	25.49
4.81	0.1	0	0	0.1	5.1	0	3	0	0	0	0.5	3.52	86.93	0.1	0.1	0.6
4.1	0.1	1.1	0	2.7	91.75	0.1	1.1	10.8	0	0	2.5	0.6	36.94	0.1	0.1	3.5
3.2	0.1	1.4	0	16.99	19.71	0.1	0.6	10	0	0	0.1	0.1	4.4	0.2	0.1	4.7
1.7	33.5	1.9	3.4	27.11	2.1	0.1	2.9	2.2	0.1	0.1	1.9	0.1	0.1	0.1	0.1	0.4
0.1	37.6	0.1	55.09	0.1	2.3	0.1	3.1	5.2	12.3	13.35	7.6	0.1	0.1	0.1	0.1	2.5
0.4	0.6	0.1	4.4	0.1	1.3	10.4	9.3	0.7	18.49	20.9	36.71	0.1	0.1	25.64	0.1	7.58
3.49	0.1	2.6	0	0	0.6	0.1	11.6	0	0	0	53.31	0.1	0.1	72.87	0.1	10.26
1.5	0.1	0.1	0	0	0.1	0.1	0.1	0	0	0	13.2	0.1	0.1	43.44	0.1	15.01
2.7	0	0.1	0	0	0.1	0.1	77.56	0	0	0	8.37	0.1	0.1	2.3	0.1	18.6
2.3	0	0	0	0	0.1	0.1	77.53	0	0	0	26.06	0.1	0.1	0.1	0.1	0.1
0.6	0	0	0.1	0	0.1	0.1	6.2	0	0.1	0.1	29.79	0.1	0.1	0	0.1	0
0.1	0.1	0	0	0	0.1	0.1	0.1	0	0.1	0.1	8.11	0	0.1	0	0.1	0.1
0.1	0	0	0	0.1	0	0.1	0	0	0	0	9	0.1	7.07	0	0.1	0
0.7	0	0	0	0.1	0	0	0	0	0	0	0.3	1	5.5	0	2.5	0
0.3	0	0	0	0.1	0.1	0.1	0	0	0	0	0.1	0.1	2.5	0	1.9	0
0.1	0.1	0	0	0.1	0	0	0.1	0	0	0	2.9	0.1	0.1	0	0.1	0
0.1	0.1	0	0.3	0.1	0.1	0.1	0.1	0	0	0	2.6	0.1	0.1	0	0.1	0
0.1	0.1	0	0.1	0.1	0.1	0.1	0	0	0	0	0.1	0.8	4.6	0.1	0.1	0
0.1	0	0	0.1	0	0.1	0.1	0.1	0	0	0	0.1	0	3.6	0.1	0.5	0.1
0.2	0	0	0	0	0.1	0.1	6.3	0	0	0	1.4	0	0.7	0.1	0.1	0
0.1	0	0	0	0	0.1	0.1	0	0	0	0	3.7	0	0.1	0	0.1	0.1
0.1	0	0	0	0	0	0.1	0	0	0	0	13.14	0	0.1	0	0.1	0.1
0.1	0	0	0.1	0	0.1	0.1	0	0	0	0	5	0	0.1	0	0.1	0.1
0.8	0	0	0	0	0.1	0.1	0	0	0.1	0.1	6.7	0	19.94	0.1	0.1	0
1.3	0	0	0	0	0.1	0.1	0.8	0	0	0	7.9	0	1.7	0.1	1.4	0.1
0.1	0	0	0	0	0	0.1	0	0	0	0	16.4	0.1	10.29	0.1	0.1	0.1
1.3	0	0	0	0	0	0.1	0	0	0	0	1.6	1.1	0.1	0	0.1	0
0.5	0	0	0	0	0.1	0.1	0	0	0	0	17.18	0.1	0.1	0	0.1	0
2.4	0	0	0	0	0	0.1	0.1	0	0	0	52.31	0	2.6	0.1	2.6	0.3
9.97	0	0.1	0	0	0	0.1	5.5	0	0	0	144.39	0.1	0.1	43.26	0.1	0.5
4.1	0	1.1	0	0	0.1	0.1	0.1	0	0	0	57.06	0.1	9.37	31.93	14	0.3
3.1	0	2.22	0	0	0	0.7	0.2	0	0	0	0.1	0.1	6.4	0.2	0.1	18.27
1.7	0.1	0.4	0	0	0.1	0.1	61.69	0	0	0	2.3	0.1	0.1	0.1	0.1	17.84
2.9	0	10.2	0	0	3.9	0.1	85.02	0	0	0	19.81	0.1	0.1	1	0.1	108.24
3.3	0	13.31	0	0	0.1	0.1	65.61	0	0	0	11.65	0.1	0.1	13.8	0.1	92.8
1.3	0	1.2	0	0	0.1	0.1	43.71	0	0	0	7.9	0.1	0.1	19.72	0.1	37.38
0.1	0	13.7	0	0	0.1	0.1	17.7	0	0	0	15.5	0.1	0	2.3	0.1	43.85
0.1	0	0.4	0	0	0.1	1.6	27.44	0	0	0	4.9	0.1	0.1	3	0.1	41.78
1	0	13.1	0	0	2.8	8.64	21.75	0.1	0	0	7.1	0.1	0.1	13.76	0.1	46.68
2.4	0	4.1	0	0	21.3	7.4	7.7	2.2	0	0	0.5	0.1	0.1	0.1	0.1	16.8
4.3	0.1	0	0.1	4.6	57.74	4	7.58	0.7	0.1	0.1	0.1	1.69	6.3	2.54	0.1	19.29
4.4	0.1	0.1	0.1	43.13	28.1	7.4	14.98	0.1	0.1	0.1	10.4	10.88	33.56	5.8	5.6	13.12
4.9	5.2	0.1	0	78.69	20.01	5.29	2.2	0.5	0	0	6.1	18	2.6	3.7	0.5	1.4
9.1	1.7	5.1	0	9.3	21.08	5.9	10.6	0.1	0	0	2	4.9	14.4	6.6	0.1	12.37
6.28	0.1	0.4	0.1	3.3	41.88	3.8	9.7	17.79	0	0	0.1	0.4	0.1	0.1	1.6	24.53
10.95	1.3	0.1	0.1	30.62	26.43	6.3	3.2	0.1	0.1	0.1	0.1	8.99	0.9	0.3	6.1	0.5
16.59	0.1	0.1	1.7	25.42	6.7	34.9	19.73	0	6.48	6.07	0.1	32.63	0.5	0.5	3.2	20.86
5.2	25.28	0.1	24.43	14.54	19.19	53.45	44.61	0.1	5.7	5.6	0.6	9.5	0.1	0.3	6.5	22.7
1	40.71	0.1	7.35	13	57.9	55.28	50.64	0.1	0.4	0.3	4.4	16.38	1.2	1.9	0.2	35.34
0.7	2.2	2.1	4.3	8.5	61.47	49.58	43.31	21.6	4.6	4.2	1.9	21.96	7.1	8.36	1.9	2.93
2.4	6.8	0.1	83.65	19.4	31.8	45.79	16.39	15.41	46.8	52.97	4.8	23.31	0.7	5.5	1.3	8.6
1.2	11.38	3	0.5	10.15	3.44	106.72	10.6	14.6	0.1	0.1	0.4	19.06	0.1	1.7	0.2	9.1
0.9	0.4	5.7	0.1	0.1	0.4	58.64	9.72	1.7	0.1	0.1	0.1	2.3	0.3	1	3.8	6
2.9	0.4	9.03	14.51	2	7	9.6	1.5	6.2	16.2	18.81	0.4	2	7.5	0.1	1.6	2
8.1	0.1	0.1	3.2	8.86	12.57	2.85	3.8	2.3	14.4	16.37	0	9.9	1.3	0.1	1.4	10.4
3.5	0.5	0.5	0.1	3.4	5.7	28.55	0.1	5.1	0.1	0.1	0.1	5.1	0.9	0.1	2.4	2.6
0.5	0.9	0	0.1	0.1	1.1	8.8	0.9	0.22	0.1	0.1	0	5.6	11.2	0	24.8	1
0.9	0.3	0.1	0.1	0.1	9.78	0.1	0.9	1.8	2.5	2	0.1	10.44	19.01	0.1	24.63	1.7
2.7	6.7	0	36.97	12.51	1.3	10.32	13.5	0	40.61	46.83	0.1	8.25	53.64	0.1	48.18	13.8
3.3	2.23	0.1	0.1	21.02	54.4	34.71	2.4	0.1	0.1	0.1	0.4	16.3	21.14	0.2	35.21	5.6
0.2	0.1	0	0.1	28.03	24.64	14.16	1.7	0.1	1.7	1.3	0.1	27.83	29.57	0.1	3.2	10.7
0.9	0.1	0	0.1	15.47	6.63	8.11	6.5	0.5	0.1	0.1	0.8	30.58	35.23	0.1	1.9	11.3
6.9	0.1	0.7	0	0.1	15.2	2.3	6.49	11.83	0.1	0.1	0.6	16.88	20.58	2	13.72	13.18
1.1	2.5	9.4	0.1	29.94	14.36	12.36	7.05	11.3	0.1	0.1	2.4	16.1	13.08	6.1	1.4	4.9
10.7	0.1	0.1	0.6	2.11	23.62	16.7	5.7	0.1	0.1	0.1	6.6	6.45	3.6	2.3	1.1	13.9
0.7	0.1	0.3	0	0.1	13.6	1	5.9	0.1	0.5	0.4	7.7	4	0.1	12.66	0.66	3.03
0.1	0.2	1.4	3.5	0.4	10.27	0.1	8.6	0.2	0.2	0.1	14.6	0.7	0.1	2.5	0.1	5.2
0.8	0.1	62.11	0.1	2.2	16.72	0.1	1.9	8.37	0	0	13.05	0.1	0.1	18.58	0.1	11.19
0.5	0	22.68	0.8	0.1	21.81	0.1	6.4	13.04	0.1	0.1	19.7	0.1	0.1	25.13	0.1	9.1
4	0	48.2	0	0.1	3.1	0.1	10.84	8.4	0	0	25.13	0.1	0.1	27.61	0.1	8.7
1.39	0	32.39	0.1	0.1	7.7	0.1	2.8	0.6	3.3	2.91	31.1	0.1	0.1	33.71	0.2	1.1
0.9	0	58.39	0.1	0.1	5.5	0.1	3.8	4.25	0.1	0.1	13.9	0.1	0.1	12.45	1.1	13.57
1.8	0.1	21.03	0	0.1	0.5	0.1	6.2	4.9	0	0	39.41	0.1	0.1	30.4	0.1	18.27
0.1	0	79.47	0	0.47	0.6	0.1	0.1	7.3	0	0	71.46	0.1	0.2	52	0.1	8.9
0.2	0	3.6	0	0	0.3	0.1	0.1	0.1	0.1	0.1	55.34	0.1	0.8	77.02	0.1	0.6
0.6	0	0.1	0	0.1	0.1	0.1	0.6	0	0.1	0.1	85.39	0.1	1.8	38.22	0.1	2
8.47	0	0.1	0	0	0.1	0.1	0.1	0	0.1	0.1	47.04	0.1	0.6	4.2	0.1	0.1
6.98	0	0.8	0	0	0.1	0.1	2.1	0.1	0.1	0.1	21.4	0.1	0.9	1.1	0.1	4.7
4.9	0	0.1	0	0	0.1	0.1	0.1	0	0	0	54.02	0.1	0.1	30.53	1.7	0.6
8.4	0	15.4	0	0	0	0.1	0.1	0	0	0	73.38	0.1	0.1	93.44	0.1	0.1
5.9	0	60.15	0.1	0	0.1	0.1	0.5	0.1	0	0	66.75	0.1	0.1	89.12	0.1	0.7
2.1	0	36.24	0	0.1	0.8	0.1	0.6	0.1	0.1	0.1	62.41	0.1	0.1	70.52	0.1	13.82
1.3	0	39.81	0	0.1	0.2	0.2	0.9	0.1	0	0	3.85	0.1	8.1	12.5	0.9	13.6
17.82	0	49.5	0	0.1	3	0.4	0.1	16.12	0.1	0.1	4	0.1	1	0.1	0.1	1.7
15.82	0.1	28.52	0.1	0.1	8.4	0.1	0.1	31.38	1.5	1.1	6.86	0.1	0.1	0.3	0.1	0.1
5.8	0.8	4	0.1	0.1	10.4	0.1	0	9.48	0.1	0.1	14	0.1	0.1	4	0.1	0.6
2.56	0.1	26.71	0	2.3	9.7	0.1	0	11.12	0.83	0.6	6.27	0.1	35.85	14.89	0.1	0.8
2	0.1	16.91	0	4.71	9.4	0.1	0.1	27.35	0.1	0.1	3.2	0.5	10.6	0.1	0.11	0.1
1.9	0.2	12.6	0.1	18.3	1	0.1	0.1	21.6	0.1	0.1	1.5	0.7	12.88	1.9	0.3	0
5.6	2.06	1.5	0.1	0.5	0.1	0.1	0	16.2	0.1	0.1	0.9	23.57	31.05	3.34	4.9	0
15.24	1.8	0.2	0.1	6.4	0.1	0.1	0	8.66	0.1	0.1	0.1	1.8	3.4	4.4	2.7	0
22.29	5.7	0.1	0	2.28	1.1	0.1	0.1	8.79	0.1	0.1	0.1	0.2	73.34	0.1	0.1	0
7.24	7.7	0	0.1	1.18	0.1	0.1	0.1	0.7	0.1	0.1	0.7	0.1	45.8	2.2	2.6	0.1
12	0.8	0.6	0	0.1	1.4	0.1	0.1	1.9	0.1	0.1	0.1	1.6	1	0.1	5.4	0.1
11.21	3.2	0	0	5.83	9	0.1	2.6	0.1	0	0	0.1	0.1	0.1	0	5.7	1.65
20.99	1.8	0	0.1	5.01	4	0.1	3.6	0	0.1	0.1	0.1	0.4	0.1	0	3.8	6.8
2.3	0.8	0	0.8	4.9	6.6	0.1	0.1	0	0	0	0.1	0.1	27.24	0	3.5	3.8
3.2	0	0	0	15	36.25	0.1	0.5	0	0.1	0.1	0.1	16.1	19.47	0.1	0.1	3.8
2.8	0.1	0	0.9	42.39	25.68	0.1	1.8	0.1	0.1	0.1	0.9	17.83	11.03	1.3	0.3	4.7
2.1	0.1	0.1	0	58.25	24.29	0.1	4.8	0.1	0.6	0.43	0.1	10.8	6.8	0.1	9.52	12.9
5.7	0.1	0.1	0	41.29	39	0.1	1.3	0.1	0.3	0.3	3.5	7.1	0.1	0.1	7.09	6.8
3.1	1.5	0	0	115.99	21.39	0.1	6.1	0.1	0	0	0.5	12.24	0.5	0.1	16.69	0.1
0.2	0.1	0	0	83.51	7.6	11.26	0.8	0	0.1	0.1	0.1	22.49	2.2	0	6.49	0.1
0.4	0.1	0	0	19.2	2.07	6.7	8.3	0	0	0	0.1	26.4	0.1	0.1	12.23	22.38
1	0.1	2.7	0	13.5	13.1	36.07	20.96	0.1	0.1	0.1	4.3	18.84	0.2	14.11	4	44.84
2.2	0.8	50.54	0.1	7	18.33	36.1	9.8	4.5	0	0	11.1	3.4	0.1	24.01	0.1	26.68
2.2	5.3	67.66	0.1	0.1	10.1	0.1	15.1	4	0	0	10.1	0.6	0.1	40.1	0.1	9.9
1.4	0.1	60.1	0	1.41	22.38	0.1	3.5	0.3	0	0	14.9	0.1	0.1	34.12	0.1	0.1
0.1	0.1	36.19	0	0.1	47.94	0.1	0.1	29.25	0	0	2.2	0.1	5.2	7.3	0.1	1.7
0.1	0.1	10.91	0	0.1	33.42	0.1	0.1	62.71	0	0	0.1	0.1	18.71	8.2	0.1	0.6
0.1	1.7	0.4	0	9.81	16.84	0.1	0.1	34.49	0	0	0.1	0.1	16.39	4.4	0.1	0.1
0.1	14.4	3.4	0	87.52	4.4	0.1	0.1	0.1	0	0	0.1	0.1	40.37	0.1	0.1	0.2
0.1	27.61	0.1	0	28.89	0.2	0.1	0.1	2.3	0.1	0.1	0.1	0.1	2.8	0	0.1	0.1
0.1	16.7	0.8	0.1	2.7	0.1	0.1	0.1	1.5	0.7	0.5	1	0.1	0.1	0	0.1	0.1
0.1	3	0	0.1	0.6	0.1	0.1	0.1	6.9	0	0	0.1	0.1	0.1	0.1	0.1	0.2
0.1	0	4.17	0	0.5	0.5	0.1	0.1	7.4	0	0	0.1	0.1	0.1	0.1	0.1	1.2
0.1	0	3.2	0.1	0.1	0.1	0	0.1	0.1	0.1	0.1	1.1	0.1	0.4	0.1	0.1	1.8
1.1	0.1	0	0	0	0.1	0	0.1	0	0	0	1.03	0.1	3.7	0.1	0.1	0.9
12.73	0	0	0	0	0.1	0	0	0	0	0	0.1	0	0.1	1	3.6	0.1
4.5	0	0.1	0	0	0	0	0.1	0	0	0	0	0	0	0	0.1	0
0.1	0	0	0	0	0.1	0	6.1	0	0	0	0.1	0	0	0.1	0.1	5.3
0.1	0	4.5	0	0	6.3	0.1	0.8	0.1	0	0	0.9	0	0	5.8	0.1	13.63
0.1	0.1	6.87	0	0.1	24.15	0	0.1	0.1	0	0	0.1	0.1	0.1	0.1	0.1	0.3
0.1	0.1	3.3	0	2.6	18.1	0.1	0.1	1	0	0	0	0.1	0.1	0	0.1	0.5
0.1	0.1	0.1	0.1	15.7	10.31	0.1	0.1	0.6	0	0	0.1	0.1	0.2	0.1	0.1	0.1
0.1	0	0.8	0	3.09	0.1	0	0.1	1.8	0	0	0.6	0.1	1.6	0.1	0.1	0
0.2	0	2	0	0	0.1	0.1	0	0.2	0	0	0.1	0	1.9	0.1	0.1	0.1
0.1	0	0.1	0	0	0.1	0.1	0.1	0	0	0	0.9	0	6.2	0.3	0.1	8.6
0.1	0	0	0	0	0.1	0	7.1	0	0	0	0.1	0	1.2	0	0.1	15.64
0.1	0	0	0	0	0.7	0	20.8	0	0	0	0.1	0	0.1	0	0.1	4.85
0.1	0	0	0	0	0.1	0	9.79	0	0	0	0	0	5.9	0	0.1	1.2
0.1	0.1	0	0	0	0	0	12.4	0	0	0	0	0	1.5	0	0.1	2.7
0.1	0.1	0	0	0	0.1	0.1	10.4	0	0	0	0	0	0.1	0	0.1	2.9
0.1	0.1	0	0	0	0.1	0.1	7.3	0	0	0	0.9	0	2	0	0.1	2.36
0.1	0.1	0.1	0	0.6	0.1	0	24.21	0.1	0	0	0.1	0.1	0.1	0.6	0.1	9.8
0.1	0	0	0	0.1	0.5	0	1.4	0	0	0	0.3	14.01	0.1	0.1	0.1	13.13
0.1	0.1	0	0	0.1	2.6	0	0.1	0	0	0	0.1	7.97	26.96	0.1	3.99	5.6
0.1	0.1	0	0.1	0.1	7	0.1	0.1	0.1	0.7	0.5	0.1	6.9	28.71	0.1	1.1	1.3
0.1	0.1	2.4	0	0.1	14.8	0.1	0.1	1.9	0.1	0.1	0.1	2.95	4	0.1	0.1	0.5
0.1	0.1	0.7	0.1	0.3	4.4	0.1	4.7	0.1	0.1	0.1	0.1	1.6	2.4	0.1	0.1	0.3
0.1	0.1	0	0	0.2	0.1	0	7.3	0.1	0	0	2	0.2	0.1	6.5	0.1	8.19
2.2	0.1	0	0	0	0.1	0	4	0	0	0	1.44	0.2	0.1	0.1	0.1	3.2
2.3	0.1	0	0	0.1	0	0	1.7	0	0	0	0.1	0.1	0.1	0.1	0.1	0.2
1.4	0.1	0	0	0	0	0.1	2.4	0	0	0	0	0.1	0.1	0.1	0.1	0.1
10.5	0	0	0	0	0	0	4.7	0	0	0	0.1	0.1	0.1	0.1	0.1	0.1
2.6	0	0	0	0	0	0	1.7	0	0	0	1.2	0.1	1.9	0	0.1	0
0.2	0	0	0	0	0	0	3.4	0	0	0	0.1	0.1	0.1	0	0.1	0
0.1	0	0	0	0	0	0	1.2	0	0	0	0.1	0	0.7	0	0.1	0
0.5	0	0	0	0	0	0	0.1	0	0	0	0	0.1	2.06	0	0.5	0
0.3	0	0	0	0	0	0	0	0	0	0	0	0.1	1.5	0	4.12	0
0.1	0	0	0	0	0	0	0	0	0	0	0	0.1	0.1	0	0.1	0
0.1	0	0	0	0	0	0	0	0	0	0	0	0	0.1	0	0.1	0
2.4	0	0	0	0	0	0	0	0	0	0	0	0	0	0	0	0
0.4	0	0	0	0	0	0	0	0	0	0	0	0	0	0	0	0
0.1	0	0	0	0	0	0	0	0	0	0	0	0	0	0	0	0
0	0	0	0	0	0	0	0	0	0	0	0	0	0	0	0	0
0	0	0	0	0	0	0	0	0	0	0	0	0	0	0	0	0
0	0	0	0	0	0	0	0	0	0	0	0	0	0	0	0	0
0	0	0	0	0	0	0	0	0	0	0	0	0	0	0	0	0
0	0	0	0	0	0	0	0	0	0	0	0	0	0	0	0	0
0	0	0	0	0	0	0	0	0	0	0	0	0	0	0	0	0
0	0	0	0	0	0	0	0.1	0	0	0	0	0	0	0	0	0.1
0	0	0	0	0	0	0	1.8	0	0	0	0	0	0	0	0	0.5
0.1	0	0	0	0	0	0	28.64	0	0	0	0.4	0	0	0	0	1.11
0.1	0	0	0	0	0	0	0.2	0	0	0	0.1	0	0	0.1	0	0.1
0.1	0	0	0	0	0	0	0.1	0	0	0	0	0	0	0.1	0	0
2.6	0	0	0	0	0	0	0.1	0	0	0	0.1	0	0	0	0	0
4.6	0	0	0	0	0	0	0.1	0	0	0	0.1	0	0.1	0	0.1	0
0.6	0	0	0	0	0.1	0	0.1	0	0	0	0.1	0.3	1.3	0	4.3	0
0.1	0	0	0	0.1	0.1	0.37	0	0	0	0	0.1	9.44	4.5	0	0.5	0.1
0.1	0.1	0	0	0	0.1	0.1	0	0	0	0	0.1	0.1	0.1	0	0.1	0
0.1	0	0	0	0	0	0	0.1	0	0	0	0.1	0.1	0.1	0	0.1	0.1
0	0	0	0	0	0	0	0	0	0	0	0	0.1	0.1	0	0.1	0
0	0	0	0	0	0	0	0.1	0	0	0	0	0.1	0.1	0	0.1	0
0	0	0	0	0	0	0	0.1	0	0	0	0	0.1	0.1	0	0.1	0
0	0	0	0	0	0	0	0	0	0	0	0	0	0.1	0	0.1	0
0.1	0	0	0	0	0	0.1	0	0	0	0	0	0.1	0.1	0	0.1	0
0	0	0	0	0	0	0.1	0	0	0	0	0	0.1	0	0	0.1	0
0	0	0	0	0	0	0	0	0	0	0	0	0	0	0	0	0
0	0	0	0	0	0	0	0	0	0	0	0	0	0	0	0	0
0	0.1	0	0	0	0	0.1	0	0	0	0	0	0	0	0	0	0
0	0.1	0	0	0	0	0	0	0	0	0	0	0	0	0	0	0
0	0	0	0	0	0	0	0	0	0	0	0	0	0	0	0.1	0
0	0	0	0	0	0	0	0	0	0	0	0	0	0	0	0	0
0	0	0	0	0	0	0	0	0	0	0	0	0	0	0	0	0
0	0	0	0	0	0	0	0	0	0	0	0	0	0	0	0	0
0	0	0	0	0	0	0	0	0	0	0	0	0	0	0	0	0
0	0.1	0	0	0	0	0	0	0	0	0	0	0	0	0	0	0
0	0.1	0	0.1	0	0	0	0	0	0	0	0	0	0	0	0	0
0	0	0	0	0	0	0	0	0	0	0	0	0	0	0	0	0
0	0	0	0	0	0	0	0	0	0	0	0	0	0	0	0	0
0	0	0	0	0	0	0	0	0	0	0	0	0	0	0	0	0
0	0	0	0	0	0	0	0.1	0	0	0	0.1	0	0	0	0	0.1
0	0	0	0	0	0	0	1.2	0	0	0	0.1	0	0	0	0	0.1
0	0	0	0	0	0	0	0.1	0	0	0	0.1	0	0	0	0	0
0	0	0	0	0	0	0	0	0	0	0	0.1	0	0	0	0	0
0	0	0	0	0	0	0	0	0	0.1	0.1	0	0	0	0	0	0
0	0	0	0	0	0	0	0	0	0.1	0.1	0	0	0	0	0	0
0	0	0	1.4	0	0	0	0	0	6.43	6.03	0	0	0	0	0	0
0	0.1	0	0.1	0.1	0	0	0	0.1	0.1	0.1	0	0	0	0	0	0
0	0	0.1	0	0	0	0	0	0.1	0	0	0	0	0	0	0	0
0	0	0	0	0	0.1	0	0	0	0	0	0	0	0	0	0	0
0	0	0.1	0	0	0	0	0	0	0	0	0	0	0	0	0	0
0	0	0	0	0	0	0	0.1	0	0	0	0	0	0	0	0	0
0	0	0	0	0	0	0	0	0	0.1	0.1	0	0	0	0	0	0
0	0	0	0	0	0	0	0	0	0	0	0	0	0	0	0	0
0	0	0	0	0	0	0	0	0	0.1	0.1	0	0	0	0	0	0
0	0	0	0	0	0	0	0	0	0	0	0	0	0	0	0	0
0	0	0	0	0	0	0	0	0	0	0	0	0	0	0	0	0
0	0	0	0	0	0	0	0	0	0	0	0	0	0	0	0	0
0	0	0	0	0.1	0	0	0	0	0.1	0.1	0	0.1	0	0	0	0
0	0	0	0	0	0	0	0	0	0	0	0	0	0	0	0	0
0	0	0	0.6	0	0	0	0	0	0.1	0.1	0	0	0	0	0	0
0	0.1	0	0.7	0	0	0	0	0.1	0	0	0	0	0	0	0	0
0	0.1	0.1	6.7	0	0	0	0	0	3.1	2.7	0	0	0	0	0	0
0	0.1	0.1	14	0	0	0.1	0	0	5.81	5.7	0	0	0	0	0	0
0	0	14.59	0	0.1	0.1	0	0	0.1	0.1	0.1	0.1	0.1	0.1	4.9	0	0.1
0	0	0.1	0	0	0.1	0	0.2	0	0	0	8.5	0	0.1	4.8	0	0.5
0	0	0	0	0	0.1	0	10.2	0	0	0	0	0	0.1	0	0	1.7
0	0.1	0	0.2	0.1	0.1	0	0	0	0.1	0.1	0	0.1	0	0	0	0
0	0.1	0	0.1	0.1	0	0	0	0	0.1	0.1	0	0	0	0	0	0
0	0.1	0	1.2	0.1	0.1	0	0	0.1	0.3	0.2	0	0	0.1	0	0	0
0	0.1	8.8	1	0.1	0.1	0.6	0	0.17	4.13	3.9	0	0.1	0	0.1	0	0
0.1	0	9.29	0	0	0.5	0	0.7	0.6	0.1	0.1	11.4	0.1	0.1	7.9	0.1	2.3
0.1	0	0	0	0	0	0	0.1	0	0	0	0	0	0	0	0	0
0.1	0	0	0	0	0	0	0	0	0	0	0	0	0	0	0	0
0.1	0	0	0	0	0	0	0	0	0	0	0	0.1	0.1	0	0.1	0
0	0	0	0	0	0	0	0	0	0	0	0	0.1	0.1	0	0.1	0
0.1	0	0	0	0	0	0	0	0	0	0	0	0.1	0.1	0	0.1	0
0	0	0	0	0	0	0	0	0	0	0	0	0	0.1	0	0.1	0
0.1	0	0	0	0	0	0	0	0	0	0	0	0.1	0	0	0.1	0
0	0	0	0	0	0	0	0	0	0	0	0	0.1	0.1	0	0.1	0
0	0	0	0	0	0	0	0	0	0	0	0	0.1	0.1	0	0.1	0
0	0	0	0	0	0	0	0	0	0	0	0	0.2	0.1	0	0	0
0.1	0	0	0	0	0	0	0	0	0	0	0	0.1	0	0	0.1	0
0.1	0	0	0	0	0	0	0	0	0	0	0	0.1	0	0	0.1	0
0.1	0	0	0	0	0	0	0	0	0	0	0	0.1	0	0	0.1	0
0	0	0	0	0	0	0	0	0	0	0	0	0	0	0	0.1	0
0	0	0	0.9	0	0	0	0	0	3	2.4	0	0	0	0	0.1	0
0	0	0	0.1	0	0	0	0	0	0.1	0.1	0	0	0	0	0	0
0	0	0	0	0	0	0	0	0	0	0	0	0	0	0	0	0
0	0	0	0	0	0	0	0	0	0	0	0	0	0	0	0	0
0	0	0	0	0	0	0	0	0	0	0	0	0	0	0	0	0
0	0	0	0	0	0	0	0	0	0	0	0	0	0	0	0	0
0	0	0	0	0	0	0	0	0	0	0	0	0	0	0	0	0
0	0	0	0	0	0	0	0	0	0	0	0	0	0	0	0	0
0	0	0	0.6	0	0	0	0	0.1	0.8	0.6	0	0	0	0	0	0
0	0.1	0.1	8.3	0	0	0	0	0.1	3.1	2.6	0	0	0	0	0	0
0	0	4.2	0	0	0	0	0	0.8	0.1	0.1	0.1	0	0	0.1	0	0
0	0	0	0	0	0	0	0	0	0	0	0.1	0	0	0.1	0	0.1
0	0	0	0	0	0	0	0	0	0	0	0	0	0	0	0	0
0	0	0	0	0	0	0	0	0	0	0	0	0	0.1	0	0.1	0
0	0	0	0	0.1	0.1	0	0	0	0.1	0.1	0	0.1	0.1	0	0.1	0
0.1	0	0	0	0	0	0	0	0	0	0	0	0.1	0.1	0	0.1	0
0	0	0	0	0	0	0	0	0	0	0	0	0.1	0.1	0	0.1	0
0	0	0	0	0	0	0	0	0	0	0	0	0.1	0.1	0	0.1	0
0.1	0	0	0	0	0	0	0	0	0	0	0	0	0.1	0	0.1	0
0.1	0	0	0	0	0	0	0	0	0	0	0	0	0.1	0	0.1	0
0	0	0	0	0	0	0	0	0	0.1	0.1	0	0	0.1	0	0	0
0.1	0	0	0	0	0	0	0	0	0	0	0	0.1	0	0	0	0
0	0	0	0	0	0	0	0	0	0	0	0	0	0	0	0	0
0	0	0	0	0	0	0	0	0	0	0	0	0	0	0	0	0
0	0	0	0	0	0	0	0	0	0.1	0.1	0	0	0	0	0	0
0	0	0	0	0	0	0	0	0	0	0	0	0	0	0	0	0
0	0	0	0	0	0	0	0	0	0	0	0	0	0	0	0	0
0	0	0	0	0	0	0	0	0	0	0	0	0	0	0	0	0
0	0	0	0.1	0	0	0	0	0	0.1	0.1	0	0	0	0	0	0
0	0	0	0	0	0	0	0	0	0	0	0	0	0	0	0	0
0	0	0	0	0	0	2.3	0	0	0	0	0	0	0	0	0	0
0	0.1	0	0.1	0	0	0.1	0	0	0.1	0.1	0	0.1	0	0	0	0
0.1	0.1	0	1.8	0.1	0	0	0	0	0.1	0.1	0	0.1	0.1	0	0	0
0	0.1	0	0	0.1	0.1	0	0.1	0.1	0	0	0	0.1	0	0	0.1	0.1
0	0.1	0	0	0	0	0	0	0	0	0	0	0.1	0.1	0	0.1	0
0	0	0	0	0	0	0	0	0	0	0	0	0	0	0	0.1	0
0	0	0	0	0	0	0	0	0	0	0	0	0	0	0	0	0
0	0	0	0	0	0	0	0	0	0	0	0	0	0	0	0	0
0	0	0	0	0	0	0	0	0	0	0	0	0	0	0	0	0
0	0	0	0	0	0	0	0	0	0	0	0	0	0	0	0	0
0	0	0	0	0	0	0	0	0	0	0	0	0	0	0	0	0
0	0	0	0	0	0	0	0	0	0	0	0	0	0	0	0	0
0	0.1	0	0.1	0	0	0	0	0	0.1	0.1	0	0	0	0	0	0
0	0.1	0	0.1	0.1	0.1	0	0	0.1	0.1	0.1	0	0	0	0	0	0
0	0.1	0	0.9	0	0	0	0	0.1	1.4	1	0	0	0	0	0	0
0	0.1	0.1	4.7	0	0.1	0	0	0.1	1.4	1	0	0	0	0.1	0	0.5
0.1	0.1	0	4.4	0.1	0.1	0	0.1	0.3	11.3	12.1	0.1	0.1	0	0.1	0.1	0.1
0.1	0.1	11.5	6	0.1	0.1	0	0	3.71	12.4	13.52	0	0.1	0.1	1.1	0.1	0.1
0.1	0.1	7.27	0.1	0	0.1	0	0	0.5	0.1	0.1	0	0	0.1	1.7	0.1	0.1
0	0.1	3.6	0.1	0	0.1	0	0.1	0.1	0	0	0.8	0	0.1	4.1	0	0.8
0.1	0.1	1.6	0	0	0.1	0	0.1	1.7	0.1	0.1	0.1	0	0.1	0.3	0	2.2
0.1	0.1	1.8	0	0	0	0	0.1	0.1	0	0	0.1	0	0.1	0	0	7.3
0.1	0.1	0	0	0.1	0.9	0	18.91	0	0	0	0.1	0	0	0.1	0	15.65
0	0	0	0	0.1	0.1	0	0.3	0	0	0	0.1	0	0.1	0	0	0.7
0	0	0	0	0	0	0	1.5	0	0	0	0.1	0	0	0	0	1.1
0.1	0	0	0	0	0	0	0.3	0	0	0	0.1	0	0	0	0.1	0
0	0.1	0	0.1	0	0	0	0	0	0.1	0.1	0.9	0	0.1	0	0.1	0
0	0.1	0	0	0	0	0	0	0.1	0.1	0.1	0	0	0.1	0	0.1	0
0	0.1	0	2	0	0	0	0	0.1	3.59	3.2	0	0	0	0	0.1	0
0	0.1	7.5	0.1	0.1	0.1	0	0	2.9	0	0	0.1	0.1	0	0.2	0.1	0.7
0	0	0	0	0.9	1.9	0	9.8	0	0	0	1.1	0.1	0.1	1.4	0	7.5
0.1	0	0	0	0	0	0	0.2	0	0	0	0	0	0.1	0	0.1	0
0.7	0.1	0	0.7	0.3	0	0	0	0.1	0.1	0.1	0	0.1	0.1	0	0.1	0
0.1	0.1	0.1	0.1	0	0.5	0	0	3.7	0.1	0.1	0	0	0.1	0.1	0	0.1
0.1	0	9.1	0	0.1	3.4	0	8.9	0.1	0	0	3.1	0.1	0.1	1.2	0	6.8
0.1	0.1	0	0	0.1	0.1	0	11.77	0	0.1	0.1	0.5	0	0.1	0	0.1	0
1.6	0	0	0.1	0	0.1	0	0.1	0	0.1	0.1	0	0	0.6	0	0.1	0
0.1	0.1	0	0	0.1	0.1	0	0	0.1	0	0	0	0	0.1	0	0.2	0
0.1	0.1	0.6	0.1	0	0.1	0	0	0.1	0.1	0.1	0	0	0.1	0.1	0.1	0.1
0.1	0.1	0	0.1	0.1	0.1	0	0.1	0.1	0	0	0.1	0.1	0.1	0	0.1	0.1
0.1	0.1	0.1	0	0.1	0.1	0	4.6	0	0	0	0	0.1	0.1	0	0.1	1
0.3	0.1	0	0	0.1	0.1	0	7	0.1	0	0	0.1	0.1	0.2	0	0.1	0.1
0.6	0.1	0	0.1	0.1	0.1	0	9.1	0.1	0.1	0.1	0.9	0	0.1	0	0.1	0.1
0.3	0.1	0	0.2	0.1	0.1	0	0.1	0	0.1	0.1	0.1	0	0.1	0	0.1	0.1
1.7	0.1	0	0	0.1	0.1	0	1.4	0	0	0	0.1	0.1	0.1	0	0.1	0.2
0.2	0	0	0	0	0	0	0.1	0	0.1	0.1	0	0.1	0.1	0	0.1	0
1.2	0	0	0.1	0.1	0	0	0	0	0.1	0.1	0	0.1	0.1	0	1.9	0
0.2	0.1	6.67	0.3	0.1	0.4	0	0	1.6	0.1	0.1	0	0.1	0.6	0.1	0.1	0
0.1	0	0	0	0	0	0	0	0	0	0	0.1	0	0.1	0.1	0.1	0.1
0.6	0	0	0.1	0	0	0	0	0	0.1	0.1	0	0	0.1	0	0.1	0
1	0	0	0	0	0	0	0	0	0	0	0	0	0.1	0	0.1	0
0.1	0	0	0.1	0	0	0.1	0	0	0.1	0.1	0	0	0.1	0	0.1	0
0.1	0.1	0	3.2	0.1	0	0	0	0	0.7	0.6	0	0.1	0.1	0	0.1	0
0.1	0.1	0.1	0.1	0.56	0	0	0	0.1	0.2	0.2	0	0.1	0	0	0.1	0
0.1	0	0	0	0	0	0	0	0	0	0	0.1	0	0	0.1	0.1	0
0.1	0	0	0.1	0	0	0	5.7	0	0.1	0.1	0	0	0.1	0	0.1	0.1
0.1	0	0	0	0	0	0	0	0	0.1	0.1	0	0	0	0	0	0
0.1	0	0	0	0	0	0	0	0	0.1	0.1	0	0	0	0	0	0
0.1	0	0	0	0	0	0	0	0.1	0	0	0	0	0	0	0	0
0.2	0	0.1	0	0	0	0	0.1	0	0	0	0.1	0	0.1	0	0	0.1
0.8	0	0	0	0	0	0	3.2	0	0	0	0.1	0	0	0	0	0
0.1	0	0	0.1	0	0	0	0.1	0	0.1	0.1	0	0	0	0	0	0
0.1	0	0.1	0.1	0	0	0	0	0.1	0.1	0.1	0	0	0	0	0	0
0.1	0	0.1	0	0	0	0	0.1	0	0	0	0.1	0	0	0.1	0.1	0.1
0.1	0.1	1	0	0	0	0	0.1	0.1	0	0	0.9	0	0.1	0.1	0	0.4
0.1	0	2	0	0.1	0.1	0	3.6	0.1	0	0	15.6	0	0.1	5	0.1	3.2
0.1	0	0.1	0	0	0	0	11	0	0	0	12.5	0	0.1	0.1	0.1	0.2
0.6	0	0	0	0	0	0	0.1	0	0	0	3.7	0	0	0	0.1	0
0.1	0	0	0	0	0	0	0	0	0	0	0	0.1	0	0	0.1	0
0.1	0.1	0	0.1	0.1	0	0.1	0	0	0.1	0.1	0	0.1	0.1	0	0.1	0
0.1	1.8	0	5.3	1	0.1	0.1	0	0.1	3.8	3.4	0.1	1.3	3.5	0	0.1	0
0.1	0.8	0.1	0	7.5	1.2	0.1	0	4.4	0.1	0.1	0.1	0.1	2.7	0	0.1	0
0.1	0	1.5	0	0.1	0.2	0.1	0	0.8	0	0	0.6	0.1	4.38	0.1	0.1	3.9
0.1	0.1	0	0	0.1	1.7	0	8.7	0.1	0	0	12.8	1.7	4.8	0	0.1	6.9
0.1	0	0	0	0	0	0	8.3	0	0	0	0.5	0.1	0.1	0	0.1	0.1
0.1	0.1	0	0	0.1	0	0	1.65	0	0	0	0.1	0.1	0.1	0	0.1	0
0.1	0.1	0	0	0.1	0.1	0	1.8	0	0	0	3.8	0.8	0.1	0	0.1	0.1
0.1	0	0.1	0	0	0.1	0	3.33	0	0	0	3	0.7	1	0.1	0.1	0.5
0.1	0	0	0	0	0	0	0.1	0	0	0	0.1	2.1	0.2	0	0.1	0
1.1	0	0	0.1	0.1	0	0	0.2	0	0.1	0.1	1	1.96	0.1	0	0.9	0
1.6	1.1	0	0.1	0.4	0	0	0.1	0	0.1	0.1	2.6	10.41	0.1	0	0.9	0
0.1	4.2	0	8.21	5.7	0	0	0.3	0.1	0.1	0.1	5.73	0.1	0.1	0.1	0.1	0
0	0.1	0	0	0.1	0.2	0	3.2	0.1	0	0	8.1	0.1	0.1	1.9	0.1	0.3
0.1	0.94	0	1.4	2.1	0.4	0	5.4	0	0.1	0.1	8.57	1.5	0.8	11.2	2.31	6.1
1.5	0.1	1.5	0	0.1	0.1	0	2.21	0.1	0	0	10.1	0.1	6.1	25.59	0.3	24.55
0.1	0	0.1	0	0	1.5	0	0.1	0.1	0	0	6.9	0.1	6.9	9.4	0.1	2.3
28.63	0.1	0.97	0.1	0.1	0.5	0	0.1	0	0.1	0.1	0.5	0.1	20.5	6.6	0.9	0.1
50.03	0.1	3.9	0.1	0.1	0.1	0	0	0.1	0	0	0.1	0.8	19.3	2.29	0.2	0.2
73.61	0.1	0	0	0	0.1	0	5.51	0.1	0	0	7.5	0	0.1	0.1	0.1	1.5
0.1	0	0	0	0	0	0	4	0	0	0	0.1	0	0.1	0	0.1	0.1
0.1	0	0	0	0	0	0	0.1	0	0	0	0	0	0	0	0.1	0.1
0.1	0.1	0	0	0	0	0.1	0	0	0.1	0.1	0	0	0	0	0.1	0.1
0.1	0.6	0	0	0.2	0.1	0.1	0.1	0.1	0	0	3.3	0.1	0	0	0.1	0.1
0.1	4.5	0.1	0.1	3.6	0.1	12.46	0	0.6	0.1	0.1	0.1	0.1	0.1	0.1	0.1	0.1
0.1	3.9	6.06	0	2.5	3.3	27.47	9.9	0.9	0	0	8.57	0.1	0.5	3.4	0.1	1.1
0.1	0.1	1.2	0	0.1	1.7	29.8	42.05	0.1	0	0	0.1	0.81	2	0.5	0.1	8.1
8.84	0	0	0	0.1	0	14.28	9.1	0	0	0	6.51	0.1	0.9	0	1	0.8
4.3	0.1	0	0.1	0	0.1	29.88	3.8	0	0	0	4.7	0.1	0.1	0	2.6	0
5	1.4	0	0.1	0.1	0.1	52.83	0.1	0	0.1	0.1	24.7	0.1	0.1	0	0.1	0.1
0.9	12.6	0	12.74	1.5	2.5	30.74	0.1	0.8	11.7	12.55	55.58	0.1	0.1	0	0.6	0.1
1	0.7	5	13.23	2.4	16.51	8.41	6.3	1.6	0.1	0.1	43.03	0.5	15.49	0.1	0.1	9.5
16.2	0.1	0.1	0.1	1.95	1.4	5.3	11.14	0	0.1	0.1	63.15	0.1	14.5	3	4.2	10.9
4.76	0.1	0	0.1	0.1	0.7	20.77	7	0	0	0	49.08	0.1	4.7	0.1	0.3	0.1
1.8	5.44	0.1	1.9	1	0.1	24.8	1.4	0	0	0	13.82	0	3.2	7.6	0.1	0
0.5	0.5	10	0	7.07	0.1	0.1	24.69	0	0	0	17.79	3.2	8.4	5.6	0.3	10.6
2.3	0.1	0.1	0.1	3.2	0.1	0.1	27.89	0	0.1	0.1	25.58	24.7	5	10.16	0.1	67.26
1.3	0.8	0.5	0.9	11.7	3	45.53	84.61	0.1	2.83	2.3	95.8	1	0.1	28.54	0.1	20.54
1.8	9.2	0	1.4	0.1	0.1	90.98	21.4	1.1	0.1	0.1	35.87	0.1	0.1	0.1	0.1	0.1
0.2	0.8	8.2	16.7	0.1	0	69.35	8.4	0.5	10.2	10.73	23.61	0.1	0	0.4	0.1	1.8
0.1	0.1	0	16.77	0.1	0	112.51	16.01	0.1	26.73	29.93	39.32	0.1	0	2.9	0.1	2.5
0.1	19.98	0	23.17	5.99	0.1	0.2	32.41	0	53.34	57	35.49	0.2	0.1	9.1	0.1	7.4
2.3	0.6	2.8	36.19	0.2	3.4	0.1	0.8	3.4	73.39	69.7	0.1	0.1	0.1	0.1	0.1	13.6
0.5	0	3	0	0.1	11.1	0.1	34.62	0.6	0.1	0.1	0.5	0.1	0	4.9	0.1	97.51
1.8	0	71.59	0	0	0.5	0.1	20.5	0.1	0	0	15.42	0.1	0.1	75.32	0.1	51.09
0.1	0.1	6.3	0	0	0.1	0.1	25.5	0	0.1	0.1	53.53	0	0.1	99.88	0.1	13.33
0.1	0	0	0.1	0	0.1	0.1	1.9	0	0	0	42.17	0	4.1	0	0.1	0.3
0.1	0	0	0	0	0	0.1	0.1	0	0	0	5	0	12.92	0	0.1	0.1
0.1	0.1	0	0	0	0.1	0.1	3	0	1.5	1.2	0.1	0.1	11.93	0.1	0.1	0.1
0.2	0.1	0.1	0.3	0	0.1	0.1	0.3	1.6	0	0	0.1	0	1.6	0	0.1	0.67
0.4	0.1	0.1	0	0	1.5	0.1	3	0.1	0	0	4.84	0	0.1	0	0.1	3.7
0.1	0.1	0	0	0	0.1	0.1	1.3	0	0	0	5.82	0	0.1	0	0.1	1
0.1	0.1	0	0	0	0.1	0.71	1.5	0	0	0	9.08	0	0.1	0	0.1	0.1
0.1	0	0	0	0	0.1	0.1	0.1	0	0	0	1.7	0	0	0	0.1	0
0.1	0.1	0	0	0	0.3	0.1	0.1	0	0	0	10.1	0	0	0	0.1	0.1
0.1	0.1	0	0.1	0	0.1	0.1	0.3	0	0	0	0.8	0	0.1	0.1	0.1	0.2
0.1	0	0.1	0	0	0.1	0.1	0.1	0.1	0	0	0.1	0	0.1	0.7	0.1	5.2
0.1	0	0	0	0	0.1	0.1	23.3	0	0	0	1.1	0	0	2.2	0.1	0.1
0.1	0.1	0	0.1	0	0.1	0.1	88.7	0	0	0	31.79	0	0	7.4	0.1	46.23
0.1	0	0	0	0	0	0.1	71.87	0	0	0	83.59	0	0	11.2	0.1	15.85
0.1	0.1	0	0	0	0	0.1	25.86	0	0	0	88.83	0	0	17.99	0.1	0.1
0.1	0.1	0	0	0	0	0.1	0.6	0	0	0	56.43	0.1	0	9.23	0.1	0.1
0.1	0.1	0	0	0	0	0.1	0.1	0	0	0	28.79	0.1	0.1	0.8	0.1	0
4.2	0	1.35	0	0.1	0.1	0.1	0.1	0	0	0	34.12	0	2.3	0.1	0.1	0.1
62.33	0	2	0	0.1	0.1	0.1	0.1	0	0	0	29.12	0	13.53	9.4	0.1	0.1
3	0.1	2	0	0.1	5.7	0.1	0.1	0.1	0	0	26.56	0.1	24.46	8.4	23.29	0.1
0.8	0.1	3.5	0	1	5.9	0.1	0.7	0.1	0	0	32.86	0.3	18.66	15.56	2.6	0.7
2.9	0.1	1.3	0.1	0.1	14.45	0.1	4.4	0.1	0	0	17.43	4.7	5	12.24	0.1	5.49
0.6	0.1	6.6	0	0.1	8.2	0.1	16.9	0.1	0	0	21.93	1.3	7.5	6.2	0.1	16.38
0.3	0	9.3	0	0	0.6	0.1	22.04	0.1	0	0	29.15	0.1	8.81	17.28	0.1	17.9
4.1	0.1	4.7	0	0	3.9	0.1	2.5	0.1	0.1	0.1	27.37	0.1	54.06	32.76	1.9	10.6
4.1	0	7.85	0.1	0	0.3	0.2	0.8	0.1	0	0	48.22	0.1	23.19	47.11	82.12	20.2
0.2	0	14.05	0	0	2.4	1.1	0.1	0	0.1	0.1	56.76	0.1	80.49	49.97	3.7	7.3
5.6	0	6.6	0	0	3.27	2	0.1	0	0.8	0.6	21.77	0.1	2.6	44.19	1.1	33.66
2.1	0.1	5.2	0.3	0.1	3.8	1.1	0.1	0	0.1	0.1	0.4	0.1	0.3	3.7	0.4	4.6
3.3	0.8	0	0.1	12.91	0.1	1.1	0.1	0.1	0.3	0.3	0	0.6	6.9	0	0.1	0.4
13.28	0.1	0	0	4.7	0.1	3	0.1	0	0.1	0.1	0.1	8.1	25.34	0.1	30.4	2.2
5	2	0	0.1	10.3	0.1	0.1	0.33	0	0.1	0.1	0.1	6.4	55.12	0.1	4.7	2.2
17.11	7.81	0	0.1	14	4.8	0.1	0.1	0	0.1	0.1	8.79	12.7	24.75	0.1	2.5	5
1.9	0.1	0.1	0.1	21.7	54.39	0.1	1.11	0.1	0.1	0.1	4.51	10.35	4	0.1	3.5	4.3
2.5	0.9	0.1	0	124.25	12.42	0.1	1.3	0.9	4.7	4.28	0.5	9.26	11.86	0.1	0.6	5.4
11.02	54.14	0.1	0.1	133.67	1.95	1	7.2	3.2	3.5	3.1	3.61	8.32	0.1	0.1	2.1	18.4
8.8	46.72	9.63	1.9	13.22	0.5	4.3	5.1	4.2	0.1	0.1	0.1	21.88	0.1	0.1	1.7	18.91
8.7	35.63	6.5	0.1	16.76	4.2	2.2	7.4	11.08	0.1	0.1	0.4	6.48	0.1	2.4	0.9	8.9
15.71	59.17	3.4	10.29	28.24	1.58	6.6	37.09	0.5	10.2	10.88	0.3	3.32	0.1	0.1	1.8	18.6
29.5	17.8	0.1	0	27.56	11.8	8.2	44.25	0.6	0.1	0.1	2	12.52	0.1	0.1	8.13	37.63
9.92	0.1	0.1	0.1	7.4	37.66	87.32	28.9	1.5	0.2	0.2	11.8	1.6	0.1	4.2	16.62	20.1
4.4	6.78	0.4	12.9	27.74	10.7	11.3	15.4	5.4	1.1	0.84	3.5	1.9	0.3	12.33	17.93	8.3
1.4	21.87	13.47	0	3.7	6	12.12	25.87	12.8	1.8	1.4	3.1	12.18	0.1	17.76	32.31	14.3
0.9	17.4	32.29	13.86	12.69	19.05	23.27	34.09	17.94	1.9	1.4	0.9	9.86	0.8	0.1	9.99	18.89
0.4	33.67	0.1	1.2	14.11	9.3	13.11	62.63	9.8	8.5	8.3	0.1	11.22	3.78	2.9	21.32	43.21
0.6	18.43	10.61	0.1	11.41	7.6	9.9	92.02	6.1	0.5	0.4	0.1	24.01	4.4	2.3	14.3	22.82
0.1	6.22	24.15	2.1	7.46	10.7	14.6	70.77	7.1	14.95	17.07	15.54	16.01	0.1	3.05	5.5	6.3
1.6	0.1	11.73	3.1	1.8	0.7	3.7	73.75	2.2	2.7	2.2	11.51	7.97	0.1	5.58	11.39	13.9
5	0.1	11.9	5.56	2.7	0.7	1.3	77.76	4.74	17.76	20.04	0.1	1.7	0.7	0.9	7.48	33.12
5.5	0.1	0.5	4.7	11.69	16.11	1	37.77	9.14	2.8	2.3	3.5	9.6	7.17	1.3	16.9	36.92
4.4	4.1	0.1	0.1	48.77	11.4	9.09	18.14	0.3	0	0	0.1	35.35	3.67	0.6	20.11	4.74
3.3	16.7	0.1	0.2	16.69	11.02	14.2	27.37	0.1	2.3	1.8	0.1	32.4	7.6	0.1	0.1	6.22
0.9	0.94	0	4.4	1.21	2.7	5.7	7.8	0	0.1	0.1	0.1	9.9	28.8	0.1	2.92	10.1
2.2	3.2	0	1.8	2.5	5.2	1.3	0.1	0	2.5	2	0.1	0.9	7.6	0.1	23.39	3.5
3.6	0.4	0	0.1	9.5	0.5	1.3	0.1	0	10.11	10.7	0.1	2.7	43.92	0	5.3	0.1
4.8	0.1	0.1	0	2.6	0.5	0.1	0.6	0.1	0	0	0.3	7.62	12.1	0	10.35	0.7
18.07	0.9	0.1	0	2.05	12.6	0.1	0.1	0.1	0.1	0.1	1.5	0.1	11	0.5	1	0.1
24.62	0.1	0.1	0.1	2.69	2.4	0.1	0.2	0.1	0.1	0.1	0.1	2.5	39.24	0.1	62.97	1.4
20.11	0.1	0	0	9.8	3.6	0.4	2.4	0	0.2	0.2	3.4	18.87	40.8	0.1	19.44	3.3
3.1	0.1	0	0	34.63	6.3	0.1	8.2	0.1	6	5.74	1.9	35.15	66.16	0.1	9.31	1.5
2.8	0.1	0	0	62.29	9	24.15	7.1	0.1	0.1	0.1	0.3	57.3	0.1	0.1	11.48	0.4
2.9	0.4	0.1	0	4	2.5	75.4	3.7	0.1	1.9	1.5	0.1	22.53	0.5	0.1	0.1	13.6
3	0.1	0	0	1.8	7.91	81.8	8.52	0.1	3.2	2.8	0.1	2.2	0.1	0.1	1.2	35.46
0.1	0.2	2.9	0.1	3.2	17.2	30.74	8.7	0.1	0.1	0.1	0.1	4.3	0.1	2.8	0.11	19.92
1.18	4.2	1.4	2.09	1.84	67.87	0.1	6.3	0.1	0.1	0.1	1.4	0.2	0.4	0.1	0.1	1.4
2.2	1	0.1	0.1	1.7	36.19	0.1	12	0.1	1	0.8	4.3	0.1	3.02	0.1	0.1	8.9
4.9	3.9	0.1	0.1	0.1	144.77	0.1	8.8	0.5	0.1	0.1	3.7	0.1	0.1	4.2	0.1	4.5
1.8	3.9	2.5	0.1	0.1	58.18	0.1	0.8	55.13	0.1	0.1	0.3	0.1	0.1	5.1	0.1	3.7
10.99	30.2	0.1	1.6	0.1	0.1	1.59	1.9	42.26	6.5	6.2	4	0.1	0.1	0.4	0.1	0.35
0.9	15.1	0.1	3.7	0.1	0.1	1.4	13.3	0.6	0.1	0.1	18.1	0.1	0.1	12.8	0.1	13.8
1.67	2.9	18.6	0	0.1	13.43	0.7	11.89	9.7	8	7.9	3	0.2	0.1	0.1	0.1	15.26
0.2	0.6	1.2	0.1	28.28	18.3	4.2	8.4	0.1	10.1	10.7	0.1	0.7	0.1	11	0.1	3.7
2.9	1	0.1	0.1	35.32	12.28	1.3	4.1	0.1	0.1	0.1	0.1	5	0.1	1.7	2.6	14.5
0.1	5.6	0.3	0	47.38	12.78	0.65	0.1	9.2	6.2	6	0.1	2.42	2	0.8	0.1	6.54
0.3	57.08	0.1	0.1	19.4	4.9	1.6	0.1	1.4	6.92	6.86	6	0.81	0.9	0.4	0.1	0.1
0.1	36.96	0.1	16.05	0.6	0.1	1.5	0.4	0.1	0.1	0.1	8	0.2	0.1	0.1	0.1	1.5
0.1	0.5	0.1	35.34	0.1	0.1	0.1	0.1	6.1	19.79	22.32	3.8	0.5	0.1	16.98	0.1	4.03
1.6	1.2	0.6	31	3.7	9.82	0.3	0.1	2.5	1.4	1	2.2	0.1	2.2	5.7	0.8	0.1
13.19	8.3	0.1	0.5	15.51	0.9	0.1	1.3	0.1	0.1	0.1	0.1	0.1	18.42	0.9	12.11	0.1
24.43	0.9	0	3.8	0.6	0.1	0.1	0.1	0.1	0.3	0.3	1.1	0.49	38.74	0.1	37.89	0
3.39	0.1	0	21.31	5.1	0.4	0.1	0.1	0.1	14.5	16.4	4.8	17.28	18.02	0.3	35.96	0.1
1.7	0.8	3.2	2.8	3.4	2.1	0	0.5	0.3	3.25	2.9	10.22	7.74	0.1	18.25	0.2	4.4
2.8	1	17.33	0	28.53	4.3	0.1	0.1	43.43	0	0	1.4	0.6	3.1	28.31	0.1	7.9
7.2	0.1	32.07	0	2.22	22.93	0.1	0.1	152	0.1	0.1	8.5	0.1	0.1	13.7	0.1	10.9
0.3	0.1	29.92	0.1	0.1	37.74	0.8	0.3	22	2.3	1.8	18.17	0.1	3.2	5.86	0.1	0.1
0.7	5	19.87	0.1	0.1	18.7	1	0.1	5.6	0.7	0.5	1.71	0.1	0.1	4.4	0.1	0.7
0.4	24.89	0.5	0.1	0.1	34.96	1.2	17.77	0.1	0	0	1	0.1	0.1	0.1	0.1	12.76
0.1	1.5	3.5	0	9.67	43.18	1.2	32.29	0	0.1	0.1	0.9	0.1	0.1	0.2	0.1	23.49
0.1	0.7	1.5	0	2.8	56.72	0.1	28.78	0.2	0	0	0.2	0.1	0.1	3.56	0.1	2.66
0.1	0.5	0	0.1	15.53	38.79	0.1	8.83	0.1	3.1	2.7	0.1	0.1	0.1	0.1	0.1	17.2
0.1	0.8	0	0	50.34	16.92	0.1	2	2.7	0.1	0.1	0.1	7.5	4.82	0.1	0.1	0.1
0.1	22.49	0	0	8.5	2	0.8	22.08	0	0.1	0.1	0	0.1	3	0.1	0.1	1.3
0.1	0.1	0	0	0.1	1.1	0.1	9.6	0.1	0	0	0.1	0.1	0.5	0.1	0.1	2.56
0.1	0.1	0	0	3.89	0.6	0.1	3.9	0.1	0.1	0.1	0.1	0.7	24.11	0.1	0.1	2.2
0.1	0.7	0.1	14	13.8	0.1	0.1	0.1	0.1	6.26	6	0.1	3.5	53.2	0.1	11.02	1
1.2	2.3	0.1	0.3	2.2	1.2	0.1	0	0.1	18.01	20.35	0.1	4.6	61.48	0.1	73.71	0.1
4.3	0.1	0	0.2	10.3	10.6	0.1	0.1	0.1	0.1	0.1	0.1	69.45	60.36	0.1	112.12	0.1
1.5	4.03	0.1	0	46.02	4.4	15.01	0.1	0.1	0.1	0.1	0	49.52	1.6	0	94.62	0
2.2	44.33	0	0	42.83	1.1	24.51	0	0.9	0.5	0.4	0	48.25	0.1	0	11.11	0
2.4	83.9	0.1	0.1	34.81	0.1	0.1	0.1	2.3	1.1	0.9	0.1	34.67	0.1	0	14.8	0.1
14.15	112.7	0.1	35.01	11.1	0.1	0	6.2	0.1	0.1	0.1	1.9	6.1	0.1	0.1	7	1.5
1.3	18.89	0	35.62	6.8	0.1	0.1	6.8	0.59	9	9.2	0.5	0.1	0.8	2.6	0.1	0.6
0.1	1.54	0	0.2	0.1	8.56	0.1	4.5	0.1	0.1	0.1	3.7	0.1	0.1	2.91	0.1	0.3
0.1	0.1	0.1	0.1	0.1	22.1	11.3	2.4	0.1	2.4	1.9	0.1	0.1	0.1	0.1	0.1	0.1
0.1	1.9	0.2	11.28	1.4	3.7	87.09	0.2	3.2	0.8	0.6	0.1	0.1	0.1	0.1	0.1	0.8
0.1	0.8	0	21.89	0.2	5.5	96.11	2.2	4.9	17.14	19.34	0.1	0.5	0.1	0.1	0.1	0.8
0.1	2.7	0	3.3	0.2	3.07	34.79	18.18	0.1	0.1	0.1	11.36	0.3	0.1	0	0.1	5.1
0.1	0.1	0	0	0.1	2.4	0.2	18.48	2	0.1	0.1	2.2	0.1	0.1	0.1	0.1	0.2
0.1	0	0	0	0.4	0.1	0.1	25.5	0	0	0	0.1	0.5	0.1	0.1	0.1	0.1
0.1	0.1	0	0	0.1	0	0	29.47	0	0	0	6.11	1.5	1.1	0.1	0.1	5.1
0.1	0.1	0	0	1.3	0.1	0	12.9	0	0	0	0.1	3	3.7	0.1	0.1	25.02
0.1	0	0	0	0.1	0.1	0	0.7	0	0	0	0.1	6.1	2.2	0.1	0.1	30.33
0.1	0	0	0	0.1	0.1	0	8.1	0	0	0	1.7	0.4	8	0.1	0.1	31.42
0.1	0	0	0	0	0.1	0	26	0	0	0	1.4	0.1	0.1	0	0.1	39.71
0.1	0	0	0	0	0.1	0	49.08	0	0	0	7.9	0.1	0.1	0.9	0.1	19.77
0.1	0	0	0	0	0	0	35.06	0	0	0	7.45	0.1	0.1	0.1	0.1	2.4
0.28	0	0	0	0	0	0	5.1	0	0	0	0.1	0.1	0.1	0	0.1	0
0.1	0	0	0	0	0	0	0.1	0	0	0	0.1	0	0	0.1	0.1	0
0.1	0	0	0	0	0	0	0.3	0	0	0	1.9	0	0	0.1	0.1	0
1.4	0	0	0	0	0	0	0.8	0	0	0	0.1	0	0	0	0.1	0.1
0.4	0	0	0	0	0	0	0.1	0	0	0	0.1	0	0	0	0.1	0
0.5	0	0	0	0	0	0	0.2	0	0	0	0.88	0	0	0	0.1	0
2.3	0	0	0	0	0	0	0.1	0	0.1	0.1	1.7	0	0	0.1	0.1	0
0.3	0	0	0	0	0	0	0.62	0	0.1	0.1	0.2	0	0	0.1	0.1	0
0.1	0	0	0	0	0	0	0.1	0	0	0	0.1	0	0	2.1	0	0.1
2.7	0.1	0	0	0	0.1	0	0.1	0	0	0	1	0	0	1.1	0.1	0
0.1	0.1	0	0	0	0.1	0	0.1	0	0	0	2.6	0.1	0.1	0.1	0.1	0.1
3.2	0	0	0	0	0	0	0.1	0	0	0	0.1	0.1	0.1	0.1	0.1	0.1
0.1	0.1	0	0	0	0	0	2	0	0	0	0.2	0.1	0.1	0.6	0.1	0.1
0.1	0.1	0	0	0	0	0	1.3	0	0.1	0.1	0.1	0.1	0	0.2	0.1	0.1
0.1	0	0	0	0	0	0.1	1.1	0	0	0	0.1	0	0	0.1	0.1	0
0.1	0	0	0	0	0	0	0.1	0	0	0	1.1	0	0	0	0.1	0
0.1	0	0	0	0	0	0	0.1	0	0	0	0.1	0	0	0	0.1	0
0.1	0.1	0	0.1	0	0	0	0	0	0.1	0.1	0.1	0	0	0	0.1	0
0	0	0	0	0	0	0	0	0	0	0	3.8	0	0	2.5	0.1	0.1
0.1	0.1	0	1	0	0	0	0	0	0.8	0.6	7.8	0	0.1	0	0.1	0.1
0.1	0.1	0.1	0.1	0	0.1	0	0	0.1	0.1	0.1	1.8	0	0	0.7	0.1	0.1
0.1	0.1	0	1	0	0	0	0.1	0	0.1	0.1	0.5	0.1	0	0.1	0.1	0
0.1	0.1	0	1.3	0.1	0.1	0	0.1	0	0.1	0.1	0	0.1	0.1	0	0.1	0.1
0.1	0.1	0	0	0.1	0.1	0	0.1	0	0	0	0.1	0.1	0.2	0	0.1	0
0.1	0.1	0.1	0	0.1	1.4	0.1	0.1	0.1	0	0	0	0.1	0.1	0	0	0.1
0.1	0.1	0.1	0	0.1	5.9	0.1	0.1	0	0	0	0.1	0.1	3.3	0.1	0	0.2
0.8	0.1	0	0	0.1	0.1	0.1	0.1	0	0	0	0	0	1.2	0	0.1	0.1
0.1	0	0	0	0	0.1	0.1	0	0	0	0	0	0.1	0.1	0	0.1	0
0.1	0	0	0	0	0	0	0	0	0	0	0.1	0.1	0	0	0	0
0.1	0	0	0	0	0	0	0	0	0	0	0.1	0	0	0	0.1	0
0.1	0	0	0	0	0	0	0	0	0	0	0.1	0	0	0	0.1	0.1
0.1	0	0	0	0	0	0	0	0	0	0	0.1	0	0.1	0	0.1	0
0	0	0	0	0	0.1	0	0	0	0	0	0	0.1	0.1	0.1	0.1	0.1
0	0	0	0	0	0.1	0	0	0	0	0	0.1	0.1	0	0.1	0	0
0	0	0	0	0	0	0	0	0	0	0	0.1	0	0.1	0	0	0
0.1	0	0	0	0	0	0	0	0	0	0	0.1	0	0.1	0	0.1	0
0	0	0	0	0	0	0	0	0	0	0	0.1	0.1	0	0	0.1	0
0	0	0	0	0	0	0	0	0	0	0	0	0	0	0	0.1	0
0	0	0	0	0	0	0.1	0	0	0	0	0	0.1	0	0	0.1	0
0	0	0	0	0	0	0.1	0	0	0	0	0	0	0	0	0	0
0	0.1	0	0.1	0	0	0.14	0	0	0	0	0	0	0	0	0	0
0	0.1	0	0.8	0	0	11.8	0	0	0.2	0.1	0	0.1	0	0	0	0
0	0.1	0	6	0.1	0	12.5	0	0	4.2	3.9	0	0.1	0	0	0	0
0	11.9	0	21.95	0.2	0.1	1	0	0.1	1.6	1.2	0	0	0	0	0	0
0	1.7	2.4	0.3	7.2	0.1	0	0	4.9	2.38	1.8	0	0.4	0.1	0	0	0
0	0.1	25.74	0	0	2.7	0	0	2.2	0.1	0.1	0	0	0.1	0.5	0.1	0
0	0.1	0	0	0	0	0	0.1	0.1	0	0	3.7	0.1	0	7.61	0.1	0.1
0	0	0	0	0	0	0	0.1	0	0	0	0.1	0	0	0	0	0
0	0	0	0	0	0	0	0	0	0	0	0	0	0	0	0.1	0
0	0	0	0	0	0	0	0	0	0	0	0.1	0	0.1	0	0	0
0	0	0	0	0	0	0	0	0	0	0	0	0	0	0	0.1	0
0	0	0	0	0	0	0	0	0	0	0	0	0	0	0	0	0
0	0.1	0	0	0.2	0.1	14.1	0	0	0	0	0	0.2	0.1	0	0	0
0.1	0.1	0.1	0	0.9	0.1	32.94	0	0.1	0	0	0	0.4	0.1	0	0.1	0.1
0.1	1.2	0.8	0	28.63	3.3	20.4	0	2.6	0	0	0.1	5.08	0.2	0.1	0.1	0.1
0.1	9.11	35.82	0.1	9	1.6	0.1	0	24.68	0	0	0.1	0.5	0.1	9.51	0.1	0
0.1	0.1	3.7	0	0.1	0.4	0	0	0.1	0	0	0.8	0.1	0.1	9.5	0.1	2.5
0.1	0	0	0	0.1	0.1	0	0.1	0	0	0	0	0.1	0.6	0	0.1	3
0.1	0.1	0	0	4.5	0.1	0	0	0.1	0	0	0	1.2	0	0	0.1	0
0	0.2	0	0	6.9	0.1	0	0	1.2	0.1	0.1	0	0.1	0	0	0	0
0.1	0	0.1	0	0.1	0.1	0	0	0.1	0	0	0	0.1	0.1	0	0.1	0
0.1	0	0	0	0	0	0	0	0	0	0	0	0.1	0.1	0	0.1	0
0	0	0	0	0.1	0.1	0	0	0	0	0	0	0.1	0	0	0.1	0
0	0	0	0	0	0.1	0	0	0	0	0	0	0.1	0	0	0	0
0	0	0	0	0	0	0	0	0	0	0	0	0	0	0	0	0
0	0	0	0	0	0	0	0	0	0	0	0	0	0	0	0	0
0	0	0	0	0	0	0	0	0	0	0	0	0	0	0	0	0
0	0	0	0	0	0	0	0	0	0	0	0	0	0	0	0	0
0	0	0	0	0	0	0	0	0	0	0	0	0	0	0	0	0
0	0	0	0	0	0	0	0	0	0	0	0	0	0	0	0	0
0	0	0	0	0	0	0	0	0	0	0	0	0	0	0	0	0
0	0	0	0	0	0	0	0	0	0	0	0	0	0	0	0	0
0	0	0	0	0	0	0	0	0	0	0	0	0	0	0	0	0
0.1	0	0	0	0	0	0	0	0	0	0	0	0	0	0	0.1	0
0.1	0	0	0	0	0	0	0	0	0	0	0	0	0.1	0	0.1	0
0.1	0	0	0	0.1	0	0	0	0	0	0	0	0.5	0.1	0	0.1	0
0.1	0	5.4	0.1	0.9	14.68	0	0	0.1	0.1	0.1	0	4.9	0.1	0.1	0.1	0.1
0	0	2.6	0	0	0.1	0	0	0	0	0	0.1	0.1	0.1	1.4	0.1	0.1
0.1	0	0	0	0	0	0	0	0	0	0	0	0.1	0.31	0	0.1	0
0.1	0	0	0	0	0	0	0	0	0	0	0	0	0	0	0.1	0
0	0	0	0	0	0	0	0	0	0	0	0	0	0	0	0.1	0
0	0	0	0	0	0	0	0	0	0	0	0	0.1	0	0	0.1	0
0.1	0	0	0	0	0	0	0	0	0	0	0	0.1	0	0	0.1	0
0.1	0	0	0	0	0	0	0	0	0.1	0.1	0	0.1	0	0	0.1	0
0	0	0	0.1	0	0	0	0	0	0.6	0.5	0	0	0	0	0	0
0	0	0	7.54	0	0	0	0	0	5.95	5.7	0	0	0	0	0	0
0	0	0	0	0	0	0	0	0.1	0	0	0	0	0	0	0	0
0.1	0	0	0	0	0	0	0	0	0	0	0	0	0	0	0	0
0	0	0	0	0	0	0	0	0	0	0	0	0	0	0	0	0
0	0	0	0.5	0	0	0	0	0	0.3	0.3	0	0	0	0	0	0
0	0	0	0	0	0	0	0	0	0	0	0	0	0	0	0	0
0	0	0	0	0	0	0	0	0	0	0	0	0	0	0	0	0
0	0	0	0.1	0	0	0	0	0	0.1	0.1	0	0	0	0	0	0
0	0	0	0.31	0	0	0	0	0	2.2	1.7	0	0	0	0	0	0
0	0	0	6.29	0	0	0.1	0	0	3.8	3.4	0	0	0	0	0	0
0	0	0	0.1	0	0	0.1	0	0.1	0	0	0	0	0	0	0	0
0	0	0.1	0	0	0.1	0	0	0	0	0	0	0	0	0	0	0.1
0	0	0	0	0	0	0	0	0	0	0	0	0	0	0	0	0
0	0	0	0	0	0	0	0	0	0	0	0	0	0	0	0	0
0	0.1	0	0.1	0	0	0	0	0.1	0.1	0.1	0	0	0	0	0	0
0	0.1	0.1	0	0	0	0	0	0	0	0	0	0	0.1	0.1	0	0
0	0	0	0	0	0	0	0.62	0	0	0	0	0	0	0	0	0.1
0	0	0	0	0	0	0	0	0	0	0	0	0	0	0	0	0
0	0	0	0	0	0	0	0	0	0	0	0	0	0	0	0	0
0	0.1	0	0.1	0	0	0	0	0.1	0	0	0	0	0.1	0	0.1	0
0.1	0.1	0.2	0.1	0	2.8	0	0	0.1	0.1	0.1	0.1	0	3.2	0.1	0.1	0.1
0.1	0	0	4.88	0	0.2	0	2.7	0	0.1	0.1	0.1	0.1	0.1	0.1	0.1	2.9
0.1	0	0.1	0.1	0	0.1	0	1.5	0.1	0.1	0.1	0.3	0	0	0.1	0	5.4
0.1	0	0.1	0	0	0	0	0.1	0.1	0	0	0.1	0	0	0	0	0.1
0.1	0	0.1	0	0	0	0	2.1	0	0	0	0	0	0	0	0	4.9
0.1	0	0	0	0	0.1	0	0.1	0	0	0	0	0	0.1	0	0.1	0.1
0.1	0	0	0	0	0.1	0	0	0	0	0	0	0.1	15.43	0	0.1	0
0.1	0	0	0	0	0.1	0	0	0	0	0	0	0	2.3	0	0.1	0
0	0	0	0	0	0.1	0	0	0	0	0	0	0	0	0	0.1	0
0	0	0	0	0	0	0	0	0	0	0	0	0.1	0	0	0.1	0
0	0	0	0	0	0	0	0	0	0	0	0	0.1	0	0	0.1	0
0	0	0	0	0	0	0	0	0	0.1	0.1	0	0	0	0	0	0
0	0	0	0	0	0	0	0	0	0	0	0	0.1	0	0	0	0
0	0	0	0	0	0	0	0	0	0	0	0	0.1	0	0	0	0
0	0	0	0.1	0	0	0	0	0	0.1	0.1	0	0	0	0	0	0
0	0.1	0	8	0	0	0	0	0	0.1	0.1	0	0	0	0	0	0
0	0.1	0	0.9	0	0	0	0	0	0.4	0.3	0	0	0	0	0	0
0	0	0	10.92	0	0	0	0	0	14.3	16.17	0	0	0	0	0	0
0	0.2	0	47.77	0.9	0	0.1	0	0.1	28.94	33.14	0	0.1	0	0	0.1	0
0.4	0.1	0.1	0.1	5.31	0.1	0	0	13.48	0.5	0.4	0	0.3	0.1	0	0.1	0
0	0	0.97	0	0	0.1	0	0	0.1	0.1	0.1	0	0	0.1	0	0.1	0
0	0	0	0	0	0	0	0	0	0	0	0	0	0	0	0	0.1
0	0	0	0	0	0	0	0	0	0.1	0.1	0	0	0	0	0	0.1
0	0.1	0	1.3	0	0	0	0	0	3.5	3.1	0	0	0	0	0	0
0	0.1	0	8.6	0	0	0	0	0.1	0.1	0.1	0	0	0	0	0	0
0	0.1	0	9.4	0.5	0	0	0	0.1	1.8	1.4	0	0	0	0.1	0	0
0	0	0.1	0.1	0	0.1	0	0	0.1	0.2	0.2	0	0	0	0.1	0	0
0	0	1.9	0	0	0	0	0	0	0	0	0	0	0	0.1	0	0.1
0	0	0	0	0	0	0	0	0	0	0	0.1	0	0	0.1	0	0.1
0	0	0	0	0	0	0	0.1	0	0	0	0	0	0	0	0	0
0	0	0	0	0	0	0	0	0	0	0	0	0	0	0	0	0
0	0.1	0	0.1	0	0	0	0	0	0.1	0.1	0	0.1	0.1	0	0	0
0	0.1	0	0.1	0.3	0	0	0	0	0.1	0.1	0	0.1	0.1	0	0	0
0	0.1	0.1	0	0.3	0.1	0	0	0.1	0	0	0	0.1	0.1	0.1	0	0
0	0	0	0	0	0	0	0.5	0	0	0	0.1	0	0.1	0.1	0.1	0.2
0	0	0	0	0	0	0	0.1	0	0	0	0	0.1	0.1	0	0.1	0.1
0	0	0	0	0.3	0	0	0.1	0	0	0	0	0	0.1	0	0.1	0
0	0.1	0	0.1	0.1	3.9	0	0	0.1	0.1	0.1	0	0	0.1	0.1	0	0.1
0	0	0	0.1	0	0.1	0	0.1	0.1	0.1	0.1	0.1	0	0.1	0	0	0
0	0	0.1	0.1	0	0	0	2.6	0.1	0.1	0.1	0	0	0	0.1	0	0.7
0	0	0	0	0	0	0	5.2	0	0	0	0	0	0	0.1	0	0.1
0	0	0.1	0.1	0	0	0	7.6	0.1	0	0	0.1	0	0	0.1	0	0.2
0	0	0	0	0	0	0	5.4	0	0	0	0.1	0	0	0.1	0	0
0	0.1	0	1.4	0	0	0.1	0.1	0	0.8	0.6	0	0	0	0	0	0
0.1	0.1	0.1	2.7	0.1	0.1	0	0	0.1	0.9	0.7	0	0	0	0	0	0.1
0.1	0	0	0	0	0	0	0.4	0	0	0	0	0.1	0.1	0	0.1	0.5
0.1	0	0	0	0	0	0	0.5	0	0	0	0	0.1	0.3	0	0.1	0
0	0	0	0.1	0	0	0	0	0	0.1	0.1	0	0.1	0	0	0.1	0
0	0.1	0	0.1	0.1	0	0	0	0.1	0.1	0.1	0	0.1	0	0	0.1	0
0	0.1	0	1.5	0.1	0	0	0	0.1	0.3	0.2	0	0	0	0	0.1	0
0	0.1	0	0	0	0.1	0	0	0.1	0	0	0.1	0	0.1	0.1	0.1	0.1
0	0.1	0.1	0	0.1	0	0	0.1	0.1	0.1	0.1	0	0	0	0	0.1	0.1
0	0	0	0	0	0	0	0.1	0	0	0	0	0	0	0	0	0
0	0	0	0	0	0	0	0	0	0	0	0	0	0	0	0	0
0.1	0	0	0.1	0	0	0	0	0	0.1	0.1	0	0	0.1	0	0	0
0.1	0	0.1	0.1	0.1	0.1	0	0	0	0.1	0.1	0	0.1	0.1	0	0	0.1
0.1	0.1	22.83	0.8	0	0.7	0	16.44	0.5	0.1	0.1	14.7	0	0.1	12.49	0	12.2
0	0	0.9	0.1	0	0	0	7.9	0	0.1	0.1	0.1	0	0	0	0	0
0	0	0	0	0	0	0	0	0	0	0	0	0	0	0	0	0
0	0	0	0	0	0	0	0	0	0.1	0.1	0	0	0	0	0	0
0	0	0	0	0	0	0	0	0	0.1	0.1	0	0	0	0	0	0
0	0	0	0	0	0	0	0	0	0.1	0.1	0	0	0	0	0	0
0	0	0	0.1	0	0	0	0	0	0.1	0.1	0	0	0	0	0	0.1
0	0	0.1	0	0	0	0	1	0.1	0.1	0.1	0.1	0	0	0	0	0.1
0	0	0	0	0	0	0	0	0	0.1	0.1	0.1	0	0	0	0	0
0	0	0	0	0	0	0.1	0	0	0	0	0	0	0	0	0	0
0	0	0	0	0	0	0	0	0	0.1	0.1	0	0	0	0	0.1	0
0.1	0.1	0	0.1	0	0	0	0	0	0.1	0.1	0	0	0	0	0.1	0
0.1	0	0	0	0	0	0	0	0	0	0	0	0	0	0	0.1	0
0	0	0	0	0	0	0	0	0	0.1	0.1	0	0	0.1	0	0.1	0
0	0	0	0	0	0	0	0	0	0	0	0	0	0	0	0.1	0
0.1	0	0	0	0	0	0	0	0	0	0	0	0	0	0	0.1	0
0.1	0	0	0	0	0	0	0	0	0	0	0	0	0	0	0	0
0.1	0	0	0	0	0	0	0	0	0	0	0	0	0	0	0	0
0.1	0	0	0	0	0	0	0	0	0	0	0	0	0	0	0	0
0.1	0	0	0	0	0	0	0	0	0	0	0	0	0	0	0.1	0
0.1	0	0	0	0	0	0	0	0	0	0	0	0	0	0	0	0
0.1	0	0	0	0	0	0	0	0	0	0	0	0	0	0	0.1	0
0.1	0	0	0.1	0	0	0	0	0	0.1	0.1	0	0	0	0	0.1	0
0	0.1	0.1	0.6	0.1	0.1	0	0	0.1	0.1	0.1	0	0	0	0	0.1	0
0.1	0	4.1	0	0	0.1	0	0.5	0	0	0	0.8	0	0	3.6	0	0.1
0.1	0	0	0	0	0	0	1.6	0	0	0	0.1	0	0	0.1	0	0.1
0.1	0	0	0.1	0	0	0	0.4	0	0.1	0.1	0.1	0	0	0	0	0
0.1	0	0	0	0	0	0	0.1	0	0	0	0	0	0	0	0	0
0.1	0	0	0	0	0	0	0	0	0	0	0	0	0	0	0	0
0.1	0	0	0	0	0	0	0	0	0.1	0.1	0	0	0	0	0	0
0.1	0.1	0	0	0	0	0	0	0	0	0	0	0	0	0	0	0
0.1	0	0	0	0	0	0	0	0	0	0	0.1	0	0	0	0	0
0.1	0	0	0	0	0	0	0	0	0.1	0.1	0	0	0	0	0	0
0.1	0	0	0	0	0	0	0	0	0	0	0	0	0	0	0.1	0
0.1	0.1	0	0	0	0	0	0	0	0	0	0	0	0.1	0	0.1	0
0.1	0.1	0	3.3	0.1	0	0.9	0	0	0.4	0.3	0	0	0.1	0	0.1	0
0.1	0.1	0.1	0	0.1	0.1	0	0	0.3	0.1	0.1	0.1	0.1	0	0	0.1	0.1
1	0	0.1	0	0	0	0	0	0.1	0.1	0.1	0.1	0	0.1	0.1	0	0.1
0.1	0	0	0	0	0.1	0	0.1	0	0	0	2.1	0	0.1	0	0.1	1.5
0.1	0	0	0.1	0	0	0	4.5	0	0.1	0.1	0.1	0	0.1	0	0	0.1
0	0	0	0	0	0	0	0.1	0	0	0	0.2	0	0	0	0	0
0	0.1	0	0	0	0	0	0.2	0.1	0.1	0.1	0.2	0	0	0	0	0
0.1	0.1	7.3	0	0	0.1	0	0.1	0.1	0	0	2.5	0	0.1	0.1	0	0.1
0	0.1	3.6	0	0	0.1	0	0.1	0.1	0	0	0.74	0	0.1	0.6	0	0.1
0.1	0.1	0	0	0.1	0.1	0	2.5	0	0	0	0	0.1	0.1	0	0.1	0.1
0.1	0.1	0	0.1	0	0.1	0	0.1	0	0	0	0	0	0.1	0	0.1	0
0.1	0	0	0	0.1	0.1	0	0.1	0.1	0	0	0.1	2.63	0.1	0	2.7	0
1.7	1.7	0	0.1	1.3	0.1	0	0.1	0.1	0	0	1.5	0.2	1	0	2.7	0.1
0.1	0.1	0.1	0.1	0.1	2.8	0	0	0.1	0.2	0.2	0	0	1.5	0	0.1	0.1
0.1	1.54	0	18.57	0.1	0.1	0.1	2.2	0.1	6.32	6	0	0	0.1	0	0	0.1
0.1	0.2	0	0.1	0.1	0.1	0.1	4.36	2.3	0	0	0	0	0.1	0	0	0.6
0.1	0.1	0.1	0	0.1	0.2	0	4.1	0.1	0	0	0.1	0.1	0.1	0	0	0.4
0.1	1.9	1.4	0.1	0.3	0.1	0	2.2	0.1	0.1	0.1	0.2	0.1	0.1	0.1	0.1	0.1
0.1	0	0	0	0.1	0.1	0	0.1	0.1	0	0	3.5	0.1	0.1	0	0.1	0.1
0.1	0	0	0	0	0	0	5	0	0	0	8.4	0.3	0.1	0.1	0.1	1.3
1.5	0	0	0	0	0	0.1	1.1	0	0	0	3.7	0.1	3.5	0.1	2.3	0.7
0.1	0	0	0	0	0	0	0.4	0	0	0	0.9	0.1	0.8	0	0.5	0.1
0.1	0	0	0	0	0	0	0	0	0.1	0.1	0.1	0	0.4	0	0.1	0.1
0.1	0.1	0	0.2	0.1	0	0	0	0.1	0.1	0.1	0.1	0	0.1	0	0.1	0.1
0.1	0	0.1	0	0	0	0	0	0.1	0	0	0.1	0	0.1	0.1	0.1	0.2
0.1	0	0	0	0	0	0	0	0	0	0	0.1	0	1.3	0.1	0.4	1.3
0.1	0	0	0	0	0	0	0	0	0	0	4.84	0.1	0.4	0.1	0.2	0.1
0.2	0.1	0	0	0.1	0	0	0	0	0	0	0.4	0.1	0.2	0.1	1.2	0.4
0.1	0.1	0	0	0	0	0	0	0	0	0	0.1	0.1	0.1	0	0.4	0
0.1	0.1	0	0	0.1	0.1	0	0	0	0	0	0.1	0	5.3	0	0.1	0
0.1	0.1	0	0	0	0.1	0	0	0	0	0	0.1	0	0.7	0	0.1	0.1
0.1	0.1	0	0	0	0.1	0	0	0	0	0	0.1	0	0.3	0	0.1	0.1
0.1	0.1	0	0.1	0	0.1	0	0	0	0	0	0.1	0	0.1	0	0	0.3
0.1	0.1	0	0	0.1	0	0	0.1	0	0	0	0.1	0.1	0.4	0	0	0.7
0.1	0.1	0	0	0	0.1	0	0	0	0	0	0	0	0.1	0	0.1	0
0.1	0.1	0	0	0	0.1	0.1	0	0.1	0	0	0.1	0.1	0.1	0	0	0
0.1	0.1	0	0.1	0	0.1	0.1	0	0.1	1.8	1.4	6.79	0	0	0	0.1	0.1
0.1	0.1	0.1	4.9	0	0.1	0.1	2.5	0.1	2.69	2.1	0.1	0	0	0.1	0.1	0.1
0.1	0	0.4	0.1	0	0.1	0.1	24.1	0	0	0	5	0	0.1	0.4	0.1	6.35
0.1	0	0	0	0	0	0.1	12.6	0	0.1	0.1	1.1	0	0.8	0.3	0.1	13.9
0.1	0	2.3	0	0	0	0.1	66.37	0	0.1	0.1	5.89	0	0.1	0.1	0.1	17.27
0.1	0	1.35	0	0	0.1	0.1	38.94	0	1.1	0.84	0.4	0	0	0.1	0.1	1.03
0.1	0.1	0	0.1	0	0	0.1	0	0	0	0	0	0.1	0	0	0.1	0
0.8	0.1	0	0	0.1	0.1	0.1	0	0	0	0	0	0.1	0	0	0.1	0
0.1	0	0	0	0.1	0.1	0	0	0	0	0	0.1	0.1	0.1	0	0.1	0
0.1	0	0	0	0.1	0	0	0.1	0	0	0	0.1	0.1	0.1	0	0.1	0
0.9	0	0	0	0	0	0	0.1	0	0	0	0	0	0.1	0	0.1	0
0.4	0.1	0	0	0.1	0	0	0.1	0	0	0	0.1	0	0.1	0	0.1	0
1.5	0.1	0	0.1	0.5	0.1	0	0.1	0	0.1	0.1	0.1	0.1	0	0	0.1	0
1.7	0.1	0	0.1	0.1	0.1	0.1	3.2	0.1	0	0	0.1	0	1.2	0	0.1	0
2.5	0	0	0	0.2	0.1	0.1	12.3	0.1	0	0	1.48	0	0.9	0.1	0.2	4.93
3.7	0	0.1	0	0.1	0	0.1	54.13	0	0	0	10.9	0.1	0	8.52	0.1	97.34
26.76	0	0	0	0	0	0.1	86.96	0	0	0	75.12	0	0.1	14.98	0.1	59.67
0.1	0	0	0	0	0	0.1	50.34	0	0	0	345.9	0	0.1	6.1	0.1	1.5
0.2	0	0	0	0	0.1	0.1	0.1	0	0	0	12.84	0	0.1	0	0.1	0
0.1	0	0	0	0	0.1	0.1	0.1	0	0	0	2.6	0	0.1	0	0.1	0
0.1	0	0	0	0	0	0.1	0	0	0	0	2.4	0	0.1	0	0.1	0
0.1	0	0	0	0	0	0.1	0	0	0	0	3.6	0	0.1	0	0.1	0
0.3	0	0	0	0	0.1	0.1	0.1	0	0	0	9.5	0	0.1	0.1	0.1	0
0.4	0	0	0.1	0	0.1	0.1	7.5	0.1	0	0	9.2	0	0.1	3.1	0.1	0
1.6	0	0	0	0	0	0.1	10.8	0	0	0	3.9	0	0.1	0.1	0.1	4.23
3.2	0	0	0	0	0	0.1	3.2	0	0	0	0.1	0	0	0	0.1	0.1
2.3	0.1	0	0	0	0	0.1	1.9	0	0	0	0.1	0	0	0	0.1	0
0.1	0.1	0	0	0	0.1	0.1	0.1	0	0	0	1.3	0.1	0.1	0	0.1	0
0.1	0	0	0	0	0	0.8	0	0	0	0	0.1	0.1	0	0	0.1	0
0.1	0.1	0	0.1	0	0.1	0.2	0	0	0	0	0.1	0.1	0	0	0.1	0
0.1	0.1	0	0.1	0	0.1	0.1	0.1	0	0	0	3	0.1	0	0	0.1	0
0.4	0.1	0	0	0	0.1	0.1	15.5	0	0	0	0.1	0.1	0	0.1	0.1	0.1
0.1	0	0	0	0	0.1	0	9.8	0	0	0	0	0.1	0	0.1	0.1	0.1
0.1	0	0	0	0	0.1	0.1	96.05	0	0	0	0.1	0.1	0	3.5	0.1	7.1
2.4	0	0.1	0	0	0	0.1	70.5	0	0	0	25.41	0.1	0	13.5	0.1	2.9
3.8	0	0	0	0	0.1	0.1	3.8	0	0	0	70.06	0.1	0.1	0.1	0.1	0.1
1.2	0	0	0	0	0.1	0.1	0.1	0	0	0	31.13	0.1	0.1	0.1	0.1	0
0.3	0	0.1	0	0	0	0.1	0.1	0	0	0	23.8	0.1	0.1	1.2	0.1	0
0.8	0	0	0	0	0	0.1	0	0	0.1	0.1	12.38	0.1	0.1	3.4	0.1	0
2	0	0	0	0	0	0.1	0	0	0	0	17.11	0.1	0.1	0.6	0.1	0.1
11.43	0	0	0	0	0.1	0.1	0.1	0	0	0	20.11	0.1	0.2	0	0.1	0
5.9	0	0	0	0	0.1	0.1	0.1	0	0	0	33.17	0.1	0.9	0.1	0.1	0
32.88	0	0	0	0	0.1	0.1	0.1	0	0	0	73.57	0.1	3.1	16.25	0.1	0.1
8.7	0	23.16	0	0	1.5	0.1	2.3	0	0.1	0.1	2.53	0.1	0.2	24.92	27.06	0.5
20.19	0	21.3	0	0.1	30.81	0.1	1.5	0.1	0.1	0.1	0.1	0.6	11	0.1	11.24	0.7
3.9	2.06	0	0.1	11.4	1.3	1.3	0.6	0	3.2	2.8	0.1	45.71	76.88	0	52.55	1.6
2.1	0.1	0.1	1.3	28.22	17.4	7.4	0.1	0	10.11	10.7	0.1	6.4	15.8	0.1	33.61	0.1
0.6	0.7	0	0.1	73.69	2.1	13.99	0.1	0.1	0	0	0.1	0.3	1.02	0.1	5.3	0.1
3.1	0.1	0.1	0.1	10.4	1.7	63.02	0.1	0.1	0.1	0.1	0.1	0.1	0.1	0.1	0.2	0.1
14.45	3.5	0	0.1	0.1	10.6	0.1	0.1	0.1	0.1	0.1	0.9	3.9	2	0	2.46	0.3
8.86	6.6	0	0.4	1	22.5	0.1	0.9	0.1	0.8	0.6	0.1	0.9	3.9	0	1.7	5.65
0.6	2	0	0	0.1	24.24	1.5	28.19	12.39	0.1	0.1	2.3	13.18	1.5	0.1	1	60.7
0.4	0.1	0	0.2	4.02	53.62	0.1	67.5	7.04	0.1	0.1	26.44	7.1	5.4	1.3	5	51.52
0.3	0.1	32.98	0.3	0.1	5.7	0.1	35.08	6.9	0	0	64.05	2	1	65.49	0.9	17.06
0.1	0	125.68	0	0.1	0.1	0.1	33.75	7.33	0.1	0.1	4.7	0.1	0.1	22.28	0.1	39.33
0.1	0	24.67	0.1	0.1	4	0.1	35.76	21.59	0	0	18.5	0.4	0.1	9.7	0.1	32.04
0.1	0	54.48	0	0.4	31.47	0.2	25.51	8.7	0	0	18.54	0.5	0.1	35.89	0.1	10.15
0.6	0	89.56	0	0.1	17.51	0.1	16.6	66.26	0.1	0.1	17.11	0.1	0.1	5.9	0.1	8.91
2.3	0.1	15.3	0	0.1	48.34	1.4	53.21	33.6	0.1	0.1	2.5	0.1	2.8	9.48	0.1	12.83
5.5	0.1	0.6	0	0.8	23	0.1	19.66	18.21	0.1	0.1	14.26	0.1	0.1	11.4	0.4	2.21
2.9	1.5	4.4	0.1	3.5	3.7	0.2	2.5	12.7	0.6	0.4	24.39	0.1	0.1	9.38	0.2	2.4
5.9	19.85	41.06	1.53	0.47	1.9	0.8	3.8	27.04	0.1	0.1	24.22	0.8	0.1	12.3	0.1	9.5
1.2	0.1	72.79	0	0	0.1	1.7	10.73	8	0.1	0.1	35.5	0.1	0.1	18.8	0.1	2.21
6.4	0	50.91	0	0	0	0.4	1.2	0.1	0.6	0.43	46.72	0.1	0.1	43.91	0.1	0.7
5.3	0	1.1	0	0	0.1	0.1	5.4	0.1	0	0	76.6	0.1	0.1	13.5	0.1	0.3
2.7	0	2.8	0	0.1	0	0.4	0	0	0	0	81.06	0.1	0.1	29.83	0.1	0.3
5.1	0	0.1	0	0.1	0	1.7	0.1	0.1	1.31	1	40.9	0.1	0.1	51.55	0.1	8.8
1	0	1.6	0	0	0.1	0.3	0	0.1	0.6	0.5	23.2	0.1	0.1	54.92	0.1	4.6
3.4	0	0.1	0.1	0	0.4	0.1	0.1	0	0.1	0.1	12.54	0.1	0.1	26.86	1.4	0
15.32	0.1	2.1	0	0	0.1	0.1	0.1	0	0.1	0.1	1.7	0.1	4.9	18.79	0.1	0.1
34.83	0	9.9	0	0	0.1	2	0.1	0.1	0.1	0.1	4.5	0.1	5	2.5	4.87	0.1
28.19	0.2	0	0	5.3	4.4	0.5	0.4	0.1	0.1	0.1	2	3.9	120.41	0.1	50.23	0.2
35.97	0.2	0.97	0.1	6.9	0.1	1.3	4.2	0.1	0	0	0.6	26.15	135.88	4.4	216.8	2.8
8.7	0.1	0.1	0.1	4.26	2	5.1	0.33	0.1	0.2	0.2	0.1	131.41	14.6	0.1	40.1	0.1
2.8	2.8	0	0.6	12.63	4.7	64.43	0.33	0.1	0.7	0.5	0.1	11.9	0.1	0.3	0.2	0.1
4	10.01	0.1	5.46	22.43	12.1	4.72	0.1	0.1	9.8	10.18	0.1	2.6	1.7	0.1	7.6	1.7
6.87	5.9	0	40.6	19.31	10.6	2.4	0.1	0.9	21.36	23.2	0.1	5.9	3.91	0.1	6.4	0.1
0.5	0.1	0.1	0.1	0.1	3.8	8.25	0.1	7.4	0.6	0.5	0.1	1.4	0.1	0	0.1	1
0.4	0.1	2	2	0.1	0.7	3.1	0.2	1.1	1.3	0.9	0.1	0.4	0.1	0.1	0.1	5.2
1.5	0.1	3.4	0.1	0.3	4.41	4.4	0.1	1.4	0.1	0.1	0	0.9	0.1	0	1.2	6.7
8.9	1.8	0.1	0.1	0.1	12.4	1.3	15.62	0.1	0.1	0.1	0.1	2.6	0.3	0	3.9	64.46
4.59	0.1	2.1	0	6.1	154.55	0.3	4.9	0.1	0	0	0.1	1	0.7	0.1	0.1	44.81
0.5	2	0.1	0	120.11	17.79	8.88	18.18	0.7	0	0	0.1	5.2	14.82	0.1	0.1	14.31
2	7	6.6	0	16.9	0.1	24.8	1.11	3.8	0.6	0.4	0.1	5.4	0.1	0.1	0.5	4.7
1.7	0.1	0.2	0.1	0.5	0.1	4.97	0.8	0.1	26.67	29.81	0.1	0.2	0.1	1.1	0.1	5.6
1.9	0.1	0	0.3	0.1	0.1	1.1	2.34	0.1	7.12	6.9	7.7	0.1	0.1	0.1	0.1	5.2
2.56	0.1	0.1	0.1	0.1	2.9	1	0.1	0.4	0.1	0.1	15.6	0.1	0.1	5.3	0.1	13.9
2.21	0.1	6.1	0	47.6	10.1	7.9	0.1	0.47	0	0	0.2	11.6	2.7	1.3	0.2	0.1
3.6	0.5	0.1	0	14.61	2.1	6.1	0.1	0.1	0	0	0.1	6.9	9.75	0.1	9.31	0.1
3.8	4.32	0	0	19.32	5.5	0.1	0.2	0	0.1	0.1	0.1	35.51	11.8	0.1	1.1	0.1
2.5	6.7	0.1	0.1	36.44	0.4	0.1	0.1	0	0.1	0.1	0.1	10.1	0.1	2.1	2.4	2
3.6	12.43	0.3	0	20.29	0.1	0.1	0.1	0.1	0.1	0.1	0.9	0.1	0.1	6	0.3	0.1
0.9	6.7	3.67	0.1	0.1	0.1	0.1	0	0	1.1	0.8	3.4	0.9	0.1	3.8	0.4	1.8
0.1	0.1	1.62	3.5	0.1	0.1	0.1	0.1	0.1	3	2.5	7.7	0.1	0.1	10.4	1.1	2.8
1.5	0.1	0.1	0	0.1	1.9	0.1	0	1.5	0	0	10.7	0.1	6.6	14.8	6	0.1
6	0	50.11	0	0.1	6	0.1	0	0	0	0	7.42	0.1	14.5	35.41	2.3	1.9
2.7	0	9.1	0	0.1	0.2	0.1	0.1	0	0	0	28.82	1.1	4.6	35.24	0.7	8.87
1.6	0	4.4	0	0	1.9	0	0.1	0	0	0	35.27	0.1	1	13.87	0.1	4.7
2.3	0	1.8	0	0	5.4	0	0.1	0	0	0	25.61	0.1	6.3	42.84	1.07	4.5
0.1	0	0	0	0.1	4.88	0	0.2	0	0	0	45.17	3.7	2.3	22.53	0.1	3.23
0.1	0	0	0	0.1	1.8	0	0.33	0	0.1	0.1	57.29	0.1	0.4	6.4	0.1	1.1
2.1	0.1	0	0.1	0.1	1.2	0.1	0.1	0	0.1	0.1	31.42	0.1	1.9	0	0.1	0.1
2.8	0.1	0	0	0.1	2.2	0	0.1	0	0	0	15.82	1.2	2.8	0	0.1	0.1
1	0	0	0	0.1	0.1	0	0.1	0	0	0	0.4	1.7	1.6	0	0.1	0.1
0.3	0	0	0	0	0	0	0	0	0	0	4.8	1.7	3.5	0	9.8	0
0.7	0	0	0	0	0	0.1	0	0	0	0	21	0.1	11.5	0	0.7	0
5.4	0	0	0	0	0	0.1	0.1	0	0	0	19.1	0	9.9	1.9	11.4	0.1
4.1	0.1	0	0	0	0	0.1	0.1	0	0	0	0.1	0.1	0.1	0.1	1.2	0.1
0.9	0	0	0	0	1.9	0	0.1	0	0	0	0.1	0	0.1	0	0.1	0.2
0.1	0	2	0	0	6.63	0	0.1	0.5	0	0	0.1	0	9.61	0.1	0.1	7.97
0.1	0.1	0.1	0.1	0.1	26.7	0.1	0.1	0.2	0.1	0.1	0.1	0.1	4.7	0.1	0.1	1.4
0.1	0.1	0.1	0.1	0	75.49	0.1	0.1	6.9	0	0	0.1	0	0.1	0.1	0.1	0.1
0.1	0.1	0.1	0	0.1	45.18	0.1	0.1	30.46	0	0	0.1	0.1	0.1	0.1	0.1	0.1
0.1	0.1	1.03	0	1.2	17.43	0.1	0.1	6.5	0	0	0.1	0.1	0.1	0.1	0.1	0.1
0.1	0.1	0.1	0	1.7	9.4	0	3.4	4.6	0	0	0.2	0.1	26.85	0.1	0.1	0.1
0.1	0.1	1.8	0	19.1	0.3	0	0.8	0.2	0	0	0.1	64.88	24.02	4.2	0.1	0.1
0.1	0.1	0.1	0	5.73	8.93	0.1	0.6	0.6	0	0	0.4	71.44	0.1	1.5	21.6	0.1
0.1	2.5	1.5	1	2.1	0.2	0.1	0.1	4.1	0.1	0.1	1.2	12.55	0.1	0.8	0.2	0.1
0.1	12.83	18.3	0.4	18.4	0.1	0.1	0.2	2	0.1	0.1	0.7	22.94	0.1	2.4	0.1	1.4
0.1	14.72	9.1	0.1	16.56	0.1	0.1	0.1	2.5	4.92	4.6	1.4	18.42	0.1	1.4	0.3	5.6
0.1	0.1	1.8	0.1	2.1	3	0.1	0.1	3.7	0.6	0.5	0.1	0.1	0.1	5.7	0.1	8.6
0.1	0.1	16.18	0.3	0.1	0.7	0	0.1	9.3	15.43	17.8	0.6	0.1	10.4	4.8	1.4	4.7
1.3	0.1	2.6	0	0.1	0.1	0	0.3	0	0	0	13.4	0.1	5.4	21.2	14.91	11.4
1.2	0	0	0	0	0.1	0	16.82	0	0	0	12.3	0.1	9.6	6.4	27.7	5.79
1.7	0	0	0	0	0	0	9.8	0	0	0	1	0.1	22.1	0.38	30.22	0.1
4.3	0.1	0	0	0	0.1	0	0.1	0	0	0	3.6	0.1	0.1	2.2	11.54	0.1
1	0	0	0	0	0.1	0	0.1	0	0	0	1.3	1.5	0.5	3.7	0.2	0.6
0.4	0	0	0	0	0.1	0	0.1	0	0	0	0.1	7.3	0.3	4.9	13.35	0.9
1.6	0	0	0	0.1	0.1	0	0.1	0	0	0	6.4	6.9	3.4	9.1	1.9	0.7
0.7	0	0	0	0.1	0.1	0	0.1	0	0	0	9.3	7.5	11.64	11.43	0.1	0.2
3.65	0	0	0	0	0.1	0	0.1	0	0	0	1.2	0.7	14	7.31	0.3	0.1
10	0	0.1	0	0	0.1	0	0.1	0	0	0	0.1	0.7	0.9	0.1	8.5	0.9
6.53	0	0	0	0	0.8	0	0.1	0.1	0	0	1.5	0.1	0.3	4.8	0.7	0.5
4.9	0	0	0	0	0.1	0	1	0	0	0	0.7	0.1	4.2	6.2	0.1	0.1
0.1	0	0	0	0	0	0.1	0.1	0	0	0	2.5	1.1	0.3	0.1	1.8	0.1
0.1	0.1	0	0.3	0	0	0	0.1	0	0.1	0.1	1.2	10	5.4	0.1	0.4	0
1	0	0	0.1	0.1	0.1	0	15.6	0	0.1	0.1	13.67	7.53	1.9	3	2.8	0.1
0.1	0	0.1	0	0	0	0	8	0	0	0	1.4	0.1	0.2	0.1	0.1	0.1
4.64	0	0	0	0	0	0	7.3	0	0	0	2.2	0	0.1	0.2	0.1	1.2
1.2	0	0	0	0	0.1	0	5.6	0	0	0	21.9	0	0.1	8.28	0.1	2.06
2.3	0	0	0	0	0.1	0	5.5	0	0.1	0.1	12.28	0	0.1	5.3	0.1	0.4
50.94	0	0.1	0	0	0	0	15.62	0.1	0	0	0.5	0	0	1.95	0.1	8.77
4.69	0	0	0	0	0	0	4.3	0	0	0	0.1	0.1	0	1.7	0.1	0.1
0.1	0	0	0	0	0.1	0	0.1	0	0	0	5.16	0	0	0	0	0
0.1	0	0	0	0	0	0	0.1	0	0	0	0.8	0.1	0	0	0	0.1
0.1	0	0	0	0	0	0	0	0	0	0	0.1	0.1	0.1	0	0.1	0.1
0.1	0	0	0	0	0	0	0	0	0	0	0.1	0	0	0	0.1	0
0.1	0	0	0	0	0	0	0	0	0	0	0.1	0	0	0	0.1	0
0.1	0	0	0	0	0	0	0	0	0	0	0.1	0	0	0	0.1	0
0.1	0	0	0	0	0	0	0.1	0	0	0	0	0	0	0	0.1	0.1
0.1	0	0	0	0	0	0	2.8	0	0	0	0	0	0	0	0.1	0.1
0	0	0	0	0	0	0	0.2	0	0	0	0.1	0	0	0	0.1	0
0	0	0	0	0	0	0	2.4	0	0	0	0.1	0	0	0	0.1	0
0	0	0	0	0	0	0	0.1	0	0	0	0.1	0	0	0.4	0	0
0.1	0	0	0	0	0	0	0	0	0	0	0	0	0	0	0	0
0.1	0	0	0	0	0	0	0	0	0	0	0.1	0	0	0	0.1	0
0.1	0	0	0	0	0	0	0.1	0	0	0	0.1	0	0	0	0.1	0
0.1	0	0	0	0.1	0	0	0	0	0	0	0.1	0	0	0	0.1	0
0.1	0	0	0	0	0	0	0	0	0	0	0.1	0.1	0	0	0.1	0
0.1	0	0	0	0	0	0	0	0	0	0	0.1	0.1	0	0	0	0.1
0.1	0.1	0	0	0	0	0	0	0	0	0	0.1	0	0	0	0.1	0
0.1	0	0	0	0	0	0	0	0	0	0	0.1	0	0	0	0	0
0	0	0	0	0	0	0	0	0	0	0	0.1	0	0	0	0.1	0
0	0	0	0	0	0.1	0	0	0	0	0	0	0.1	0	0	0.1	0
0.1	0.1	0	0	0	0	0	0	0	0	0	0	0.1	0	0	0.1	0
0.1	0.1	0	0	0.1	0	0	0	0.1	0	0	0	0.1	0.1	0	0.1	0
0.1	0.3	0.1	0.1	2.1	0.1	0	0	4.88	0	0	0	0.1	0.1	0	0.1	0
0.1	0.1	3.3	0.1	0.1	0.1	0	0	0	0.1	0.1	0	0.1	0.1	0	0	0
0.1	0.1	0	0	0	0	0	0.1	0	0.1	0.1	0	0	0	0.1	0	0.1
0.1	0	0	0	0	0	0	0.3	0	0	0	0.1	0	0	0	0	0.1
0.1	0	0	0	0	0	0	0	0	0	0	0	0	0	0	0	0
0.1	0	0	0	0	0	0	0	0	0	0	0	0	0	0	0	0
0	0	0	0	0	0	0	0	0	0	0	0	0	0	0	0	0
0	0	0	0	0	0	0	0	0	0	0	0	0	0	0	0	0
0	0	0	0	0	0	0	0	0	0	0	0	0	0	0	0	0
0	0	0	0	0	0	0	0	0	0	0	0	0	0	0	0	0
0	0	0	0	0	0	0	0	0	0	0	0	0	0	0	0	0
0.2	0	0	0	0	0	0	0	0	0	0	0	0	3.6	0	0.1	0
1.79	0	0	0	0	0.1	0	0	0	0	0	0	0	2.7	0	0.1	0
6.7	0	0	0	0	0	0	0	0	0	0	0	0.1	0.1	0	0.1	0
0.1	0	0	0	0	0	0.1	0	0	0	0	0	0.1	0.1	0	0.1	0
0	0	0	0	0.1	0.1	0.1	0	0.1	0	0	0	0	0.1	0	0.1	0
0	2	0	18.57	0.1	0	2.2	0	0.1	2.5	2	0	0.1	0	0	0.1	0
0.1	0.1	0.1	0.8	0.1	0.1	0.1	0	0.1	0.5	0.4	0	0.1	0	0	0.1	0
0	0.1	0	0	0.1	0.1	0	0	0	0	0	0	0.1	0.1	0	0.1	0
0	0.1	0	1	0.1	0	0	0	0	0.1	0.1	0	0.1	0	0	0	0
0	0	0	0.1	0	0	0	0	0	0	0	0	0	0	0	0	0
0	0	0	0	0	0	0	0	0	0	0	0	0	0	0	0	0
0	0	0	0	0	0	0	0	0	0	0	0	0	0	0	0	0
0	0	0	0	0	0	0	0	0	0	0	0	0	0	0	0	0
0	0	0	0	0	0	0	0	0	0	0	0	0	0	0	0	0
0	0	0	0	0	0	0	0	0	0	0	0	0	0	0	0	0
0	0	0	0	0	0	0	0	0	0	0	0	0	0	0	0	0
0	0	0	0	0	0	0	0	0	0	0	0	0	0	0	0	0
0	0	0	0	0	0	0	0	0	0	0	0	0	0	0	0	0
0.1	0	0	0	0	0	0	0	0	0	0	0	0	0	0	0	0
0.1	0	0	0	0	0	0	0	0	0	0	0	0	0.1	0	0.1	0
0.1	0	0	0	0	0	0	0	0	0	0	0	0	0	0	0.1	0
0.1	0	0	0	0	0	0	0	0	0	0	0	0	0	0	0.1	0
0	0	0	0	0	0	0	0	0	0	0	0	0	0	0	0	0
0	0	0	0	0	0	0	0	0	0	0	0	0	0	0	0	0
0	0	0	0	0	0	0	0	0	0	0	0	0	0	0	0	0
0.1	0	0	0.1	0	0	0	0	0	0	0	0	0	0	0	0	0
0.1	0	0	0.1	0	0	0	0	0	0	0	0	0	0	0	0	0
0	0.1	0	0.8	0.1	0	0	0	0	0.2	0.2	0	0.1	0	0	0	0
0	0	0	2	0.1	0	0	0	0	2.5	2	0	0	0.1	0	0	0
0	0	0	0	0	0	0	0	0	0	0	0	0	0	0	0	0
0	0	0	0	0	0	0	0	0	0	0	0	0	0	0	0	0
0	0	0	0	0	0	0	0	0	0	0	0	0	0	0	0	0
0	0	0	0	0	0	0	0	0	0	0	0.1	0	0	0.1	0	0
0.1	0	0.1	0.1	0	0.1	0	0	0	0.1	0.1	0.1	0.1	0.1	0.2	0.1	0.1
0.1	0	0	0	0	0.1	0	0.1	0	0	0	0.4	0.2	0.5	0.5	0.1	0.6
0.1	0	0	0	0	0	0	0	0	0	0	0	0	0.1	0	0.1	0.1
0.1	0	0	0	0	0	0	0	0	0	0	0	0	0	0	0.1	0
0	0	0	0	0	0	0	0	0	0	0	0	0	0	0	0.1	0
0	0	0	0	0	0	0	0	0	0	0	0	0	0	0	0.1	0
0	0	0	0	0	0	0	0	0	0	0	0	0	0	0	0	0
0	0	0	0	0	0	0	0	0	0	0	0	0	0	0	0	0
0	0	0	0	0	0	0	0	0	0	0	0	0	0	0	0	0
0	0	0	0	0	0	0	0	0	0	0	0	0	0	0	0	0
0	0	0	0	0	0	0	0	0	0	0	0	0	0	0	0	0
0	0	0	0	0	0	0	0	0	0	0	0	0	0	0	0	0
0	0	0	0	0	0	0	0	0	0	0	0	0	0	0	0	0
0.1	0	0	0	0	0	0	0	0	0	0	0	0	0	0	0	0
0	0	0	0	0	0	0	0	0	0	0	0	0	0	0	0.1	0
0	0	0	0	0	0	0	0	0	0	0	0	0	0	0	0	0
0	0	0	0	0	0	0	0	0	0	0	0	0	0.1	0	0.1	0
0.1	0	0	0	0.1	0	0	0	0.1	0	0	0	0.1	0.1	0	0	0
0.1	0	0	0	0.1	0.1	0	0	0	0	0	0	0.1	0	0	0.1	0
0	0.1	0	0	0.1	0	0	0	0	0	0	0	0.1	0.1	0	0.1	0
0.1	0.1	0	0.1	0.1	0.1	0	0	0	0	0	0	0.1	0.1	0	0.1	0
0	1.7	0	9.9	0.2	0	0	0	0	5.3	5	0	0.1	0	0	0	0
0.1	0.1	0	0.1	1.6	0	0	0	1	0	0	0	0.1	0	0	0.1	0
0	0	0.1	0	0	0	0	0	0.1	0	0	0	0.1	0	0	0.1	0
0	0	0	0	0	0	0	0	0	0	0	0	0.1	0.1	0	0	0
0	0	0	0	0.1	0	0	0	0	0	0	0	0.1	0	0	0	0
0	0.1	0	0	0.1	0	0	0	0	0	0	0	0.1	0.1	0	0.1	0
0	0	0	0	0.1	0	0	0.1	0	0	0	0	0.1	0.1	0	0.1	0
0	0	0	0	0.1	0	0	0	0	0	0	0	0.1	0	0	0.1	0
0	0.1	0	0	0.1	0	0	0	0	0	0	0	0.4	0.1	0	0.1	0
0	0.8	0	0	1.6	0	0	0	0.1	0	0	0	0.4	0	0	0	0
0	0.1	0	0.3	2.1	0	0	0	0.5	0.1	0.1	0	0.1	0	0	0	0
0	0.1	0.1	5.91	0.3	0	0	0	2.4	2.1	1.6	0	0.1	0	0	0	0
0	0	3	0	0.1	0.1	0	0	0.1	0	0	0	0	0	0	0	0
0	0	0	0	0	0	0	0	0	0	0	0	0	0	0	0	0
0	0.1	0	2.6	0.1	0	0	0	0	0.2	0.1	0	0	0	0	0	0
0	0	0.1	2.4	0	0.1	0.1	0	0.1	3.25	2.9	0	0	0	0	0	0
0	0	0.87	0	0	0.1	0	0	0.1	0	0	0	0	0	0	0	0
0	0	11.05	0	0	0.1	0	0	0.8	0.1	0.1	0.1	0	0.1	10.97	0.1	0.4
0.1	0	0.1	0	0	0	0	5.73	0	0	0	17.2	0	0	1.7	0	2.1
0	0	0	0	0	0	0	0	0	0	0	0	0	0	0	0	0
0	0	0	0	0	0	0	0	0	0	0	0	0	0	0	0	0
0	0	0	0.1	0	0	0	0	0	0.1	0.1	0	0	0	0	0	0
0	0	0	0	0	0	0	0	0	0	0	0	0	0	0	0	0
0	0	0	0.1	0	0	0	0	0	0.1	0.1	0	0	0	0	0	0
0	0	0	0.1	0	0	0	0	0	0.1	0.1	0	0	0	0	0	0
0	0	0	0	0	0	0	0	0	0	0	0	0	0	0	0	0
0	0	0	0	0	0	0	0	0	0	0	0	0	0	0	0	0
0	0	0	0	0	0	0	0	0	0	0	0	0	0	0	0	0
0	0	0	0	0	0	0	0	0	0.1	0.1	0	0	0	0	0	0
0	0	0	0	0	0	0	0	0	0	0	0	0	0	0	0	0
0	0	0	0	0	0	0	0	0	0	0	0	0	0	0	0	0
0	0	0	0.1	0	0	0	0	0	0	0	0	0	0	0	0	0
0	0	0	0	0	0	0	0	0	0	0	0	0	0	0	0	0
0	0	0	0	0	0	0	0	0	0	0	0	0	0	0	0	0
0	0	0	0	0	0	0	0	0	0	0	0	0	0	0	0	0
0	0	0	0	0	0	0	0	0	0	0	0	0	0	0	0	0
0	0	0	0	0	0	0	0	0	0	0	0	0	0	0	0	0
0	0	0	0	0	0	0	0	0	0	0	0	0	0	0	0	0
0	0	0	0	0	0	0	0	0	0	0	0	0	0	0	0	0
0	0	0	0	0	0	0	0	0	0	0	0	0	0	0	0	0
0	0	0	0	0	0	0	0	0	0	0	0	0	0	0	0	0
0	0	0	0	0	0	0	0	0	0.1	0.1	0	0	0	0	0	0
0	0	0	0	0	0	0	0	0	0	0	0	0	0	0	0	0
0	0	0	0	0	0	0	0	0	0	0	0	0	0	0	0	0
0	0	0	0.1	0	0	0	0	0	0.1	0.1	0	0	0	0	0	0
0	0	0	0	0	0	0	0	0	0	0	0	0	0	0	0	0
0	0	0	0	0	0	0	0	0	0	0	0	0	0	0	0	0
0	0	0	0	0	0	0	0	0	0	0	0	0	0	0	0	0
0	0	0	0	0	0	0	0	0	0	0	0	0	0	0	0	0
0	0	0	0.1	0	0	0	0	0	0.1	0.1	0	0	0	0	0	0
0	0	0	0.1	0	0	0	0	0	0.1	0.1	0	0	0	0	0	0
0	0	0	0	0	0	0	0	0	0	0	0	0	0	0	0	0
0	0	0	0	0	0	0	0	0	0.1	0.1	0	0	0	0	0	0
0	0	0	0	0	0	0	0	0	0	0	0	0	0	0	0	0
0.1	0	0.1	0	0	0	0	0	0	0	0	0	0	0	0	0.1	0
0.1	0	1	0	0	0	0	0	0	0	0	0.1	0.1	0	0.1	0.1	0.1
0.1	0	0	0	0	0.1	0	0	0	0	0	0	0.1	0	0	0.1	0.35
0	0	0	0	0	0	0	0.1	0	0	0	0	0	0	0	0.1	0.2
0	0	0	0	0	0	0	0	0	0.1	0.1	0	0	0	0	0	0
0	0	0	0	0	0	0	0	0	0.1	0.1	0	0	0	0	0	0
0	0.1	0	0.7	0	0	0	0	0	1.9	1.4	0	0	0	0	0	0
0	0	0	0	0	0	0	0	0.1	0	0	0	0	0	0	0	0.1
0.1	0.1	0	0	0	0	0	0	0.1	0.1	0.1	0	0	0	0	0	0
0.1	0	0	0	0.1	0	0	0	0	0	0	0	0	0	0	0	0
0.1	0	0	0	0	0.1	0	0	0.1	0.1	0.1	0	0	0	0	0	0.1
0	0.1	0	0.8	0	0	0	0.1	0	0.2	0.1	0.1	0	0	0.1	0	0.4
0	0	0	0	0	0	0	0	0	0	0	0	0	0	0	0	0
0.1	0.1	0	1.5	0.1	0	0	0	0.1	0.1	0.1	0	0	0	0	0	0
0.1	0.1	0	0.1	0.1	0	0.1	0	0	0	0	0	0	0	0	0.1	0
0.1	0.1	0	0.1	0.1	0	0	0	0.1	0.1	0.1	0	0.1	0.1	0	0.1	0
0	0	0	0	0	0	0	0	0	0	0	0	0	0	0	0.1	0
0.1	0	0	0	0	0	0	0	0	0	0	0	0	0	0	0	0
0	0	0	0	0	0	0	0	0	0	0	0	0	0	0	0	0
0	0	0	0	0	0	0	0	0	0	0	0	0	0	0	0	0
0	0	0	0	0	0	0	0	0	0	0	0	0	0	0	0	0
0	0	0	0	0	0	0	0	0	0	0	0	0	0	0	0	0
0.1	0	0	0	0	0	0	0	0	0	0	0	0	0	0	0	0
0.2	0	0	0	0	0	0	0	0	0	0	0	0	0.1	0	0.1	0.1
0.1	0	0	0	0	0	0	0	0	0	0	0	0	0.1	0	0.1	0.1
0.1	0	0	0	0.1	0	29.04	0	0	0	0	0	0	0.1	0	0.1	0
1.18	0.1	0	0	0	0	0.1	0	0	0	0	0	0.1	0.1	0	0.1	0
1	0	0	0	0	0	0	0	0	0	0	0	0.1	0.1	0	0.1	0
0.1	0	0	0	0	0	0	0	0	0	0	0	0	0	0	0	0.1
0.1	0	0	0	0	0	0	0	0	0	0	0.1	0	0	0	0	0
0	0	0	0	0	0	0	0	0	0	0	0.1	0	0	0	0	0
0.1	0	0	0	0	0	0	0	0	0	0	0.1	0	0	0	0	0
0.1	0	0	0	0	0	0	0	0	0	0	1.6	0	0	0	0	0
0.1	0	0	0	0.1	0	0	0	0	0	0	3.3	0.1	0.1	0	0	0
0.1	0.1	0	0.1	0.1	0.1	0	0	0	0.1	0.1	0.1	0.1	0.1	0	0.1	0
0.1	0.1	0	0.1	0.1	0	0.1	0	0	0.1	0.1	0.1	0	0.2	0	0.1	0
0.1	0.1	0.1	0.1	0.1	0.6	0	0	0.1	0.1	0.1	0	0.1	0.1	0	0.9	0
0.1	0	1.3	0.3	0	0.1	0	0	0.1	0.1	0.1	0	0	0	0.1	0	0.1
0.1	0	0	0	0	0	0	0.1	0	0	0	0.1	0	0	0	0	0.1
0	0	0	0	0	0	0	0.1	0	0	0	0.1	0	0	0	0	0
0.1	0	0	0	0	0	0	0.1	0	0	0	0.1	0	0	0	0	0
0.8	0.1	0	0	0.1	0	0	0	0	0	0	0.1	0.1	0.1	0	0.1	0
0.1	0.1	0	0	2	0.1	0	0	0	0	0	0.1	0	0.1	0	0.3	0.1
0.1	0.1	0	0	0.1	0.1	0	0	0.1	0	0	0.1	1.8	0.1	0	0.4	0.1
0.1	0.1	0	0	0.1	0.1	0	0.1	0	0	0	0	1	1.4	0	0.1	0.2
0.1	0.1	0	0.1	0.1	0.1	0	0	0	0	0	0	0.6	0.9	0	0.1	0
0.1	0.1	0	0	4.1	1.5	0	0	0	0	0	0	0.4	0.1	0	0.1	0.1
0.2	0.7	0.3	6.9	2.4	1.9	0	0	0.1	3.59	3.2	0	2.8	3.9	0	0.2	0.1
0.1	0.1	0.1	1.1	3.7	2.5	0	3.7	0.7	1.7	1.3	0.1	0.1	0.2	0.1	0.1	0.4
0.1	0.1	0.1	5.2	0.1	0.1	0	3.7	0.1	3.5	3.03	0.4	0.1	1.8	0.1	0.1	0.7
0.1	0.4	0.1	0.1	1	3.5	0	1.65	0.1	2.5	2	4.7	0	0.1	0.1	0	0.8
0	0	0.1	0	0.1	2.3	0	11.98	0.5	0	0	0.6	0	0.1	0.1	0	3.3
0	0.1	0	2	0.1	0.1	0	4.4	0.1	0.1	0.1	12.51	0	0.1	1	0	2.1
0	0.1	0.1	15.38	0.1	1.35	0.1	0.1	0.17	1	0.8	1.2	0	0.1	0	0	0.1
0	0.1	1.2	0	1	0.1	0.1	1.2	2.96	0.1	0.1	0.1	0	0.1	0	0.1	0.1
0	0	0.1	0.1	0.1	0.1	0	0.2	0.3	0.1	0.1	0.1	0	0.1	0	0	0.7
0	0.1	0	0	0	0	0	0.1	0	0	0	0	0.1	0.1	0	0.1	0.1
0.1	0	0	0	0	0	0	0.1	0	0	0	0	0.1	0	0	0.1	0
0.1	0	0	0	0.1	0	0	0	0	0	0	0	0	0	0	0.1	0
0.1	0	0	0	0.1	0	0	0	0	0	0	0	0	0	0	0.1	0.1
0.1	0	0	0	0.1	0	0	0	0	0	0	0.1	0	0.1	0	0	0
0.1	0.1	0	0	0.1	0	0	0	0	0	0	0.1	0	0	0	0	0.4
0	0.1	0.1	0	0.1	0	0	0	0.1	0	0	5.7	0	0	0	0	0
0.1	0.1	0.1	0	0.1	0.1	0	0.3	0	0	0	5.9	0	0	0	0	0.5
0.1	0.1	0.1	0	0	0.1	0	12.22	0.1	0	0	0.1	0	0.1	0	0	0.6
0.1	0	0.1	0.1	0.1	0.1	0	0.6	0.1	0.1	0.1	0.4	0	0	0	0	0.1
0.1	0.1	0.1	0	0	0.1	0	0.1	0.1	0	0	0.1	0.1	0	0.1	0	0
0.1	0.1	0.1	0	0.1	0.1	0	0.1	0	0	0	0.6	0.1	0.1	0.3	0.1	0.1
1.4	0	0	0	0	0.1	0	0.1	0	0	0	1.35	0	0.1	0.1	0.1	5.2
0.1	0	0.1	0	0	0	0	8.01	0	0	0	38.62	0	0.1	0.1	0	1.5
0.1	0	0	0	0	0	0	0.1	0	0	0	10.69	0	0	0.1	0.1	1.3
0.1	0	0	0	0	0	0	0.1	0	0	0	20.07	0	0.1	0.1	0	0.2
0.1	0	0.1	0	0	0.1	0.1	1.8	0.1	0	0	31.4	0	0	0.1	0	0.1
0.1	0.1	0	0	0	0.1	0.1	0.1	0.1	0	0	13.61	0	0	0.1	0.1	1
0.1	0.1	0.1	0.7	0	0	0.1	0.1	1.2	0	0	18.9	0	0	0.2	0	1.6
0.1	0.1	0	1.6	0	0.74	0.1	0.2	0	0.1	0.1	22.42	0	0	0.1	0.1	5.2
1.7	0.1	1.4	0.2	0.1	0.1	0.1	0.1	0.1	0.1	0.1	3.1	0	0.3	2.8	0	0.1
11.81	0.1	0.1	0.48	1.4	3.4	0	17.47	0.4	0.1	0.1	0.1	0.5	7.01	1.8	0.9	7.69
24.62	0.4	2	0.1	1.65	9.4	0	0.1	0.1	0.1	0.1	0.1	2.5	40.87	0.1	12.23	0.4
0.96	0.1	5.5	0	1.4	31.48	0.1	1	0.1	0	0	0.1	13.99	73.99	0.1	5.3	0.3
6.6	0.3	6.8	0	0.1	58.7	0.1	1.7	9.1	0.1	0.1	0.1	20.7	1.3	1.8	23.22	0.1
12.06	6.2	2	0	9.97	24.73	0.1	0.7	29.63	0.1	0.1	0.3	0.2	1.94	2.3	11.8	0.1
2.2	55.89	4.4	17.85	13.26	9.11	0.1	2.5	26.58	6.8	6.63	8.4	1.9	0.1	0.1	0.1	0.1
1.4	26.7	6.6	87.99	6.22	0.1	0.1	0.1	10.89	29.4	33.92	2	0.1	0.1	2	0.1	0.1
7.03	27.5	0.1	50.68	0.1	0.1	0.1	0.1	1.7	28.5	31.62	11.59	0.1	0.1	7.75	0.1	9.35
7.5	0.2	0.1	18.57	0	0.4	0.1	4.1	0.1	2.4	1.97	42.88	0.1	0.1	67.03	0.1	10.6
7.6	0.1	48.49	0.9	0.1	0.1	0.1	0.3	0.7	0.1	0.1	18.1	0.1	0.1	65.18	0.1	13
3	4.8	86.79	0.3	0.1	4	0.1	0.1	6.5	7.7	7.59	1.5	0.1	0.1	69.39	0.1	11.43
10.78	0.1	77.16	0	5.29	7.93	0.1	0.1	5.3	0	0	0.1	0.1	0.4	12.5	0.8	0.1
31.87	0.1	1.03	0	8.1	38.32	3.5	2.6	3.73	0	0	0.1	5.1	0.1	0.1	11.32	1.2
34.87	2.2	0	0	17.9	4.2	7.8	11.96	0	0	0	0.1	0.49	9.2	0.1	1.1	22.22
25.29	0.1	4.6	0	22.18	16.02	13.11	18.3	0.1	0.3	0.3	0.1	5.4	23.96	1.2	4.7	34.32
21.39	0.1	19.83	0	11.77	66.22	0.1	18.05	11.7	0.1	0.1	1.9	3.1	41.02	1.7	3.3	27.21
9.53	0.1	36.7	1.7	189.14	4.73	0.3	8.6	24.29	9	9.27	7.5	17.27	2.39	37.8	2.1	7.4
1.5	0.1	30.14	3.26	38.77	5.7	1	3.2	54.38	0.1	0.1	21.79	1.3	1.8	25.52	0.1	1
0.5	0	43.51	0	0.1	9.7	0.4	0.1	16.2	0	0	12.8	0.1	0.1	23.91	0.1	1.3
0.4	0	7.6	0	0.1	0.1	0.1	6.1	0	0	0	28.65	0.1	0.1	4.9	0.1	2.3
3.7	0	0	0	0	0.1	0.1	14.8	0	0	0	18.2	0.1	0.1	0	0.1	0.8
7.1	0	0	0	0	0.1	0.1	42.87	0.1	0	0	5.2	0.1	0.1	0.1	0.1	0.8
7.76	0	2.7	0	0	0.1	0.1	78.65	0.1	0.1	0.1	18.2	0.1	0.1	0.1	0.1	32.37
1.4	0	9.1	0.1	0	0.1	0.1	23.52	0	0.1	0.1	19.99	0.1	0.1	14.5	0.1	64.06
2.3	0.1	12.5	0.1	0.1	2.8	0.1	1.2	0.1	0.1	0.1	0.1	0.1	0.1	7.6	0.1	36.17
3.8	0.1	4.79	0.1	0.1	81.09	0.1	1.7	1.7	0.1	0.1	0.1	0.1	0.5	0.1	0.1	12.2
1.8	0.1	3.3	0.1	9.01	151.83	0.1	6.4	3.4	0.1	0.1	2.5	0.1	0.8	4.6	0.1	15.2
4.4	0.3	2.49	0	2	58.88	0.1	3.6	8.07	0.1	0.1	8.13	0.1	0.1	17.36	0.1	10.4
4.46	0.1	1.9	0	0.3	67.14	0.1	0.1	8.4	0	0	5.27	0.1	0.1	12.04	0.1	10.8
0.3	0.1	13.2	0	0.7	23.16	0.1	3.2	16.85	0.1	0.1	2.2	0.5	0.1	6.21	0.3	7.09
3.2	0.1	2.54	0.1	0.1	34.78	0.1	0.3	5.9	0.1	0.1	0.1	3.1	20.31	0.1	1.3	10.2
16.92	0.7	0.1	0	2.4	5.1	0.1	5.3	0.1	0.9	0.7	0.1	13.59	51.47	0.1	11.41	5.3
20.88	13.27	0.3	2.2	2.4	39.97	0.1	12.98	0.1	0.1	0.1	9.3	13.9	32.08	10.3	0.3	21.07
40.49	7.5	15.1	1.5	5.53	27.55	0.1	7.9	17.26	4.19	3.9	12.29	4.6	0.1	21.2	2.4	0.9
18.69	30.5	9.7	3.5	11.38	2	0.1	8.4	41.94	10.6	11.35	20.43	0.1	0.1	23.64	3.86	3.8
3.8	0.1	49.69	0	0.1	13.66	0.1	11.12	12.51	0.1	0.1	29.77	4.7	0.1	20.85	0.5	2.9
2.1	0	29.04	0.1	0	0.4	0.1	26.45	0.1	0.1	0.1	30.71	3.1	0.1	6.4	0.5	36.27
6.7	0	20.16	0.1	0.1	0.1	0.1	63.55	0	0.1	0.1	1.44	0.4	0.2	9.07	13.3	83.18
10.4	0	11.7	0.1	0.1	0.6	1.4	45.45	0.1	1.2	0.9	15.82	0.1	2	8.9	8.88	69.01
4.1	0.1	38.45	0	0.1	38.17	1.6	28.11	20.38	0	0	2.3	0.3	0.1	5.3	0.9	15.4
5.5	0.1	14.1	0.1	4.4	39.19	0.2	16.02	28.67	4.27	3.96	2	0.1	0.1	0.3	2.1	10.12
3.71	9.17	5.3	0.8	2.65	3.7	0.1	13.5	37.71	3.92	3.7	10.45	0.2	0.1	0.4	2.84	11.49
10	10.39	29.92	11	0.1	5	0.1	24.2	6.5	9.8	10.12	14.49	0.1	0.1	22.51	0.3	15.6
18.21	0	55.8	0	0.2	11.8	0.1	55.83	2.7	0	0	8.39	0.4	0.1	22.8	1.2	24.06
14.3	0	19.7	0	0.1	18	0.6	12.27	9.31	0	0	75.13	0.3	0.6	80.52	6.08	8.9
6.5	0.1	57.16	0.3	0.1	12.4	0.1	0.7	3.8	0	0	37.26	0.1	0.1	67.26	18.1	1.7
3.8	0.1	86.27	0	7.1	17.56	0.1	0.1	9.3	0	0	19.52	0.1	1	35.77	11.8	4.09
13.08	0.1	14.99	0	0.4	8.7	0.2	0.1	3.9	0	0	24.78	4.81	22.06	8.45	10.03	2.7
14.3	1	9.32	0	7.5	0.1	0.49	0.1	7.6	2.8	2.3	7.4	33.95	22.9	4.4	32.34	0.1
8.6	21.67	0.6	1.8	2	0.1	0.1	0.1	0.3	1.09	0.8	0.3	30.19	24	2	8.3	0.1
6.9	5.54	0.7	0	0.4	2.2	11.07	0.3	0.9	0.1	0.1	1.8	8.19	33.99	0.4	31.97	0.2
10	3.1	0.1	6.29	0.4	18.13	0.1	0.1	0.1	1.2	0.9	0.3	8.1	0.1	0.1	2.8	0.1
9.38	18.03	0.1	42.85	7.1	11.33	1.1	0.3	0.1	21.52	23.43	12.39	4.51	0.6	0.1	2.4	2.1
10.1	0.1	14.2	0.2	0.1	23.47	0.1	6.5	5.4	1.4	1	8.6	1	0.1	12.31	0.1	7.44
6.6	0.1	29.42	0.1	0.1	2.11	0.1	20.79	3.9	0	0	0.1	1.4	0.1	0.1	0.1	32.6
5.6	2.9	0	3.9	1.9	25.88	0.1	25.03	2.9	0.1	0.1	0.2	1.8	0.6	0.1	0.1	39.93
10.55	0.4	0.1	0.1	13.66	22.83	31.37	25.27	0.4	0.1	0.1	11.94	16.38	3.6	5.8	11.52	45.73
0.5	0.5	5.4	0.9	2.7	56.53	1.6	12.6	5.3	9.4	9.8	0.1	8.6	0.1	5.2	3.1	17.13
2.2	8.3	2	20.22	17.85	9	4	13.5	3.2	15.79	18.09	5.7	17.61	1.9	7.3	0.1	8.3
2.5	3.4	9.2	0.1	6.68	2.3	1.1	2.2	1.8	6.5	6.2	0.1	3.5	0.1	1.9	0.2	7.4
0.9	8.56	8	39.88	0.1	4	0.37	6	1.99	55.12	59.28	0.1	4.9	0.3	0.1	0.1	9.39
0.1	0.1	3.8	0.2	0.1	26.32	0.65	31.65	16.6	0.9	0.7	2.6	0.6	0.1	0.1	0.1	16.15
0.3	0	0.7	0	0.9	74.27	0.3	65.43	0.1	0	0	0.1	5.4	0.7	1.4	3.38	22
0.1	0.1	0.1	0.1	0.1	25.4	0.7	55.58	4.4	0.1	0.1	12.05	5	0.6	2	0.3	39.93
0.4	0.1	5.6	0	0.1	17.1	0.1	31.04	4.3	0.2	0.1	11.7	0.4	0.1	0.8	0.1	35.89
0.5	0.1	0.1	1.5	0.1	35.72	0.1	26.28	4.5	0.1	0.1	2.6	0.1	0.1	7.3	0.1	11.53
0.1	0.1	31.97	0.5	0.1	34.41	0.1	16.6	0.1	0.1	0.1	3.9	0.2	0.1	19.86	0.1	6.6
1.3	0.1	3.7	0.4	0.1	18.7	8.75	7.2	0.7	0.1	0.1	4.7	4.9	0.1	6.7	0.1	9.82
5	0.1	4.4	0.1	0.1	1.2	6.4	12.7	0.1	2.04	1.6	12.9	1.1	0.1	1.1	0.1	5.84
0.9	0.1	0.1	0.9	0.1	0.1	0.1	20.63	0.1	1.6	1.3	18.3	0.1	0.1	0.2	0.1	8.55
1.3	0.1	1.8	0	0.1	0.1	0.1	43.57	0.1	0	0	19.4	0.1	0.1	15.7	0.1	20.58
2.5	0.1	4.2	0.2	5.8	8.9	0.1	7.75	0.1	0.2	0.2	4.2	3.2	0.1	9.8	0.1	26.29
11.3	4.84	0.1	1.3	4	8.3	0.1	0.1	16.16	2.83	2.3	0.3	6.9	0.1	0.1	0.1	0.1
21.91	8.3	0.1	0.4	0.7	1.3	14.31	0.2	2.7	6.2	6	0.1	0.8	0.1	0.1	12.54	0.1
11.45	3.5	0	0.1	0.5	2.4	6.85	0.8	0.1	0.1	0.1	0.1	0.3	1	0.6	26.82	0.1
30.41	3	0	0.1	7	0.4	0.1	0.1	0.1	6.8	6.45	0.1	5.7	75.39	0.1	7.42	0.1
19.41	0.1	0	0.1	0.1	0.1	0.1	0.1	0	2.04	1.6	1.6	109.44	99.03	0.1	56.58	0.1
13.66	0.1	6	0	0.1	0.27	27.94	0.1	0.1	0.1	0.1	3	48.38	3.04	1.6	0.3	0.1
1.5	15.09	0.1	0.2	19.09	2.1	1.7	0.1	7.5	0.8	0.6	8.01	6.9	2.6	3.7	3.63	0.1
0.1	5.54	0.1	0	4	17.1	1.1	1.7	12.01	8.5	8.3	0.1	0.1	1	0.1	21.48	0.1
3.1	11.54	0.1	0	12.23	5.8	1.37	0.1	0.1	0.5	0.4	0.1	15.86	12.22	0.1	11.8	0.4
8.8	0.2	0	0.1	8.9	13.31	5.48	7	0.1	0.2	0.2	0.1	16.24	6.9	0.1	36.56	5
12.4	5.11	0	0.7	5.4	32.24	6.7	1.4	0	0.1	0.1	0.1	13.34	0.1	0.1	2.1	5.1
8.6	8.09	0.1	3.48	8	37.28	6	0.1	0.1	17.12	19.32	0.1	10.8	0.64	0.1	10.52	1.5
21.35	3.9	0.1	19.62	15.36	11.1	12.1	0.1	0	24.23	25.74	0.6	17.47	8.2	0.1	8.6	0.1
6.25	4.28	0	0.4	8.3	1	7.3	0.1	0.1	0.6	0.4	0.3	18.1	14.9	0.1	30.7	0.2
10.7	4.32	0.1	0.5	7.2	0.7	0.1	0.2	0.1	14.63	16.61	0.1	1	6.81	0.1	9.1	4.2
14.9	0.1	0.1	0	7.89	22.98	0.1	3.6	0	2.3	1.8	0.1	10.1	15.6	0.1	8.2	13.73
19.94	0.1	0.9	0	93.77	34.95	0.1	3.9	0.1	15.37	17.7	0.1	0.5	0.4	0.3	10.88	0.49
4.4	30.03	0.1	0	63.91	2.1	18.34	10	0.1	0	0	0.1	2.82	4.6	0.5	9.5	14.6
0.1	8.91	2.88	0.1	6.73	2.5	19.4	21.85	1.7	3.8	3.4	1.7	3.8	0.1	6.96	2.4	24.57
0.1	16.29	30.6	0.1	2.8	9.4	0.1	37.48	8.91	14.84	16.94	2	1.9	0.1	8.31	0.1	21.52
0.1	0.1	15.4	2.6	0.1	2.3	0.1	44.97	9.11	20.17	22.43	13.7	0.1	0.1	2.6	0.9	38.87
1.7	0	12.4	0	0.3	21.89	3.1	33.9	13.18	0.1	0.1	15.7	0.1	0.5	1.3	0.4	35.17
0.3	0.5	6.67	1.9	3.3	56.95	0.6	8.5	5.7	10.2	10.8	1.1	0.1	0.1	5.3	0.1	18.91
0.1	27.04	1.7	0	36.23	8.8	0.7	1.2	8.5	0	0	2.7	5.51	0.1	0.1	0.1	2.08
0.5	31.46	0.1	0	15.8	0.1	6.95	1	0.1	0.1	0.1	9.6	2.2	0.1	5.6	0.1	2.8
0.1	1	1.9	0.1	0.1	0.1	0.2	10	0.1	6.9	6.8	25.22	0.1	0.1	0.1	0.1	0.1
0.1	0.1	4.4	0.1	0.1	0.1	0.1	16.69	0.1	0.1	0.1	4	0.1	0.1	40.07	0.1	3
0.1	0	27.07	0	0.1	0.1	0.1	10.1	0.1	0	0	35.1	0.1	0	21.2	0.1	0.4
0.1	0	51.52	0	0.1	0.1	0.1	9.7	0.1	0	0	24.52	0.1	0	30.33	0.1	0.8
0.1	0	14.83	0	0.1	0	0.1	23.76	0	0	0	29.18	0.1	0	13.4	0	1.8
0.1	0	2	0	0	0.1	0.1	18.39	0	0	0	17.92	0.1	0	10.4	0.1	0.3
0.1	0	0	0	0	0.1	0.1	19.6	0	0	0	15.67	0.1	0	1.8	0.1	0.2
0.1	0	0.1	0	0	0	0.1	7.23	0	0	0	4.9	0.1	0	0.1	0.1	0.7
0.1	0	0.1	0	0.1	0.1	0.1	22.24	0.1	0	0	0.1	0.1	0.1	1	0.1	9.6
0.1	0	0.1	0	0.1	0.1	0.1	6.1	6.3	0	0	7.6	0.1	0.1	0	0.1	23.56
0.1	0	0	0	0	1.4	0.1	7.19	5.24	0	0	2.99	0.1	0.1	0.1	0.1	8.2
0.1	0	0	0	0	0.5	0.1	8.4	2.4	0	0	1	0.1	0.1	0	0.1	13.68
0.1	0.1	0.1	0	0.4	9.7	0.1	0.1	2.8	0	0	0.5	0.1	0.1	1.7	0.1	1.4
0.1	0.1	0.8	0	4.6	6.2	0.1	0.1	0.4	0	0	2.38	4.8	0.1	0.5	0.1	0
0.1	0.7	0.1	0	21.1	0.2	0.1	0.9	0.1	0	0	12.48	24.96	1.2	5.5	0.1	0.1
0.1	0.2	2.3	2.54	6.9	1.2	0.1	0.1	1	0	0	5.3	10.8	0.1	0.1	7.2	0.1
1.8	0.9	5.1	9.57	0.2	0.2	0.1	0.1	8.21	0.1	0.1	9.68	1.6	0.1	2.4	0.1	0.3
0.5	0.2	3.8	15.59	0.9	0.1	0.1	12.4	6.78	1.9	1.46	4.2	0.1	2.6	0.1	0.9	0.1
2.4	2.1	10.53	0.1	0.2	0.2	0	7.8	3	0.1	0.1	2.4	0.8	1.91	0.1	0.1	0.5
9.07	0.8	12.29	0	0.5	11.76	0.1	33.21	1.57	0	0	4.2	0.2	9.42	0.1	0.1	12.7
7.3	0.4	0.1	0	0.4	13.92	0.1	9.6	0.1	0	0	0	18.43	60.82	0.1	0.2	12.59
44.32	0.1	0.1	0	20.49	5.7	0.1	2.8	4.32	0	0	0	29.95	41.28	0	0.1	0.1
39.73	0.1	0	0	4.6	0.1	0.1	7	0.1	0.1	0.1	0.1	73.08	14	0.1	44.13	2.2
10.15	0.1	0	0	0.1	0.5	8.79	2.3	0.1	0	0	0.1	0.1	18.18	0.1	18.04	2.6
2.4	0.1	0	0	0.7	0.1	0.1	3.3	0	0	0	0.1	0.4	2.5	0.1	0.1	0.7
23.12	0.1	0	0	0.1	0.1	0.1	7.1	0.1	0	0	0.3	1.62	0.3	0.1	0.8	9.5
1.5	0	0.1	0	4.3	1.5	0	13.72	0	0	0	0.7	2.67	3.91	0.1	5.3	38.92
1	0	23.23	0	0.1	54.88	0.1	2.5	7.5	0	0	0.3	0.1	1.1	0.9	0.1	12.62
0.1	0.1	21	0	0.1	116.83	0.1	0.2	33.78	0	0	0.1	0.1	0.1	0.3	0.1	1.3
0.1	0.1	86.54	0	1.1	5.2	0.1	2.3	75.49	0.1	0.1	1.4	0.1	0.1	9.61	0.1	2.5
0.1	0	84.38	0	0	0.1	0.1	1.3	32.48	0	0	0.7	0.1	0.1	8.97	0.1	2.6
0.1	0	28.74	0	0	6	0.1	0	15.97	0	0	0.1	0	0.1	0.1	0.1	0.3
0.1	0	9.3	0	0.1	23.6	0.1	0.1	6	0	0	0.1	0	0.1	1.8	0.1	0.1
0.1	0	2.6	0	0.1	11.16	0	0.1	0.1	0	0	0.1	0.1	2.8	1.9	0.1	0.1
0.1	0	0	0	0.1	2.2	0	1.4	0	0	0	0.1	2.1	51.01	0.1	0.1	0
0.1	0	0	0	0.1	0.3	0	1.7	0	0	0	1.9	2.3	44.4	6	1.9	0.1
0.1	0	0.1	0	0.1	0.5	0	11.3	0	0	0	0.5	22.71	40.8	0.1	3.2	5.1
0.1	0.1	0.3	0	0.1	5.4	0	9.7	0.1	0	0	0.1	38.57	8.4	0.1	0.1	5.2
0.1	0.1	12.4	0.1	4.45	2.6	0.1	14.63	0.8	3.1	2.6	0.1	23.57	0.1	3.7	0.9	3.3
0.1	0.1	10.9	0.1	7.5	0.1	0	4.5	0.6	3.55	3.12	0.1	11.61	0.2	20.19	0.1	5.99
0.1	0.1	5.1	0	0.1	1.7	0	2.4	0.1	0	0	0	6	0.3	0.8	0.1	0.1
0.1	0.1	0.1	0	0.1	2.5	0	1.2	0.1	0.6	0.4	0	1.8	0.9	0	0.1	0.4
29.44	0	0	0	0	0.4	0	0.1	0	0	0	0	0.4	0.84	0	10.01	0.2
11.28	0.1	0	0	0	0.1	0	1.65	0	0	0	0	0.1	0.3	0	0.7	0.99
0.1	0.1	0.1	0	0.1	0.2	0	0.3	0	0	0	0.1	0.49	0.6	0.1	0.1	0
0.1	0.1	0	0	0.1	5.2	0	0.1	0	0	0	0.1	1.7	0.1	0	0.1	0.1
0.1	0.1	0	0	0.1	0.2	0	0.1	0	0	0	0.1	2.9	0.1	0	2.5	0.1
0.1	0	0	0	0	0.1	0	0.1	0	0	0	0	0.1	0.1	0	0.1	0.1
3.5	0	0	0	0	0.1	0	4.3	0	0	0	0	0	0.1	0	0.1	0.5
2.3	0	0	0	0	0	0	1.48	0	0	0	0	0	0.1	0	0	1.7
0.9	0	0	0	0	0	0	0.1	0	0	0	0.1	0	0	0	0.1	0.1
0.1	0	0	0	0	0	0	11.5	0	0	0	0.1	0	0	0	0.1	0.1
0.1	0	0.1	0	0	0	0	24.3	0	0	0	7.1	0	0	10.85	0	25.66
0.1	0	4.1	0	0	0.1	0	13.59	0	0	0	15.41	0	0	19.18	0.1	51.77
0.1	0	26.82	0	0	0.1	0	14.2	0	0	0	6.2	0	0	8.4	0.1	40.17
0.1	0	5.6	0	0	0.1	0	8.5	0	0	0	1.9	0.1	0.1	21.29	0	11.3
0.1	0	10.14	0.1	0	0	0	5.2	0	0	0	4.24	0	0	14.5	0.1	9
0.1	0	0.1	0	0	0.1	0	1.9	0	0	0	0.2	0	0	10.13	0.1	2.4
0.1	0	0	0	0	0	0	0.1	0	0	0	0	0	0	0	0	1.5
0	0	0	0	0	0	0	0.1	0	0	0	0	0	0	0	0.1	0
0.1	0	0	0	0	0	0	0.1	0	0	0	0	0	0	0	0	0.1
0	0	0.1	0	0	0.1	0	8.94	0	0	0	0.1	0	0	0.1	0	1.65
0.1	0	8.1	0	0	1.7	0	18.4	0.3	0	0	5.1	0	0	6.2	0	8.9
0.1	0	14.72	0	0	1.1	0	24.31	6.2	0	0	22	0	0	13.55	0	9.59
0.1	0	0.7	0	0	0.1	0	22.24	0	0	0	40.67	0	0	10.43	0.1	3.5
0	0	0	0	0	0	0	0.9	0	0	0	1.78	0	0	0	0.1	0
0.1	0	0	0	0	0	0	0.1	0	0	0	0	0	0	0	0	0
0.1	0	0	0	0	0	0	0.1	0	0	0	0.1	0	0	0	0	0
1.2	0	0	0	0	0	0	0	0	0	0	0.1	0	0	0	0	0
0.1	0	0	0	0	0	0	0	0	0	0	0.1	0	0	0	0	0
0.1	0	0	0	0	0	0	0	0	0	0	0	0	0	0	0	0
0	0	0	0	0	0	0	0	0	0	0	0	0	0	0	0	0
0.1	0	0	0	0	0.1	0	0	0	0	0	0	0	0	0	0	0
0.6	0	0	0	0	0	0	0	0	0	0	0	0	0.1	0	0.1	0
0.1	0	0	0	0	0.1	0	0	0	0	0	0	0.1	0.1	0	0.1	0
2.9	0	0	0	0	0	0.1	0	0	0	0	0	0.1	0.1	0	0.1	0
3.9	0	0	0	0	0	9.6	0	0	0	0	0	0.1	0.1	0	0.5	0
2.3	0	0	0	0	0.1	24.11	0	0	0	0	0	22.7	0.1	0	17.97	0
2.2	0	0	0	0.56	0.1	35.13	0	0	0	0	0	18.66	0.1	0	0.1	0
0.1	0	0	0	2	0.1	13.53	0	0	0	0	0	12.8	0.1	0	0.1	0
0.1	0	0	0	0.2	0.1	0	0	0	0	0	0	1.1	0.1	0	0.1	0
0.1	0	0	0	0.1	0.1	0	0	0	0	0	0	0.1	0.1	0	0.1	0
0.1	0.1	0	0	0	0.1	0.1	0	0	0	0	0	0.1	0	0	0.1	0
0.1	11.21	0	3	0.1	0.1	3.47	0	0	0	0	0	0	0	0	0.1	0
0.1	0.1	0	0.1	0	0	0.1	0	0.1	0	0	0	0	0	0	0.1	0
0.1	0.1	0	0	0	0	0.1	0	0	0	0	0	0.1	0	0	0.1	0
0.1	0.1	0	17.15	0	0	0.1	0	0	19.45	21.96	0	0.1	0	0	0.1	0
0	0.1	0	1.22	0.1	0	0	0	0	0.1	0.1	0	0.1	0	0	0.1	0
0.1	0.1	0	5.3	0.1	0	0	0	0	6.5	6.12	0	0.1	0	0	0.1	0
0.1	0.1	0.1	0	0.1	0.1	0	0	0.3	0.1	0.1	0	0	0.1	0	0.1	0
0.1	0	1.1	0.1	0	0.1	0	0	1.5	3.9	3.6	0.1	0	0.2	0.1	0.1	0.1
0.1	0	1.4	0	0	0.1	0	0	0.1	0	0	0.1	0	0.1	0.7	0.1	0.2
0.1	0	0	0	0	0	0	0	0	0	0	0	0	0.1	0	0.1	0.1
0.1	0	0	0	0	0	0	0	0	0	0	0	0	0.1	0	0.1	0
0.1	0	0	0	0	0	0	0	0	0	0	0	0.1	0.1	0	0.1	0
0.2	0	0	0	0	0	0	0	0	0	0	0	0.1	0	0	0.1	0
0.1	0	0	0	0	0	0	0	0	0	0	0	0	0	0	0.1	0
0	0	0	0	0	0	0.1	0	0	0	0	0	0	0	0	0	0
0	0	0.4	0	0	0	0.1	0.1	0	0	0	0.1	0	0	0	0	0
0	0	0.3	0	0	1.3	0	0	0.1	0	0	0	0	0	0.1	0	0
0	0	0.1	0	0	0.2	0	0	0	0	0	0	0	0.1	0	0	0
0	0	0	0	0.1	0.1	0	0	0	0	0	0	0.1	0.1	0	0	0
0	0	0	0	0.1	0	0	0	0	0	0	0	0.1	0.1	0.1	0.1	0.1
0	0	0	0	0	0	0	0	0	0	0	0	0	0.1	0.1	0	0.1
0.1	0	0	0	0	0	0	0	0	0	0	0	0.1	0.1	0	0.1	0
0	0	0	0	0.1	0.1	0	0.1	0	0	0	0	0.1	0.1	0	0.1	0
0	0	0	0	0	0	0	0	0	0	0	0	0.1	0.1	0	0.1	0
0.1	0	0	0	0	0	0.1	0	0	0	0	0	0.1	0.1	0	0.1	0.1
0.1	0	0	0	0	0	0.1	0	0	0	0	0	0	0	0	0.1	0
0.1	0	0	0	0	0	0.1	0	0	0	0	0	0.1	0	0	0.1	0
0.1	0	0	0.3	0	0.1	0	0	0	0.1	0.1	0	0.1	0.1	0	0.1	0
0	0.1	0	0	0.1	0	0	0	0	0	0	0	0.1	0.1	0	0.1	0
0.1	0.1	0.1	0.1	0.2	0	0	0	0.3	0.1	0.1	0	0.1	0.5	0	0.1	0.1
0.1	0.1	4.99	0	0	0.1	0	0	3.31	0	0	0.1	0.1	0.1	0.2	0.1	0.1
0.1	0.1	0	0	0.1	0.3	0	0	0	0.1	0.1	0.1	0.1	2	0.1	0.1	0.1
0.1	0.4	0.1	0.1	1.2	0.6	0	0.1	0	0.1	0.1	0.1	0.1	6.4	0.6	0.1	9.66
0.1	0.4	16.61	14.67	0.1	14.42	0.1	0	2.4	0.9	0.7	0.1	0.1	0.2	5.3	0.1	1.3
0.1	0.1	5.38	0.1	0.1	0.1	0	0.1	0.1	0.1	0.1	0.1	0	0.6	5.48	0	0.9
0.1	0.1	0.1	0	0	0.1	0	0.1	0	0.1	0.1	0.1	0.1	1	0.1	0.1	0.1
0	0.1	0	0	0.1	0.1	0	0.1	0	0	0	0	0	0.1	0	0.1	0.1
0	0	0	0	0	0	0	0.1	0	0	0	0	0	0	0	0.1	0
0	0.1	0	0	0	0	0	0	0	0	0	0	0.1	0	0	0.1	0
0	0.1	0	0.1	0.1	0	0	0	0.1	0	0	0	0.1	0.1	0	0.1	0
0.1	0	1.55	0	0	0.1	0	0	0.7	0	0	0	0.1	0.1	0.1	0	0.1
0.1	0	0	0	0	0	0	3.9	0	0	0	0.1	0	0.1	0.1	0	1.2
0.1	0	0	0	0	0	0	0	0	0	0	0	0	0	0	0	0
0	0	0	0.1	0	0	0	0	0	0	0	0	0	0	0	0	0
0	0	0	0	0	0	0	0	0	0	0	0	0	0	0	0	0
0	0	0	0	0	0	0	0	0	0	0	0	0	0	0	0	0
0	0	0	0	0	0	0	0	0	0	0	0	0	0	0	0	0
0.1	0	0	0	0	0	0	0	0	0	0	0	0	0	0	0.1	0
0	0	0	0	0	0	0	0	0	0	0	0	0	0	0	0	0
0	0	0	0	0	0	0	0	0	0	0	0	0	0	0	0	0
0	0	0	0	0	0	0	0	0	0	0	0	0	0	0	0	0
0	0	0	0.1	0	0	0	0	0	0.1	0.1	0	0	0	0	0	0
0	0	0	0	0	0	0	0	0	0	0	0	0	0	0	0	0
0	0	0	0	0	0	0	0	0	0	0	0	0	0	0	0	0
0	0	0	0	0	0	0	0	0	0	0	0	0	0	0	0	0
0	0	0	0	0	0	0	0	0	0	0	0	0	0	0	0	0
0	0	0	0	0	0	0	0	0	0	0	0	0	0	0	0	0
0.1	0	0	0	0	0	0	0	0	0	0	0	0	0	0	0	0
0	0	0	0	0	0	0	0	0	0	0	0	0	0	0	0	0
0	0	0	0	0	0	0	0	0	0	0	0	0	0	0	0	0
0	0	0	0	0	0	0	0	0	0	0	0	0	0	0	0	0
0	0	0	0	0	0	0	0	0	0	0	0	0	0	0	0	0
0.1	0	0	0	0	0	0	0	0	0	0	0	0	0	0	0	0
0	0	0	0	0	0	0	0	0	0	0	0	0	0	0	0	0
0	0	0	0	0	0	0	0	0	0	0	0	0	0	0	0	0
0	0	0	0	0	0	0	0	0	0	0	0	0	0	0	0	0
0	0	0	0	0	0	0	0	0	0	0	0	0	0	0	0	0
0	0	0	0	0	0	0	0	0	0	0	0	0	0	0	0	0
0	0	0	0	0	0	0	0	0	0	0	0	0	0	0	0	0
0	0	0	0	0	0	0	0	0	0	0	0	0	0	0	0	0
0	0	0	0	0	0	0	0	0	0.1	0.1	0	0	0	0	0	0
0	0	0	0	0	0	0	0	0	0	0	0	0	0	0	0	0
0	0	0	0	0	0	0	0	0	0	0	0	0	0	0	0	0
0	0	0	0	0	0	0	0	0	0	0	0	0	0	0	0	0
0	0	0	0	0	0	0	0	0	0	0	0	0	0	0	0	0
0	0	0	0	0	0	0	0	0	0	0	0	0	0	0	0	0
0	0	0	0	0	0	0	0	0	0	0	0	0	0.1	0	0.1	0
0.1	0	0.1	0	0	0	0	0	0	0	0	0	0	0	0	0.1	0
0.1	0	0	0	0	0	0	0	0	0	0	0	0	0	0	0.1	0
0	0	0	0	0	0	0	0	0	0	0	0	0	0	0	0	0
0	0	0	0	0	0	0	0	0	0	0	0	0	0	0	0	0
0	0	0	0	0	0	0	0	0	0	0	0	0	0	0	0	0
0	0.1	0	2.1	0	0	0	0	0	0.1	0.1	0	0	0	0	0	0
0	0.1	0.1	0.1	0	0.1	0	0	0.1	0	0	0	0	0	0	0	0
0.1	0	0	0	0	0	0	0	0	0	0	0.1	0	0	0.1	0	0.1
0	0.1	0	0.7	0	0	0	0	0	1.3	1	0	0	0	0	0	0
0	0	0.4	0	0	0	0	0	0.1	0	0	0	0	0.1	0	0	0.1
0	0	0	0	0	0	0	0	0	0	0	0	0	0	0	0	0
0	0	0	0.1	0	0	0	0	0	0.1	0.1	0	0	0	0	0	0
0	0	0	1.3	0	0	0	0	0	0.1	0.1	0	0	0.1	0	0.1	0
0.1	0	0	0	0	0	0	0	0	0	0	0	0	0.1	0	0	0
0	0	0.1	0	0	0.1	0	0.1	0	0	0	0.1	0	0	0.8	0	0.4
0	0	0.1	0	0	0	0	0.1	0	0	0	0.1	0	0	0.1	0	0.6
0	0	0	0	0	0	0	0.1	0	0	0	0.1	0	0	0	0	0.1
0	0	0	0	0	0	0	0.1	0	0	0	0.1	0	0	0	0	0.1
0	0	0	0	0	0	0	0	0	0.1	0.1	0	0	0	0	0	0
0	0	0	0	0	0	0	0	0	0	0	0	0	0	0	0	0
0	0	0	0.1	0	0	0	0	0	0.1	0.1	0	0	0	0	0	0
0	0	0	0	0	0	0	0	0	0.1	0.1	0	0	0	0	0	0
0	0	0	0	0	0.1	0	0	0	0	0	0	0	0.1	0	0.1	0
0.1	0	0	0	0	0.1	0	0	0.1	0	0	0	0	0.1	0	0.1	0
0.1	0	0	0	0	0	0	0	0	0	0	0	0	0	0	0.1	0
0.2	0	0	0	0.1	0	4.6	0	0	0	0	0	0.1	0	0	0.9	0
0.1	0.1	0	13	1.56	0	4.61	0	0	2.5	2	0	3.7	0.4	0	0.1	0
0.1	0	0	0.1	0.1	0.3	0	0	0.1	0.1	0.1	0	0.1	0.1	0	0.1	0
0.1	0	0.1	0.1	0	0.1	0	0	0.1	0.1	0.1	0	0	0.1	0	0.1	0
0	0	0	0	0	0	0	0	0	0	0	0	0	0	0	0.1	0.1
0	0	0	0	0	0	0	0	0	0.1	0.1	0	0	0	0	0.1	0.1
0.1	0	0	0	0	0	0	0	0	0.1	0.1	0	0	0	0	0	0
0.1	0	0	0.1	0	0	0	0	0	0	0	0	0	0	0	0	0
0	0	0	0	0	0	0	0	0	0	0	0	0	0	0	0	0
0	0	0	0	0	0	0	0	0	0	0	0	0	0	0	0.1	0
0	0	0	0	0	0	0	0	0	0	0	0	0	0	0	0.1	0
0.1	0	0	0	0.1	0	0.1	0	0	0	0	0	0	0	0	0.1	0
0	0.1	0	0.1	0.1	0	0.1	0	0	0	0	0	0.1	0	0	0.1	0
0	0.1	0	0.6	3.8	0.1	0	0	0.1	0.1	0.1	0	0.1	0	0	0.1	0
0	0.1	0.9	0	0	0.1	0	0	1	0	0	0.1	0	0.1	0.4	0	0
0.1	0	0	0	0	0.1	0	0.4	0	0	0	0.1	0	0	0	0.1	0
0.1	0	0	0	0	0	0	0.4	0	0	0	6.1	0	0.1	0.1	0.1	0.1
0.1	0	0	0	0	0	0	0.6	0	0	0	9.2	0	0	0.1	0	0.1
0.1	0	0	0	0	0.1	0	0.1	0	0	0	6.2	0	0.1	0.1	0	0.2
0.1	0	0	0	0	0.1	0	1.9	0	0	0	2	0	0.1	4.36	0.1	3.2
0.2	0.1	0	0	0	0.1	0	5.75	0	0	0	4.3	0	0.1	0.1	0.1	4.7
0.2	0.1	0	0.1	0.1	0.1	0	3.2	0	0.1	0.1	2.5	0.1	0.1	2.8	0.1	0.3
0.1	0.1	0.5	6.2	0	0.4	0	0.1	0.1	1.6	1.2	7.1	0.1	0.1	0.1	0.1	2
0.2	0.1	0.3	0.1	0.1	0.1	0	1.4	0.1	0.1	0.1	7.8	0	0.1	0.1	0.1	6.5
0.1	0	0	1.15	0	0.1	0	0.1	0	3	2.5	0	0	0.1	0	0.1	0
0.1	0	0.1	0.4	0	0	0	0	0	1.8	1.4	0	0	0.1	0	0	0
0.1	0	0.1	0	0	0	0	16.61	0	0	0	0.1	0	0	0.43	0	0.9
0.1	0	0	0.1	0	0	0	4.5	0	0	0	1.8	0	0	0	0	0
0	0	0	0	0	0	0	0.1	0	0.1	0.1	0	0	0	0	0	0
0	0	0	0	0	0	0	0.6	0	0	0	0.1	0	0	0	0	0
0	0	0	0	0	0	0	0	0	0	0	0.7	0	0	0	0	0
0.1	0	0	0	0	0	0	0	0	0	0	0	0	0	0	0	0
0.1	0	0	0	0	0	0	0	0	0	0	0.1	0.1	0	0	0	0
0.1	0.1	0	0	0.1	0	0	0	0.1	0	0	0.1	0	0	0	0	0
0.7	0	1	0	0	0.1	5.48	0	0.1	0	0	0.1	0	0.1	0.1	0.1	0
0.6	0.1	0.7	0.1	0.1	0.3	0.1	0	0.4	0.1	0.1	0.1	0.1	0.1	0.1	0.1	0.1
0.1	0.1	7.19	0	0.1	3.8	0	0	0.1	0	0	2.1	0.1	0.1	2.7	0.1	6.3
0.1	0	2.79	0.1	0.1	0.1	0	13.95	0.1	0.1	0.1	40.42	0	0.1	13	0.1	9.14
0.1	0	0.3	0	0	0	0	4.83	0.1	0	0	3.1	0	0	0.1	0	5.79
0	0.1	0	0.2	0.1	0.1	0	5.8	0	0.1	0.1	0.3	0	0.1	0	0	0
0	0.1	5.8	1.6	0	0.1	0	0.1	1.8	0.9	0.7	0.4	0	0.1	0	0	3.3
0	0	1.62	2.1	0	0.1	0	0.7	0.1	2.4	1.88	0.1	0	0	1.7	0	2
0.1	0	0.3	0	0	0	0	0	0	0	0	0.1	0	0.1	0.1	0	2.3
0.1	0	0	0	0	0	0	0	0	0	0	0	0	0.31	0	0.1	0.1
0.1	0.1	0	2.4	0.1	0	0	0	0	0.9	0.7	0	0	0.1	0	0.1	0
0.1	0.1	0.1	0.6	0	0.1	0	0.1	0.1	2.83	2.3	0	0	0	0	0	0.1
0	0.1	0.1	0.1	0	0.1	0	6.93	0.1	0.1	0.1	0.1	0	0.1	1.7	0	0.5
0	0	0.2	0.1	0	0.1	0	18.25	0.1	0	0	0.1	0	0	14.5	0	1.5
0	0	2.5	0	0	0.1	0	0.1	0	0	0	0.1	0	0	0.1	0	0.1
0.1	0	0	0	0	0	0	0	0	0	0	0.1	0	0	0	0	0
0.1	0	0	0	0	0	0	0	0	0	0	0.1	0	0	0	0	0
0.1	0	0	0	0	0	0	0	0	0	0	0.1	0	0	0	0	0
0	0	0	0	0	0	0	0	0	0	0	0.1	0	0	0	0	0
0	0	0	0	0	0	0	0	0	0	0	0.1	0	0	0	0	0.1
0	0	0	0	0	0	0	0	0	0	0	0.5	0	0	0	0	0
0.1	0	0	0	0	0	0	0	0	0	0	4.2	0	0	0.1	0	0.1
0.1	0	0	0	0	0	0	0	0	0	0	5	0	0	0.1	0	0
0.1	0	0	0	0	0	0	0	0	0	0	3.5	0	0	0	0	0
0.1	0	0	0	0	0	0	0	0	0	0	0.6	0	0	0	0	0
0	0	0.1	0	0	0	0	0	0	0	0	0.1	0	0	0	0	0
0.1	0	0.1	0	0	0	0	0	0	0	0	0.1	0	0	0	0	0.4
0.1	0.1	0.1	0	0.1	0	0	0	0.1	0	0	0.1	0	0.1	0.1	0	0.4
0.6	0.1	0.1	0.1	0.1	0	0	0	0.1	0.1	0.1	0.1	0	0.2	2.7	0.1	0.7
0.1	0	0	0	0	0.1	0	0.1	0.1	0	0	1	0	0.1	4.6	0.1	4
0.1	0	0	0	0	0	0	0	0	0	0	23.65	0	0	8	0	4.6
0.1	0	0	0	0	0	0	5.9	0	0	0	19.49	0	0.1	5.1	0.1	4.2
0.1	0	0	0	0	0	0.1	0.1	0	0	0	14.89	0.1	0	0	0.1	0
0.1	0	0	0	0	0	0.1	0.1	0	0	0	11.3	0	0.1	0	0.1	0
0.1	0.1	0	0	0	0	0.1	0.15	0	0	0	13.49	0	0.1	0	0	0
2.9	0.1	0	0	0.1	0	0	3.3	0	0	0	4.2	0.1	0.1	0	0.1	0
1.3	0.1	0	0	0.1	0	0	2.5	0	0	0	0.1	0.1	0.1	0.1	0.1	0.1
9.5	0.1	0	0	0.1	0.1	0	0	0	0	0	10	0.1	0.1	0	0.5	0.1
1.6	0	0	0	0	0	0	0.1	0	0	0	2	0	4.7	0	0.1	0
0.1	0	0	0.1	0	0	0	0.1	0	0.1	0.1	2.2	0	0.1	0	0.1	0
0.1	0	0	0	0	0	0.1	11.3	0	0	0	5.13	0.1	0.1	1	0.1	0.1
0.1	0.1	0	0.1	0.1	0.1	0.1	6.5	0	0.1	0.1	0.1	0	0.1	1.1	0	0.3
0.1	0.1	0	0.1	0.1	0.1	0	0	0	0.1	0.1	0.1	0	1.3	0.1	0.1	0.1
10.12	0.1	0.1	0	0.1	0.1	0	6	0.1	0	0	0.4	0.1	4.9	0.1	0.1	0.3
3.8	0.1	2.6	0.1	0.1	0.1	0	50.39	0	0.1	0.1	5	0	0.1	4.8	0.1	34.66
0.1	0	20.16	0	0	0	0.1	107.3	0	0	0	42.67	0	0	96.08	0.1	32.26
0.1	0	0.4	0	0	0	0.1	11.3	0	0	0	75.79	0.1	0	59.96	0.1	0.1
0.1	0.1	0	0	0	0.1	0.1	0.1	0	0	0	36.83	0.1	0	0.1	0.1	0
0.1	0	0	0.1	0	0.1	0.1	0.1	0	0	0	20.84	0.1	0	0.1	0.1	0
0.1	0	0	0	0	0	0.1	0	0	0	0	19.4	0	0	0.1	0.1	0
0.1	0	0	0	0	0	0.1	0	0	0	0	2.4	0	0	0.1	0.1	0
0.1	0	0	0	0.1	0.1	0.1	0	0	0.1	0.1	1.7	0	0.1	0	0.1	0.1
0.1	0.1	0	0	0.1	0.1	0.1	0.4	0	0.1	0.1	25.23	0	0	0.1	0.1	0
0.1	0	0	0	0	0.1	0.1	0.1	0	0.1	0.1	8.4	0	0	0.1	0.1	0
0.1	0	0	0.1	0	0	0.1	0.1	0	0.1	0.1	18.71	0.1	0	0.1	0.1	0.1
1.6	0	0	0.1	0	0.1	0.1	0.1	0	8.4	8.2	21.89	0	2.1	0.1	0.1	0.1
0.2	0	0	0.1	0	0.1	2.4	0.2	0	0	0	9.4	0.1	9.53	0.1	0.1	0.3
2.48	1	0	2.95	0.1	2.3	27.76	0	0	5.15	4.7	5.4	0.1	10.3	2.2	5.49	1.3
1.8	0.2	7.5	8.8	0.1	0.7	35.3	0.1	0.1	6.8	6.78	3.99	0.1	0.1	2.8	0.1	2.6
2.4	2.8	0.9	3.7	0.1	3.9	30.43	0.5	0.1	0.1	0.1	0.1	0.1	0.1	0.1	0.1	7.06
6.7	3.8	0.1	0.1	3.9	3.1	0.1	42.4	0.9	0	0	0.1	7.3	0.1	0.1	4.5	22.22
2	0.1	0.1	0	15.5	9.2	0.2	111.17	0	0	0	20.2	5.49	1.6	8	0.1	4.1
2	0.1	0	0	0.1	1.7	0.5	28.73	0	0	0	27.7	0.1	4.4	0.1	0.3	0.74
1.3	0	0	0	0	0.1	0.1	0.1	0	0	0	13.1	0.1	10.5	0	11.6	0
18.18	0	0	0	0	0.1	0.1	0.1	0	0.1	0.1	4.8	0.1	2.6	0	17.72	0
18.3	0	0.1	0	0	0	0.1	0.2	0	0.1	0.1	23.94	0.1	11.85	0	9.61	0.1
0.1	0	0	0	0	0.1	0.1	0	0	0	0	22.8	0.1	5	0.1	0.6	0.1
0.6	0	0	0	0	0	0.1	0.1	0	0	0	7.5	0	0.3	0	0.1	0
0.5	0	0	0	0	0	0.1	0	0	0	0	8.3	0	0	0	0.1	0
3	0	0	0	0	0	0.5	0	0	0	0	29.81	0.1	0	0	0.1	0
0.1	0	0	0.1	0	0	5.08	0	0	0	0	10.87	0.1	0	0.1	0.1	0.1
0.1	0.1	0	0	0	0	3.69	7.1	0	0.1	0.1	7.6	0.1	0.1	0.1	0.1	0.1
2.1	0.1	0	0	0	0.1	1.1	36.29	0	0	0	25.59	0.1	0.1	16.79	0.1	0.6
0.3	0	0	0	0	0.1	1	61.53	0	0.1	0.1	36.66	0.1	0.1	17.36	0.1	6.35
0.5	0	0	0.1	0	0.1	0.4	66.11	0	0	0	6.05	0.1	0.1	8.76	0.1	13.1
14.44	0	6.6	0	0	0.1	1.2	63.99	0.1	0.1	0.1	8.4	0.1	0.1	0.4	6.9	54.94
17.35	0	1.7	0.1	0	3.6	0.5	30.42	0.6	0.1	0.1	0.2	0.1	0.1	0.1	0.2	54.39
12.19	0.1	0	0	0.1	24.31	0.8	24.23	1.45	0	0	1.4	0.1	3.5	2.9	1.82	8.6
9.82	0.1	0.28	0	0.2	76.16	0.1	16.3	2.2	0	0	14.44	0.4	14.18	5.1	0.1	7.6
3.5	0	0.1	0	4.1	106.02	0.1	6.7	0.1	0	0	11.7	0.2	7.4	9.95	0.1	7.6
3.1	1.3	2.4	0	20.13	60.81	0.1	17.81	0.1	0	0	4.5	0.1	0.1	13.2	0.1	14.95
4.53	0.1	6.3	0	14.58	52.35	0.1	20.5	1.3	0.1	0.1	22	7.3	0.1	38.31	0.7	12.51
1.2	0.1	4.9	0	15.47	76.97	0.1	22.68	10.9	0.1	0.1	4	0.81	0.31	23.78	0.1	6.5
0.7	4.18	4.4	0.1	32.3	28.32	2.34	9.69	5.4	0.1	0.1	0.5	3.1	0.2	2.1	0.1	8.1
0.8	4.61	2.4	0.1	24.65	21.86	15.47	19.99	0.1	0.1	0.1	0.1	7.3	0.1	2.9	0.1	18.39
3.8	4.4	0.1	8.47	19.76	20.59	65.14	43.65	0.1	25.59	27.63	0.1	10	0.1	0.5	1.7	26.05
2.3	0.1	0	0.1	32.6	18.9	84.47	69.16	0	9.31	9.8	5.88	8.4	5.65	1.5	5.4	34.89
0.6	0.72	3.3	0.3	9.5	65.38	61.76	48.91	0.1	0.1	0.1	2	4.7	0.1	13.35	4.1	10.8
0.1	0.3	0.1	17.92	8.3	57.53	28.7	39.19	0.1	19.75	22.29	15.64	6.3	0.9	33.76	3	5.1
0.1	14.72	13.63	0.2	13.6	27.6	35.8	17.1	14.03	11.72	12.7	11.8	6.7	0.1	27.48	1	14.2
0.1	7.3	48.32	1.2	2.3	16.48	43.23	24.7	25.01	0.9	0.7	10.2	0.2	0.1	34.76	0.1	17.41
0.1	1.8	54.18	0.1	5.79	21.17	32.08	26.82	35.25	0.1	0.1	8.1	3.8	0.1	14.6	0.1	6.8
0.1	0.1	18.9	0.1	2.2	28.47	2.05	33.39	16.3	1.5	1.1	3.1	1.6	0.1	6.2	0.1	15.6
0.1	0.1	11.58	0	0.8	25.12	2.4	62.11	0.1	0	0	2.8	0.1	0.1	3.7	0.1	27.41
1.3	0	15.38	0.1	0.1	7.23	0.1	48.88	1.1	0.1	0.1	12.9	1.34	1.5	1	0.1	47.79
3.3	0.1	18.6	6.37	19.52	63.5	1.37	32.62	27.11	1.6	1.2	3.23	3.4	1.7	0.8	0.3	31.46
11.87	4.5	0.2	0.6	14.23	28.04	9.5	30.34	0.1	0.1	0.1	16.51	39.34	7.6	23.4	7.06	16.4
7.2	2.3	33.82	0	13.55	45.63	28.66	17.59	8.4	0.1	0.1	27.71	45.92	3.4	49.14	12.3	3.2
2.5	0.1	93.69	15.19	6.9	23.16	7.9	21.7	60.79	6.89	6.8	36.04	8.4	0.1	37.07	10	10.7
0.6	32.75	35.2	0.9	1.04	7.11	2.55	14.41	39.86	0.1	0.1	45.74	6.1	0.1	43.96	4.6	3
3.1	8.3	112.66	0.1	4.4	3.37	1	24.52	13.6	0.1	0.1	29.1	3.2	0.1	27.77	0.5	9
0.8	1.5	48.74	0.2	5.9	6.94	1.2	46.1	46.6	0.1	0.1	4.6	2.2	0.1	6.2	2.5	33.87
2.4	2.7	15.11	2.3	0.1	16.88	3.7	33.9	7.67	0.1	0.1	8.81	2.5	32.42	3.1	14.58	28.85
6.4	0.8	2.1	0.1	7.7	11.6	3.25	22.88	9.2	0.1	0.1	12.72	29.48	22.33	18.29	34.15	9
1.3	11.1	2	0.1	0.5	11.9	5.3	15.73	16.7	0.1	0.1	13.62	8.04	0.3	11.71	15.94	5.3
2	12	6.5	0	0.1	17.33	2.8	18.89	15.8	0.1	0.1	0.5	3.52	0.1	1	1.3	25.12
4.32	12.2	1.3	0.1	0.1	23.1	5.81	21.18	8.5	16.2	18.77	1.2	2.4	0.1	6.55	3.3	18.6
6.3	1.7	6.35	0.1	0.1	5.5	0.9	12.14	13.69	3.2	2.8	1.3	3.8	0.1	1.1	3	17.09
2	2.2	8	46.47	0.1	2	0.1	15.4	7.6	68.03	64.82	7.18	0.1	0.1	16.13	6.4	8.8
2.1	0.1	36.12	8.4	0.1	4.5	0.1	13	15.3	1.8	1.4	7.04	0.1	0.1	23.51	0.6	6.7
0.4	0.1	37.55	0.4	0.1	7.4	0.1	10.5	22.49	0.1	0.1	2.8	0.6	0.1	6.9	0.2	14.29
2.92	0.4	28.31	0.1	0.1	1	0.1	32.36	7.88	0.1	0.1	1.6	1.6	0.1	2.3	0.1	28.21
0.9	0.1	16.1	0	0.1	0.1	0.1	58.24	2.4	0.1	0.1	9.4	0.2	0.1	11.4	2.5	37.12
0.1	0.1	10.4	0.1	0.1	0.1	0.1	62.37	3.96	0.1	0.1	19.41	0.1	0.1	26.3	0.3	17.9
1.2	0	8.9	0	0.1	0.85	0.1	71.53	0.1	0.1	0.1	26.05	0.1	0.1	19.1	0.1	22.82
2.7	0	75.72	0	0.1	5.98	0.2	51.32	7.5	0	0	38.24	0.1	0.1	10.9	0.1	13
3.3	0	34.61	0.1	0.8	18.55	0.1	31.23	12.6	0.1	0.1	26.28	0.1	0.1	29.48	0.2	10.43
7.1	8.61	6.75	5.8	7.7	11.9	0.1	4.44	14	32.83	37.93	4	0.1	5.4	2.7	1.6	14.46
4.2	41.16	10.5	0.4	0.8	4.2	0.1	4.5	4.3	0.1	0.1	1.6	0.4	13.84	0.8	19.36	0.1
3.5	11.94	2.2	0.4	0.1	0.4	2.55	0.5	3.4	0.3	0.2	8.4	0.1	15.32	1.7	20.13	0.1
2.8	1.1	0.1	2.04	0.1	0.1	0.1	0.1	0.2	10.5	11.3	13.4	2.9	8.99	9.48	1.2	0.1
7.6	0.1	9.8	1	1.8	0.1	0.1	0.1	4.2	17.63	19.98	25.7	10.1	2.8	19.34	1.1	0.1
6.1	0.1	23.52	0	4.8	6.4	0.1	0.1	69.54	0.1	0.1	15.99	0.3	5.9	21.2	3.04	1.9
2.6	0.1	35.49	0.1	0.1	0.1	0.1	0.1	39.58	0.1	0.1	13.41	8.7	4.96	19.3	4.82	2.5
4.6	0.1	31.37	0.1	0.1	0.3	0.3	0.1	1.7	0.1	0.1	21.31	0.2	14.14	27.77	8.2	0.2
7.2	0.1	26.28	0.1	0.1	2	0.1	0.1	7.5	25.88	28.42	18.21	0.2	9	37.98	12.5	0.1
22.74	0.7	7.5	1	1.1	0.8	0.1	0.1	16.1	17.39	19.84	10.68	5.9	4.9	16.75	11.18	0.4
6.06	0.1	7.9	13.09	0.1	1	0.1	0	19.01	44.37	50.99	6.8	6.02	11.22	4.3	14.2	0.3
13.73	0.1	8.3	1.5	0.1	10.91	0.1	0.1	17.33	4.2	3.9	2.5	2.8	21.8	5.5	18.29	0.1
19.49	18.69	1.5	1	3.5	14.58	2.8	0.1	10.42	0.1	0.1	7	0.1	30.45	2.4	3.75	0
4	23.54	0.1	0.1	0.1	9.3	9.9	0.1	9.6	18.21	20.7	3.5	0.1	7.57	1.1	13.29	0.1
3.1	16.2	0	0	6.3	11.81	8	0.1	5.7	0.7	0.5	0.1	4.8	13.58	0	15.07	0.2
1.8	4.6	0	0.1	7.5	9.53	5.5	0.1	0	2.1	1.6	0.1	5.71	2.63	0.1	18.29	1.3
5.9	0.1	0	0.1	0.2	1.5	1.9	0.1	0	14.01	15.96	0.7	8.5	7.31	0.1	22.64	0.6
4.4	1.16	0	0.1	0.1	2.5	0.37	0.62	0	9	9.3	0.4	2.95	24.27	0.1	24.28	1.2
1.7	1.7	0	0.1	13.12	25.3	0.1	3.5	0.1	11.1	12	0.6	33.41	36.37	0.1	9.2	3.2
4.1	0.1	0.1	0	23.21	26.81	0.7	4.9	0.1	1.7	1.3	0.1	26.9	29	0.2	27.64	17.37
6.06	0.1	11.14	0.1	32.53	14.8	0.1	12.5	5.12	12.31	13.46	10.25	11.09	7	13.5	0.7	21.31
5.7	18.25	33.53	9.61	17.72	4.68	0.1	18.87	8.4	8.06	7.9	2.6	0.7	1.3	11.1	0.8	11.41
6.4	9.21	20	4.5	10.78	3.84	0.7	15.2	29.99	25.82	28.24	0.1	2.1	1.8	0.1	5.5	20.81
4.9	24.41	0.1	40.87	5.7	6.3	1.7	26.34	1.8	15.29	17.33	2.1	0.1	4	0.1	6.2	34.73
15.57	18.96	19.3	0	18.5	2.5	2.3	16.2	5.48	0.1	0.1	0.4	5.18	0.3	3.4	1.9	29.8
10.3	25.64	13.1	0	17.53	6.7	0.2	8	5.6	4.13	3.9	2.2	1.7	2.8	0.8	8.4	15.88
7.57	15.96	0.1	0	26.52	10.57	0.7	21.5	0.1	0.7	0.5	2.6	0.2	6.9	2.1	0.2	25.59
6.01	2.9	13.9	0	5.1	4.1	0.1	15.51	5.6	7.9	7.7	5.31	0.8	1.3	25.6	0.1	21.81
2.04	17.8	24.6	0.3	1	0.1	0.1	23.81	9.45	4.27	3.96	13.31	0.1	0.7	18.3	0.1	11.58
0.3	16.41	2.2	0.7	0.1	0.1	0.1	12.11	9.44	0.1	0.1	5.3	0.1	0.2	15	0.1	4.9
0.9	2.1	13.9	0.4	0.1	2.4	0.1	8.3	13.33	0.1	0.1	22.6	0.1	1.5	6.3	0.1	6.5
0.1	1.1	32.78	7.88	0.1	5.2	0.1	15.12	10.98	17.32	19.69	5.75	0.1	0.5	10	0.1	15.58
0.1	0.1	27.24	0	0.4	26.38	0.1	5	16.22	0.1	0.1	3.17	0.1	0.1	7.98	0.1	22.17
0.3	0.4	4.3	0.1	15.19	18.5	0.1	5.7	7	0.1	0.1	1.5	1.4	17.19	1	0.1	14.25
5.9	30.29	2.4	0	18.61	0.4	0.1	1.5	2.86	0.1	0.1	0.1	1.6	20.06	0.1	0.1	1.2
3.76	1.3	0.2	0.1	2.7	0.1	0.1	4.7	0.1	0.4	0.3	3.7	3.4	3.3	0.1	28.28	1.2
3.1	0.1	1.8	0.1	0.1	0.1	0.1	1.5	0.1	6.8	6.6	30.98	1.6	0.73	0.6	0.7	1.2
1.3	0	0.1	0	0.1	0.1	0.1	7.4	0	0.1	0.1	27.13	0.1	0.1	3.9	2.4	4.4
0.3	0	0.28	0.1	0.1	0.1	0.1	4.8	0	0.1	0.1	44.86	0.1	0.3	0.1	0.1	1.6
0.1	0	5.72	0	0.1	0.1	0.1	13.09	0.1	0	0	38.58	0.1	0.1	18.53	0.1	7.1
0.1	0	8.1	0	0.1	0.1	0.1	13.8	0.1	0	0	34.96	0.1	0.1	17.3	0.1	8.57
0.1	0	13.52	0	0.1	0.1	0.1	1.5	0	0	0	38.36	0.1	0.1	36.09	0.1	13.02
0.1	0	13.5	0	0	1.3	0.1	0.1	0	0	0	3.53	0.5	41.48	15.35	0.1	0.1
8.49	0	0.4	0	0.1	0.1	0	0.1	0.1	0	0	0.1	2.4	23.1	0.1	31.76	0.1
14.32	0	0	0	0	0.1	0.1	0.1	0.1	0	0	0.1	6.74	10.7	0.1	39.39	0
4.4	0	2	0	0	0.1	0	0.1	0.1	0	0	5.2	4.41	8.73	3.3	6.61	0.1
16.2	0	5.88	0	0.1	1.78	0	0.1	0.1	0	0	10.41	2.9	1.5	12.5	7.2	0
21.35	0.1	0.1	0	4.8	6.7	0	2.8	4.4	0	0	9.27	8.2	4.19	3.9	4.69	0.1
23.06	0.1	0.1	0	7.41	6.4	0.1	2.3	0	0	0	1.2	23.48	63.39	1.95	35.31	4.9
18.33	0.1	14.8	0	1.5	28.39	0.1	0.4	0.1	0	0	9.01	7.48	50.38	5.5	50.4	0.9
2	0.1	11.7	0	0.1	59.79	0.1	0.1	10.37	0	0	0.9	0.2	17.29	2.6	0.1	0.1
0.1	2	10.91	0	14.29	63.5	0.1	0.2	16.2	0	0	0.2	0.1	0.1	0.1	0.1	0.4
0.1	0.3	6	0	2.1	83.51	0.1	0.1	25.99	0	0	1.8	0.1	0.1	3.09	0.1	0.9
0.1	0	16.8	0	2.3	33.9	0.1	0.1	32.18	0	0	0.1	0.1	0.1	3	0.1	0.1
0.1	0.1	5.1	0	5.4	18.09	0.1	0.1	19.69	0	0	0.1	0.1	2.8	1.5	0.1	0.1
0.1	2.5	0.1	0	8.1	2.8	0	0.1	15.2	0.4	0.3	0.6	1.1	0.1	0.1	0.1	0.1
0.1	5.7	5.99	0	0.1	0.6	0.1	0.1	8.23	0.1	0.1	0.1	0.1	0.1	0.1	0.1	0.1
0.1	0.3	14.81	0	0.1	1.5	0	1	24.4	1.7	1.3	3.1	0.1	0	1.3	0.1	1.4
0.1	0.1	28.86	0	1.8	6.7	0	0.1	10	0	0	2.6	0.1	0.1	14.2	0.1	0.8
0.1	0.1	16.74	0	0.9	2.5	0.1	9.2	1.14	0	0	2	0.1	4.8	28.22	0.1	11.42
0.1	0	25.56	0	0.1	3.1	0.1	8	0	0	0	2.5	1.2	34.54	7.3	5	21.45
0.9	0	13.8	0	0.1	9.97	0	4.9	0	0	0	0.1	0.9	35.23	11.6	45.71	2.1
0.1	0	0.1	0	0	5.01	0	1.2	0.1	0	0	1.5	0.7	0.4	4.55	8.5	1.9
0.1	0	0.1	0	0.1	0.3	0	0.1	0.1	0.1	0.1	0.1	0.3	0.1	6.6	0.2	2.2
0.3	0.1	0	0	0	0.1	0	2.4	0.1	0.1	0.1	0.1	0.1	0.1	0.1	0.1	0.1
5.3	0.1	0	0.1	0.1	0.1	0	0.1	0	0.1	0.1	0.1	0.1	0.9	0.1	0.5	0.1
35.22	0	0.1	0.1	0.1	4.1	0.1	2.3	0.1	7.42	7.1	0.3	0.3	14.17	0.1	21.16	1.1
74.76	0	0.8	0	0	1.4	0	0.1	0.7	0	0	0.1	0.1	0.3	0.1	33.48	0.1
82.86	0	0	0	0.1	5	0	1.6	0.1	0	0	0.1	0.1	3.4	0.1	25.14	2.6
101.1	0	3.5	0	0.1	5.2	0	11.7	0.1	0	0	7.47	0.97	11.93	9.45	97.77	1.8
2.9	0.1	24.78	0	0.1	21.3	0.1	0.1	2.8	0	0	2.2	0.4	25.6	6.1	47	0.6
0.1	0.1	10.3	0	3.52	21.9	0	0.1	12.99	0	0	0.1	17.58	23.61	0.2	0.1	0.1
0.1	0.1	5.3	0	4.2	33.86	0	0	21.34	0	0	0	0.1	0.1	0.1	0.1	0.1
0.1	0.1	4.8	0	3.7	14.99	0	0.1	28.79	0	0	0.1	0.1	0.1	0.1	0.1	0.1
0.1	0.1	0.3	0	0.1	11.2	0.1	0.1	35.5	0	0	0.1	0.1	0.1	0.1	0.1	0.9
0.1	0	4.52	0	0	0.8	0.1	0.1	6.3	0	0	0.1	0.1	0.1	0.1	0.1	0.1
0.1	0	2.22	0	0	0.1	0	0.1	0.1	0	0	0.1	0.1	0.1	0.1	0.1	0.1
0.1	0	2.3	0	0	0	0	0.1	0	0	0	0.2	0	0	3.4	0.1	0.1
1.3	0	0.1	0	0	0.1	0	2.3	0	0	0	0	0	0	4.2	0.1	0.1
0.1	0	0	0	0	0.1	0	4.8	0	0	0	0.1	0	0	0.1	0.1	0.1
0.1	0	0.1	0	0	0.1	0	7.3	0	0	0	0.1	0	0	2.5	0.1	7.9
0.1	0	2.5	0	0	0.1	0	1.6	0	0	0	0.1	0	0	3.2	0.1	15.8
0.1	0	15.56	0	0	12.5	0	0.1	0.1	0	0	0.1	0	0	0.9	0.1	1.9
0.1	0	13.2	0	0	8.31	0	0.1	2.23	0	0	0.1	0	0	0.2	0	1.6
0.1	0	2.4	0	0	3.5	0	0.1	0.1	0	0	0.1	0	0	0.8	0.1	0.1
0	0	0.8	0	0	1	0	0.15	0.1	0	0	0.1	0	0.1	0.4	0	0.1
0.1	0	0	0	0	0.3	0	0.1	0	0	0	0.1	0	5.6	0.1	0	0.7
0.1	0	0	0	0	0.4	0	0.1	0	0	0	0.1	0	0.1	0	0	1.5
0.1	0	0	0	0	0.1	0	0.1	0	0	0	0.1	0	0.1	0	0.1	1.1
0.6	0	0	0	0	0.1	0	0.4	0	0	0	0.1	0	0.1	0	0.1	0.3
2.9	0	0	0	0	0	0	1.7	0	0	0	0.1	0	0.1	0	1.93	0.1
6	0	0	0	0	0.1	0	0.9	0	0	0	0.4	0.1	3.35	0	2.7	0.1
4.74	0.1	0	0	0.1	0.1	0	2.8	0.1	0	0	0.2	0.1	0.1	0	3.5	2.2
0.7	0	0.1	0	0	0.1	0	12.4	0.22	0	0	0.2	0.1	0.1	0.1	1.9	0.1
0.4	0	0	0	0	0.1	0	6.87	0	0	0	0	0.1	0.1	0.1	0.2	0.4
0.1	0	0	0	0	0	0	7.2	0	0	0	0	0	0.1	0	0.1	0
2.3	0	0	0	0	0	0	0	0	0	0	0	0	0	0	0.1	0
0.1	0	0	0	0	0	0	0	0	0	0	0	0	0	0	0	0
0.1	0	0	0	0	0	0	0	0	0	0	0	0	0	0	0	0
0	0	0	0	0	0	0	0	0	0	0	0	0	0	0	0	0
0.3	0	0	0	0	0	0	0	0	0	0	0	0	0.1	0	0.1	0
1	0	0	0	0	0	0	0	0	0	0	0	0.1	0.1	0	0.1	0
0.1	0	0	0	0	0	0	0	0	0	0	0	0	0.1	0	0.1	0
1.1	0	0	0	0	0	0	0	0	0	0	0	0	0.1	0	0.1	0
0.1	0	0	0	0	0	0	0	0	0	0	0	0	0	0	0.1	0
0.1	0	0	0	0	0	0	0	0	0	0	0	0	0	0	0	0
0	0	0	0	0	0	0	0	0	0	0	0	0	0	0	0	0
0	0	0	0	0	0	0	0	0	0	0	0	0	0	0	0	0
0.1	0	0	0	0	0	0	0	0	0	0	0	0	0	0	0	0
0.1	0	0	0	0	0	0	0	0	0	0	0	0	0	0	0	0
0.4	0	0	0	0	0	0	0	0	0	0	0	0	0.1	0	0.1	0
0.7	0	0	0	0	0	0	0	0	0	0	0	0	0.1	0	0.1	0
0.1	0	0	0	0	0	0	0	0	0	0	0	0.1	0.1	0	0.1	0
0.1	0.1	0	0	0	0	0.1	0.1	0	0	0	0	0.1	0	0	0.1	0
0.2	0.1	0	0	0	0	0.1	0	0	0	0	0	0	0	0	0	0
0.1	0.1	0	0	0	0	0.1	0	0	0	0	0	0	0	0	0	0
0.1	0.1	0	0	0	0	0.1	0	0	0	0	0	0	0	0.3	0	0.1
0	0	0	0	0	0	0	1	0	0	0	0.1	0	0	2.4	0	0.1
0	0	0.1	0	0	0	0	13.29	0	0	0	0.1	0	0	1	0	9.4
0	0	0	0	0	0.1	0	0.1	0	0	0	0	0	0	0	0	0.1
0	0	0	0	0	0.1	0	0.1	0.1	0	0	0	0	0	0	0	0.1
0.1	0	0	0	0	0.1	0	0	0	0	0	0	0	0	0.3	0	0.1
0.1	0	0	0	0	0.1	0	0	0	0	0	0	0	0	0.1	0.1	0.1
0.1	0	0	0	0	0.1	0	0	0	0	0	0	0	0	0	0	0
0.1	0	0	0	0	0	0	0	0	0	0	0	0	0.1	0	0.1	0
0.1	0	0	0	0	0	0	0	0	0	0	0	0	0.1	0	0.1	0
0.1	0	0	0	0	0	0	0	0	0	0	0.1	0	0.1	0	0.1	0
0.1	0	0	0	0	0	0	0.1	0	0	0	0.1	0	0.1	0	0	0
0.1	0	0	0	0	0	0	1	0	0	0	0.1	0	0	0.1	0	0
0.1	0	0	0	0	0	0	0	0	0	0	0.1	0	0	0	0	0
0.1	0	0	0.1	0	0	0	0	0	0.1	0.1	0	0	0	0	0	0
0	0	0	0	0	0	0	0	0	0.1	0.1	0	0	0	0	0	0
0.1	0	0	0	0	0	0	0	0	0	0	0	0	0	0	0	0
0	0	0	0	0	0	0	0	0	0	0	0	0	0	0	0	0
0	0	0	0.1	0	0	0	0	0	0.1	0.1	0	0	0	0	0	0
0	0	0	0.8	0	0	0	0	0	3.1	2.6	0	0	0	0	0	0
0	0	0	0	0	0	0	0	0	0	0	0	0	0	0	0	0
0	0	0	5.3	0	0	0.1	0	0	0.1	0.1	0	0	0	0	0	0
0	0.1	0.1	0.1	0	0	0	0	0.1	0.1	0.1	0	0	0	0	0	0
0	0	0	0	0	0	0	0	0	0	0	0	0	0	0	0	0
0	0	0	0	0	0	0	0	0	0	0	0	0	0	0	0	0
0	0	0	0	0	0	0	0	0	0	0	0	0	0	0	0	0
0	0	0	0	0	0	0	0	0	0	0	0	0	0	0	0	0
0	0	0	0	0	0	0	0	0	0	0	0	0	0	0	0	0
0	0	0	0	0	0	0	0	0	0.1	0.1	0	0	0	0	0	0
0	0	0	0	0	0	0	0	0	0	0	0	0	0	0	0	0
0	0	0	0	0	0	0	0	0	0	0	0	0	0	0	0	0
0	0	0	0	0	0	0	0	0	0	0	0	0	0	0	0	0
0	0	0	0	0	0	0	0	0	0	0	0	0	0	0	0	0
0	0	0	0	0	0	0	0	0	0	0	0	0	0	0	0	0
0	0	0	0	0	0	0	0	0	0	0	0	0	0	0	0	0
0	0	0	0	0	0	0	0	0	0	0	0	0	0	0	0	0
0	0	0	0	0	0	0	0	0	0.1	0.1	0	0	0	0	0	0
0	0	0	0	0	0	0	0	0	0	0	0	0	0	0	0	0
0	0	0	0	0	0	0	0	0	0	0	0	0	0	0	0	0
0	0	0	0	0	0	0	0	0	0	0	0	0	0	0	0	0
0	0	0	0	0	0	0	0	0	0	0	0	0	0	0	0	0
0	0	0	0	0	0	0	0	0	0	0	0	0	0	0	0	0
0	0	0	0	0	0	0	0	0	0	0	0	0	0	0	0	0
0	0	0	0	0	0	0	0	0	0	0	0	0	0	0	0	0
0	0	0	0	0	0	0	0	0	0	0	0	0	0	0	0	0
0	0	0	0	0	0	0	0	0	0	0	0	0	0	0	0	0
0	0	0	0	0	0	0	0	0	0	0	0	0	0	0	0	0
0	0	0	0	0	0	0	0	0	0	0	0	0	0	0	0	0
0	0	0	0	0	0	0	0	0	0	0	0	0	0	0	0	0
0	0	0	0	0	0	0	0.1	0	0	0	0	0	0	0	0	0
0	0	0	0	0	0	0	0.1	0	0	0	0.1	0	0.1	0	0	0
0	0	0	0	0	0	0.1	0.1	0	0	0	0.1	0	0.1	0	0	0
0	0	0	0	0	0	0.1	0.1	0	0	0	0.1	0.1	0.1	0	0.1	0
0	0	0	0	0	0	0.1	0	0	0	0	0.1	0.1	0.1	0	0	0
0	0	0	0	0	0.1	0.1	0	0	0	0	0	0.1	0	0	0	0
0	6.8	0	21.46	0.1	0.1	0.1	0	0.1	5.4	5	0	0.1	0	0	0	0
0	0.1	0.1	9.61	0.1	0.1	0	0	0.1	2.4	1.97	0	0	0.1	0	0.1	0
0	0	0	0	0	0.1	0	0	0	0	0	0	0	0.1	0	0.1	0
0	0	0	0	0	0	0	0	0	0	0	0	0	0	0	0.1	0.1
0.1	0	0	0	0	0	0	0	0	0	0	0	0	0	0	0	0.1
0	0	0	0	0	0	0	0	0	0	0	0	0	0	0	0	0
0	0	0	0	0	0	0	0	0	0	0	0	0	0	0	0	0
0	0	0	0	0	0	0	0	0	0	0	0	0	0	0	0	0
0	0	0	0	0	0	0	0	0	0	0	0	0	0	0	0	0
0	0	0	0	0	0	0	0	0	0	0	0	0	0	0	0	0
0	0	0	0	0	0	0	0	0	0	0	0	0	0	0	0	0
0	0	0	0	0	0	0	0	0	0	0	0	0	0	0	0	0
0	0	0	0	0	0	0	0	0	0	0	0	0	0	0	0	0
0	0	0	0	0	0	0	0	0	0	0	0	0	0	0	0	0
0	0	0	0	0	0	0	0	0	0	0	0	0	0	0	0	0
0	0	0	0	0	0	0	0	0	0.1	0.1	0	0	0	0	0	0
0	0	0	0.1	0	0	0	0	0	0.1	0.1	0	0	0	0	0	0
0	0	0	0.1	0	0	0	0	0	0.6	0.5	0	0	0	0	0	0
0	0	0	0.1	0	0	0	0	0	0.1	0.1	0	0	0	0	0	0
0	0	0	0	0	0	0	0	0	0	0	0	0	0	0	0	0
0	0	0	0	0	0	0	0	0	0	0	0	0	0	0	0	0
0	0	0	0.1	0	0	0	0	0	0.1	0.1	0	0	0	0	0.1	0
0	0.1	0	3.7	1.1	0.1	0	0	0.1	1.6	1.3	0	0.1	0.1	0	0	0.1
0	0	3.1	0.1	0	0.1	0	0	0.2	0.1	0.1	0	0.1	0	0.1	0.1	0.1
0	0	0.1	0	0	0.1	0	0.1	0.1	0	0	0.1	0	0	2.6	0.1	2.1
0	0	0	0	0	0	0	4.8	0	0	0	0.1	0	0	0.1	0.1	2.8
0	0	0	0	0	0	0	0.1	0	0	0	0	0	0	0	0.1	0.1
0	0	0	0	0	0	0	0	0	0	0	0	0	0.1	0	0	0
0	0	0	0	0	0	0	0	0	0	0	0	0	0.1	0	0	0
0	0	0	0	0	0	0	0	0	0	0	0	0	0	0	0	0
0	0	0	0	0	0	0	0	0	0	0	0	0	0	0	0	0
0	0	0	0	0	0	0	0	0	0	0	0	0	0	0	0	0
0	0	0	0	0	0	0	0	0	0.1	0.1	0	0	0	0	0	0
0	0	0	1.5	0	0.1	0	0	0	0.1	0.1	0	0	0	0	0	0
0	0.1	0	0.3	0.1	0	0	0	0	0.1	0.1	0	0	0	0	0	0
0	0.1	0	2.3	0	0.1	0	0	0.1	10.3	11.17	0	0	0	0	0	0.1
0	0.1	0	22.92	0.1	0.1	0.1	0	0.1	5.59	5.43	0	0	0	0	0	0
0.1	0.3	0.1	8.21	4.1	4.1	0.1	0	6.4	2.2	1.7	0	0.1	0.1	0	0.1	0.1
0	0	26.9	0.1	0	2.5	0	0	4.8	1.2	0.9	0	0	0.8	0.8	0.1	0.1
0	0	0.1	0.1	0	0	0	0.5	0.7	0.1	0.1	0.1	0	0.1	0	0	5
0	0.1	0.1	6.2	0.1	0	0	1.48	0.1	7.6	7.3	0	0	0	0	0	0.1
0	0.1	3.7	0.2	0.1	0.1	0	17.95	0.1	0	0	0.1	0	0	1.1	0	3.8
0	0	0	0	0	0	0	20.6	0	0.1	0.1	2	0	0	0.1	0	0.1
0.1	0	0	0.5	0	0	0	0	0	0.4	0.3	0	0	0	0	0	0
0	0.1	0	1.3	0	0	0	0	0	1.5	1.2	0	0	0	0	0.1	0
0.1	0.11	0.1	3.4	0	0	0.1	0	0.1	1.4	1	0.1	0	0.1	0.1	0	0
0	0.1	4.3	0.1	0	0.1	0.1	5.7	1.2	0.5	0.4	0.1	0	0.1	0.4	0.1	6.3
0.1	0.1	17.99	10	0.1	0.1	0.1	2.34	3	10.21	11.02	4.4	0.1	0.1	9.3	0	2.6
0.1	0.1	14.37	2.1	0.1	0.1	0.1	0	0.9	22.23	23.82	7.3	0.1	0.1	19.74	0	0.4
0	0	3.5	0	0	0	0	0	0.1	0.1	0.1	20.9	0	0	13.1	0	8.44
0	0	0	0	0	0	0	14.05	0	0	0	5.1	0	0	0	0	0.1
0	0	0	2.5	0	0	0	0	0	5.4	5.02	0	0	0	0	0	0
0	0.1	0	3.26	0	0	0	0	0.1	11	11.86	0	0	0	0	0	0
0	0	0	0	0	0	0	0	0	0	0	0	0	0	0	0.1	0
0	0.1	0	0.2	0.1	0	0	0	0	0.1	0.1	0	0.1	0.1	0	0.1	0
0	0.1	0	16.53	0.1	0	0	0	0.17	11.78	12.7	0	0.1	0	0	0	0
0	0	0.1	0	0	0.1	0	0	0.2	0	0	0	0	0	0	0	0.1
0	0	0	0	0	0.1	0	0.1	0	0	0	0	0	0	0	0	0.1
0	0	0	0	0	0	0	0.1	0	0	0	0	0	0	0	0.1	0
0	0	0	0.1	0	0	0	0	0	0.1	0.1	0	0	0	0	0.1	0
0.1	0	0	1.4	0	0	0	0	0	0.1	0.1	0	0	0	0	0.1	0
0	0.1	0.1	2.3	0.1	0	0	0	0.1	0.8	0.6	0	0	0	0	0	0.1
0	0	5.1	0	0	0.1	0	0	1.6	0.1	0.1	0.1	0	0.1	2.9	0	1.2
0	0	5.6	0.1	0	0	0	6.19	0.1	0.1	0.1	9.42	0	0	8.9	0	7
0	0	0	9.1	0	0	0	0	0	11.89	12.8	0	0	0	0	0	0
0	0	0.1	0.1	0	0	0	0	0.1	0.1	0.1	0	0	0	0.1	0	0
0	0.1	0	0	0.1	0.1	0	0	0	0.1	0.1	0	0	0	0	0	0
0	0	0	0	0	0	0	0	0	0	0	0	0	0	0	0	0
0	0	0	0	0	0	0	0	0	0	0	0	0	0	0	0	0
0.1	0	0	0	0	0	0	0	0	0	0	0	0	0	0	0	0
0.1	0	0	0	0	0	0	0	0	0	0	0	0	0	0	0	0
0.1	0.1	0	0	0	0	0	0	0	0	0	0	0	0	0	0.1	0
0	0.1	0	0	0	0	0	0	0	0	0	0	0.1	0	0	0.1	0
0.1	0.1	0	0	0	0	0	0	0	0	0	0	0.1	0	0	0.1	0
0.1	0.1	0	0	0.1	0	0.1	0	0	0	0	0.1	0.1	0	0	0.1	0
0.1	1.7	0	3.4	0.6	0	0	0	0	0.1	0.1	0.1	0.1	0.1	0	0.1	0
0.2	0.1	0.1	0.1	2.5	0.1	0.1	0	0.7	0	0	0.1	0.1	3.35	0.1	0.1	0
0.1	0.1	0	0.8	5.5	0.1	0.1	2	0.1	4.5	4.1	0.4	0.9	5.39	0	0.1	0.1
0.1	0.1	0	5.4	0.1	0	0	15.89	0	0.1	0.1	4.8	0.1	1.4	0.1	0.1	0.7
0.1	0	0	0	0	0.1	0	4.7	0	0.1	0.1	0.1	0.1	0.1	0	0.1	0.1
0.1	0	0	0	0	0	0	0	0	0	0	0	0.1	0.1	0	0.1	0
0.1	0.1	0	0	0.1	0	0	0	0	0	0	0	0.1	0.1	0	0.1	0
0.1	0.1	0	0	0.1	0	0	0	0.1	0	0	0	0	0.1	0	0.1	0
0.1	0	0	0	0	0	0	0	0	0	0	0	0.1	0	0	0.1	0
0.1	0	0	0	0	0	0	0	0	0	0	0	0	0.1	0	0.1	0.1
0.1	0	0	0	0	0	0	0	0	0	0	0	0	0.1	0	0.1	0
0.2	0	0	0	0	0	0	0.1	0	0	0	0	0	0	0	0	0
0.1	0	0	0	0	0	0	0	0	0	0	0	0	0	0	0	0
0	0	0	0	0	0	0	0	0	0	0	0.1	0	0	0	0	0
0.1	0	0	0	0	0	0	0.1	0	0	0	0.1	0	0	0	0	0.1
0.1	0	0	0.1	0	0	0	0.1	0	0	0	0.1	0	0	0	0	0
0.1	0	0	0.9	0	0.1	0	0	0.1	0.4	0.3	0.1	0	0	0	0	0
0.1	0.1	0.6	0	0	0.1	0	0	0.1	0	0	0.2	0	0.1	0.1	0.1	0.1
0.1	0.1	0	0	0	0	0	0.1	0	0.1	0.1	0.1	0	0.1	0	0.1	0.1
0.1	0.1	0	0	0.1	0	3.47	0	0	0.1	0.1	0	0.1	0.1	0	0.1	0
0.1	1.2	0	8.3	1.5	0.1	0	0	0.1	0.3	0.3	0.1	0.1	0.4	0	0.1	0
0.1	0.1	1.84	10.8	0.1	2.3	0.1	0	0.1	1.13	0.9	0	0	0.1	0.1	0	0
0.1	0	0	0.1	0	0	0	0	0	0.1	0.1	0	0	0	0	0.1	0
0.1	0	0	0	0	0	0	3.2	0	0.1	0.1	0	0	0.1	0	0.1	0.1
0	0.1	0	0.1	0	0	0	0.1	0	0.1	0.1	0	0.1	0.1	0	0.1	1.1
0	0.1	0.1	0	0.1	0.1	0	0	0.1	0.1	0.1	0.1	0	0.1	0.1	0	0.1
0.1	1	0	0.1	0	0.1	0	0.1	0.1	3.1	2.69	0.1	0	0	0	0	0.1
0.1	0.1	0.4	0.6	0	0	0.1	2.8	0	0.5	0.4	0.1	0	0	0	0	0.1
0	0	0	0.1	0.1	0	0	0.5	0.1	0.1	0.1	0.1	0	0	0	0	0.1
0	0	0	0	0	0	0.1	0.1	0	0	0	0.1	0	0.1	0	0	0.1
0.1	0.1	0	0.1	0.1	0	0	0.1	0	0.1	0.1	0	0	0.1	0	0	0.1
0.4	0.1	3.7	0	0.1	0.1	0	0.1	0.9	0	0	5.1	0	0.1	0.1	0	0
0	0.1	4.9	0.1	2.5	0.1	0	21.7	0.1	0.1	0.1	2.32	0	0	1.7	0	0.1
0	0	0	0	0	0	0	16.58	0	0	0	0.1	0.1	0.1	0	0	0.1
0.1	0	0	0	0.1	0	0	0.1	0	0	0	0	0.1	3.6	0	0.1	0
1.1	0.1	0	0	0.1	0	0	0	0	0.5	0.4	0	0.1	0.1	0	2.1	0.1
0.1	0	0	0	0.1	0.1	0	0.1	0.1	0	0	0.1	0.1	0.1	0	0.1	0
0.1	0	0	0	0.1	0.1	0	0.1	0	0	0	0.1	0.1	0.1	0	0.2	0.1
3.7	0	0	0	0	0	0	0.1	0	0	0	0.1	0	0	0	0.1	0
0.6	0	0	0	0	0	0	0	0	0	0	0.1	0	0.1	0	0.1	0
0.1	0	0	0.1	0	0	0	0	0	0	0	0.1	0.1	0.1	0	0.1	0
0.1	0.1	0	0.6	0.1	0	0	0	0.1	0.1	0.1	0.1	0	0.1	0	0.1	0
0.1	0.1	0.1	5.8	0.1	0.1	0	0	0.1	0.1	0.1	0.1	0.1	0.1	0.4	0.1	0.9
0.1	0.1	0.1	1.8	0	0.1	0	0	0.1	1.2	0.9	2.7	0.1	0	3.4	0.1	1.5
0.1	0	0.7	0	0	0	0	0	0	0.1	0.1	1	1.2	0	0.1	0	1.1
0.1	0	0	0	0.1	0	0	0.3	0	0	0	4.9	0.1	0	0.1	0.1	0.1
0	0	0	0	0.1	0.1	0.1	0.1	0	0	0	0.1	2.7	0.9	0	0	0
0.1	0.1	0	0	2.6	0.3	2.92	0	0.1	0	0	0.1	22.3	5.6	0	0.1	0.3
0.1	0.1	2.88	0	0.2	0.7	0.9	11.64	0.1	0	0	0.1	0.1	5.8	0.1	0.1	2.2
0.3	0.1	0	0	0.1	0	32.36	0.1	0	0	0	0	0.1	0.2	0	0.1	0
0.1	0.1	0	11.8	0	0.1	42.35	0	0.1	3	2.5	0	0.1	0	0	0.1	0
0.3	0.1	0.1	64.66	0.1	0.1	18.2	0	0.1	128.3	194.1	0	0.1	0	0	0.1	0.1
0.1	0.4	0.1	0	0.1	0	2.1	0.1	0.1	0.1	0.1	0.1	0.7	0	0.1	0.1	0.3
0.2	0.1	0	0	0.1	0	0.1	0.7	0	0	0	8.6	0.1	0.1	0.1	0.1	0.1
0.3	0	0	0	0	0.1	0.1	0.1	0	0	0	1.2	0.1	3.1	0	0.1	0
1.8	0.1	0	0.1	0	0.1	0.1	0	0	0.1	0.1	0.9	0	5.3	0	0.1	0
1	0.1	0	0	0.1	0.2	0.1	0	0	0	0	0.2	0	0.1	0.1	0.1	0.1
0.1	0.1	0.1	0	0.2	0.1	0.1	2.1	0	0	0	0.1	0.1	0.1	0.1	0.1	0.1
2.4	0.1	4.4	0	0.1	0	0	21.4	0	0	0	0.9	0.1	0.1	7.58	0.1	9
2.9	0	24.96	0	0.1	0.1	0	50.21	0	0	0	0.8	0	0.1	21.88	0.1	53.51
2.3	0	34.95	0	0	0	0	54.82	0	0	0	39.1	0	0	98.31	0.1	8.4
0.1	0	0.3	0	0	0	0	3.2	0	0	0	36.37	0	0.1	32.67	0.1	0
0.1	0	0.1	0	0	0	0	1.3	0	0	0	5.2	0	0.1	15.1	0	0.1
4.9	0	0	0	0	0	0	0.1	0	0	0	11.32	0	0	10.5	0.1	0.1
4.74	0	0	0	0	0	0	0.1	0	0	0	0.1	0	0.1	5.2	0	0.1
0.3	0	0	0	0	0.1	0	0.1	0	0	0	0.1	0	0	0.5	0.1	0.1
0.1	0	0	0	0	0.1	0.1	1	0	0	0	11.3	0	0.1	1.4	0.1	0
0.1	0	0	0	0	0	0	7	0	0	0	3.9	0	0	3.5	0.1	1.2
1.3	0	0	0	0	0	0.1	23.9	0	0	0	0.1	0	0	0.1	0.1	0.1
1.3	0.1	0	0	0	0.1	0.1	73.82	0	0	0	39.66	0	0	0.1	0.1	0.1
0.1	0.1	0	0	0	0.1	0.1	0.1	0	0	0	6.1	0	0	0	0.1	0
0.1	0.1	0	0	0	0.1	0.1	0	0	0	0	0.1	0	0	0	0	0
0.1	0.1	0	0.9	0	0.1	0.1	0	0	0	0	0.1	0	0.1	0	0.1	0
0.1	0.1	0	0.1	0	0.1	0.1	0	0	0.1	0.1	1	0	9.18	0	0.1	0
0.1	0.1	0	1.5	0	0.1	0.1	0	0	1.6	1.2	13.58	0	0.31	0	0.1	0.1
0.1	0.1	0	6.83	0	0	0.1	0.1	0.1	0.1	0.1	12.7	0	4.1	0	0.1	0
0.1	1.2	0	0.1	0	0.1	0.9	9.7	0.1	0	0	3	0	0.1	2.1	0.1	1.5
0.1	0.1	0	0	0.1	0.3	0.1	0.8	0	0	0	11.6	0.1	0.1	3	0.1	4.6
0.8	0	0	0	0	0	0.1	0.1	0	0	0	0	0	0.4	0.1	0.1	1.4
0.1	0.1	0	0	0	0	0.1	98.01	0	0	0	0.1	0.1	0.1	0.1	0.1	6.1
1.1	0	0	0	0	0	0.1	159.65	0	0	0	31.3	0.1	0.1	18.9	0.1	21.73
0.2	0	0.1	0	0	0.1	0.2	31.09	0	0	0	98.47	0	6	30.65	0.1	7.09
0.3	0.1	0	0	0	0.1	0.1	0.1	0	0	0	32.13	0.1	0.1	0.38	0.1	0.1
[truncated: 7,126 more rows]

## Sheet: RCP 4.5
Dharwad	Durgapura	Faizabad	Hisar	Indore	Jabalpur	Junagarh	Kalyani	Kanpur	Karnal	Ludhiana	Malda	Niphad	Parbhani	Patna	Pune	Ranchi
0.1	0	0.5	0.1	0.1	0.1	0	0	0.1	0.1	0.1	0	0.1	0.1	0.1	0.1	0.1
0.1	0	3.18	0	0	0	0	13.93	0	0	0	0.1	0	0.1	0.1	0.1	3.6
0.1	0	0	0	0	0	0	0.1	0	0	0	0	0	0	0	0	0.1
0.1	0	0	0	0	0	0	0	0	0	0	0	0	0	0	0	0
0.1	0	0	0	0	0	0	6.2	0	0	0	0.1	0	0.1	0	0	7.4
0.1	0	0.1	0	0	0	0	16.4	0	0	0	0.1	0	0	0	0	7.5
0	0	0	0	0	0	0	0	0	0	0	0	0	0	0	0	0
0.1	0	0	0	0	0	0	0.1	0	0	0	0	0	0.1	0	0	0
0.1	0	0	0	0	2.1	0	0.1	0	0	0	0	0	10.1	0	0.1	0
0.1	0	13.2	0	0.1	11.09	0	0.1	0.1	0	0	4.5	0.1	4.4	9.7	0.1	7.8
0.1	0	0	0	0	0.1	0	9.7	0	0	0	0.1	0	0.1	0.1	0	3.4
0.1	0	0	0	0	0	0	0	0	0	0	0	0	0.1	0	0	0
0.1	0	0	0	0.1	0	0	0	0	0	0	0	0.1	0.1	0	0.1	0
4.1	0	0	0	2.6	2.5	0.1	0.1	0	0	0	0	31.53	36.8	0	25.14	0.1
0.2	0	2.7	0	0.1	11.63	0	4.3	0.1	0	0	0.1	0	30.21	0.9	0.1	8.9
0.1	0	0	0	0	0	0	2.41	0	0	0	0.1	0	0	0.1	0.1	4.4
0.1	0	0	0	0	0.1	0	1.5	0	0	0	0.1	0.1	1.41	0	0.1	0
0.1	0.1	0	0	0.1	0.3	0	6.5	0	0	0	0.1	0	0.1	0.3	0	16.55
0	0.1	0	0	0.1	0	0	5.1	0	0	0	1.4	0	0.1	0.1	0	3.4
0.1	0.1	0	0.2	0.1	0	0	0	0	0.1	0.1	0	0	3.8	0	0	0
0.1	0	0	5.89	1.5	2.1	0	0	0.1	2.9	2.4	0	0.1	1.8	0	0.1	0.1
0.1	0.2	0.1	0.1	4.4	1.9	0	0	0.4	0.1	0.1	0	0.1	0	0	0.1	0.1
3.2	0.1	0.1	30.23	0.1	2.8	0	0	0.1	26.15	29.2	0	0	1.2	0	0.1	0.1
8.7	0.1	30.62	0.9	0	19.72	0	1.5	1	0.1	0.1	0.1	0	11.43	4.4	2.3	1.6
0.4	0.1	2.4	1	0.1	0.1	0	0.8	0.1	0	0	0.1	0.1	5.71	0.1	2.5	1.9
0.4	0.1	0	34.64	0.1	4.7	0	0.2	0.1	19.63	22.22	0	0.1	5.4	0	0.1	2
9.1	0	0	0.1	0.1	0.1	0	0	0.9	0.1	0.1	0	0.1	10.9	0	0.1	1.2
2.9	0.9	20.44	0	7.13	28.46	0	1.3	9.6	0	0	0	0.5	19.1	1	0.8	3.4
0.1	0.1	41.89	0	0.1	5.5	0	6.1	7.08	0	0	2	0.1	0.1	12	0	3.77
0	0	3.5	0	0	0.1	0	15.6	0	0.1	0.1	0.1	0.1	0	3.7	0	1.7
0	0	0.1	0	0	0.1	0	6.2	0	0	0	6.1	0	0	0.1	0	0.1
0	0	0	0	0	0	0	0.1	0	0.1	0.1	0	0	0	0	0	0
0	0	0	0	0	0	0	0	0	0	0	0	0	0.1	0	0	0
0	0	0	0	0	0.1	0	0.1	0	0	0	0	0	0	0	0	0
0	0	0.1	0	0	0	0	12.3	0	0	0	0.1	0	0	0.1	0	2
0	0	0	0	0	0	0	14.13	0	0	0	0	0	0	0	0	0.35
0	0	0	0	0	0	0	0.1	0	0	0	0	0	0	0	0	0.5
0	0	0	0.1	0	0	0	0	0	1.6	1.3	0	0	0	0	0	0
0	0.1	0	0.3	0	0	0	0	0.1	0.1	0.1	0	0	0	0	0	0
0	0	0.6	0	0	0	0	0	0.1	0	0	0.1	0	0	0.1	0	0.1
0	0	0	0	0	0	0	3.3	0	0	0	0.1	0	0	0.1	0	0
0	0	0	0	0	0	0	0.1	0	0	0	0	0	0	0	0	0
0	0	0	0.1	0	0	0	0	0	0.1	0.1	0	0	0	0	0	0
0.1	0	0	0.1	0	0	0	0	0	0.2	0.2	0	0	0.1	0	0	0
0.1	0	0.1	0.1	0	0	0	0	0	0.1	0.1	0	0	0.1	0	0	0
0	0	0.1	0	0	0	0	0.1	0	0	0	0	0	0	0	0	0.1
0.1	0	0	0	0	0	0	0.1	0	0	0	0	0	0	0	0	0
0	0	0	0	0	0	0	0	0	0	0	0	0	0	0	0	0
0.1	0	0	0.1	0	0	0	0	0	0.1	0.1	0	0	0	0	0	0
0.1	0	0	0	0	0	0	0	0	0	0	0	0	0	0	0	0
0	0	0	0	0	0	0	0	0	0.1	0.1	0	0	0	0	0	0
0	0.1	0	0.3	0	0	0	0	0	0.35	0.3	0	0	0	0	0	0
0	0.1	0	3.2	0	0	0	0	0	2.6	2.1	0	0	0	0	0	0
0	0	0	0.1	0	0	0	0	0	0.1	0.1	0	0	0	0	0	0
0	0.1	0	0	0	0	0	0	0	0	0	0	0	0	0	0	0.1
0	0.1	7.08	4.6	0.1	0.1	0	1.3	2.8	0.8	0.6	0.1	0	0	0.43	0	2.4
0	0	2.93	0	0	0	0	4.2	0	0	0	3.7	0	0	2.9	0	0.1
0	0	0	0	0	0	0	0	0	0.1	0.1	0	0	0	0	0	0
0	0	0	0.1	0	0	0	0	0	0.1	0.1	0	0	0	0	0	0
0	0.1	0.1	0.4	0	0	0	0	0	0.8	0.6	0	0	0.1	0	0	0
0	0	0.1	0	0	0	0	0	0.1	0	0	0	0	0	0	0	0.1
0	0	2.1	0	0	0	0	4.7	0.1	0	0	0.1	0	0	0.1	0	0.1
0	0	0.1	0	0	0	0	13.33	0	0	0	0.9	0	0	0.1	0	0.1
0	0	0	0	0	0	0	4.7	0	0	0	0.1	0	0	0	0	0
0	0	0	0	0	0	0	0	0	0.1	0.1	0	0	0	0	0	0
0	0.1	0	0.1	0	0	0	0	0	0.1	0.1	0	0	0	0	0	0
0	0.1	0	0.1	0	0	0	0	0	0	0	0	0	0	0	0	0
0	0.1	0.4	0.1	0.1	0	0	0	0.1	0.8	0.6	0	0	0	0	0.1	0
0	0.1	0.1	0.1	0.1	0.1	0	0	0	0.1	0.1	0	0.1	0.1	0	0.1	0
0	0.1	0.1	0.1	0	0.1	0	0	0.1	0.1	0.1	0	0	0.1	0	0.1	0
0	0	6.67	0	0	0.2	0	1.1	0.1	0	0	0.1	0	0.1	1	0	6.27
0	0	0.87	0	0	0	0	7.87	0	0	0	5.1	0	0	3.1	0	1
0	0	0	0	0	0	0	0	0	0	0	0	0	0	0	0	0
0	0.1	0	0	0	0	0	0	0	0.1	0.1	0	0	0	0	0	0
0.1	0.1	0	0	0	0.1	0	0	0	0.1	0.1	0	0	0	0	0	0
0	0	0	0.1	0	0.1	0	0	0	0.1	0.1	0	0	0	0	0	0
0	0	0	0.1	0	0.1	0	0	0.1	0.1	0.1	0	0	0	0	0	0
0	0	0	0.1	0	0	0	0	0.1	0	0	0.1	0	0	0	0	0
0	0	0.1	0	0	0	0	6.9	0	0	0	0.1	0	0	0.1	0	0.8
0.1	0	0	0	0	0	0	2.2	0	0	0	0.1	0	0	0	0	0.1
0.1	0	0	0	0	0	0	1.6	0	0.1	0.1	0	0	0	0	0	0
0.1	0	0.1	0.1	0	0	0	0.1	0.1	0.1	0.1	0	0	0	0.1	0	0
0.1	0	1.8	0	0	0	0	1	0	0	0	0.1	0	0	0.5	0	0.1
0.1	0	0.1	0	0	0	0	2	0.1	0	0	0.8	0	0	0.1	0	0
0	0	0	0	0	0	0	3.4	0	0	0	0.1	0	0	0	0	0
0	0	0	0	0	0	0	13.5	0	0	0	0.1	0	0	0.1	0	0.2
0	0	0	0	0	0	0	21.61	0	0	0	11.8	0	0	0.1	0	2.1
0	0	0.1	0	0	0	0	13.41	0	0	0	8.97	0	0	0	0	0.1
0	0	0	0	0	0	0	11.81	0	0	0	1.6	0	0	0.1	0	0.1
0.1	0	0	0	0	0	0	0.4	0	0	0	0.1	0	0.8	0	0	0.1
0.2	0	0	0	0.1	0.7	0	0.1	0.1	0	0	0	0.9	14.7	0	0.1	1.75
0.1	0.1	4.93	0	0.1	5.01	0.1	0.1	0.1	0	0	0.1	0.1	14	0.1	0.1	0.1
0.1	0.2	0.1	1.8	0	0.1	0	0.1	0	1.1	0.8	0.1	0	0.3	0.6	0.1	0.1
0.1	0.1	0	0.5	0	0	0	0	0	1.5	1.1	0	0	0.1	0	0.1	0
0.1	0	0	0	0	0	0	0	0	0	0	0	0	0.1	0	0.1	0
0.1	0	0	0	0	0	0	0	0	0	0	0	0	0	0	0.1	0
0.1	0	0	0	0	0	0	0	0	0	0	0	0	0	0	0	0
0	0.1	0	0	0	0	0	0	0	0	0	0	0	0	0	0	0
0.1	0.1	0	0	0.1	0.1	0	0	0	0	0	0	0	0	0	0	0
0.1	0.1	0	0.3	0	0.1	0	0.1	0	0	0	0	0.1	0.1	0	0	0.1
0.1	0.1	0	0.1	0.1	0.1	0	0	0	0.1	0.1	0.1	0.1	0	0	0.1	0.4
0.1	0.1	0	0	0	0.1	0	0.1	0.1	0	0	3.5	0.1	0	0	0.1	0.1
0.1	0	0	0.1	0	0	0	4	0	0	0	1.4	0.1	0	0	0.1	1.1
0.1	0.1	0	0	0.1	0	0	3.27	0	0	0	1.1	0	0	0	0.1	0.1
0.1	0.1	0.1	0.4	0	0.1	0	5	0	0.1	0.1	0.1	0	0	0.1	0.1	0.2
0.4	0	0	0	0.1	0.1	0	1.5	0.1	0	0	0.6	0.1	0	1.2	0.1	1.11
0.1	0	0	0	0	0.1	0	0.1	0	0	0	0.1	0.1	0.1	0	0.1	0.1
0.1	0	0	0	0	0	0	0	0	0	0	1.4	0	0.1	0.1	0.1	0.3
0.2	0	0	0	0	0	0	1.2	0	0	0	8.6	0	0	0.6	0.1	1.65
0.1	0.1	0.1	0.1	0	0	0	9.65	0.1	0.1	0.1	16.98	0	0.1	3.1	0.1	2.36
0.1	0	0	0.1	0	0.1	0	5	0.1	0.2	0.2	19.7	0	0.1	2.8	0	1.5
0.1	0	0	0	0	0	0	0.1	0	0	0	2.6	0.1	0	0	0.1	0.1
0.6	0	0	0	0	0	0	0	0	0	0	0.1	0.1	0.1	0	0.1	0
0.1	0.1	0	1	0	0.1	0	0	0.1	0.1	0.1	0	0.1	0.1	0	0.1	0.1
0.1	0.1	0.1	1.2	0	0.1	0	0	0.1	0	0	0.1	0	0.1	0.1	0.1	0.1
0.2	0	0.1	13.8	0.1	0	0	0.1	0.1	0.1	0.1	0.1	0.1	0.1	0	1.1	0.7
0.1	0.1	0	0.1	0.8	0.1	0	7.6	0.1	1	0.8	0.1	1.1	1	0	0.1	0.1
0.2	0.1	0.1	14.07	0	1.5	0	4.5	1.2	10.74	11.4	2	0.1	0.6	0	0.1	0.2
0.1	0.1	0	2.8	0.1	0.2	0	7.19	0.1	3.1	2.69	0.1	0	3.67	0	0.1	0.1
0.1	0.1	0	0.1	0.1	0.1	0	1.9	0.1	0.1	0.1	14	0.1	4.7	0	0.1	0.4
0.1	0.1	0	0.1	0.1	1.4	0	2.7	0	0	0	18.76	0.1	6.5	8.28	0.1	7.29
0.1	0.1	0	0.1	0.1	0.1	0	6.7	0.1	0.1	0.1	0.1	0.1	1.6	5.1	0.1	7.7
0.1	0.1	0	1	0	0.1	0	18.94	0.1	0.3	0.2	0.6	0	0.1	4.1	0.1	6.7
0.3	0	0	0	0	0.1	0	15.3	0	0	0	7.3	0	0.1	1.4	0.1	4.4
0.3	0	0	0.1	0	0	0	5.3	0	1.5	1.2	0.15	0	0.1	0	0.1	0.3
0.1	0	0	0	0	0.1	0	6.4	0	0	0	0.1	0	0	0	0.1	0.1
0.2	0.1	0	0	0.1	0	0	3.8	0	0	0	7.3	0.1	0.1	0	0.1	0.1
0.2	0.1	0	0	1.1	0.1	0.1	0.1	0	0	0	12.8	2	0.1	0	0.1	0
1	0	0	0	0.1	0.1	0.1	0	0	0	0	1.7	6.3	6.19	0	0.1	0
0.3	0	0	0	0.6	0.2	0	0.1	0	0	0	1.3	9.9	10.63	0	3.5	0
0.1	0.1	0	0	0.1	0.9	0	0	0	0	0	0.1	0.2	1.1	0	0.1	0.1
0	0.1	0	0	0	0.5	0	0.1	0	0	0	0.1	0.9	0.1	0	0.1	0.1
0	0	0	0	0	0.1	0	0	0	0	0	0.1	0	0.1	0	0	0.1
0	0	0	0	0	0	0.1	0	0	0.3	0.2	0.7	0	0.1	0	0	0.1
0	0	0	0	0	0.1	0.1	0	0	0	0	1.4	0	0.1	0	0	0
0	0.1	0.87	0.1	0	0.1	0.1	0	0.1	5.83	5.7	0.1	0	0.1	0	0	0
0.3	0.1	0	0.1	0.1	0.1	0	0	0	0.1	0.1	0.1	0.1	0.7	0	0.1	0
0.2	0.1	0	0	0.1	0.1	0	0	0	0.1	0.1	0.1	0.9	0.1	0	0.1	0
0.1	0.1	0	0	0.1	0.6	0	0.1	0	0	0	0.1	0.6	0.1	0	0.1	0.5
0.1	0.1	0	0	0.1	0.46	0	0.1	0	0	0	0.1	1.6	1.2	0	0.1	0
0.1	0	0	0	0.1	0.1	0	0	0	0	0	0.1	8	1.5	0	0.1	0
0.3	0	0	0	0	0	0	0	0	0	0	0.1	2.7	0.1	0	0.1	0
0.1	0.1	0	0.1	0.1	0	0	0	0	0	0	0.1	0	0.1	0	0.1	0
0.1	0.1	0	0	0	0	0	0	0	0	0	0.1	0	0.1	0	0.1	0
0.1	0	0	0.1	0	0	0	0	0	0	0	3.6	0.1	0.1	0	0	0.1
0.1	0	0	0	0	0.1	0	0	0	0	0	3.3	0	2.8	0.1	0	0.1
0.1	0.1	0	0.1	0	0	0	0	0	0.6	0.4	8.3	0	0.1	0	0	0
0.1	0	0	0.1	0	0.1	0	0.1	0	0.1	0.1	9.98	0	0.1	0.1	0	0
0.1	0	0	0	0	0.1	0.1	0.1	0	0	0	3.1	0	0.1	0.1	0	0
1.2	0	0	0	0	0	0	0.1	0	0	0	0.1	0	0.1	0	0	0
0.1	0	0.1	0	0	0.8	0	0.1	0	0	0	0.1	0	0	0.1	0.1	0.1
0.1	0	0	0	0	0.1	0	1.9	0	0	0	0.2	0	0	0	0.1	0.2
0.5	0	0	0	0	0.1	0	5.9	0	0	0	0.1	0	0	0	0.1	5
0.2	0	0	0	0	0	0	17.27	0	0	0	0.3	0	0.1	0.1	0.1	7.24
2.4	0	0	0	0	0.1	0	17.7	0	0.1	0.1	2	0	0.1	7.54	0.1	6.8
43.06	0.1	0	0	0	0.1	0.1	14.8	0	0	0	0.1	0.1	1.8	2.4	0.1	21.25
2.6	0	0.1	0	0	5.5	0.1	13.5	0	0.1	0.1	0.2	2.2	75.27	1.7	26.06	8.6
3.2	0.1	0.1	0	3.5	0.1	0.1	0.1	0.1	0.1	0.1	0.5	32.54	4.86	4.2	0.1	0.2
0.1	0	0.1	0	0.1	1	6.08	4.5	0	0.1	0.1	5.1	0.1	0.1	0.1	0.1	0.1
0.1	0.1	1.3	0.1	0	0.5	35.99	5.8	0.1	0.3	0.3	1.3	0.1	0	0.1	0.1	0.7
0.1	0.1	0	0.1	0	0.1	4.2	0.1	0.1	0.4	0.3	26.67	0.1	0	0.1	0.1	0.1
0.1	0.1	0	0.3	0	0	1	0.1	0	10.96	11.59	12.54	0.1	0	0	0.1	0
0.1	0.1	0	73.17	0.1	0	1.4	0.1	0	95.74	101.09	19.43	0.1	0	0	0.1	0.1
0.2	6	0.53	17.79	7.5	0.1	7.3	0.1	0.1	0.1	0.1	0.2	0.7	0.1	0	0.1	0
0.2	0.1	2.6	2.4	0.1	0.5	6.85	0.3	0.1	22.55	23.92	0	0.7	0.1	0.1	0.1	0.1
1.7	0.1	0.1	8.78	0.1	0.1	6.7	0	0.2	30.3	35.72	0.1	0.9	0.1	0	0.1	0.1
0.8	0.1	0	0	0	0.1	0.5	0.1	0.1	0	0	0	0.8	0.1	0	0.1	0.1
0.5	0.1	0	0	0	0.2	1.9	0.1	0	0	0	0.1	0.1	0.1	0	0.1	0.1
1.8	0.1	0	0.1	0	0.1	0.8	0	0	0.1	0.1	8	0.1	0.1	0.1	0.1	0.1
0.9	0	0	0.1	0	0.2	0.1	0	0	0.1	0.1	3.7	0.1	22.35	0	0.1	0.1
2.4	0.1	0	0	0.1	0.1	0.1	0.1	0	0	0	2.6	0.8	1.6	4.1	4.8	0
9.15	0	0	0	0	0.1	0.1	1.2	0	0	0	9.2	0.1	0.1	1.5	1.9	0.1
6.55	0	5.6	0	0	0.6	0.1	0.3	0	0	0	26.38	0.1	2.2	4.2	0.1	0.1
5.4	0	0.3	0	0	0.1	0.6	0.4	0	0	0	37.28	0.1	4.96	7.75	0.1	2.6
0.4	0	8.6	0	0.1	1.7	0.65	0.7	0.1	0	0	16.44	0.1	0.2	1.4	0.1	0.2
0.1	0.1	0	0	0.1	13.51	0.1	10.7	0.1	0	0	3.99	0.1	0.1	2.1	0.1	40.37
1.1	0.1	2.8	0	0.1	13.9	0.1	6.2	4.4	0.1	0.1	7.6	0.1	0.1	0.1	0.1	80.3
8.7	0	20.58	0	0	35.4	0.1	20.81	6.4	0	0	11.95	0.1	0.1	0.5	0.1	21.34
1.7	0	7.03	0	0	18.7	0.1	24.74	2.8	0	0	21.3	0.1	0.1	12.3	0.1	4.9
1	0	14.8	0.1	0	0.1	2.85	16.81	0.1	0.1	0.1	1.84	0.1	0	6.2	0.1	49.68
0.2	0.1	0.1	0.1	0	6.1	0.5	21.38	0.1	0.1	0.1	4.3	0.1	0	0.2	0.1	25.99
0.1	0.1	0.1	0	0.1	45.6	0.1	9.06	2.4	0.1	0.1	0.9	0.1	0.1	3.5	0.1	9.4
0.1	0.1	0.1	0	2.5	65.37	1.83	8.89	0.8	0	0	0.1	0.1	3.6	3.5	0.1	3.6
0.8	6.55	0.7	0.1	15.34	12.77	1.6	0.4	0.59	0.1	0.1	0.1	0.1	1.2	0.1	0.1	0.1
0.1	15.62	0	25.95	15.69	0.1	0.1	0.1	0.1	3.3	2.9	0.1	1.2	23.32	0.1	0.1	0.1
0.5	8.63	0.8	2.2	14.18	20.22	0.4	3.2	0.1	0.1	0.1	0.1	1.41	19.3	2.1	8.1	2
1.2	0.1	0	0	86.19	14.87	0.1	1	0.1	3.68	3.35	0.1	23.87	16.41	0.1	0.2	0.5
0.4	0.1	0.1	0	124.14	4.84	12.7	5.32	0.1	0.1	0.1	0.1	88.52	10.1	0.1	2.6	3.44
0.4	4.87	0.1	0	19.17	0.1	48.28	6.55	0.1	1.6	1.3	1.5	11.35	0.1	4.6	0.1	1
0.3	4.31	0.2	2.6	0.2	0.1	45.83	15.85	1.02	8.6	8.72	28.02	1.2	0.1	1.4	0.1	0.4
0.1	0.1	0.1	1.6	0.1	0.1	0.6	3.7	0.1	1.7	1.3	55.36	0.1	0.1	9.1	0.1	1.3
0.1	0	16.1	0	0.1	0.1	1.2	6.4	0	0	0	68.61	0.1	0.1	26.3	0.1	0.6
0.5	0	0.2	0	0.1	0	0.1	1	0	0	0	40.84	0.1	0.1	10.5	0.1	1.1
0.1	0	0	0	0.1	0	0.1	0.8	0	0	0	30.71	0.1	0.1	0.1	0.1	0.1
0.1	0	0	0	0.1	0	0.3	0.1	0	0	0	72.92	0.1	0.1	0.1	0.1	0.2
0.1	0	0	0	0.1	0	0.71	7	0	0	0	57.12	0.1	0.1	4.69	0.1	0.2
0.1	0	0.97	0	0.1	0.1	0.49	14.89	0	0	0	77.8	0.1	0.1	17.78	0.1	5.2
0.1	0	0.1	0	0.1	0.1	0.1	33.02	0	0	0	142.7	0.1	0.1	30.43	0.1	2.5
0.1	0	5.2	0	0.1	0	0.8	86.3	0	0	0	56.14	0.5	0.1	41.8	0.1	16.13
0.1	0	21.71	0	0.1	0	0.1	138.88	0	0	0	11.6	0.1	0.1	13.44	0.1	47.25
0.1	0	2.4	0	0.1	3.38	1.1	53.02	0.7	0	0	8.89	0.1	0.1	0.66	0.1	65.75
0.1	0	0.1	0	0.1	5.19	0.1	30.61	0.2	0	0	4.07	0.1	0.1	1.2	0.1	61.73
0.1	0	0.1	0	0.1	12.2	0.5	26.53	1.4	0	0	1.3	0.1	1.18	0.1	0.1	48.24
0.1	0.1	0.6	0	0	22.29	3.69	21.84	3	0	0	0.2	0.1	7.6	1.11	0.1	36.13
2.3	0.1	1	0.1	2.3	87.49	2.05	1	8.4	0.1	0.1	0.1	0.1	1.1	0.2	0.2	9.69
3.5	2.1	0.1	0.1	41.43	17.23	2.85	2	13.02	2.1	1.6	0.1	4.5	0.1	0.1	3.3	0.7
5.34	10.93	0.6	0.7	19.16	0.1	8.9	1.6	0.1	6.3	6	3.8	2.8	0.1	0.7	0.1	2.2
3.6	5.09	21.71	0.1	0.8	2.3	29.67	11.77	3.6	1.13	0.9	19.97	1	0.1	5.7	0.1	14.14
2.2	17.72	4.1	17.56	3.3	30.44	1.7	2	27.8	0.1	0.1	8	1.8	0.1	7	0.1	21.32
3.8	13.6	0.1	25.52	38.82	23.12	1.83	0.1	0.2	5.02	4.6	0.8	14.02	0.2	0.4	0.1	0.1
5.8	6.7	7.7	1.8	23.71	12.5	6.2	1.1	0.5	3	2.45	0.1	32.31	0.4	0.1	0.1	0.1
0.2	8.8	0.1	0	7.7	3.25	2.5	0.3	1.8	0.6	0.5	0.1	14.09	2.8	0.1	0.1	1.9
0.3	8.64	0.1	13.29	13.21	0.1	7.6	0.15	0.1	0.1	0.1	0.1	2.8	3.6	0.1	0.1	6.05
0.1	1.8	0	5.03	6.94	1.1	0.7	1.2	0.3	5.7	5.6	0.1	1.4	0.1	0.1	0.1	3.9
2.9	0.2	0.1	0.5	0.1	28.77	0.7	0.1	1.2	0.2	0.2	0.1	0.5	2	0.1	3.6	1.2
5.7	4.2	0	0	0.1	4.2	0.6	1	0.1	0.1	0.1	0.1	2.5	2.5	0.1	7.2	1.9
3.9	0.8	0	0	4.4	12.37	1	0.8	0.1	0	0	0.8	1.6	1.1	0.5	4.7	0.8
0.6	0.3	0.1	0	9.94	4.5	0.1	0.62	0.1	0	0	2.71	3.24	15.83	3.7	0.1	0.8
3.6	8.86	0.1	0.1	15.9	6.5	0.1	0.1	4.38	0.1	0.1	1.1	10.35	33.88	0.3	19.9	0.2
27.18	42.59	0.1	0.1	27.41	6.28	14.04	2.3	0.6	0.6	0.4	0.1	22.9	41.93	3.9	12.56	0.2
5.9	12.71	0.6	2.8	8.29	13.6	0.8	13.33	6	9.2	9.6	10.66	1.4	3.6	4.4	0.1	2
5.2	9.2	4.8	14	7.6	18.1	0.1	18.29	11.25	39.95	46.03	3.7	3.5	0.3	4.7	0.1	20.4
7.5	13.59	6.42	0.8	15.75	25.09	0.49	13.47	0.1	0.1	0.1	28.68	31.59	0.1	20.3	19.98	18.75
36.29	2.1	23.18	0	29.39	10.4	0.1	1.49	23.31	0.1	0.1	4.8	45.98	4.2	28.67	9.53	8.21
12.86	19.39	4.8	0	41.03	0.4	4.3	0.2	12.43	0.1	0.1	0.8	14.01	0.1	4.72	11.61	0.1
2.5	27.11	4	0.8	7.29	0.1	0.3	1.5	0.7	0.1	0.1	7.3	4.87	0.1	4.6	2.6	1.3
1.72	0.7	2.4	0	0.7	0.1	0.1	12.66	0.1	0.1	0.1	30.06	0.7	0.1	24.09	0.1	4.6
0.6	0.1	1.4	0	0.1	0.1	0.1	6.2	0.1	0	0	44.31	0.2	0.1	42.91	1.1	0.8
1.2	0	184.29	0	0.1	0.1	0.1	3.4	4.4	0	0	10.31	0.1	0.1	14.37	0.1	2.2
2.6	0	284.75	0	0.1	5.8	0.1	15.6	0.9	0	0	6.54	0.1	0.1	10.36	0.1	12.75
0.4	0	14.32	0	0.1	4.4	0.1	8.74	2	0	0	21.88	0.1	0.1	30.96	0.1	37.93
0.4	0	16	0	0.1	2.1	0.3	16.8	0.1	0	0	1.03	0.1	0.1	25.17	0.1	47.44
0.85	0	0.1	0	0.1	13.7	0.3	11.5	0	0	0	5.4	0.1	0.1	15.26	0.1	55.98
1.1	0.1	1	0	2.8	8.2	1.2	4.7	0	0	0	0.9	0.1	0.1	6.89	0.1	17.9
0.3	0.1	5.2	0	4.65	38.35	0.1	0.7	0	0	0	0.9	0.1	1.7	0.4	0.1	3.65
4.4	0.1	10.3	0	7	17	0.1	0.1	3.8	0	0	0.1	0.2	6	1.6	0.1	1.1
100.92	1.67	2.3	0.1	20.56	11.78	0.1	0.1	13.51	0.1	0.1	0.1	4.3	13.12	3	3.1	0.1
91.81	5.9	0.1	0	25.12	3.2	0.1	0.1	7.1	0	0	0.1	16.19	46.17	0.1	104.99	0.1
60.33	0.7	0	0	0.6	0.1	0.1	0.1	0	0	0	2.8	37.65	35.76	0.1	107.08	0.1
6.9	0.1	0.1	0.1	0.1	0.1	0.4	0.1	0.1	0	0	1.1	24.53	4.7	0.1	5.9	0.1
1.6	2.9	0.1	0	2.2	5.2	33.58	2.5	0.1	0	0	16.95	2.2	0.1	1.4	0.2	0.1
1.5	5.9	0.6	2.1	12.3	9.4	0.1	0.1	3.7	3.2	2.8	1.3	18.73	0.1	4.36	0.1	0.1
3.2	82.95	0.4	16.57	27	7.1	0.1	0.1	0.9	1.7	1.3	0.1	4.39	0.1	0.2	0.2	0.1
5.4	54.87	1.8	50.72	8.25	1	0.1	0.1	9.3	36.54	42.79	3.6	0.7	0.1	3	0.8	0.1
18	9.6	7	21.44	2.21	0.1	0.1	0.1	5.3	2.6	2.03	2.16	18.49	5.9	0.1	8	0.1
6.61	0.1	0.4	0	3.4	0.1	0.1	0.1	22.01	0	0	6.1	9.95	33.14	0.7	54.32	0.1
25.57	0.7	10.4	0.1	2.1	16.71	0.1	0.7	8.53	0.1	0.1	0.4	1.6	47.84	0.6	53.56	0.1
25.43	0.1	0.4	0.1	1.5	18.7	0.1	0.1	7.5	3.7	3.4	0.1	0.2	41.95	0.8	0.1	0.1
7.5	1.9	2.9	0	18.47	30.08	0.1	1.3	4.95	0.1	0.1	0.1	6.1	11.75	0.1	0.1	0.1
0.9	6.16	0.1	0	28.09	17.54	0.1	0.8	7.8	0.3	0.3	0.1	0.1	0.1	0.1	0.1	0.1
0.1	15.98	0.4	0.1	9.03	6.3	0.1	0.1	9.3	1.4	1	0.1	0.1	0.1	0.1	0.1	0.1
0.1	0.1	0.8	0.1	0.1	15.87	0.1	0.1	57.35	0.1	0.1	0.1	0.1	0.1	4	0.1	0.1
0.1	0	9.8	0	0	0.89	0.1	0.4	24.93	0	0	0.1	0	0	4.6	0.1	0.7
0.1	0	24.49	0	0	16.45	0.1	0.1	0.4	0	0	0.1	0	0.1	0.1	0.1	5.84
0.1	0.1	0	0	1.5	3.9	0.1	0.1	3.8	0	0	0.1	0.1	0.1	0.1	0.1	0.1
0.1	0.1	0	0	4	0.3	0	0.1	0	0	0	0.1	0.1	0.1	0.2	0.1	0.1
0.1	0.1	0.1	0	0	0.1	0	1.7	0	0	0	3.7	0	0.1	0.1	0.1	0.1
0.1	0	2	0	0	0.1	0	20.5	0	0	0	15.07	0	0.1	18.23	0.1	3.2
0.1	0	3.1	0	0	0	0	22.26	0	0	0	6.7	0	0.1	5	0.1	51.19
0.1	0	0	0	0	0	0.1	0.4	0	0	0	0.1	0	0.1	1.2	0.1	22.11
0.1	0	0.1	0	0	0.1	0	8.13	0	0	0	0.1	0	0.1	2	0.1	15.58
0.1	0	0.1	0	0	0	0.1	11.95	0	0	0	1.1	0	0	1	0.1	44.98
0.1	0	0	0	0	0	0.1	58.12	0	0	0	0.3	0	0	3.5	0.1	16.12
0.1	0	0	0	0	0	0	56.05	0	0	0	2.5	0	0	0.6	0.1	7.3
0	0	0	0	0	0	0	25.8	0	0	0	8.6	0	0	0.43	0.1	0.6
0	0	0	0	0	0	0	17.29	0	0	0	0.1	0	0.1	6.7	0	1.9
0.1	0	0.1	0	0	0	0	0.5	0	0	0	0.1	0.1	0	0.1	0.1	2.06
2.5	0	0	0	0	0	0	0.1	0	0	0	0.1	0	0	0.8	0	0.1
4.77	0	0	0	0	0	0	0	0	0	0	0.1	0	0	4.1	0.1	0.5
0.1	0	0	0	0	0	0	0.1	0	0	0	0.1	0	0	0.2	0.1	0.1
0.1	0	0	0	0	0	0	2.6	0	0	0	0.1	0	0	0.7	0.1	0.1
0.1	0	0	0	0	0	0	24.15	0	0	0	0.1	0	0	0.3	0	0.3
0.1	0	0	0	0	0.1	0	28.2	0	0	0	5.2	0	0	0.1	0	14.3
0.1	0	0.1	0	0	0.1	0	21.4	0	0	0	10.4	0	0.1	11.53	0.1	48.03
0.1	0	15.29	0	0	0.1	0	21.64	0.1	0	0	22.37	0	0	36.78	0.1	98.17
0.1	0	6.11	0	0	0.1	0	36.26	0.1	0	0	16.4	0	0	40.47	0	39.74
0.1	0	0.1	0	0	0	0	16.03	0	0	0	5.24	0	0	31.78	0	2.4
0	0	0	0	0	0	0.1	5.6	0	0	0	2.1	0	0	1.7	0	0
0.1	0	0	0	0	0	0	9.5	0	0	0	0	0	0	0.1	0.1	0.1
0	0	0	0	0	0	0	1.1	0	0	0	0	0	0	0	0.1	0.1
0.1	0	0	0	0	0	0	0	0	0	0	0.1	0	0	0.1	0	0.1
0.1	0.1	0	0	0	0.1	0	0	0	0	0	1.38	0	0	0.1	0	0
0.1	0	0	0	0	0	0	0	0	0	0	0.1	0	0	0	0	0
0	0	0	0	0	0	0	0.1	0	0	0	0.1	0	0	0	0	0
0.1	0	0	0	0	0	0	0	0	0	0	0.1	0	0	0	0	0
0.1	0	0	0	0	0	0	0.1	0	0	0	0	0	0	0	0	0
0.1	0	0	0	0	0	0	0.1	0	0	0	0	0	0	0	0	0
0.1	0	0	0	0	0	0	4.7	0	0	0	0.1	0	0	0	0	0.1
0.1	0	0	0	0	0	0	6.9	0	0	0	2.6	0	0	0.1	0	0.2
0.1	0	0	0	0	0	0	27.95	0	0	0	15.5	0	0	2.5	0.1	15.61
0.1	0	0	0	0	0.1	0	39.19	0	0	0	7.35	0	0	1	0.1	10.7
0	0	0	0	0	0.1	0	34.88	0	0	0	2	0	0	1	0.1	8.9
0.1	0	0	0	0	1.1	0	23.63	0	0	0	0.6	0.1	0.1	0.2	0.1	9.12
1.6	0	0	0	0.1	0.2	0	0.2	0	0	0	0.1	1.7	3.2	0	6.81	0.6
0.4	0	0	0	6.3	0.4	0.1	0.2	0	0	0	0.1	3.36	0	2.7	0.1	0.1
3.2	0	0	0	0.5	0.1	0	0.2	0	0	0	0.1	7.57	0.3	0.1	2.6	0
1.5	0	0	0	0.1	0.1	0.1	0.2	0	0	0	0.1	0.8	1.2	0.1	9.1	0.1
0.1	0	0	0	0	0.4	0.1	0.1	0	0	0	0.1	0.1	0.1	0.1	0.1	0.1
1.2	0	0	0	0	0	0.1	0.1	0	0	0	1.9	0.1	0.1	0.1	0.1	0.1
1.7	0	0	0	0	0	0	0.6	0	0	0	0.1	0.1	0.2	0.1	0.1	0.6
0.1	0.1	0	0.1	0	0	2.55	0.1	0	0.1	0.1	0.5	1.9	0.4	0.1	0.44	0.1
0.1	0	0	0	0	0	0	0.6	0	0	0	0.2	0.8	0.1	0	0.1	0.1
0.5	0	0	0	0	0	0	1.5	0	0	0	0.1	1.2	0.1	0	0.1	0
0.1	0	0	0	0	0.1	0	0.1	0	0	0	1.44	0.5	0.1	0	0.1	0
0.1	0	0	0.1	0	0	0.1	1.2	0	0	0	0.1	0.1	0	0.1	0.1	0
0.1	0.1	0	0.2	0.1	0.1	0.1	0.1	0	3.2	2.8	0.1	0.1	0.1	0	0.1	0.1
0.1	0.1	0	0	0.1	0.1	0	0	0	0	0	0.1	0.1	0	0.1	0	1.1
0	0.1	0	0	0.1	0	0	0	0	0	0	0.1	0.1	0	0.1	0.1	0.9
0.1	0	0	0	0	0	0	0.1	0	0	0	0	0	0	0.1	0.1	0.1
0.1	0	0	0	0	0	0	0	0	0	0	0	0	0	0	0.1	0
0.1	0	0	0	0	0	0	0	0	0	0	0	0	0	0	0.1	0
0.1	0	0	0	0	0	0	0	0	0	0	0	0	0	0	0.1	0
0	0	0	0	0	0	0	0	0	0	0	0	0	0	0	0	0
0	0	0	0	0	0	0	0	0	0	0	0	0	0	0	0	0
0	0	0	0	0	0	0	0	0	0.1	0.1	0	0	0	0	0	0
0	0	0	0	0	0	0	0	0	0	0	0	0	0	0	0	0
0	0.1	0	0	0	0	0	0	0	0	0	0	0	0	0	0	0
0	0	0	0	0	0	0	0	0	0	0	0	0	0	0	0	0
0	0	0	0	0	0	0	0.1	0	0	0	0	0	0	0	0	0
0	0	0	0	0	0	0	9.65	0	0	0	0	0	0	0	0	1.7
0	0	0	0	0	0	0	8.3	0	0	0	0	0	0	0	0	0.1
0.1	0	0	0	0	0	0	0.1	0	0	0	0	0	0	0	0	0.1
0.1	0	0	0	0.1	0.1	0	0.1	0	0	0	0	0	0.1	0	0	0.8
4.7	0	0.5	0	0.1	0.3	0	6.2	0.6	0	0	0.1	0	0.1	0	0.1	4.3
0.4	0.1	9.32	0	0	0.2	0	21.16	1.82	0	0	0.1	0.1	0	7.6	0.1	8.9
0.1	0.1	3.67	0	0.1	0	0	6.46	0	0.2	0.1	2	0.1	0	1	0.1	0.1
0.2	0.1	0.1	0.1	0.1	0	0	0.1	0.1	0	0	0	0.1	0	0.1	0.1	0.1
0.1	0	0	0	0	0.1	0	0.1	0	0	0	0.1	0.1	0	0.1	0.1	0
0	0	0	0	0	0.1	0	0	0	0	0	0.1	0.1	0	0	0.1	0
0	0	0	0	0	0.1	0	0	0	0	0	0	0.1	0.1	0	0.1	0
0	0	0	0	0.1	0	0	0	0	0	0	0	0.1	0.1	0	0	0
0	0.1	0	0	0.1	0.1	0	0	0	0	0	0	0.3	0	0	0	0
0	0.1	0	0	0.1	0	0	0	0	0	0	0	0.1	0	0	0.1	0
0	0	0	0	0.1	0	0.1	0	0	0	0	0.1	0.5	0.1	0	0.1	0.1
0	0	0	0	0	0	0	0	0	0	0	0.1	0	0	0	0	0
0	0	0	0	0	0	0	0	0	0	0	0	0	0	0	0	0
0	0.1	0	0	0	0	0.1	0	0	0	0	0	0	0	0	0	0
0.1	0.1	0	0	0	0	0	0	0	0	0	0	0	0.1	0	0.1	0
0.1	0	0	0	0	0	0	0	0	0	0	0	0	0.1	0	0.1	0
0.1	0	0	0	0	0	0	0	0	0	0	0	0	0.1	0	0.1	0
0	0	0	0	0	0	0	0	0	0	0	0	0	0	0	0	0
0	0	0	0	0	0	0	0	0	0	0	0	0	0	0	0	0
0	0	0	0	0	0	0	0	0	0	0	0	0	0	0	0	0
0	0	0	0	0	0	0	0	0	0.1	0.1	0	0	0	0	0	0
0	0	0	0	0	0	0	0	0	0.1	0.1	0	0	0	0	0	0
0	0	0	0	0	0	0	0	0	0.1	0.1	0	0	0	0	0	0
0	0	0	0	0	0	0	0	0	0	0	0	0	0	0	0	0
0	0	0	0	0	0	0	0	0	0	0	0	0	0	0	0	0
0	0	0	0	0	0	0	0	0	0	0	0	0	0	0	0	0
0	0	0	0	0	0	0	0	0	0.1	0.1	0	0	0	0	0	0
0	0	0	0	0	0	0	0	0	0	0	0	0	0	0	0	0
0	0	0	0	0	0	0	0	0	0	0	0	0	0	0	0	0
0	0	0	0	0	0	0	0	0	0	0	0	0	0	0	0	0
0	0	0	0	0	0	0	0	0	0	0	0	0	0	0	0	0
0	0	0	0	0	0	0	0	0	0.1	0.1	0	0	0	0	0	0
0	0	0	0	0	0	0	0	0	0	0	0	0	0	0	0	0
0	0	0	0	0	0	0	0	0	0	0	0	0	0	0	0	0
0	0	0	0	0	0	0	0	0	0.1	0.1	0	0	0	0	0	0
0	0	0	0.1	0	0	0	0	0	0.1	0.1	0	0	0	0	0	0
0	0	0	0	0	0	0	0	0	0	0	0	0	0	0	0	0
0	0	0	0	0	0	0	0	0	0	0	0	0	0	0	0	0
0	0	0	0	0	0	0	0	0	0	0	0	0	0	0	0	0
0	0	0	0	0	0	0	0	0	0.1	0.1	0	0	0	0	0	0
0	0.1	0	0	0	0	0	0	0	0	0	0	0	0	0	0	0
0	0.1	0	0.1	0	0	0	0	0.1	0	0	0	0	0	0	0	0
0	0	0	0	0	0	0	0	0	0	0	0	0	0	0	0	0
0.1	0.1	0	0.8	0.1	0	0	0	0	0.1	0.1	0	0	0.1	0	0.1	0
0.1	0.1	0	9.2	0.1	0	0	0	0.1	0.1	0.1	0	0.1	0.1	0	0.1	0
0.1	0	4.52	0	0.1	5.7	0	0	3.1	0	0	0	0.1	0.1	0	0.1	0
0	0.1	0.7	0.6	0.1	0.1	0	0	0.1	0.1	0.1	0.1	0	0.1	0.1	0	0
0.1	0.1	0	0.4	0.1	0.1	0	0	0.1	0	0	0	0	0.1	0	0.1	0
0	0	0	0	0	0.1	0	0	0.1	0	0	0	0	0.1	0	0.1	0
0	0.1	0	0.1	0	0	0	0	0	0.1	0.1	0	0	0	0	0	0
0	0.1	0	7.2	0	0	0	0	0	3.73	3.4	0	0	0	0	0	0
0	0	0	54.67	0	0	0	0	0	20.54	22.69	0	0	0	0	0	0
0	0.1	0	24.26	0.1	0	0.1	0	0	7.5	7.25	0	0	0	0	0	0
0	0	0	0	0.1	0	0	0	0	0	0	0	0.1	0	0	0	0
0	0.1	0	0.1	0.1	0	0	0	0.1	0	0	0	0	0	0	0.1	0
0	0	0.6	0	0	0.1	0	0	0.1	0	0	0	0	0	0	0	0
0	0	0	0	0	0.1	0	0	0	0	0	0	0	0	0	0	0
0	0	0	0.1	0	0	0	0	0	0.1	0.1	0	0	0	0	0	0
0	0	0	0.1	0	0	0	0	0	0	0	0	0	0	0	0	0
0	0.1	0.1	0.1	0	0.1	0	0	0.1	0.1	0.1	0	0	0	0	0	0
0	0.1	1.5	0.1	0	0	0	0	2	0	0	0	0	0	0.1	0	0
0	0	0	0	0	0	0	0.1	0	0	0	0.1	0	0	0.1	0	0.1
0	0	0	0	0	0	0	0.4	0	0	0	0	0	0	0	0	0
0.1	0	0	0	0.1	0	0	0	0	0	0	0	0	0.1	0	0	0
0.1	0.2	0.1	0.1	5.5	0.1	0.1	0	0.2	0	0	0	1.7	0.1	0.1	0.1	0
0.1	0.1	14.61	0	21.7	1.9	0	0	19.73	0	0	0.1	1.2	0.1	0.1	0.1	0
0.1	0	0.1	0	0	0.1	0	0	0	0	0	0.1	0.1	0.6	0.1	0.1	0.1
0.1	0	0	0	0	0.9	0	0.4	0	0	0	0.1	0.1	11	0.1	0.1	3.2
0.1	0	0	0	0	0.1	0	0.3	0	0	0	0.45	0.1	0.62	0	0.1	2.4
0.1	0	0	0	0.1	0	0	0	0	0	0	0	0.1	5.3	0	0	0
0.1	0	0	0	0	0.1	0	0.1	0	0	0	0	0.1	0.1	0	0	0.1
0	0	0	0	0	0	0	0	0	0	0	0	0.1	0.1	0	0	0
0	0	0	0.1	0	0	0	0	0	0	0	0	0.1	0.1	0	0	0
0	0.1	0	2.5	0.1	0	0	0	0.1	0.1	0.1	0	0	0.1	0	0	0
0	0.1	0	0	0	0.1	0	0	0.1	0.1	0.1	0	0	0.1	0	0	0
0.1	0.1	0.1	0.1	0.1	3.1	0	0	0.6	0.1	0.1	0	0.1	0.1	0	0	0
0.1	0.2	30.04	22.99	0	17.43	0	0.6	14.1	5.9	5.7	0.3	0	17.41	9.4	0.1	2.6
0	0.1	8	0	0	0.1	0	0.1	0.1	0	0	10.1	0	0	20.96	0	9.39
0	0	0	0	0	0	0	0	0	0	0	0	0	0	0	0	0.1
0	0	0	0	0	0	0	0	0	0	0	0	0	0	0	0	0
0	0.1	0	0	0	0.6	0	0	0.1	0	0	0	0	0	0	0	0
0	0.1	5.4	0.1	0	0.1	0	6.3	0.7	0	0	0.1	0	0	0.7	0	13.9
0	0.1	0	0.12	0	0.1	0	10.47	0	0	0	0.1	0.1	0	0	0	4.3
0	0	0	0	0	0.3	0	7.9	0.1	0.1	0.1	0.1	0.1	0.1	0	0.1	9.2
0.1	0.1	1.7	0.1	0	3.9	0	5.55	0.1	0.1	0.1	0.1	0	0.1	0.1	0.1	14.34
0.1	0	0	0	0	0.1	0	8.4	0	0	0	1.3	0	0	0.1	0.1	7.27
0	0	0	0	0	0	0	2.7	0	0	0	0.1	0	0	0	0.1	0.1
0.1	0	0	0	0	0	0	0	0	0	0	0	0	0.1	0	0.1	0
0.1	0	0	0	0	0	0	0	0	0	0	0	0.1	0.3	0	0.1	0
0.1	0	0	0	0.1	0	0	0	0	0	0	0	0.1	0.1	0	0.1	0
0.1	2.92	0	5.6	1	0	0	0	0	0.2	0.2	0	0.1	0.1	0	0.1	0
0.1	0.1	5.8	5.58	0	0.1	0	0	4.25	0.1	0.1	0.1	0	0.1	1.7	0	0.1
0.1	0.1	0.1	0	0.1	0.1	0.1	5.7	0.1	0	0	0.1	0.1	0.1	0.1	0.1	1.2
0.1	0.1	0	0	0	0.1	0	1.49	0	0	0	0	0	0.1	0	0	0.2
0.1	0.1	0	0.1	0	0.1	0	0	0	0.1	0.1	0	0	0.7	0	0	0
0	0	0.1	0	0	0.6	0	0.1	0.1	0.1	0.1	0.1	0	0.1	0.1	0	0.2
0	0	0	0.1	0	0.1	0	0.1	0.1	0.1	0.1	0.1	0	0	0	0	0.8
0	0	0	0	0	0	0	0.4	0	0	0	0	0	0	0	0	0
0	0	0	0.1	0	0	0	0	0	0.1	0.1	0	0	0	0	0	0
0	0.1	0	0	0	0.1	0	0	0	0.1	0.1	0	0	0	0	0	0
0	0	0	0	0	0	0	0	0	0	0	0	0	0	0	0	0
0	0	0	0	0	0	0	0	0	0	0	0	0	0	0	0	0
0	0	0	0	0	0	0	0	0	0	0	0	0	0	0	0	0
0	0	0	0.2	0	0	0	0	0	0.1	0.1	0	0	0	0	0	0
0	0.1	0.1	1.3	0	0	0	0	0.1	1.6	1.3	0.1	0	0	0.1	0	0
0	0	0	0	0	0	0	0.1	0	0	0	0	0	0	0	0	0
0	0	0	0	0	0	0	0	0	0	0	0	0	0	0	0	0
0	0	0	0.1	0	0	0	0	0	0.1	0.1	0	0	0	0	0	0
0	0.1	0.1	0	0	0	0.1	0	0.1	0	0	0	0	0	0	0	0
0	0	0.1	0	0	0	0	3.8	0	0	0	0.1	0	0	0.1	0	0.1
0	0	0	0	0	0	0	4.7	0	0	0	0	0	0	0	0	0.1
0	0	0	0	0	0	0	0.1	0	0.1	0.1	0	0	0	0	0	0
0	0	0	0.1	0	0	0	0.8	0	0	0	0.1	0	0	0	0	0
0	0	0	0	0	0	0	0	0	0	0	0.1	0	0	0	0	0
0	0	0	0	0	0	0	0	0	0	0	0	0	0	0	0	0
0	0	0	0	0	0	0	0	0	0	0	0	0	0	0	0	0
0	0	0	0	0	0	0	0	0	0	0	0	0	0	0	0	0
0	0	0	0	0	0	0	0	0	0.1	0.1	0	0	0	0	0.1	0
0.1	0.1	0	0	0	0	0	0	0	0	0	0	0	0	0	0.1	0
0	0	0	0	0	0	0	0	0	0.1	0.1	0	0	0	0	0	0
0	0	0	0	0	0	0	0	0	0.2	0.2	0	0	0	0	0	0
0.1	0.1	0.1	0.1	0	0	0	0	0.1	0	0	0	0	0	0.1	0	0
0	0	0.1	0	0	0	0	0	0	0	0	0.1	0	0	0.4	0.1	0.8
0	0	0.4	0	0	0	0	17.64	0	0	0	2.76	0	0	1	0	3.22
0	0	6.9	0	0	0	0	0.9	0	0	0	32.74	0	0	4.73	0	1.3
0.1	0	0	0	0	0	0	0.9	0	0	0	0	0	0	0	0	0
0.1	0	0	0	0	0	0	0	0	0.1	0.1	0	0	0	0	0	0
0.1	0	0	0	0	0	0	0.1	0	0	0	0	0	0	0	0	0
0	0	0	0	0	0	0	0	0	0	0	0	0	0.1	0	0	0
0	0	0	0	0	0	0	0.1	0	0	0	0	0	0.1	0	0	0.1
0.1	0	0	0	0	0	0	0.4	0	0	0	0	0	0	0	0	0
0.1	0	0	0	0	0	0	0.1	0	0	0	0	0	0	0	0	0
0.1	0.1	0	0.1	0.1	0	0.1	0	0	0.1	0.1	0	0	0	0	0	0
0.1	0.1	0.1	0.4	0.1	0.1	0	0	0.1	0.1	0.1	0.1	0	0	0.1	0	0.1
0	0	0	0.1	0	0	0.1	0.1	0	0.1	0.1	0.1	0.1	0	0	0	0
0.1	0.1	0.1	4.7	0	0.1	0	0.1	0.1	5.1	4.67	0	0	0.1	0	0	0.1
0.1	0.1	0	1	0.1	0	0.1	0.1	0.1	2.3	1.8	0	0.1	0	0	0	0
0.1	0.6	0.1	25.82	0.1	0	0.1	0	0.1	26.81	30	0	0	0	0	0	0.1
0	0	0.1	0	0.1	0.1	0	3.4	0.1	0	0	0.1	0	0.1	0.1	0	2.7
0	0.3	0.1	0	0.1	0.1	0	6	0.1	0	0	0	0	0	0.1	0	0
0.1	0.1	0.1	0	0.1	0.1	0	19.27	0	0	0	0.1	0	0.1	0.5	0	0.1
0	0.1	0	1.4	0.1	0.1	0	15.26	0.1	0.1	0.1	0.12	0	0.1	0	0	0.1
0	0.1	3	0.1	0.1	0.1	0.1	2.4	0.1	0	0	3.4	0	0	4.3	0	9.4
0	0	0	0.1	0.1	0	0	18.4	0	0.1	0.1	38.97	0.1	0.1	4.7	0	11.74
0	0.1	0	0.1	0.1	0	0	0.6	0.1	0.1	0.1	0.1	0.1	2.9	0.1	0	0.1
0.1	0	0	0.1	0	0.6	0	0.7	0.1	0.1	0.1	0.1	0.1	1.8	0	0.1	4.3
0.1	0	1.8	0	0	0.1	0	8.4	0.1	0	0	8.4	0	0.1	2.7	0.1	3.2
0.1	0	0	0	0	0	0	0.3	0	0	0	6.5	0	0	5.3	0	3.8
0.1	0	0	0	0	0.1	0	0.4	0	0	0	0.1	0	0	0.9	0	0.1
0	0	0	0	0	0	0	0.1	0	0.1	0.1	0.1	0	0.1	0	0	0
0.1	0	0	0	0	0.1	0	0	0	0	0	0	0	0.1	0	0.1	0
0.1	0	0	0	0	0	0	0	0	0	0	0	0	0	0	0	0
0	0	0	0	0	0	0	0	0	0	0	0.1	0	0	0	0	0
0	0	0	0	0	0	0	0.1	0	0	0	0.1	0	0	0	0	0
0.1	0.1	0	0.1	0.1	0.1	0	0.1	0	0	0	2	0	0.1	0.1	0.1	0.1
0.1	0.1	0.1	0.1	0.1	0.1	0	0.8	0.6	0	0	4.9	0.1	0.1	0.1	0.1	0
0.4	0.1	0.1	0.1	0.4	0.1	0	5.3	0.7	0.2	0.2	14.93	0	7.01	0.1	0.1	7.65
0.1	0.1	0.1	0.3	0.1	4	0	10.84	0.1	0.1	0.1	9.17	0	5.08	0	0.1	8.93
0.2	0	0	0	0	0.1	0	10.07	0.1	0	0	5.2	0	0.5	0	0.1	7.7
0.1	0	0	0	0	0	0	0.1	0	0	0	0.1	0.1	0.1	0	0.1	0.1
0.1	0	0	0	0	0	0	0.1	0	0	0	0.1	0	0.1	0	0.1	0
0.1	0.1	0	0.1	0	0.1	0	0.1	0	0.1	0.1	0.5	0	0.1	0	0.1	0
0.1	0	3.3	0	0	0.1	0	0	0.1	0	0	0.1	0.1	0.1	0.1	0.1	0
0.1	0	0	0	0	0	0	0	0	0	0	0.1	0	0.1	0	0.1	0
0	0	0	0	0	0	0	0	0	0	0	0.1	0	0.1	0	0	0
0	0.1	0	0.1	0	0.1	0	0	0	0.8	0.6	0.1	0	0.1	0	0.1	0.1
0	0.1	0.1	0	0	0.1	0	0.1	0.1	0	0	0.1	0	0.1	0	0	0.1
0.1	0	3.1	0	0	0.1	0	4.6	5.1	0.1	0.1	0.1	0	0	1.4	0	0.1
0.1	0	1.9	0	0	0.1	0	17.24	0.1	0	0	4.1	0	0	5.8	0	0.4
0	0.1	0	0.5	0	0.1	0.1	1.9	0	2.2	1.7	2.2	0	0	0	0	0
0	0.4	0	1.8	0.1	0.1	0.1	0.4	0.6	0.2	0.2	1.6	0	0	0	0	0.1
0.1	0.9	11.21	0.1	0.2	0.1	0.1	1	0.6	0.1	0.1	4.4	0	0.1	0.4	0	0.7
0.1	0.1	0.1	0	0.9	0.1	0	23.17	0.1	0	0	4.7	0.1	0.1	0	0	8.6
0.1	0	0	0	0	0.1	0	8.4	0	0	0	0.1	0.5	0.2	0	0.1	2.4
0.1	0	0	0	0.1	0.1	0	1.49	0	0	0	1.6	0.1	0.1	0.1	0.1	0.2
0.1	0	0	0	0	0	0	1.7	0	0	0	4.07	0	0.4	0.1	0.1	0.1
0.1	0	0	0	0	0	0	0	0	0	0	3.38	0.1	0.1	0	0.1	0
0.1	0.1	0	0	0	0.1	0	0	0	0	0	5.3	0.1	0.1	0	0.1	0
0.1	0	0	0	0.1	0	0	0	0	0.1	0.1	1	0.1	0.3	0	0.1	0
0.1	0	0	0	0	0.1	0	0	0	0	0	1.8	0	0.3	0	0.1	0
0.1	0	0	0	0	0	0.1	0	0	0	0	0.4	0	0.1	0	0.1	0
0.1	0	0	0	0	0	0.1	0	0	0	0	0.1	0	0.1	0	0	0
0.1	0	0	0	0	0	0.1	0	0	0	0	0.1	0	0.1	0	0	0
0.1	0	0	0	0	0	0	0	0	0	0	0.1	0	0.1	0	0.1	0
0.1	0	0	0	0	0	0	0	0	2.4	1.97	7.1	0	0.1	0	0.1	0
0.1	0.1	0	8.4	0	0.1	0.1	0	0.2	6.5	6.1	9.29	0	0.1	0	0	0.1
0	0.1	3.1	0	0	0	0	0	0.1	0	0	14.67	0	0.1	0.1	0	0.1
0.1	0.1	0	0	0	0.1	0	0.1	0	0.1	0.1	5.38	0	0.1	0	0.1	0.1
0.1	0	0.1	0.1	0	0.1	0.1	0.1	0.1	2.8	2.3	12.5	0	0.1	0	0.1	0
0.3	0	0.1	1.3	0	0	0.1	0	0.1	0.1	0.1	19.87	0.1	0.1	2.9	0.1	0.2
0.1	0	13.5	0	0.1	0.9	0	1.49	0.4	0	0	3	0	0.6	0.1	0.1	0.1
0.1	0	3	0	0	0.1	0	20.82	0	0	0	39.79	0.1	5.9	30.56	0.1	21.54
0.1	0	0	0	0	0	0	8.8	0	0	0	0	0	0.1	0	0.1	3.1
0.1	0	0	0	0	0	0	0.1	0	0	0	0.7	0	0	0	0.1	0.4
0.1	0.1	0	0	0.1	0	0	0.1	0	0	0	9.69	0	0.1	0	0.1	0.1
0.1	0	0	0	0.1	0.1	0.1	3.1	0	0	0	5.1	0	1.4	0.1	0.47	0.1
0.7	0.1	0	0	0	0.1	0.1	0	0	0	0	14.94	0	0.1	0.9	1.1	0.1
0.1	0.1	0.1	0	0.1	0.9	0.1	3.9	0.1	0	0	30.89	0	15.7	0.1	3	1.6
0.8	0.1	1	0	2.5	2.8	0.1	20.63	0.1	0	0	44.24	0.1	4.86	12.7	0.9	5.6
0.1	0.1	0	0	0.1	1.9	0.1	3	0.1	0	0	109.22	0	10.71	19.12	0.1	2.1
0.1	0.1	0	0	0.6	0.1	0.1	0.1	0	0	0	14.7	0.5	29.27	5.55	1.6	0.1
0.8	0.1	0.4	0	0.1	0	0.1	0	0	0	0	5.6	3.1	0.4	0.1	21.58	0.4
0.4	0.1	0	0	0.1	0.1	0	4.2	0	0	0	16.19	0.1	0	0.1	0.1	2.5
0.1	0.1	0	0	1.5	1.3	0	0.1	0	0	0	17	0.2	0.1	0.1	0.1	1.6
0.1	0.1	0.1	0	0.1	0.1	2.2	0.1	0	0	0	21.82	0.1	11	0.1	0.2	0.5
1.1	0	0	0	0.1	0.1	0.1	0.1	0.1	0	0	0.3	8.1	21.68	0.1	0.1	3.7
64.83	0.1	0.1	0	5.4	1.6	0.1	8.4	0.1	0	0	1.1	4.3	6.2	0.3	59.19	6.9
261.63	0	12.5	0.1	0.2	1.8	0.1	9.5	0.1	0	0	3	0.1	15.8	14.41	55.78	30.13
119.9	0	19.81	0	0.1	6.26	0.1	21.46	0	0.1	0.1	34.85	3	13.09	49.71	64.79	55.98
59.78	0	46.51	0	0.1	0.1	0.1	43.17	0	0	0	68.53	0.1	0.9	102.58	0.1	53.77
2.5	0	0	0	0	0.19	0.1	27.29	0	0	0	126.9	0.1	0.1	50.44	0.1	1.9
1	0	0	0	0	0.1	0.1	2.8	0	0	0	36.18	0	0.1	1.8	0.1	5.26
0.1	0	0	0	0	0.5	0.1	14.39	0	0	0	29.79	0	0.1	5.8	0.1	5.22
0.8	0.1	0	0	1.4	1.2	0.1	27.99	0	0	0	0.3	0.2	2.4	0.1	0.1	9.18
0.6	0.1	0.1	0.1	0.1	0.9	0.1	6.87	0	0.1	0.1	0.1	0.1	0.1	1.1	0.1	3.73
15.32	0.1	1.5	0	0	2.3	0.1	18.8	0.5	0.1	0.1	1.1	0.1	0.1	0.3	1.9	0.6
9.9	0	0.4	0	1.9	7.13	0.1	30.98	0.3	0	0	0.9	0.1	0.1	0.1	0.2	17.63
2	0	1	0	2.6	0.1	2.85	29.72	0	0	0	9.8	0.1	0.7	11.3	0.1	72
4.48	0	31.09	0	5	64.97	0.1	0.4	4.2	0	0	0.1	0.1	0.8	6.3	0.2	44.62
8.8	0.1	1.6	0	70.22	25.97	0.1	0.1	7.76	0	0	0.1	74.87	33.1	0.1	100.84	0.1
50.72	0.8	0	1.53	16.32	2.4	83.36	0.2	0	0.1	0.1	0.1	49.35	24.29	0.1	121.19	0.1
19.27	0.1	0	0	0.1	0.1	14.8	0.1	0	0.1	0.1	0.1	1	0.1	0	14.52	0
1.7	0	0	0	0.1	0.1	0.7	0	0	0.1	0.1	0.1	11.47	1.7	4.7	6.1	0.1
0.1	0	17.48	0	0	0.1	19.75	0.8	0.1	1.5	1.1	71.34	0.2	0.1	69.31	0.1	1.8
0.1	0	1.6	0	0	0	0.1	25.48	0	0.1	0.1	271.42	0.1	0.1	133.66	0.5	13.9
3	0	0	0	0.1	0	0.1	7	0	0.1	0.1	208.08	0.1	0.1	12.06	0.1	0.1
1.1	0	0	0	0	0.1	0.1	0	0.1	0	0	54.27	0.1	0.1	4.74	0.1	0.1
4.4	0.1	13.9	0.1	0	3.69	0.1	0.1	0	0	0	53.96	0.1	2.1	33.96	0.1	0.1
25.25	0	5.5	0.1	0	0.1	0.1	2.1	1.9	0.1	0.1	19.19	0.6	24.37	36.67	11.56	0
11.2	0.1	10.9	0	6.75	4.51	0.1	0.1	4.6	0.1	0.1	0.7	2.2	10.69	1.5	0.1	0.1
5.3	0.2	15.95	0	4.1	6.2	0.1	0.1	2.1	0	0	5.22	26.11	13.07	11.56	6.17	0.1
27.01	9.6	11.86	2.8	14.85	0.1	32.4	0.1	6.62	0.2	0.2	0.1	0.9	3.1	0.66	9.99	0.1
44.57	32.47	10.5	1.5	49.95	8.82	1.7	0.1	8.8	0.1	0.1	0.5	0.1	1	0.1	0.3	0
28.58	33.64	2.3	0.1	35.52	3.7	1.83	0.1	2.7	1.5	1.1	0.1	8.1	15.49	0.2	0.6	0
22.31	8.93	0.1	0	1.8	1.1	112.86	0.1	0.4	0	0	0.1	1.5	13.06	0.1	5.05	0.1
5.4	0.1	0	0.1	1.5	0.8	64.68	0.1	0.1	0	0	0.1	3.4	9.05	0	8.4	0.4
0.6	0.12	0	0	10.42	8.9	32.54	0.1	0	3.1	2.6	0.1	22.35	23.43	0	10	1.5
2	0	0	5.51	97.06	21.05	16.91	1.4	0.1	8.5	8.37	0.1	48.34	22.14	0.1	0.9	5
0.6	0.1	0.1	0.1	168.11	0.3	3.7	5.7	0.9	12.91	14.41	0.1	124.56	3.4	0.1	3.3	13.72
5.78	12.02	0.1	0	96.44	0.2	2.4	26.7	0.1	0.1	0.1	18.2	45.08	9.25	0.3	0.2	24.59
0.1	0.2	3	1.53	55.96	18.51	1.37	15.8	0.1	10.02	10.38	11.04	0.13	3	15.12	0.1	15.6
0.1	15.11	16.1	0	30.03	9.4	0.3	0.2	27.77	0.1	0.1	2	2	0.8	2	0.6	4.7
0.6	76.16	3	1.4	14.35	0.5	0.4	0.1	0.7	0.9	0.7	1.2	0.5	0.1	0.1	1.1	1.9
2.6	1.8	1.4	0.1	8.3	0.8	1.1	1.4	0	0.1	0.1	3.3	5.6	0.1	2.4	0.1	5.8
2.2	0.1	1.3	0.1	0.2	0.2	1.1	9.1	0.1	0.1	0.1	18.9	0.2	0.1	17.85	0.1	11.52
37.49	0.2	43.51	1.2	0.1	5.8	0.5	18.46	18.16	0.1	0.1	6.2	0.1	0.17	3.6	1.4	24.5
14.23	51.3	11.89	0.1	16.8	12.77	0.7	0.9	46.88	13.17	14.86	1.6	1	3.6	6.29	12.2	7.5
6.4	33.66	20	0.3	7.3	0.5	0.3	0.1	16.41	20.79	22.9	2.4	8.1	2.7	0.3	3	0.3
2.2	16.62	17.3	0.1	5	0.1	11.46	0.1	8.3	1.1	0.9	0.4	6.2	3.2	0.5	4.7	0.1
6.9	11.9	2.1	0.1	14.64	2.4	19.4	0.1	6.8	0	0	0.72	2.2	5.3	0.3	0.1	0.1
2.4	1.5	21.66	4.7	2.22	2.6	2.2	0.1	13.8	12.9	14.4	6.45	2.3	0.5	0.1	6	1.7
1.5	3.8	23.07	0.1	0.1	6.6	0.1	0.1	12.38	11.33	12.13	13.23	0.8	4.9	14.89	1.1	4.62
1.4	0.1	19.91	0	6.9	7.17	0.1	0.1	10.69	0.1	0.1	18.3	2	42.28	14.8	2.5	3.8
6.03	0	37.78	0	3.3	2.4	0.1	0	3.4	0.1	0.1	3.8	47.73	14.88	11	17.49	0.1
11.37	0	17.23	0	1.9	0.9	0.1	0	4.98	0	0	1.2	3.37	2.6	4.7	2.7	0.1
4.91	0.1	3	0	0.1	0.1	0	0	0.75	0	0	16.48	8.31	0.8	17.41	51.18	0.1
3.2	0.1	15.8	0	0.1	0.1	0	0	0.1	0	0	35.69	1	0.4	20.42	0.2	0.1
13.77	0	11.51	0	0.1	0.1	0.1	0	0	0	0	46.21	0.1	0.1	51.66	0.2	5.8
4.2	0	7	0	0	0.1	0.1	6.4	0	0	0	35.3	0.1	0.2	162.77	0.1	7.7
4.8	0	0.97	0	0	0	0.2	34.08	0	0	0	35.74	0.1	0.1	90.38	0.1	4.7
8.82	0	5.1	0	0.1	0.1	0.8	6.49	0.1	0	0	2.78	0.1	0.1	36.87	0.1	30.16
10.87	0.1	19.52	0	0.1	38.82	0.1	0.5	10.95	0.1	0.1	0.1	0.1	1.2	0.5	0.1	1.6
2.3	10.03	0	0.1	39.25	7.12	1.68	3.3	0.2	0.1	0.1	0.1	10.72	1.1	0.1	0.1	3.1
2.2	19.3	0.8	0	27.47	18.1	0.1	0.2	1	0.1	0.1	0.1	6.1	0.1	0.1	2.8	2.08
11.96	6.7	0.1	0.4	9.3	0.4	0.1	9.54	2.3	0.1	0.1	6.1	2.9	0.1	15.7	9.7	2
3.4	2	5.8	0	4.9	1.4	1.3	13.29	3.8	0.1	0.1	5.69	3.51	4.38	26.44	4.6	8.8
4.5	9.6	12.33	0.1	16.91	5.8	0.1	2.54	9.74	0.1	0.1	0.1	18.69	22.69	4.01	5.2	5.9
3	1.7	0.1	0	9.2	0.1	33.59	0.1	2.8	0	0	0.1	18.96	16.12	0.1	1.9	0.1
0.7	0.4	0.1	0.1	0.9	2.1	2.9	0.5	6.8	0.1	0.1	5.49	13.79	11	0.2	0.2	0.2
0.1	8.8	0	0.1	6.3	24.36	0.2	0.4	13.66	0.1	0.1	15.2	5.3	3.2	10.49	0.1	0.5
0.1	0.1	26.89	0.1	6.8	32.38	0.1	0.3	16.57	0.1	0.1	11.83	1.1	0.1	20.35	0.1	0.1
0.1	0.1	56.38	0	0.5	5.4	0.2	6	12.7	0	0	13.89	0.1	0.7	57.38	0.1	1.65
0.1	0	46.64	0	0.1	12.67	0.3	3.7	16.54	0	0	37.55	0.1	0.1	59.68	0.1	6.54
0.1	0	18.8	0	0.1	2.3	0.3	23.85	0.8	0	0	38.49	0.1	0.1	33.45	0.1	30.83
0.7	0	0.5	0	0.1	6	1	24.1	1.7	0.1	0.1	29.86	0.1	0.1	21.21	0.1	12.15
1.2	0	2.1	0	0.1	24.19	2.34	0.8	0.75	0.1	0.1	5.1	0.1	31	12.19	0.1	9.6
0.1	0.1	19.87	0	0.1	51.46	0.1	7.42	12.7	0.1	0.1	2.1	0.8	39.08	9.19	0.4	7.5
0.5	5.74	24.43	2.6	5.6	24.03	1	20.9	28.92	0	0	1.8	0.1	0.7	0.1	0.1	5.5
0.9	7.8	0.1	0.1	12.41	33.33	2.05	2.6	0.1	0	0	0.1	0.1	2.3	0.1	0.1	20.59
3.7	11.29	0	0.1	49.09	13.1	1.4	0.1	0.1	0	0	0.1	49.08	44.75	0.1	2.1	2.7
2.48	0.1	0.1	0	15.6	18.63	0.1	0.1	0.1	0.1	0.1	0.1	144.98	4.8	0.1	53.66	0.6
1.6	6	4	0	35.27	0.1	14.07	0.1	4.3	0.1	0.1	0	32.01	0.1	0.1	9.25	0.4
1.7	0.1	0.4	2.7	0.1	0.1	0.3	0.1	0.4	0.2	0.2	0.1	0.7	0.1	0.1	3.3	0.1
0.9	0.1	2.5	0.1	0.1	0.1	2.4	0.1	0.1	0.1	0.1	0.53	1.2	0.1	16.54	1.55	0.7
0.3	0.1	11.4	0.1	0.1	3.4	3.2	0	2.4	0.1	0.1	0.1	0.5	11.61	0.1	0.6	0.1
44.68	0.1	3.3	6.5	0.4	5.1	0.1	0.1	1.1	0.1	0.1	0.1	2.8	23.65	0.1	40	0.1
38.61	4.81	0.97	5.59	0.1	0.1	0	0.1	0.1	0.4	0.3	8.94	17.97	6.4	0.1	35.21	0.1
5.1	3.31	10.3	0.1	4.1	0.1	0.1	7.9	6.1	0.4	0.35	12.85	3.71	1.8	32.83	1.8	0.1
2.9	0.1	24.39	0	7.13	0.2	0.1	0.1	2.5	0.1	0.1	17.17	0.9	0.3	29.66	1.7	0.1
0.1	0.1	18.87	0	2.8	0.4	0.1	0.1	2.3	0.1	0.1	34.87	4.3	3.67	4.9	2.2	0.6
0.1	0.1	4	0	4.5	0.3	0.1	4.1	0.1	0.1	0.1	49.52	1	7.77	7.31	0.1	1.9
0.6	0	0.1	0	1.92	3.9	0.1	5	0	0	0	43.09	0.7	6.8	7.91	1.3	1.1
0.7	0	0	0	0.1	0.1	0.1	0.6	0	0	0	38.35	0.1	3.02	8.5	0.1	2.5
6.87	0.1	0.1	0	0.1	4.4	0.1	0.1	0	0	0	4.4	5.4	11.47	9.8	4.1	0.1
1.96	0.1	16.1	0	16	0.1	0.9	0	0.1	0	0	0.5	32.26	2.6	5.3	6.61	0
0.6	0.5	0.4	0	0.1	0.1	12.5	0	0.5	0	0	2.8	0.1	0.1	6.75	0.1	0.4
0.1	0.1	6.5	0	0.1	1.9	0.1	0	0.6	0	0	12.06	0.1	0.1	13.3	0.1	1.4
0.5	0.1	2.62	0	0.1	0.1	0	0	0.1	0	0	45.89	0.1	0.1	24.15	0.1	0.6
1	0	0.1	0	0.1	1.8	0	5	0.1	0	0	359.59	0.5	0.1	8.3	0.4	1.8
6.7	0	0.1	0	0.1	0.6	0	7.6	0	0.1	0.1	41.91	0.6	0.1	13.8	0.1	0.74
5.28	0	0	0	0.1	3.4	0	32.51	0	0	0	0.1	0.1	0.4	6.6	1.7	26.75
0.1	0	0	0	0.1	0.6	0	14.03	0	0	0	0.1	0.2	11.51	0.43	5.2	12.29
2.1	0.1	0	0	0	0.1	0	0.5	0	0	0	0.1	1.4	1.5	0	3.2	0.8
0.9	0	2.9	0	0.1	0.1	0	6.4	2	0	0	1.33	0.1	4.25	2	0.1	0.9
10.3	0.1	2.8	0	1.8	0.1	0	17.27	1.2	0	0	15.58	0.1	12.03	5.1	2.1	2.3
261.17	2.8	0.5	0	0.1	0.9	0	17.75	1.02	0	0	0.2	4.2	0.1	6	3.4	9.28
255.89	0.3	0.4	0	0.3	1.8	0.1	14.63	0.1	0	0	2.6	0.1	5	2.4	23.57	10.49
16.01	0.1	0.1	0	0.5	0.1	0.1	30.82	0	0	0	0.1	0.1	3.9	0.1	0.1	8.99
18.25	0.1	0.8	0	6.3	1.7	0	13.23	0.1	0	0	0.1	0.7	31.76	0.6	0.1	9
1.2	1.3	3.1	0	6.99	6.5	48.38	11.87	1.7	3.8	3.5	0	0.1	5.65	0.1	0.5	3.7
0.1	3.83	0.6	1.1	5.8	9.7	252.22	2.7	5.9	0.1	0.1	0	0.1	0.3	0	0.1	0.1
0.1	12.39	3	82.86	2.1	4.2	259.38	0.4	13.72	11.53	12.3	0.1	0.6	0.1	0.9	0.1	0.1
0.1	2.2	21.15	135.71	0.1	0.1	181.18	0.1	16.2	108.5	127.75	0.1	0.58	0.1	3	0.1	0.1
0.1	10.2	1	118.96	6.9	1.75	1	2.2	3.7	135.25	201.05	0.1	12.07	0.1	0.1	1.73	0.35
0.1	0.1	17.99	0	0.1	0.1	0.4	0.1	0.5	0	0	0.3	1.6	0.1	0.2	0.1	0.1
0.1	0.1	0.1	0	0.1	0.1	0.1	0.1	0.1	0	0	0.1	0.6	0.1	0.7	0.1	1.7
0.1	0.1	0	0	0.1	2.3	0.1	1.6	0.1	0	0	0	0.1	0.1	0	0.1	0.1
0.1	0	0	0	0	0.1	0	12	0	0	0	0.9	0.1	0.1	0.1	0.1	3.2
0.1	0.1	0.1	0	0.1	0.1	0	16.8	0.1	0	0	6.65	0.1	0.1	6.71	0.1	66.23
0.1	0.1	0.1	0	0.1	0.1	0	3.93	0.3	0	0	5.48	0.1	0.1	6.72	0.1	32.39
0.1	0	20.55	0	0.1	0.2	0	3.8	0.1	0	0	0.8	0.1	0.1	19.4	0.1	8.8
0.1	0	0	0	0	3.8	0	6.2	0.1	0	0	9.67	0.1	0.1	4.52	0.1	14.27
0.1	0	0.1	0	0	0.1	0	14.41	0	0	0	3.47	0	0	1	0.1	17.56
0.2	0	0	0	0	0.1	0	4.5	0	0	0	4.4	0	0	5.3	0.1	17.67
0.1	0	0.1	0	0	0.1	0	1.4	0	0	0	0.5	0.1	0	6.1	0.1	12.9
0.1	0	0.1	0	0	0	0	0.2	0	0	0	0.1	0	0	2.4	0.1	0.8
0.1	0	6	0	0	0.1	0	4.2	0	0	0	0.1	0	0.1	0	0.1	0.1
0.3	0.1	0	0.1	0	0	0	0.8	0	0.1	0.1	8.2	0	0	0.1	0	1.9
0.8	0	0	0	0	0.1	0	2.9	0	0	0	0.1	0	0	0.1	0.1	3.4
0.1	0	0	0	0	0	0	2.8	0	0	0	0.9	0.1	0	0.1	0.1	0.1
0.1	0	0	0	0	0	0	3.7	0	0	0	1.8	0	0	0.1	0	0.69
9.1	0	0	0	0	0.1	0	4.44	0	0	0	1.7	0	0.3	0.8	0.1	5.3
5.07	0	0.1	0	0.1	1.5	0	2.2	0	0	0	2.8	0.1	4.2	0.6	0.1	5.3
0.2	0	0.1	0	0.1	5.8	0	0.2	0	0	0	0.1	0.2	0.1	7.3	0.1	1.7
0.1	0	0.1	0	0	0.1	0	0.1	0	0	0	0.1	0.1	0.5	0.1	0.1	0.2
1	0	0	0	0	0	0	0	0	0	0	0	0	0	0	0.1	0
0.1	0	0	0	0	0	0	0	0	0	0	0	0	0	0	0	0
0.8	0	0	0	0	0	0	8.27	0	0	0	0	0	0	0	0	0.3
6.19	0	0.1	0	0	0.1	0	35.59	0	0	0	3.3	0	0.1	2.1	0.1	25.52
41.03	0	0	0	0	0.1	0	53.06	0	0	0	15.91	0	0.3	11.01	0.1	17.94
0.1	0	0	0	0	0	0	13.47	0	0	0	41.19	0.1	0.1	0.1	0	0.1
0	0	0	0	0	0	0	24	0	0	0	14.51	0.1	0	0.1	0.1	0.1
0.1	0	0	0	0	0	0	11.3	0	0	0	6.2	0	0	0.1	0.1	0.1
0.1	0	0	0	0	0	0	3.3	0	0	0	0.1	0	0	0	0	0
0	0	0	0	0	0	0	16.78	0	0	0	0.1	0	0	0.1	0	0.9
0.1	0	0	0	0	0	0	12.6	0	0	0	0.1	0	0	0.1	0	3.2
0	0	0	0	0	0	0	25.47	0	0	0	7.94	0	0	0.9	0	7.76
0	0	0	0	0	0	0	26.85	0	0	0	1.3	0	0	7.6	0	8.94
0	0	0	0	0	0	0	22.11	0	0	0	15.2	0	0	0.1	0	0.7
0	0	0	0	0	0	0	4.8	0	0	0	0.1	0	0	0.1	0.1	0
0.1	0	0	0	0	0	0	0	0	0	0	0	0	0	0	0	0
0	0	0	0	0	0	0	0	0	0	0	0	0	0	0	0	0
0	0	0	0	0	0	0	0	0	0	0	0	0	0.1	0	0.1	0
0.1	0	0	0	0	0.1	0	0	0.1	0	0	0	0	0.1	0	0.1	0
1.6	0	8.1	0	0.1	2	0	0	1.2	0	0	0.1	0.1	14.93	0.7	0.1	0.1
0.8	0	0	0	0	0.2	0	0.1	0	0	0	0.2	0.1	24.3	0.5	0.1	2.56
0.1	0	0	0	0	0	0	0	0	0	0	0	0.1	17.4	0	4.8	0
2.1	0	0	0	0.1	0.1	0	0	0	0	0	0	0.7	5.57	0	0.7	0
2.2	0	0	0	0.1	0.1	0	0	0	0	0	0	12.24	10.18	0	4.6	0
0.1	0	0	0	0	0	0	0	0	0	0	0	1.8	0.1	0	0.1	0
0.1	0	0	0	0	0	0	0	0	0	0	0	0	0.1	0	0.1	0
0.1	0	0	0	0	0	0	0	0	0	0	0	0	0	0	0	0
0.1	0	0	0	0	0	0	0	0	0	0	0	0	0.1	0	0	0
0.1	0	0	0	0	0	0	0	0	0	0	0	0	0	0	0.1	0
0	0	0	0	0	0	0	0	0	0	0	0	0	0	0	0	0
0	0	0	0	0	0	0	0	0	0	0	0	0	0	0	0	0
0.1	0	0	0	0	0	0	0	0	0	0	0	0	0	0	0	0
0	0	0	0	0	0	0	0	0	0	0	0	0	0	0	0	0
0	0	0	0	0	0.1	0	0.2	0	0	0	0	0	0.1	0	0	0.4
0	0	0	0	0	0.1	0	1.2	0	0	0	0	0.4	0.8	0.1	0	6.7
0	0	0.1	0	0.1	8.62	0	0.2	0.1	0	0	0.1	0.1	0.1	0	0.1	0.2
0	0.1	0	0	0.3	0.1	19.59	0	0.1	0	0	0	0.5	0.1	0	0	0.2
0.1	0.1	0	0	0.7	0.6	0.1	0.4	1.8	0	0	0.1	0.1	0.1	0	0.1	0.1
0.1	0.1	0	0.1	0.1	0.1	0	0	0.1	0.1	0.1	0	0.1	0.1	0	0.1	0
0	0.1	0	0.1	0.1	0.1	0	0	0	0	0	0	0.1	0	0	0.1	0
0	0	0	0	0	0.1	0	0	0	0	0	0	0	0	0	0.1	0
0.1	0	0	0	0	0	0	0	0	0	0	0	0	0	0	0	0
0.1	0	0	0	0	0	0.1	0	0	0	0	0	0	0	0	0	0
0	0	0	0	0	0	0	0	0	0	0	0	0	0	0	0	0
0	0	0	0	0	0	0	0	0	0	0	0	0	0	0	0	0
0	0	0	0	0	0	0	0	0	0	0	0	0	0	0	0	0
0	0	0	0	0	0	0	0	0	0	0	0	0	0	0	0	0
0.1	0.1	0	0.1	0	0	0	0	0	0	0	0	0	0	0	0	0
0	0	0	0	0	0	0	0	0	0	0	0	0	0	0	0	0
0	0.1	0	0.1	0	0	0.1	0	0	0.1	0.1	0	0	0	0	0	0
0	0.3	0	0.8	0.1	0	0.1	0	0.1	0	0	0	0	0	0	0	0
0	0	0.1	0	0.1	0	0	0	0.1	0	0	0	0.1	0.1	0	0	0
0.1	0.1	0	0.1	0.1	0.1	0	0	0.1	0.1	0.1	0	0.1	0	0	0.1	0
0.1	0.1	0	0.1	0.1	0	0	0	0	0.1	0.1	0	0.1	0.1	0	0.1	0
0	0	0	0	0	0	0	0	0	0	0	0	0	0	0	0.1	0
0	0	0	0	0	0	0	0	0	0	0	0	0	0	0	0	0
0	0	0	0	0	0	0	0	0	0	0	0	0	0	0	0.1	0
0	0	0	0	0	0	0	0	0	0	0	0	0	0	0	0	0
0	0	0	0	0	0	0	0	0	0	0	0	0	0	0	0	0
0	0	0	0.1	0	0	0	0	0	0.1	0.1	0	0	0	0	0	0
0	0	0	0	0	0	0	0	0	0	0	0	0	0	0	0	0
0	0	0	0	0	0	0	0	0	0	0	0	0	0	0	0	0
0	0	0	0	0	0	0	0	0	0	0	0	0	0	0	0	0
0	0	0	0	0	0	0	0	0	0	0	0	0	0	0	0	0
0	0	0	0	0	0	0	0	0	0	0	0	0	0	0	0	0
0	0	0	0	0	0	0	0	0	0	0	0	0	0	0	0	0
0	0	0	0	0	0	0	0	0	0	0	0	0	0	0	0	0
0	0	0	0	0	0	0	0	0	0.1	0.1	0	0	0	0	0	0
0	0	0	0	0	0	0	0	0	0	0	0	0	0	0	0	0
0	0	0	0	0	0	0	0	0	0	0	0	0	0	0	0	0
0	0	0	0	0	0	0	0	0	0	0	0	0	0	0	0	0
0	0	0	0	0	0	0	0	0	0	0	0	0	0	0	0	0
0	0	0	0	0	0	0	0	0	0	0	0	0	0	0	0	0
0	0	0	0	0	0	0	0	0	0	0	0	0	0	0	0	0
0	0	0	0	0	0	0	0.1	0	0	0	0	0	0	0	0.1	0
0	0	0	0	0	0	0	0	0	0	0	0	0	0	0	0	0
0	0	0	0	0	0	0	0	0	0	0	0	0.1	0	0	0	0
0	0	0	0	0	0	0	0	0	0	0	0	0.1	0	0	0	0
0	0.1	0	1.9	0.1	0	0	0	0	0.2	0.2	0	0	0.1	0	0	0
0.1	0.1	0	3.52	0.1	0.1	0	0	0.1	3.1	2.6	0	0	0	0	0	0
0.1	0	0	0	0.1	0.1	0	0	0	0	0	0	0.1	0.1	0	0.1	0
0.1	0	0	0	0	0.1	0	0	0	0	0	0	0.1	0.1	0	0	0.1
0.1	0	0	0	0	0.1	0	0	0	0	0	0	0.1	0.3	0	0.1	0.1
0.1	0	0	0	0	0.2	0	0	0	0	0	0	0.3	0.1	0	0.1	0
0.1	0	0	0	0	0.1	0	0	0	0	0	0.1	0.1	1.8	0	0.1	0.2
0.1	0	0	0	0	0	0	0	0	0	0	0	0.1	0.1	0	0.1	0
0	0	0	0	0	0	0	0	0	0	0	0	0.1	0.1	0	0.1	0
0	0	0	0	0	0	0	0	0	0	0	0	0	0	0	0.1	0
0	0	0	0	0	0	0	0	0	0	0	0	0	0.1	0	0	0
0	0	0	0	0.1	0	0	0	0	0	0	0	0	0.1	0	0	0
0	0	0	0	0	0	0	0	0	0	0	0	0	0.1	0	0	0
0.1	0	0	0	0	0	0	0	0	0	0	0	0.1	0.1	0	0.1	0
0	0	0	0	0.1	0	0	0	0	0	0	0	0.1	0.1	0	0	0
0	0	0	0	0	0	0	0	0	0	0	0	0	0.1	0	0.1	0
0	0	0	0	0	0	0	0	0	0	0	0	0	0.1	0	0	0
0	0	0	0	0	0	0	0	0	0	0	0	0	0	0	0	0
0	0	0	0	0	0	0	0	0	0	0	0	0	0	0	0	0
0	0	0	0	0	0	0	0	0	0	0	0	0	0	0	0	0
0	0	0	0	0	0	0	0	0	0	0	0	0	0	0	0	0
0	0	0	0	0	0	0	0	0	0	0	0	0	0	0	0	0
0	0	0	0	0	0	0	0	0	0	0	0	0	0	0	0	0
0	0	0	0	0	0	0	0	0	0	0	0	0	0	0	0	0
0	0	0	0	0	0	0	0	0	0	0	0	0	0	0	0	0
0.1	0	0	0	0	0	0	0	0	0	0	0	0	0	0	0	0.1
0	0	0	0	0	0	0	0	0	0	0	0	0	0	0	0	0
0	0	0	0	0	0	0	0	0	0	0	0	0	0	0	0	0
0	0	0	0	0	0	0	0	0	0	0	0	0	0	0	0	0
0	0	0	0	0	0	0	0	0	0	0	0	0	0	0	0	0
0	0	0	0	0	0	0	0	0	0	0	0	0	0	0	0	0
0	0	0	0	0	0	0	0	0	0	0	0	0	0	0	0	0
0	0	0	0	0	0	0	0	0	0	0	0	0	0	0	0	0
0	0	0	0	0	0	0	0	0	0	0	0	0	0	0	0	0
0	0	0	0	0	0	0	0	0	0	0	0	0	0	0	0	0
0	0	0	0	0	0	0	0	0	0	0	0	0	0	0	0	0
0	0	0	0	0	0	0	0	0	0	0	0	0	0	0	0	0
0	0	0	0	0	0	0	0	0	0	0	0	0	0	0	0	0
0	0	0	0	0	0	0	0	0	0	0	0	0	0	0	0	0
0	0	0	0	0	0	0	0	0	0	0	0	0	0	0	0	0
0	0	0	0	0	0	0	0	0	0	0	0	0	0	0	0	0
0	0	0	0	0	0	0	0	0	0	0	0	0	0	0	0	0
0	0	0	0	0	0	0	0	0	0	0	0	0	0	0	0	0
0	0	0	0	0	0	0	0	0	0	0	0	0	0	0	0	0
0	0	0	0	0	0	0	0	0	0	0	0	0	0	0	0	0
0	0	0	0	0	0	0	0	0	0	0	0	0	0	0	0	0
0	0	0	0	0	0	0	0	0	0.1	0.1	0	0	0	0	0	0
0	0	0	0	0	0	0	0	0	0	0	0	0	0	0	0	0
0.1	0	0	0	0	0	0	0	0	0	0	0	0	0	0	0	0
0	0	0	0	0	0	0	0	0	0	0	0	0	0	0	0	0
0	0	0	0	0	0	0	0	0	0	0	0	0	0	0	0	0
0	0	0	0	0	0	0	0	0	0	0	0	0	0	0	0	0
0	0	0	0	0	0	0	0	0	0	0	0	0	0	0	0	0
0	0	0	0	0	0	0	0	0	0	0	0	0	0	0	0	0
0	0.1	0	2.35	0	0	0	0	0	0.2	0.2	0	0	0	0	0	0
0	0.1	0.1	0.2	0	0	0	0.1	0.1	0.1	0.1	0	0	0.1	0	0	0.7
0	0	0	0	0	0	0	1.49	0	0	0	0.1	0	0.1	0	0	2
0	0	0	0	0	0	0	0	0	0	0	0	0	0	0	0.1	0
0	0	0	0	0	0	0	0	0	0	0	0	0	0	0	0.1	0
0	0	0	0	0	0	0	0	0	0	0	0	0	0	0	0.1	0
0	0.1	0	0.1	0	0.1	0	0	0.1	0.1	0.1	0	0	0	0	0	0
0	0	0.1	0	0	0.1	0	0	0	0	0	0	0	0	0.1	0	0.1
0.1	0	0	0	0	0	0	0	0	0	0	0	0	0	0	0.1	0
0.1	0	0	0	0	0	0	0	0	0	0	0	0	0	0	0.1	0
0.1	0.1	0	0	0.1	0	0	0	0	0	0	0	0.1	0.6	0	0.1	0
0.1	0.1	0.1	0.1	0.5	3.9	0	0	1.7	0	0	0	8.1	0.1	0	0.1	0
0.1	0.1	3	0	4.3	1.4	0	0	0.1	0	0	0	2.05	12.91	0.1	0.1	0.1
0	0.1	0.9	0	0.1	0.1	0	0	0.61	0	0	0.1	0	0.1	0.6	0.1	0.1
0.1	0.1	0	0	0.1	0.1	0	0	0	0	0	0.1	0	0	0.1	0.1	0.1
0	0.1	0	0	0	0	0	0	0	0	0	0	0	0	0	0.1	0
0	0	0	0	0	0	0	0.4	0	0	0	0	0	0	0	0.1	0
0	0	0	0	0	0	0.1	0	0	0	0	0	0.1	0	0	0.1	0
0	0	0	0	0.1	0	0	0	0	0	0	0	0.1	0	0	0	0
0	0.1	0	0.1	0	0	0	0	0	0.1	0.1	0	0	0	0	0.1	0
0	0.1	0	0	0	0	0	0	0	0	0	0	0	0	0	0	0
0.1	0	0	0	0.1	0.1	0.1	0	0	0.1	0.1	0	0.1	0.1	0	0.1	0
0.1	0	2.1	0.1	0.1	0.1	0	0.1	0.1	0	0	0.1	0.1	0.1	1	0.1	0.2
0.1	0	0	0.1	0.1	0	0	0	0.1	0	0	0	0	0	0	0.1	0
0.1	0.1	0	0.1	0.1	0	0	0	0	0	0	0	0	0.1	0	0.1	0
0.1	0.1	0	2.6	0.1	0.1	0	0	0	0.1	0.1	0	0	0.1	0	0.1	0
0.7	0	0	1.87	0	0	0	0	0	1.2	0.9	0	0.1	0.1	0	0.1	0
0.1	0.1	0	0	0	0	0	0.7	0.1	0	0	0	0	0	0	0.1	0.1
0.1	0	0	0	0	0	0	0	0	0	0	0	0	0	0	0.1	0
0.1	0	0	0.1	0	0	0	0	0	0.1	0.1	0	0	0	0	0.1	0
0.1	0.1	0	0	0	0	0	0	0	0	0	0	0	0	0	0	0
0.1	0.1	0	0.1	0	0	0	0	0	0.1	0.1	0	0	0	0	0	0
0.1	0	0	0	0	0	0	0	0	0	0	0	0	0	0	0	0
0.1	0	0	0	0	0	0	0	0	0	0	0	0	0.1	0	0	0
0.1	0	0	0	0	0	0	0	0	0	0	0	0	0	0	0.1	0
0.1	0	0.1	0	0.1	0.2	0	0	0.1	0	0	0	0.1	0.1	0	0.2	0
0.1	0.1	0.1	0	0	0.9	0	0	0.1	0	0	0	0.1	0.1	0.1	0.1	0.1
0.1	0.1	0	0	0	0	0	0	0	0	0	0	0	0	0	0.1	0
0.1	0.1	0	0	0.1	0	0	0	0.1	0	0	0	0.1	0.1	0	0.1	0.1
0.1	0	0.1	0	0	0	0	0.1	0.1	0	0	0	0	0.1	0.1	0.1	0.1
0.1	0.1	0	0	0	0	0	0	0	0.1	0.1	0	0	0.1	0	0.1	0.1
0.1	0.1	0	0.1	0.1	0	0.1	0	0	0.1	0.1	0	0	0.1	0	0.1	0
1.63	0	0	0	0	0	0.4	0	0	0	0	0	0.1	0	0	0.1	0
0.9	0	0	0	0	0	0	0	0	0	0	0	0.1	1.5	0	0.1	0
0.7	0	0	0	0	0	0	0	0	0	0	0	0.1	0.1	0	0.1	0
0.1	0	0	0	0	0	0	0	0	0	0	0	0	0	0	0	0
0	0	0	0	0	0	0	0	0	0	0	0	0	0	0	0	0
0	0	0	0	0	0	0	0	0	0	0	0.1	0	0	0	0	0
0	0	0	0	0	0	0	0.1	0	0	0	7.48	0	0	0	0	0
0.1	0	0	0	0	0	0	0.5	0	0	0	0.8	0	0	0	0	0
0.1	0	0	0	0	0	0	0.1	0	0	0	1.4	0	0	0.1	0	0
0.1	0	0	0	0	0	0	0.1	0	0	0	21.8	0	0	0	0	0
0.1	0	0	0	0	0	0	0	0	0	0	1.1	0	0	0	0	0
0.1	0	0	0	0	0	0	0	0	0	0	0.1	0	0	0	0.1	0
0.1	0	0	0	0	0	0	0	0	0	0	0.1	0	0	0	0	0
0.1	0	0	0	0	0	0	0	0	0	0	0.1	0	0	0	0	0
0.5	0	0	0	0	0	0	0	0	0.1	0.1	0.1	0	0	0	0.1	0
38.33	0.1	0	0	0	0	0	0	0	0	0	0.1	0	0	0	0	0.1
53.63	0	0.1	0	0.1	0.1	0	0	0	0	0	0.1	0	0	0.1	0	0
4.99	0	0	0	0	0	0	0	0	0	0	0.1	0.1	0	0	0.1	0
0.1	0	0	0	0	0	0	0	0	0	0	0.1	0.1	0	0	0.1	0.1
0.1	0	0	0	0.5	0.1	0.1	0	0	0	0	0.1	0	0	0	0.1	0
2.1	0.1	0.1	0	7.5	0.4	9.16	0	0.2	0.1	0.1	0.1	2	0.1	0	0.1	0
10.2	3.64	1.4	0	76.81	2.9	27.41	0	0.8	0	0	6.8	184.49	0.1	5.9	25.4	0.7
1.3	16.7	30.28	0.1	17.37	0.1	0	0.1	28.55	0.1	0.1	25.66	0.1	0.1	20.09	0.1	0
0.1	0	0.1	0	0	0	0	4.7	0.9	0	0	21.4	0	0	18.16	0.1	0.8
0.1	0.1	0	0	0	0	0	0.1	0	0	0	2.1	0	0.1	0	0	0
6.59	0	0	0	0	0	0	0	0	0	0	0.1	0	0.1	0	0.1	0
0.2	0	0	0	0	0	0.1	0	0	0	0	0.1	0	0.1	0	0.1	0
0.1	0	0	0	0	0	0.1	0	0	0	0	0	0.1	0.1	0	0.1	0
0.1	0	0	0	0	0	0.1	0	0	0.1	0.1	0	0	0.5	0	0.1	0
0.1	0	0	0	0	0	0	0	0	0.1	0.1	0.1	0	0.1	0	0	0
0.1	0	0	0	0	0	0	0	0	0	0	0	0	0	0	0	0
0.1	0	0	0	0	0	0	0	0	0	0	0	0	0	0	0.1	0
0.1	0	0	0	0	0	0.1	0.1	0	0	0	0.1	0	0	0	0	0
0.1	0.1	0	0	0	0	0.1	6.9	0	0	0	0.1	0	0	0	0.1	0
0.1	0.1	0	0	0	0	0.1	3.1	0	0	0	2.5	0	0	0	0.1	0
0.1	0.1	0	0	0	0	0.1	0	0.1	0	0	0	0.1	0	0	0.1	0.1
0.1	0.1	0	0	0.1	0.1	0.1	0	0	0	0	0	0.1	0	0	0.1	0.1
0.1	0.2	0	0	0.1	0.1	0.1	0	0	0	0	0	0.1	0	0	0.1	0
0	0.1	0	0	0.1	0.1	0.1	0	0	0	0	0	0.1	0	0	0	0
0	0	0	0	0	0.1	0	0	0	0	0	0	0	0	0	0	0
0.1	0	0	0	0	0	0	0	0	0	0	0.1	0	0.1	0	0	0
0.1	0.1	0	0	0	0	0	2.1	0	0	0	3.3	0	0.1	9.12	0.1	0.1
0.1	0.1	0.1	0	0	0	0.1	0.3	0	0	0	0.1	0	0	0.5	0.1	0.3
0.1	0.1	0.1	0	0	0.1	0.1	0.3	0	0	0	0.1	0	0.1	0.1	0.1	0
1.2	0	0	0	0	0.1	0.1	0.5	0	0	0	0.1	0	0.1	0.1	0	0.1
7.9	0	0	0	0	0.1	0.1	0.1	0	0	0	16.13	0	0.1	0.1	0.1	0
0.9	0	0	0	0	0.1	0.1	0.1	0	0.1	0.1	36.36	0	9.6	3	0.2	0
2.2	0	0	0	0	0.1	0.1	0.1	0	0.1	0.1	53.14	0.9	9.23	0.1	19.9	0.7
6	0	0	0.1	5.29	0.1	0.1	0	0.1	0.6	0.5	30.81	3.7	0.1	0	0.1	0
1.4	0.1	0	0.1	11.87	0.4	0.1	0	0.1	0.1	0.1	10.4	5.44	4.28	6.6	0.1	0.1
1.8	0.1	1	0.1	4.83	1.8	0.1	0	0.1	0.1	0.1	30.95	1.5	3.8	20.7	0.1	0.3
0.8	0.1	19.86	0	2.7	5.5	5.84	5.51	0	0	0	110.61	2.1	0.3	18.06	0.1	7.65
0.9	0	3.95	0	0.1	0.1	0.1	25.67	0	0	0	108.72	0.5	0.1	3.1	0.1	16.06
3.2	0	32.06	0	0	1.5	0.1	0.8	0	0	0	27.3	0.1	1.7	38.18	4.7	5.2
2.1	0	13.39	0	0.1	11.86	0.1	5	0	0	0	0.1	0.2	10.4	0.1	0.1	1.8
11.43	0	0	0	6.9	2.6	0.1	5.55	0	0	0	6.9	10.35	197.33	0.2	4.1	0.1
48.13	0.1	0	0	0.9	27.18	0.1	8.74	0	0	0	10.52	34.54	249.71	7.6	133.7	2.7
2.8	4.5	7.6	0	83.29	3.43	0.1	7.3	11.43	0.1	0.1	3.4	255.01	66.37	7.93	46.75	0.2
13.04	12.9	3.3	2.6	15.6	0.3	41.28	1.3	5.7	0.1	0.1	1.9	50.31	4.65	0.1	0.2	4.6
1.3	0.1	0.1	0.1	1.6	0	206.07	2.5	0.1	2.2	1.7	11.99	1.2	0.1	6.4	0.1	3.7
0.1	0.1	0.1	0.1	0.1	0.1	89.54	16.91	0	0.1	0.1	26.2	3.1	0.1	20.76	0.1	0.9
1.2	0.5	1.2	0	4	0.1	1.9	17.56	0.1	0.1	0.1	21.99	24.63	0.1	28.77	0.1	1.5
6.86	0.5	10.9	0	0.9	5.8	2.8	0.1	1.6	1.6	1.2	3.1	0.8	0.3	13.1	3.4	22.12
5	0.4	35.48	0.3	6.6	3.6	3.2	44.38	2.5	7.04	6.89	0.1	4.43	0.2	7.54	0.3	23.11
15.1	0.9	26.47	0	93.87	3.3	0.7	48.86	0.1	3.1	2.6	0.1	26.67	3	0.9	28.04	47.96
11.9	2	5.7	19.66	64.24	9.92	10.68	14.8	11.98	9	9.11	2.5	4	0.1	5.8	2.6	11.3
3.6	5.2	2.62	0	26.25	0.1	109.56	15.05	6.9	3.92	3.7	15.47	7.7	0.1	5.1	7.93	10.6
1	46.17	3.6	0.6	0.1	0.1	34.78	0.1	5.7	26.97	30.17	0.2	0.6	0.1	8	3.31	23.66
4.5	12.41	14.32	0.3	2.1	0.1	4.2	1	14.93	7.08	6.9	0.3	6.2	0.2	10.8	0.4	22.38
3.5	5.3	4.17	9.2	0.2	38.71	8.8	17.7	27.8	24.73	26.7	0.6	1.69	0.1	1	0.2	46.62
1.63	0.1	1.92	0	0.1	58.2	4.61	38.56	5.5	4.1	3.84	35.26	0.2	0.1	14.5	0.1	29.16
0.9	0	35.41	0.1	0.1	34.9	3.7	20.16	12.79	0.1	0.1	18.26	2.2	0.1	46.37	3.8	6.7
0.4	0	93.51	0	0.1	10.7	3.41	19.63	20.6	4.19	3.9	29.72	2.75	0.1	57.15	2.48	11.8
2	0	66.6	0	0.1	17	4.2	8.08	33.72	0.1	0.1	15.78	2.3	0.1	16.6	8.29	0.4
1.9	0.1	43.69	0	0.1	21.3	0.1	11.24	153.53	0.1	0.1	2.1	2.2	0.1	8.2	0.4	1.7
2.4	27.77	32.24	0.1	7.99	0.1	0.1	14.33	58.01	0.1	0.1	3.6	1.2	0.1	18.68	5.7	22.68
0.4	73	20.52	0.4	3.4	3.49	0.1	15.16	4.7	0.1	0.1	0.8	1.41	0.1	9.07	0.2	29.14
2.3	37.01	0.1	0.1	0.1	7	11.26	27.65	3.9	0	0	0.3	16.21	3	0.1	0.1	19.77
3	1	0	0	2.4	7.41	0.7	64.82	1.2	0.1	0.1	2.2	17.19	7.22	0.1	0.1	19.82
0.9	0.1	0.1	0	7.5	4.4	0.9	75.32	1.24	4.5	4.1	0.9	32.42	11.81	0.1	2.6	32.67
1.7	0.1	0.8	52.36	1.4	7.1	0.1	40.96	4.6	55.26	59.41	4.93	5.21	3.38	0.7	0.9	54.62
0.8	0.1	0	0.1	5	9.4	0.1	26.18	1.7	0.1	0.1	0.1	2	0.4	0.1	1.07	41.11
1.7	0.1	0	0.1	0.9	18.1	0.3	26.35	19.48	0.1	0.1	2.1	0.2	4.8	0.1	0.8	44.83
2.2	0.1	0.1	0.1	0.1	13.6	1	27.48	0.3	0.1	0.1	14.5	1.2	4.5	5.28	1.9	49.17
36.86	1.5	5.2	0.1	0.1	34.3	1	6.2	1	0.1	0.1	2.16	26.32	2.32	11.69	4.3	42.1
6.7	12.25	4.44	0.2	21.78	28.43	0.1	0.1	18.45	12.71	13.99	2.26	31.53	0.1	5.67	4.6	8.99
0.7	46.2	3.2	0.2	41.48	0.4	7.6	0.7	3.99	0.1	0.1	0.7	17.64	0.1	3.02	0.1	1.1
0.4	2.14	0.28	1.15	0.6	0.1	0.3	26.37	0.1	0.1	0.1	38.53	1.2	0.1	0.9	0.4	3.4
0.2	0.1	1.55	0.2	0.2	0.1	0.1	25.16	0.1	0.1	0.1	35.37	0.2	0.1	2.96	0.1	2.2
1	0.1	4.4	0.1	0.1	0.1	0.37	30.65	0.1	16.2	18.9	43.06	0.1	0.1	9.34	0.1	8.6
0.4	0.1	4.8	4.7	0.3	0.1	0.1	31.25	1.8	15.4	17.76	48.23	0.1	0.1	23.77	0.1	2.1
1	0.1	49.92	3.6	0.1	0.5	0.1	19.25	4.28	9.99	10.3	36.77	0.1	0.1	36.72	0.1	1.3
0.1	0.1	8.2	0	0.1	0.1	0.4	17.63	0.2	0.1	0.1	49.67	0.1	0.1	19.96	0.1	6
2.5	0.1	29.29	0	0.2	0.55	0.3	32.82	0.3	0.1	0.1	16.9	0.1	0.7	20.09	0.1	11.6
3.2	0.1	29.13	0	0.1	0.1	0.1	5.3	16.04	0.1	0.1	39.66	0.1	0.1	5.3	0.1	1.6
8	0.1	8.85	0.1	0.1	0.1	0.3	9.7	4.12	0.1	0.1	36.01	0.1	0.1	47.06	0.1	11.9
18.69	0.1	54.23	0	0.1	0.1	1	8.6	11.83	0.1	0.1	15.1	0.1	0.1	21.71	0.1	18.6
10.3	0.1	18.15	0.6	0.1	0.1	0.1	13.69	0.6	3.2	2.8	5.2	0.1	0.1	22.87	0.1	10.1
6.4	0.4	35.34	0.1	0.1	0.1	1.3	9.8	18.6	3.8	3.4	35.1	0.1	6.8	29.07	18.87	11.74
1.7	0.3	39.27	0.1	0.1	2.2	1.3	0.9	27.99	11.3	12.1	3.5	0.7	27.73	24.99	13.52	1.65
0.8	2.4	20.06	23.32	0.1	18.64	1.3	1.8	27.8	46.84	52.99	3.7	9.93	1.6	4	9.3	4.62
1.5	3.64	29.17	40.89	2.4	18.1	5.4	1.9	40.18	12.97	14.51	8.7	22.1	0.6	0.5	6.19	6.6
2	16.53	0.5	0.9	0.1	21.28	4.3	4	26.17	0.1	0.1	2	32.11	3.8	1.2	0.2	7.28
0.1	53.2	0.1	0.1	3.62	17.05	4.3	10.64	16.48	0.2	0.2	18.94	21.26	0.8	6	9.1	17.58
0.7	26.6	40.85	0	6.4	8.84	10.25	22.54	8.56	0.2	0.2	22.36	5.1	0.1	28.11	5	6.6
1.1	6.77	103.86	6.37	5.5	3	3.7	23.37	11.49	18.11	20.57	15.93	7.1	0.3	20.05	25.06	1.5
3.65	0	57.94	0	0.1	5.6	0.9	27.61	24.44	6.8	6.45	5.7	0.7	0.1	37.68	8.39	6.4
2.4	0.1	44.24	0	0.1	12.2	1.1	25.5	38.32	0.1	0.1	0.7	0.1	0.4	11	4.7	3.2
10.14	0.1	22.75	5.4	0.1	16.49	2	5.8	22.5	21.52	23.43	0.1	0.1	0.2	4.3	0.1	10.27
5.42	29.66	3.9	12.09	0.1	0.85	0.8	0.5	3.7	40.36	46.47	0.1	0.1	0.1	0.1	0.2	0.1
18.01	2.7	4.21	0.1	0.1	0.1	0.5	0.1	2.5	0	0	0.3	0.1	10.71	0.1	3.38	0
4.4	0.1	0.5	0.1	0.1	5.2	0.1	0.1	9.3	2.83	2.3	4.7	7	30.02	0	7.45	0.1
4.4	1.2	2.1	11.09	6	5.34	0.1	0.1	0.1	12.1	13.02	8.91	16.3	17.14	9.74	8.27	0.1
5.5	16.91	7.06	20.96	1.8	3	0.1	0.1	0.5	24.03	25.32	6.45	9.73	13.48	6.2	3	0.1
11.59	16.44	11.05	16.7	2.7	4	0.1	0.1	0.2	18.21	20.66	0.1	16.29	8.3	6.2	13.45	0.1
34.86	13.6	0.1	9.89	12.02	12.4	0.1	0.1	0.1	24.1	25.44	0.2	24.19	24.91	0.1	18.1	0.1
14.18	12.15	0	20.19	7.41	2.45	0.8	0.1	0.1	30.7	36.02	0.5	25.12	39.28	0.1	31.41	0.1
13.11	10.95	0.1	2.1	7.2	1.5	0.2	3.8	0	9	9.3	0.1	26.19	29.56	0.1	12.79	1.8
2.6	4.34	0.1	20.63	0.2	57.94	0.1	4.7	0.1	72.84	68.63	3.6	21.32	7.7	0.2	5	8.34
0.1	2.54	0.1	16.7	4.4	90.18	0.1	18.58	0.1	48.54	54.08	0.1	11.26	3.8	0.1	0.1	22.09
0.1	19.29	0.1	0.7	6.3	34.77	6.7	18.3	0.1	71.49	66	0.1	11.5	0.2	0.1	0.1	17.35
0.1	22.58	0.6	0	7	5.4	11.29	21.37	1.6	0.9	0.7	1.6	2.6	0.1	4.7	1.3	21.59
0.1	3.51	1.3	4.6	1.4	8.07	4.4	26.67	10.9	52.43	56.55	0.1	3.7	0.1	0.8	1.7	26.04
0.1	27.74	0.4	98.07	18.11	18.3	12.26	1.6	1.4	83.21	76	0.1	7.8	4.1	0.1	0.6	10.64
0.2	29.58	0	0.1	15.7	3.4	35.81	0.1	2.55	3.89	3.5	1	9.5	0.2	2.1	0.1	2.2
0.4	19.6	0.1	0.1	17.25	14.21	41.41	0.1	4.09	25.71	27.95	0.1	7.33	14.88	0.1	0.1	0.1
2.63	15.35	0	0.1	8.5	2.4	54.05	0.1	0.1	9	9.3	0.1	16.3	15.5	0.1	10.64	0
1.6	0.1	0	0	0.4	0.2	97.48	0.1	0.1	0.1	0.1	0.1	2.7	0.1	0.1	11.63	0
0.2	0.2	0	0	0.1	0.2	38.75	0.1	0.1	0	0	0.1	5.5	0.8	0.3	4.69	0.1
0.7	0.1	0	0.1	0.1	0.1	2.6	0	0.1	0.1	0.1	2.5	1.6	0.1	0.3	0.6	0.3
0.2	0.1	0.1	0	0.1	0.1	0.8	0	0.1	0.1	0.1	25.09	0.1	0.1	0.6	1.7	0.1
3.2	0.1	0.1	0	0.1	5.9	0.1	0.1	0.9	0.1	0.1	9.9	0.1	11	7.3	3.13	0
7.7	0.1	1.9	0.1	2	3.2	0.1	0.1	14.36	0.1	0.1	4.4	11.97	40.09	2.1	24.62	0.1
5.4	0.1	0.1	0.1	5.5	0.2	0.1	0.1	5.6	0.1	0.1	8.48	25.37	0.1	0.1	2.6	0.1
3	0.5	0.1	0.1	0.1	0.1	0.1	0.6	24.17	0.1	0.1	14.82	0.2	3.3	0.1	0.4	2.4
2.2	2.3	49.83	0	0.1	0.7	0.1	17.08	37.77	0	0	4.4	0.1	5.57	21.52	0.1	6.5
0.1	0	118.02	0	0.1	0.4	0.1	33.05	12.72	0	0	31.36	0.1	0.1	1.9	0.1	17.98
0.2	0	76.98	0	0.1	0.1	0.14	35.93	3.9	0.1	0.1	15	0.1	0.1	10.4	0.1	21.25
2.5	0.1	35.33	5.56	0.1	0.1	0.1	36.53	11.17	0.9	0.7	15.53	0.1	0.1	9.48	0.1	24.73
3.58	0.8	7.9	0.1	0.1	14.72	1.1	6.4	21.96	2	1.5	4.5	0.1	0.1	8.22	0.1	33.17
8.26	14.92	16	4.29	0.1	10.4	2.2	0.2	20.47	0.1	0.1	2.78	5.4	0.1	0.6	0.1	1.3
19.24	17.49	2	0.1	8	2.8	1.2	0.1	13.13	0.1	0.1	0.1	1.7	2.7	0.1	0.1	0.1
3.7	6.5	1.3	0.1	1.2	3.4	0.1	0.7	0.1	0.1	0.1	0.1	8.3	4.25	0.1	1.4	0.1
2.9	0.1	0.1	0	2.2	0.5	0.1	5.2	0.1	0	0	0.1	2.2	12.7	2.7	2.4	0.1
3.9	0.1	0.7	1.2	1.9	2.4	0.1	0.1	1.5	3.1	2.6	0.1	3.76	23.35	0.1	4.3	0.1
2.2	2.7	0	0.7	17.01	4.2	0.1	0.1	0	19.75	22.29	0.1	15.84	43.12	0.1	4.7	0.1
9.9	0.1	0	0.1	14.44	1.2	0.1	0.1	0	11.3	12.1	1.9	34.44	91.81	0	0.1	0.1
15.5	0.1	0	0	39.02	4.67	5.9	0.4	0	0.3	0.3	4.8	112.68	33.19	0.1	5.67	0.1
6.4	0.1	0.1	0.1	23.92	6.2	31.15	0.9	0	4.5	4.1	2.6	59.85	0.5	0.1	0.2	0.1
13.09	0.1	0.1	0	14.35	10.86	33.81	1.2	0.1	0.1	0.1	1.8	12.1	0.1	0.1	0.3	0.1
3.9	0.1	0.1	0	13.8	10.4	42.9	0.7	0	0.2	0.2	0.1	38.24	3.1	0.1	0.5	1.8
16.01	0.1	0	0	4.62	15.01	28.98	0.7	0.1	0.1	0.1	1.3	33.19	4.5	0.1	0.1	10.54
8.7	0.1	1.5	0	15.63	23.17	11.3	2.1	0.4	0	0	6.2	16.1	11	7.52	2.6	12.7
2.4	0.1	3.5	0	18.41	29.24	0.1	0.6	4.29	0	0	0.1	20.4	11.48	4	11.27	5.3
2.7	1.5	0.1	0	49.88	10.53	0.1	0.1	2.9	0.1	0.1	0.1	47.78	35.99	0.1	16.97	0.1
6.52	4.87	0	0	47.76	2.07	0.1	0.1	0.1	0.1	0.1	1	32.15	28.62	0.1	58.41	0.1
1.7	0.7	0.1	0	2.6	2.46	107.3	0.1	0.1	0	0	0.1	14.59	1.5	0.1	32.21	0.1
1.31	2.3	0.1	0.1	4.8	0.1	107.21	14.7	0.4	0.7	0.5	14.7	1.9	0.1	6.35	0.8	0.1
0.5	0.2	1.8	0.1	3.6	0.1	0.1	0.2	1	11.85	12.75	0.1	11.81	10.7	3.7	9	0.7
0.2	0.1	4.79	0.1	8.51	4.1	0.1	0.1	0.1	3	2.4	0.1	0.9	10.88	0.1	3.3	0.1
4.3	0.2	0.1	0.1	7.3	0.1	0.1	0	0.1	1.8	1.4	0.1	8.7	4.9	0.1	3.4	0.2
3.2	0.1	5	1.8	0.1	0.5	0.1	0	0.1	10.75	11.4	0.1	0.1	0.7	0.1	0.2	1.4
5.31	0.1	2.9	1.53	0.3	7.6	0.1	0.1	2.1	8.9	9.1	7.46	1.2	4.5	3.56	2.4	0.1
11.16	0.4	12.6	0	8	6.71	0.1	0.1	5.35	0.1	0.1	1.1	11.81	4.47	8.3	5.48	0.5
1.8	0.1	0.1	0.1	6	0.1	0	0.1	3.7	0.1	0.1	0.7	2.8	0.5	1.11	25.91	0.2
0.1	2.28	0.1	0.1	0.1	0.1	6.91	0.1	0.1	0.1	0.1	0.1	4.4	0.1	0.2	1	1.6
0.1	0.5	3.5	0	0.1	7.72	8.9	0.1	5.76	1	0.7	3.3	3.37	0.2	1.4	0.9	6.2
0.1	0.7	0.1	0	1.4	9.4	0.3	0.5	5.8	0	0	0.1	0.9	0.7	7.54	0.1	3.4
0.1	1.3	0.4	0	7.27	1.8	0.2	0.1	7.46	0	0	0.5	0.1	2.4	0.1	0.1	0.3
1.72	45.03	1	0.1	13.68	0.8	0.1	0.15	5.7	0.1	0.1	1.1	3.7	0.4	4	2.92	0.1
1.3	8.14	0	0	6.3	0.6	0	3.8	4.4	0	0	0.1	0.9	0.1	2.7	0.1	0.1
1.3	0.1	0.1	0	3.9	3	0.1	5.32	5.9	0.5	0.4	0.1	0.1	0.1	16.8	0.1	0.9
1	0.1	0.1	0.6	1.1	0.46	0.1	10.5	8.5	5.9	5.7	0.1	0.7	0.1	0.8	0.1	17.96
0.9	0.1	0	1.6	5.29	6.2	0.1	0.7	2.1	0.1	0.1	0.1	0.1	11.76	13.1	0.89	3.3
0.3	0.1	0.1	0.1	5.23	8.5	0	3.28	0.1	0.1	0.1	0.1	2.5	15.1	0.8	0.2	0.1
1.26	0.1	6.06	0	0.1	1.5	0.1	6.5	0.1	0.1	0.1	1.6	1.4	2.3	6.1	2.4	0.8
1.6	0.1	6	0.3	0.1	1.6	0.1	15.12	0.1	0.1	0.1	3.2	5.3	2.4	13.5	4.19	0.1
13.74	0.3	3.39	3.8	0.1	2.4	0.1	7.42	0.1	3.7	3.38	2.2	0.1	1.1	12.7	0.6	5.6
2.9	0.1	0.1	0.1	0.1	1.78	0.1	21.7	0.1	0.7	0.6	8.82	0.1	0.8	11.23	8.5	17.89
0.2	0.1	0	0	0.1	0.8	0.1	22.65	0	0	0	0.4	8.1	18.41	0.1	1	10.7
0.2	0	0	0	0.1	0.1	0.1	13.8	0.1	0	0	0.1	0.9	12.15	0	4.35	0.8
0.7	0	0	0	0.8	0.9	0	5.9	0.1	0	0	0.1	0.1	0.1	0.1	0.1	1.4
1.3	0	0.1	0	3.62	0.46	0	1.9	0.1	0	0	0.1	0.6	0.7	0	0.1	0.5
0.3	0	0	0	0.1	0.5	0	0.4	0	0.1	0.1	0	2.58	0.1	0	0.1	0.1
7.6	0.1	0	0	0.1	0.1	0.1	0.1	0	0.1	0.1	0.1	0.1	0.1	0	1.4	0.1
0.65	0.1	0	0	0.1	0	0	0	0	0	0	0.1	0.1	0.1	0	0.1	0
0.1	0	0	0	0	0.1	0.1	0.1	0	0	0	0	0.1	0	0	0.1	0
0.1	0	0	0	0	0	0	20.9	0	0	0	0.4	0	0	0.1	0	9
0.1	0	4.44	0	0	0.1	0	24.58	0.1	0	0	10.28	0.1	0.1	11.6	0.1	25.72
1.9	0	21.73	0	0.1	15.35	0	13.31	0.3	0	0	1.3	0.1	0.1	12.7	0.1	9.5
0.5	0.1	10.33	0	2.3	17.27	0	8.6	3.6	0	0	0.1	0.1	2.6	3	0.1	1
0.1	18.78	3.6	0.1	15.16	0.1	0	14.6	0.1	0	0	0.1	5.4	17.61	1.29	0.1	0.4
0.1	11.24	12.85	0.3	0.1	0.8	1.6	1.2	2.5	0	0	0.1	16.47	16.13	4.1	0.6	0.1
0.75	10.2	0.7	7.09	0.1	0.1	12.88	0.4	5.3	0.1	0.1	0.1	5.65	15.48	0.1	0.2	0.1
1.4	7.01	0.1	0.1	2.1	0.4	0.1	8.6	0.1	0	0	0.1	10.1	41.79	5	19.9	0.9
0.2	0	5.2	0	2.8	0.1	0.1	21.61	0.3	0	0	0.1	19.16	32.62	0.1	9.83	8.5
0.8	0	0	0	0.1	0.3	0.1	27	0	0	0	0.1	4.6	44.32	0.1	5.2	14.7
0.8	0	0	0	0.1	0.1	0.1	0.1	0	0	0	0	18.75	27.84	0	0.3	0.1
2.7	0	0	0	0.1	0.1	1.9	0	0	0	0	0	0.1	4.4	0	0.1	0
2	0	0	0	0.1	0.1	0.1	0.1	0	0	0	0	2.5	11.72	0	4.6	0
5.6	0	0	0	0	0.1	0.1	0.1	0	0	0	0	0.9	0.8	0	8.6	0.1
4.1	0	0	0	0	0.1	2.1	0.3	0	0	0	0.1	0.1	2.6	0	6.1	0.1
1.1	0	0	0	0	0.1	0	0.7	0	0	0	0.1	0.4	1.1	0	10.2	0.1
0.6	0	0	0	0	0.1	0	0.1	0	0	0	0.1	1.3	0.1	0	0.1	0.1
1.6	0	0	0	0	0.1	0.1	0.1	0	0	0	0	0.1	0.1	0	0.1	0.1
19.05	0	0	0	0	0.1	3.1	0	0	0	0	0	0.1	0.1	0	0.1	0
41.59	0	0	0.1	0	0.1	14.25	0	0	0.1	0.1	0	0.1	0.9	0	0.2	0.1
27.96	0	0	0	0.1	0.42	0.1	0	0	0	0	0.1	7.9	2.1	0	0.1	0.2
1.8	0	0	0	1.3	0.4	0.1	0	0	0	0	0.1	0.4	0.1	0	0.1	0.3
0.1	0	0	0	0.2	0.1	0	0	0	0	0	0.1	0.1	0.1	0	0.1	0.1
0.5	0	0	0	0.1	0.1	11.2	0	0	0	0	0	0.1	0.1	0	0	0
0.1	0	0	0	0.1	0.1	6.59	0	0	0.1	0.1	0	0.1	0.1	0	0.1	0.1
0.1	0	0	0	0	0	0.1	0	0	0.1	0.1	0	0.1	0.1	0	0.1	0
53.12	0	0	0	0.6	0.1	0	0.1	0	0.1	0.1	0.1	0.4	24.88	0	11.39	0.1
5.4	0.6	0.1	0	12.53	0.1	0.1	0	1.5	0	0	0.1	21.49	2.9	0	15.84	0.1
0.1	3.5	13.21	0.1	18.5	2	0.2	0	19.76	3	2.4	0	3.9	0.1	0.1	0.1	0
0.1	0	13.63	0	10.28	0.1	0.1	0	10.2	0	0	0.1	3.1	0.1	2.5	0.1	0.1
0.1	0	0	0	4.8	0.2	11.2	0.4	0	0	0	0.1	0.1	0.1	0	0.1	0.1
0.1	0	0	0	0.1	0	10.4	0.1	0	0	0	0	0.1	0.1	0.1	0.1	0
0.1	0	0	0	0.1	0	0.1	0.1	0	0	0	0	0.1	0.1	0.1	0.1	0
0.1	0	0	0	0	0	0.1	0.1	0	0	0	0	0	0	0	0.1	0
0	0	0	0	0	0	0	0.1	0	0	0	0	0	0	0	0	0.1
0	0	0	0	0	0.1	0	10.58	0	0	0	0.1	0	0	0.1	0	13.9
0.1	0	0	0	0	0.1	0	15.32	0	0	0	1.6	0.1	0.1	0.8	0.1	7.4
0.1	0	0	0	0.1	0.1	0	0.4	0	0	0	0	0.1	0.1	0	0.1	0.1
1.89	0	0	0	0.1	0.1	0	0	0	0	0	0	0	2.2	0	0.1	0
0.1	0	0	0	0.1	0.1	0	0	0	0	0	0.1	0.9	0.2	0	6.24	0.1
0.1	0	0.1	0	0.1	0.1	0.1	0	0	0	0	0.1	0.1	0.1	0	0.1	0
0.1	0	0	0	0	0	0.1	0	0	0	0	0.1	0.1	0.1	0	0.1	0
0.1	0	0	0	0	0	4.97	0	0	0	0	0	0	0.1	0	0.1	0.1
0.1	0	0	3	0	0	8.88	0	0	0.1	0.1	0	0	0.1	0	0.1	0
0.1	0.1	0.1	0.9	0	0.1	17.89	0	0.1	1	0.8	0	0.1	1.6	0	0.1	0
0	0.1	0.4	2.33	0	0.4	0	0	0.1	0.6	0.4	0	0	3.6	0.5	0.1	0.1
0.1	0.1	0.1	1.3	0.1	0.1	0.1	0	0	4.8	4.4	0	1.6	0.8	0.1	0.1	0
0.3	0.1	0	0	4	0	2.4	0	0.1	0	0	0	0.6	0.1	0.1	0.1	0
0.1	0.1	0	0.1	0.5	0	5.13	0	0.1	0.1	0.1	0	0.1	0	0.1	0.1	0
0.1	0.1	0	11	0.1	0	8.2	0	0	3.1	2.6	0	0.1	0	0.1	0.3	0
0.1	0.2	0	36.22	0	0.1	0.1	0	0.1	19.1	21.33	0	0.1	0.1	0.1	0.1	0
0.1	0.2	0.1	15.97	0.1	0.8	0	0	0.1	3.12	2.72	0.1	0.1	0.9	0.1	0.1	0
0.3	0.1	0.1	0	0.1	0.2	0	0	0	0	0	0.1	0.1	4.2	0.1	0.1	0
0.1	0	0.1	0	0.1	0.1	0	0	0.1	0	0	0.1	0.1	15.26	0	5.2	0.1
0.1	0	0	0	2	0	8.19	0	0	0	0	0.1	22.31	0.2	0.1	4.3	0
0.1	2.3	0	7.9	3.26	0.1	36.87	0.1	0.1	3.5	3.1	0	0.8	1	0.1	0.1	0.1
0.1	0.1	1.5	0.5	1	1.5	0.1	0	0.1	0.1	0.1	0	0.1	0.1	0.1	0.1	0
0.1	0.1	0	1.5	0.4	0.4	0	0	0.1	0	0	0	1	0.4	0.1	0.1	0
0.1	0.1	0	0	1.3	1.2	0	0.1	0.1	0	0	0	0.1	8.1	0	0.1	0
0.1	0.1	2.5	0	1	0.5	0	0	7.02	0	0	0	0.1	3.9	0.1	0.1	0.1
0	0	4.1	0	0	0.1	0	0	2.1	0	0	0	0.1	0.1	0	0.1	0.1
0	0	0	0	0	0	0	0	0	0	0	0	0	0	0	0	0
0.1	0	0	0	0	0	0	0	0	0	0	0	0	0.1	0	0	0
0	0	0	0	0	0	0	0	0	0	0	0	0	0	0	0.1	0
0	0	0	0	0	0	0	0	0	0	0	0	0	0	0	0	0
0	0	0	0	0	0	0	0	0	0	0	0	0	0	0	0	0
0.1	0	0	0	0	0	0	0	0	0	0	0	0	0	0	0	0
0	0	0	0	0	0	0	0	0	0	0	0	0	0	0	0	0
0.1	0	0	0	0	0	0	0	0	0	0	0	0	0	0	0	0
0.1	0	0	0	0	0	0	0	0	0	0	0	0	0	0	0	0
0.1	0	0	0	0	0	0	0	0	0	0	0	0	0	0	0	0
0.1	0	0	0	0	0	0	0	0	0	0	0	0	0	0	0	0
0	0	0	0	0	0	0	0.1	0	0	0	0	0	0	0	0	0
0	0	0	0	0	0	0	6	0	0	0	0	0	0	0	0	0.1
0	0	0	0	0	0	0	0.3	0	0	0	0	0	0	0	0	0
0.4	0	0	0	0	0	0	0	0	0	0	0	0	0.1	0	0.1	0
0.1	0	0	0	0	0	0	0	0	0	0	0	0.1	0.5	0	0.1	0
0	0	0	0	0	0	0	0	0	0	0	0	0	0.1	0	0.1	0
0.1	0	0	0	0	0	0	0	0	0	0	0	0	0	0	0	0
0.1	0	0	0	0	0	0	0	0	0	0	0	0.1	0	0	0.1	0
0.1	0	0.7	0	0.1	0.1	0	0	0.1	0	0	0	6.06	0.1	0.1	0.1	0
0.8	6.07	4.4	0	15.5	1.87	0	0	4.88	0	0	0	11.81	0.62	0.1	10.93	0
0.2	0.2	22.21	0.1	15.67	0.5	0	0	27.88	0	0	0.1	6.08	0.3	2.86	1.09	0.1
0.1	0	13.04	0.1	0.1	1	0	0	1	2.2	1.7	0.1	0.1	4	4.3	0.1	0.1
0.1	0	4.5	0	0	0.1	0	0	0.1	0.1	0.1	0.1	0.1	1	0.5	0.1	0.1
0	0	0.4	0	0	0.1	0	0	0.1	0	0	0	0.1	0.1	0.1	0.1	0.1
0	0	0	0	0.1	0	0	0	0	0	0	0.1	0.8	0.1	0.1	0	0.1
0	0	0.1	0	0.1	0.1	0	0.1	0	0	0	0.1	0.1	0.1	0	0.1	2.9
0.1	0.1	0.2	0	0.1	1.3	0	0.1	0	0	0	0.1	0.1	0.5	0.1	0	4.7
0.1	0.1	1.7	0	0	0.1	0	0	0.1	0	0	1.1	0.1	1	0.1	0.1	1.3
0.1	0	5.35	0	0.1	3.78	0	0	0.1	0	0	1.8	0.1	0.9	8.05	0.1	14.89
0	0	0.1	0	0	0	0	0.1	0.1	0	0	3.43	0	0.1	4.4	0	8.11
0.1	0	0	0	0	0	0	0.3	0	0	0	0	0	0	0	0.1	0.1
0	0	0	0	0	0	0	0	0	0	0	0	0	0	0	0.1	0
0	0	0	0	0	0	0	0	0	0	0	0	0	0	0	0	0
0	0	0	0	0	0	0	0	0	0	0	0	0	0	0	0	0
0.1	0	0	0	0	0	0	0	0	0	0	0	0	0	0	0.1	0
0.1	0	0	0	0	0	0	0	0	0	0	0	0	0	0	0.1	0
0.1	0	0	0	0	0	0	0	0	0	0	0	0.1	0.1	0	0.1	0
0.43	0	0	0	0	0	0	0	0	0	0	0	0.1	0.1	0	0.1	0
0.1	0	0	0	0	0.1	0	0	0	0	0	0	0.1	0	0	0.1	0
0	0	1.9	0	0	0.1	0	0.1	0.1	0	0	0	0.1	0.1	0.1	0.1	0
0.1	0	0	0	0	0	0	0	0	0	0	0.1	0	0.1	0.1	0.1	0
0.1	0	0	0	0	0	0	0	0	0	0	0	0	0	0	0.1	0
0	0	0	0	0	0	0.1	0	0	0	0	0	0	0	0	0.1	0
0	0	0	0	0	0	0	0	0	0	0	0	0	0	0	0	0.1
0	0	0	0	0	0	0	0.4	0	0	0	0.1	0	0	0	0	0.1
0	0	0	0	0	0	0	0.1	0	0	0	0.1	0	0	0	0	0
0	0	0	0	0	0	0	0.1	0	0	0	0	0	0.1	0	0	0
0.1	0	0	0	0	0	0	0	0	0	0	0	0	0	0	0	0
0.1	0	0	0	0	0	0	0	0	0	0	0	0	0	0	0	0
0	0	0	0	0	0	0	0	0	0	0	0	0	0.1	0	0	0
0.1	0	0	0	0	0	0	0	0	0	0	0	0	0	0	0	0
0	0	0	0	0	0	0	0	0	0	0	0	0	0	0	0	0
0	0	0	0	0	0	0	0	0	0	0	0	0	0	0	0	0
0	0	0	0	0	0	0	0	0	0	0	0	0	0	0	0	0
0.1	0	0	0	0	0	0	0	0	0	0	0	0	0	0	0	0
0	0	0	0	0	0	0	0	0	0	0	0	0	0	0	0	0
0	0	0	0	0	0	0	0	0	0	0	0	0	0	0	0	0
0	0	0	0	0	0	0	0	0	0	0	0	0	0	0	0	0
0	0	0	0	0	0	0	0	0	0	0	0	0	0	0	0	0
0	0	0	0	0	0	0	0	0	0	0	0	0	0	0	0	0
0	0	0	0	0	0	0	0	0	0	0	0	0	0	0	0	0
0	0	0	0	0	0	0	0	0	0	0	0	0	0	0	0	0
0	0	0	0	0	0	0	0	0	0	0	0	0	0	0	0	0
0	0	0	0	0	0	0	0	0	0	0	0	0	0	0	0	0
0	0	0	0	0	0	0	0	0	0	0	0	0	0	0	0	0
0	0	0	0	0	0	0	0	0	0	0	0	0	0	0	0	0
0.1	0	0	0	0	0	0	0	0	0	0	0	0	0	0	0	0
0	0	0	0	0	0	0	0	0	0	0	0	0	0	0	0	0
0.1	0	0	0	0	0	0	0	0	0	0	0	0	0	0	0.1	0
1.5	0	0	0	0	0	0	0	0	0	0	0	0	0	0	0.1	0
2.6	0	0	0	0	0	0.1	0	0	0	0	0	0	0	0	0.1	0
3.9	0	0	0	0	0	0.1	0	0	0	0	0	0.1	0.1	0	0.1	0
0.1	0	0	0	0	0	0	0	0	0	0	0	0	0	0	0.1	0
0.1	0	0	0	0	0	0	0	0	0	0	0	0	0	0	0	0
0.1	0	0	0	0	0	0	0	0	0	0	0	0	0	0	0	0
0	0	0	0	0	0	0	0	0	0	0	0	0	0	0	0.1	0
0	0	0	0	0	0	0.1	0	0	0	0	0	0.1	0	0	0.1	0
0.1	0.1	0	0	0.1	0	0	1.9	0	0	0	0	0.1	0.1	0	0.1	0
0.1	4.2	0	1	3.89	0.1	0	5	0	0.1	0.1	0.1	0.1	0.1	0	0.1	0
0	0.1	0	7.2	0.1	1.6	0.1	2.4	0.1	1.7	1.4	0	0	0.1	0.5	0	1.5
0	0.1	6.25	0.1	0	0.1	0	1.48	3.1	0.1	0.1	0.1	0	0.1	0	0	0.1
0	0	0.4	0.1	0	0	0	13.06	0.1	0.1	0.1	3.5	0	0.1	7.38	0	14.39
0	0.1	0	0.1	0	0	0	2.8	0	0.1	0.1	0.1	0	0	0	0	0
0	0	0	0	0	0.1	0	0	0	0	0	0	0	0	0	0	0
0	0	0	0.1	0	0	0	0	0	0.1	0.1	0	0	0	0	0	0
0	0	0	0	0	0	0	0	0	0	0	0	0	0	0	0	0
0	0	0	0	0	0	0	0	0	0	0	0	0	0	0	0	0
0	0	0	0	0	0	0	0	0	0	0	0	0	0	0	0	0
0	0	0	0	0	0	0	0	0	0	0	0	0	0	0	0	0
0	0	0	0	0	0	0	0	0	0	0	0	0	0	0	0	0
0	0	0	0.1	0	0	0	0	0	0.1	0.1	0	0	0	0	0	0
0	0.1	0	0.4	0	0	0	0	0	0.1	0.1	0	0	0	0	0	0
0	0	0	0	0	0	0	0	0	0	0	0	0	0	0	0	0.1
0	0	0	0	0	0.1	0	0.1	0	0	0	0.1	0	0	0.1	0	0.1
0	0	0	0	0	0	0	0	0	0.1	0.1	0	0	0	0	0	0.1
0.1	0	0	0	0	0	0	0	0	0	0	0	0	0	0	0	0
0.1	0	0	0	0	0	0	0	0	0	0	0.1	0	0	0	0	0
0.1	0	0	0	0	0	0	0	0	0	0	0.1	0	0	0	0	0
0	0	0	0	0	0	0	0	0	0	0	0.1	0	0	0	0	0
0.1	0	0	0	0	0	0	0	0	0	0	0.1	0	0	0	0	0
0.1	0	0	0	0	0	0	0	0	0	0	0.1	0	0	0	0.1	0
0.7	0	0	0	0	0.1	0	0	0	0.1	0.1	0.1	0.1	0.1	0	0.1	0
0.1	0	0	0	0	0.1	0	0	0	0.1	0.1	0	0	0.1	0	0.1	0.1
0.1	0	0	0	0	0	0	0	0	0.1	0.1	0	0	0.1	0	0.1	0.1
0.1	0.1	0	0.1	0	0	0	1.6	0	0.1	0.1	0	0	0.1	0	0.1	0
0.5	0	0	0	0	0.1	0	0	0	0	0	0	0	0	0	0.1	0
0.1	0	0	0	0	0	0	0	0	0	0	0.1	0.1	0	0	0.1	0
0.2	0	0	0	0	0	0	0	0	0	0	0	0.1	0.1	0	0.1	0
0.1	0	0	0	0	0	0	0	0	0	0	0	0	0.1	0	0.1	0
0.1	0	0	0	0	0	0	0	0	0	0	0	0	0.1	0	0.1	0
0.1	0	0	0	0	0	0	0	0	0	0	0	0	0	0	0.1	0
0.1	0	0	0	0	0	0	0	0	0	0	0	0	0	0	0	0
0.1	0	0	0	0	0	0	0	0	0	0	0	0	0	0	0.1	0
0.1	0	0	0	0	0	0	0	0	0	0	0.1	0	0	0	0.1	0
0.1	0	0	0	0	0	0	0	0	0	0	0.1	0	0	0	0.1	0
0.8	0	0	0	0	0	0	0	0	0	0	0.1	0	0	0	0.1	0.1
0.1	0	0	0	0	0	0.1	0	0	0	0	0.9	0	0.1	0	1	0
0.1	0	0	0	0	0	0.1	0	0	0	0	0.1	0.1	1.54	0	0.1	0
0.1	0.1	0	0	0.1	0	0	0	0	0.1	0.1	0.1	0.1	0	0	0.1	0
0.1	0	0	0	0.1	0	0	0	0	0	0	0.1	0.4	0.1	0	0.1	0
0.1	0	0	0	0.1	0	0	0	0	0	0	0.1	2.5	0.1	0	0.7	0
0.1	0.1	0	0	2.3	0	0	0	0	0	0	0.1	2	0.1	0	0.2	0
0.1	0.1	0	0	0.1	0	0	0	0	0	0	1.9	0	0	0	0	0
0.1	0.1	0	0	0	0	0	1.5	0	0	0	18.02	0	0.1	0	0.1	0.1
2.7	0.1	0	0	0	0.1	0	5.3	0	0	0	0.1	0	0	0	0.1	0.1
4.5	0.1	0	0	0	0.1	0	0.4	0	0	0	0.1	0.1	0	0	0.1	0.1
0.4	0	0	0	0.1	0.1	0	0.1	0	0	0	7.92	0.1	0.1	0	0.1	0
0.1	0.1	0	0.1	0.1	0.1	0	0	0	0	0	0.8	0.1	0.1	0	0.1	0
0.1	0.1	0	0	0	0	0	0	0	0.1	0.1	0.1	0.1	0.1	0	0.1	0
0.1	0	0	0	0	0	0	0	0	0.1	0.1	1.1	0	0	0	0.1	0.1
0	0	0	0	0	0	0	0	0	0	0	1.6	0.1	0.1	0	0.1	0
0.1	0	0	0	0	0	0	0	0	0	0	0.1	0	0.1	0	0.1	0
0.1	0	0	0.4	0	0	0.1	0.1	0	0.4	0.3	0.6	0	0.1	0	0	0
0	0	0	8.78	0	0	0.1	6.2	0	1.7	1.33	0.1	0	0	0	0	0.1
0	0.1	0	0.4	0	0	0.1	0.1	0.1	0.1	0.1	4.7	0	0	0.1	0	0.3
0	0.1	0	0	0	0	0	0.1	0.1	0	0	7.96	0	0	0	0	0.3
0	0	0	0	0	0	0	0	0	0	0	16.41	0	0	0	0	0.1
0.1	0	0	0	0	0	0	0	0	0	0	7.42	0	0.1	0	0	0
0.1	0.1	0	0	0	0	0	0.1	0	0	0	0.1	0	0	0	0.1	0
0.1	0.1	0	0	0	0	0	20.62	0	0	0	0.1	0	0	0	0	0.1
0.1	0	0	0	0.1	0.1	0	40.77	0	0.1	0.1	5.73	0	0	0.1	0	0.1
0.1	0.1	0	0.1	0	0.1	0	30.16	0	1	0.8	11.15	0.1	0	0.1	0	0.3
0.1	0	0	0.1	0	0.1	0	11.74	0	0.1	0.1	0.1	0	0	0.1	0	0
0.1	0	0	0	0	0	0	0	0	0.1	0.1	0.1	0	0	0.1	0	0
0	0	0	0	0	0	0	0	0	0	0	0.1	0	0	0	0	0
0	0	0	0	0	0	0	0	0	0	0	1.6	0	0	0.1	0	0
0.1	0	0	0	0	0	0	0.1	0	0	0	0.9	0	0	0	0.1	0
0.1	0	0	0	0	0	0	0.1	0	0	0	1.6	0	0	0.1	0	0
0.1	0	0	0	0	0	0	0.1	0	0	0	3.1	0	0	0	0	0.1
0	0	0	0	0	0	0.1	0.1	0	0	0	18.3	0	0	0	0	0
0	0	0	0	0	0	0	0	0	0	0	1.1	0	0.1	0.1	0	0
0.1	0	0	0	0	0	0	0	0	0	0	0.1	0	0	0	0	0
1.1	0	0	0	0	0	0	0	0	0	0	0.1	0	0	0	0.1	0
0.1	0.1	0	0	0	0	0	0	0	0	0	0.3	0.1	0	0	0.1	0
0.1	0	0	0	0	0.1	0	0	0	0	0	0.18	0.1	0	0	0	0
0.3	0	0	0	0	0	0	0	0	0	0	0.4	0.1	0	0	0.1	0
0.1	0	0	0	0	0.1	0.1	0	0	0	0	0.1	0	0	0	0.1	0
0.1	0.1	0	0	0	0.1	0.1	0	0	0	0	0.1	0	0	0	0	0
0	0	0	0	0	0.1	0	0	0	0.1	0.1	0.1	0	0	0	0	0
0.1	0	0	0	0	0.1	0	0	0	0	0	11.1	0	0.1	0	0	0
0	0	0	0	0	0	0.1	0	0	0	0	13.3	0	0.1	0	0.1	0
0.1	0	0	0	0	0	0.1	0	0.1	0	0	0.1	0	0	0	0.1	0
0.1	0	0	0	0	0.1	0.1	0	0	0	0	0.1	0	0	0	0.1	0.1
0.1	0.1	0	0.1	0	0.1	0.1	0.1	0	0.1	0.1	5.44	0	0	0	0.1	0
0.1	0.1	0	0	0	0	0.1	0.1	0	0	0	0.3	0	1.7	0.1	0	0
0.1	0	0	0	0.1	0.1	0.1	0.1	0	0	0	0	0.1	0.9	0	0.1	0.1
12.81	0	0.8	0	0	0.1	0.1	6	0	0	0	0.1	0.1	9.3	1.1	0.1	8.8
3	0	15.3	0	0.1	95.13	0.1	3.98	0.6	0	0	0.1	0.1	9.31	4.1	0.1	9.79
0.2	0.1	5.1	0	0.1	138.71	0.1	0.4	69.68	0.1	0.1	0.1	0.1	0.1	0.1	0.1	0.7
0.1	0	13.5	0	0.6	30.24	0.1	0.2	82.67	0.1	0.1	0.1	0.1	5	1.5	0.6	0.1
0.4	0.1	109.6	0	0.1	9.93	0.1	0.1	39.85	0.1	0.1	3	0.1	0.1	28.71	0.1	11.15
0.1	0	22.13	0	0	0.1	0.1	14.84	0	0	0	53.89	0.1	0.1	52.17	0.1	5.1
0.1	0	0.1	0	0	0.1	0.1	10.5	0	0	0	47.24	0.1	0.1	0.1	0.1	0.1
0.8	0	0	0	0	0	0.1	0.1	0	0	0	15.73	0.1	0.1	0	0.1	0.1
0.9	0	0	0	0	0.1	1	0	0	0	0	21.21	0.1	0.1	0	0.1	0
4.9	0	0	0	0	0.1	0.1	0.1	0	0	0	8.4	0.1	0.1	0.4	0.1	0.1
7.6	0	3.6	0	0	0.1	0.1	4.95	0	0	0	17.64	0.1	0	9.26	0.8	8.91
5.41	0	0.7	0	0	0.1	0.1	77.77	0	0	0	1.2	0.1	0.1	0.1	0.1	47.31
3.6	0	2.1	0	0	0.1	0.1	89.5	0	0	0	50.73	0.3	0.1	18.4	0.1	21.26
1.4	0	0.1	0	0.1	0	0.1	38.92	0	0	0	40.52	0.26	0.1	4.8	0.1	0.4
1.6	0	0	0	0.1	0	3.2	4.6	0	0	0	24.41	0.1	0.1	9.18	0.1	0.1
1.3	0	0.1	0	0.1	0	11.45	27.46	0	0	0	12.8	0.1	0.1	1.2	0.1	0.1
4.5	0	0.1	0	0.1	0	6.3	54.27	0	0	0	25.16	0.3	0.1	35.21	0.1	1.3
16.71	0	6.25	0	0	0.1	1.1	14.11	0	0	0	80.06	0.2	0.1	50.26	4.19	2.3
25.15	0	8.6	0.1	0.1	0.1	0.1	7.1	0	0	0	56.13	0.7	0.1	1.8	1.7	2.7
30.15	0.1	0.1	0	0.1	0.1	0.7	11.67	0	0.1	0.1	26.72	0.6	0.1	0.1	9.2	2.4
7.85	0	0	0	0.1	0.2	0.1	1.1	0	0	0	16.29	0.8	0.1	9.4	3	0.1
8.6	0	0.1	0	0.1	0.1	0.1	0.1	0	0.1	0.1	48.29	0.2	0.1	8.31	1.33	0.7
9.1	0	9.2	0	0.1	0.4	0.1	10.5	0	0.1	0.1	15.94	0.1	1.1	17.03	0.1	3.2
4.11	0	15.6	0	0	22.58	0.1	4	1.3	0.1	0.1	0.6	0.1	2.2	0.3	0.1	9.1
8.1	0.1	0	0	4.9	78.67	0.1	5.27	1.9	0.1	0.1	0.1	9.89	18.18	0.1	0.1	11.3
7.35	4.35	1.8	0	0.5	73.55	0.1	4.8	0	0.1	0.1	10.53	3.71	0.2	6.25	2	9.42
3.5	4.9	2.66	0.1	0.4	83.7	0.8	13.36	2.8	0.2	0.1	9.08	2.2	7.31	4.7	1.2	18.53
3.9	0.3	0.1	0.1	11.81	110.01	6	25.46	0.1	0.1	0.1	7.1	1	27.87	5.2	0.1	38.51
2.9	5.7	0.1	0.1	39.7	105.16	5.2	10.57	1	0	0	0.1	8.19	19.72	2.9	12.25	18.67
11.43	12.47	4	0	33.51	7.3	11.9	6.5	9.75	0	0	6	16.99	1.3	2.86	6.67	16.88
0.5	76.22	5.1	0	19.85	0.9	8.9	13.38	2.55	0.1	0.1	7.99	1.4	0.6	0.1	0.1	10.05
0.1	35.15	0.6	15.09	5.6	0.1	5.81	13.5	2.9	5.71	5.6	23.02	0.2	0.1	0.1	0.1	13.13
0.1	16.37	55.31	0.9	0.1	0.2	11.49	20.89	16.4	3.5	3.03	24.51	0.8	0.1	33.44	0.1	23.07
0.1	0.1	49.17	1.4	0.4	0.1	8.41	0.15	11.95	10.3	11.17	20	3	0.1	47.09	0.1	9
1.7	17.6	68.86	24.02	0.2	0.1	1.7	1.5	18.23	12.31	13.46	8.1	10.4	1.6	19.15	0.1	0.9
0.1	47.36	22.27	4.6	28.36	0.6	0.5	5.2	12.6	1.7	1.3	0.1	6.77	6	0.1	0.5	0.1
0.1	46.56	0.1	18.04	40.02	4.27	7.6	0.1	0.1	18.09	20.54	0.1	33.92	18.12	0.1	3.8	1.1
2.2	6.2	0.1	0.1	5.81	26.39	5.87	0.7	0.1	0.1	0.1	2.6	13.03	0.73	3.6	0.7	5.3
0.1	5.3	2.93	2.1	1	24.26	1.4	17.36	1.7	6.5	6.2	2.2	1.7	0.9	6.9	0.1	18.6
0.1	3.8	2.2	0.48	0.6	30.94	3.69	18.61	0.1	2.8	2.3	15.1	1.9	0.2	4.8	0.1	19.67
0.1	0.1	6.7	0.5	2.6	25.66	0.1	5.92	5.85	1.7	1.3	6.4	3.32	3.2	7.8	0.1	21.39
0.1	0.3	4.96	15.79	10.44	7.49	0.3	9.2	7.29	8	7.9	3.5	1.3	0.1	10	0.1	11.21
0.1	0.7	21.75	1.6	0.1	7.64	0.1	23.43	0.1	7.91	7.8	12.3	0.1	0.1	1.5	0.1	4.7
0.1	0.1	84.28	0.1	0.1	1.3	0.1	41.61	6.6	0.2	0.2	2	0.1	0.1	8.45	0.1	19.56
0.1	0.1	29.59	13.29	0.8	6.3	0.1	12	6.22	14.01	15.83	0.8	0.1	0.1	2.64	0.1	25.35
0.2	0.4	0.1	0	0.6	33.06	4	33.33	9.94	1.2	0.9	7.3	1.1	0.1	0.1	0.1	19.69
1.7	0.1	34.76	0	0.1	3.1	1.68	6.2	3.4	0	0	26.48	2.5	0.2	5.5	0.1	6
1.7	1.8	26.51	7.25	0.1	4.89	4.2	23.58	4.12	37.66	43.94	14.39	5.5	0.3	6.1	0.1	24.96
0.1	5.7	9.7	0.1	4.02	37.74	2.5	26.94	8.3	23.18	24.56	0.9	0.1	0.1	4.8	0.1	18.21
0.1	1	1.5	0.1	6.5	38.71	5.2	21.21	5.87	0.1	0.1	3.2	0.8	0.1	4.2	0.1	5.8
0.1	0.1	8.53	5.6	0.1	9.72	0.4	27.97	13.13	3	2.4	0.8	0.2	0.1	11.6	0.1	14.7
0.4	0.1	24.56	2.4	1.1	0.3	0.9	41.76	3.7	1	0.8	2.3	1	0.1	1.1	0.1	22.53
1.3	0.1	37.35	0.1	0.1	1.7	0.1	21.4	0.4	0.1	0.1	1.1	1.4	0.1	0.1	0.1	22.1
0.1	0.1	1.55	0.1	0.1	0.1	0.1	13.83	0.9	0.1	0.1	0.1	0.4	0.1	10.7	0.1	10.6
0.1	0.1	7.4	10.36	0.1	0.1	0.1	14.29	0.2	12.29	13.16	0.5	0.1	0.1	1.7	0.1	11.15
0.2	0.1	12.2	0	0.1	0.1	0.1	39.45	0.5	0.1	0.1	5.7	0.1	0.1	12.3	0.1	18.6
0.1	0.3	0.1	0.3	0.1	0.1	0.1	58.87	0.1	0.1	0.1	2.7	0.1	0.1	1.9	0.1	21.81
0.1	0.1	0.1	0	0.5	0.4	6.3	70.28	0.1	0	0	2.6	1.8	0.6	0.1	1.1	44.35
1.5	0.5	20.46	0.1	0.1	16.5	1.5	25.37	5.4	5.79	5.6	6.9	8.04	0.1	9.12	0.1	17.63
3.9	15.1	0.4	0.6	4	32.39	1.4	3.95	28.34	41.72	47.59	0.3	0.8	0.1	12	0.1	5.32
1.8	20.09	14.01	4	0.2	6.71	5.3	2.47	17.17	53.64	57.06	0.1	1.7	0.1	0	0.6	0.2
4.5	10.4	0.5	7.29	0.1	0.1	2.6	1.4	7.6	36.69	43.22	0.1	0.2	0.1	0.1	0.1	0.1
3.9	0.1	5	0.66	0.1	0.1	0.1	0.1	1	34.59	39.45	7.3	0.1	4.7	8.76	0.4	0.2
8.3	0.1	2.6	0.1	0.1	5.6	0.1	0.1	2.07	5.3	5	1.3	0.1	24.43	13.3	0.1	0.1
16.83	0.1	8.57	0.1	0.1	0.2	0.1	0.1	6.8	0.1	0.1	5.3	2.3	61.38	4.42	24.55	0.1
11.18	2.43	0.7	0.4	0.1	3.1	0.1	0.1	0.6	0.1	0.1	16.98	0.2	41.9	2.4	23.98	0.1
20.87	6.59	0.1	0.1	0.1	0.2	0.1	0.1	0.17	5.85	5.7	25.05	0.1	44.5	8.8	24.9	0.1
24.02	3.5	0.1	0.6	4	6.91	2.4	0.1	0.9	8.4	8.2	2.8	5.1	35.62	4.31	5.7	0.1
19.84	9.74	0.1	22.46	8.9	0.9	0.2	0.1	1	36.69	43.22	0.1	9.81	4.5	0.1	9.09	0.1
9.9	3.5	0.1	1.22	12.56	0.1	0.1	0.1	0	0.6	0.4	0.1	2.8	15.2	0.1	6.69	0.1
8.7	1.2	0.1	1.8	0.7	0.1	0.1	0.1	0	10.05	10.43	1.03	9.56	74.85	0.1	15.07	0.3
3.32	0.2	0.1	1	5	0.1	0.1	0.2	0.1	10.3	11.11	0.1	6.76	166.71	0.9	56	0.1
9.9	0.1	0	1.1	4.2	0.1	0.1	0.1	0	0.1	0.1	0.1	0.4	77.93	0.1	34.96	0.1
11.94	0.1	0	0.1	4	1.9	0.1	0.4	0	0	0	0.1	0.1	76.2	0.1	5.16	1.3
7.6	0.1	0	0.1	18.52	32.19	0.1	0.5	0.1	2.61	2.1	0.1	8.35	13.37	0.1	26.27	0.7
1.7	0.3	0.1	13.61	24.52	42.84	0.49	1.1	0	17.43	19.91	0.1	5.6	13.16	0.1	50.01	7.3
1.99	0.2	0.1	0.3	41.65	34.41	1.4	1.4	0.2	0	0	0.1	9.1	6	0.1	23.6	18.05
2	9.6	0.1	0	41.15	8.76	1.9	9.52	9.3	0.1	0.1	0.5	0.3	10.06	0.1	0.9	8.4
0.9	16.12	1.1	0	11.4	8.77	0.37	13.73	2.7	0.1	0.1	2.2	0.1	1.8	0.1	0.2	15.89
0.6	0.1	0.1	0.7	4.4	17.02	1	14.76	0.1	0	0	0.1	0.1	13.89	0.1	0.1	17.64
0.6	0.7	0.1	0.9	0.1	14.34	0.9	5	1.3	0.1	0.1	0.1	0.4	8.8	0.1	0.1	21.38
1.1	0.1	0.1	13.4	0.1	66.02	3	1.8	0.1	15.06	17.22	0.1	1.3	0.1	0.7	0.1	13.42
1.9	11.95	0.1	9.78	24.11	22.17	9.24	0.4	0.1	0.1	0.1	0.1	2.5	0.7	0.1	1.6	1.03
7.9	12.25	0.1	0	21	8.9	8.41	0.4	0.1	0	0	1	0.6	0.1	0.1	5.01	4.77
2.4	12.8	0.1	3	1.8	17.77	10.21	0.1	4.3	0.1	0.1	1.6	1.6	0.1	0.1	8.4	7.8
0.1	13.8	0.1	4	7	34.68	4	0.3	0.1	21.21	23.17	4.9	1.4	0.1	4.59	0.1	0.7
0.1	0.1	0.1	0	18.48	24.3	2.6	0.1	0.6	0.4	0.3	1.8	0.5	0.1	0.1	0.1	0.1
0.2	1.8	0.1	0	30.49	5.8	0.1	0.1	1.4	0.1	0.1	0.3	6.01	0.2	0.2	2.1	0.1
0.3	2.23	0.1	0.3	26.45	1.9	0.1	0.3	0.1	2.8	2.3	0.7	0.2	1	3.1	3.8	0.1
2.1	6	0.1	7	5	0.1	0.1	0.1	0.4	16.2	19.05	0.1	0.8	16.29	0.1	5.87	0.1
4.1	0.4	0.1	13.86	0.1	3.3	0.1	0.1	0.1	14.3	16.19	0.1	1.7	1.7	0.1	11.52	0.1
2.8	0.3	0	16.33	5.5	0.1	0.1	0	0.1	5.1	4.6	0	2.4	27.74	0	2.36	0.1
23.19	0.1	0	4.7	2.39	0.1	0.1	0.1	0	0.1	0.1	0.1	8.03	78.2	0	53.05	0
23.98	0	0	0.1	0.1	0	0	0.1	0	4	3.7	0.1	1.9	77.13	0	130.44	0
11.01	0	0	0	0	0.1	0	14.5	0.1	0	0	4.63	29.99	12	0	132.6	0
0.6	0.1	2.8	0	0.1	3.08	0	8	0	0.1	0.1	5	0.1	1	20.83	24.6	0.1
1.3	0.1	0.1	0.1	10.55	4.1	0	0.2	1	4	3.71	0.1	1.7	6.08	0.1	8.3	0.1
0.2	0.4	0.1	0.1	17.59	0.9	12	2.5	0.1	0.2	0.2	1.38	43.02	59.93	0.1	11.12	0.7
0.4	0.4	0.1	0	16.94	1.5	1.7	0.5	0.1	0.4	0.3	8.1	35.54	0.9	2.8	0.1	0.1
0.1	6.8	2.8	0.1	14.82	5.17	0.1	7	0.3	1.8	1.4	10.2	15.43	0.1	12.7	0.6	1.2
0.1	1.9	4.8	1.4	4.8	12.2	0.1	4.5	8.5	2.1	1.6	21.3	1.4	0.1	13.5	0.2	5.1
0.1	0.1	20.07	0	15.58	12.52	0.1	2.44	12.8	0.1	0.1	0.1	0.5	0.84	12.99	0.1	15.1
0.1	0.1	15.4	0.1	1	19.73	0.1	2.6	8.5	0	0	0.1	0.1	46.26	2	0.1	6.04
2.8	0.1	3.9	0	8.1	7.81	0.1	0.2	8.89	0	0	3.4	1.6	1.69	0.6	0.1	0.1
7.46	0	0.1	0	0.8	4.1	0	11.89	0.5	0	0	14.7	9.93	22.77	0.5	19.83	0.1
38.95	0	4.96	0	0.1	13.1	0	9.8	0.1	0	0	5.43	16.3	14.68	14.4	26.09	1.3
1.3	0.1	10.1	0	0.1	11.54	0.1	8.68	0.17	0	0	0.1	8	24.37	2.29	19.9	6.52
0.8	0.1	9.67	0	0.1	8.02	0.1	8.25	1.2	0	0	1	4.36	14.42	6.81	0.2	4.67
0.4	0.1	0.1	0	0.1	0.5	0.1	16.67	0.6	0	0	0.7	1.9	3.3	0.1	4.6	16.24
0.1	0.1	0	0	0.1	6	0.1	9.3	0	0	0	1.41	2.82	0.1	0	0.3	11.44
0.1	0.1	0	0	3.62	1.84	2	3.8	0	0	0	0	32.43	11.8	0	7.36	0.6
11.8	0	0	0	0.1	0.1	4.1	2.4	0	0	0	0	0.1	0.1	0	20.8	0.2
64	0	0	0	0.1	0.1	0.1	3	0	0.2	0.1	0.7	0.1	7.5	2.2	75.46	0.1
17.57	0.1	0.1	13.88	0.1	0.1	0	2.4	0	26.79	29.98	6	0.1	33.18	8.5	32.23	0.1
7.57	0.1	0.4	0	0.1	0.1	12.33	2.7	0.1	0	0	0.1	0.2	24.75	0.7	17.42	12.21
50.68	0	0.1	0	0.1	0.1	1.5	0.1	0.1	0.1	0.1	2.24	0.1	3.5	6.71	36.88	11.3
77.61	0	5.6	0	0.1	0.4	0	1	0.1	0	0	0.1	0.1	0.1	8.5	1.4	1
10.87	0	1.92	0	0.1	1.5	0	28.26	0.1	0	0	0.1	0.1	2.7	0.1	0.1	11.3
3	0	3	0	0.2	10.31	0	9.77	0.5	0	0	6.9	4	7.9	9.51	0.1	7.4
0.4	0.1	1.7	0	9.7	11.9	0.1	3.3	0.1	0	0	1.2	47.06	38.72	2.3	0.1	2.2
0.1	0.1	7.33	0	2	18.6	0.1	0.4	8.5	0	0	0.1	46.39	35.99	0.1	24.29	0.2
0.1	0.1	10.3	0	2.2	22.93	0	0.1	35.33	0	0	0.1	33.82	22.17	4.77	3.5	0.1
0.1	0.1	22.1	0	0.1	19.71	0	0.1	40.98	0	0	0.1	1.9	13.36	2.4	0.1	0.1
0.1	0.1	12.3	0	0.1	18.44	0.1	0.1	34.88	0	0	0.1	0.1	0.1	0.6	0.1	0.1
0.1	0.6	0.1	0	38.86	7.6	0.1	0.9	8.4	0	0	0.1	0.1	0.1	0.1	0.1	0
0.1	10.27	0	0	39.34	2.1	0.1	9.7	0.37	0	0	0.1	0.7	0.1	0	0.1	0.67
0.1	0.3	1.5	0	1.1	1.1	64.52	0.1	0.75	0.1	0.1	0.1	0.1	0.1	0.1	0.1	0.1
0.1	0.1	0	0	5.4	0.1	36.15	0.1	3.8	0.5	0.4	0.1	0.1	0.1	2.4	0.1	0.1
0.1	0.1	0	4.8	1.5	0.1	0	6.7	0	3.4	3	0.1	0.8	2	0	0.1	0.1
0.1	0.1	0	1.6	0.4	0	0.1	20.84	0	2.8	2.3	0.1	6.66	0.2	0.1	0.1	11.43
0.1	1.1	0.1	2	0	0.1	0.1	33.23	0	1.7	1.3	3	0.2	0.1	4.1	0.1	10.64
0.1	0	0	0	0	0.1	0.1	15.96	0	0	0	0.1	0.1	0.1	0.1	0.1	12.96
2	0	0	0	0.9	0.1	0.9	6	0	0	0	0.1	0.1	0.6	0	0.1	22.17
0.1	0.1	0	0	1.37	3.5	0.1	0.1	0.1	0	0	0	0.3	1.3	0	0.7	12.21
0.1	0.1	11.06	0	0.1	0.1	0.1	0.4	0.7	0	0	0.1	1.7	0.3	2.2	0.1	6.5
0.1	0.1	0.53	0	0.1	0.1	0	0.1	0.7	0.1	0.1	0.1	0.1	1.7	0.1	0.1	7.1
0	0.8	0	0.5	1.4	0.2	0	2.6	0	0	0	0.1	0.1	0.1	0	0.1	1.9
0.1	0.1	0	0	3.26	0.1	0	3.7	0.1	0	0	0.1	2.1	0.1	0.2	0.1	3.1
1.2	0	0	0	0	0	0	0.1	0	0	0	0	0.1	0.1	0	0.1	0.1
0.1	0	0	0	0	0	0	0	0	0	0	0	0	0	0	0.1	0
0.1	0	0	0	0	0	0	0	0	0	0	0	0	0	0	0.1	0
2	0	0	0	0	0	0	0	0	0	0	0	0	0.1	0	0.1	0
0.1	0	0	0	0	0	0	0	0	0	0	0	0.2	0.6	0	0.1	0
0.1	0	0	0	0	0	0	0	0	0	0	0.1	0.1	0.1	0	0.1	0
0.1	0	0	0	0	0	0.7	0	0	0	0	0	0.1	0.1	0	0.2	0
0.2	0	0	0	0	0	0	0	0	0	0	0	0.1	0.1	0	0.4	0
0.1	0	0	0	0	0	0	0	0	0	0	0.1	0	0	0	0.1	0
0.1	0	0	0	0	0	0	0	0	0	0	0	0	0	0	0	0
0.1	0	0	0	0	0	0	0	0	0	0	0	0	0	0	0.1	0
0.1	0	0	0	0	0	0	0	0	0	0	0	0	0	0	0.1	0
0.1	0	0	0	0	0	0	0	0	0	0	0	0	0	0	0.1	0
0.1	0	0	0	0	0	0	0	0	0	0	0	0	0	0	0	0
0	0	0	0	0	0	0	0.1	0	0	0	0	0	0	0	0	0
0	0	0	0	0	0	0	0	0	0	0	0	0	0	0	0	0
0.1	0	0	0	0	0	0	0	0	0	0	0	0	0	0	0	0
0.1	0	0	0	0	0	0	0.1	0	0	0	0	0	0	0	0	0
5.8	0	0	0	0	0.1	0	3.95	0	0	0	0	0	0.1	0	0	0.1
24	0	0.1	0	6.99	1.9	0	1.5	0.1	0	0	0.1	17.95	4.92	0	6.96	0.1
0.5	0.1	0.1	0	3.6	1.5	0	0.1	0.1	0	0	0.1	4.5	0.1	0	2.4	0.5
0.1	1.8	0	0.1	2.65	1.2	0	0.1	0.1	0	0	0	0.6	0.5	0.1	0.6	0.2
0.8	7.41	0	7	0.9	0.1	0	0.1	0.1	0.1	0.1	0.1	0.1	2.7	4.6	0.4	0.2
0.1	0.1	0	0.1	0.1	2.7	0	0	0.1	0.1	0.1	0.1	0.1	1.3	3	0.1	0.1
0	0.2	0	0	0.1	0.1	0	0	0	0.1	0.1	0.1	0.1	0	0	0.1	0
0.1	0	0	0	0	0	0	0	0	0	0	0.1	0.1	0	0	0.1	0
0	0	0	0	0	0	0.1	0	0	0	0	0	0	0	0	0.1	0
0	0	0	0	0	0	0.1	0.1	0	0	0	0	0	0	0	0	0
0	0	0	0	0	0	0	0.3	0	0	0	0	0	0	0	0	0.1
0	0	0	0	0	0	0	15.1	0	0	0	0	0	0	0	0	1.3
0	0	0	0	0	0.1	0	17.15	0	0	0	0.4	0	0	0.1	0	12.9
0	0	5.2	0	0	0	0	14.88	0.1	0	0	4.4	0	0	4.3	0	11.75
0	0	2.79	0	0	0.1	0	20.94	0.4	0	0	3.3	0	0	2.7	0	7.3
0	0	0	0	0	0.1	0	29.39	0.1	0	0	0.4	0	0.1	0.9	0	16.39
0.1	0	3.18	0	0	0	0	18.9	0	0	0	0.1	0	0.1	2.57	0.1	3.9
0.1	0	0.2	0	0	0	0	1.11	0	0	0	0.1	0	0	0.5	0.1	0.2
0.1	0	0	0	0	0	0	0.1	0	0	0	0.1	0	0	0.1	0.1	0.1
0	0	0	0	0	0	0	0.1	0	0	0	0	0	0	0	0	0
0	0	0	0	0	0	0	0	0	0	0	0	0	0	0	0	0
0	0	0	0	0	0	0	0.1	0	0	0	0	0	0	0	0	0
0	0	0.1	0	0	0.1	0	11.3	0.37	0	0	0	0	0.1	0.1	0	3.8
0	0	16.74	0	0	0.1	0	4.7	0.5	0	0	0.1	0	0	6.35	0	11.39
0	0	0	0	0	0	0	1.65	0	0	0	0.1	0	0	4.2	0	1.6
0	0	0	0	0	0	0	0.9	0	0	0	0.1	0	0.1	0	0	0.22
0.1	0	0	0	0	0	0	0	0	0	0	0.1	0.1	0.1	0.1	0	0.1
0.1	0	0	0	0	0.1	0	0	0	0	0	0.1	0.1	0.1	0	0.1	0.1
0	0	0	0	0	0	0	0	0	0	0	0	0.1	0.1	0	0.1	0
0	0	0	0	0.1	0	0	0	0	0	0	0	0.1	0.1	0	0.1	0
0.1	0.1	0	0	0.1	0	0	0	0	0	0	0	0.1	0	0	0.1	0
0	0.1	0	0	0.1	0	0	0	0.1	0	0	0	0.1	0	0	0.1	0
0	0	0	0	0.1	0	0	0	0	0	0	0	0.1	0	0	0.1	0
0	0	0	0	0	0	0	0	0	0	0	0	0.1	0	0	0	0
0.1	0	0	0	0	0	0	0	0	0	0	0	0.1	0	0	0.1	0
0	0	0	0	0	0	0.1	0	0	0	0	0	0	0	0	0.1	0
0	6.9	0	0.1	0.1	0	0.1	0	0	0	0	0	0	0	0	0.1	0
0.1	1	0.1	0.1	0.1	0.1	0	0.1	0.1	0	0	0	0.1	0.1	0	0.1	0
0	0	0	0	0	0	0	0	0	0	0	0	0	0.1	0	0.1	0
0	0	0	0	0	0	0	0	0	0	0	0	0.1	0.1	0	0.1	0
0	0	0	0	0	0	0	0	0	0	0	0	0.1	0	0	0.1	0
0	0	0	0	0.1	0	0	0	0	0	0	0	0.1	0.1	0	0.1	0
0	0	0	0	0.1	0	0	0	0	0	0	0	0.1	0.1	0	0.1	0
0	0	0	0	0.1	0	0	0	0	0	0	0	0.2	0	0	0.1	0
0.1	0	0	0	0.1	0.1	0	0	0	0	0	0	0.1	0	0	0	0
0.1	0	0	0	0	0	0	0	0	0	0	0	0	0	0	0.1	0
0	0	0	0	0	0	0	0	0	0	0	0	0	0	0	0.1	0
0.1	0	0	0	0.1	0	4.4	0	0	0	0	0	0.1	0.1	0	0.1	0
0	2.9	0.1	0.1	18.17	0.1	0	0	1	0	0	0	29.41	1.1	0	0.1	0
0.1	18	0.1	45.69	12.62	0.1	0.1	0	0.9	25.42	27.5	0	7.3	0.1	0	0.1	0
0.1	0.1	0.3	0.2	12.56	0	0.8	0	7.4	1.8	1.4	0	5	0	0	0.1	0
0	12.38	0.1	0.7	17.33	0	0.1	0	1.4	0.1	0.1	0	0.1	0.1	0	0	0
0	0.1	3.39	0.1	5	0.4	0	0	8.2	11.08	11.98	0	1.7	0	0.1	0	0
0	0.1	6.5	0.1	0.1	2.54	0	0	4.1	0.1	0.1	0.1	1.7	0.1	0.1	0.1	0
0.1	0	0.9	0	0	0.1	0	0	0	0	0	0.12	0.1	0.1	6.9	0.1	0.7
0	0	0	0	0	0	0	0.1	0	0	0	0	0.1	0	0	0.1	0.1
0	0	0	0	0	0	0	0.1	0	0	0	0	0.1	0	0	0.1	0
0	0	0	0	0	0	0	0	0	0.1	0.1	0	0.1	0	0	0.1	0
0	0	0	0.1	0	0	0	0	0	0.1	0.1	0	0.1	0	0	0.1	0
0	0	0	0	0	0	0	0	0	0	0	0	0.1	0	0	0	0
0	0	0	0	0	0	0	0	0	0	0	0	0.1	0	0	0	0
0	0	0	0.6	0.1	0	0	0	0	5.3	4.9	0	0	0	0	0.1	0
0	0	0	0	0	0	0	0	0	0	0	0	0	0	0	0.1	0
0	0.1	0	0.1	0	0	0	0	0	0.1	0.1	0	0	0	0	0	0
0	0.1	0	21.1	0.6	0	0	0	0	28.86	32.89	0	0.1	0	0	0.1	0
0	0.1	0	0.9	0.5	0	0	0	0.1	2.79	2.26	0	0.1	0	0	0	0
0	0.1	0	0	0.1	0.1	0	0	0.1	0	0	0	0.1	0	0	0.1	0
0	0	0	0	0	0	0	0	0	0	0	0	0	0	0	0	0
0	0	0	0	0	0	0	0	0	0	0	0	0	0	0	0	0
0	0	0	0	0	0	0	0	0	0	0	0	0	0	0	0	0
0	0	0	0	0	0	0	0	0	0	0	0	0	0	0	0.1	0
0.1	0	0	0	0	0	0	0	0	0	0	0	0	0	0	0.1	0
0.1	0	0	0	0	0	0	0	0	0	0	0	0	0.1	0	0.1	0
0.1	0	0	0	0	0	0	0	0	0	0	0	0	0.1	0	0.1	0
0	0	0	0	0	0	0	0	0	0	0	0	0	0	0	0.1	0
0	0	0	0	0	0	0	0	0	0	0	0	0	0	0	0	0
0	0	0	0	0	0	0.1	0	0	0	0	0	0	0	0	0	0
0	0.1	0	2	0	0	0.1	0	0	0.1	0.1	0	0	0	0	0	0
0	0	0	0	0	0	0	0	0	0	0	0	0	0	0	0	0
0	0	0	0	0	0	0	0	0	0	0	0	0	0	0	0	0
0	0	0	0	0	0	0	0	0	0	0	0	0	0	0	0	0
0	0	0	0	0	0	0	0	0	0	0	0	0	0	0	0	0
0	0	0	0	0	0	0	0	0	0	0	0	0	0	0	0	0
0	0	0	0	0	0	0	0	0	0	0	0	0	0	0	0	0
0	0	0	0	0	0	0	0	0	0	0	0	0	0	0	0	0
0	0	0	0	0	0	0.1	0	0	0	0	0	0	0	0	0	0
0	0	0	0	0.1	0	0.1	0	0.1	0	0	0	0	0	0	0	0
0	0	0	0	0	0	0.1	0	0	0	0	0	0	0	0	0	0
0	0	0	0	0	0	0	0	0	0	0	0	0	0	0	0	0
0	0	0	0	0	0	0	0	0	0	0	0	0	0	0	0	0
0	0	0	0	0	0	0	0	0	0	0	0	0	0	0	0	0
0	0	0	0	0	0	0	0	0	0	0	0	0	0	0	0	0
0	0	0	0	0	0	0	0	0	0.1	0.1	0	0	0.1	0	0.1	0
0	0	0	0.1	0	0	0	0	0	0.1	0.1	0	0	0	0	0.1	0
0	0	0	0.1	0	0	0	0	0	2.4	2	0	0	0	0	0.1	0
0	0	0	0	0	0	0	0	0.1	0	0	0	0	0	0	0	0
0	0	0	0	0	0	0	0	0	0	0	0	0	0	0	0	0
0	0	0	0	0	0	0	0	0	0	0	0	0	0	0	0	0
0	0	0	0	0	0	0	0	0	0	0	0	0	0	0	0	0
0	0	0	0	0	0	0	0	0	0	0	0	0	0	0	0	0
0	0	0	0	0	0	0	0	0	0	0	0	0	0	0	0	0
0	0	0	0	0	0	0	0	0	0	0	0	0	0	0	0	0
0	0	0	0	0	0	0	0	0	0	0	0	0	0	0	0	0
0	0	0	0	0	0	0	0	0	0	0	0	0	0	0	0	0
0	0	0	0	0	0	0	0	0	0	0	0	0	0	0	0	0
0	0	0	0	0	0	0	0	0	0	0	0	0.1	0	0	0	0
0	0	0	0	0.1	0	0	0	0	0	0	0	0.1	0	0	0	0
0	0	0	0.1	0	0.1	0	0	0	0.3	0.3	0	0	0	0	0	0
0	0.1	0	0.1	0	0	0	0	0	1.35	1	0	0	0	0	0	0
0	0.1	0.1	0.1	0	0	0	0	0.1	0	0	0	0	0	0	0	0
0	0	0	0	0	0	0	0	0	0	0	0.1	0	0	0.1	0	0
0	0	0	0	0	0	0	0	0	0	0	0	0	0	0	0	0
0	0	0	0	0	0	0	0	0	0	0	0	0	0	0	0	0
0	0	0	0	0	0	0	0	0	0	0	0	0	0	0	0	0.1
0	0	0	0	0	0	0	0	0	0.1	0.1	0	0	0	0	0.1	0.1
0	0	0	0	0	0	0	0	0	0	0	0.1	0	0	0	0	0.1
0	0	0	0	0	0	0	0.1	0	0	0	0.1	0	0	0	0	0
0.1	0	0	0	0	0	0	0	0	0	0	0.1	0	0	0	0	0
0.1	0	0	0	0	0	0	0	0	0	0	0	0	0	0	0	0
0	0	0	0	0	0	0	0	0	0	0	0	0	0	0	0.1	0
0	0.1	0	0.1	0	0	0	0	0	0	0	0	0.1	0	0	0.1	0
0.1	0.1	0	0	0.1	0.1	0	0	0	0	0	0	0.1	0.1	0	0.1	0
0.1	0	0	0	0	0.1	0	0	0	0	0	0.1	0.1	0.1	0	0.1	0.4
0.1	0	0.1	0	0	0	0	0	0	0	0	0.1	0.1	0.1	0.1	0.1	0.1
0	0	0	0	0	0.1	0	0	0	0	0	0.1	0	0.1	0.1	0.1	0.5
0	0	0	0	0	0	0	0	0	0	0	0.1	0	0	0.1	0.1	0.5
0	0.1	0	0.1	0.1	0.1	0	0	0	0	0	1.4	0	0.1	0	0.1	0.35
0.1	0.1	0	0	0.1	0.1	0	0.1	0	0	0	0.2	0	0.1	0.1	0.1	0.1
0.1	0.1	0.1	0.1	0	0.2	0	2.2	0	0.1	0.1	0.1	0.1	0.1	0	0.1	2.5
0	0.1	0	0.1	0.1	0.2	0	3.4	0.1	0.1	0.1	0.1	0.1	0.1	0.1	0.1	0.1
0	0	0	0	0.1	0.1	0	0.9	0.1	0	0	0.1	0.1	0.1	0.1	0.1	0.1
0.1	0	0.1	0	0.1	0.1	0	4.7	0.1	0	0	0.1	0.1	0.1	0	0.1	0.5
0.1	0.1	0	0	0.1	0	0	5.9	0	0.1	0.1	0.1	0	0.1	0	0.1	0.1
0.4	0.1	0	0.12	0.1	0.1	0.1	1.7	0.1	0.1	0.1	0.1	0.1	0.1	0	0.1	0
0.1	0.4	0.1	1.9	1.8	0.1	0.1	0.1	2	7.7	7.59	1.1	0.1	0.1	0	0.1	0
0.1	0.1	6.5	0.7	0.1	0.6	0.1	2.6	1	11.3	12.1	5.3	0	0	0.1	0.1	2
0.1	0.1	0	0	0.1	0.1	0.6	9.4	0.1	0	0	0	0.1	0.3	0	0.1	0
0.9	0.4	1.4	16.46	2.33	16.87	13.39	0	8	7.6	7.36	0	4.9	10.88	0	0.1	0.1
0.1	0.4	33.95	3.9	2.7	4	0.2	2.2	9.7	3.59	3.2	0.2	0.1	1.07	16.59	0.1	3
0.1	0.1	22.6	36.09	0.1	0.5	0	16.02	4.7	85.42	78.3	34.96	0	0.1	15.29	0.1	8.8
0.1	0.6	14.63	5.8	0.1	0.1	0	21.03	5.12	47.15	53.16	30.43	0.1	0	33.94	0	11.2
0	0	0	1	0	0.1	0	12.3	0.1	0.2	0.2	24.9	0.1	0	2.3	0	0.5
0	0	0	0	0	0	0	9.69	0	0	0	9.1	0.1	0	0.1	0	0.1
0	0	0	0	0	0	0	0.1	0	0	0	2.2	0	0	0	0.1	0
0	0	0	0	0	0	0	0	0	0	0	0.1	0	0	0	0.1	0
0.1	0	0	0	0	0	0.1	0	0	0	0	0	0.3	0.1	0	0.1	0
0.2	0.1	0	0	4.8	0.1	0.1	0	0	0	0	0	0.1	3.97	0	0.1	0
0.1	1.7	12.02	0.1	1.41	6.6	0	0	2.3	0.1	0.1	0.1	1.9	8.86	0	0.1	0.5
0	0.6	20.19	0.6	0.1	0.8	0	10.49	7.1	0.1	0.1	7.8	0.1	1.1	0.6	0	2.1
0.1	0.4	3.1	0.4	0.1	6	0	10.84	12	4.6	4.2	8.38	0	0	0.1	0	3.4
0	0.1	6.5	0.1	0	0.1	0	14.2	3.7	5.71	5.6	5.2	0	0.1	22.35	0	7.58
0	0	0	0.1	0	0.1	0	16.73	0	0.1	0.1	5.16	0	0	20.11	0	13.9
0	0.1	0	1	0	0	0	5	0	4.4	4.1	0.5	0	0	0.1	0	0.1
0	0.1	0	0.1	0.1	0	0	1.8	0.1	0.1	0.1	1.9	0	0	0	0.1	0
0.1	0	0	0.1	0	0	0	0.1	0	0.1	0.1	0.1	0	0.1	0	0.1	0
0.1	0.1	0	0.4	0.1	0	0.1	0	0	1.31	1	0	0	0.1	0	0.1	0
0.1	0.1	0.1	0.5	0.1	0.1	0	0	1.02	0.1	0.1	0	0	0.1	0	0.1	0.1
0.1	0.1	0.1	0.1	0	0.1	0	3.8	0.1	0.1	0.1	0.1	0	0.1	0	0	1
0.1	0	0	0	0	0	0	0.2	0	0	0	0	0	0	0	0.1	0
0.1	0	0	0	0	0	0	0	0	0	0	0	0	0	0	0.1	0
0.8	0	0	0	0	0	0	0	0	0	0	0	0	0	0	0.1	0
0.35	0	0	0	0	0	0	0	0	0	0	0	0.1	0	0	0.1	0
0.2	0.1	0	0.6	0.1	0.1	0	0	0	0.2	0.1	0	0.1	0.1	0	0.1	0
0	0.1	0	3.5	0.3	0.1	0	0	0.1	6.2	6	0	0	0.8	0	0.1	0
0.1	0.1	0.1	0.1	0	0.1	0	0.1	0.1	0.1	0.1	0.1	0	0.1	0.1	0.1	0.2
0.1	0.8	0	0.1	0.1	0.1	0	2.2	0.1	0.1	0.1	0	0	0.1	0	0.1	1.3
0.1	0.1	0	0.1	0.1	0.1	0	2.2	0.1	1.4	1	0	0.1	0.1	0	0.1	0.1
0.1	0	0	0.1	0.1	0.1	0	0.33	0.1	6.71	6.4	0	0	0.1	0	0	0.1
0	0	0	0.1	0	0	0	0.1	0	0.1	0.1	0	0	0.1	0	0.1	0.1
0.7	0	0	0	0	0	0	2.7	0	0	0	0.1	0	0	0	0.1	0.7
0.7	0	0	0	0	0	0	5.77	0	0	0	0	0	0	0	0	0.5
0.1	0	0	0	0	0	0	0.1	0	0	0	0.1	0	0	0	0	0
0	0	0	0	0	0	0	0.1	0	0	0	0.1	0	0	0	0	0
0	0	0	0	0	0	0	0.6	0	0	0	0.1	0	0	0	0	0.1
0	0	0	0	0	0	0	0.1	0	0	0	0.1	0	0	0	0	0.1
0.1	0	0	0	0	0	0	0.1	0	0	0	0.1	0	0	0.1	0	0.1
0.1	0.1	0	0	0	0.1	0	0	0	0	0	0.9	0	0.1	0	0	0
0.1	0.1	0	0.1	0	0.1	0	0	0	0	0	3.91	0	0.1	0	0	0.1
0.1	0.1	0	0.1	0.1	0.1	0	1.9	0	0	0	0.1	0	0	0	0	0.1
0.1	0.1	0.1	0.3	0.1	0.1	0	0	0.1	0.1	0.1	0	0	0.1	0.1	0	0
0.1	0.1	33.07	1.3	0	1	0	0	3.2	0.1	0.1	0.1	0.1	0.1	0.1	0	0
0.3	0.1	0	0	0.1	0.1	0	7.9	0	0.1	0.1	0.1	0.1	0.1	0.1	0.1	0.1
1.22	0.1	0	2	0.1	0.1	0	0.1	0	0.2	0.2	0.1	0	1.4	0.1	0.1	0
0.1	0.1	0	0.6	0	0	0	0.1	0	3	2.45	0.1	0	0.1	0.3	0	0
0.1	0.1	0	0.1	0	0.1	0	0.2	0.1	0	0	0.1	0	0	0	0	0
0	0	2.6	0	0.1	0.1	0	0.1	0.1	0	0	0.1	0	0	0	0	0.1
0	0.1	0	0	0.1	0	0	8.1	0	0	0	9.8	0	0	0.1	0	0.5
0.1	0.1	0	0	0.1	0	0	0.1	0	0	0	3.7	0	0.1	0	0	0
0.1	0.1	0	0.1	0.1	0	0	0	0	0	0	0.1	0	0.1	0	0.1	0
0.1	0	0	0	0	0	0	0	0	0	0	2.67	0	0.1	0	0.1	0
0.1	0	0	0	0	0	0	0.1	0	0	0	5.4	0	0	0	0.1	0
0.1	0	0	0	0	0	0	0.4	0	0	0	18.79	0	0	0.1	0	0.1
0.1	0	0	0	0	0	0	3.6	0	0	0	7.3	0	0.1	0.1	0	0.1
0.1	0	0	0	0	0	0	8.08	0	0	0	4.54	0	0.6	0.1	0	0.7
0.1	0	0	0	0.1	0.1	0	0.1	0	0	0	7.41	0	1.9	0.1	0.1	0.1
0.1	0	0	0	0	0	0.1	0.1	0	0.1	0.1	14.7	0	4.4	0	0.1	0
0.1	0.1	0	0.1	0	0.1	0.1	0.1	0	0	0	2.9	0	4.8	0	0.1	0
0.1	0.1	0	0.1	0	0.1	0.1	0	0.1	0	0	0.3	0	2.2	0	0.1	0.1
0.1	0.1	0	0.1	0	0.1	0.1	0	0.1	0	0	0.2	0	0.1	0	0.1	0
0	0.1	0.1	3.9	0	0.79	0.1	0	0.1	0	0	0.1	0	0.1	0	0.1	0
0	0.1	0.6	0.1	0.1	2.1	0.1	0.1	0.1	0	0	0.1	0	0.1	0	0	1.8
0	0.1	0	0	0.2	1.4	0.1	0.1	0	0	0	1.3	0	0.1	0	0	0.49
0.1	0.1	0	0	0.1	0.1	0	0.1	0	0	0	9.2	0.1	0.7	0	0	0
0.1	0.1	0	0	0	0	0.1	0.1	0	0.1	0.1	8.86	0	0.1	0	0.1	0
0.3	0	0	0	0	0	0.1	0.1	0	0	0	7.6	0	0.1	0.1	0	0
3.1	0	0	0	0	0	0.1	0.1	0	0	0	0.1	0	0	0	0.1	0
0.1	0.1	0	0	0	0	0.1	0.1	0	0	0	0.1	0	0	0	0.1	0
0.1	0	0	0	0	0.1	0	55.92	0	0	0	0.1	0	0.1	2.3	0.1	24.2
0.2	0	0	0	0	0	0	79.32	0	0	0	61.48	0	0	67.79	0.1	18.78
0.1	0	0	0	0	0	0.1	2.5	0	0	0	32.94	0	0.1	49.53	0.1	0.1
0.1	0	0	0	0	0	0	20.89	0	0	0	1.2	0	0.1	13.11	0.1	5.8
7.42	0	0	0	0	0	0	25.48	0	0	0	11.83	0	0.1	0.1	0.1	8.8
0.2	0	0	0	0.1	0	0	9.9	0	0	0	9.37	0	0.1	1.2	0.1	0.4
0.4	0	0	0	0	0	0.1	6.4	0	0	0	4.9	0	0.1	0.1	0.1	0
0.1	0	0	0	0	0	0.1	14.58	0	0	0	0.8	0	0.1	1.3	0	0.1
0.1	0	0	0	0	0	0.1	24.73	0	0	0	0.2	0	0.6	5	0.1	0.1
0.1	0	0	0	0	0	0.1	0.4	0	0.1	0.1	0.5	0	1.4	0.1	0.1	0.1
0.1	0	0	0.7	0	0	0.1	0	0	0.1	0.1	0.1	0.1	0.1	0	0.1	0
0.1	0.1	0	0.1	0	0.1	0.1	0	0	0	0	0.1	0.1	0	0	0.1	0
0.1	0.1	0	0	0	0.1	0.1	0	0	0	0	0.1	0	0.1	0	0.1	0.1
0.1	0	0	0	0	0.1	0.1	0	0	0	0	0.1	0	0.1	0	0.1	0.1
0.1	0	0	0	0	0.1	0.1	0.1	0	0	0	2.6	0.1	0.7	0.1	0.1	0
0.3	0	0	0	0	0	0.1	3.9	0	0.1	0.1	21.9	0.1	0.1	4.57	0.1	0
0.9	0	0.7	0	0	0.1	0.1	22.92	0.1	0	0	0.1	0.1	0.1	0.6	0.1	5.9
0.3	0	0.4	0	0.1	0.1	0.1	75.33	0.1	0	0	2.4	0.1	0.9	2.7	0.1	18.55
2.4	0	0.7	0	0	0.1	2.4	58.88	0.1	0	0	1.8	0.1	0.8	18.99	0.1	110.31
3.13	0	49.81	0	0	0.3	0.5	14.5	0.1	0	0	1.8	0.1	3.3	50.72	0.1	98.23
0.9	0.1	25.08	0.4	0	10.6	0.1	19.75	2.1	2.8	2.3	19.81	0.1	0.1	29.49	0.1	40.33
0.5	0.1	48.2	0.1	0.1	0.1	0	10.12	0	10.96	11.59	20.18	0.1	0.1	56.87	0.1	9.9
0.1	0.1	0.1	0.1	4	0.7	0.1	12.44	0	0.1	0.1	31.33	0.3	0.1	14.58	0.1	3.44
0.1	0.1	0.1	0	0.1	1.7	0.1	16.01	0	0	0	2	0.1	3.06	13.75	0.1	3.5
0.8	0	0.1	0	0	1	0.1	14.39	0	0	0	36.06	0.1	0.6	0.2	0.5	0.2
2.04	0	0	0	0	0.1	0.1	0	0	0	0	51.02	0.1	21.85	1	11.8	1.1
3.9	0	0	0	0	0.1	0.1	3.2	0	0	0	74.2	10.7	25.54	0.1	7.45	0.1
0.4	0	0	0	0.1	0.2	0.1	2.44	0	0	0	83.17	1.2	0.3	0.1	1.8	0.1
0.1	0	0	0	0.1	1	0.1	1.5	0	0.1	0.1	52.97	0.1	0.1	2.47	0.1	0.1
0.1	0	0	0	0	0.1	0.1	11.45	0	0	0	82.7	0.1	0.1	1.2	1.3	7.4
1.9	0	8.78	0	0	0.1	0.1	7.8	0	0.1	0.1	128.71	0.1	1.1	8	0.1	0.3
0.5	0	1	0	0	5.7	0.1	4.15	6.5	0.1	0.1	4.3	0.1	1.4	23.88	0.1	38.2
4.4	0.1	0.1	0.8	12.6	41.13	0.1	0.2	1.6	4.42	4.1	0.1	1.8	5.4	0.1	3.2	3
7.6	0.1	0	0	196.81	11.69	8.25	0.5	0.1	0.1	0.1	0.1	3.5	0.8	0.1	5.4	1.1
5.24	9.9	1.8	0.1	29.7	0.1	63.2	10.4	1.2	0.2	0.1	3.8	3.3	0.1	0.6	2.9	0.6
0.1	0.1	2	0.1	0.4	0.1	89.6	9.7	0.1	0.1	0.1	13.4	2.2	0.1	14.8	0.3	2.4
0.1	0.1	0.6	0.1	0.1	0.4	35.67	15.77	0.1	10.3	11.08	35.52	0.4	0.1	15.7	0.1	4.4
0.1	0.1	1.8	3.7	0.1	0.1	16.11	13.33	0.1	25.63	27.73	46.89	0.3	0.1	1.4	2.6	3.9
0.1	0.1	31.21	0.1	1.18	0.1	7.1	7.83	3.5	0.1	0.1	44.09	0.8	0.1	39.66	3.7	4.1
1.75	0	141.87	0	1.3	0.1	0.8	66.36	7.7	0.1	0.1	3.3	2.5	0.1	19.16	2.6	14.81
0.9	0.1	33.97	0.1	2.69	3	1.3	69.11	40.41	0.1	0.1	3	1.6	0.1	5	0.1	29.69
2.5	0.1	4.3	0	0.5	91.75	1.5	44.45	19.75	0.1	0.1	30.15	1	0.1	23.91	1	18.6
7.48	2.77	37.22	0.3	1.5	81.75	0.1	16.37	30.79	2.5	2	12.8	1.86	0.1	21.69	3.9	19.68
9.68	12.89	0.7	5.21	5.1	45.66	0.2	30.5	39.56	25.82	28.24	0.1	0.7	1.2	2.8	2	14.94
2.9	74.66	5.4	0	28.71	4	3.72	27.88	0.1	0.2	0.1	0.1	1.7	1.1	0.1	2.1	20.17
13	54.97	7.5	0.1	14.9	0.1	9.1	41.8	4.6	6.5	6.1	0.1	17.08	0.1	11	3.8	37.23
21.37	46.95	48.01	0.1	5.4	20.04	4.2	27.97	10.8	0.3	0.2	15.17	2.7	1	3.4	9.1	14.47
12.95	46.52	28.46	10.42	10.92	11.01	0.7	11	3.9	19.35	21.71	7.38	5.2	0.1	9.57	6.1	7.85
3.33	30.21	21.77	68.31	0.1	6.6	1.1	15.14	0.9	31.71	36.8	11.25	3.8	0.1	4.4	3.4	11.8
0.7	6	19.87	24.47	0.1	7.16	0.9	24.24	4.2	1.4	1	26.28	0.3	0.1	20.67	0.2	8.7
0.1	0.1	16.56	0	0.1	3.69	0.9	8	0.6	0.1	0.1	58.71	0.1	0.1	49.8	0.2	2.1
1.5	0.1	108.12	0.1	0.1	3	0.7	1.5	5.6	0.1	0.1	75.75	0.1	0.1	91.84	0.1	3.44
6.4	0.1	24.79	0.1	0.1	0.1	0.8	2.47	0.1	0.1	0.1	36.29	0.1	0.1	50.46	0.1	4.7
11.9	0.1	46.54	0.1	0.2	0.1	1.4	1.5	0.1	0.1	0.1	5.43	0.5	0.1	28.69	0.1	0.8
15.01	5.6	7.7	52.03	0.1	0.9	0.8	0.1	5.3	30.8	36.09	0.1	0.4	1.4	0.1	9.73	0.1
7.6	0.6	0	21.41	0.5	0.2	0.9	0.1	0.1	8.95	9.1	0.1	0.1	19.14	0.1	39.85	0.1
16.3	0.1	0	5.86	0.5	1.1	0.1	0.1	0.1	6.43	6.03	0.1	5.7	20.52	0.1	4.6	0.1
27.48	1.4	1.3	0.1	4	0.1	0.1	0.1	0.1	0.6	0.5	11.14	0.1	0.7	0.4	1.3	0.1
5.4	15.3	1.4	32.2	49.84	5.3	0.14	3.7	0.1	10.48	11.28	0.1	25.11	12.7	0.1	0.1	0.1
13.91	5	0.1	0.1	13.8	0.9	7.3	0.1	0	0.1	0.1	3.7	15.8	12.29	0	12.59	0.1
17.01	2.5	2.79	0.1	7.3	0.2	2.2	1.65	0	0.1	0.1	2	10.6	27.87	0.8	7	2
9.82	0.1	0	0	9.9	23.58	3	4.3	0.1	18.43	20.74	5.1	22.41	96.88	1	40	2.6
1.6	0.1	0.1	0	135.15	16.66	26.41	5.3	0.1	0.1	0.1	0.1	49.33	25.34	0.1	38.97	2.7
0.1	0.1	0.8	0	49.6	12.54	87.81	14	0.1	0	0	0.1	80.78	0.1	1.1	9.2	17.2
0.1	0.6	3.9	0	8	0.1	68.21	25.45	0.1	0.1	0.1	0.5	7.36	0.1	1	5.7	3.7
0.6	3.8	10.9	0.1	0.1	1.7	16.11	37.41	1.8	0.1	0.1	4.8	4.5	0.1	1.7	0.1	5.6
0.3	0.1	46.65	19.27	3.3	4.7	1	53.93	4.3	3.44	3	0.1	0.1	0.1	7.31	0.3	32.76
0.1	1.8	32.5	0.1	17.21	23.24	0.1	30.4	7.97	0.1	0.1	12.87	1.9	0.1	9.43	0.1	25.48
0.1	0.1	103.82	0	25.37	8.9	7.04	38.7	3	0.1	0.1	31.02	9.92	0.1	7.55	0.1	11.72
0.1	0	44.44	0.1	12.8	8.5	0.3	31.04	5.58	0	0	31.52	9.68	0.5	20.99	0.1	12.09
0.4	0	104.15	0	1.1	26.37	0.1	25.92	11.6	0	0	14.82	13.71	0.5	23.63	10.43	2.1
0.8	0.1	6.9	0.1	0.8	7.84	0.1	19.53	8.5	0.1	0.1	15.95	0.1	1.4	13.5	0.1	0.4
0.8	0.1	34.67	0.1	0.3	9.5	0.4	6.51	18.32	0.1	0.1	50.22	0.1	0.1	36.64	0.1	6.1
3.6	0.9	15.52	0.1	4.5	9.93	0.8	24.1	28.42	0.1	0.1	14.52	0.2	0.1	16.11	0.1	28.39
3.7	0.7	8.3	0.1	32.69	7.93	0.4	26.98	11.49	0.8	0.6	0.5	9.48	1.1	0.3	0.1	25.11
12.2	6.22	18.6	0.1	9.9	1.4	5.76	17.1	6.1	0.6	0.4	2.2	1.83	0.1	7	0.1	6
2.4	16.83	0.6	9.3	11.92	0.89	10.7	4.5	3.8	11.57	12.3	0.2	4.6	0.1	0.1	0.4	14.7
1.3	4.32	0.1	0.1	3.5	6.26	20.66	0.86	1	0	0	0.3	8.38	0.4	0.1	0.4	2.4
1.2	0.1	0.1	0.1	0.1	2.3	6.6	2.1	4.7	0.1	0.1	0.1	6.01	0.3	0.1	1.1	8.6
0.6	2.59	0.1	0.2	0.9	10.1	0.1	0.1	11.2	0.1	0.1	4.8	0.1	1	0	0.1	2.1
2.2	0.1	0.1	0.1	0.1	0.6	0.1	3.95	0.3	0.1	0.1	4.27	0.1	7.9	6.5	0.1	2.2
3.2	0.1	49.27	0	0.1	22.07	0.1	0.2	40.62	0	0	5.2	0.1	13.2	22.51	0.1	13.72
13.66	11.12	9	0	0.1	10.39	0.1	0.1	54.22	18.01	20.35	6.74	0.1	14.71	1.2	1.48	0.1
5	27.2	0.1	18.65	2	0.1	0.1	0.1	0.6	30.96	36.2	8.4	2.7	26.58	1.1	8.24	0.1
2.4	5.87	0.1	11.49	0.1	0.9	0.2	0.1	0.1	0	0	2.9	2.2	29.37	4.94	12.21	0.3
2.7	0.1	5.7	0.1	0.1	17.53	0.1	0.1	0.6	8.38	8.18	0.5	12.14	16.12	8.9	38.79	9.69
6.9	18	16.1	0.2	27.06	10.89	0.1	0.1	4.48	0.1	0.1	0.1	20.83	24.87	0.4	35.82	5.6
0.8	2.5	0.1	10.03	25.39	0.9	0.1	0.4	0.6	1	0.7	2	49.25	35.8	0.1	16	0.1
0.1	0.1	1.03	0.12	8.72	0.1	18.67	2.5	0.1	0.2	0.2	0.1	8.7	16.52	2.1	0.9	1.5
0.1	0.3	13.8	0.2	0.4	0.1	24.91	0.4	6.51	8.6	8.75	0.1	3.3	5.9	0.1	0.1	2.3
0.5	0.2	0.1	0.4	0.6	1	7.4	1.7	3.52	12.94	14.41	2.8	0.1	0.4	0	0.1	3.8
0.1	1	0	5.4	1.1	2.8	0.1	0.1	0.1	12.89	14.33	0.6	0.1	0.4	1	0.1	2.7
0.1	1.63	0.1	1.1	4.2	9.2	0.1	0.9	0.2	2.3	1.7	2.2	0.1	47.81	2.7	0.1	2.4
0.1	6.34	0	1	17.37	4.41	0.1	0.45	3.8	11.71	12.65	12.34	35.47	44.8	9	0.1	0.3
0.1	0.1	12.3	15.22	16.48	0.3	0.14	2	11.95	26.1	29.08	0.1	23.22	12.56	6	0.1	3.1
1.7	1.5	22.39	1.7	9.5	0.1	0.1	0.6	2.6	3.5	3.1	0.1	0.1	0.1	4.4	0.1	5.6
10.1	2.92	0.1	0.1	0.1	0.1	0.1	0.2	4.7	2.1	1.6	6.6	0.1	0.1	1.8	0.5	0.1
78.4	1.9	3.1	0.31	0.1	2.57	0.1	0.1	6.4	3.4	3	3.3	3.6	30.4	0.6	46.31	0.1
57.02	4.32	0.1	0.1	0.1	0.1	0.1	0	5.4	0.1	0.1	3.1	17.1	0.1	0.1	13.45	0.1
4.1	0.6	0.3	0.1	0.36	0.1	0	0	1.4	0.83	0.6	11.8	6.9	0.1	3.5	4	0.1
11.75	0.5	0.3	2.6	3.2	2.3	0.1	0.1	0.1	2.5	2	5.4	1.3	0.1	7.5	0.1	0.1
2.8	0.1	2	0	0.6	19.61	0.1	0.8	2.9	0	0	3	5.32	6.19	1.5	0.1	0.1
7.16	0.1	0.1	0	18.76	0.1	0.1	0.1	13.83	0	0	0.1	20.6	45.85	3.1	0.1	0.1
8.8	2.6	0.1	0	29.96	0.6	0.1	0.1	8.2	0	0	0.1	45.81	9.56	0.1	27.51	0.1
4.4	4.1	0.1	0.1	3.09	0.1	0	0.6	4.4	0.1	0.1	0.2	6	11.39	0.3	12	2.1
0.9	5.7	0	0	6.79	5.8	0	0.2	0	0.1	0.1	0.1	4.5	22.87	0.5	4.6	1.2
1.5	0.1	0.1	0	19.85	1.8	0	0.2	0.1	0	0	0.1	23.85	26.58	0.1	9.99	0.2
0.9	0	0.1	0	7.46	14.56	0	0.1	0	0	0	0.1	47.34	19.96	0.1	0.1	0.4
0.3	0.1	2	0	9.6	37.67	0.1	0.1	0.7	0	0	0.1	0.5	9	0	0.1	0.1
1.3	0.1	2.8	0	26.5	32.19	0.1	14.41	9.3	0.1	0.1	5	0.1	0.1	0.1	4.6	0.1
1.6	0.1	3.2	0	18.25	51.43	0.1	29.41	10.76	0.6	0.5	4.9	0.1	0.1	5.33	0.1	14.36
0.8	1.5	2.6	0.1	7.32	48.2	0.1	34.01	0.9	0.1	0.1	15.04	0.1	0.1	0.1	0.78	22.82
0.5	0.1	6.97	0.1	0	1.4	0.1	16.4	0.1	0.1	0.1	5.2	0.1	0.1	15.59	0.1	52.55
0.1	0	0.1	0	0	12.93	0.1	8.4	0.1	0	0	1	0.1	0.1	0.52	0.1	45.1
0.1	0.1	1.9	0	1.8	12.5	0.1	2.6	0.1	0	0	0.5	0.1	0.1	0.1	0.1	11.88
0.1	0	43.89	0	1.8	65.51	0.1	0.4	14.77	0	0	0.3	0.1	0.1	0.1	0.1	1.6
0.1	0	67.05	0	5.6	16.8	0.1	0.2	65.74	0	0	0.1	0.1	0.1	3.4	0.1	0.1
0.1	0	25.47	0	0.1	22.13	0	0	12.7	0	0	0.1	0.1	0.1	0.7	0.1	0.1
0.1	0.1	0.1	0.1	0.1	13.8	0	0.1	11.29	0.1	0.1	1.1	0.1	5.87	0	0.1	0.1
0.1	0.1	0.1	0	0.4	11	0	0.1	8.2	0.1	0.1	1.6	0.1	15.5	0	0.1	0.1
0.1	0.1	0	0	6	1.2	0	0.1	0.1	0	0	0.1	0.4	3.26	3.2	0.1	0.1
0.1	0.1	0	0	5.7	0.1	0	0.1	0.1	0	0	0	0.1	0.7	0.1	0.1	0.1
0.1	0.1	0.1	0	4.2	0.1	0	0.1	0.1	0	0	0	0.8	6.8	0	0.1	0.1
0.1	0.1	0	0	0.1	0.2	0	1.9	0.1	0	0	0.1	12	1.94	0.1	3.4	0.4
0.1	0	0	0.1	0.1	0.1	0	17.15	0.1	0.1	0.1	0.1	1.6	0.1	0.1	0.1	3.8
0.1	0	0	0.1	0.1	0.1	0	43.5	0.1	0.2	0.2	0.1	0.2	0.1	0	0.1	3.1
0.1	0	0	0.1	0.1	0.1	0	19.1	0	0	0	7.96	0.1	0.1	0.1	0.1	0.1
0.1	0.1	0	0	0.1	0.1	0	8.7	0	0	0	7.23	2.7	17.4	0.1	0.1	0.1
0.1	0.1	0	0.1	2.6	0.1	0	0.1	0	0.1	0.1	5.1	4.36	50.74	1.7	3.3	0.1
1.8	0	0	0	0.1	0.1	0	1.2	0	0	0	5.7	0.2	0.1	1.7	7.2	0.1
0.35	0	0	0	0	0	0	0.86	0	0	0	0	0.1	0	1.2	0.1	0.1
0.4	0	0	0	0	0	0	0.1	0	0	0	0.1	0	0	0	0.1	0
0.7	0	0	0	0	0	0	0.1	0	0	0	0.1	0	0.1	0.1	0.1	0.1
2.1	0	0	0	0	0	0	0.1	0	0	0	0.1	0	0	0.1	0.1	0.1
0.2	0	0	0	0	0	0	0.1	0	0	0	0.1	0	0	0.3	0	0
0.1	0	0	0	0	0	0	0.1	0	0	0	0.1	0	0	0.1	0	0.1
2	0	0	0	0	0	0	1.5	0	0	0	0.1	0	0.1	0.1	0	1.6
4.3	0	1.4	0	0	0.1	0	7.83	0	0	0	1.5	0	0	6.71	0	12.64
0.1	0	33.3	0	0	4.47	0	4.9	0.1	0	0	0.1	0	0	19.57	0	16.86
0.1	0	37.41	0	0	4	0	12.4	0.1	0	0	7.97	0	0	51.52	0	32.74
0.1	0	13.8	0	0	0	0	3.4	0	0	0	67.63	0	0	86.34	0	6.78
0	0	0	0	0	0	0	4.4	0	0	0	19.13	0	0	0	0.1	0
0	0	0	0	0	0	0	0.1	0	0	0	0	0	0	0	0.1	0
0.1	0	0	0	0	0	0	0	0	0	0	0	0	0	0	0	0
0.1	0	0	0	0	0	0	0	0	0	0	0	0	0	0	0	0
0.1	0	0	0	0	0	0	0	0	0	0	0	0	0	0	0	0
0.1	0.1	0	0	0	0	0	0	0	0.1	0.1	0	0	0	0	0.1	0
0.1	0	0	0	0	0	0	0	0	0	0	0	0	0	0	0	0
0	0	0	0	0	0	0	0	0	0	0	0	0	0	0	0	0
0	0	0	0	0	0	0	0	0	0	0	0	0	0	0	0	0
0	0	0	0	0	0	0	0	0	0	0	0	0	0	0	0	0
0.1	0	0	0	0	0	0	0	0	0	0	0	0	0.1	0	0.1	0
0.1	0	0	0	0	0	0	0	0	0	0	0	0.1	0.1	0	0.1	0
0	0	0	0	0	0	0	0	0	0	0	0	0.1	0.1	0	0.1	0
0	0	0	0	0.1	0.1	0.1	0	0	0	0	0	0.1	0.1	0	0.1	0
0.1	0	0	0	0	0.1	0.1	0	0	0	0	0	0.1	0	0	0.1	0.1
0.1	0.1	0	0.1	0	0.1	0	0	0.2	0	0	0	0.1	0	0.1	0.1	0.2
0.1	0	0	0	0	0	0	0.1	0	0	0	0	0	0	0	0.1	1.1
0	0	0	0	0	0	0	0	0	0	0	0	0	0	0	0	0.1
0	0	0	0	0	0	0	0	0	0	0	0	0	0	0	0	0
0	0	0	0	0	0	0	0	0	0	0	0	0	0	0	0	0
0	0	0	0	0	0	0	0	0	0	0	0	0	0	0	0	0
0	0	0	0	0	0	0	0	0	0	0	0	0	0	0	0.1	0
0	0	0	0	0	0	0	0	0	0.1	0.1	0	0	0	0	0.1	0
0	0	0	0	0	0	0	0	0	0	0	0	0	0	0	0.1	0
0	0	0	0	0	0	0	0	0	0	0	0	0	0	0	0	0
0	0	0	0	0	0	0	0	0	0	0	0	0	0.1	0	0	0
0	0	0.1	0	0	0.1	0	0	0	0	0	0	0	0.1	0.1	0.1	0.1
0	0	0	0	0	0	0	0	0	0	0	0	0	0.1	0.1	0	0
0.1	0	0	0	0	0	0	0	0	0	0	0	0	0	0	0	0
0.1	0	0	0	0	0.1	0	0	0	0	0	0	0	0	0	0	0
0.1	0	0	0	0	0.1	0	0	0	0	0	0	0	0	0	0.1	0
0	0	0	0	0	0	0	0	0	0	0	0.1	0	0	0	0.1	0
0.1	0	0	0	0	0	0	0	0	0	0	0.1	0.1	0.1	0	0	0
0.1	0	0	0	0	0	0	0.1	0	0	0	0	0	0	0	0.1	0.1
0	0	0.1	0	0	0	0	0	0	0	0	0.1	0.1	0	1	0.1	0.1
0	0	2.2	0	0	0.1	0	0.1	0	0	0	0.1	0	0	0.2	0.1	0.1
0	0	2	0	0	0.1	0	0.1	0	0	0	0.1	0	0	0.1	0.1	0.1
0	0	4.9	0	0	0.1	0	0.1	0.1	0	0	0.1	0.1	0	2.29	0.1	0.1
0.1	0	0	0	0	0	0	5	0	0	0	0.1	0.1	0	0.1	0.1	0.1
0	0	0	0	0	0	0	0.1	0	0	0	0	0	0	0	0	0.1
0	0	0	0	0	0	0	0	0	0	0	0	0	0	0	0	0
0	0	0	0	0	0	0	0	0	0	0	0	0	0	0	0	0
0	0	0	0	0	0	0	0	0	0	0	0.1	0	0	0.1	0	0.1
0	0	0	0	0	0	0	0.1	0	0	0	0	0	0	0	0	0.1
0.1	0	0	0	0	0	0	1.2	0	0	0	0	0	0	0	0	0
0.1	0	0	0	0	0	0	0	0	0	0	0	0	0	0	0	0
0.1	0	0	0	0	0	0	0	0	0	0	0	0	0	0	0	0.1
0.4	0	0	0	0	0.1	0	0	0	0	0	0	0.1	0.1	0	0.1	0
0.1	0	0.1	0	0	0.5	0	0.1	0.1	0	0	0	0.1	0.4	0.1	0.1	0.1
0.1	0	0.1	0	0	0.1	0	0.1	0	0	0	0.1	0.1	0.1	0	0.1	0
0.1	0	0	0	0	0	0	0	0	0	0	0	0.1	0.1	0	0.1	0
0.1	0	0	0	0	0	0	0	0	0	0	0	0.1	0.1	0	0.1	0
0	0	0	0	0	0	0	0	0	0	0	0	0	0	0	0.1	0
0	0	0	0	0	0	0	0	0	0	0	0	0	0	0	0	0
0	0	0	0	0	0	0	0	0	0	0	0	0	0	0	0	0
0	0	0.1	0	0	0	0	32.99	0	0	0	0.8	0	0	0.1	0	8.26
0	0	0.1	0	0	0	0	59.99	0.1	0	0	18.66	0	0	0.1	0	2.44
0	0	0	0	0	0.1	0	0.1	0	0	0	0	0	0	0	0	0
0	0	0	0	0	0	0	0	0	0	0	0	0	0	0	0	0.3
0	0	0	0	0	0	0	2.5	0	0	0	0	0	0	0	0	0.1
0	0	0	0	0	0	0	0	0	0	0	0	0	0	0	0	0
0.1	0	0	0	0	0	0	0	0	0	0	0	0	0.1	0	0.1	0
0.1	0	0	0	0	0	0	0	0	0	0	0	0	0	0	0.1	0
0.1	0	0	0	0	0	0	0	0	0	0	0	0	0	0	0.1	0
0	0	0	0	0	0	0	0	0	0	0	0	0	0	0	0	0
0	0	0	0	0	0	0	0	0	0	0	0	0	0	0	0	0
0	0	0	0	0	0	0	0	0	0	0	0	0	0	0	0	0
0	0	0	0	0	0	0	0	0	0	0	0	0	0	0	0	0
0	0	0	0	0	0	0	0	0	0	0	0	0	0	0	0	0
0	0	0	0	0	0	0	0	0	0	0	0	0	0	0	0	0
0.1	0	0	0	0	0	0	0	0	0	0	0	0	0	0	0	0
0.1	0	0	0	0	0	0	0	0	0	0	0	0	0	0	0.1	0
0.1	0	0	0	0.1	0	0	0	0	0	0	0	1	0.1	0	0.1	0
0	0	0	0	0.1	0.1	0	0	0	0	0	0	1.1	0.1	0	0.1	0
0	0.1	0	0	0	0.1	0	0	0	0	0	0	0.1	0.1	0	0.1	0
0	0	0	0	0	0.1	0	0	0	0	0	0	0	0.1	0	0.1	0
0	0	0	0	0.1	0	0.1	0	0	0	0	0	0.1	0	0	0.1	0
0	0.1	0.1	0	0.1	0	0.1	0	0.1	0	0	0	0.1	0	0	0	0
0	0.1	0.1	0	0.1	0.1	0.1	0	0.1	0	0	0	0	0	0	0	0
0	0	0	0	0	0	0	0	0	0	0	0	0	0	0	0	0
0	0	0	0	0	0	0	0	0	0	0	0	0	0	0	0	0
0	0	0	0	0	0	0	0	0	0	0	0	0	0	0	0	0
0	0	0	0	0	0	0	0	0	0	0	0	0	0	0	0	0
0	0	0	0	0	0	0	0	0	0	0	0	0	0	0	0	0
0	0	0	0	0	0	0	0	0	0	0	0	0	0	0	0	0
0	0	0	0	0	0	0	0	0	0	0	0	0	0	0	0	0
0.1	0.1	0	0.1	0	0	0	0	0	0.1	0.1	0	0	0	0	0	0
0.1	0.1	0	0	0	0	0	0	0	0.2	0.2	0	0	0	0	0.1	0
0	0	0	0.1	0	0	0	0	0	0.1	0.1	0	0.1	0	0	0	0
0	0.1	0	0	0	0	0.1	0	0	0.1	0.1	0	0	0	0	0	0
0	0.1	0	4	0	0	0	0	0	1.8	1.4	0	0	0	0	0	0
0	0.1	0	2.04	0	0	0	0	0	1.1	0.8	0	0	0	0	0	0
0	0.1	0	1.63	0	0	0	0	0	1.5	1.1	0	0	0	0	0	0
0	0.1	0	0.1	0	0	0	0	0	0.1	0.1	0	0.1	0	0	0.1	0
0.1	2.5	0	73.65	0.9	0.1	0	0	0	43.61	48.78	0	0.1	0.1	0	0.1	0
0.1	0.1	2	0.1	1.37	2.5	0	0	6.31	0.1	0.1	0	0.1	1.2	0	0.1	0
0.1	0.1	3.1	0	0	0.1	0	0	0	0	0	0	0.1	2.1	0	0.1	0
0.1	0	0	0	0	0	0	0	0	0	0	0	0.1	0.1	0	0.1	0
0	0	0	0	0	0	0.4	0	0	0	0	0	0.1	0.1	0	0.1	0
0	0	0	0.1	0	0	0.1	0	0	2.83	2.3	0	0.1	0	0	0	0
0	0.1	0	44.04	0.9	0	0	0	0	24.44	26.29	0	0	0	0	0	0
0	0.1	0	14.58	0.1	0	0	0	0	13.96	15.7	0	0	0	0	0	0
0	0	0	0	0	0	0	0	0	0	0	0	0	0	0	0	0
0	0	0	0.1	0	0	0	0	0	0.1	0.1	0	0	0	0	0	0
0	0	0	0	0	0	0	0	0	0	0	0	0	0	0	0	0
0	0	0	0.1	0	0	0	0	0	0	0	0	0	0	0	0	0
0	0	0	1	0	0	0	0	0	3.1	2.6	0	0	0	0	0	0
0	0.1	0	5.3	0.1	0	0	0	0	7.5	7.3	0	0.1	0	0	0.1	0
0	0.1	0	21.16	0.1	0.1	0	0	0	21.07	23.11	0	0.1	0.1	0	0	0
0	0	0.1	0	0	0	0	0.1	0.1	0	0	0	0.1	0	0	0.1	0.1
0	0	0	0	0	0	0	0	0	0	0	0	0.1	0.1	0	0.1	0
0	0	0	0	0	0	0	0	0	0	0	0	0.1	0.1	0	0.1	0
0	0	0	0	0	0	0	0	0	0	0	0	0.1	0.1	0	0.1	0
0	0	0	0	0	0	0	0	0	0	0	0	0.1	0	0	0.1	0
0	0	0	0	0	0	0	0	0	0	0	0	0	0	0	0	0
0	0	0	0	0	0	0	0	0	0	0	0	0	0	0	0	0
0	0	0	0.1	0	0	0	0	0	0.1	0.1	0	0	0	0	0	0.2
0	0	0	0.2	0	0	0	0	0	4.3	4	0	0	0	0	0	0.1
0	0	0.1	2.3	0	0	0	0	0.1	0.1	0.1	0	0	0.1	0	0	0.1
0	0.1	5	0.1	0	0.1	0	0.1	1.3	0	0	0.1	0	0.1	0.1	0.1	0.6
0	0.1	1.5	2.31	0	0.3	0	5	1.7	10.08	10.5	0.1	0	0.1	0.1	0	9
0	0	3	0	0	0	0	12.4	1.33	0	0	7.23	0	0	0.1	0	25.63
0	0.1	0.1	6	0	0	0	0.5	0.1	8	7.9	0.1	0	0	0.1	0	0
0	0	0.8	0.1	0.1	0.1	0.1	0.1	0.6	0.1	0.1	0	0	0	0.1	0	0.1
0	0	4.1	0	0	0	0	0.1	0.1	0	0	1.42	0	0	0.1	0	0.1
0	0	0.1	0	0	0	0	0.1	0.1	0	0	0.3	0	0	0	0	0
0	0	0	0	0	0	0	6.49	0	0	0	0.2	0	0	0	0	0.1
0	0	0	0	0	0	0	2.2	0	0	0	0.1	0	0	0	0	0
0	0	0	0	0	0	0	0	0	0.1	0.1	0	0	0	0	0	0
0	0	0	0.1	0	0	0	0	0	0	0	0	0	0	0	0	0
0	0	0	0	0	0	0	0	0	0	0	0	0	0	0	0	0
0	0	0	0	0	0	0	0	0	0	0	0	0	0	0	0	0
0	0	0	0	0	0	0	0	0	0	0	0	0	0	0	0	0
0	0	0	0	0	0	0	0	0	0	0	0	0	0	0	0	0
0	0	0	0	0	0	0	0	0	0	0	0	0	0	0	0	0
0	0	0	0	0	0	0	0	0	0	0	0	0	0	0	0	0
0	0	0	0	0	0	0	0	0	0	0	0	0	0	0	0	0
0	0	0	0	0	0	0	0	0	0	0	0	0	0	0	0	0
0	0	0	0.1	0	0	0	0	0.1	0.6	0.4	0	0	0	0	0	0
0	0.1	0.1	0	0	0	0	0	0.1	0	0	0	0	0	0	0	0
0	0.1	0.1	0.4	0	0	0	0.3	0.1	1.6	1.3	0.1	0	0	0.1	0	0
0	0.1	0.1	0	0	0	0	4.2	0.1	0	0	0.1	0	0	0.1	0	8
0.1	0.1	0.8	0.1	0	0	0	21.42	0.5	0.6	0.5	11.22	0	0	0.6	0	6.1
0	0	0.1	0	0	0.1	0	33.97	0	0	0	1.1	0	0	0	0	3.1
0	0.1	0.1	16.74	0	0	0	7.2	0.1	23.04	24.27	0.1	0	0	0	0	1.6
0.1	0.1	5.1	16.4	0	0	0.1	10.73	0.1	29.4	33.92	0.1	0	0.1	0.1	0.1	2.93
0.1	0.1	12.26	14.19	0.1	0.1	0.1	3.2	2.55	11.44	12.23	26.2	0	0.1	5.6	0	4.3
0	0	2.61	0	0	0	0	14.8	0	0	0	5.4	0	0	3.7	0	0.5
0	0	0	0	0	0	0	0.1	0	0	0	0	0	0	0	0	0
0	0	0	0	0	0	0	0	0	0	0	0	0	0	0	0	0
0.1	0	0	0	0	0	0	0	0	0	0	0	0	0	0	0	0
0	0	0	0	0	0	0	0	0	0	0	0	0	0	0	0	0
0	0	0	0	0	0	0	0	0	0	0	0	0	0	0	0	0
0	0	0	0	0	0	0	0	0	0	0	0	0	0	0	0	0
0	0	0	0	0	0	0	0	0	0	0	0	0	0	0	0	0
0	0	0	0	0	0	0	0	0	0	0	0	0	0	0	0	0
0	0	0	0	0	0	0	0	0	0	0	0.1	0	0	0	0.1	0
0.1	0	0	0	0	0	0	0	0	0.1	0.1	0.1	0	0	0	0.1	0
0.1	0	0	0	0	0	0	0	0	0	0	0.1	0	0.1	0	0.1	0
0.1	0	0	0	0	0	0	0	0	0.1	0.1	0	0	0	0	0	0
0.1	0	0	0.1	0	0	0	0	0	0.1	0.1	0.1	0	0.1	0.1	0	0
0.1	0	0	0	0	0	0.1	0	0	0	0	0	0.1	0	0	0.1	0
0.1	0.1	0	0	0.1	0.1	0.1	0	0.1	0	0	0	0.1	0.1	0	0.1	0
0	0	0	0	0	0.1	0	0	0	0	0	0	0.1	0.1	0	0.1	0.1
0.1	0	0.1	0	0	0	0	0	0.1	0.1	0.1	0	0	0	0	0.1	0
0.1	0	0	0	0	0	0	0	0	0	0	0	0	0.1	0	0.1	0.1
0.1	0	0	0	0	0.1	0	0.2	0	0	0	0	0	0.1	0	0	4
0.25	0	0	0.1	0	0	0	0	0	0.1	0.1	0	0	0	0	0.1	0
0.1	0	0	0.1	0	0	0	0.1	0	0	0	0	0	0	0	0	0.1
0.1	0	0	0	0	0	0	0	0	0	0	0	0	0	0	0	0
0.1	0	0	0.1	0	0	0	0	0	0.1	0.1	0	0	0	0	0	0
0.1	0	0	0.3	0	0	0	0	0	0	0	0	0	0	0	0	0
0	4.6	0	25.5	0	0	0	0	0.1	26.1	29.08	0	0	0	0	0	0.1
0	0.1	3.3	4.6	0	0.1	0	0	8.3	8.9	9.1	0.1	0	0	0.3	0	1.6
0	0	1.8	0	0	0	0	16.72	0.1	0	0	15.6	0	0	7.7	0	6.5
0.1	0	0	0	0	0	0	10.03	0	0	0	0.9	0	0	0.3	0	0
0	0.1	0	0	0.4	0	0	4.6	0	0	0	0.1	0.1	0.1	0	0	0
0.1	0.1	0	0	0.1	0	0	2.5	0	0	0	2.1	0.1	0.1	0	0	0
0.1	0.1	0	0	0	0.1	0	0.1	0	0.1	0.1	0.7	0	0.1	0	0.1	0
0.4	0	0	0.1	0.1	0.1	0	0	0	0.1	0.1	0.2	0.1	0.1	0.1	0.1	0
0.1	0.1	0	0	0.1	0.1	0	0.9	0	0	0	9.6	0	0.1	0.1	0.1	0.5
0.1	0	0.7	0	0	1.4	0	7.7	0.1	0	0	18.37	0	0.1	1.7	1	5.74
0.1	0	0	0	0	0	0	16.12	0	0	0	29.75	0	0	0	0.1	0.1
0.1	0	0	0	0	0	0	0.1	0	0	0	0.1	0	0.1	0	0.1	0.4
0.1	0	0	0	0	0	0	0.1	0	0	0	0.1	0	0	0.1	0.1	0.7
0.1	0	0	0	0	0	0	0.1	0	0	0	0.1	0	0.1	0	0.1	0.1
0.1	0	0	0	0	0	0	0	0	0	0	0.1	0	0.1	0	0.1	0
0.1	0.1	0	0	0	0	0.1	0	0	0	0	0.1	0	0	0	0.1	0
0.1	0.1	0	0	0.1	0.1	0	0	0	0	0	3.1	0	0.1	0	0.1	0
0.1	0.3	0	1.3	1.04	0.1	0	0.2	0	0.5	0.4	24.81	0	0.1	0.1	0.1	0.1
0.1	0.1	0	0.1	0.1	0.1	0	0.1	1.3	0.1	0.1	18.92	0.1	0.2	0.1	0.1	0
0.1	0	1.8	0.1	0	1.2	0	6.7	2.1	0.1	0.1	0.1	0.1	1.99	2.45	0.1	0.1
0.1	0.1	0	0.1	0	0.1	0	15.59	0.1	0.1	0.1	16.17	0	0.1	0.1	0	4.7
0	0.1	0.1	0.3	0.1	0.1	0	6.8	0	0.1	0.1	24.66	0	0.3	0.1	0	6.5
0	0	0	0	0.1	0.1	0	8.86	0	0	0	15.65	0.1	0.1	9.13	0.1	13.8
0.1	0.1	0	0.4	0.1	0.1	0	4.33	0	1.7	1.33	2.6	0.1	0.1	11.29	0.1	2.4
0.1	0.1	0.1	1.3	0.1	0	0	5.6	0.2	0.1	0.1	2.2	0.1	0.2	0.1	0.1	1.9
2.4	0.1	0.1	0.1	0.1	0.1	0	7.5	0.1	0.1	0.1	8.2	0	0.1	6.9	0.3	7.7
0.1	0	0	0	0.1	0.1	0	16.51	0.1	0	0	9.5	0	0.1	4.3	0.1	7.4
0.5	0	0	0	0	0.1	0	1.9	0	0	0	7.7	0.1	0.1	0.1	0.1	1.4
4.3	0	0	0	0	0	0	3.7	0	0	0	0.6	0	0.7	0	0.1	0
0.1	0	0	0	0	0	0	4.83	0	0	0	3.4	0	0.1	0	0	0.1
0.1	0	0	0	0	0	0	1.2	0	0	0	0.3	0	0	0	0.1	0
0	0.1	0	0.1	0	0	0	1.5	0	0.1	0.1	0.1	0	0	0	0	0
0.1	0	0.1	0	0.1	0	0	0.1	0	0	0	0.8	0	0.1	0	0	0
0.1	0	0	0	0	0	0	0	0	0	0	18.3	0	0.1	0.1	0	0.1
0.1	0	0	0	0	0	0	0.1	0	0	0	11.3	0	0	0	0	0
0.1	0	0	0	0	0	0	0.1	0	0	0	0.4	0	0	0	0	0.1
0.1	0	0	0	0	0	0	0.5	0	0	0	0.3	0	0	3.4	0	0
0.1	0.1	0	0	0.1	0.1	0	8.2	0	0	0	3.1	0	0.1	0.1	0	0.6
0.5	0.1	0.1	0.1	0.1	0.1	0	3.8	0	0	0	3	0	0.2	4.3	0.1	6.4
0.1	0.1	0.7	0.1	0.1	0.1	0	4.8	0	0.1	0.1	0.1	0.1	0.2	1.2	0.1	6.4
0.4	0.1	0	0.1	0.1	0.8	0	6.4	0	0.1	0.1	0.1	1.7	2.43	3.11	1.36	0.7
1.8	0.1	0	0	0	0.1	0	1.9	0	0	0	3.8	0.6	0.1	3.1	1.9	0.9
1.8	0.1	0	0.1	0.1	0.1	0	4.6	0	0.1	0.1	3.3	0.4	0.3	1.9	3.4	0.7
0.1	0.1	0.1	1.7	0.2	2.2	0.1	3.4	0.1	2.88	2.31	1.5	4.4	3.9	2.57	0.4	1.7
0.1	0.4	3.9	10.1	6.37	5.06	0	2.4	0.1	3.5	3.1	4.8	0.1	1.2	22.23	0.1	11.2
17.22	0.1	24.86	0.1	3.2	4.6	0	35.02	1	1.09	0.8	30.3	0.1	0.1	24.54	0.1	24.08
4.4	0.1	10.3	0	0.1	2.4	8.4	14.12	0.1	0	0	17.61	0.1	0.1	0.1	0.1	1.7
0.1	0	0	0	0.1	0.1	28.89	2	0	0	0	18.91	0.1	0.1	0	0.1	0.1
0.1	0.1	0	0.1	0.1	0.1	162.42	1.8	0	0	0	0.1	0	0	0	0.1	0.1
0.1	0.1	0	0.9	0	0.1	64.86	0.1	0	0.1	0.1	1.1	0.1	0	0	0.1	0
0.1	0	0	0	0	0.1	11.22	0	0	0.1	0.1	7.1	0.1	0	0	0.1	0
0.2	0.1	0	0	0	0.1	0.1	0.1	0	0	0	20.11	0	1.3	0	0.1	0
8.7	0	0	0	0	0.1	0	0.5	0	0	0	26.88	0.1	7.4	0.1	0.2	0
0.1	0	0	0	0	0	0	0.8	0	0	0	11.95	0.1	1.8	0.1	4.28	0.1
11.2	0	0	0	0.1	0.1	0.1	1.48	0	0	0	2.1	0	0.1	3.9	46.61	0.1
0.1	0	0	0	0	0	0.1	5.4	0	0	0	0.2	0.1	0.1	18.14	0.1	15.4
0.1	0	0	0.1	2.14	0	0.1	13.49	0	0	0	0.1	0	0	0.1	0.1	12.01
0.5	0	26.79	0	0	0.1	0.1	31.76	0.1	0	0	0.1	0.1	0.1	3.4	0.1	44.59
1.8	0	318.36	0	0.1	0.9	0.1	16.1	6.8	0	0	24.42	0.1	0.1	8.8	0.1	27.23
0.6	0.1	110.36	0	0	0.1	0.1	1.7	0.1	0	0	15.7	0	0.1	8.5	0.1	18.01
0.1	0.1	32.25	0	0.1	0	0.1	0.4	0	0	0	0.1	0	0.7	43.37	0.1	21.2
1.1	0.7	24.45	0	0.1	0	0.1	0.4	0	0	0	4.9	0.1	0.64	2.6	0.1	6.7
2.7	0.1	25.69	0.1	1.9	1.6	0.1	14.52	0.7	0.1	0.1	0.1	0	1.6	4.7	0.1	50.58
29.22	1.1	14.94	0	0.1	0.1	0	17.5	0.1	0.1	0.1	25.4	0.4	1.26	97.75	1.6	19.5
47.69	0.1	0.1	0	0.1	0.1	0	3.4	0	0	0	19.7	0.1	29.22	33.86	81.43	8.59
0.1	0	0	0	0	0.1	0	10.49	0	0	0	9.06	9.26	0.1	0.1	19.53	0.1
2	0	0	0	0.1	0.1	0	0	0	0	0	6.9	0.1	0.1	0	0.1	0
0.1	0	0	0	0.1	0.1	0.1	0	0	0	0	2.83	0.1	0	0	0.1	0
0.1	1.5	0	0.1	0	0.1	0.1	0	0	0.1	0.1	0.3	0.1	0	0	0.1	0
0.1	0.1	0	0.3	0	2.15	1	0	0	0.1	0.1	2	0.1	0	0.1	0.1	0
0.1	0.1	0	0	0	0.2	2.05	0.1	0	0	0	7.3	0.1	0.1	0.1	0.1	0.1
0.8	0	0	0	0	0.1	0.1	1.8	0	0	0	12.89	0.1	0.1	6.2	0.1	0.9
5.7	0	0.1	0	0	0.1	0.1	3.7	0	0.1	0.1	0.1	0.1	0.1	3.4	0.1	2.21
28.05	0.3	0	0.1	7.55	1.5	0.1	5.36	0.1	0.1	0.1	5.1	2.3	84.38	3.82	12.51	0.9
10.2	2.49	0.1	0.1	7.2	5.6	0.1	12	0	0.8	0.6	0.2	16.29	90.16	5.24	25.74	4.7
0.8	4.2	0.53	0.1	15.4	32.24	0.1	10	0.1	5.3	5	6	6.7	41.19	4.73	1.8	9.03
[truncated: 25,376 more rows]

## Sheet: RCP 8.5
Dharwad	Durgapura	Faizabad	Hisar	Indore	Jabalpur	Junagarh	Kalyani	Kanpur	Karnal	Ludhiana	Malda	Niphad	Parbhani	Patna	Pune	Ranchi
0	0	0	0	0	0	0	0	0	0	0	0	0	0	0	0	0
0	0	0	0	0	0	0	0	0	0	0	0	0	0	0	0	0
0.1	0	0	0	0	0	0	0.1	0	0	0	0	0	0	0	0	0
0.1	0	0	0	0	0	0	0	0	0	0	0	0	0	0	0.1	0
0.1	0	0	0	0	0	0	0	0	0	0	0	0.1	0.1	0	0.1	0
0	0	0	0	0	0	0	0	0	0	0	0	0	0	0	0.1	0
0	0	0	0	0	0	0	0	0	0	0	0	0	0	0	0	0
0	0	0	0	0	0	0	0	0	0	0	0	0	0	0	0	0
0	0	0	0	0	0	0	0	0	0	0	0	0	0	0	0	0
0	0	0	0	0	0	0	0	0	0	0	0	0	0	0	0	0
0	0	0	0	0	0	0	0	0	0	0	0	0	0	0	0	0
0	0	0	0	0	0	0	0	0	0	0	0	0.1	0	0	0	0
0	0	0	0	0	0.1	0	0	0	0	0	0	0.1	0	0	0	0
0	0	0	0	0	0	0	0	0	0	0	0	0.1	0.1	0	0	0
0	0	0	0.1	0	0	0	0	0	0.1	0.1	0	0.1	0	0	0	0
0	0	0	0	0	0	0	0	0	0	0	0	0.1	0	0	0	0
0	0	0	0	0	0	0	0	0	0	0	0	0	0	0	0	0
0	0	0	0	0	0	0	0	0	0	0	0	0	0	0	0	0
0	0	0	0	0	0	0	0	0	0	0	0	0	0	0	0	0
0	0	0	0	0	0	0	0	0	0	0	0	0	0	0	0	0
0	0	0	0	0	0	0	0	0	0	0	0	0	0	0	0	0
0	0	0	0	0	0	0	0	0	0	0	0	0	0	0	0	0
0	0	0	0	0	0	0	0	0	0	0	0	0	0	0	0	0
0	0	0	0	0	0	0	0	0	0	0	0	0	0	0	0	0
0.1	0	0	0	0	0	0	0	0	0	0	0	0	0	0	0	0
0.1	0	0	0	0	0	0	0	0	0	0	0	0	0	0	0	0
0.1	0	0	0	0	0	0	0	0	0	0	0	0	0	0	0	0
0.1	0	0	0	0	0	0	0	0	0	0	0	0	0	0	0.1	0
0.1	0	0	0	0	0	0	0	0	0	0	0	0	0	0	0.1	0
0.1	0	0	0	0	0	0	0	0	0	0	0	0	0	0	0	0
0	0	0	0	0	0	0	0	0	0	0	0	0	0	0	0	0
0	0	0	0	0	0	0	0	0	0	0	0	0	0	0	0	0
0	0	0	0	0	0	0	0	0	0	0	0	0	0	0	0	0
0	0	0	0	0	0	0	0	0	0	0	0	0	0	0	0	0
0	0	0	0	0	0	0	0	0	0	0	0	0	0	0	0	0
0	0	0	0	0	0	0	0	0	0	0	0	0	0	0	0	0
0	0	0	0	0	0	0	0	0	0	0	0	0	0	0	0	0
0	0	0	0	0	0	0	0	0	0	0	0	0	0	0	0	0
0	0	0	0	0	0	0	0	0	0	0	0	0	0	0	0	0
0	0	0	0	0	0	0	0	0.1	0	0	0	0	0	0	0	0
0	0	0.1	0	0	0	0	0	0.1	0	0	0	0	0	0.1	0	0
0	0	0	0	0	0	0	0	0	0	0	0.1	0	0	0	0	0
0	0	0	0	0	0	0	0	0	0	0	0	0	0	0	0	0.1
0	0	0	0	0	0	0	0	0	0	0	0.1	0	0	0	0	0.1
0	0	0	0	0	0.1	0	0	0	0	0	0.1	0.1	0	0	0.1	0
0	0.1	0	0.1	0.1	0.1	0	0	0.2	0.1	0.1	0	0.1	0	0	0.1	0
0	5.6	0.1	42.35	0.1	0.1	0.1	0	5.8	13.53	15	0	0.1	0	0	0	0
0	0.1	0	9.61	0.9	0.1	0	0	0.4	8	7.9	0	0	0	0	0	0
0	0.1	0	6.8	0.1	0	0	0	5.8	0.1	0.1	0	0	0	0	0	0
0	0.1	0.1	0.1	0	0	0	0	0.1	0.83	0.6	0	0	0	0	0	0
0	0	0	0	0	0	0	0	0	0	0	0.1	0	0	0.1	0	0
0	0	0	0	0	0	0	0	0	0	0	0	0	0	0	0	0
0	0	0	0	0	0	0	0	0	0	0	0	0	0	0	0	0
0	0	0	0	0	0	0	0	0	0	0	0	0	0	0	0	0
0	0	0	0	0	0	0	0	0	0	0	0	0	0	0	0	0
0	0	0	0	0	0	0	0	0	0	0	0	0	0	0	0	0
0	0	0	0	0	0	0	0	0	0	0	0	0	0	0	0	0
0	0	0	0	0	0	0	0	0	0	0	0	0	0	0	0	0
0	0	0.1	0	0	0.1	0	0	0	0	0	0	0	0	0	0	0
0	0	0	0	0	0.1	0	0	0	0	0	0	0	0	0	0	0.1
0	0	0	0	0	0.1	0	0	0	0	0	0	0	0	0	0	0.1
0	0	0	0	0.1	0	0	0	0	0	0	0	0	0	0	0	0
0	0	0	0	0.1	0	0	0	0	0	0	0	0.1	0	0	0	0
0	0	0	0	0.4	0	0	0	0	0	0	0	0	0	0	0	0
0	0	0	0	0.1	0.1	0	0	0	0	0	0	0	0	0	0	0
0	0	0	0.1	0	0	0	0	0	0.1	0.1	0	0	0	0	0	0
0	0.1	0	0.5	0.1	0	0	0	0.1	0.4	0.3	0	0	0	0	0	0
0	0	0.1	1.5	0	0	0	0	0.1	0.1	0.1	0	0	0	0.1	0	0
0.1	0	0	0.1	0	0	0	0	0	0.2	0.2	0	0	0	0	0	0
0	0	0	0.5	0	0	0	0	0	3.1	2.6	0	0	0.1	0	0.1	0
0	0.1	0	13.38	0.1	0	0.1	0	0.1	10.6	11.33	0	0	0	0	0.1	0
0.1	0.1	0.97	0	0	0	0	0	1	0.1	0.1	0	0	0	0.1	0	0
0	0	3.7	0	0	0.1	0	0.1	0.1	0	0	1.1	0	0	4.2	0	0.2
0	0	0	0	0	0	0	0.1	0	0.1	0.1	0.1	0	0	0	0	0.1
0	0	0	0	0	0	0	0.1	0	0	0	0	0	0	0	0	0.1
0.1	0	0	0	0	0	0	0.1	0	0	0	0	0	0	0	0	0
0.2	0	0	0.3	0	0	0	0	0	0.1	0.1	0	0	0.1	0	0	0.1
0.1	0	0	4.84	0	0	0	0	0.1	8.4	8.2	0	0	0.1	0	0.1	0
0.1	0.1	0.1	0	0.1	0	0	0	0.1	0.1	0.1	0	0.1	0	0	0.1	0.5
0	0	0	0	0	0.1	0	0.1	0	0	0	0.1	0.1	0.1	0	0.1	0.1
0	0	0.1	0	0	1.3	0	0.1	0.1	0	0	0	0.1	0.1	0	0	0.1
0	0	0.1	0	0	0.1	0	0.1	0	0	0	0.1	0.1	0	0.1	0.1	3.1
0	0.1	0.1	0	0	0.1	0	0	0.1	0	0	0	0	0	0	0.1	0.1
0	0	0.1	0	0.1	0.1	0	0	0.1	0	0	0	0.1	0	0	0.1	0.1
0	0	0	0	0	0	0	0.1	0	0	0	0	0	0.1	0	0.1	0.1
0.1	0	0	0	0	0	0	0	0	0	0	0	0	0.1	0	0.1	0
0.1	0	0	0	0	0	0	0	0	0	0	0	0	0	0	0	0
0.1	0	0	0	0	0	0	0	0	0	0	0	0	0	0	0.1	0
0.1	0	0	0	0	0	0	0	0	0	0	0	0	0	0	0	0
0.1	0.1	0	0.1	0.1	0	0.1	0	0	0	0	0	0.1	0	0	0	0
0	0.1	0.1	0	0.4	0.1	0	0	0.1	0	0	0	0.1	0	0.1	0	0.1
0	0.1	0.1	0	0	0.1	0	2.6	0	0	0	0.1	0.1	0.1	0.1	0.1	0.3
0.1	0	0	0	0.1	0.1	0	0.1	0.2	0	0	0	0.1	0.1	0	0	0.1
0.1	0	0	0	0.1	0	0	1.3	0	0	0	0	0.1	0.1	0	0.1	0.1
0.1	0	0	0	0.1	0.1	0	0.1	0	0	0	0	0.1	0.1	0	0.1	0.1
0.1	0	0	0	0	0.1	0	0	0	0	0	0	0	0.1	0	0.1	0
0.1	0	0	0	0	0	0	0	0	0	0	0	0	0	0	0.1	0
0.1	0	0	0	0	0	0	0	0	0	0	0	0.1	0	0	0	0
0.1	0	0	0	0.1	0	0	0	0	0	0	0	0.1	0	0	0	0.1
0.1	0	0	0	0	0	0	0.1	0	0.1	0.1	0.1	0	0	0	0.1	0
0	0	0	0.1	0	0	0	0	0	0.1	0.1	0.1	0	0.1	0	0.1	0
0	0.1	0	1.63	0	0.1	0	0	0.1	0.6	0.5	0.1	0	0.1	0	0.1	0.1
0.1	1.6	9.4	6.2	0	0.5	0	0.1	1.14	1.5	1.1	0.1	0	0.1	0.4	0	1.11
0.1	0	0	0	0	0	0	2.1	0.1	0	0	0.3	0	0	0	0.1	0.3
0.1	0.1	0	0.1	0	0.1	0	1.95	0	0	0	0	0	0.1	0	0	0.1
0.1	0	0.1	0.1	0.1	0.1	0	0.1	0.1	0	0	0.1	0	0.1	0	0.1	0.1
0.1	0.1	0	0	0	0.1	0	0	0.1	0	0	0	0	0.1	0	0	0.5
0.1	0	0	0.1	0	0.1	0	4.4	0	0	0	0.1	0	0.1	0	0	0.1
0.1	0.1	0	0.2	0	0	0.1	0	0.1	0.7	0.6	0.1	0	0.1	0	0	0
0.1	0	2.7	0.2	0	0.1	0	0	0.1	1	0.8	0.1	0	0.2	0	0	0.1
0	0.1	4.9	0.1	0	0.2	0	0.1	0.1	0.1	0.1	0.1	0	0.1	0.43	0	0.9
0.1	0.1	0	0	0	0	0	19.18	0.1	0.1	0.1	0.1	0	0	0	0	0.1
0	0.5	0	0	0	0	0	0.1	0.1	0.1	0.1	3.1	0	0	0	0	0.1
0	0.1	4.1	1	0	0.1	0	0	0.2	0.1	0.1	1.48	0	0	0.1	0	0.1
0	0.1	0	0.1	0.1	0.1	0	2.4	0	0.1	0.1	0.1	0	0	0	0	0.1
0	0.6	0	4.7	0.1	0.4	0	10.44	0.1	2.8	2.3	0	0	0	0	0	0.1
0.1	0.1	0	8.4	0.1	0.1	0.1	5.3	0.1	11.32	12.12	0.1	0	0.1	0	0	0.1
0	0	2.8	1.6	0	0.1	0	1.6	0.1	2.6	2	5.1	0	0	0.1	0	0.5
0.1	0.1	7.3	2.3	0	0.1	0	6.25	0.1	3.5	3.1	4.7	0	0	0.9	0	5.1
0.1	0	0.4	0.1	0	0.1	0	7.4	0.5	0	0	5.4	0	0	6.1	0	4.7
0	0	0	0	0	0	0	4.95	0.1	0	0	18.2	0	0	0.6	0	0.4
0	0	0	0	0	0	0	3.6	0	0	0	0.1	0	0	0	0	3.8
0	0	0	0	0	0	0	0.2	0	0	0	0.77	0	0	0	0.1	0.1
0.1	0	0	0	0	0	0	0	0	0	0	0.2	0	0	0	0	0
0.1	0	0	0	0	0	0	0	0	0	0	5.2	0	0	0	0	0
0.1	0	0	0	0	0	0	6.6	0	0	0	0.1	0	0	0	0	0
0.1	0	0	0	0	0	0	1	0	0	0	0.1	0	0	0	0.1	0.9
0.1	0	0	0	0	0	0	0.1	0	0	0	0.1	0	0.1	0.1	0.1	0.1
0.9	0	0	0	0	0	0.1	0.1	0	0	0	0.1	0	2.1	0	0.1	0.3
3.5	0	0	0	0	0.1	0	0	0	0	0	0.1	0	1.6	0	0.1	0
3.8	0	0	0	0	0.1	0	0	0	0	0	0	0	0.1	0.1	0.1	0
0.1	0.1	0	0	0	0.1	0	1.1	0	0	0	0.1	0	0.1	0	0.1	0.1
0.1	0.1	0.2	0	0	0	0	16.23	0	0	0	2	0	0	4.8	0.1	42.87
0.1	0.1	0.1	0	0	0.1	0	82.67	0	0	0	10.51	0	0	12.49	0.1	81.12
0.1	0	0	0	0	0	0	86.08	0	0.1	0.1	41.72	0	0	10.9	0.1	2.4
0.1	0	0	0	0	0	0.1	4	0	0	0	0.1	0	0	2	0.1	0.1
0.1	0	0	0	0	0	0.1	0	0	0	0	0.1	0	0	0	0.1	0
0.1	0	0	0	0	0	0.1	0	0	0	0	0.1	0	0	0	0	0
0.1	0	0	0	0	0	0	0.2	0	0	0	0.4	0	0.1	0	0	0
0.1	0	0	0	0	0	0	3.8	0	0	0	0.1	0.1	0.1	0.1	0.1	0
0.5	0	0	0	0	0	0	4.5	0	0	0	10.1	0	0.1	0.1	0.1	0.1
1.3	0	0	0	0	0	0	2	0	0	0	18.51	0	0	0.1	0	0.1
0.1	0	0	0	0	0	0.1	7.8	0	0	0	11.95	0	0.7	0.1	0	0.1
0.1	0	0	0	0	0	0	6	0	0	0	18.24	0	0.4	0.2	0.1	0.1
0.1	0.1	0	0	0.1	0.1	0.1	5.9	0	0.1	0.1	8.35	0	0.1	4.8	0.1	0.69
2.72	0	0	0.1	0	0.2	0.1	1.3	0	0.1	0.1	6.4	0.1	0.1	2.5	0.1	0.1
5.8	0.4	0.1	0	0.4	1.9	0	7.5	0	0	0	19.85	0	21.39	5.78	0.1	0.2
25.52	0	0	0	0.1	0.1	0	10.9	0	0	0	11.8	3.38	11.73	6.99	8.4	31.1
1.2	0.1	0	0	0.1	0.1	0.1	28.14	0	0.1	0.1	3.87	0.89	3.5	5.5	0.1	92.71
0.1	0.1	0	0	0.9	0.1	0.1	49.88	0	0.1	0.1	55.73	0.9	1.8	11.2	0.1	14.59
0.1	0.1	0.1	0	1	0.5	0.1	19.5	0	0	0	74.37	0.1	0.1	0.1	0.1	0.1
1.8	0	0	0	0	0.1	0.1	5.3	0	0	0	18.43	0	4.4	0.1	0.1	0
0.3	0	0	0.1	0	0.1	0.1	1.5	0	0	0	1.2	0	1.9	0.1	0.1	0.1
0.2	0.1	0	0.1	0	0.1	0.65	7	0	0	0	0.1	0	0.1	0.1	0.1	0.3
0.1	0.1	0	0	0	0.1	0.1	10	0.1	0	0	0.1	0	0.1	0.1	0.1	0.1
0.1	0.1	0	0.1	0	0.1	0.1	30.6	0	0	0	0.1	0	0.1	0.1	0.1	0.1
0.1	0.1	0	0	0	0.1	0.1	9.2	0.1	0	0	11.8	0.1	0	0.1	0.1	0
0.1	0	0	0	0	0	0.1	0	0	0	0	10.08	0.1	0	0	0.1	0.1
0.1	0	0	0	0	0	0.4	0	0	0	0	0.9	0.1	0.1	0	0.1	0
0.1	0	0	0	0	0	0.9	0	0	0	0	14.27	0.1	0	0.1	0.1	0.1
0.1	0	0	0	0	0	0.2	0	0	0	0	2.57	0.1	0	0	0.1	0
0.1	0	0	0	0	0	0.1	0	0	0	0	4.8	0	0.1	0	0.1	0
0.3	0	0	0	0	0.1	0.1	0	0	0	0	0.1	0.1	0.1	0	0.1	0
0.1	0	0	0	0	0.1	0.1	0	0	0	0	18.3	0.1	0	0	0.1	0
0.3	0	0	0	0	0.1	0.1	0	0	0	0	41.13	0.1	0	0.1	0.1	0
0.8	0	0	0	0	0.1	0.1	0	0	0	0	39.95	0.1	0	0.1	0.1	0
0.3	0	0	0	0	0.1	0.1	0.1	0	0	0	51.54	0.1	0.1	7.53	0.1	0
2.2	0	2.6	0	0.1	0.1	0.1	0.2	0	0	0	30.5	0.1	29.15	6.3	0.1	0.1
53.96	0.8	5.1	0	1.9	0	10.27	0.1	0.1	0.1	0.1	1.75	72.21	85.95	6.71	33.79	0.1
3.2	5.76	0.4	0.1	1.2	0.1	112.19	0.1	0.1	0.3	0.3	7.6	1.2	0.1	7.53	1.08	0.1
0.2	1	0.1	15.09	0.1	0.1	1.5	0.2	6.47	17.37	19.82	25.46	0.1	0.1	3.85	0.7	2.6
0.2	0.1	0.2	0.1	0.1	0.1	1	13.83	0.1	4.5	4.1	52.47	0.1	0.1	25.19	0.1	2.4
0.1	0	10.5	0	0.1	0.1	1	27.63	0.6	0.1	0.1	46.24	0.1	0.1	16.7	0.2	15.14
0.1	0	13.86	0	0.1	0.1	0.1	0.4	0.1	0.1	0.1	126.27	0.1	0.1	43.33	0.1	2
0.4	0	0.1	0	0.1	0.7	0.1	0.1	0.1	0.1	0.1	31.12	0.1	0.1	0.1	0.1	0.3
2.4	0	0	0	0	0.79	0.1	4.8	0.1	0.1	0.1	33.99	0.1	0.1	0.1	0.1	5.1
0.6	0	0	0	0.1	0.46	0.1	0.1	0.1	0.1	0.1	37.05	0.2	0.1	0.1	0.1	5.9
2.7	0.1	0	0	0.1	2.9	0.1	0.1	0	0.1	0.1	24.83	0.1	0.4	3.73	0.1	0.1
2.1	0	0	0	0.1	2.4	0.1	0	0.1	0.1	0.1	0.4	0.1	24.16	3.7	0.4	0
10.2	0.1	0.1	0	0.2	0.1	0.1	0.1	0	0.1	0.1	0.1	0.1	1.6	0.1	4.1	0
2.4	0.1	0.1	0	4.2	5	0.1	0.1	2.1	0	0	0.1	48.96	47.71	0.9	3.04	0.1
9.85	0	3	0	0.1	0.1	5.4	0.1	0	0	0	1	29.77	25.76	0.1	11	0.1
7.6	0.1	15.1	0	0.1	8.39	0.1	2	1.4	0	0	8.9	0.1	3.6	0.3	0.1	2.3
2.7	0.25	0	0	15.51	35.44	0.1	1	5.76	0	0	0.1	4	21.95	0.1	5.1	5.2
0.9	1.8	0	0.1	9.9	7.56	0.1	9.4	0	0	0	0.6	49.26	37.73	0.1	26.09	32.24
0.3	0.7	9.1	0.1	0.1	96.7	0.1	16.87	0.1	0.1	0.1	8.1	29.94	26.74	14.5	5.37	15.66
1.7	2.1	0.1	0.1	38.79	49.61	0.1	13.47	0.1	0	0	0.4	2.7	0.1	0.7	0.1	0.1
7.79	5.6	0.1	0.3	69.39	7.91	0.71	6.5	0.4	0.5	0.4	2.6	0.4	4.2	1.9	0.1	2.9
3.2	1.2	12.46	12.19	15.51	16.89	1	2.2	2.1	2.1	1.6	1.44	2.7	0.1	2.4	0.9	13.9
6.6	2.3	0.1	0	17.84	8.65	4.61	7.8	2.1	0.1	0.1	0.1	6.2	5.2	0.1	4.19	11.68
12.55	8.3	0	0.8	0.9	7.72	15.6	19.7	0.1	0.1	0.1	2.3	47.75	17.02	0.7	10.49	23.4
1.8	9.6	0.4	0.1	8.5	35.83	11.42	11.42	1.1	1.1	0.84	18.42	4.3	0.1	9.7	4.1	2.9
0.8	8.2	18.6	0.3	3.6	9.83	14.05	9.5	7.7	5	4.6	20.04	1	0.1	20.55	9.56	4.1
2.8	5.9	50.11	15.27	0.1	6.2	7.6	11.4	13.5	17.42	19.89	48.21	0.9	0.1	35.45	0.6	17.38
1.7	4.7	97.02	0.1	0.1	4	0.2	0.7	63.82	0.1	0.1	49.61	2.9	0.1	44.3	2.6	15.6
4.2	0.1	66.34	0.7	3.3	7.9	1.83	3.9	35	0.8	0.6	47.11	4.5	0.1	50.62	0.9	8.9
0.9	0.1	18.57	0.2	2.6	6.1	0.7	12.24	8.37	5.45	5.17	31.04	8.3	0.4	29.53	1.8	8.93
0.1	0.1	56.53	0.1	1	22.97	0.1	2.6	11.95	3.1	2.6	29.65	3.3	2	30.27	4.87	9.69
2.3	13.32	45.72	21.4	0.1	2.9	0.1	1.1	38.37	2.1	1.6	0.5	2	0.1	0.9	12.17	2.6
3.8	12.1	24.9	0.1	3.3	0.2	0.5	2.2	0.1	0.1	0.1	1.9	3.76	4.1	0.1	7.83	10.39
10.87	19.47	3.8	5.6	5.99	14.92	1.3	0.5	2.2	0.1	0.1	1.44	4.2	30.94	1	2.1	3.3
6.88	9.2	0.1	0.1	8	13.7	10.4	0.8	0.1	4.1	3.74	1.1	3.5	36.61	0.1	3.4	2.8
0.6	0.3	0.1	0.1	23.51	5.6	47.95	0.8	0.1	0.1	0.1	0.1	9.83	0.62	0.1	4.7	2.6
2.2	2.13	0.1	0.1	41.37	12.8	27.95	0.2	0.1	0.2	0.2	2.9	9.5	0.1	0.1	1.3	0.1
0.9	0.1	4.68	0.1	3.74	1.9	41.36	0.3	1.9	0.1	0.1	1	1.7	1.94	0.1	0.3	4.8
0.4	9.77	28.74	17.72	0.1	7.6	27.98	11.6	12.8	28.87	32.91	4.5	3.5	0.1	0.1	1.48	24.95
1.7	15.01	0.1	67.82	0.1	30.83	9.9	9.02	22.5	38.71	44.96	26.68	0.7	0.1	9.47	0.2	25.42
1	9.01	6.35	33.28	2.3	37.13	0.9	0.2	0.8	33.24	38.09	3.2	0.8	0.1	5.2	0.1	0.5
1.2	22.81	5.92	12.5	9.9	33.36	1.3	2.54	11.94	11.64	12.39	0.1	1	0.1	0.1	0.5	0.7
0.3	35.43	0.1	0	28.81	12.16	9.37	0.1	0.1	0.1	0.1	0.1	0.1	0.1	0.1	0.1	4.6
0.1	18	0.1	0.1	0.3	5.6	5.1	7	0.5	0.1	0.1	0.1	0.8	0.1	0.1	0.8	32.37
4.16	1.8	1.1	18.77	0.3	0.1	1.1	26.59	1.33	19.92	22.39	0.5	1.32	0.1	0.1	1.82	44.7
7.1	0.1	15.1	0.1	0.1	8.87	5.4	33.84	6.8	24.27	25.9	8.1	1.8	0.1	0.9	1.2	48.1
3	0.1	0.1	4.2	0.1	14.88	1.2	70.31	11.43	2.61	2.1	0.5	0.2	2.8	0.6	5.7	52.65
2.8	4.42	4.96	0.1	0.5	21.2	1.59	76.55	10.89	4.47	4.1	7.93	0.1	0.6	0.1	4.1	54.5
3	0.1	14.8	0.1	0.1	12.2	1.8	102.59	25.26	2	1.6	4	0.2	0.1	0.1	1.1	25.25
5.6	0.3	26.52	0.9	0.1	30.69	0.1	64.06	15.94	12.72	14	49.79	0.5	0.1	10.39	0.9	3.3
1.1	0.1	50.49	0.1	0.1	17.2	0.1	8.35	3.96	0.1	0.1	43	0.2	0.1	89.65	0.4	0.9
0.4	0.1	51.16	0.1	0.1	0.1	0.1	10.5	3	0.1	0.1	34.6	0.1	0.1	27.7	0.4	2.2
0.9	0.1	82.23	0.1	0.1	0.1	0.1	5	28.26	0	0	36.24	0.1	0.1	28.03	0.1	0.8
2.4	0	93.45	0.1	0.1	0.1	0.1	11	17.85	0	0	32.6	0.1	0.1	43.34	0.1	8.09
1.2	0	60.1	0	0.1	0.1	0.1	12.5	42.75	0	0	25.15	0.1	0.1	22.11	0.1	24.39
2.7	0.1	20.73	1.3	0.1	0.8	0.1	3	39.94	2.6	2.1	7.7	0.1	0.1	10.28	0.1	1.5
15.77	32.76	0.2	12.68	9.9	17.52	0.1	0.7	7.08	0.2	0.2	0.1	0.1	6.8	0.1	0.6	0.5
17.18	15.6	0.1	0	10.3	11.1	8.19	0.3	0.6	0.1	0.1	0.1	0.4	8.99	0.1	7.3	0.1
27.03	1.4	0.1	0	8.03	4.2	2.8	0.1	0.1	0.3	0.2	0.1	0.4	9.05	0.1	12.3	0.1
6	2.4	0.1	0.2	20.06	0.1	2.74	4	0.1	15.4	17.7	0.1	21.86	47.36	0	9.3	0
3.8	0.1	0.1	0	5.4	0.3	18.74	0.1	0	2.8	2.3	2.6	5.55	24.23	0.6	9.1	0.5
4.4	3.01	0.8	0	13.51	13.1	0.1	0.1	0.1	0.1	0.1	0.4	0.4	15.81	0.1	9.99	0.8
0.1	0.1	8.83	0.4	7.6	4.1	0.1	0.1	2.4	3.44	3	0.1	2.8	3.4	1.5	0.1	0.1
0.1	0.1	1	0.1	0.1	5.9	0.2	0.1	3.99	3.44	3	0.1	0.5	1	0.1	0.1	0.1
0.5	0.1	0.1	9.2	0.1	4.63	0.1	0.1	6.3	15.26	17.32	0.1	0.1	10.01	0.1	1.3	0.1
1.7	4.77	0	2.3	0.1	4.4	0.5	0.1	0.1	15.54	17.97	0.1	1.4	21.6	1.1	7.3	0.1
6.85	1.9	0.1	2.3	11.7	3.5	0.1	0.1	0.1	7.7	7.57	0.1	2.79	58.97	0.1	34.77	0.1
3.44	0.2	0.1	4.9	29.02	6.1	1	0.1	0.1	17.84	20.12	0.1	2.3	11.2	0.1	6	0.1
2.6	2.3	0.1	0.1	26.49	1.5	0.2	0.1	0.1	0.5	0.4	0.1	22.25	11.89	0.1	2.2	0.1
1.7	4.2	0.3	0.1	2.8	0.1	0.1	0.1	0.1	0.1	0.1	0.1	0.1	0.8	0.1	2.4	0.2
2.7	1.1	2.93	0.1	2.79	0.1	0.1	0.1	0.1	0.4	0.3	0.1	0.1	11.45	7.39	9.8	0.4
3.5	0.1	8.51	0.6	0.4	9.89	0.1	0.1	0.6	5.91	5.7	1.35	0.1	23.42	3	0.8	0.1
4.3	4.2	7.7	14.62	0.1	0.1	0.1	0.4	4.1	3.8	3.4	0.3	0.1	23.38	0.2	0.1	0.1
3.7	9	0	0.7	0.9	13.1	0.1	0.4	0.5	0.8	0.6	1.1	0.1	3.4	0.1	0.1	0.2
8.6	3.4	0.1	0.1	1.1	28.73	0.1	0.2	0.1	0.1	0.1	0.1	0.1	0.1	1.05	0.1	0.2
0.9	3.9	0.1	0	15.61	45.24	0.1	0.1	0.1	0.1	0.1	0.1	1.9	0.3	1.2	0.1	0.1
0.1	5.21	0.2	0.1	13.8	28.9	0.1	0.1	2.3	1.31	1	0.1	0.1	0.1	0.1	0.1	0.1
0.1	12.1	0.9	2.38	3.2	0.4	0.1	3.8	20.09	4.4	4.1	3.6	0.1	0.1	0.8	0.1	0.9
0.1	0.1	2.3	0	0.1	1.6	0.1	7.3	2.1	0.1	0.1	16.4	0.1	0.1	11.2	0.1	6.9
0.1	0	28.1	0	0	0.7	0.1	16.3	1.2	0.1	0.1	33.3	0.1	2	21.2	0.1	9.5
0.2	0	30.9	0	0	0.2	0.1	0.1	0	0	0	26.47	0.1	25.64	39.77	0.1	7.18
0.8	0	47.14	0	0	12.5	0.1	0.1	1.7	0	0	0.5	0.1	15.81	7.3	0.1	3
0.1	0	19.35	0	0.1	16.72	0	0	36.52	0	0	0.1	5.93	1.6	0.1	2.06	0.1
8.1	0.1	0.1	0	0.1	8.34	0.1	0	8.66	0	0	0.1	3.5	4	0	0.1	0.1
1.1	0	0.1	0	0	1.5	0	0	1.5	0	0	0.1	1.9	1.7	0.1	1.9	0.1
17.26	0	0.1	0	0	0.1	0	0	0.79	0	0	12.7	1.6	2.8	0.1	7.06	0.1
14.9	0	0.1	0	0	0.1	0	0	0.1	0	0	2.2	2.2	11.19	4.4	19.28	0
20.02	0.1	0	0	0.1	0.1	0	0.1	0.1	0	0	0.2	17.29	0.3	0.1	36.8	0
2.2	0.1	0	0	0.1	0.1	0.1	0	0.1	0	0	0.1	1.3	5.3	0.1	0.6	0.1
0.4	0.1	0.1	0.1	0.1	1.9	0.5	0.1	0.1	0	0	0.1	0.2	1.3	0	2.3	0.1
3	0.2	0	0	4.8	5.15	0.1	3.9	0.1	0	0	0.1	0.1	0.1	0	0.1	0.2
4.1	0.1	0	0	5.68	5.73	0.1	0.1	0.1	0	0	0.1	0.1	9	0.1	0.1	0.1
1.3	0.1	0.1	0	0.1	0.1	0.1	10.91	0	0	0	0.3	0.1	0.1	1.2	0.1	9
0.6	0.1	16.1	0	0.1	44.86	0.1	2.05	0.75	0	0	0.1	0.1	0.3	1.5	0.1	10.39
0.5	0.1	16.2	0	1.4	83.78	0.1	0.1	7.9	0.1	0.1	0	0.3	4.5	1.78	0.1	0.6
0.1	0.1	35.3	0	4.4	56.52	0.1	0.1	54.51	0	0	3.3	0.1	1.18	5.53	0.2	0.1
0.1	0.1	37.24	0	9.09	30.4	0.1	0.2	69.59	0	0	1.9	0.5	0.1	12.37	0.1	2.2
0.2	0.1	12.4	0	0.4	33.57	0.1	0.1	59.93	0	0	0.1	0.1	0.1	2.4	0.1	0.6
0.1	0.1	5.8	0	0.1	24.2	1.1	0.1	71.37	0.1	0.1	0.1	0.1	0.1	0.1	0.1	0.1
0.1	0.1	0.1	0	0.1	28.51	0.3	0.1	16.2	0.1	0.1	0	0.1	0.1	0	0.1	0.1
0.1	0.1	0	0	0.1	21	0.1	4.8	6.4	0	0	0.1	0.1	0.9	0	0.1	0.1
0.1	0	0	0	10.57	0.1	0	5.5	0.1	0	0	0.1	20.81	48.31	0.1	26.08	1
2.56	0.1	0.1	0	2.1	0.74	0	0.5	0.1	0	0	0.1	0.2	0.6	0.1	100.13	0.4
5.8	0.1	0	0	0.47	0.3	0	0.1	1.2	0	0	0.1	2.5	2.85	0.1	12.36	0.9
0.8	0.1	0	0	0.1	0.5	0	4.3	0.1	0	0	0.1	7.53	2.2	0.9	4.7	0.1
4.8	0	5	0	0.1	0.5	0	12.73	0.1	0	0	0.1	8.51	60.66	3.3	1.3	0.8
13.14	0.1	0	0	0.1	4.52	0	4.4	0.1	0	0	2.2	12.75	36.01	0.1	33.8	12.53
27.01	0.1	3.3	0	0.1	11.33	0	0.4	0.1	0	0	0.1	21.93	44.63	2.5	47.16	0.6
27.09	0.1	20.95	0	0.1	20.79	0.1	1.2	9.8	0	0	2.8	4.4	33.95	7.7	27.75	0.1
1.6	0.1	12.3	0	1	16.76	0.1	0.8	46.71	0.1	0.1	1.8	0.1	15.1	2.8	3.8	0.1
0.2	0	23.77	0	0.1	3.1	0.1	1.7	15.15	0	0	4.4	0.1	4.7	0.7	0.1	0.1
1.8	0.1	9.93	0	0	0.1	0.1	0.1	0	0	0	1.4	0	6.5	12.02	0.1	1.3
29.14	0	0	0	0	0.7	0.1	2.1	0	0	0	21.84	0.1	0.3	0.1	8.5	1.1
10.3	0.1	0	0	0	0.1	0	1.2	0	0.1	0.1	0.1	3.1	0.1	0.1	0.1	0.1
0.1	0.1	0	0	0	0	0	0.1	0	0	0	0.1	0.26	0.1	0	0.1	0.1
8.24	0.1	0	0	0	0	0	0.1	0	0	0	0.7	0	0.1	0	0.1	0.1
1.8	0.1	0	0.1	0	0	0	0.1	0	0.3	0.3	0.6	0	0.1	0.6	0.1	0.1
10.17	0.1	0.1	0	0	0.1	0	15.4	0	0.1	0.1	0.1	0.1	0.1	0.1	0.1	0.4
3.9	0	0.1	0.1	0	1.1	0	17.68	0.1	0	0	0.2	0.1	0.1	2	0.1	9.4
17.41	0.1	10	0	0.1	1.2	0	14.67	0.3	0	0	1.2	0.1	0.7	23.84	0.1	11.4
4.5	0	16.48	0	0.1	3	0	7.2	4.4	0	0	15.52	0.1	0.8	13.4	1.6	0.2
0.1	0	0.9	0	0	2.57	0	9.2	0.9	0	0	14.7	0.1	0.1	5.6	0.1	0.1
0.1	0	0	0	0	0.1	0	6.7	0.1	0	0	1.6	0	0	4.3	0.1	0.3
0.1	0	0	0	0	0.1	0	17.53	0	0	0	0	0	0	0.1	0	8.8
0	0	0	0	0	0	0	7.7	0	0	0	1.43	0	0.1	0.1	0.1	0.6
0	0	0	0	0	0	0	3	0	0	0	0.1	0	0	0.1	0.1	0.1
0.1	0	0	0	0	0	0	0.1	0	0	0	0.1	0	0	0.1	0.1	0
0.1	0	0	0	0	0	0	0	0	0	0	0.1	0	0	0	0.1	0
0.1	0	0	0	0	0	0	0	0	0	0	0.1	0	0	0	0.1	0
0.1	0	0	0	0	0	0	1.3	0	0	0	0.1	0	0	0	0	0
0.1	0	0	0	0	0	0	1.5	0	0	0	0.1	0	0	0	0	0.1
0	0	0	0	0	0	0	0.2	0	0	0	0.1	0	0	0	0	0.1
1	0	0	0	0	0	0	0.1	0	0	0	0.1	0	0	0	0	0
1.1	0	0	0	0	0	0	0	0	0	0	0.1	0	0	0	0	0
0.2	0	0	0	0	0.1	0	0	0	0	0	0.1	0.1	0	0	0	0
0.1	0.1	0	0.1	0	0	0	0.1	0	1.6	1.2	0.1	0	0	0	0	0
0.1	0	0	0	0	0	0	0	0.1	0	0	0	0	0	0	0	0
0	0	0	0	0	0	0	10.68	0	0	0	0.4	0	0	0	0	0
0	0	0	0	0	0	0	5.1	0	0	0	1.1	0	0	0	0	0.1
0	0	0	0	0	0	0	0.4	0	0	0	0.1	0	0	0	0	0
0.1	0	0	0	0	0	0	8	0	0	0	0	0	0	0	0	0.1
3.4	0	0	0	0	0	0	0.1	0	0	0	0.1	0	0.1	0	0.1	0.2
6.2	0	0	0	0	0.1	0	0	0	0	0	0.1	0.1	0.1	0	0.1	0.1
0.5	0	0	0	0	0	0	0	0	0	0	0.1	0	0.1	0	0.1	0
0.1	0	0	0	0	0	0	0	0	0	0	0	0	0.1	0	0.1	0
0.1	0	0	0	0	0	0	0	0	0	0	0	0	0	0	0	0
0.1	0	0	0	0	0	0	0	0	0	0	0	0	0	0	0	0
0.1	0	0	0	0	0	0	0	0	0	0	0	0	0	0	0	0
0	0	0	0	0	0	0	0	0	0	0	0	0	0	0	0	0
0	0	0	0	0	0	0	0.8	0	0	0	0	0	0	0	0	0
0	0	0	0	0	0	0	10.36	0	0	0	0	0	0	0	0	0.1
0	0	0.1	0	0	0.2	0	21.26	0.1	0	0	0.1	0	0	0	0	0.8
0	0.1	0.1	0	0	0.5	0	10.27	0	0	0	0.1	0.1	0.1	0	0.1	2.7
0.9	0	0	0	0.5	6.6	0	0	0	0	0	0	0.1	0.1	0	0.1	0
1.21	0.1	0	0	0.27	2.9	0	0	0	0	0	0	0.1	0.1	0	0.1	0
0.1	4.5	0	0	4.8	0.1	0	0	0.1	0	0	0	0.1	1.1	0	0.1	0
0.1	0.1	0	0	2.6	0.1	0.1	0	0.1	0	0	0	0.3	0.1	0	0.1	0
0.1	0.1	0	0	0.1	0	0.1	0	0	0	0	0	0.1	0	0	0.1	0
0.1	0.1	0	0	0.1	0	0	0	0	0	0	0	0.1	0	0	0.1	0
0	0.1	0	0	0.1	0	0.1	0	0	0	0	0	0	0	0	0.1	0
0	0.1	0	0	0.1	0	0.1	0	0	0	0	0	0	0	0	0	0
0.1	0	0	0	0	0	0.1	0	0	0	0	0	0	0	0	0	0
0	0.1	0	0	0	0	0	0	0	0	0	0	0	0	0	0	0
0	0.1	0	0	0	0	0	0	0	0	0	0	0	0	0	0	0
0	0.1	0	0	0	0	0.1	0	0	0	0	0	0	0	0	0	0
0	0.1	0	0	0	0	0	0	0	0	0	0	0	0	0	0	0
0	0	0	0	0	0	0	0	0	0	0	0	0	0	0	0	0
0	0	0	0	0	0	0	0	0	0	0	0	0	0	0	0	0
0	0	0	0	0	0	0	0	0	0	0	0	0	0	0	0	0
0	0	0	0	0	0	0	0	0	0	0	0	0	0	0	0	0
0.1	0	0	0	0	0	0	0	0	0	0	0	0	0	0	0	0
0.1	0	0	0.1	0	0	0	0	0	0.1	0.1	0	0	0.1	0	0.1	0
0	0	0	0	0	0	0	0	0	0.1	0.1	0	0	0	0	0.1	0
0	0	0	0	0	0.1	0.1	0	0	0	0	0	0.1	0	0	0.1	0
0	4.2	0	14.15	0	0	0.1	0	0	2.2	1.7	0	0.1	0.1	0	0	0
0	0.1	0	2.95	0.1	0	0	0	0	0.3	0.3	0	0.1	0	0	0	0
0	0	0.1	0	0.1	0.1	0	0	2.1	0	0	0	0.1	0.1	0.1	0	0
0.1	0	0	0	0	0	0	0.1	0.1	0	0	0.1	0.1	0.1	0.1	0.1	0.1
0.1	0	0	0	0	0	0	0.8	0	0	0	0	0.1	6.1	0	0.1	0
0.1	0	0.1	0	0	0.5	0	0.1	0	0.1	0.1	0.1	0.1	9.58	0.1	0.1	0.35
0	0.1	0	0.1	0	0	0.1	0.3	0	0.1	0.1	0.1	0	0.1	0.1	0.1	7.5
0	4.5	0.1	2.9	2.1	0	0.1	0.1	0.1	0.7	0.6	0.1	0.1	0.1	1	0.1	0.8
0	0	7.3	0	2.2	0.1	0	0	0.9	0	0	0.1	0.1	0.1	0.1	0	2
0	0	11.09	0	0.1	9.5	0	0	1.16	0	0	0.1	0.1	0.1	10.07	0.1	8.32
0	0.1	0.1	0	0.1	0.1	0	0.1	0	0	0	0.1	0.1	0.1	4.91	0.1	6.2
0.1	0.1	0	0	1	3.3	0	0.1	1.6	0	0	0.1	0.1	6.3	0.8	0.1	0.6
0.1	0.1	93.63	0.1	0	17.82	0	0.1	10.2	0	0	0.1	0	19.92	13.02	0.1	0.1
0.1	0	9.63	0	0	0.1	0	0	0	0	0	6.45	0.1	0.1	30.51	0.1	4.9
0.1	0	0	0	0	0	0	1.8	0	0	0	0.1	0.1	0.5	0	0.1	0.2
0	0	0	0	2.9	0	0.1	0.1	0	0	0	0	1.6	0.1	0	0.1	0
0.1	0	18.46	0	4.1	9.96	0.1	0	5.1	0	0	0.1	2.4	0	1.2	0.1	0
0.1	0	0.4	0	0	0	0	0	0	0	0	1.8	0.1	0.1	7.33	0.1	0.1
0	0	0	0	0	0	0	0	0	0	0	0	0	0.1	0	0.1	0
0.1	0	0	0	0.1	0	0	0	0	0	0	0	0.1	0.1	0	0.1	0
0	0	0	0	0.1	0	0	0	0	0	0	0	2.05	0.6	0	0.1	0
0.1	0.1	0	0	0.2	0.1	0	0	0.1	0.1	0.1	0	2.8	0.1	0	0.1	0
0.1	9.2	0	25.58	2.7	0	0	0	1.24	21.49	23.36	0	1.4	0	0	0	0
0.1	0	2.1	0	0.1	0.7	0	0	0.17	0.1	0.1	0	0.1	0.1	0.1	0.1	0.1
0.1	0	0.1	0	0	0.1	0	0	0	0	0	0	0.1	0.1	0	0.1	0.1
0.1	0	0	0.1	0	0	0	0.1	0	0.3	0.3	0	0.1	1.6	0	0.1	0
0.1	0.1	0.1	2.2	0	0.3	0	0.1	0	2.4	1.9	0.1	0	0.3	0.7	0.1	0.7
0.1	0	0	0	0	0.1	0	2.4	0	0	0	0.1	0	0.1	1.9	0.1	13.9
0.1	0	0	0	0	0.1	0	0.1	0	0	0	0.1	0.1	0.1	0	0.1	0.1
0.1	0	0	0	0	5.8	0	0	0	0	0	0	0.1	0.1	0	0.1	0.1
0.1	0	0	0	0	0	0	2.34	0	0	0	0.1	0.1	1.07	0.1	0.1	3.2
0.1	0	0	0	0	0	0	0.1	0	0	0	0	0.1	0.1	0	0.1	0
0.1	0	0	0	0	0.1	0	0	0	0	0	0	0.1	0.2	0	0.1	0
0.1	0	0	0	0	0	0	0	0	0	0	0	0.1	0.1	0	0.1	0
0.1	0	0	0	0	0	0	0	0	0	0	0	0.1	0.1	0	0.1	0
0.1	0	0	0	0.1	0.1	0	0	0	0	0	0	0	0.7	0	0.1	0
0.1	0	0	0	0	0.1	0	0	0	0	0	0	0	1.3	0	0.1	0.1
0.1	0	0	0	0	1	0	0	0	0	0	0	0.7	12.47	0	0.1	0.3
0.1	0	0.1	0	0	0.1	0	0.1	0	0	0	0.1	0.1	6.8	0.1	0.1	2.1
0.1	0	0	0	0	0	0	0	0	0	0	0	0	0.1	0	0.1	0.1
0.1	0	0	0	0	0	0	0	0	0	0	0	0	0	0	0	0
0.1	0	0	0	0	0	0	0	0	0	0	0	0	0	0	0	0
0	0	0	0	0	0	0	0	0	0	0	0	0	0	0	0	0
0	0	0	0	0	0	0	0	0	0	0	0	0	0	0	0	0
0	0	0	0	0	0	0	0	0	0	0	0	0	0	0	0	0
0	0	0	0	0	0	0	0	0	0	0	0	0	0	0	0	0
0	0	0	0	0	0	0	0	0	0	0	0	0	0	0	0	0
0	0	0	0	0	0	0	0	0	0	0	0	0	0	0	0	0
0.1	0	0	0	0	0	0	0	0	0	0	0.1	0	0	0	0	0.1
0.1	0	0	0	0	0	0	0	0	0	0	0	0	0	0	0.1	0
0	0	0	0	0	0	0	0	0	0	0	0	0	0	0.1	0.1	0
0.1	0	0	0	0	0	0	0	0	0	0	0	0	0	0	0.1	0
0	0	0	0	0	0	0	0	0	0	0	0	0.1	0	0	0.1	0
0	0	0	0	0	0	0	0	0	0	0	0	0.1	0	0	0.1	0
0	0	0	0	0	0	0	0	0	0	0	0	0	0	0	0.1	0
0	0	0	0	0	0	0	0	0	0	0	0	0	0.1	0	0.1	0
0	0	0	0	0	0.1	0	0	0	0	0	0	0	0.1	0	0.1	0
0	0	0	0	0	0.1	0.1	0	0	0	0	0	0.1	0.1	0	0	0
0	0	0	0	0	0	0	0	0	0	0	0	0.1	0	0	0.1	0
0	0	0	0	0	0	0	0	0	0	0	0	0.1	0	0	0.1	0
0	0	0	0	0.1	0	0	0	0	0	0	0	0	0	0	0.1	0
0	0	0	0	0	0	0	0	0	0	0	0	0	0	0	0.1	0
0	0	0	0	0	0	0	0	0	0	0	0	0	0	0	0.1	0
0	0	0	0	0	0	0	0	0	0	0	0	0.1	0	0	0.1	0
0	0.1	0	0	0.1	0	0	0	0	0	0	0	0.1	0	0	0.1	0
0	0.1	0	0	0.1	0	0	0	0	0	0	0	0.1	0	0	0.1	0
0	0	0	0	0	0.1	0	0	0	0	0	0	0.1	0	0	0	0
0	0	0	0	0	0	0	0	0	0	0	0	0.1	0.1	0	0.1	0
0	0	0	0	0	0	0	0	0	0	0	0	0.1	0.1	0	0.1	0
0	0	0	0	0	0.1	0	0	0	0	0	0.1	0.1	0.1	0.1	0	0
0	0	0	0	0	0.1	0	0	0	0	0	0	0.1	0.1	0	0	0
0	0	0	0	0	0	0	0	0	0	0	0	0	0	0	0	0
0	0	0	0	0	0	0	0	0	0	0	0	0	0	0	0.1	0
0	0	0	0	0	0	0	0	0	0	0	0	0	0.1	0	0.1	0
0	0	0	0	0	0	0	0	0	0	0	0	0	0.1	0	0.1	0.1
0	0	0	0.1	0	0	0	0	0	0.1	0.1	0	0	0.1	0	0.1	0
0	0	0	0	0	0	0	0	0	0	0	0	0.1	0	0	0.1	0
0	0	0	0	0.1	0.1	0	0	0	0	0	0	0.1	0.1	0	0.1	0.1
0	0.1	0	0	0.1	0.1	0	0	0.1	0	0	0	0.1	0	0	0.1	0.1
0	0.2	0.1	6.39	0.1	0.1	0	0	0.1	0.1	0.1	0	0	0.1	0	0.1	0.1
0	0.1	0.1	0.1	0	0.1	0	0	0.1	0.1	0.1	0	0	0.1	0	0	0.1
0	0.1	0.1	0.1	0	0.1	0	0	0.1	0.1	0.1	0	0	0.1	0.1	0	0.1
0	0.1	0	0.1	0	0	0	0	0.1	0.1	0.1	0	0	0.1	0	0	0.1
0	0	0	0	0	0	0	0.1	0	0	0	0	0	0	0	0	0
0	0	0	0	0	0	0	0	0	0	0	0	0	0	0	0	0
0	0	0	0	0	0	0	0	0	0	0	0	0	0	0	0	0
0.1	0	0	0	0	0	0	0	0	0	0	0	0	0.1	0	0	0
0	0.1	0.6	0	0.1	0.2	0	0	0.1	0	0	0	0.1	0.2	0.1	0	0.1
0.1	0.1	0.1	0	0.2	1	0	0	0.1	0	0	0	0.1	0.1	0	0.1	0
0	0.4	0	0	5.1	0	1	0	0	0	0	0	0.1	0	0	0	0
0	0.9	0.1	0.1	0.1	0.1	6.3	0	0.1	0	0	0	0.1	0	0	0	0
0	0.2	0.1	1.5	4.45	0.1	0.1	0	0.1	0.1	0.1	0	0.1	0.1	0	0	0
0	1.7	10.57	0	1.4	2.6	0	0	5.3	0	0	0	0.1	0	0.3	0.1	0.1
0.1	0.1	0	0	0.1	0.2	0	0.7	0	0	0	0.1	0.1	0.1	0.1	0.1	0.2
0.1	0	0	0	0.1	0.3	0	0.2	0	0	0	0	0.4	0.1	0	0.1	0.1
0.1	0	0	0	0	0	0	0.1	0	0	0	0	0.1	0.1	0	0.1	0.1
0.1	0	0	0	0	0.1	0.1	0	0	0	0	0	0.1	0.1	0	0.1	0.1
0.1	0	0	0	0	0	0	0.1	0	0	0	0	0.1	0.1	0	0.1	0.1
0.1	0.1	0	0	0	0	0	0.1	0	0	0	0	0.1	0.1	0.1	0.1	0.1
0.1	0.1	0	0	0.1	0	0	0	0	0	0	0.1	0.6	0.1	0.1	0.1	1.6
0.1	0.1	0	0	0.1	0.1	0	3.7	0	0	0	0	0.1	0	0.1	0.1	0.1
0.1	0.1	0	0.1	0.1	0.1	0.1	0.62	0	0.1	0.1	0	0.1	0.1	0	0.1	0.1
0.4	0.1	0	0.7	0.1	0.1	0	0.1	0.1	0.1	0.1	0	0.1	0.1	0	0.1	0
0.1	0	0	0	0	0.1	0	1	0	0	0	0.1	0	0.1	0	0.1	0
1.6	0	0	0.1	0.1	0.1	0	2.6	0	0.1	0.1	1.1	0	0.1	0	0.1	0.1
0.1	0.1	0	0.9	1.6	0.1	0	0.1	0	1.5	1.1	7.18	0.1	0.1	0	0.1	0.1
0.1	0	0	0	1.21	0.1	0	0	0	0	0	0.1	0.13	0.1	0	0.1	0
0.1	0.1	0	0.3	0.2	0.1	0	0.3	0	0.1	0.1	0.1	0.1	0.1	0	0.2	0
0.1	0.1	3.1	0.1	0	0.1	0	0	0.7	0	0	0.1	0	0.1	0.1	0.1	0
1	0	0.1	0	0	0.1	0	7.5	0.1	0	0	0.1	0	0.1	0.1	0.1	3.27
0.1	0	0	0	0	0	0	9.8	0	0	0	0	0	0.1	0	0.1	0.1
0.1	0	0	0	0	0	0	0.1	0	0.1	0.1	0.1	0	0	0	0.1	0.1
0.1	0	0	0	0	0	0	0.1	0	0	0	0.1	0	0	0	0.1	0.1
0.1	0	0.1	0	0	0	0	0.86	0.1	0	0	0	0.1	0.1	0	0.1	0.1
0.1	0.1	0.1	0.1	0.1	0.1	0	5.7	0.1	0	0	0.1	0.1	0.1	0	0.1	0.2
0	0	0.1	0	0	0.1	0	15.13	0.1	0	0	1.8	0.1	0.1	0.1	0	3.2
0	0	0.1	0	0	0	0	25.59	0	0	0	8.7	0	0	0.1	0.1	5.6
0	0.1	0	0	0	0	0	1.9	0	0.1	0.1	0	0.1	0	0	0.1	0
0.1	0.7	0	0.1	0.1	0	0	0.1	0.1	0.1	0.1	0.1	0.1	0.1	0	0.1	0
0.1	0.1	0.1	0	0.1	0	0	0	0.1	0	0	0	0.1	0.1	0	0.1	0
0.1	0.2	0	0	0.1	0.1	0	0.1	0	0	0	0	0.1	0.1	0	0.1	0
0.1	0.1	0	0	0.1	0.1	0	0.1	0	0	0	0	0.1	0	0	0	0.2
0	0.1	4.1	0.1	1.1	0.1	0	3.5	0.1	0	0	3.5	0	0.1	0.1	0.1	0
0	0.3	0.1	0	0.1	0.1	0	17.27	0	0	0	38.75	0.1	0.1	4.17	0	0.1
0	0.9	0	0	0.1	0.6	0.1	0.1	0	0	0	12.5	0	0.1	0	0	1.2
0	0.1	0	0.9	0	0.1	0	2.3	0.1	0.1	0.1	15.77	0	0	0	0	0.1
0	0.1	0	0	0.1	0.1	0	7.96	0.1	0	0	14.7	0	0	0.1	0	0.1
0	0	0	0	0	0	0	2.1	0	0	0	6.4	0	0.1	0	0	0.1
0	0	0	0	0.3	0	0	2.5	0	0	0	8.79	0.1	0.1	0	0.1	0.1
0.1	0	0	0	0.1	0	0	3.4	0	0	0	18.25	0	0.1	0.1	0.1	0
0.1	0.1	0	0.1	0.1	0	0	1.7	0	0	0	33.91	0.1	0.84	0.6	0.2	0
0.1	0.1	0	0.6	0.6	0.1	0	9.73	0.1	0.1	0.1	2.4	0.5	0.9	0.2	0.2	0
0.5	0.1	0	0	2.1	0.5	0	8.5	0.1	0	0	10.2	0.8	2.2	0.9	2.92	0.1
0.1	0.1	0	0.1	0.1	0.1	0	10.2	0.1	0	0	24.98	0.7	2.7	0.1	0.1	0.7
0.1	0.1	0	0	0	0.1	0	26	0	0	0	4.7	0	0.1	0.9	0.1	1
0.1	0.1	0	0.1	0.1	0	0	15.15	0	0	0	13.3	0.1	0.1	0.1	0.1	0.1
0.1	0	0	0	0	0.1	0	0.1	0	0	0	30.25	0.1	0.1	0	0	0.1
0.1	0	0	0.1	0	0.1	0	0.1	0	0	0	26	0	0.1	0	0	0.1
0.1	0	0	0	0	0.1	0	0.1	0	0.1	0.1	28.79	0	0	0	0.1	0.1
0.1	0.1	0	0	0	0	0	0	0	0	0	12.83	0	0.1	0	0.1	0.1
0.1	0.1	0	0	0	0	0	0.1	0	0	0	0.2	0	0	0	0.1	0
4.9	0	0	0	0.1	0.1	0	0.1	0	0	0	0.1	0	0.1	0	2.5	0
0.1	0	0	0	0	0.1	0.1	0	0	0	0	4.3	6.1	1	0.1	7	0.1
0.2	0.1	0	0	0.1	0	0.1	0.1	0	0	0	1	2.5	0.4	0	0.1	0
0.1	0.2	0	0	0.4	0.1	0	0.1	0	0	0	9.4	5.3	4.2	0	0.1	0
0.1	0.1	0	0.1	0.5	0.1	0	9.4	0.1	0.1	0.1	7.5	0.1	0.1	0.1	0.1	0
0.1	0.1	0	0	0.1	1.9	0	10.7	0	0	0	0.1	0.1	0.1	0.1	0.1	0
0.1	0.1	0	0	0	0.1	0	5.42	0	0	0	0.1	0.2	0.1	0	0.1	0
0.1	0	0	0	0	0.1	0.1	0.1	0	0	0	0.1	0	0.4	0	0.1	0
0.1	0.1	0	0	3.3	0.1	0.1	0.1	0	0	0	0.1	0.1	3.4	0.1	0	0
0.1	0.2	0	0.1	0.2	0	0	10.24	0.1	0	0	0.1	1	0.1	0	0	0.2
0.1	0	0	0	0.1	0.1	0	16.54	0	0	0	0.1	0.26	0.1	0	0.1	4.9
0	0.1	0	0.1	2.65	0.1	0.1	0.1	0	0	0	0.1	0.3	0.8	0.8	0.1	0.1
0.1	0.2	0.1	0	9.91	0.1	0	0	0.1	0	0	0.1	0.5	0.1	0	0.1	0
0.1	0.1	0	0	0.1	0.1	0.1	0.1	0	0	0	0	0.1	0.1	0	0.1	1.7
0.1	0.1	0.1	0	1.5	0.1	0	15.1	0	0	0	0	0.2	0	0.3	0.1	101.79
0	0.1	1.4	0.1	1	2.57	0.1	2.5	0.1	0.1	0.1	0.1	0.1	0.1	4.4	0	37.45
0	0.1	0.1	0	0	2.2	0	2.8	0	0	0	0.1	0.1	0	0.1	0	69.86
0	0.1	0	0	0	0.1	0	18.39	0	0	0	8.4	0	0	0.1	0	24.88
0.1	0	0	0	0	0	0	9.5	0	0	0	3.7	0	0	4.5	0	43.8
0.1	0	0	0	0	0	0	54.05	0	0	0	0.1	0	0	0.1	0	14.3
0.1	0.1	0	0	0	0	0	47.61	0	0	0	0.1	0	0.1	0	0	0.4
0.1	0	0.1	0	0	0	0	71.24	0	0	0	0.1	0	0.1	0.2	0	0.3
0.3	0	0	0	0	0.1	0	84.09	0	0	0	32.02	0	0	0.1	0.1	0.1
0.1	0	0	0	0	0.1	0.1	4.3	0	0	0	18.52	0	0	1.8	0.1	0
0.1	0	0	0	0	0.1	0.1	0.3	0	0	0	0.1	0.1	0	0.1	0.1	0
0.1	0	0	0	0	0	0.1	0.2	0	0	0	0.1	0.1	0	0	0.1	0
0.1	0	0	0	0	0	0.1	0.1	0	0	0	0.1	0.1	0	0	0.1	0
3.4	0	0	0	0	0	0.1	0	0	0	0	0.1	0.1	0	0	0.1	0.1
0.1	0	0.1	0	0	0.2	0.1	0.3	0	0	0	0.1	0	0	38.03	0.1	3.7
0.2	0	3	0	0	0.1	0.1	33.98	0	0	0	1	0.1	2.3	7.91	0.1	32.33
0.2	0	0	0	0	0	0.1	8.7	0	0	0	0.1	0.1	0.1	2.2	0.1	0
0.1	0	0.1	0	0	0.1	0.1	14.9	0.1	0	0	0.1	0.1	0.1	3.9	0.4	0.1
2.2	0	0.1	0	0	0	0.1	3.9	0	0	0	0	0	0.1	5.2	0.1	0.1
108.14	0	0.1	0	0	0.1	0.1	0.9	0	0	0	0.1	0	10.63	6.27	0.1	5.3
111.25	0	0.53	0	0.1	0.1	0.1	77.66	0	0	0	3.1	0.1	4.6	0.9	59.83	14.87
0.5	0	0.1	0	0.1	4.1	0	22.34	0.4	0	0	4.9	0.1	6.75	4.5	0.1	79.94
0.1	0.1	20.08	0	3.6	97.54	0.1	3.5	4.6	0	0	0.1	0.1	0.1	7.4	0.1	6.7
0.1	0.1	10.57	0	82.98	35.98	0.1	0.3	0.7	0	0	0.1	15.8	0.4	1.1	0.1	2.6
0.1	6.54	0.1	0	277.12	0.4	3.6	0.8	0.1	0	0	0.3	13.8	2.39	0.1	0.1	0.1
0.1	4.23	0	0	37.65	0.4	0.2	3.33	0	0.1	0.1	7.3	1.2	0.7	0	0.1	0.1
0.1	0.1	0.1	0	0.2	0.1	75.78	4.44	0.1	0.1	0.1	47.45	0.1	0.1	2.7	0.1	1.7
0.1	0	0.1	0	0.1	0.1	28.66	5.73	0	0	0	130.14	0.1	0.1	43.12	0.1	0.2
0.1	0	0.9	0	0.1	0.1	2.2	8.05	0	0.1	0.1	109.31	0.1	0	1.9	0.1	0.6
0.1	0.1	0	0.2	0.1	0.1	0.1	1.1	0	0.1	0.1	21.4	0.1	0.1	0.7	0.1	0.1
0.1	0	0	0.1	0.1	0	0.1	0.6	0	0.1	0.1	14.5	0.1	0.1	0.1	0.1	0.1
0.1	0	0	0	0.1	0	0.1	1.4	0.1	0	0	4.7	0.1	0.1	0.1	0.1	0.1
0.7	0	0.1	0	0.1	0	0.1	2.2	0	0	0	9.9	0.1	0.1	0.1	0.1	0.1
0.4	0	0	0	0	0	0.1	0.1	0	0	0	7.97	0.1	0	0.1	0.1	0.1
1.5	0	0	0	0	0	0.1	0.1	0	0	0	8.6	0.1	0.1	0	0.1	0
1.5	0	0	0	0	0	0.14	0.1	0	0	0	0.1	0.1	0.1	0	0.1	0
0.1	0	0	0	0	0	0.8	0.1	0	0	0	10.1	0.1	0.1	1.6	0.1	0
0.1	0	0	0	0	0.1	0.6	10.73	0	0	0	34.95	0.1	0.1	10.3	0.1	0.1
0.1	0	0	0	0	0	0.1	61.89	0	0	0	12.8	0.1	0.1	0.1	0.1	1.2
1.6	0	10.77	0	0.1	0	0.1	30.9	0	0	0	2.26	0.1	0	8.5	0.1	15.32
0.6	0	13.43	0	0.1	0	0.1	134.22	0.47	0	0	24.4	0.7	0.1	2.64	0.1	42.17
0.7	0	10.59	0	0.1	0.1	1.2	33.97	5.1	0	0	187.46	0.4	0.1	52.22	0.1	5.2
0.5	0	0.1	0	0.1	0	0.2	14.29	0	0	0	150.4	0.1	0.1	43.78	0.4	0.1
0.7	0	0	0	0.1	0	2.5	0.1	0	0	0	74.74	0.2	0.1	3.9	0.5	0.5
6	0	0.5	0	0.1	0	0.2	17.28	0	0	0	18.9	0.1	0.1	22.91	0.4	3.23
2.4	0	0.1	0	0	0.1	0.1	22.77	0	0	0	0.9	0.1	0.1	12.5	0.1	31.41
0.8	0	8.9	0	0	0.1	0.1	23.36	0	0	0	2.4	0.1	0.1	0.1	0.1	48.36
2.4	0	3.9	0	0	1.4	0.1	11.67	0	0.1	0.1	19.19	0.1	0.1	14.1	0.1	39.34
1.5	0	0.1	0	0	0.27	0.1	29.54	0.1	0.1	0.1	19.4	0.1	0.1	6.92	2.01	11.7
1.6	0	0.1	0	0	0.1	0.1	43.6	0.1	0	0	26.3	0.1	0.1	0.3	23.59	9.2
1.89	0	0.2	0	0	0.1	0.9	18.39	0.1	0	0	27.84	0.1	10.45	3.9	29.99	5.2
8.47	0	1	0	0	0.1	0.3	9.7	0.1	0.1	0.1	30.29	0.1	21.1	33.46	9.1	2.3
3.3	0	4.1	0	0.1	2.7	1.37	0.1	0	0	0	53.33	0.1	10.3	28.23	5.9	0.5
7.9	0	14.2	0	0	0.6	0.9	4	0	0	0	109.58	0.1	1.64	48.08	1	0.4
1.5	0	9.2	0	0	0.1	0.3	2.6	0	0.1	0.1	75.54	0.1	0.1	102.76	0.1	6
1.3	0	32.95	0	0	0.1	0.1	0.8	0	0	0	55.73	0.1	0.1	102	0.1	13.9
0.8	0	20.64	0	0	0.1	0.1	0.4	0	0	0	36.91	0.1	0.1	93.04	0.1	5
3.7	0	0.6	0	0	0	0.1	9.6	0	0	0	56.43	0.1	0.1	49.25	0.1	2.1
0.1	0	0.1	0	0.1	0	0.1	8.2	0	0	0	119.39	0.3	0.1	3.1	0.1	0.1
0.1	0	0.1	0	0.1	0	0.8	0.6	0	0	0	74.62	0.6	0.1	16.03	0.1	0.1
0.2	0	0.1	0	0.1	0	0.9	0.1	0	0	0	48.39	0.7	0.1	29.73	0.1	0.1
2	0	21.6	0	0.1	0.1	0.1	8.6	0.1	0	0	31.53	0.2	0.1	30.49	0.1	0.3
2.4	0	54.76	0	0.1	0.1	0.1	3.5	0.1	0.1	0.1	27.15	0.2	0.1	3.1	0.1	6.75
1.63	0	16.26	0	0.1	0.1	0.1	25.83	0.9	0	0	3.3	0.4	0.1	4.5	0.1	11.4
3	0	30.41	0	0.1	0.3	0.3	30.1	1.7	0.1	0.1	3.7	0.1	3.78	3	9	43.74
0.9	0	0.1	0	0.2	13.51	0.9	7.9	0.1	0.1	0.1	38.32	2	19.22	22.22	1	18.49
0.1	0.1	37.72	0	0.2	12	0.1	28.12	3.5	0.1	0.1	21.86	2.7	2	25.17	11.28	44.73
0.2	0.2	24.42	10.25	3.3	34.86	0.1	19.59	5.7	4.82	4.42	3	1.9	15.52	1.3	4.19	32.35
2.37	0.1	4.9	7.09	7	38.84	5.2	12.18	2.5	11.84	12.74	1.8	23.67	19.88	4.42	17.5	3.5
1.1	18	0	0.2	43.36	11.9	43.26	3.9	0.1	2	1.5	0.2	15.01	0.5	0.1	0.9	15.21
0.3	5.42	0.1	0	9.29	12.86	82.47	0.1	0.1	0.3	0.3	0.1	13.2	0.6	0.1	1.9	7.24
3	1	0.2	0.1	0.1	11.9	24.27	0.6	0.1	0.2	0.1	0.1	5.2	0.1	0.1	4.3	0.1
6.28	0.1	14.1	0.1	0.1	0.3	6.3	1.2	1.1	0.1	0.1	0.1	0.6	0.8	0.1	0.2	1.6
3.2	0	10.3	0.1	0.2	25.27	0.1	0.1	3.8	0.1	0.1	0.2	0.5	9.2	0.1	6.37	0.1
2.7	0.1	0	0.1	1.95	21.52	0.1	1.11	0.1	5.3	5	1.2	1.5	9.6	2.4	32.83	3.6
1.7	2.7	0.1	7.2	8.83	28.54	0.1	4.7	0.1	54.69	58.42	4	1.7	12.22	0.7	34.88	1.75
5.1	0.1	0.1	0.1	22.05	15.48	0.1	0.2	0.1	0.1	0.1	0.9	48.87	6	0.1	0.1	0.2
3.6	0.5	0.1	0	26.46	0.1	67.91	0.1	0.1	0.1	0.1	1.9	31.2	0.1	0.1	12.59	0.1
0.6	0	8	0	0.6	0.1	52.8	0	0.1	0.1	0.1	4.7	1.8	0.7	5.1	0.1	0.3
0.5	0.1	29.02	12.83	0.1	0.9	2.5	0.1	8.4	18.51	20.93	21.86	0.1	0.1	42.86	0.8	2.6
3.5	0.1	69.29	3.8	0.1	5.3	0.1	0.2	60.49	9.8	10.08	11.58	0.1	0.1	44.18	0.1	13.9
3.62	30.85	1.92	25.66	2.2	12.12	0.1	0.5	38.13	26.8	30	0.1	0.1	0.1	3.5	6.2	0.5
1.8	49.87	0.1	2.3	7.2	1.2	0.1	0.1	4.29	0.6	0.4	0.3	0.1	10.1	0.1	19.05	0.1
1.5	0.1	0.4	4.2	0.1	0.2	0.1	0.1	0.1	3.1	2.7	0.1	0.2	1.8	0.1	1.9	1.5
1.7	0.1	0.2	0.1	0.1	6.6	0.2	0	0.1	7.31	7.01	0.1	0.1	0.1	0.5	0.2	11.99
1.8	0.1	0.4	0.1	0.1	1.2	1.9	0.8	0.1	0.9	0.7	10.08	0.1	0.7	5.5	3.4	3.9
3.2	0.1	18.51	0.1	0.1	3	1.1	0.1	0.1	0.6	0.5	3.56	0.1	0.73	15.78	3	0.9
2.9	0	24.56	0.1	0.1	23.6	0.2	0.1	35.13	0.1	0.1	0.1	0.6	0.2	0.1	2.1	0.5
1.8	0.4	0.1	5.3	8.9	34.09	0.2	1.4	9.76	0.4	0.3	1.1	0.9	6.68	1.4	5.65	0.69
3	0.1	9.4	0.1	0.3	4.2	6.3	0.3	0.5	0.1	0.1	0.1	6.07	4.4	0.1	9.44	0.1
13.53	0.1	28.16	0	0.47	0.1	5.1	2.3	0.1	0.1	0.1	0.1	20	9.3	0.1	19.9	6.1
2.2	0.1	3.18	0	0.2	1.9	2.8	0.1	10.78	0.1	0.1	0.1	8.1	7.7	0	25.11	12.21
6.9	0.1	0.1	0	0.1	0.2	4.2	2.6	0.1	0	0	0.1	1.2	2.69	4.1	19.76	5.9
6.9	0	6.35	0	0.1	0.1	1	31.24	0.1	0	0	0.1	1.8	0.4	1.1	5.7	44.34
10.7	0	0.1	0	0.3	9.6	0.1	63.29	0.1	0	0	0.8	2.1	0.1	0.4	32.22	79.3
8.6	0	0.1	0	0.1	16.31	2.74	14.7	0.1	0	0	2.57	0.8	1.1	2.4	1	36.49
14.97	0.1	3.8	0	7.2	29.93	0.5	6.1	8.6	0	0	7.8	2.7	0.6	0.1	0.3	0.4
6.07	0.54	0.1	0.1	3.7	5.3	1.5	3.2	1.3	0.1	0.1	3.7	2.4	0.1	0.1	0.3	2.6
7.1	3.4	0.1	0.1	1.1	23.07	2.74	0.9	0.1	1.13	0.9	14.5	3.39	0.1	2.4	1.5	0.9
8.94	1.3	0.1	0	1.41	28.79	0.7	0.1	0.2	0.1	0.1	9.6	1.1	1	2.5	8.3	0.6
5.59	0.1	0.53	0	4.3	18.38	3.7	1.4	0.7	0.1	0.1	0.1	0.9	37.58	0.1	1.3	0.2
4.1	8.9	0.1	0.1	7.5	1.2	0.6	0.1	0.1	0.1	0.1	0.1	24.29	41.46	0.1	24.87	0.2
15.98	0.4	0	0.2	11.7	0.4	0.1	0.1	0	2.6	2.1	0.1	0.2	0.6	0.1	23.69	0.1
20.64	1.9	0	16.53	13.99	5.1	0.1	0.4	0	13.96	15.7	0.1	2.7	24.26	0	13.3	1.1
7.8	0	0	0.1	29.95	9.7	0.5	5.1	0.1	6.1	5.9	2.2	88.38	67.34	0.1	1.92	0.6
8.4	0.1	0.1	0.1	8.43	0.1	44.36	1	0.1	1	0.8	4.4	48.93	0.7	2.8	18.72	0.1
1	0.6	1.92	0	2.5	0.3	18.09	0.9	0.1	0.1	0.1	12.45	4	0.1	0.3	2.9	1.65
0.8	6.86	6	11.09	1.65	5.2	0.1	0.1	0.4	9	9.31	0.1	0.1	1.9	1.7	1.9	2.6
2.7	0.4	10.5	13.57	0.2	8.77	0.1	0.1	8.4	11.3	12.1	7.1	0.1	0.5	13.75	0.1	0.4
1.5	0.1	29.59	24.35	0.1	11.78	0.1	0.1	49.42	37.71	43.97	2.5	0.1	0.1	6.9	0.1	1.6
3.1	11.93	22.83	0.1	0.1	7.2	0.4	0.3	33.77	0.5	0.4	3.3	0.2	0.1	11.3	0.28	0.58
2.7	0.7	26.28	0.1	0.1	10.1	0.1	0.1	18.6	0.1	0.1	1	1.4	0.1	10	8.4	4.7
1.6	0.1	33.51	0	0.1	9.4	0.1	0.1	20.54	0.4	0.3	3.7	0.1	9.9	12	1.6	0.5
1.9	0	35.3	0	0	8.92	0.1	0.1	7.74	0.1	0.1	0.2	0.1	21.67	7.8	3.2	4.7
9.67	0	35.22	0	0.1	13.56	2.1	0.1	0.1	0.1	0.1	0.1	0.1	22.01	0.1	0.1	2.9
10.1	0.1	8.54	0.1	0.1	13.54	1.3	0.8	0.4	0.3	0.2	0.2	0.1	0.1	0.1	0.1	0.6
1.3	2.9	0.1	0	11.83	14.07	0.1	1.9	0.4	0.1	0.1	3.3	0.1	1	0.6	0.1	0.9
0.9	0.1	0.1	0	15.02	45.6	0.1	0.1	0.1	0	0	2	0.6	0.2	0.1	0.1	0.3
0.5	6	0.1	0	95.23	13.1	0.1	0.1	0.1	0.1	0.1	0.1	0.1	0.1	0.1	0.1	0.1
0.1	15.67	0.1	0	32.15	0.42	4.85	0.1	1.3	6	5.72	0.1	6.3	0.1	0.5	1.3	0.6
0.1	20.4	7.03	0.1	8.9	0.1	0.3	0.1	0.1	0	0	0.1	1.7	5.2	6	0.1	8.71
0.1	8.29	10.85	0	0.3	4	0.1	0.1	28.05	0	0	1.4	0.1	0.2	4.1	0.1	3.5
0.1	0.1	14.87	0.1	1.4	12.8	0.1	0.1	18.54	0.3	0.3	2.2	0.1	7.6	4.2	0.2	0.1
0.1	0.1	36.22	2.4	2.5	7.13	0.1	0.15	7.3	6.41	6.01	2.2	0.4	34.1	4.5	1.2	0.1
0.1	0.1	14.8	0	3.8	8	0	0.1	11.98	0	0	0.1	3.6	65.89	4.4	0.5	0.1
0.2	0.1	2.7	0	5.21	2.5	0.1	0.1	12.27	0	0	0.1	0.1	77.3	3.88	13.9	0.1
4.8	0.1	0.1	0	2.4	0.1	0	0.1	4.7	0.1	0.1	2.4	0.7	62.14	0.1	2.8	0.1
0.1	0.4	0	0.1	14.84	0.1	0.1	0.1	2.5	7.5	7.3	1.41	0.8	17.56	0	10.88	0.1
0.1	0.1	0.1	0.1	0.1	2.5	0	0.1	4.7	3.5	3.1	1.3	0.1	0.84	0	0.1	0.1
0.3	0	1.3	0	0.1	0.1	0	0	3.4	0	0	7.25	0.1	0.1	0.9	0.1	0.3
0.1	0	3.2	0	0	0.1	0	0.1	0.1	0	0	0.1	0.1	0.1	0.1	0.1	0.1
0.1	0.2	0	0.1	0	0.1	0	0.1	0	11.42	12.22	0.1	0.6	1.3	0	0.2	0.1
0.1	0.1	0	0	0.1	0.1	0	0.4	0.1	0	0	4.7	0.1	0.5	0	0.7	1.3
0.1	0.1	0.1	0	0.1	0.5	0	8.94	0	0.1	0.1	2.3	0.5	0.9	4.73	0.1	13.42
5.7	0	0.9	0	0.1	0.1	0	2	0	0	0	1.5	0.1	0.1	9.2	0.2	8.6
9.6	0	9.7	0	0	9.4	0	0.1	0.1	0	0	0.1	0	7.43	1.2	0.4	0.1
25.32	0.1	0.1	0	0.1	0.6	0	0.1	5.4	0	0	0.1	0.2	23.98	0.1	40.01	0
30.98	0.1	0	0	4.9	0.1	0.1	0.1	0.1	0	0	0.1	9.15	15.06	0	9.12	0
3.46	0.1	0	0	10.21	0.1	0.1	4.6	0	0	0	2.6	2.7	10.54	0.1	1.4	0.1
4.2	0	0.1	0	0.1	0.6	0	8.2	0	0	0	1.1	1.6	11.95	3.1	0.1	3.2
0.5	0.1	0.1	0	0.1	1.4	0	13.48	0.1	0	0	0.8	0.1	15.89	0.1	5.7	10.2
0.1	0	0	0	0.1	0.3	0	16.23	0	0	0	8	0.1	12.92	0.1	2.09	19.98
0.8	0	0	0	0.1	0.5	0	24.21	0	0	0	9.4	0.1	5.3	1.9	5.6	21.25
3.9	0	0	0	0	0.21	0	50.09	0.1	0	0	4	0.1	0.1	0.9	1.9	10.7
0.1	0	0	0	0	1.6	0	45.02	0	0	0	3.4	0.1	1.6	0.1	0.1	6.2
0.1	0	0	0	0	0.1	0.1	19.66	0	0	0	30.06	0.1	2.08	0.6	0.1	1.8
0.2	0.1	0.1	0	0.1	2.9	0.1	7.37	0.1	0	0	1.8	0	0.1	0.82	0.1	0.1
0.1	0.1	2.5	0	0.1	1.4	0	9.7	0.1	0	0	2.3	0.1	0.9	0.1	0.1	0.5
1.22	0	0.1	0	0	2.4	0	10.2	0.1	0	0	0.1	0.4	0.6	0.1	0.1	2.1
0.4	0	0	0	0	0.1	0	13.9	0	0	0	0.1	7.04	0.5	0	0.5	5
1.5	0	0	0	1	0.2	0	7	0	0	0	0.1	7	4.4	0	11.11	1.9
1.2	0.1	0.1	0.1	0.1	0.1	0	2.2	0.4	0.1	0.1	0	0.1	3.08	0.2	12.47	5.2
1.3	0.1	7.94	0.1	0.1	1.2	0	4.3	0.4	0	0	0	1	0.73	0.1	7.2	1.7
2.3	0.1	0.1	0	0	0.1	0	3.6	0.5	0	0	0	0.1	4.8	0	15.81	2.6
0.4	0	0	0	0.1	0.1	0	0.1	0.1	0	0	0.1	0.1	0.7	0.1	1.3	1.4
1.9	0	0.1	0	0.1	0.1	0	3.28	0.1	0	0	0.1	0.2	0.1	0	0.1	0.1
0.4	0	0	0	0	0.1	0	3.9	0.1	0	0	0.1	0.1	0.1	0.1	0.1	0.4
0.7	0	0	0	0	0	0	8.5	0	0	0	0.1	0.7	0.1	0.1	0.1	1.6
0.2	0.1	0	0	0	0	0	0.86	0	0	0	0.1	0.1	0.1	0.1	0.1	3.4
1	0	0	0	0	0	0	0.3	0	0	0	0.1	0.1	0	0.1	0.1	0.2
0.1	0	0	0	0	0	0	0.1	0	0	0	0.1	0	0.1	0.1	0.1	0.3
0.1	0.1	0	0	0	0	0	0	0	0	0	0	0	0	0.1	0.1	0.3
0.4	0.1	0	0	0	0	0	0	0	0	0	0	0	0.1	0	0.1	0.1
0.7	0.1	0.1	0	0	0	0	0	0	0.1	0.1	0.1	0	0.1	0.1	0.1	0
0.2	0.1	0	0	0	0.1	0	0	0	0	0	0.5	0.1	0	0	0.1	0
0.1	0.1	0	0	0	0	0	0	0	0	0	0.1	0	0	0.1	0.1	0
0	0	0	0	0	0	0	0	0	0	0	0	0	0	0	0	0
0.1	0.1	0	0	0	0	0	0	0	0.1	0.1	0	0	0	0	0	0
0.1	0.1	0	0.1	0.1	0	0	1	0	0	0	0	0	0	0	0	0
0.1	0.1	0	8.3	0	0	0	45.33	0	12.98	14.56	6	0.1	0	0.1	0	11.3
0.1	0.1	0	0	0	0	0	26	0	0	0	0.2	0	0	0	0	1.8
0.1	0.1	0	0	0	0	0	0.8	0	0	0	0	0	0	0	0	0
0	0	0	0	0	0	0	0.1	0	0	0	0	0	0	0	0.1	0
0	0	0	0	0	0	0	0	0	0	0	0	0.1	0	0	0	0
0	0	0	0	0	0	0	0	0	0	0	0	0	0	0	0	0
0.1	0	0	0	0	0	0	0	0	0	0	0	0	0	0	0	0
0.1	0	0	0	0	0	0	0	0	0	0	0	0	0	0	0	0
0	0	0	0	0	0	0	0	0	0	0	0	0	0	0	0	0
1.4	0	0	0	0	0	0	0	0	0	0	0	0	0.1	0	0.1	0
3.33	0	0	0	0	0	0	0	0	0	0	0	0	0.1	0	0.1	0
1.3	0	0	0	0	0	0	0	0	0	0	0	0	0	0	0.1	0
0.1	0	0	0	0	0	0	0	0	0	0	0	0	0	0	0	0
0	0	0	0	0	0	0	0	0	0.1	0.1	0	0	0	0	0	0
0.1	0	0	0	0	0	0	0	0	0	0	0	0	0	0	0	0
0	0	0	0	0	0	0	0	0	0	0	0	0	0	0	0	0
0	0	0	0	0	0	0	0	0	0	0	0.1	0	0	0	0	0
0	0	0	0	0	0	0	0	0	0	0	0.1	0	0	0	0	0
0	0.1	0	0	0	0	0	0	0	0.1	0.1	0.1	0	0	0	0	0
0	0.1	0	0	0	0	0	0	0	0.1	0.1	0.9	0	0	0.1	0	0
0	0	0	0	0	0	0	0.1	0	0	0	0.1	0	0	0	0	0
0	0	0	0	0	0	0	2.3	0	0	0	0.1	0	0	0.1	0	0
0	0	0	0.1	0	0	0.1	0.1	0	0	0	0	0.1	0	0	0.1	0.1
0	0	0	0.1	0	0	0.1	0	0	0.1	0.1	0	0.1	0.1	0	0	0
0	0.1	0	0.1	0	0.1	0	0	0	0	0	0	0.1	0.1	0	0.1	0
0	0.1	0	0.1	0	0	0	0	0	0.1	0.1	0	0.1	0.1	0	0.1	0
0.1	0.1	0	0	0.1	0	0	0	0	0	0	0	0	0	0	0	0
0.1	0.1	0	0.1	0.1	0	0	0	0	0.1	0.1	0	0	0	0	0	0
0	0.1	0	0	0.1	0	0	0	0	0	0	0	0.1	0	0	0.1	0
0	1.6	0	0.1	0.1	0	0	0	0	0	0	0	0.1	0	0	0.1	0
0	0.1	0	0	0.1	0.1	0	0	2.1	0	0	0	0.1	0	0	0.1	0
0	0	0	0	0	0.1	0	0	0.1	0	0	0.1	0.1	0.1	0	0	0
0	0.1	0	0	0.1	0	0.1	0	0	0	0	0	0	0.1	0	0.1	0
0.1	0.1	0	0	0	0.1	0.1	0	0	0	0	0	0.1	0	0	0.1	0
0.1	1.7	0.4	0	0.1	0.1	0	0	8.17	0	0	0.1	0.1	0.1	0	0.1	0
0.1	0	4.9	0	0.1	0.1	0	0	0.1	0	0	0	0.1	0.1	0.1	0.1	0.1
0.1	0	0	0	0	0	0	0.1	0	0	0	0.1	0.1	0.1	0.4	0.1	5.2
0	0	0	0	0	0	0.1	0	0	0	0	0	0.1	0	0	0.1	0
0	0.1	0	0	2.39	0	0.1	0	0	0	0	0	0.1	0	0	0	0
0.1	0.1	0	0	0.1	0.1	0	0	0.1	0	0	0	0.1	0	0	0.1	0
0	0	0	0	0	0	0	0	0	0	0	0	0.1	0	0	0.1	0
0	0	0	0	0	0	0	0	0	0	0	0	0.1	0	0	0	0
0	0	0	0	0	0	0	0	0	0	0	0	0	0	0	0	0
0	0	0	0	0	0	0	0	0	0	0	0	0	0	0	0	0
0	0	0	0	0	0	0	0	0	0	0	0	0	0	0	0	0
0	0	0	0	0	0	0	0	0	0	0	0	0	0	0	0	0
0	0	0	0.1	0	0	0	0	0	0.1	0.1	0	0	0	0	0	0
0	0	0.1	0	0	0	0	0	0.1	0	0	0	0	0	0	0	0
0	0	0	0	0	0.1	0	0	0.1	0	0	0	0	0	0	0	0
0	0	0	0	0	0	0	0.1	0	0	0	0	0	0	0	0	0.1
0	0	0	0	0	0	0	0	0	0	0	0	0	0	0	0	0
0	0	0	0	0	0	0	0	0	0.1	0.1	0	0	0	0	0	0
0	0	0	0.1	0	0	0	0	0	0.1	0.1	0	0	0	0	0	0
0	0	0	0	0	0	0	0	0	0	0	0	0	0	0	0	0
0	0	0	0	0	0	0	0	0	0	0	0	0	0	0	0	0
0	0	0	0	0	0	0	0	0	0	0	0	0	0	0	0	0
0	0	0	0	0	0	0	0	0	0	0	0	0	0	0	0	0
0	0	0	0	0	0	0	0	0	0	0	0	0	0	0	0	0
0	0	0	0	0	0	0	0	0	0	0	0	0	0	0	0	0
0	0	0	0	0	0	0	0	0	0	0	0	0	0	0	0	0
0	0	0	0	0	0	0	0	0	0	0	0	0	0	0	0	0
0	0	0	0	0	0	0	0	0	0	0	0	0	0	0	0	0
0	0	0	0	0	0	0	0	0	0	0	0	0	0	0	0	0
0	0	0	0	0	0	0	0	0	0	0	0	0	0	0	0	0
0	0	0	0	0	0	0	0	0	0	0	0	0	0	0	0	0
0	0	0	0	0	0	0	0	0	0	0	0	0	0	0	0	0
0	0	0	0	0	0	0	0	0	0	0	0	0	0	0	0	0
0	0	0	0	0	0	0	0	0	0	0	0	0	0	0	0	0
0	0	0	0	0	0	0	0	0	0	0	0	0	0	0	0	0
0	0.3	0	2.2	0.4	0	0	0	0.1	0.1	0.1	0	0.1	0	0	0	0.1
0	0	1.3	0	0.1	0.1	0	0	2.8	0	0	0.1	0	0.1	1.3	0.1	0
0	0	0	0	0	0	0	0.1	0	0	0	0.1	0	0.1	0.1	0	0.1
0	0	0	0	0	0	0	0.1	0	0	0	0	0	0	0	0	0
0	0	0	0	0	0	0	0	0	0	0	0	0.1	0	0	0.1	0
0	0	0	0	0	0	0	0	0	0	0	0	0.1	0	0	0.1	0
0	0	0	0	0	0	0.1	0	0	0	0	0	0.1	0	0	0	0
0	0	0	0	0	0	0	0	0	0	0	0	0	0	0	0	0
0	0	0	0	0	0	0	0	0	0	0	0	0	0	0	0	0
0	0	0	0	0	0	0	0	0	0	0	0	0	0	0	0	0
0	0	0	0	0	0	0	0	0	0	0	0	0	0	0	0	0
0	0	0	0	0	0	0	0	0	0	0	0	0.1	0	0	0.1	0
0.1	1	0	14.1	0.4	0	0	0	0	11.86	12.76	0	0.1	0	0	0.1	0
0.1	0.1	0	0	4.6	0	0	0	2.1	0.1	0.1	0	1.6	0	0	0.1	0
0	0.1	0.1	0.1	2.9	0.1	0	0	13.66	2.8	2.3	0	0.1	0	0	0.1	0
0	0	0.1	0	0.1	0	0	0	0.1	0	0	0	1.1	0	0.1	0.1	0
0	0.3	0	0	7	0	0	0	2.1	0	0	0	0.7	0	0	0.1	0
0.1	6.2	0.1	24.52	2.8	0.1	0	0	7.49	0.2	0.2	0	0.9	0.1	0	0.1	0
0.4	0	14.01	9.6	0	4.2	0	0	0.1	0.1	0.1	0	0.1	0.8	0.1	0.1	0
0.1	0	1	0	0	0	0	0	0	0	0	0	0	0.8	0	0.1	0.1
0	0	0	0	0	0	0	0	0	0	0	0.1	0	0.1	0	0.1	0.1
0	0	0	0	0	0	0	0	0	0	0	0	0	0.1	0	0	0
0	0	0	0	0	0	0	0	0	0	0	0	0	0	0	0	0
0	0	0	0	0	0	0	0	0	0	0	0	0	0	0	0	0
0	0	0	0	0	0	0	0	0	0.1	0.1	0	0	0	0	0	0
0	0	0	0.1	0	0	0	0	0	0.1	0.1	0	0	0	0	0	0
0	0	0	0.1	0	0	0	0	0	0.1	0.1	0	0	0	0	0	0
0	0	0	0.1	0	0	0	0	0	0.1	0.1	0	0	0	0	0	0
0	0.1	0	2.75	0	0	0	0	0	6.4	6	0	0	0	0	0	0
0	0.1	0	23.59	0	0	0	0	0	6.35	6	0	0	0	0	0	0
0	0.1	0	12.4	0.1	0	0	0	3.4	9.1	9.43	0	0	0	0	0	0
0	0	0	0	0	0.1	0	0	0.1	0	0	0	0	0	0	0	0
0	0	0.1	0	0	0.1	0	0.1	0	0	0	0	0	0	0	0	0.1
0	0	0	0	0	0	0	0	0	0	0	0	0	0	0	0	0
0	0	0	0	0	0	0	0.1	0	0	0	0	0	0	0	0	0
0	0	0	0	0	0	0	0	0	0	0	0	0	0	0	0	0
0	0	0	0	0	0	0	0	0	0	0	0	0	0	0	0	0
0	0	0	0.1	0	0	0	0	0	0.1	0.1	0	0	0	0	0	0
0	0.1	0	0	0	0	0	0	0.1	0	0	0	0	0	0	0	0
0	0	0	0.1	0	0	0	0	0.1	0	0	0	0	0	0	0	0
0	0.1	0.1	0.5	0	0	0	0	0.1	0.1	0.1	0	0	0	0	0	0
0	0.1	0.1	13.57	0	0	0	0	1	15.1	17.25	0	0	0	0	0	0
0	0	0.1	0	0	0.1	0	0	0.1	0.1	0.1	0	0	0	0	0	0
0	0.1	0	0	0.1	0.1	0	0	0	0	0	0	0	0	0	0	0
0	0	0	0	0.1	0.1	0	0	0	0	0	0	0	0	0	0	0.1
0.1	0	0	0	0	0.1	0	0	0	0	0	0	0.1	0	0	0	0
0	0.1	0	0	0.1	0	0	0	0	0	0	0	0.1	0.1	0	0	0
0	0.1	0	0.1	0.1	0	0	0	0.1	0.1	0.1	0	0	0	0	0	0
0	0.1	0	0.2	0.1	0	0	0	0.1	0.1	0.1	0	0	0	0	0	0
0	0	0	0.2	0.1	0	0	0	0	0.3	0.2	0	0	0	0	0	0
0	0.1	0	0.7	0.1	0	0	0	0	0.9	0.7	0	0	0	0	0	0
0	0.1	0	0.1	0.1	0.2	0	0	0.1	0.1	0.1	0	0	0	0	0	0
0	0.1	1.4	0.4	0.1	0.1	0	0	2.36	0.2	0.2	0	0.1	0	0	0	0
0	0	0.1	0	0	0.1	0	0.1	0.1	0	0	0.5	0	0.1	0.1	0	1.46
0.1	0	0	0.1	0	0	0	0.1	0	0.1	0.1	0.1	0	0	0	0	0.1
0.1	0.1	0.1	4.2	0.1	0.1	0.1	0	0.1	3.4	3	0	0.1	0.1	0	0	0.1
0.1	0.1	5.3	13.66	0	0.1	0.1	6.5	0.1	0.8	0.6	0.6	0.1	0.1	2.3	0	4.2
0.1	0.1	0.1	0.2	0.1	0.4	0.1	28.87	0.1	6.8	6.54	0.8	0.1	0.1	8.9	0	55.38
0.1	0.1	5.92	0.1	0	0.1	0.1	70.08	1.4	0.1	0.1	3.9	0.1	0	12.7	0	16.09
0.1	0.1	0.1	5.95	0.1	0.1	0.1	4.8	0	11.41	12.21	0.1	0	0	0.1	0	0.1
0.1	0	0.1	0	0	0	0	0	0.1	0.1	0.1	0	0.1	0	0	0.1	0.1
0	0	0	0	0	0	0	5.9	0	0	0	0.1	0	0	0	0	0
0	0.1	0	0.1	0.1	0.1	0.1	0	0.1	0.3	0.3	0	0.1	0	0	0	0
0.1	0.6	0.87	0.5	0.1	0.1	0.1	0.1	0.1	0.8	0.6	0	0	0	0.1	0	0.1
0.1	0.1	6.6	0.6	0.1	0.21	0.1	0.2	0.1	0.3	0.2	0.1	0	0.1	3.3	0.1	2.7
0.1	0	0.7	0.1	0	0.1	0	22.9	0.1	0.1	0.1	0.4	0	0	1.6	0	8.09
0.1	0	1.4	0.1	0	0.1	0	5	0.1	0.1	0.1	0.5	0	0	0.1	0	8.6
0	0	0.1	0	0	0.1	0	35.91	0	0	0	11.44	0	0	0.2	0	14.67
0	0	0	0.1	0	0	0	0	0	3	2.4	0	0	0	0	0	0
0	0.1	2.5	0.12	0	0	0	0	0.1	6.6	6.4	0.1	0	0	0.1	0	0
0	0	0	0.1	0	0	0	1.9	0	0.1	0.1	0.2	0	0	0.6	0	0.1
0	0	0	0	0	0	0	10.4	0	0	0	0.9	0	0	0.1	0	0
0	0	0	0	0	0	0	0.1	0	0	0	0.4	0	0	0	0	0
0	0	0	0.1	0	0	0	0	0	0.1	0.1	0	0	0	0	0	0
0	0	0	0	0	0	0	0	0	0.1	0.1	0	0	0	0	0	0
0.1	0	0.1	0	0	0	0	0	0	0	0	0.1	0	0	0.1	0	0
0.1	0	0	0	0	0	0	0	0	0	0	0	0	0	0	0	0
0.1	0	0	0	0	0	0	0	0	0	0	0	0	0	0	0	0
0	0	0	0	0	0	0	0	0	0	0	0	0	0	0	0	0
0	0	0	0	0	0	0	0	0	0	0	0	0	0	0	0	0
0	0	0	0	0	0	0	0	0	0	0	0	0	0	0	0	0
0.1	0	0	0.1	0	0	0	0	0	0.1	0.1	0	0	0	0	0.1	0
0.1	0.1	0.1	0	0	0.1	0	0	0.1	0.1	0.1	0	0	0	0	0.1	0
0	0	0	0	0	0	0	0.1	0	0	0	0.2	0	0	0	0	0.1
0.1	0	0	0	0	0	0	3.6	0	0	0	0.1	0	0.1	0	0.1	0.8
0.1	0	0	0	0	0	0	4.7	0	0	0	0.5	0	0.1	0	0.1	0
0.1	0	0	0	0	0	0	0.2	0	0	0	0	0.1	0.1	0	0.1	0
0.1	0	0	0	0	0	0	0.1	0	0	0	0	0	0	0	0.1	0
0.1	0	0	0	0	0	0	0	0	0.1	0.1	0.1	0	0	0	0.1	0
0.1	0.1	0	0	0	0	0	0	0	0.1	0.1	0.1	0	0	0	0	0
1	0.1	0	1.5	0.1	0.1	0	0	0	0.6	0.5	0.1	0.1	0.1	0.1	0.1	0
0.1	0.1	0	0.1	0.1	0	0	0	0	0.1	0.1	0	0.1	1	0	0.9	0
0.1	0.1	0.1	0	0.1	0.1	0	0	0	0	0	0	0.1	0.1	0	0.11	0
0.1	0	0.1	0	0	0.1	0	0	0	0	0	0.1	0	0.1	0.1	0.1	0.1
0.1	0.1	0	0.1	0	0	0	2.1	0	0.1	0.1	1.6	0	0	0	0.1	0
0.1	0	0	0.1	0	0	0	0	0	0	0	2.2	0	0	0	0.1	0
0.1	0	0	0.1	0	0	0	0	0	0	0	0.1	0.1	0	0	0.1	0
0.1	0.1	0	0	0.1	0.1	0	0	0.1	0	0	0.1	0	0.1	0	0.1	0
0.1	0	0.6	0	0.1	0.1	0	0	0.1	0	0	0	0.1	0.1	0.1	0.1	0
0.1	0.1	0	0.1	0	0.1	0	0.1	0	0.1	0.1	0.1	0.1	1.8	0.1	0	2.1
0.1	0.1	0	0.1	0.7	0.1	0	5.4	0	0	0	0.1	0.1	5.6	0	0.1	0
0.1	2.3	0	13.47	3	0.1	0	0.1	0.1	0.1	0.1	0	0	0.4	0	0.1	0.1
0.1	0.2	3	0.6	0.1	0.1	0	4.9	0.1	0	0	0	0	0.1	0.1	0	2.7
0	0.1	0	0	2.8	0.1	0	10.38	0.1	0	0	7.23	0	0.1	0	0	0.1
0	0.1	0.1	0.1	0.1	0.6	0.1	9.87	0.9	0.1	0.1	17.43	0.1	0.1	0.1	0	1.9
0	0.1	0	1.8	0.1	0.1	0	24.69	0	0.1	0.1	17.98	0.1	0.1	0.1	0	0.1
0	0.1	0.1	4.7	0.1	0.1	0	4.4	0.1	0.1	0.1	0.4	0	0.1	2.3	0	3.9
0	0.1	0.3	0.4	0.1	0.1	0	12.44	0	0.5	0.4	2.16	0	0.1	0.8	0	0.1
0	0.1	0	0.1	0.1	0.2	0.1	10	0.1	0.1	0.1	24.77	0.1	0.3	0.9	0	1.9
0	0.1	0	0.4	0.1	0.4	0	7	0.1	0.1	0.1	47.38	0	1.1	1.2	0	2.7
0	0.1	2	0.1	0	0.1	0	17.7	0.1	0.1	0.1	36.15	0	0.1	1.7	0	7.37
0	0	0	0	0	0	0.1	13.87	0.1	0.1	0.1	7.3	0	0	0.1	0	2.7
0	0.1	0	0	0	0	0	5.7	0	0	0	6.5	0	0	0	0	0.2
0	0.1	0	0.1	0	0.1	0.1	0	0	0.1	0.1	0.7	0	0	0	0	0.1
0.1	0.1	0.1	5.3	0	0.1	0.1	0.8	0.1	0.1	0.1	0.8	0	0.1	0.1	0	0.1
0.1	0.1	0.1	0	0.1	0.1	0	0.1	0	0	0	3	0	0.1	0	0.1	0.2
0.1	0.1	0	0	0	0	0.1	0	0	0	0	0.1	0	0.1	0	0	0
0.1	0.1	0	0.1	0.1	0.1	0	0	0	0	0	0.1	0	0.1	0	0	0
0.1	0	0	0	0	0.1	0.1	0.1	0.1	0	0	2.8	0.1	0.1	0	0.1	0
0.1	0.1	0	0.1	2.4	0.1	0	0.1	0.1	0.1	0.1	20.09	0	0.8	0.1	0.1	0.1
1.7	0.1	0	7.9	0.1	0.1	0	1.1	0.1	0.1	0.1	16.4	0.1	0.9	0	0.1	0
0.1	0.1	0	0	0.1	0.1	0	0	0	0	0	0.1	1	1.9	0	0.2	0.4
0.1	0	0	0	0	0.1	0	0.1	0	0	0	0.1	0.1	1.5	0	0.1	0.35
0.2	0	0	0	0	0.1	0	2.8	0	0	0	0.7	0	0.1	0	0.1	0.1
2.8	0	0	0	0	0.1	0	0	0	0	0	14.57	0.1	0.1	0	0.1	0.1
0.6	0	0	0	0.1	0.1	0	0.1	0	0	0	36.22	1	4	0.1	0.2	0.8
0.1	0	0	0	2.8	0	0	1.6	0	0.1	0.1	35.7	9.63	2.5	0	0.1	0.4
0.1	0.1	0	0.1	9.29	2	0	0.1	0.1	0.1	0.1	0.1	2.2	0.1	0.1	0.1	0
0.1	0.1	0.1	0.1	0.1	0.1	0.1	1.4	0.1	0.1	0.1	0.1	0.1	0	0	0.1	0.1
0.1	0.1	0	0.1	0.2	0.1	0	0.1	0.1	0.1	0.1	0.1	0.1	0.1	0	0	0.1
0.1	0.1	0	0	0	0.1	0.1	0.1	0.1	0	0	0.1	0	0.1	0	0	0.1
0.1	0.1	0	0	0	0.1	0.1	0	0	0	0	0	0	0.1	0	0	0.1
0	0.1	0	0	0.1	0.1	0	0	0	0	0	0.1	0	0.1	0	0	0
0	0.1	0	0	0.1	0.1	0	0	0	0	0	0.1	0	0.1	0	0	0
0	0.1	0	0	0	0.1	0	0	0	0	0	0.1	0	0.8	0	0	0
0.1	0	0	0	0.1	0.1	0.1	0	0	0	0	0.53	0	0.1	0	0.1	0
0.1	0	0	0.3	0	0.1	0	0	0	0	0	3.7	0	0.1	0	0	0
0.1	0.1	0	0.6	0	0.1	0	0	0	0.1	0.1	0.2	0	0.1	0	0	0.1
0.1	0.1	0	0.1	0	0	0	0	0	0	0	2.1	0	0.1	0	0	0
0.1	0.1	0	0.1	0	0.1	0	0	0	0	0	9.31	0	0.1	0	0.1	0.1
0.1	0	0	0	0	0	0	0	0	0	0	11.8	0	0	0	0	0
0.1	0	0	0	0	0	0	0	0	0	0	0.1	0	0	0	0	0
0.1	0	0	0	0	0	0	0	0	0	0	0.1	0	0	0	0	0
0.1	0	0	0	0	0	0	0.1	0	0	0	3.1	0	0	0	0	0
0.1	0	0	0	0	0	0	5.2	0	0	0	6.2	0	0	0.1	0	0
0	0	0	0.1	0	0	0	20.08	0	0.1	0.1	0.1	0	0.1	0.1	0	0.1
0.1	0	0	0.1	0	0.1	0	2.7	0	0.2	0.2	2	0	0.1	0	0	0.2
3.9	0	0	0	0	0.1	0	0.1	0.1	0	0	7.94	0	0.1	0.1	0.1	0.1
52.76	0.1	0	0	0	0.3	0	0.8	0.1	0	0	5.7	0	0.1	0.1	1.9	0.1
105.57	0.9	0.5	0	0.6	0.78	0	3.4	1.5	0	0	3.53	1.1	101.46	0.1	22.2	0.4
10.46	0.1	9.91	0.1	0.4	2.6	0	0.7	4.7	0	0	2.4	6.7	64.09	1.2	10.5	1.3
0.9	0	5.8	0.3	15.62	43.78	0.1	0	4.9	0	0	0	0.1	0.1	0.1	6.55	0.1
0.1	0.1	5.2	0.1	0.1	5.8	0.1	0	0.1	0.1	0.1	0.1	0.1	0.1	0.6	0.1	3.4
0.1	0	0	0.1	0	1.5	0.1	4.4	0.1	0.1	0.1	29.72	0.1	0.1	0.1	0.1	0.1
0.1	0	0	0	0	0	0.1	1.4	0	0.1	0.1	10.2	0.1	0	0.1	0.1	0.2
0.2	0.1	0	0.1	0	0	2.1	0.1	0	0	0	6.47	0.1	0	0	0.1	0.1
1	0	0	0.1	0	0	0.1	0.1	0.1	0.1	0.1	3.4	0	0	0	0.1	0
0.1	0	0	0	0	0.1	0.1	0	0	0.1	0.1	8.47	0	0.8	0	0.1	0
0.5	0	0	0	0	0.1	0.1	0	0	0	0	7.6	0.1	10.19	0	0.1	0
2.6	0.1	0	0	0	0.1	0.1	0	0	0	0	15.61	0.1	11	0	0.74	0
3.8	0	0	0	0	0.1	0.1	0.1	0	0	0	9	0.1	4.9	0	3.4	0
2	0	0	0	0	0	0.1	0.2	0	0	0	3.6	0.1	0.1	0.1	0.1	0
0.1	0	0	0	0	0	0.1	9.8	0	0	0	2.4	0.1	0	6.1	0.1	0.4
0.1	0	0.1	0	0	0.5	0.1	1.7	0	0.1	0.1	22.34	0.1	0.1	19	0.1	0.6
0.1	0	4.5	0	0	1.8	0.1	0.1	0	0.1	0.1	2.8	0.1	0.1	2.3	0.1	3
0.1	0.1	5	0.1	0.1	1.75	0.1	5.6	0.1	0.1	0.1	0.1	0.1	0.1	0.1	0.1	17.16
0.3	0.1	0.3	0.1	2.4	0.1	0.1	14.83	0.4	0	0	0.1	0.6	17.51	0.1	0.1	43.98
0.6	0.1	14.86	0	2.11	18.3	0.1	27.31	1.2	0	0	24.48	0.1	1.5	5.2	0.1	33.83
0.2	0.8	70.26	0	0.1	38.74	0.1	26	6.9	0.1	0.1	39.61	1.9	0.1	6.39	0.7	4.2
0.4	0.1	140.71	0	0.1	23.7	7.1	5.5	1.8	0.1	0.1	18.1	0.1	0.1	30	0.2	6.48
0.9	0.1	21.21	0	0.1	8.87	0.1	80.92	0.1	0.1	0.1	34.66	3.1	0.1	48.2	5.9	24.2
1.4	0.1	0	1.22	0.1	0	12.5	75.55	0	0.2	0.2	39.31	0.3	0.1	12.66	2.7	7.29
3.56	0.1	0	40.86	0.6	0.1	8.92	27.22	0	30.02	34.46	93.32	1.5	0.1	11.95	10.18	1
25.58	0.1	0.1	18.69	0.1	0.1	3.6	0.1	0.4	2.9	2.36	83.05	0.6	0.1	6.37	0.44	0.1
18.71	0.1	0.1	0	0.1	5.2	2.1	12.22	0.1	2.7	2.2	45.2	0.5	0.9	5.6	4.5	0.9
11.32	0	0.1	0	0	0.1	1.2	5.36	0.1	0	0	30.78	0.1	0.1	6.7	0.1	2.1
18.55	0	0.1	0	0	0	2	0.4	0.1	0	0	45.1	0.1	0.1	0.1	0.1	2.7
1.9	0	0.4	0	0.1	0.1	0.8	0.3	0.1	0	0	32.81	0.1	0.1	7.6	0.1	0.1
4.45	0	19.39	0	0	0.1	0.7	0.7	0	0	0	5	0.1	4.2	31.77	0.1	7.5
8	0	35.35	0	0.1	20.48	0.1	4.44	4.7	0.1	0.1	2.8	0.2	5.6	0.1	0.1	22
16.61	0.2	0.1	0	35.56	63	0.7	7.53	3.7	0.1	0.1	0.5	7.7	22.89	3.9	8.1	5.6
7.8	1.5	1.8	0.1	47.36	9.74	20.84	6.7	0.1	7.5	7.3	14.52	24.23	0.2	13	0.3	7.6
1.3	17.61	0.1	0.2	35.72	2.6	86.26	11.77	0.1	0.1	0.1	7.1	4.6	0.1	4.9	0.1	0.3
0.1	36.87	19.86	1.5	0.1	7.34	33.7	10.45	18.69	8.01	7.9	8.3	0.3	0.1	6.4	0.1	0.3
0.1	17.91	66.03	45.92	0.1	2.1	3.2	20.32	28.36	41.11	47.14	20	0.8	0.1	2	0.1	11.76
0.1	1.8	143.94	0.1	0.1	0.4	0.1	18.39	26.3	0.1	0.1	45.1	1.1	0.1	27.37	0.1	16.65
0.1	0	79.54	0	0.1	2.2	0.1	9.5	0.1	0	0	35.38	5.44	1.6	52.12	4.6	15.47
0.1	0.1	5.88	0	0.1	8.98	0.1	15.45	0.1	0	0	21.3	1.4	0.2	39.45	0.1	11.44
0.1	0.1	6.9	0	0.4	0.7	0.4	26.33	0.1	0	0	2	0.9	9.8	22.71	0.1	13.19
0.1	0.1	13.63	0	0.1	6	0.1	30.7	0.1	0.1	0.1	2.9	0.1	1.2	13.8	17.93	34.02
0.1	0.1	26.4	0	0.1	22.42	0.5	5.5	18.8	0	0	1.82	0.1	0.8	2.4	7.28	21.21
0.1	0.1	0.1	0	0.1	56.4	0.3	10.57	33.66	0	0	0.1	0.1	0.1	0.1	1.3	7.9
0.4	0.1	0.1	0	0.2	22.57	0.1	14	3	0.1	0.1	7.6	0.1	0.1	6.1	0.1	12.46
2	0	0.1	2.3	0.1	13.1	0.5	21.39	2.7	0.4	0.3	1.7	0.1	0.1	6.84	0.1	20.66
2.8	0.1	0.1	0	0.1	60.96	0.1	2.8	1.6	0.1	0.1	0.1	0.1	1	1.1	0.1	14.46
1.8	0.4	0.4	1.3	2.05	58.73	0.1	7.2	0.1	5.3	4.9	0.1	1.9	13.59	0.1	0.1	8.97
2.5	3.5	1.4	0	14.58	31.48	4.61	0.3	0.3	0.1	0.1	0.1	5.7	10.85	0.1	0.1	3.4
5.5	2	0	0	8.9	15.44	2.1	3.2	0.4	1.3	1	0.1	3.6	4	0.1	0.1	6.5
0.8	9.11	0	0.1	0.3	8.73	2.05	18.3	0.1	0.1	0.1	0.1	0.1	0.7	0.1	1.9	10.6
1.2	0.1	0	0.1	0.2	5	0.54	6.3	3.5	0.1	0.1	0.2	0.1	1.8	0.9	3.2	8.7
3	2.9	0.1	0	0.1	9.4	1	3.3	2.1	0.1	0.1	0.1	0.1	21.94	0.1	0.1	3.4
5.6	0.1	0	0.1	3.3	10.4	0.5	0.3	4.25	0.1	0.1	0.3	30.88	71.94	0.1	0.2	7.97
9.6	0.8	0.1	0.1	11.27	2.52	0.1	0.2	0.1	0.1	0.1	0.1	4.34	8.1	0.1	15.88	2.4
24.32	6.9	0	0.1	2.3	3.4	0.1	0.6	0	0.1	0.1	0.1	32.19	38.18	0.1	21.48	2.6
32.47	0.1	0.1	0	35.01	15.88	19.3	0.1	0	0.1	0.1	0.1	107.45	24.14	0.1	11.6	0.2
29.15	0.1	0.1	0	8.9	9.82	199.89	0.3	0.1	0.1	0.1	0.1	13.74	1.2	0.1	13.4	0.1
25.49	0.1	0.1	0	23.31	11.41	22.2	0.1	0.1	8.01	7.9	0.2	6.1	1.1	0.1	18.1	0.4
1.6	2	0.1	0.1	20.55	26.4	81.67	0.1	0.1	1.7	1.3	0.1	9.2	4.9	0.1	3.1	0.1
0.1	6.9	0.3	0.1	21.89	21.52	39.99	0.1	0.1	10.4	11.24	0.1	10.81	5.4	0.1	1.1	0.1
0.1	3.7	0.4	0	32.13	2.3	54.02	2.8	4.3	0	0	6.7	2.8	1.12	4.4	0.1	0.8
0.1	19.84	7.03	0	3.9	0.78	0.1	26.81	0.1	0.1	0.1	17.32	6.8	0.5	15.94	2.2	1.8
0.1	0.1	15.1	0	0.1	4.1	0.2	39.15	0.1	0	0	18.32	0.4	60.62	27.12	2.8	10.62
0.4	0	11.4	0	0.1	19.08	0.2	29.82	11.08	0	0	8.02	0.1	17.26	4.8	1.4	21.58
0.1	0.1	3.1	0	6.3	7.93	0.1	14.8	0.1	0	0	6.3	2.3	63.85	5.6	0.1	12.5
0.4	3.4	0.1	0	10.24	22.06	1.37	29.14	0	0.1	0.1	7.3	11.81	139.61	4	3.45	22.01
8.7	0.1	1	0	3.2	46.07	3.7	2.5	0.1	0	0	14.72	0.9	22.75	9.15	3.42	13.9
24.26	7.5	9.45	0	1.6	18.1	3.1	3.4	4.9	0	0	0.9	0.1	38.06	1.1	0.7	0.1
3.91	23.57	1.5	0.1	9.6	0.2	0.1	0.8	0.1	0.1	0.1	0.1	0.4	4.8	0.1	0.9	1.1
2	0.2	0	0	1.8	0.1	0.1	0.1	0.1	0.1	0.1	0.1	0.8	3.67	0.1	0.1	0.1
2	0.1	0.1	0.31	0.1	0.1	0.1	0.1	0.1	0.1	0.1	16.16	0.6	0.9	0.5	1.8	1.2
4.1	0.1	12.11	0	0.1	5.4	0.2	0.1	13.5	0.1	0.1	1.1	2.8	0.3	8.9	16.79	19.74
2.9	0.9	7.88	0.3	5	2.1	3	0.1	12.67	9.6	10	2	4.1	1.2	0.9	2.4	0.1
6.39	2.3	0.8	0.1	1.8	4.62	3.2	0.1	3.53	6.6	6.33	8.7	14.34	8.23	0.7	50.65	1.5
30.62	5.6	0.1	0	12.7	5	8.32	0.9	2.8	0.9	0.7	1.3	10.1	23.46	0.8	27.47	5.42
2.4	14.69	0.1	0.1	31.61	35.78	8	2.1	0.1	0.1	0.1	0.7	12.91	3.4	1.7	11	13.26
3	2.3	0.1	0.3	17.37	47.74	0.1	12.4	0.1	1.5	1.2	6.4	31.54	1.8	2.1	9.2	14.48
5.7	2.7	0.8	0.1	9.99	31.95	1.3	21.13	0.1	0	0	16.99	25.1	16.12	4.8	19.3	21.13
5.3	2.1	9.43	0	5.4	55.58	1.4	5.55	5.1	0.1	0.1	0.3	1.1	3.6	2.9	3.2	7.09
0.3	0.1	0.7	0	4.3	43.4	1.5	7.4	5.37	0.1	0.1	3.9	0.18	8.29	0.5	0.1	6.8
4.5	0.2	0.1	0	8.46	24.21	3.69	5.5	0.1	0.1	0.1	1.1	0.26	0.1	0.1	0.1	13.86
8.82	0.8	0.1	0	1.1	23.16	4	2.6	0.1	0.1	0.1	3.3	0.89	1.4	2.2	0.1	8.9
8.7	4.9	0.5	0	0.1	22.64	1.1	2	8.6	0	0	3.59	1.1	0.4	3	0.1	5.47
16.78	0.1	4.7	0	12.69	18.5	0.1	0.2	3	0	0	0.9	1	0.1	4.57	5.41	3.4
2.9	14.85	9.1	0	24.86	4.7	0.1	3.7	8.3	0	0	2.1	0.6	0.5	2.2	8.1	3.2
2.2	16.46	9.1	0	21.45	1.4	0.1	0.1	1.6	0	0	1.3	32.47	6.4	10.67	11.6	2.7
3.5	7.35	5.6	0.1	12.68	0.5	0.1	0.1	4.7	0.1	0.1	0.1	6	1.41	2.69	22.59	0.1
12.35	2.9	0.1	5.8	1.4	4.06	0.1	0.1	2.8	12.08	13	0.1	9.25	22.1	0.1	4.4	0.1
11.26	12.76	0.1	13.16	6.63	6.12	0.1	0.3	0.1	18.16	20.6	8.5	11.4	0.1	1.7	6.93	0.6
1.4	15.42	5.1	4.29	21.85	14.88	0.1	3	1	0.1	0.1	13.44	7.8	0.5	5.48	0.4	0.8
0.8	1.8	37.49	1.7	16.76	18.1	0.5	7.05	14.93	0.1	0.1	38.82	0.8	0.1	19.1	0.1	2.2
0.1	0.1	38.63	0	0.1	9.7	0.1	4.1	11.42	0	0	98.19	0.1	0.1	50.14	0.1	2.8
0.1	0	39.02	0	0.1	0.1	0.1	32.56	0.1	0	0	83.21	0.1	0.1	5.3	0.1	43.87
0.1	0	2.2	0	0.1	0.1	0.3	41.78	0	0	0	48.3	0.1	0.1	1.8	0.1	2.2
0.3	0	0.1	0	0.1	0.1	1.7	31.77	0	0	0	2.71	0.1	0.1	27.39	0.1	3.9
0.6	0	0.1	0	0.1	0.1	1.6	17.7	0.1	0	0	0.1	0.1	0.1	5.1	0.1	0.6
0.1	0	1.9	0	0.1	0.1	0.1	2.74	0	0.1	0.1	0.1	0.1	0.1	0.8	0.1	1.5
0.1	0	0.1	0	0.1	0.1	0.1	8.7	0	0	0	22.17	0.1	0	9.61	0.1	0.9
0.1	0	0	0	0	0	0.1	2.05	0	0	0	31.09	0.1	0	0.1	0.1	0.4
0.1	0	0	0	0	0	1.1	13.5	0	0	0	21.31	0.1	0.1	0	0.1	0.1
0.1	0	0	0	0.1	0	0.1	0.1	0	0	0	6.79	0.1	0	0.9	0.1	0.1
0.1	0	0.1	0	0	0	0.1	3.95	0	0	0	0.1	0.1	0.1	15.72	0.1	2.1
0.1	0	0.9	0	0	0	0.1	9.76	0	0	0	0.1	0.1	0.1	0.1	0.1	13.9
0.1	0	0	0	0	0.1	0.1	14.28	0	0	0	0.1	0	0	0.4	0.1	10.4
0.1	0	1.2	0	0	0.1	0.1	20.74	0	0	0	0.1	0.1	0	0.1	0.1	2.1
0.1	0	0	0	0	0	0.1	3	0	0	0	0.1	0.1	0.1	0	0.1	0.7
0.1	0	0	0	0	0	0.9	3.4	0	4.5	4.18	0.1	0.1	0.1	0.1	0.1	0.1
0.1	0	0	0	0	0	0.1	0.1	0	0	0	1.6	0.1	0	0	0.1	0
0.1	0	0	0	0	0	0.1	0.1	0	0	0	1.8	0	0	0	0.1	0.3
0	0	0	0	0	0	0.1	0.1	0	0	0	0.1	0	0	0	0.1	0
0.1	0	0	0	0	0	0.1	0	0	0	0	0.1	0	0	0	0	0.1
0.1	0	0	0	0	0.1	0.1	0	0	0	0	1.4	0	0	0	0	0.1
0.1	0	0	0	0	0.1	0	0.1	0	0	0	10.4	0	0	0	0	0.1
0	0.1	0	0.6	0	0.1	0	1.3	0	0	0	7.99	0	0	0.1	0	0
0.1	0.1	0	1.1	0	0.1	0.1	11	0	0.1	0.1	5.4	0	0	4.9	0	0.1
0.1	0.1	0	0	0	0.1	0.1	16.64	0.1	0.1	0.1	6	0	0.1	8.5	0	0.4
0.1	0	0	4.5	0	0	0.1	13.56	0.1	6.85	6.8	0.1	0	0.1	0.1	0	0.6
0.1	0.1	0	14.13	0	0.1	0.1	3.4	0.1	8.01	7.9	0.1	0	0	0	0	0.5
0	0.1	0	0.1	0	0.1	0	5.9	0	0	0	0.1	0	0	0.1	0	0.1
0.1	0.1	0	0	0.1	0.1	0	13.48	0	0	0	2.8	0	0	1	0	6.2
0.1	0.1	0.1	0	0	0.1	0	9.7	0.1	0	0	1.2	0.1	0.1	11.93	0	24.2
0.1	0.1	5.5	0	0.1	0.1	0	0.9	0.1	0	0	0.1	0.1	0.1	0.2	0.1	21.96
0.1	0.1	2	0	0.1	1.6	0.1	10.3	0	0	0	0.1	0	0.1	6.35	0.1	54.21
0.1	0.1	0.1	0.5	0.1	0.1	0.1	8.22	0	0.1	0.1	0.3	0	0.1	10.8	0.1	60.54
0.1	0.1	0	2.71	0	0.1	0.1	36.04	0	1.6	1.2	5.69	0	0	1.8	0	12.76
0.1	0.1	0	0.1	0	0.1	0.1	23.19	0	0.1	0.1	0.5	0	0	8.42	0	8.9
0.1	0	0	0	0.1	0	0	6.5	0	0	0	0	0	0	0	0	1.8
0.1	0	0	0	0	0	0.1	3.8	0	0	0	0.1	0.1	0	0	0.1	0.1
20.54	0	0	0	0	0	0	0.5	0	0	0	1.8	0	3.8	0.1	7.2	0.1
146.12	0	0	0	0	0.1	0	0.7	0	0	0	0.8	0.1	29.27	1.7	23.16	0.1
44.73	0	0	0	0	0.1	0	3.98	0	0	0	0.1	1.7	0.2	2	12.55	0
1.2	0	0	0	0	0.1	0.1	2.8	0	0	0	2.4	0.6	2.3	0.2	0.1	0.1
0.1	0	0	0	0	0.1	0.1	2.6	0	0	0	2.4	0.49	0.1	0	0.1	0.1
0.1	0	0	0	0	0	0.1	0.1	0	0	0	0.1	0.1	0.1	0	0.1	0.1
0.3	0	0	0	0	0	0	1.3	0	0	0	0.3	0.1	0.1	0	0.1	0.1
0.7	0	0	0	0	0	0	3.6	0	0	0	0	0.1	0	0.1	0.1	2.1
0.43	0	0	0	0	0	0.1	0.2	0	0	0	0	0	0	0	0.1	0.1
0.4	0	0	0	0	0	0.1	0.15	0	0	0	0	0	0	0	0.1	0
1	0	0	0	0	0.21	0	0.1	0	0	0	0.1	0.1	0.1	0	0.5	0.1
0.7	0.1	0	0	0	0.1	0	0.1	0	0	0	0.1	1.3	0.1	0	0.1	0.1
0.4	0.1	0.1	0	0.1	0.1	0.1	1.65	0.1	0	0	0.1	0.4	0	0.2	0.1	0.1
0.2	0.3	0.1	0	0.1	0.1	0	2.6	0.1	0	0	0.1	0.2	0	0.1	0.1	0.1
0.1	0.1	0	0	0.1	0.1	0.1	1.3	0	0	0	0	0.1	0.1	0.5	0.1	0.1
0.2	0	0	0	0.1	0	0	6.19	0	0	0	0.1	0.1	0.1	0.1	0.1	0.2
0.2	0	0	0	0	0	0	8.6	0	0	0	0.1	0.1	0.1	0	0.1	1.2
1.4	0.1	0	0	0	0	0	2.5	0	0	0	0.1	0.1	0.1	0.1	0.1	2.4
2.4	0	0.1	0.2	0	0	0.1	0.1	0	0.1	0.1	0.1	0	0.1	0.1	0.1	0.2
0.9	0.2	0.1	3.52	0.1	0.1	0	0.1	0.1	0.6	0.4	0.1	0.1	0.1	0.1	0.1	0.1
0.2	0.1	1.8	0.5	6.3	0.79	0	3.5	0.1	0.1	0.1	0.4	0.1	0.1	0.1	0.1	0.1
0.1	0.7	0	0.5	3	0	0	5.7	0	0.3	0.3	0.1	0.8	0.1	2.2	0.1	0.1
0.1	23.85	1.1	23	4.07	0.1	0.1	1.5	0.1	10.86	11.47	0	1.5	0.1	0	0.1	0.1
0.1	0.3	2	0.1	0.1	0.1	0.1	0.1	5.3	0.1	0.1	1.2	0.1	0.2	0.1	0.1	6.9
0.1	0.1	0	0	0.1	0.5	0.1	0	0.1	0	0	0.1	0.1	0.1	0.1	0.1	0.1
0.1	0.4	4.3	0	4	0.1	0.1	0	0.1	0	0	0.1	0.1	0.1	0.6	0.1	0.3
0.1	0.1	0.2	0	0.1	0.1	0	0.1	0.1	0	0	0.1	0.1	0.5	0.6	0.1	0.2
1.9	0.9	3.8	0.1	2	0.4	0	0.1	1	0.1	0.1	0.1	0.1	1.1	0.1	0.1	5.9
0.1	0.1	0.1	0	0.1	0.1	0.1	1	0.1	0	0	0.1	0.1	0.73	0	0.1	0.1
0.1	0	0	0	0.1	0	0.1	0.1	0	0	0	0.1	0.1	0.1	0	0.1	0
0.1	0.1	0	0.1	0.1	0	0	0	0	0	0	0	0.1	0	0	0.1	0
0.1	0.1	0	0.1	0	0	0	0	0	0	0	0	0.1	0.1	0	0.1	0
0.1	0.25	0	0.4	0	0	0	0	0	0.1	0.1	0.1	0.1	0	0	0.1	0
0.1	0.1	0	0	0	0	0	0	0	0	0	0	0	0	0	0.1	0
0.1	0	0	0	0	0	0	0	0	0	0	0	0	0	0	0	0
0.1	0	0	0	0.1	0	0	0	0	0	0	0	0.1	0	0	0	0
0	0	0	0	0.1	0	0	0	0	0	0	0.1	0	0	0	0.1	0
0	0.1	0	0	0	0	0	0	0	0	0	0.1	0	0	0	0	0
0	0.1	0	0.1	0	0	0	0	0	0	0	0	0	0	0	0	0
0	0	0	0.1	0	0	0	0	0	0.1	0.1	0	0	0	0	0	0
0	0	0	0	0	0	0	0	0	0	0	0	0	0	0	0	0
0	0	0	0	0	0	0	0	0	0	0	0	0	0	0	0	0
0	0	0	0	0	0	0	0	0	0	0	0.1	0	0	0	0.1	0
0	0	0	0	0	0	0	0	0	0.1	0.1	0	0	0	0	0.1	0
0	0	0	0	0	0	0	0	0	0	0	0.1	0	0	0	0	0
0	0	0	0	0	0	0	0	0	0	0	0.1	0	0	0	0	0
0.1	0	0	0	0	0	0	0	0	0.1	0.1	0	0	0	0	0	0
0.1	0	0	0.1	0	0	0	0	0	0.1	0.1	0	0	0	0	0.1	0
0	0	0	0	0	0	0	0	0	0.1	0.1	0	0	0	0	0.1	0
0	0	0	0	0	0	0	0	0	0	0	0	0	0	0	0	0
0	0	0	0	0	0	0.1	0	0	0	0	0	0	0	0	0	0
0	0.1	0	0	0	0	0.1	0	0	0	0	0	0.1	0	0	0	0
0	0.1	0	0	0	0	0	0	0	0	0	0.1	0	0	0	0	0
0	0.1	0	0	0.1	0.1	0.1	0	0.1	0.1	0.1	0	0	0	0	0	0
0.1	0.1	0	0.1	0.1	0	0	0	0.1	0.1	0.1	0.1	0	0	0	0	0
0.1	0.1	0	0	0	0	0	0	0	0	0	0.1	0	0	0	0	0
0.1	0	0	0	0	0	0	0	0	0	0	0.1	0	0	0	0	0
0.1	0	0	0	0	0	0	0.1	0	0	0	0	0	0.1	0	0.1	0.1
0	0	0	0	0.1	0	0	0	0	0	0	0	0.1	0.1	0	0.1	0
0	0	0	0.1	0.1	0	0	0	0	0.1	0.1	0	0	0	0	0	0
0	0	0	1.4	0.1	0	0.1	0	0	0.1	0.1	0	0.1	0	0	0	0
0	0.1	1.6	0	0.4	0.1	0.1	0	0.1	0	0	0	0.1	0	0.1	0.1	0
0	0	0	0	0	0.1	0	0.1	0	0	0	0.1	0	0.1	0.1	0.1	0.1
0.1	0	0	0	0	0	0	0.1	0	0	0	0.1	0	0	0	0	0.1
0.1	0	0	0	0	0	0	0	0	0	0	0.1	0	0	0	0	0
0	0	0	0	0	0	0	0	0	0	0	0	0	0	0	0	0
0	0	0	0	0	0	0	0	0	0	0	0	0.1	0	0	0	0
0.1	0.1	0	0.1	0.1	0.1	0	0	0.1	0.1	0.1	0	0.1	0.1	0	0.1	0
0	0	0.1	0	0	0	0	0.1	0.1	0	0	0.1	0	0	0	0.1	0
0.1	0	0	0	0	0	0	0.1	0	0	0	0	0	0	0	0	0
0	0	0	0	0	0	0	0	0	0	0	0	0	0	0	0	0
0	0	0	0	0	0	0	0	0	0	0	0	0	0	0	0	0
0	0	0	0	0	0	0	0	0	0	0	0	0	0	0	0	0
0	0	0	0	0	0	0	0	0	0	0	0	0	0	0	0	0
0	0	0	0	0	0	0	0	0	0	0	0	0	0	0	0	0
0	0	0	0	0	0	0	0	0	0	0	0	0	0	0	0	0
0	0	0	0	0	0	0	0	0	0	0	0	0	0	0	0	0
0	0	0	0	0	0	0	0	0	0	0	0	0	0	0	0	0
0	0	0	0	0	0	0	0	0	0	0	0	0	0	0	0	0
0	0	0	0	0	0	0	0	0	0	0	0	0	0	0	0	0
0	0	0	0	0	0	0	0	0	0	0	0	0	0	0	0	0
0	0.1	0	0	0	0	0	0	0	0	0	0	0.1	0	0	0.1	0
0.1	0.1	0	0	0	0	0	0	0	0	0	0	0.1	0	0	0.1	0
0.1	0	0	0	0	0	0	0	0	0	0	0	0	0	0	0.1	0
0.1	0	0	0	0	0	0	0	0	0	0	0	0.1	0	0	0.1	0
0	0.1	0	0	0	0	0	0	0	0	0	0	0.2	0.1	0	0.1	0
0	0.81	0	0.8	0.1	0	0	0	0.1	0.1	0.1	0	0.1	0.1	0	0	0
0	0.1	0.2	0	0.1	0.1	0	0	0.1	0	0	0	0.1	0	0	0	0
0	8.65	1.4	13.45	0.1	0	0	0	6.5	0.1	0.1	0	0.1	0.1	0	0	0
0	0	11.64	0.1	0.1	0.1	0	0	1.6	0.1	0.1	0.1	0	0.1	0.9	0	0
0	0	17.18	0	0	0.1	0	0.1	0.6	0	0	0.8	0.1	0.1	6.7	0	0.4
0	0	0	0	0	0.1	0	0	0	0	0	0.1	0	0.1	0	0	0
0	0	0	0	0	0	0	0	0	0	0	0	0	0.1	0	0	0
0	0	0	0.1	0.1	0	0	0	0	0.1	0.1	0	0.1	0.1	0	0	0
0	0.3	0	5.58	0.1	0	30.18	0	0	0.1	0.1	0	0.1	0.1	0	0	0
0	0.1	7.03	4.39	5.22	0.4	0.1	0	3.8	26.22	29.28	0	1.4	0.1	0.1	0.1	0
0.1	0	33.63	0	0	6.83	0	0	1.4	0.1	0.1	0.1	0.1	0.1	6.23	0.1	0.2
0.1	0	0	0	0	0.1	0	0.1	0.1	0	0	0.1	0	0.1	0	0.1	0.1
0.1	0	0	0	0	0	0	0	0	0	0	0	0	0.1	0	0.1	0
0.1	0	0	0	0	0	0	0	0	0	0	0	0	0.1	0	0.1	0
0.1	0	0	0	0	0	0	0	0	0	0	0	0	0.1	0	0.1	0
0.1	0	0	0	0	0	0	0	0	0	0	0	0.1	0.1	0	0.1	0
0	0	0	0	0.1	0	0	0	0	0	0	0	0.1	0.1	0	0.1	0
0	0	0	0	0.1	0.6	0	0	0	0	0	0	0.1	0.2	0	0.1	0
0	0	0	0	0.1	0.1	0	0	0	0	0	0	0.1	0.1	0	0	0.1
0	0	0	0.3	0	0.1	0	0	0.1	5.3	5	0	0	0	0	0	0
0.1	0.1	0.1	0.3	0	0.1	0.1	0	0.1	0.1	0.1	0.1	0	0.1	0.1	0.1	0.2
0.1	0	0.1	0.6	0	0	0	0.1	0.1	0.1	0.1	0.1	0	0.1	0	0	1.4
0	0.1	0.1	0.1	0	0	0	0.2	0	0	0	0	0	0.1	0	0	2.7
0	0.1	0.7	0.1	0.8	1.2	0	0.1	0.1	0	0	0	0	1.6	0	0.1	0.1
0	0	2.1	0	0	0.3	0	14.6	0.1	0	0	2	0	0.1	4.6	0	19.38
0	0	0	0	0	0.1	0	0.1	0	0	0	0	0	0.1	0	0	0
0	0	0	0	0.1	0.1	0	0	0.1	0	0	0	0	0.1	0	0	0
0	0	0	0	0	0	0	0	0	0	0	0	0	0.1	0	0	0
0	0	0	0	0.1	0	0	0	0	0	0	0	0	0.1	0	0.1	0
0	0.1	0	0	0	0.1	0	0	0	0	0	0	0.1	0.1	0	0.1	0
0	1.5	0	1	0.6	0.1	0	0	0	0	0	0	0.1	0.1	0	0	0
0	0.1	0.1	0.1	2.1	0.1	0	0	0.1	0.1	0.1	0	0.1	0	0	0	0
0.1	0	9.32	0	0.1	4.5	0	0	2.3	0	0	0.1	0.1	0.1	0.1	0.1	0
0.1	0.1	11.93	0.1	13.07	24.93	0.1	0.1	6.2	0	0	0.1	7.9	0.1	2.1	0.4	2.3
0.1	0	11.3	11.3	0.1	5.1	0	0.1	0.6	0.1	0.1	0.1	0	0.5	5.83	0.1	0.1
0.1	0.1	0	0	0	0.1	0	2.2	0	0	0	0.1	0	0.1	0	0.1	8.91
0.1	0.1	0	0	0	0.4	0	0.2	0	0	0	0.1	0.1	1.5	0	0.1	6.11
0.1	0	0	0	0	0.1	0	5.6	0	0	0	1.1	0.1	6.5	0	0.1	0.3
0.1	0.1	0	0	0	0	0	0.2	0	0	0	0	0	0.1	0	0.1	0.1
0.1	0.6	0	17.86	0	0	0	0	0	1	0.8	0	0.4	0.1	0	0.1	0
1.9	0.1	0	1.4	2.1	0	0	0	4.7	0.1	0.1	0	1.4	0.1	0	0.1	0
1.8	0.1	26.53	0.1	0	23.6	0	0.4	6.2	0	0	1.1	0.1	0.1	8.38	0.1	13.07
0.1	0	0	0	0	0.1	0	19.7	0	0	0	1	0	0.1	0.1	0	13
0	0	0	0.1	0.1	0	0	0.1	0.1	0.1	0.1	0	0	0	0	0	0
0	0.1	0	0	0	0.1	0	0	0	0	0	0	0	0.1	0	0	0
0	0	0	0	0.1	0	0	0	0	0	0	0	0	1.6	0	0	0
0.1	0	0	0.1	0.6	0	0	0	0	0	0	0	0.1	0.1	0	0.1	0
0.1	0.1	5.1	0	0	0.5	0	0	0.8	0.1	0.1	0.1	0	0.1	0.3	0.1	0
0	0	1.2	0	0	0	0	12.6	0.1	0	0	0.8	0	0	0.1	0	0.8
0	0	0	0	0	0	0	4.9	0	0.1	0.1	0.1	0	0	0	0	0.1
0	0.1	0	0.1	0	0	0	2.3	0.1	0.1	0.1	0	0	0	0	0	0
0	0.1	0.1	0	0	0	0	0.1	0.1	0	0	0	0	0	0	0	0
0	0	0	0	0	0	0	9.3	0	0	0	0	0	0	0	0	0.4
0	0	0	0	0	0	0	15.14	0	0	0	0.1	0	0	0	0	0
0	0	0	0	0	0	0	0	0	0	0	0	0	0	0	0	0
0.1	0	0	0	0	0	0	0	0	0	0	0	0	0	0	0.1	0
0.1	0	0	0	0	0	0	0	0	0	0	0	0	0	0	0.1	0
0	0	0	0.1	0	0	0	0	0	0.1	0.1	0	0.1	0.1	0	0.1	0
0	0.1	0	0	0	0.1	0	0	0	0	0	0	0.1	0.3	0	0.1	0
0.1	0.1	0	0	0.1	0.1	0	0	0	0	0	0	0.1	0.1	0	0.1	0.1
0.1	0.1	0	0	0.1	0.1	0.1	0	0.1	0	0	0	0	0.1	0	0.1	0
0.1	0.4	0	0.1	3.7	0.1	0.9	0	0.1	0	0	0	1	0	0	0.1	0
0.1	0.4	5.8	0.9	3.9	1	0.1	0.1	4.62	0.1	0.1	0	1.1	0.1	0.6	0.1	0
0.1	1.4	7.88	10.92	2.2	0.1	0	0.1	0.3	1.5	1.1	0.1	1.5	0	1.7	0.1	0.1
0.1	0.1	1	0	0.1	0.1	0	0	0.1	0	0	0.1	0.1	0	0.1	0.1	0
1	0.1	0.1	0.1	0.1	0.7	0	0	0.1	0.1	0.1	0.1	0.2	0.1	0.6	0.1	0
0.1	0.1	3	9.3	0	1.5	0	0.2	2.5	0.1	0.1	0.1	0	0.1	1.05	0.1	0.1
0.1	0	0	0	0	0	0	2.3	0	0.1	0.1	0.1	0	0	0	0	0.5
0.1	0	0	0	0	0	0	0	0	0	0	0	0	0	0	0.1	0
0.7	0	0	0.1	0	0	0	0	0	10.74	11.4	0	0	0	0	0.1	0
0.1	0.1	2.3	4.12	0	0	0	0.1	0.1	0.1	0.1	0.1	0	0	0.4	0.1	0
0.1	0.1	0.8	10.39	0	0	0.1	5.42	0.1	13.08	14.8	0.1	0	0	0.1	0	0.1
0.1	0	0	0	0	0	0	6.5	0	0	0	0.1	0	0	0	0	1.1
0.1	0	0	0.1	0	0	0	7.42	0	0.1	0.1	0	0	0	0	0	0
0.1	0	0	0.1	0	0	0	0	0.1	1.1	0.84	0	0	0	0	0	0
0.1	0	0	0.3	0	0	0	0	0	0.1	0.1	0	0	0	0	0	0
0.1	0	0.5	1.87	0	0	0	0	0	0.1	0.1	0.1	0	0.1	0.1	0.1	0.1
0.1	0.1	0	0.1	0	0	0	0.1	0	0.1	0.1	0	0	1.18	0	0.1	0.1
0.1	0	0.1	0.1	0	0.1	0	0.3	0	0	0	0	0	0.1	0	0	0.1
0	0	0	0	0.4	0.1	0	4.7	0	0	0	0	0	0	0	0	0.9
0	0	0	0	0	0	0	5.3	0	0	0	1.03	0	0	0	0	0.1
0.1	0	0	0	0	0	0	0.1	0	0	0	0	0	0	0	0	0
0	0	0	0.2	0	0	0	0	0.1	0.1	0.1	0	0	0	0	0	0
0	0	0	0	0	0	0	0.45	0	0	0	0	0	0	0.1	0	0
0	0.1	0	0	0.1	0	0	0.86	0	0	0	0	0	0	0	0	0
0.1	0.1	0.1	0.1	0	0.1	0	0.1	0.1	0.1	0.1	0.1	0	0.1	0	0	0
0	0	2.4	0	0	0.1	0	0.1	0.1	0.1	0.1	0.9	0	0.1	1.8	0	0.7
0.1	0.1	0.1	0	0.1	0.1	0	16.47	0.1	0.1	0.1	0.1	0	0.1	0	0.1	8.6
0.1	0.1	0	0.1	0.1	0.1	0	7.14	0	0.1	0.1	0	0	0.1	0	0.1	0
0.1	0	0	0.1	0	0	0	9.5	0	0	0	0.1	0	0	0.1	0	0
0.1	0	0	0	0	0	0	0	0	0	0	0	0	0	0	0	0
0.1	0	0.1	0.1	0	0.1	0	2.44	0.1	0.1	0.1	0	0	0.1	0	0	0.5
0.1	0.1	5.1	0.3	0	0.1	0	3.5	0.1	0.1	0.1	9.62	0	0	6.81	0	8.1
0.1	0.1	7.1	0.1	0	0.1	0	16.02	0.1	0.1	0.1	0.1	0	0	13.3	0.1	16.11
0.1	0.2	0	0.1	0	0.9	0	2.1	0	0.1	0.1	0.1	0.1	0	0	0.1	0
0.1	0.1	0	0.1	0	0.1	0	0	0.1	1.6	1.2	0	0.1	0.1	0	0.1	0
0.1	1.5	0	0.1	0.1	0.1	0	0.4	0	0.1	0.1	0.1	0.1	0.1	0	0.1	0.1
0.1	0.1	0	0.1	0.1	0.2	0	0.5	0.8	0	0	0.1	0.1	3.6	0	0.1	0.1
0.1	0.1	0	0	0.1	2.8	0	7.32	0	0	0	3	0.1	5.8	0	0.1	4.79
0.1	0	0	0	0	0.3	0	5.2	0	0	0	3.29	1.1	1.6	0	0.1	1.6
0.1	0	0	0	0	0.1	0	2.2	0	0	0	0.1	0.13	0.1	0	0.1	0.1
0.1	0	0	0	0	0.3	0	0.1	0	0	0	0.1	0.1	0.1	0	0.1	0
0.1	0	0	0	0	0	0	2.2	0	0.1	0.1	3.23	0	0.1	0.1	0.1	0.1
0	0	0	0	0	0	0	1.9	0.1	0.1	0.1	16.4	0	0.1	0.1	0	0
0.1	0	0	0	0	0	0	2.3	0.1	0.1	0.1	6.1	0	0.1	6.71	0.1	1.1
0.1	0	0	0	0	0	0	7.8	0	0	0	84.68	0	0.1	1.3	0.1	1.9
0.1	0	0	0	0	0	0	0	0	0	0	17.98	0	0	0	0	0
0.1	0	0	0.2	0	0	0	0	0	1.7	1.4	4.5	0	0.1	0	0	0
0.1	0	0	0	0.1	0	0	0	0	0	0	0.1	0	0	0	0	0
0.1	0.1	0	0	0.1	0	0	0	0	0.1	0.1	0.1	0	0.1	0	0.1	0
0	0	0	0	0	0	0	0	0	0.1	0.1	0.1	0.1	0.1	0	0.2	0
0.1	0	0	0	0	0.1	0	0	0	0.1	0.1	0.1	0	0.1	0	0	0
0.1	0	0	0	0	0	0	0	0	0	0	0	0	0.1	0	0.1	0
0.1	0	0	0	0	0	0	0.1	0	0	0	0	0	0.1	0	0	0.4
0.1	0	0	0	0	0	0	0.1	0	0	0	0.1	0	0	0	0	0
0	0	0	0	0	0	0	0.1	0	0	0	1.6	0	0	0	0	0
0	0.1	0	0	0.1	0	0	0	0	0	0	8.3	0	0.1	0	0	0
0	0.1	0	0	0.1	0.1	0	0.1	0	0	0	10.2	0	0.1	0	0.1	0
0	0	0	0	0.1	0	0	0.1	0	0	0	4.1	0.1	0	0.1	0	0
0	0	0	0	0	0	0	0.1	0	0	0	6.37	0	0	0	0	0
0.1	0.1	0	0	0.1	0.1	0	0.1	0	0	0	5.7	0	0.1	0	0.1	0
0.1	0.1	0	0	0.1	0.1	0	0.1	0	0	0	12.8	0.1	1.6	0.1	0.1	0
0.4	0.1	0	0	0.3	0.1	0.1	12.96	0	0	0	2.1	1.2	0.1	7.3	0.1	2.1
0.1	0	0	0.1	0	0.1	3.69	2.2	0	0	0	0.1	0.1	2.9	0.1	0.1	9
0.2	0.1	0	0	0.4	0.1	0.1	2.8	0	0	0	0.1	0.1	0.5	0.5	0.1	3.9
0.2	0.1	0	0	0.1	0.4	0.1	6.2	0.1	0	0	4.7	0.4	7.52	16.7	5.1	0.8
0.1	0	0	0	0.1	6.6	0	9.3	0	0	0	0.1	0.8	18.18	1.5	0.1	12.94
0.1	0.1	0.1	0	5.9	6	0	22.94	0.1	0	0	8.3	1.5	2.4	4.4	0.1	18.34
0.1	0.1	0.2	0	2.21	0.1	0	32.97	0.1	0.1	0.1	12.7	0.4	0.3	0.1	0.1	9.9
0	0.2	0.1	0	0.1	2.1	0	37.13	0	0.4	0.3	0.1	0	0.1	0.1	0	14.09
0	0.1	0.1	3.06	0.1	0.2	0	24.09	0.1	4.5	4.1	0.1	0	0.1	0	0	0.9
0	0.1	0	0	0.1	0.1	0	0.1	0	0	0	0.1	0	0.1	0	0	0
0	0.1	0	0	0.1	0.1	0.1	0.1	0	0	0	0	0.1	0.1	0	0	0.1
0.1	0.1	0	0	0.1	0.1	16.91	0.9	0	0	0	0.1	0	0.1	0	0	0.1
0.1	0.1	0	0	0.1	0.5	0.1	11.77	0.1	0	0	0.1	0	0.1	0	0	0
0.1	0.2	0.4	0	0.3	0.1	0	6.2	0	0	0	0	0	0.2	0	0	0
0.1	0.1	0	0	0.1	0.1	0.1	0	0	0	0	0.1	0	0.1	0	0	0
0.1	0	0	0	0	0.1	0.1	0	0	0	0	0	0	0	0.1	0	0
0.1	0	0	0	0	0.1	0.1	0	0	0	0	0.1	0	0.1	0	0	0
0.1	0	0	0	0	0.1	0.1	0	0	0	0	0	0	0	0	0	0
0.1	0.1	0	0	0.1	0.1	0	0	0	0	0	0.1	0	0.1	0	0	0
0.1	0	0	0	0	0	0	0.1	0	0	0	0.1	0	0	0	0.1	0
0.1	0	0	0	0	0	0	0.4	0	0	0	0.1	0	0	0	0	0.1
0.1	0	0	0	0	0.1	0	0.1	0	0.1	0.1	0.2	0	0	9	0	0.1
0.1	0.1	0	0.1	0	0.1	0.1	0.1	0.1	0.1	0.1	0.9	0	0.1	6.08	0	2.9
1.2	0	0	0	0	0.1	0	0.1	0.1	0	0	0.1	0	0	0.1	0.1	6.4
0.1	0	0.1	0	0	0	0	3	0.1	0.1	0.1	2.2	0	0	1.8	0.1	1.9
0.1	0	0	0	0	0	0	0	0	0	0	1.28	0.1	0	0.1	0.1	0
0.1	0	0	0.1	0	0	0.1	0	0	0.1	0.1	0.1	0.1	0	0	0.1	0
0.1	0	0.1	0.9	0	0.1	0.1	0	1.1	1.6	1.2	0.1	0.1	0.1	0	0.1	0
0.1	0.1	0	0	0	0.1	0.1	0	0.1	0	0	0.1	0	0.1	0	0.1	0.1
0.1	0.1	0	0	0	0.1	0	0.1	0	0.1	0.1	1	0	1.5	0	0.1	0.1
1.8	0.1	0	0.1	0	0.1	0.1	0.2	0	0.2	0.2	0.3	0	0.1	0	0.1	0
13.83	0.1	0	0.1	0.1	0	0	0	0	0.1	0.1	0.1	1.7	2.69	0	0.1	0.1
32.11	0.1	0	0.1	0.1	0.1	0	0	0	0.1	0.1	0.1	1.9	0.1	0	4.4	0.1
56.29	0.1	0.7	0.1	0.1	0.1	0.1	0	0	0.1	0.1	0.1	3.6	0.1	0.1	12.6	1.4
108.34	0.1	0	0.1	0.1	0.1	0.1	0.1	0	0.1	0.1	0.1	2.2	0.1	0	31.67	0.1
0.1	0	0	0	0.1	0.1	0	0	0	0	0	0.1	0.1	0	0	0	0.1
0.1	0	0	0	0	0.1	0	0	0	0	0	0.1	0.1	0	0	0	0
0.1	0.1	0	0	0.1	0	0	0	0	0	0	0.1	0.1	0	0	0	0
0.1	0.8	0	0.1	1.56	0.1	0.1	0	0	0.1	0.1	0.1	0	0.1	0	0.1	0
0.1	0.1	0	0.2	0.1	1.3	0.1	0	0	0.1	0.1	0.1	0	1.7	0	0	0
0.1	0.1	0	0.1	0.1	1.6	34.63	0	0	0.6	0.5	8.85	0	0.1	0.1	0	0
0.1	0	0	0.1	0	0.1	38.38	0.1	0	3	2.5	0.1	0.1	0	0	0.1	0
0.1	0.1	0	0.1	0.1	0	12.76	0	0	0.1	0.1	0	0.1	0	0	0.1	0
0.1	1.8	0	0.1	0.1	0	1.75	0.1	0.1	0	0	0.1	0.1	0	0	0.1	0
0.1	0	0	0	0	0.1	2.2	2.5	0	0	0	0.1	0.1	0.1	0	0.1	0.1
0.1	0	0	0	0	0.1	3.31	4.6	0	0	0	0.1	0.1	0.1	0	0.1	0.1
0.1	0	0	0	0	0	3.8	0	0	0.1	0.1	0.1	0.1	0.1	0.1	0.1	0.1
0.1	0	0	0	0	0	4.4	0	0	0.1	0.1	0.1	0.2	0.1	0	0.1	0
0.1	0	0	0	0.1	0	0.65	0	0	0.1	0.1	0.1	0.1	0.1	0	0.1	0.1
0.1	0	0	0	0	0	0.1	0.1	0	0.2	0.1	0.1	0.1	0	0	0.1	0.1
0.1	0	0	0	0	0	1.4	0	0	0	0	2.5	0.1	0	0	0.1	0.2
0.1	0	0	0	0.1	0	4.97	0.1	0	0.1	0.1	11.4	0.1	0.1	0.1	0.1	0.1
0.1	0	0	0.1	0.1	0	1.7	0.1	0	0.1	0.1	9.4	0.1	0	0.1	0.1	0.1
0.6	0	0	0.1	0	0.1	1.7	0.1	0.1	0.1	0.1	7.7	0.1	0	0.1	0.1	0.1
1.4	0	0	0	0	0.1	0.3	0.1	0	0.1	0.1	14	0.1	0	0	0.1	0
7.1	0	0	0	0	0.3	1.9	0.1	0	0	0	16.23	0.1	0	1.6	0.1	0
0.1	0	0	0	0	0.1	0.1	1.3	0	0.1	0.1	2.1	0.1	0.2	2.33	0.1	2.1
1.2	0.1	0.1	0.1	0	2.3	0.1	4.6	0	0	0	9.9	0.1	0.1	1.3	0.1	6
5.5	0	0.1	0	0	4.88	0.1	25.49	0	0	0	20.64	0.1	1.7	20.93	0.1	62.48
1.7	0	9.93	0	0	1.2	0.1	15.1	0	0	0	55.83	0	3	25.51	3.31	65.17
0.2	0	0.1	0	0	0.1	0.1	38.2	0	0	0	54.96	0.1	11.12	34.94	11.93	14.5
0.1	0	0	0	0	0.1	0.1	0.1	0	0	0	28.48	1.7	0.1	0.4	0.1	0.6
0.1	0	0	0	0	0.1	0.1	2.54	0	0	0	18.1	0.1	0	1.16	0.1	0.1
0.2	0	0	0	0	0	0.3	20.89	0	0	0	3.3	0.1	0	2.4	0.1	0.6
0.9	0	0.1	0	0	0.1	4.61	65.72	0	0	0	2.9	0.1	0.1	0.1	0.1	24.6
1.6	0	5.3	0	0	1.2	1.5	62.89	0	0	0	7.7	0.1	0.1	2.86	0.1	94.12
0.4	0	15.96	0	0	22.43	2.34	24.1	14.1	0	0	24.72	0.1	1.8	7.3	0.1	42.61
3	0.7	3	0	7.1	57.36	0.5	2.2	45.76	0.1	0.1	4	1.2	0.1	8.5	0.1	0.1
6.43	17.83	3	0.1	18.44	5.14	0.3	1.49	11.13	0.1	0.1	2.2	0.1	0.2	6.3	0.1	1.7
7.98	15.98	1.8	0.1	15.6	4.2	32.21	0.1	23.16	0.1	0.1	13.73	0.1	0.1	6.1	1	7.6
0.1	1.1	4.9	0	2.6	11.02	0.1	0	17.21	0.1	0.1	0.4	9.9	0.1	1.9	0.1	0.1
1.3	15.64	3.4	0	9.5	0.2	0.1	0.1	11.94	0.1	0.1	0.1	38.11	15.5	0.9	2	0.1
11.34	18.78	0.1	0.1	0.36	0.1	0.1	0.1	0.1	0.1	0.1	0.5	17.83	50.11	0.5	1.1	0.1
8.5	17.31	0.1	0.1	13.28	17.2	0.1	1.2	0.1	0.9	0.7	6.8	6.72	12	0.9	1.3	2.7
1.9	6.48	0.1	10.42	21.81	16.59	4	1.3	0.1	12.3	13.35	3.3	0.7	6.8	0.43	0.89	1.3
3.5	5.9	0.1	0	28.37	26.12	11.46	1.2	0.1	0.1	0.1	2	12.15	10.1	1.2	0.6	10.28
3.05	9.78	0	0.5	18.26	48	20.84	15.97	0.1	0.1	0.1	0.6	26.25	13.2	5.1	1.5	20.84
1.21	1.9	0.1	0	11.06	34.7	132.39	20.7	0.3	0.1	0.1	0.1	15.84	9.81	0.1	6.6	21.49
1.23	1.2	0	0.1	6.75	45.39	140.83	20.24	0.4	0.1	0.1	0.1	4.45	1.7	0.1	21.02	25.4
2.2	7.8	0	0.5	33.89	24.66	41.8	25.43	0.1	0	0	0.1	2.7	24.72	0.1	22.93	21.26
1.6	1.3	0.1	0.1	9.6	26.84	65.35	14.5	0.1	1.6	1.2	15.6	18.25	29.49	5.5	12.21	18.38
0.1	32.5	9.2	14.19	3.4	43.15	35	2.7	19.56	4.92	4.6	16.43	5	2.2	5.24	8.29	4.7
0.1	41.95	16.1	0.1	48.93	18.3	16.76	1.49	56.41	0.1	0.1	6.4	23.13	0.1	7.7	0.66	11.2
0.1	5	10.3	0.1	17.77	6	1.3	9.4	30.73	0.83	0.6	0.1	49.01	0.6	7.2	5.8	6.5
1.4	54.94	3.3	0.1	12.7	1.2	4.4	1.3	3	4.7	4.28	0.2	9.9	11.18	0.5	0.2	3.8
2.3	3	2.1	0.1	6.1	0.7	2.74	0.1	5.7	11.98	12.93	2.1	29.46	0.3	0.1	1.9	0.5
0.3	0.1	1.9	2.3	0.4	0.1	0.1	0.1	0.3	10.68	11.4	0.1	0.8	8	1.1	4.2	0.1
1	0.4	0.5	19.27	1.7	4.3	0.65	0	1.8	22.55	23.92	7.1	0.2	0.9	4.4	0.1	0.3
2.7	9.2	20	24.63	0.1	14.16	0.1	0.1	2.26	14.54	16.41	0.7	0.1	4.8	6.1	0.7	0.1
1.6	17.1	3.3	17.7	19.78	8.05	0.2	3.6	14.71	12.43	13.64	1.44	0.7	27.37	0.1	0.1	0.1
5.7	7.37	0.1	0	10.1	5	15.96	0.1	0.1	0.1	0.1	0.1	0.1	3.8	0.1	0.1	0.1
13.11	1.7	0.1	0	2.8	2.8	0.1	0.1	0.1	0	0	0.1	5.41	4.2	0.1	3.38	0.2
6.53	0.5	0	0	2.1	6.1	0.1	0.2	0.1	0.1	0.1	0.1	10.12	5.45	0.1	24.4	0.9
2.3	1.7	0.1	0.1	14.83	17.09	0.1	8.8	0.1	0.8	0.6	0.77	19.74	7.1	0.3	15.52	11.21
0.8	6.9	0	0.1	23.81	61.89	0.1	13.38	5.1	0.1	0.1	9.37	12.45	6.83	1.11	4.42	11.2
5.35	4.4	0.1	0	22.43	26.39	0.1	30.85	0.1	0.1	0.1	11.8	13.48	6.3	8.2	8.5	32.09
3.76	0.1	6.25	0	15.3	30.59	1.3	36.19	2	0	0	31.3	26.87	10.68	18.62	4.28	40.13
0.9	0.1	21.94	0	0.1	0.79	1.9	28.49	8.2	0.1	0.1	44.37	9.9	13.38	52.26	17.8	10.65
0.3	0	35.32	0	0.1	10.7	0.1	24.15	28.67	0	0	48.38	0.5	1.3	80.7	31.4	17.2
2.3	0	73.28	0	0.1	7.41	0.1	12.17	6.37	0	0	39.79	0.1	0.1	86.15	0.6	21.3
2.7	0	112.27	0	0.1	3.7	0.1	4.7	28.6	0	0	3.3	0.1	0.1	48.9	0.1	21.87
4.12	0.1	83.69	0	0.1	23.23	0.1	11	11.18	0	0	2	0.1	0.1	21.64	0.1	13.9
3.9	5.84	92.02	0	6.3	13.1	0.54	27.3	27.77	0	0	6.7	0.1	0.1	23.8	0.1	12
1.6	0.1	127.59	0	0.1	17.09	0.1	3.6	20.57	0	0	40.45	0.1	0.1	37.48	0.1	8.53
2.92	0	89.05	0	0	0.5	0.1	0.1	0.2	0	0	15.6	0.1	0.2	86.37	0.1	8.7
2.3	0.1	33.98	0	0	0.1	0.1	0.1	0	0	0	0.1	0.1	3	87.9	0.1	34.44
2.8	0	2	0	0	0.1	0.5	14.73	0	0	0	16.36	0.1	0.1	30.48	0.1	36.79
1.2	0	12.9	0.1	0	0.1	0.1	13	0	0	0	9.2	0.1	0.1	27.04	0.1	35.7
2.7	0.1	2.49	0	0	0.1	0	15.86	0	0	0	20.35	0.1	0.2	29.74	0.1	25.14
7.8	0.1	0.1	0	0	0.1	0.1	15.31	0	0.1	0.1	18.47	0.1	5.19	30.56	0.1	9.82
2.9	0	0.1	0	0	0.1	0.1	9.4	0	0	0	17.18	0.1	31.54	6.7	31.96	1.8
1.9	0	2.5	0	0	0.1	0	3.4	0	0	0	6.3	16.69	0.62	15.3	25.1	7.7
1.1	0.1	0	0	0	0.1	0	1.2	0	0	0	21.09	1	9.63	8	0.1	14.09
0.5	0	0	0	0	0.1	0	0.1	0	0	0	18.38	8.68	10.15	5.2	0.4	5.2
6.8	0.1	0	0	0	0	0	0.1	0	0	0	11.8	10	27.61	7.03	26.27	0.1
19.38	0	0	0	0	0.1	0	0.1	0	0	0	4.5	2.1	17.37	3.1	30.4	0.4
84.32	0	12.9	0	0	0.6	0	0.1	0	0	0	0.1	3.32	0.1	0.1	0.1	0.1
43.33	0	7.4	0	0.1	0.5	0	0.1	2.78	0	0	0.1	5.39	8.4	1.2	0.1	0.1
2.5	0.1	1	0	0.1	0.1	0	0.1	3.8	0	0	6.8	2.4	11.29	0.1	0.7	0
1.1	0.9	0.1	0.1	0.1	0.1	26.95	0.1	1.5	0.6	0.5	0.8	0.5	2.51	0.8	0.1	0
0.3	2.9	0	0.1	3.3	0.1	0.1	0.1	0.1	3.2	2.8	0.1	0.8	3.1	0.2	0.1	0.1
0.9	8.4	0.1	13.61	1.21	0.1	0.3	0	3	24.31	25.99	0.1	3.5	3.1	0	0.1	0.2
0.8	3.5	0.1	5.75	0.5	2.5	0.1	0.1	1.36	12.41	13.58	17.43	0.1	0.1	0	0.5	1.3
0.6	0.1	0.1	0	1.92	3.3	0.1	2	0.1	0.1	0.1	20.19	0.1	0.7	0.1	0.1	8.7
3.1	0.1	0.7	0	7.23	3.9	0.1	1.6	0.1	0	0	16.11	4.41	12.71	5	2.9	5.8
12.96	0.1	10.45	0	3.2	7.9	0.1	0	0.1	0	0	18.9	16.13	11.95	51.86	9	0.5
11.6	0.1	0.1	0	2.8	0.5	0.1	0.1	0.1	0	0	86.29	0.5	0.1	42.81	5.62	0.1
1.6	0.1	0	0	0.1	0.1	0.1	0.1	0	0	0	55.52	2.1	0.1	11.4	0.1	0
1.7	0.1	0.1	0	0.1	0.3	0.1	0.1	0	0	0	21.84	0.1	0.1	21.61	0.1	0.1
0.6	0.1	0.1	0	0.1	5.3	0.1	0.1	0	0	0	23.27	0.1	0.1	33.99	0.1	0.3
0.3	0	0.1	0	0.1	0.1	0.1	0.3	0	0	0	85.44	0.2	0.4	12.5	0.1	1.7
1.3	0	0	0	0	0.7	0.1	0.1	0	0	0	74.89	0.3	2.5	0	0.1	0.1
0.7	0	0	0	0	0.1	0	0.2	0	0	0	51.28	0.1	3.1	0.1	4.9	0.1
0.1	0	0	0	0	0.1	0	0	0	0	0	54.14	0.3	0.4	0	0.1	0.1
0.1	0	0	0	0	0.1	0	0	0	0	0	33.5	0.1	0.1	0	0.1	0.1
0.1	0	0	0	0	0	0	0	0	0	0	27.26	0.1	0.1	0	0.1	0
0.8	0.1	0	0	0	0.1	0	0	0	0	0	15.6	0.1	10	0.4	0.1	0.1
0.4	0	0	0	0.1	0.1	0	0.1	0	0	0	28.55	18.63	2.06	6.71	9.5	0.5
0.82	0	0	0	0	0.1	0	0.2	0	0	0	36.25	5.6	0.1	0.4	2	0.1
0.3	0	0	0	0	0.5	0	0.1	0	0	0	9.4	0	0.1	0	0.1	0
0.1	0	0.1	0	0	0.1	0	0	0.1	0	0	10.73	0.1	0.1	0.1	0.1	0.1
0.5	0.1	0	0	0.1	0.1	0	0.1	0.1	0	0	8.42	0.1	0.6	4.2	0.1	0.5
0.1	0.1	0	0	0.1	0.1	0	0.1	0	0	0	0.1	0.3	0.1	8.9	0.1	2.1
0.1	0	0	0	0	0.1	0	0.1	0	0	0	0.1	0.1	0.1	8.9	0.1	3.4
0.1	0	0	0	0.1	0	0	0	0	0	0	3.4	0	0.1	17.37	0.1	5.49
0.1	0	0	0	0.1	0.1	0	0.1	0	0	0	0.1	0	0.1	19.6	0.1	7.25
0.1	0	0	0	0	0.1	0.1	17.1	0	0	0	0.1	0	0.1	5.8	0	6.9
0.1	0	0.1	0	0	2.3	0	21.7	0	0.1	0.1	5.1	0.1	0	0.1	0	9
0	0	0	0	0	1.4	0	15.67	0	0	0	0.1	0.1	0.1	1.3	0.1	3
0.1	0	0	0	0	0.1	0.1	7.3	0	0	0	1.7	0.1	0.1	0	0.1	2.9
0.1	0	0	0	0	0.1	0	2	0	0	0	0.1	0.1	0.1	0.1	0.1	0.1
0.1	0	0	0	0.1	0	0	0.1	0	0	0	0	0.1	0.1	0.1	0.1	0.1
0.1	0	0	0	0.1	0	0.1	0.1	0	0	0	0.1	0	0	0.1	0.1	0.2
0.1	0	0	0	0	0	0.1	0.1	0	0	0	0	0	0.1	0	0.1	0.1
0.1	0.1	0	0	0	0	0.1	0	0	0	0	0	0	0	0	0.1	0
0.1	0.1	0	0	0	0	0.1	0	0	0.1	0.1	0.1	0	0	0	0.1	0
0.1	0.1	0	0	0	0	0.1	0.3	0	0	0	2.3	0	0.1	1	0	0.1
0.9	0	0	0	0	0.1	0	2.2	0	0	0	0.1	0	0	0.52	0.1	0.1
0.4	0	0	0	0	0.1	0	28.51	0	0	0	2.2	0	0	2.9	0.1	0.3
0.1	0	0	0	0	0	0	35.07	0	0	0	8.79	0	0	0.1	0.1	12.2
0.1	0.1	0	0	0	0	0	27.33	0	0	0	27.15	0	0	13	0.1	8
0	0	0	0	0	0	0	43.51	0	0	0	18.06	0	0	13.48	0	0.1
0.1	0	0	0	0	0	0	14.6	0	0	0	14.88	0	0	0.1	0	0
0.1	0	0	0	0	0	0	0	0	0	0	0.1	0	0.1	0	0.1	0.1
0.1	0.1	0	0	0	0	0	0.1	0.1	0	0	0.1	0	0	0	0.1	0.1
0.4	0	0.1	0	0	0	0	0.3	0	0	0	0.1	0	0.1	0.1	0.1	1.8
0.8	0	0	0	0	0	0	1.49	0	0	0	0.1	0	0	0.1	0.1	0.1
0.1	0	0	0	0	0	0.1	0	0	0	0	0	0	0.1	0	0.1	0.1
0.1	0	0	0	0	0	0	0	0	0	0	0	0	0	0	0.1	0
0.1	0	0	0	0	0	0	0	0	0	0	0	0	0	0	0	0
0.1	0.1	0	0	0	0	0	0	0	0.1	0.1	0	0	0	0.1	0	0
0.1	0.1	0	0	0	0	0	0	0	0.1	0.1	0.1	0	0	0	0	0
0	0	0	0	0	0	0	0	0	0	0	0.1	0	0	0	0	0
0	0	0	0	0	0	0	0	0	0	0	0.1	0	0	0	0	0
0	0	0	0	0	0	0	0	0	0	0	0.1	0	0	0	0	0
0.1	0	0	0	0	0	0	0	0	0	0	0.1	0	0	0	0	0
0	0	0	0	0	0	0	0	0	0	0	0.1	0	0	0	0	0
0.1	0	0	0	0	0	0	0	0	0	0	0	0	0	0	0	0
0.1	0	0	0	0	0	0	0	0	0	0	0	0	0	0	0	0
0.1	0	0	0	0	0	0	0	0	0	0	0	0	0	0	0	0
0	0	0	0	0	0	0	0	0	0	0	0.1	0	0	0	0.1	0
0	0	0	0	0	0	0	0	0	0	0	0	0	0	0	0	0
0.1	0	0	0	0	0	0	0	0	0	0	0	0	0	0	0	0
0.1	0	0	0	0	0	0	0.1	0	0	0	0	0	0	0	0	0
0	0	0	0	0	0	0	2.47	0	0	0	0	0	0	0	0	0
0.1	0	0	0	0	0	0	0	0	0	0	0	0.1	0	0	0.1	0
103.58	0	0	0	0	0	0	0	0	0	0	0	0	0.1	0	1.48	0
17.72	0	0	0	0	0	0	0	0	0	0	0	0	0.3	0	0.1	0
11.6	0	0	0	0	0	0	0	0	0	0	0	0	0	0	0.1	0
1	0	0	0	0	0	0	0	0	0	0	0	0	0	0	0	0
0.1	0	0	0	0	0	0	0	0	0	0	0	0	0	0	0	0
0.1	0	0	0	0	0	0	0	0	0	0	0	0	0	0	0	0
0.1	0	0	0	0	0	0	0	0	0	0	0	0	0	0	0	0
0	0	0	0	0	0	0	0	0	0	0	0	0	0	0	0	0
0	0	0	0	0	0	0	0	0	0	0	0	0	0	0	0	0
0	0	0	0	0	0	0	0	0	0	0	0	0	0	0	0	0
0	0	0	0	0	0	0	0.2	0	0.1	0.1	0	0	0	0	0	0
0	0	0	0	0	0	0	0.5	0	0	0	0	0	0	0	0	0.1
0	0	0	0	0	0	0	0.1	0	0	0	0	0	0	0	0	0
0	0	0	0	0	0	0	0.1	0	0	0	0	0	0	0	0	0
0	0	0	0	0	0	0	0	0	0	0	0	0	0	0	0	0
0.1	0	0	0	0	0	0	0	0	0	0	0	0	0	0	0	0
0	0	0	0	0	0	0	0.1	0	0	0	0	0	0	0	0	0
0	0	0	0	0	0	0	9.27	0	0	0	0	0	0	0	0	0.1
0	0	0	0	0	0	0	17.53	0	0	0	0.1	0	0.1	0	0	1.6
0	0	0.1	0	0	0.1	0	9.37	0	0	0	0.1	0	0.1	0.2	0	3.2
0	0	0	0	0	0	0	9.06	0	0	0	0.1	0	0.1	0.1	0	0.2
0	0	0	0	0	0	0	2	0	0	0	0	0	0.1	0	0	0.1
0	0	0	0	0	0	0	0	0	0	0	0	0	0	0	0	0
0.1	0	0	0	0	0	0	0	0	0	0	0	0	0	0	0	0
0	0	0	0	0	0	0	0	0	0	0	0	0	0	0	0	0
0	0	0	0	0	0	0	0	0	0	0	0	0	0	0	0	0
0	0	0	0	0	0	0	0	0	0	0	0	0	0	0	0	0
0	0	0	0	0	0	0	0	0	0	0	0	0	0	0	0	0
0	0	0	0	0	0	0	0.1	0	0.1	0.1	0	0	0	0	0	0.1
0	0	1	0	0	0	0	0.7	8.3	0	0	0.1	0	0	0.6	0	2.3
0.1	0	3.3	0	0	0.1	0	9.8	0.5	0	0	10.4	0	0	0.9	0	0.1
0.1	0	0.1	0	0	0	0	0.5	0	0	0	0.45	0	0	0	0	0.1
0.1	0	0	0	0	0	0	0.1	0	0	0	0	0	0	0	0.1	0
0.1	0	0	0	0	0	0	0	0	0	0	0	0	0	0	0	0
0	0	0	0	0	0	0	0	0	0	0	0	0	0	0	0	0
0	0	0	0	0	0	0	0	0	0	0	0	0	0	0	0	0
0	0	0	0	0	0	0	0	0	0	0	0	0	0	0	0	0
0	0	0	0	0	0	0	0	0	0	0	0	0	0	0	0	0
0	0	0	0	0	0	0	0	0	0	0	0	0	0	0	0	0.1
0	0	0	0	0	0	0	0.1	0	0	0	0	0.1	0.1	0	0.1	0.1
0.1	0.1	0	0.1	12.68	0.1	2	0.1	0.1	0.1	0.1	0	0.1	2.9	0	0.1	0
0.1	5.9	13.31	0.1	14.82	0.5	0	0	13.77	0.1	0.1	0	0.1	0.1	0.1	1.2	0
0.1	0	11.96	0	0	0.1	0	0	0	0	0	0.1	0	0	0.1	0.1	0.2
0.1	0	0	0	0	0.1	0	0.1	0	0	0	0	0	0	0	0.1	0.1
0	0	0	0	0	0	0	0.1	0	0	0	0	0	0	0	0.1	0
0.1	0	0	0	0	0	0	0	0	0	0	0.1	0	0	0	0.1	0
0.1	0	0	0	0	0	0	0	0	0	0	0	0	0	0	0.1	0
0.1	0	0	0	0	0	0	0	0	0	0	0	0	0	0	0.1	0
0.1	0	0	0	0	0	0	0	0	0	0	0	0	0	0	0.1	0
0	0	0	0	0	0	0	0	0	0	0	0	0.1	0.1	0	0.1	0
0	0	0	0	0	0	0	0	0	0	0	0	0.1	0	0	0.1	0
0	0	0	0	0	0	0	0	0	0	0	0	0	0	0	0	0
0	0	0	0	0	0	0	0	0	0	0	0	0	0	0	0	0
0	0	0	0	0	0	0	0	0	0.1	0.1	0	0	0	0	0	0
0.1	0.1	0	0.1	0	0	0	0	0	0.7	0.5	0	0	0	0	0	0
0	0.1	0	0.1	0	0	0	0	0	0	0	0	0	0	0	0	0
0	0.1	0	68.76	0	0	0	0	0	84.84	77.7	0	0	0	0	0	0
0	0	0	0.1	0.1	0	0	0	0	0.1	0.1	0	0.1	0	0	0	0
0	0	0	0	0	0	0	0	0	0	0	0	0	0	0	0	0
0	0	0	0	0	0	0	0	0	0	0	0	0	0	0	0	0
0	0	0	0	0	0	0	0	0	0	0	0	0	0	0	0	0
0	0	0	0	0	0	0	0	0	0	0	0	0	0	0	0	0
0	0	0	0	0	0	0	0	0	0	0	0	0	0	0	0	0
0	0	0	0	0	0	0	0	0	0	0	0	0	0	0	0	0
0	0	0	0	0	0	0	0	0	0.1	0.1	0	0	0	0	0	0
0	0	0	0	0	0	0	0	0	0	0	0	0	0	0	0	0
0	0	0	0	0	0	0	0	0	0	0	0	0	0	0	0	0
0	0	0	0	0	0	0	0	0	0	0	0	0	0	0	0	0
0	0	0	0.48	0	0	0	0	0	2.88	2.31	0	0	0	0	0	0
0	0	0	1.8	0	0	0	0	0	2.8	2.3	0	0	0	0	0	0
0	0	0	0	0	0	0	0	0	0	0	0	0	0	0	0	0
0	0	0	0	0	0	0	0	0	0.1	0.1	0	0	0	0	0	0
0	0	0	2	0	0	0	0	0	0.1	0.1	0	0	0	0	0	0
0	0	0	0	0	0	0	0	0	0	0	0	0	0	0	0	0
0	0	0	0.1	0	0	0	0	0	0	0	0	0	0	0	0	0
0	0	0	0.1	0	0	0	0	0	0.1	0.1	0	0	0	0	0	0
0	0	0	0.48	0	0	0	0	0	2.3	1.79	0	0	0	0	0	0
0	0.1	0	0.1	0	0	0	0	0	0.1	0.1	0	0	0	0	0	0
0	0	0	0	0	0	0	0	0.1	0	0	0	0	0	0	0	0
0	0	0	0	0	0	0	0	0.1	0	0	0	0	0	0	0	0
0	0	0	0	0	0	0	0	0	0	0	0	0	0	0	0	0
0	0	0	0	0	0	0	0	0	0	0	0	0	0	0	0	0
0.1	0.1	0	0.6	0	0	0	0	0	0.1	0.1	0	0	0	0	0.1	0
0.1	0	0	0.1	0	0	0	0	0	0.1	0.1	0	0.1	0	0	0.1	0
0.1	0	0	20.66	0	0	0.1	0	0.1	23.05	24.29	0	0.1	0.1	0	0	0
0	0	11.08	0	0	0.3	0	0	1.5	0.1	0.1	0.1	0	0.1	2.4	0	0.1
0.1	0	0	0	0	0	0	0.1	0	0	0	0.1	0	0	0	0	0.1
0	0	0	0	0	0	0	0	0	0.1	0.1	0	0	0	0	0	0
0	0	0	0.1	0	0	0	0	0	2.3	1.7	0	0	0	0	0	0
0	0	0	0.1	0	0	0	0	0	0.1	0.1	0	0	0	0	0	0
0	0	0	0	0	0	0	0	0	0	0	0	0	0	0	0	0
0	0	0	0	0	0	0	0	0	0	0	0	0	0	0	0	0
0	0	0	0.1	0	0	0	0	0	0.1	0.1	0	0	0	0	0	0
0	0.1	0	0.1	0	0	0	0	0	0.1	0.1	0	0	0	0	0	0
0	0	0	8.4	0	0	0	0	0	4.2	3.9	0	0	0	0	0	0
0.1	0	0	0.1	0	0	0	0	0	0.1	0.1	0	0.1	0.1	0	0.1	0
0.1	0	0.3	0	0.4	0.1	0	0	0.1	0	0	0.1	0.1	1.9	0.4	0.1	0
0	0	4.2	0	0	0.1	0	0.1	1	0	0	0.1	0	0.8	1.6	0.1	0.1
0.2	0	0	0	0	0	0	0	0	0	0	0	0	0.2	0	0.1	0
0.4	0.1	0	0.1	2.3	0	0	0	0	0.1	0.1	0	0.1	0.1	0	0.1	0
0.1	0	1.84	1.9	0.1	1.9	0	0	3.2	0.1	0.1	0.1	0.1	0	0.1	0.1	0
0.1	0.1	1.2	16.57	0.1	0.3	0.1	0	3	5.3	5	0	1.4	0	0	0	0.1
0.1	0.1	0.1	1.3	0	0.1	0.1	0.1	0.8	7.5	7.15	0.7	0.1	0	0.3	0.1	0.1
0	0.1	1.62	0	0	0.1	0	1.3	0	0	0	0.1	0	0	0	0	0.3
0	0	0	0	0	0	0	0.4	0	0	0	0	0	0	0	0	0
0	0	0	0	0	0	0	0	0	0	0	0	0	0	0	0	0
0.1	0	0	0	0	0	0	0	0	0	0	0	0	0	0	0	0
0	0	0	0	0	0	0	0	0	0	0	0	0	0	0	0	0
0	0	0	0	0	0	0	0	0	0	0	0	0	0	0	0	0
0	0	0	0	0	0	0	0	0	0	0	0	0	0	0	0	0
0	0	0	0	0	0	0	0	0	0	0	0	0	0	0	0	0
0	0	0	0	0	0	0	0	0	0	0	0	0	0	0	0	0
0	0	0	0	0	0	0	0	0	0	0	0	0	0	0	0	0
0	0	0	0	0	0	0	0	0	0	0	0	0	0	0	0	0
0	0	0	0.1	0	0	0	0	0	0.1	0.1	0	0	0	0	0	0
0	0.1	0.1	0	0	0.1	0	0	0.1	0	0	0	0	0.1	0	0	0
0	0	0	0	0	0	0	0	0	0	0	0	0	0	0	0	0.1
0	0	0	0	0	0	0	0	0	0	0	0	0	0	0	0	0
0	0	0	0	0	0	0	0	0	0	0	0	0	0	0	0	0
0	0	0	1	0	0	0	0	0	0.6	0.5	0	0	0	0	0	0
0	0	0	0.2	0	0	0	0	0	0.4	0.3	0	0	0	0	0	0
0	0	0	0	0	0	0	0	0	0	0	0	0	0	0	0	0
0.1	0	0	0.3	0	0	0	0	0	0.3	0.3	0	0	0	0	0	0
0	0	0	0	0	0	0	0	0	0	0	0	0	0	0	0	0
0	0	0	0	0	0	0	0	0	0	0	0	0	0	0	0	0
0	0	0	0	0	0	0	0.1	0	0	0	0	0	0	0	0	0.1
0	0	0	1.6	0	0	0	0	0	0.1	0.1	0	0	0	0	0	0
0	0	0	0.5	0	0	0	0	0	0.1	0.1	0	0	0	0	0	0
0	0	0	0	0	0	0	0	0	0	0	0	0	0	0	0	0
0	0	0	0	0	0	0	0	0	0.1	0.1	0	0	0	0	0	0
0	0	0	0	0	0	0	0	0	0	0	0	0	0	0	0	0
0	0	0	0	0	0	0	0	0	0	0	0	0	0	0	0	0
0	0	0	0	0	0	0	0	0	0.1	0.1	0	0	0	0	0.1	0
0	0	0.1	0	0	0	0	0	0.1	0	0	0	0	0.1	0	0.1	0
0.1	0	0	0	0	0	0	0	0	0	0	0	0	0.1	0	0.1	0.1
0.4	0.1	0	0	0.1	0.1	0.1	0	0.1	0	0	0	0.1	0	0	0.1	0.1
0.1	0.1	0	0.1	0.1	0.1	0.1	0	1.1	0.1	0.1	0	0	0	0	0.1	0
0.1	0.1	0	0.1	0.1	0.1	0.1	0	0	0	0	0.1	0.1	0.1	0	0.1	0
0.1	0.1	0	0	0.1	0	0	0	0.1	0	0	0	0.1	0.1	0	0.1	0
0.1	0	0	0	0	0	0	0	0	0	0	0	0.1	0	0	0.1	0
0.1	0	0	0	0	0	0	0	0	0	0	0	0	0	0	0.1	0
0.1	0	0	0	0	0	0	0	0	0	0	0	0	0	0	0.1	0
0.1	0	0	0	0	0	0	0	0	0	0	0	0	0	0	0.1	0
0	0	0	0	0	0	0	0	0	0	0	0.1	0	0	0	0.1	0
0	0	0	0	0	0	0	0	0	0	0	0.1	0	0	0	0	0
0.1	0	0	0	0	0	0	0	0	0	0	0.1	0	0	0	0	0
0.1	0	0	0	0	0	0	0	0	0	0	0.1	0	0	0	0.1	0
0	0	0	0	0	0	0	0	0	0	0	0.3	0	0	0	0.1	0.1
0.1	0	0	0	0	0	0	0	0	0	0	0.1	0	0.1	0	0	0.1
0	0.1	0	0	0	0	0	0	0	0.1	0.1	0.1	0	0	0	0	0
0	0	0.1	0	0.1	0.1	0	0.1	0	1.9	1.46	0.1	0	0	0.1	0.1	0.1
0.1	0.1	0	0	0	0	0	0	0	0	0	0	0	0	0	0	0
0.1	0	0	0.1	0	0	0	0	0	0.1	0.1	0.1	0	0	0	0	0.1
0.1	0	0	0.7	0	0	0	0	0	0.2	0.2	0.1	0	0	0	0	0
0.1	0	0	0	0	0	0	0	0	0	0	0.1	0	0	0	0	0
0.1	0	0	0	0	0	0	0	0	0	0	0	0	0	0	0.1	0
0.1	0	0	0.1	0	0	0	0	0	0.1	0.1	0	0.1	0.1	0	0.1	0
0.4	0	0	0.1	0	0.1	0.1	0	0.1	0.1	0.1	0	0.1	0.1	0	0.1	0
0.1	0.1	0.1	0.1	0.1	0.1	0	0	0.1	0	0	0	0.1	0.1	0	0.1	0
0.1	0	0	0	0	0.1	0	0	0	0	0	0	0.1	0.1	0	0	0.1
0.1	0.1	0	0	0	0	0	0	0	0	0	0.1	0	0.1	0	0.1	0.1
0.1	0	0	0	0	0	0	0	0	0	0	0.1	0	0.1	0	0	0.1
0.1	0	0	0	0	0	0	0	0	0.1	0.1	0.1	0	0	0	0	0
0	0	0	0	0	0	0	0	0	0.1	0.1	0	0	0	0	0	0
0.1	0	0	0	0	0	0	0	0	0	0	0.1	0	0	0	0.1	0
0.1	0	0	0	0	0	0	0	0	0	0	0.1	0	0	0	0	0
0.1	0	0	0	0	0	0	0	0	0	0	0.1	0	0	0	0	0
0.1	0	0	0	0	0	0	0	0	0	0	0.1	0	0	0	0	0
0.1	0	0	0	0	0	0	0	0	0	0	0.1	0	0	0	0.1	0
0.1	0	0	0	0	0	0	0	0	0	0	0	0	0	0	0	0
0.1	0	0	0	0	0	0	0.1	0	0	0	0.1	0	0.1	0	0.1	0
0	0	0	0	0	0	0	1.7	0	0	0	1	0	0.1	0	0.1	0.1
0	0.1	0	0	0	0	0	9.03	0	0.1	0.1	10.4	0	1	0	0	0
0.1	0.1	0	0.1	0	0.1	0	2.3	0.1	0.1	0.1	18.29	0	0.7	0	0.1	0
0.1	0.1	0	0	0.1	0.1	0	0.1	0	0	0	8.6	0	0.1	0	0.1	0.3
0.1	0	0	0	0	0	0	0.1	0	0	0	3.4	0	0.1	0.1	0.1	1.46
0.2	0	0	0	0	0	0	0.1	0	0	0	0.6	0.1	0.1	0.1	0.1	0.1
0.1	0.1	0	0	0	0	0	0.1	0	0	0	1.8	0	0.2	0	0.1	0.9
0.1	0	0	0	0	0	0	0	0	0	0	29.17	0	0.1	0.1	0.1	2.2
0.1	0	0	0	0	0	0	0	0	0	0	6.34	0	0.1	0.1	0	0.5
0.1	0	0	0	0	0	0	6.43	0.1	0	0	9.5	0	0.1	3.7	0	1.5
0.1	0	0	0	0	0.1	0	0.1	0.1	0	0	1.05	0	0.2	0.1	0.1	1
0.1	0.1	0	0.1	0	0.3	0	0	0.1	0	0	5.2	0	0.8	0	0	0.6
0.1	0.1	0.1	0	0.1	1.6	0	0	0.1	0	0	0.2	0	5.33	0.6	0.1	0.1
1.5	0.1	0	0	0.1	2.8	0	0.1	0	0	0	3.7	0.1	0.1	0.5	2.4	1.7
29.91	0.1	0	0	0.1	0.1	0	0.1	0	0	0	0.8	2.7	0.1	0.1	1	6.8
11.56	0.1	0.1	0	0.2	0.1	0	1.9	0.1	0	0	10.74	0.1	0	13.5	0.1	1.43
0.1	0.1	8.28	0	0.1	1.7	0	31.68	0.1	0	0	0.5	1.2	0.1	34.37	0.1	25.73
0.1	0	7	0	0.1	1.8	0	70.32	0	0	0	0.1	4.38	0.1	0.1	0.4	16.11
0.1	0.1	0	0	0.1	2.8	0	23.38	0	0	0	1.6	2.3	0.1	0.1	0.1	1
0.1	0.1	0	0	5.6	0.1	0.1	15.14	0	0	0	6.3	0	0.1	15.2	0.1	0.6
1.2	0	0	0	0	0.1	0	7.05	0	0	0	40.74	0.1	2.7	15.19	0.1	0.1
1	0	0	0	0	0	0.3	2.2	0	0	0	26.12	0.1	0.1	0.1	0.1	0.1
1.1	0	0	0	0	0.1	1.7	0.1	0	0	0	36.71	0.1	0	0	0.1	0
0.1	0	0	0	0	0	5.2	0.1	0	0	0	8.6	0	0	0	0.1	0
0.5	0	0	0	0	0	3.6	0	0	0	0	0.1	0.1	0	0	0.1	0
0.1	0.1	0	0	0	0	5.5	0	0	0	0	0.1	0.1	0	0	0.1	0
0.1	0.1	0	0	0	0.5	1.1	0	0	0	0	0.1	0.1	0	0	0.1	0
0.1	5.7	0	0	0.2	0.4	0.1	0	0	0	0	0.1	0.1	0	0	0.1	0
0.1	0	0	0	0.2	0.1	0.1	0	0	0	0	4.8	0	0.5	0.1	0.1	0.1
0.1	0	0	0	0.1	0	0.1	0.1	0	0	0	24.41	0.1	3.55	0	0.1	0.5
0.5	0	0	0	0	0	0.1	0	0	0	0	3	0	3.79	0	1.4	0
0.8	0	0	0	0	0	0.1	0.1	0	0	0	0.1	0	0.1	0.1	0.1	0
0.2	0	0	0	0	0	0.1	24.13	0	0	0	0.1	0	0.1	4.6	0.1	0
4.99	0	0	0	0	0	1.2	0.1	0	0	0	0.1	0	0	0.8	0.1	0.1
2.3	0	0	0	0	0	0.1	0	0	0	0	0.1	0	0.1	0	0.2	0
0.4	0	0	0	0	0	0.1	0	0	0	0	1	0.1	0.1	0	0.1	0
0.1	0	0	0	0	0	0.1	0	0	0	0	3.3	0	0.1	0	0.1	0
0.1	0	0	0	0	0	0.1	0.1	0	0	0	1.1	0	0.1	0	0.1	0
0.1	0	0	0	0	0	0.1	0.1	0	0	0	2.5	0	0	0.1	0.1	0
0.1	0	0	0	0	0	0.1	8.5	0	0	0	1.2	0	0	0.1	0.1	0.2
0.1	0	0	0	0	0	0.1	0.1	0	0	0	0.1	0	0	0.1	0.1	1.3
0.3	0	0	0	0	0.1	0.1	31.79	0	0	0	0.1	0.1	0	0	0.1	0.2
1	0	0	0	0	0.1	0.1	79.06	0	0	0	0.1	0	0.1	1.6	0.1	0.1
3.5	0	0	0	0	0.3	0.1	51.67	0	0	0	8.03	0.1	0.1	1.8	0.1	0.2
2	0	0	0	0	0.1	0.1	10.64	0	0	0	0.1	0.1	2.2	0.5	0.1	0.4
0.1	0	0	0	0	0.1	0.1	22.9	0	0.1	0.1	0.1	0.1	1.5	2.1	0.2	0.1
0.4	0	0	0	0	0.3	0.1	4.06	0.6	0	0	10.4	0.1	0.6	11.64	0.1	1.3
1	0	0	0	0	0.1	0.2	29.31	0.6	0	0	15.62	0.1	1.3	5.2	0.3	2.3
0.8	0	0.5	0	0	2.1	0.1	32.5	0.1	0	0	4	0.1	0.1	0.1	0.2	9.4
0.3	0	5.7	0	0	3.3	0.1	3.76	0.1	0.1	0.1	11.07	0.1	0	8.6	0.1	27.83
0.8	0.1	0.1	0.1	0	26.11	0.1	12.4	4.3	0.8	0.6	0.1	0.1	0.3	0	4.7	6.3
4.1	0.1	0.1	0.1	10.79	2.3	0.1	24.55	0	0.1	0.1	4.24	3	49.72	1.1	0.1	38.89
2.01	15.09	0.1	0.1	32.81	214.48	3.9	7.1	10.72	3.11	2.71	2	4.5	18.74	2.9	4.4	31.05
3.7	25.64	4.17	0.1	117.77	16.54	12.5	32.56	7.9	7.22	6.93	50.31	15.8	0.1	17.95	3.4	11.87
0.6	36.85	13.82	16.7	28.01	9	33.43	4	18.91	11.37	12.17	38.94	4.1	0.1	21.19	5.8	2.1
0.1	0.2	33.98	0.1	10.57	6	1.2	11.5	33.7	18.16	20.6	38.48	0.2	0.1	43.2	1.3	4.4
0.5	0	22.82	0	1.6	18.51	4	8.04	0.1	0.1	0.1	29.75	1.4	0.1	38.33	0.78	8.9
4.18	0	39.2	0	0.1	4.4	2.8	6.97	1.8	0.1	0.1	19.19	2.9	1.2	31.17	0.1	19.84
3	0	86.62	0	0.1	30.81	0.7	1.1	13.07	0	0	1.33	0.1	2.7	0.2	0.1	21.75
16.54	0.1	0.1	0	0.1	147.21	0.1	6	17.83	0	0	0.2	0.8	1	0.38	0.1	11.2
8.4	0	0.9	0	2.3	56.1	0.1	17.15	0.1	0	0	1.7	0.1	0.1	6.3	0.1	15.04
3.4	0	0.1	0.1	0.1	40.54	2.8	11.08	4.52	0.1	0.1	0.1	0.1	0.1	3.82	0.1	13.5
6.52	0.1	0.1	0.1	0.2	73.33	0.1	0.6	13.42	0.1	0.1	0.1	0.1	0.5	0.1	0.1	10.65
3	2.59	0.1	0	29.72	23.43	0.1	2.34	0.5	1	0.8	0.1	14.9	76.18	0.1	5.7	5.2
4.5	44.27	0.1	20.96	120.87	18.3	0.1	6.3	0.6	10.32	11.2	2.4	30.73	24.12	4.2	6	11.3
4.65	71.24	1.8	0.1	33.08	2.6	0.1	2.1	1.94	0.1	0.1	8.4	1	1.1	11.3	0.3	2.2
0.1	16.09	7.76	1.1	0.8	0.21	0.1	4.02	6.5	0.1	0.1	2.1	0.1	0.1	3.7	0.1	8.6
0.6	0.1	20.2	0.1	0.1	10.5	0.1	3.7	20.52	0.2	0.1	0.9	0.1	0.2	0.75	0.1	10.29
0.5	0.1	0.1	0	4.2	38.72	0.1	0.8	0.1	0.9	0.7	0.7	0.5	0.7	0.1	0.1	1
2.4	6.22	0.1	0.1	15.51	16.94	0.1	4.4	0.1	3.1	2.7	8.62	0.9	0.5	0.9	1.9	2
1.7	14.78	4.3	2.6	5.5	17.55	0.1	5.51	0.1	8.04	7.9	3.4	8.32	13.26	4.6	2.46	3.6
5.9	15.1	9.2	1.8	5.3	12.58	0.1	0.1	5.3	3.62	3.27	10.7	1	28.95	19.47	0.1	0.3
4	11.9	3.5	0	0.2	10.3	0.1	0.1	37.38	0.9	0.7	17.37	0.5	32.82	27.59	0.1	0.3
1.8	7.5	54.64	13.45	0.1	1.4	0.1	0.1	18.6	25.61	27.68	25.87	0.7	0.1	20.01	0.1	3
6.89	0.1	61.82	0.1	0.1	1.7	0.1	1.2	7.42	0.1	0.1	37.12	0.8	0.1	33.91	3.3	4
5	0	57.81	0	0.1	10	0.6	0.1	31.98	0.1	0.1	7.8	0.1	0.1	43.1	8.13	3.6
1.3	0.1	25.47	0	2.1	9.4	0.1	0.6	39.54	0.1	0.1	0.1	0.1	42.29	1.3	11.6	0.1
4.5	0.2	0.1	0.1	12.9	0.8	0.1	1.4	9.1	2.4	1.88	0.1	36.14	45.38	0.1	36.03	0.1
1.7	1.7	0.1	0.1	7.93	0.1	14.42	0.1	0.1	1.7	1.4	0.1	48.37	6.8	6.3	12.3	0.1
1	0.1	0.1	3.4	0.1	0.1	31.73	1.8	0.1	0.1	0.1	20.95	1.51	0.1	0.1	1.4	0.2
0.2	0.4	3.3	0	0.1	0.1	0.1	20.08	1	0.1	0.1	15.1	0.1	0.1	8.5	0.1	0.2
0.1	0	44.5	0	0	2.3	0.1	8.35	4.7	0	0	47.25	0.1	0.1	39.59	0.1	3.2
0.1	0	1.6	0	0.1	3.3	0.1	4.3	0.4	0	0	288.78	0.1	0.1	107.99	0.1	11.56
0.8	0	8.81	0	0.1	1.1	0.1	0.1	0	0	0	40.09	0.1	2.6	87.28	10.5	9.2
8	0	49.14	0	0.1	7	0.1	0.1	0.1	0	0	19.7	0.5	0.1	45.8	10.36	0.4
7.75	0	49.83	0	0	2.7	0.1	0.6	1.3	0	0	0.1	0.1	1.2	43.17	22.67	1.4
1.1	0.1	4.3	0	8.8	2.9	0.1	0.1	10.85	0	0	2	0.7	40.02	0.7	10.4	0.1
5.35	2.9	0.1	0.8	6.5	0.5	1.4	0.1	2.8	2.6	2.03	5	31.55	10.3	0.9	16.92	0.1
7.9	0.3	0.3	3.7	3.3	0.1	0.1	0.1	0.1	4.85	4.43	4.02	13.2	47.94	0.1	10.13	0.1
11.47	4.5	1.3	8.21	2.2	0.1	9.51	0.1	0.9	2.6	2	8.9	20.81	9.2	5.5	1.2	0.1
0.3	7.32	7.6	26.12	14.86	0.8	12.6	0.1	4.7	10.6	11.36	10.22	1.4	0.1	14	0.2	0.2
0.3	3.67	16.48	54.5	1.1	0.1	1.7	0.1	6.89	81.21	73.9	12.45	1	0.1	11	0.8	1.3
1.8	0.1	30.69	0.1	0.1	0.1	0.1	15.32	4.7	0.1	0.1	39.64	0.1	6.2	18.2	1.4	9.4
3.2	0	5.8	0	0.1	0.7	0.1	1.7	1.9	0.1	0.1	44.19	0.1	4.9	69.69	15.92	6.04
11.36	0.1	30.84	0	0.1	0.1	0.1	3.9	2.6	0.1	0.1	14.39	0.4	17.19	52.48	12.36	10.65
16.78	0.1	34.18	0	0.1	24.2	0.1	0.8	18.66	0	0	9.08	3.5	15.47	15.7	14.33	10.5
28.32	12.56	1.5	0.48	15.74	44.51	0.2	1.6	9.73	4.5	4.12	7.93	3.5	22.89	1.9	54.07	1
19.86	3.8	0.1	1	20.52	2.8	13.46	0.1	0.1	1.9	1.5	0.1	12.01	59.19	0.7	56.17	0.8
27.81	0.1	0.1	0	8.54	2.4	45.84	0.1	0.1	0	0	0.1	25.89	21.77	0.1	24.46	0.1
14.27	1.7	0.1	4.3	19.4	4.6	3.6	0.1	0.1	0.2	0.2	2.1	12.75	19.88	0.1	6.15	0.1
27.98	25.37	0.1	23.51	15.74	0.4	12.23	0.1	0.1	6.51	6.23	0.1	22.43	17.07	0.1	60.94	0.1
22.29	15.42	0	3.2	15.6	0.1	58.25	0.1	0.1	2.5	2	1.35	18	33.1	0.1	16.97	0.1
4.95	15.42	0.1	0.1	14.79	0.7	6.7	2.7	0.4	0.1	0.1	0.3	7.9	23.36	0.6	9.99	0.1
12.58	12	0.1	0.2	11.4	0.7	4.36	1.9	0.1	3.9	3.5	2.9	11.64	5.2	0.1	19.7	0.1
3.63	0.2	0	2.2	19.28	0.1	16.38	1.3	0	5.4	5.1	0.94	45.28	42.15	0.1	24.53	0.1
3.56	0.1	0	0	29.71	28.83	21.3	2.3	0.1	0.1	0.1	0.1	46.22	35.95	0.1	11.19	0.9
10.3	0.4	0.1	0.1	157.82	18.33	34.42	1.8	1.1	0.1	0.1	0.1	2.1	3.8	0.1	29.28	2.7
3	40.11	0.1	0.1	32.58	1.84	20.6	0.2	0.1	0.1	0.1	0.1	1.51	0.1	0.1	1.1	0.1
0.1	0.4	0.1	0.1	0.6	11.01	92.95	0.1	0.3	0.1	0.1	0.5	1.2	0.6	0.1	0.2	0.1
0.5	0.1	0.5	0.1	0.1	7.23	19.79	0.1	9.31	0.1	0.1	0.1	1.1	0.1	1.7	10.15	0.1
0.7	4.36	0	0.1	4	13.7	4.36	0.1	2.29	24.57	26.46	1.6	0.8	0.1	0	0.1	0.2
1.3	6.7	0	26.68	6.71	12.82	1.68	0.1	4.1	68.54	64.97	3.5	0.4	1.14	1.4	0.6	1.3
0.1	8.35	0.1	21.37	2.5	12.5	3.7	0.1	9.1	41.28	47.32	0.1	0.3	0.1	5.6	0.1	0.8
0.6	5.9	2	16.7	7.55	7.2	0.7	0.1	0.2	0.1	0.1	0.1	0.1	1.12	0.1	0.5	3.4
4	6.8	0.6	0.1	10.09	4.1	2.1	2.1	0.1	10.76	11.4	0.1	0.1	15.8	0.1	1.8	4.74
8.01	5.96	0	4.8	11.7	40.98	2.3	1.2	0	39.59	45.93	0.1	0.1	3.38	0.9	4.7	12.2
10.3	0.5	0.1	26.84	21.95	24.2	0.1	2	0.1	79.98	72.82	0.1	0.1	0.4	0.5	5.1	2
3.2	5.69	0.2	0.5	15.25	7.2	0.1	0.2	0.1	0.1	0.1	1.3	0.8	0.1	0.3	0.5	0.7
0.4	5	0.8	0.1	0.1	3	0.1	6.3	1.7	7.02	6.88	8.5	0.1	0.1	0.1	3.2	0.4
1.96	1.05	3.39	0.1	0.1	4.2	0.1	6	0.1	0.1	0.1	29.07	0.1	0.1	3.09	0.9	1.2
0.3	0.1	29.58	0	0.1	1.87	0.1	7.4	0.6	0.1	0.1	55.25	0.1	0.1	16.65	5.4	8.1
4.5	0	203.16	0	0.1	0.6	0.2	0.2	0.1	0	0	22.86	0.1	0.1	51.27	2.9	6.6
5.44	0	76.43	0	0.1	11.21	0.4	0.1	1.7	0	0	0.4	0.1	0.1	8.6	3	4.7
8.83	0	0.7	0	0.1	28.59	1.4	0.1	13.5	0.1	0.1	0.1	0.1	0.1	0.1	0.1	0.3
4.3	0.1	0.1	0	3.3	15.48	0.1	0.6	0.1	0	0	0.1	0.6	10.04	0.1	0.1	0.7
8.5	0.1	1.1	0	36.72	29.55	0.1	0.1	9.72	0	0	1.3	0.1	1.18	0.2	0.1	0.1
2.7	16.84	3.6	0.1	94.92	3.8	0.4	0.1	20.48	4.9	4.6	0.1	13.79	0.1	0.1	0.1	0.1
0.1	50.33	19.24	0.4	11.7	0.2	1.68	0.1	8.09	14.12	16.01	0.9	0.2	17.95	6.4	0.1	0.1
0.1	1.9	7.24	0.1	0.1	3.9	0.1	0.5	6.9	0.1	0.1	4.5	0.1	0.9	7.4	0.1	6.5
0.1	4.99	19.82	5.59	0.1	6.81	0.1	1.4	3.24	0	0	7.8	0.1	4.5	10.7	0.1	0.1
1.39	0.1	18.5	0.1	0.1	8.88	0.3	0.4	11.04	0.1	0.1	28.01	0.1	3.1	29.63	0.1	0.1
2.2	0	14.8	3.7	0.1	44.7	0.2	0.5	55.84	0.5	0.4	3.9	0.1	0.1	7.63	0.1	1.1
0.7	7.35	18.46	9.3	8	28.53	0.5	0.3	32.66	1.6	1.2	4.7	0.1	0.1	10.38	0.1	6.57
0.1	3.18	86.64	0	9.07	12.72	0.3	15.1	10.06	0.1	0.1	19.4	0.1	0.1	31.87	0.1	1.5
0.1	0.1	46.67	0.4	0.1	8.13	1.1	14.9	9.31	0.1	0.1	42.61	0.1	0.1	58.66	0.1	6.8
0.1	0.1	36.33	0	0	3.4	0.1	15.7	6.5	0	0	29.65	0.1	0.1	71.39	0.1	36.66
0.1	0.1	22.24	0	0.1	3.73	0.1	4.3	11.48	0.1	0.1	2.6	0.1	1.1	3.5	0.1	55.16
0.1	0.1	47.86	0	0.1	10.6	0.1	0.1	0.1	1	0.8	0.1	0.1	11	8.05	0.1	26.93
0.1	0.1	49.88	0	0.1	6	0.1	0.1	27.09	0	0	0.1	0.6	39.07	0.1	0.1	0.8
0.1	0.9	11.7	0	2.14	9.13	0	0.1	29.95	0.1	0.1	0.1	0.6	42.06	0.1	0.1	0.1
0.1	1.8	7.85	0.1	4.4	11.3	0.1	0.1	21.4	0.1	0.1	0.1	2.7	22.28	0.1	0.1	0.1
0.1	0.1	1	0	0.1	23.25	0.1	0.1	46.47	0.1	0.1	0.1	0.5	18.74	0.1	0.1	0.1
0.1	0.1	9.25	0	0.1	14.09	0	0	13.14	0	0	0.5	0.1	1	0.43	0.1	0.1
0.1	0	36.43	0	0.1	2.7	0	0.1	5.1	0	0	0.1	0.1	3.6	0.1	0.1	1.9
0.7	0.1	6.9	0	0.1	7.2	0	0.1	13.13	0	0	0.1	0.7	8.73	0.1	5.8	0.5
1.8	0	2.4	0.1	0.1	0.8	0	0	2.5	0	0	0.1	0.1	11.91	0.1	33.86	0.1
0.4	0.1	0.1	0	3	0.3	0	0.1	0.1	0	0	0.2	11.22	0.4	0.1	28.14	0.1
0.1	0.1	0.1	0	0.1	3	0	1.4	0.1	0	0	0.1	0.1	0.1	0.1	0.1	0.1
0.5	0.1	0	0.1	0.1	0.5	0	0.2	0	0.1	0.1	0.1	1.3	0.1	0.1	0.2	0.2
3.9	0.1	0	0.1	0.1	0.6	0	0.8	0	0.1	0.1	0.1	1.1	0.8	0.1	5.43	1.2
9.88	0	18.6	0.5	0.1	95.26	0	12.4	13.21	0.1	0.1	0.1	0.1	54.18	0.3	0.1	5.3
0.8	3.5	37.68	13.52	2.2	104.13	0.1	17.29	62.91	0.2	0.2	4.64	0.1	0.1	0.9	0.1	7.2
1.6	0.1	32.53	0.48	0.27	2.3	0	4.8	40.4	0	0	0.9	0.1	0.1	11.2	0.1	15.99
0.3	0	4.56	0	0.1	2.8	0.1	0.2	12.97	0	0	0.1	0	0.1	0.1	0.1	6.5
0.1	0	0.1	0	0	16.94	0.1	0.1	16.2	0.1	0.1	0.1	0	0.1	0.1	0.1	0.1
0.1	0	0	0	0	6.15	0.1	0.1	12.8	0.1	0.1	0.1	0	0.1	0.1	0.1	0.1
0.1	0	0.1	0	0	0.9	0.1	0.1	12	0	0	0.1	0	1.5	0.1	0.1	0.1
0.1	0	0.1	0	0	3.01	0.1	0	5.6	0	0	0.1	0	0.1	6.2	0.1	0.1
0.1	0.1	9.29	0.1	0.1	8.13	0.1	0.3	0.1	0	0	0.1	0	0.1	0.1	0.1	3.4
0.1	0	21.3	0	0.1	88.06	0	0.1	17.74	0	0	0.1	0.1	0.1	0.1	0.1	0.5
0.1	0	10.3	0	0.1	39.83	0	0.1	33.56	0	0	0.1	0.1	0	0.1	0.1	0.5
0.1	0	23.85	0	0	20.07	0	0.1	8.79	0	0	0.1	0.1	0	0.1	0.1	0.5
0.1	0	5.88	0	0	32.06	0	0.1	8.53	0	0	0.1	0	0	0.5	0.1	3.7
0.1	0	0.8	0	0	34.63	0	0.1	0.5	0	0	1.2	0	0.1	4.2	0.1	0.3
0.1	0	5.3	0	0	35.85	0.1	0.1	5.7	0	0	0.1	0	0.1	4.6	0.1	0.1
0.1	0.1	14.89	0	0.1	48.24	0	1	1.1	0	0	0.1	0	0.1	16.51	0.1	0.1
0.1	0.1	28.02	0	0.1	32.71	0	3.2	1.5	0	0	4.9	0.1	0.1	11.61	0.1	0.1
0.1	0	21.85	0	0	1.1	0	0.8	0.1	0	0	34.93	0.1	0.1	51.27	0.1	9
0.1	0	0	0	0	0.1	0	7.56	0	0	0	44.83	0	0.1	32.03	0.1	1.5
0.1	0	0	0	0	0	0	0.1	0	0	0	7.38	0	0	0	0.1	0.1
0.1	0	0	0	0	0	0	0.1	0	0	0	0	0	0.1	0.1	0.1	0.1
1.8	0.1	0	0	0	0	0	0.4	0	0	0	0	0.1	0.1	0.1	0.1	0.1
2.7	0	0	0	0	0	0	0.1	0	0	0	0	0.1	0	0.8	0.1	0.1
0.1	0	0	0	0	0	0	9.71	0	0	0	0	0	0	0.2	0.1	0.1
0.1	0	0	0	0	0	0	0.8	0	0	0	0	0	0	0.1	0	0.1
0.3	0	0	0	0	0.1	0	4.5	0	0	0	0	0	0	0	0.1	2.1
8.47	0	0	0	0	0.1	0	7.2	0	0	0	0.1	0.1	0.1	0.1	0.1	2.4
27.52	0	8.3	0	0.1	2.1	0	28.19	0.1	0.1	0.1	2.3	0.1	0.2	3.3	0.1	15.6
5.18	0.1	24.34	0	0	6.2	0	21.2	0.1	0.1	0.1	13.78	0.1	0.1	31.81	0.1	33.28
2.2	0	15.1	0	0	1.2	0	0.4	0.1	0	0	4.5	0	0.1	33.28	0.1	27.98
2.2	0	4.44	0	0	0.1	0	0.1	0.1	0	0	0.1	0	5.65	9.8	0.1	7.62
0.1	0	1.2	0	0	0.6	0	0	0	0	0	0	0	13.2	3.3	12.3	0.5
0.1	0	0.1	0	0	0.1	0	0	0	0	0	0	0	0.7	0.1	3.3	2.4
1.7	0	0	0	0	0.1	0	0	0	0	0	0	0	0.1	0.1	0.4	3.03
2.4	0	0	0	0	0.1	0	0	0	0	0	0	0	0	0	0.1	0.1
0.1	0	0	0	0	0	0	0	0	0	0	0	0	0	0	0	0
0	0	0	0	0	0	0	17.17	0	0	0	1.5	0	0	0.1	0	0.1
0	0	0	0	0	0	0	49.8	0	0	0	9	0	0	20.51	0	22.08
0.1	0	0	0	0	0	0	12.6	0	0	0	38.31	0	0	11	0.1	0.5
0	0	0	0	0	0	0	0	0	0	0	0.1	0	0	0.1	0.1	0
0	0	0	0	0	0	0	0.1	0	0	0	0.1	0	0	0	0	0
0	0	0	0	0	0	0	0	0	0	0	0	0	0	0	0	0
0	0	0	0	0	0	0	0	0	0	0	0	0	0	0	0	0
0	0	0	0	0	0	0	3.4	0	0	0	0	0	0	0	0	0
0	0	0	0	0	0	0	3.5	0	0	0	0	0	0	0	0	0.1
0	0	0	0	0	0	0	0.7	0	0	0	0	0	0.1	0	0	0.1
0.1	0	0	0	0	0	0	0.1	0	0	0	0	0	0.1	0	0.1	0.1
0.1	0	0	0	0	0.1	0	0	0	0	0	0	0.1	0.1	0	0.1	0.1
6.6	0	0	0	0.1	0.1	0	0	0	0	0	0	0	0.1	0	0.1	0
0.1	0	0	0	0	0.1	0	0	0	0	0	0	0.1	0.1	0	0.1	0
0.1	0	0	0	0	0.1	0	0	0	0	0	0	0	0	0	0.1	0
0.1	0	0	0	0	0	0	0	0	0	0	0	0	0	0	0	0
0.1	0	0	0	0	0	0	0	0	0	0	0	0	0	0	0	0
0.1	0	0	0	0	0.1	0	0.1	0	0	0	0	0.1	0.1	0	0	1
0.1	0	0	0	0.1	0.1	0	0	0	0	0	0.1	0.1	2.5	0.1	0.1	2.4
2	0	0.1	0	1	4.3	0.1	0.1	0	0	0	0.1	0.1	11.11	0.1	0.1	0.1
0.9	0.1	0.7	0	0.9	7	0.1	0	0.1	0	0	0	0.1	1.64	0.1	0.2	0
0.2	0.1	0	0.1	0.1	0.1	0.1	0	0	0.1	0.1	0	0.1	0.1	0.1	0.1	0
0.1	0	0	0	0	0	0.1	0	0	0	0	0	0.8	0.1	0	0.1	0
0.1	0	0	0	0	0	0.1	0	0	0	0	0	0.1	0	0	0.1	0
0.1	0	0	0.1	0	0	0	0.5	0	0.1	0.1	0	0	0	0	0	0.1
0	0	0	0	0	0.1	0	10.41	0	0	0	1.7	0	0	4.5	0	15.34
0	0	0	0	0	0.1	0	28.01	0	0	0	2.2	0	0	0.8	0	3.5
0	0	0	0	0	0	0	3.76	0	0	0	0.1	0	0	0.1	0	2.8
0	0.1	0	0	0	0.1	0.1	0.3	0	0	0	0	0.1	0	0.1	0.1	1.7
0	0	1.7	0	0	0.1	0.1	5.55	0.1	0	0	0.1	0.1	0	0.2	0.1	4.3
0	0	0.1	0	0	0	0.1	0.2	0	0	0	0.1	0	0	1.9	0	0.1
0.1	0	0	0	0	0	0	0.1	0	0	0	0	0	0.1	0.1	0	0.1
0.1	0	0	0	0	0	0	0	0	0	0	0	0	0	0	0	0.1
0	0	0	0	0	0	0	0	0	0	0	0	0	0	0	0	0
0	0	0	0	0	0	0	0	0	0	0	0	0	0	0	0	0
0	0	0	0	0	0	0	8.6	0	0	0	0	0	0	0	0	7.53
0.1	0	0	0	0	0.1	0	15.75	0	0	0	0.1	0	0	0	0	9.6
0.1	0.7	0	5.39	0.1	7.23	0	27.3	0.6	0.2	0.1	0.1	0.1	0.1	0.1	0.1	3.4
0.1	0.1	39.19	52.31	0.3	1.4	0	23.73	39.92	49.46	54.91	0.4	0.1	0.1	11.14	0.1	12.3
0.1	0.1	0.3	0.4	0	0.1	0	15.3	0.1	3.1	2.6	3.1	0.1	0	16.3	0	4.67
0.1	0.1	0	0	0	0	0	0.3	0	0.1	0.1	0.1	0	0.1	0	0	0.1
0.1	0	0	0	0	0	0	0	0	0	0	0	0	0	0	0	0
0	0	0	0	0	0	0	0	0	0	0	0	0	0	0	0	0
0	0	0	0	0	0	0	0	0	0	0	0	0	0	0	0	0
0	0	0	0	0	0	0	0	0	0	0	0	0	0	0	0	0
0	0	0	0	0	0	0	0	0	0	0	0	0	0	0	0	0
0	0	0	0	0	0	0	0.1	0	0	0	0	0	0	0	0	0.1
0	0	0	0	0	0	0	0	0	0	0	0	0	0	0	0.1	0
0	0	0	0	0	0	0	0	0	0	0	0	0	0	0	0	0
0.1	0	0	0	0	0	0	0	0	0	0	0	0	0	0	0	0
0	0	0	0	0	0	0	0	0	0	0	0	0	0	0	0	0
0.1	0	0	0	0	0	0	0	0	0	0	0	0	0.1	0	0	0
0.1	0	0	0	0	0	0	0	0	0	0	0	0.1	0.4	0	0.1	0.1
2.2	0	0	0	0	0.1	0	0.1	0	0	0	0	0.1	1.3	0	0.1	0
1.9	0	0	0	0	0	0	0.1	0	0	0	0	0.1	0.1	0	0.1	0
0.1	0	0	0.1	0	0	0	0	0	0.1	0.1	0	0.1	0	0	0.1	0
0	0	0	0.1	0	0	0	0	0	0.1	0.1	0.1	0	0	0	0	0
0	0	0	0	0	0	0	0	0	0	0	0.1	0	0	0	0	0
0	0	0	0	0	0	0	0	0	0	0	0	0	0	0	0	0
0	0	0	0.1	0	0	0	0	0	0.1	0.1	0	0	0	0	0	0
0	0	0	0	0	0	0	0	0	0	0	0	0	0	0	0	0
0	0	0	0	0	0	0	0	0	0.1	0.1	0	0	0	0	0	0
0	0	0	0	0	0	0	0	0	0.1	0.1	0	0	0	0	0	0
0	0	0	0	0	0	0	0	0	0	0	0	0	0	0	0	0
0	0	0	0	0	0	0	0	0	0	0	0	0	0	0	0	0
0	0	0	0	0	0	0	0	0	0	0	0	0	0	0	0	0
0	0	0	0	0	0	0	0	0	0	0	0	0	0	0	0	0
0	0	0	0	0	0	0	0	0	0	0	0	0	0	0	0	0
0	0	0	0	0	0	0	0	0	0	0	0	0	0	0	0	0
0	0	0	0	0	0	0	0	0	0	0	0	0	0	0	0	0
0	0	0	0	0	0	0	0	0	0	0	0	0	0	0	0	0
0	0	0	0	0	0	0	0	0	0	0	0	0	0	0	0	0
0	0	0	0	0	0	0	0	0	0	0	0	0	0	0	0	0
0	0	0	0	0	0	0	0	0	0	0	0	0	0	0	0	0
0	0	0	0	0	0	0	0	0	0	0	0	0	0	0	0	0
0	0	0	0	0	0	0	0	0	0	0	0	0	0	0	0	0
0	0	0	0	0	0	0	0	0	0	0	0	0	0	0	0	0
0.1	0	0	0	0	0	0	0	0	0.1	0.1	0	0	0	0	0	0
0	0	0	0	0	0	0	0	0	0	0	0	0	0	0	0	0
0	0	0	0	0	0	0	0	0	0.1	0.1	0	0	0	0	0	0
0	0	0	0	0	0	0	0	0	0	0	0	0	0	0	0	0
0	0	0	0	0	0	0	0	0	0	0	0	0	0	0	0	0
0	0	0	0.1	0	0	0	0	0	0.1	0.1	0	0	0	0	0	0
0	0	0	0	0	0	0	0	0	0	0	0	0	0	0	0	0
0	0	0	2.3	0	0	0	0	0	0.3	0.3	0	0	0	0	0	0
0	0	0	0	0	0	0	0	0	0.1	0.1	0	0	0	0	0	0
0	0	0	0.1	0	0	0	0	0	0.1	0.1	0	0	0	0	0	0
0	0.1	0	12.87	0	0	0	0	0	8.4	8.2	0	0	0	0	0	0
0	0	0	0.1	0	0	0	0	0	0.1	0.1	0	0	0	0	0	0
0	0	0	0	0	0	0	0	0	0	0	0	0	0	0	0	0
0	0	0	0	0	0.1	0	0	0.1	0	0	0	0	0	0	0	0
0	0	6.6	0	0	0	0	0	0.1	0	0	0.1	0	0	0.1	0	0.2
0	0	0	0	0	0	0	0.1	0	0	0	0	0	0	0	0	0.1
0	0	0	0	0	0	0	0	0	0	0	0	0	0	0	0	0
0	0	0	0	0	0	0	0	0	0	0	0	0	0	0	0	0
0	0	0	0	0	0	0	0	0	0	0	0	0	0	0	0	0
0	0	0	0	0	0	0	0	0	0	0	0	0	0	0	0	0
0	0	0	0	0	0	0	0	0	0	0	0	0	0	0	0	0
0	0	0	0	0	0	0	0	0	0	0	0	0	0	0	0	0
0	0	0	0	0	0	0	0	0	0	0	0	0	0	0	0	0
0	0	0	0	0	0	0	0	0	0	0	0	0	0	0	0	0
0	0	0	0	0	0	0	0	0	0	0	0	0	0	0	0	0
0	0	0	14.5	0	0	0	0	0	11.6	12.33	0	0	0	0	0	0
0	0	0	0	0	0	0	0	0	0.1	0.1	0	0	0	0	0	0
0.1	0	0	0	0	0	0	0	0	0	0	0	0	0	0	0	0
0.1	0	0	0	0	0	0	0	0	0	0	0	0	0.1	0	0	0
0.3	0	0	0	0	0	0	0	0	0	0	0	0	0.1	0	0.1	0.1
0.1	0	0	0	0	0	0	0	0	0	0	0	0	0.1	0	0.1	0
0.1	0	0	0	0	0	0	0	0	0	0	0	0	0.1	0	0.1	0
0	0	0	0	0	0	0	0	0	0	0	0	0	0	0	0	0
0	0	0	0	0	0	0	0	0	0	0	0	0	0	0	0	0
0	0	0	0	0	0	0	0	0	0	0	0	0	0	0	0	0
0	0	0	0	0	0	0	0	0	0	0	0	0	0	0	0	0
0	0	0	0	0	0	0	0	0	0	0	0	0	0	0	0	0
0	0	0	0	0	0	0	0	0	0	0	0	0	0	0	0	0
0	0	0	0	0	0	0	0	0	0	0	0	0	0	0	0	0
0	0	0	0	0	0	0	0	0	0	0	0	0	0	0	0	0
0	0	0	0	0	0	0	0	0	0	0	0	0	0	0	0	0
0	0	0	0	0	0	0	0	0	0	0	0	0	0	0	0	0
0	0	0	0	0	0	0	0	0	0	0	0	0	0	0	0	0
0	0	0	0	0	0	0	0	0	0	0	0	0	0	0	0	0
0	0	0	0	0	0	0	0	0	0	0	0	0	0	0	0	0
0	0	0	0	0	0	0	0	0	0	0	0	0	0	0	0	0
0	0	0	0	0	0	0	0	0	0	0	0	0	0	0	0	0
0	0	0	0	0	0	0	0	0	0	0	0	0	0	0	0	0
0	0	0	0	0	0	0	0	0	0.1	0.1	0	0	0	0	0	0
0	0	0	0	0	0	0	0	0	0	0	0	0	0	0	0	0
0	0	0.53	0	0	0.1	0	0	0.1	0	0	0	0	0	0.1	0	0.1
0	0	0	0	0	0	0	0	0	0	0	0.1	0	0	0.1	0	0.1
0	0	0	0	0	0	0	0.1	0	0	0	0	0	0	0	0	0.1
0	0	0	0	0	0	0	0	0	0.1	0.1	0	0	0	0	0	0
0.1	0	0	0	0	0	0	0	0	0	0	0	0	0	0	0	0
0.1	0	0	0.1	0	0	0	0	0	0.1	0.1	0	0	0	0	0	0
0.1	0	0	0	0	0	0	0	0	0	0	0	0	0.1	0	0.1	0
0	0	0	0	0	0	0	0	0	0.1	0.1	0	0	0	0	0.1	0
0	0	0	0	0	0	0	0	0	0	0	0	0	0	0	0	0
0	0	0	0	0	0	0	0	0	0	0	0	0	0	0	0.1	0
0	0	0	0	0	0	0	0	0	0	0	0	0	0	0	0.1	0
0.1	0	0	0	0	0	0	0	0	0.1	0.1	0	0.1	0	0	0.1	0
0.1	0	0	0.1	0	0	0	0	0	0.1	0.1	0	0	0.1	0	0.1	0
0	0.1	0	0.2	0	0.1	0	0	0	0.1	0.1	0	0	0.1	0	0.1	0
0	0	1.1	0	0	0.1	0	0	0.1	0	0	0.1	0	0.1	0.1	0.1	0.7
0	0	0.1	0	0	0.1	0	1.9	0	0	0	0.1	0	0.1	0.2	0.1	0.1
0.1	0	0	0	0	0	0	0	0	0	0	0.1	0	0	0.1	0	0.6
0.1	0	0	0	0	0	0	4.6	0	0	0	0	0	0	0	0.1	0.1
0.1	0	0	0	0	0	0	0	0	0	0	0	0	0	0	0	0
0	0	0	0	0	0	0	0	0	0	0	0	0	0	0	0	0
0	0	0	0	0	0	0	0	0	0	0	0	0	0	0	0	0
0	0	0	0	0	0	0	0	0	0	0	0	0	0	0	0	0
0	0	0	0.1	0	0	0	0	0	0.1	0.1	0	0	0	0	0	0
0.1	0	0	0	0	0	0	0	0.1	0	0	0	0	0	0	0.1	0
0.1	0	0.1	0	0	0	0	0	0.1	0	0	0	0	0	0	0.1	0
0.1	0	0	0	0	0	0	0	0	0	0	0	0.1	0.1	0	0.1	0
0.1	0	0	0	0.1	0	0	0	0	0	0	0	0.1	0.4	0	0.1	0
0.5	0	0	0	0	0	0	0	0	0	0	0	0	0.1	0	0.1	0
0.1	0	0	0	0	0	0	0	0	0	0	0	0	0	0	0	0
0.1	0	0	0	0	0	0	0	0	0	0	0	0	0	0	0	0
0	0	0	0	0	0	0	0	0	0	0	0	0	0	0	0	0
0	0	0	0	0	0	0	0	0	0	0	0.1	0	0	0	0	0
0.1	0	0	0	0	0	0	0	0	0.1	0.1	0.1	0	0	0	0	0
0.1	0	0	0.1	0	0	0	0	0	0.1	0.1	0.1	0	0	0	0	0
0.1	0	0	0	0	0	0	0	0	0	0	0.9	0	0	0	0.1	0.1
0.1	0	0	0	0	0	0	0	0	0	0	1.7	0	0.1	0	0.1	0.1
0.1	0	0	0	0	0	0	0.1	0	0	0	0.2	0	0	0	0.1	0
0.1	0	0	0	0	0	0	0	0	0	0	0	0	0	0	0.1	0
0.1	0	0	0.1	0	0	0	0	0	0.1	0.1	0.1	0	0	0	0.1	0
0.1	0.1	0	0.1	0	0	0	0	0.1	0.1	0.1	1.8	0	0	0	0.1	0.1
0.1	0.1	0	0.1	0.1	0	0	0.33	0	0.1	0.1	13.53	0.1	0.1	0.1	0.1	1.8
0.1	0.1	0	0	0.1	0.1	0.1	0.2	0	0	0	17.96	0.1	0.1	0	0.1	0
0.3	0.1	0	1	0.1	0	0	5	0	0.1	0.1	10.8	0.4	0.1	0	0.2	0.1
0.1	0.1	0	0.4	0.8	0.1	0	4.3	0.1	0.1	0.1	2.9	0.1	0.1	0.6	0.1	0.9
0.1	0	0.1	0	0.1	0.1	0	10.9	0.1	0.3	0.3	2.1	0.1	0	0.1	0.4	0.1
0.1	0.1	0	0	0	0	0	10.44	0	0	0	0.1	0.1	0.1	0	0.1	4.9
0.21	0	0	0	0	0	0	4.3	0	0	0	1.7	0	0.1	0	0.1	4.3
0.1	0	0	0	0	0	0	10.68	0	0	0	6.1	0	0	0	0	0.1
0	0	0	0	0	0	0	3.25	0	0	0	1.1	0	0	0	0	0
0.1	0	0	0	0	0	0	1.2	0	0	0	5.6	0	0	0	0.1	0
0.1	0.1	0	0	0.1	0	0	0.3	0	0	0	0.1	0	0	0	0.1	0
0.1	0.1	0	0	0.1	0	0	0.1	0	0	0	0.1	0	0.1	0	0.1	0
0.4	0	0	0	0.1	0	0	0.1	0.1	0	0	8	3.28	0	0	0.1	0.1
0.1	0	0	0	0.1	0.1	0	1.4	0.1	0	0	16.25	0.1	0	0.1	0	1.8
0.4	0	0	0	0	0	0	9	0.1	0	0	15.1	0.1	0	0	0.1	2.6
0.4	0	0	0	0	0	0	1.5	0	0	0	0.2	0.1	0.1	0	4.87	0.1
0.5	0	0	0	0	0	0	0.5	0	0	0	0.1	0	0.1	0	0.5	0
0.5	0	0	0	0	0	0	0	0	0	0	0.1	0	0.1	0	0.1	0
0.1	0	0	0	0	0	0	0	0	0	0	0.1	0	0	0	0	0
0.1	0	0	0	0	0	0	0	0	0	0	0.1	0	0	0	0	0
0.1	0.1	0	0	0	0	0	0.1	0	0.1	0.1	0.1	0	0.1	0	0	0
0.1	0.1	0	0.1	0	0.1	0	0.3	0	0	0	8.2	0.1	0.1	0.1	0	0.2
0.1	0.1	0	0	0	0.1	0	1.95	0	0	0	49.51	0	0.1	0.2	0.1	0.3
0.1	0	0	0	0	0	0	0.6	0	0	0	43.06	0.1	0.7	0.9	0.1	2.7
0.1	0.1	0	0.1	0.1	0.1	0	0.1	0.1	0.1	0.1	0.1	0.1	10.11	0	1.1	0.1
0.1	0.1	0	0	0	0.1	0	0.1	0	0.1	0.1	0.9	0.1	0.3	0	0.1	2.8
0.1	0	0	0	0.1	0.1	0	0.6	0	0.1	0.1	0.1	1	0.8	0	0.1	0.1
0.1	0.1	0	0	2.2	0.1	0.1	0.1	0	0.1	0.1	7.7	0.9	5.39	0	0.7	0.1
0.9	0	0.1	0	0.1	0.1	0	0	0.1	0	0	1.6	4.5	1.2	0	1.4	0
0.1	0	0	0	1.1	0.3	0.1	0	0	0	0	0.1	1.9	0.4	0	0.1	0.1
0.1	0	0	0	0	0.1	0	2.8	0	0	0	0.1	2.5	7.4	0	0.1	0.1
0.1	0	0	0	0	0.1	0.1	0	0	0	0	0.1	7.4	0.1	0	1.1	0.1
0.1	1.1	0	0.1	0.3	0.1	0	0	0	0.1	0.1	0.1	0.1	0	0	0.1	0
0.1	0.1	0	3.1	4.16	0.1	0	0	0.1	0	0	0.1	0.1	0.1	0	0.1	0
0.1	0.2	0	0	1.9	0.1	0	0	0	0	0	0.1	1.5	1	0	0.2	0
1	0	0.1	0.1	0.1	0.1	0	0.1	0	0.1	0.1	0.1	1.7	0.9	0	1.3	0.1
0.1	0	0	0	0	0.1	0	0	0	0	0	0	0.1	1.3	0	0.1	0
0.1	0.1	0	0	0	0.1	0.1	0	0	0	0	0.1	0	1.18	0	0.1	0
0.3	0	0	0	0	0.1	0.1	0	0	0	0	0.1	0.1	0.6	0	0.1	0.1
0.1	0	0	0	0	0.1	0.1	0.1	0	0.1	0.1	2.16	0.1	0.1	0.1	0.1	0
0.1	0.1	0	0	0.1	1.1	0.1	0.1	0	0.1	0.1	19.59	0	0	0	0.1	0
0.1	0.1	0	0	0.1	0.1	0.1	0	0	0	0	9	0	0.1	0	0	0.1
0.1	0	0	0	0.1	0	0.1	0	0	0	0	2.07	0.1	3.5	0	0.1	0
12.96	0	0	0	0	0	0	0	0	0	0	0.1	0.1	0.1	0	0.1	0
98.69	0	0	0	0	0	0	0	0	0	0	0.1	0	1.8	0	1.4	0
19.17	0	0	0	0	0	0.1	1.2	0	0	0	8.73	0.1	0.1	0.1	4.7	0.3
0.3	0.1	0	0	0	0	0	6.1	0	0	0	0.1	0	0	0	0.1	0.1
0.1	0.1	0	0	0	0.1	0.1	0.1	0	0	0	0.1	0	0.1	0	0.1	0.1
0.1	0.1	0	0	0.1	0.1	0.1	3.8	0	0	0	0.1	0	0	0	0.1	0.7
0.1	0.1	0	0	0	0.1	0	6.3	0	0	0	0.1	0	5.23	0	0.1	0.1
0.9	0	6.97	0	0	0.1	0.1	8.8	0	0	0	0.1	0.1	6.1	0	0.1	2.2
0.6	0	0.1	0	0	0	0.1	32.39	0	0	0	0.1	0	0	0	0.1	8.8
0.9	0	0	0	0	6	0.2	49.88	0	0	0	17.6	0.1	0.1	1.7	0.1	87.58
2	0	0.6	0	0	18.46	0.1	35.66	0.7	0	0	2.9	0.1	3.5	3.8	0.1	63.67
2.8	0.4	7.08	0	1.84	2.4	0.1	25.13	2	0.1	0.1	1.88	0.1	9.8	14.91	0.1	59.31
3.5	2.7	9.25	0	0.8	24.28	0.1	28.26	0.2	0.1	0.1	0.1	0.1	7.7	0.1	0.1	46.44
7.53	6.97	0.1	0.1	123.95	80.2	0.1	2.41	1.33	0.4	0.3	0.1	30.42	4.2	0.1	0.1	11.97
23.18	5.6	0.1	0	37.92	0.8	87.28	0.6	0.1	0	0	0.1	3.5	0.4	0.1	2.3	12.09
3.1	0.1	5	0.1	0.1	0.1	105.38	5.2	0.1	3.55	3.12	10.35	1.1	0.1	0.1	0.6	6.9
0.3	0	3.3	0.1	0.1	0.1	10.3	12.48	0.1	7.4	7.1	24.32	0.1	0.1	44.11	0.1	8.6
0.96	0.1	12.2	0.1	0.1	3.43	27.98	0.2	7.5	1	0.7	0.1	0.3	0.6	37.88	0.1	6.08
6.71	0.1	28.94	0.1	0.5	7.1	19.02	0.1	26.15	0.1	0.1	0.1	10.78	6	0.1	6.2	1
4.13	7.26	0.1	0.1	21.71	26.07	19.2	7.2	2.3	0.8	0.6	0.1	17.9	14.26	0.1	11.11	5.9
17.07	12	2.2	0.1	48.79	54.1	111.7	9.71	0.1	0.6	0.4	14.18	9.23	6	1	6.81	5.8
11.9	28.49	2.93	0.1	48.14	0.3	247	1.11	1	19.48	22.12	0.2	13.9	0.1	0.1	27.33	4.15
1.8	1	10.7	0.1	0.5	3.2	262.48	0.3	4.89	32.95	37.99	0.1	1.4	0.1	0.3	3.4	4.6
2.1	2.6	2.3	0.3	0.6	1.06	142.62	0.33	18.63	29.44	33.97	0.1	3.4	0.1	0	0.4	2.3
0.1	10.05	3	0.6	1.4	3.4	36.18	28.24	4.02	19.47	22.11	0.1	5.2	0.1	0.1	0.1	29.82
0.1	0.1	12.83	0.3	0.1	2.1	6.95	35.9	2.2	16.2	18.81	1.1	2.1	0.1	0.1	1	54.88
0.4	0.1	40.83	7.25	0.1	2.7	0.14	31.17	0.2	30.84	36.11	16.45	1.1	0.1	19.17	3.3	26.02
[truncated: 25,376 more rows]
